# Supplementary material for: Quantification of the thermodynamic effects of the low-spin – high-spin interaction in molecular crystals of a mononuclear iron(ii) spin crossover complex.
Source: Royal Society of Chemistry journal article supplement (doi:10.1039/d4dt00613e), 2024-01-01
Supplement: d4dt00613e1.pdf [file d4dt00613e1.pdf]

Juliusz A. Wolny, Konstatin Gröpl, Jonathan Kiehl, Eva Rentschler, Volker Schünemann

Quantification of the thermodynamic effects of the low-spin – high-spin interaction in molecular crystals of a mononuclear iron(II) spin crossover complex

Supplementary Materials.

Table of contents.

1. PDB file of the optimised structure of the 15-nuclear model of the LS centre in LS matrix
2. PDB file of the optimised structure of the 15-nuclear model of the HS centre in LS matrix
3. PDB file of the optimised structure of the 15-nuclear model of the LS centre in Zn matrix
4. PDB file of the optimised structure of the 15-nuclear model of the HS centre in LS matrix
5. The description of the movies illustrating the first 10 vibrational modes for model systems.

Table 1. PDB file of the optimised structure of the 15-nuclear model of the LS centre in LS matrix

| TITLE  | CSD ENTRY | jmk-126-9-90kslow                |   |        |       |       |
|--------|-----------|----------------------------------|---|--------|-------|-------|
| REMARK | 1         | File created by GaussView 6.0.16 |   |        |       |       |
| HETATM | 1         | Fe                               | 0 | 18.380 | 6.240 | 0.757 |
| Fe     |           |                                  |   |        |       |       |
| HETATM | 2         | S                                | 0 | 22.643 | 7.032 | 1.570 |
| S      |           |                                  |   |        |       |       |
| HETATM | 3         | S                                | 0 | 17.251 | 8.932 | 4.482 |
| S      |           |                                  |   |        |       |       |
| HETATM | 4         | N                                | 0 | 19.242 | 5.025 | 2.125 |
| N      |           |                                  |   |        |       |       |
| HETATM | 5         | N                                | 0 | 20.219 | 7.028 | 0.793 |
| N      |           |                                  |   |        |       |       |
| HETATM | 6         | N                                | 0 | 20.790 | 8.090 | 0.144 |
| N      |           |                                  |   |        |       |       |
| HETATM | 7         | N                                | 0 | 17.855 | 7.422 | 2.205 |
| N      |           |                                  |   |        |       |       |
| HETATM | 8         | C                                | 0 | 18.673 | 4.046 | 2.816 |
| C      |           |                                  |   |        |       |       |
| HETATM | 9         | H                                | 0 | 17.744 | 3.888 | 2.703 |
| H      |           |                                  |   |        |       |       |
| HETATM | 10        | C                                | 0 | 19.386 | 3.246 | 3.698 |
| C      |           |                                  |   |        |       |       |
| HETATM | 11        | H                                | 0 | 18.946 | 2.540 | 4.158 |
| H      |           |                                  |   |        |       |       |
| HETATM | 12        | C                                | 0 | 20.720 | 3.472 | 3.909 |
| C      |           |                                  |   |        |       |       |
| HETATM | 13        | H                                | 0 | 21.216 | 2.928 | 4.509 |
| H      |           |                                  |   |        |       |       |
| HETATM | 14        | C                                | 0 | 21.329 | 4.509 | 3.227 |
| C      |           |                                  |   |        |       |       |
| HETATM | 15        | H                                | 0 | 22.250 | 4.701 | 3.360 |
| H      |           |                                  |   |        |       |       |
| HETATM | 16        | C                                | 0 | 20.568 | 5.267 | 2.345 |
| C      |           |                                  |   |        |       |       |

|        |    |   |   |        |        |        |
|--------|----|---|---|--------|--------|--------|
| HETATM | 17 | C | 0 | 21.051 | 6.389  | 1.575  |
| C      |    |   |   |        |        |        |
| HETATM | 18 | C | 0 | 22.054 | 8.216  | 0.434  |
| C      |    |   |   |        |        |        |
| HETATM | 19 | C | 0 | 22.947 | 9.241  | -0.123 |
| C      |    |   |   |        |        |        |
| HETATM | 20 | C | 0 | 22.423 | 10.314 | -0.881 |
| C      |    |   |   |        |        |        |
| HETATM | 21 | H | 0 | 21.484 | 10.385 | -1.004 |
| H      |    |   |   |        |        |        |
| HETATM | 22 | C | 0 | 23.240 | 11.240 | -1.433 |
| C      |    |   |   |        |        |        |
| HETATM | 23 | H | 0 | 22.866 | 11.958 | -1.930 |
| H      |    |   |   |        |        |        |
| HETATM | 24 | C | 0 | 24.651 | 11.155 | -1.281 |
| C      |    |   |   |        |        |        |
| HETATM | 25 | C | 0 | 25.538 | 12.085 | -1.862 |
| C      |    |   |   |        |        |        |
| HETATM | 26 | H | 0 | 25.191 | 12.809 | -2.371 |
| H      |    |   |   |        |        |        |
| HETATM | 27 | C | 0 | 26.895 | 11.959 | -1.704 |
| C      |    |   |   |        |        |        |
| HETATM | 28 | H | 0 | 27.476 | 12.596 | -2.103 |
| H      |    |   |   |        |        |        |
| HETATM | 29 | C | 0 | 27.434 | 10.893 | -0.955 |
| C      |    |   |   |        |        |        |
| HETATM | 30 | H | 0 | 28.374 | 10.814 | -0.850 |
| H      |    |   |   |        |        |        |
| HETATM | 31 | C | 0 | 26.604 | 9.974  | -0.381 |
| C      |    |   |   |        |        |        |
| HETATM | 32 | H | 0 | 26.973 | 9.259  | 0.121  |
| H      |    |   |   |        |        |        |
| HETATM | 33 | C | 0 | 25.192 | 10.075 | -0.528 |
| C      |    |   |   |        |        |        |
| HETATM | 34 | C | 0 | 24.314 | 9.138  | 0.042  |
| C      |    |   |   |        |        |        |
| HETATM | 35 | H | 0 | 24.668 | 8.418  | 0.552  |
| H      |    |   |   |        |        |        |
| HETATM | 36 | C | 0 | 17.614 | 8.050  | 3.134  |
| C      |    |   |   |        |        |        |
| HETATM | 37 | S | 0 | 14.117 | 5.447  | -0.057 |
| S      |    |   |   |        |        |        |
| HETATM | 38 | S | 0 | 19.509 | 3.547  | -2.970 |
| S      |    |   |   |        |        |        |
| HETATM | 39 | N | 0 | 17.518 | 7.455  | -0.613 |
| N      |    |   |   |        |        |        |
| HETATM | 40 | N | 0 | 16.541 | 5.451  | 0.719  |
| N      |    |   |   |        |        |        |
| HETATM | 41 | N | 0 | 15.970 | 4.389  | 1.368  |
| N      |    |   |   |        |        |        |
| HETATM | 42 | N | 0 | 18.905 | 5.058  | -0.693 |
| N      |    |   |   |        |        |        |
| HETATM | 43 | C | 0 | 18.087 | 8.433  | -1.303 |
| C      |    |   |   |        |        |        |
| HETATM | 44 | H | 0 | 19.017 | 8.592  | -1.190 |
| H      |    |   |   |        |        |        |

|        |    |    |   |        |        |        |
|--------|----|----|---|--------|--------|--------|
| HETATM | 45 | C  | 0 | 17.374 | 9.233  | -2.185 |
| C      |    |    |   |        |        |        |
| HETATM | 46 | H  | 0 | 17.814 | 9.939  | -2.646 |
| H      |    |    |   |        |        |        |
| HETATM | 47 | C  | 0 | 16.040 | 9.007  | -2.397 |
| C      |    |    |   |        |        |        |
| HETATM | 48 | H  | 0 | 15.545 | 9.551  | -2.997 |
| H      |    |    |   |        |        |        |
| HETATM | 49 | C  | 0 | 15.431 | 7.970  | -1.715 |
| C      |    |    |   |        |        |        |
| HETATM | 50 | H  | 0 | 14.511 | 7.778  | -1.848 |
| H      |    |    |   |        |        |        |
| HETATM | 51 | C  | 0 | 16.192 | 7.212  | -0.832 |
| C      |    |    |   |        |        |        |
| HETATM | 52 | C  | 0 | 15.709 | 6.090  | -0.063 |
| C      |    |    |   |        |        |        |
| HETATM | 53 | C  | 0 | 14.707 | 4.263  | 1.079  |
| C      |    |    |   |        |        |        |
| HETATM | 54 | C  | 0 | 13.813 | 3.238  | 1.636  |
| C      |    |    |   |        |        |        |
| HETATM | 55 | C  | 0 | 14.337 | 2.166  | 2.393  |
| C      |    |    |   |        |        |        |
| HETATM | 56 | H  | 0 | 15.277 | 2.094  | 2.516  |
| H      |    |    |   |        |        |        |
| HETATM | 57 | C  | 0 | 13.520 | 1.239  | 2.945  |
| C      |    |    |   |        |        |        |
| HETATM | 58 | H  | 0 | 13.895 | 0.521  | 3.442  |
| H      |    |    |   |        |        |        |
| HETATM | 59 | C  | 0 | 12.109 | 1.324  | 2.793  |
| C      |    |    |   |        |        |        |
| HETATM | 60 | C  | 0 | 11.222 | 0.394  | 3.375  |
| C      |    |    |   |        |        |        |
| HETATM | 61 | H  | 0 | 11.569 | -0.329 | 3.883  |
| H      |    |    |   |        |        |        |
| HETATM | 62 | C  | 0 | 9.866  | 0.521  | 3.217  |
| C      |    |    |   |        |        |        |
| HETATM | 63 | H  | 0 | 9.284  | -0.116 | 3.615  |
| H      |    |    |   |        |        |        |
| HETATM | 64 | C  | 0 | 9.327  | 1.587  | 2.467  |
| C      |    |    |   |        |        |        |
| HETATM | 65 | H  | 0 | 8.386  | 1.665  | 2.362  |
| H      |    |    |   |        |        |        |
| HETATM | 66 | C  | 0 | 10.157 | 2.504  | 1.893  |
| C      |    |    |   |        |        |        |
| HETATM | 67 | H  | 0 | 9.788  | 3.220  | 1.391  |
| H      |    |    |   |        |        |        |
| HETATM | 68 | C  | 0 | 11.568 | 2.404  | 2.040  |
| C      |    |    |   |        |        |        |
| HETATM | 69 | C  | 0 | 12.446 | 3.341  | 1.470  |
| C      |    |    |   |        |        |        |
| HETATM | 70 | H  | 0 | 12.093 | 4.061  | 0.960  |
| H      |    |    |   |        |        |        |
| HETATM | 71 | C  | 0 | 19.148 | 4.430  | -1.622 |
| C      |    |    |   |        |        |        |
| HETATM | 72 | Fe | 0 | 14.551 | -5.509 | 0.284  |
| Fe     |    |    |   |        |        |        |

|        |     |   |   |        |        |        |
|--------|-----|---|---|--------|--------|--------|
| HETATM | 73  | S | 0 | 18.813 | -4.717 | 1.098  |
| S      |     |   |   |        |        |        |
| HETATM | 74  | S | 0 | 13.422 | -2.816 | 4.010  |
| S      |     |   |   |        |        |        |
| HETATM | 75  | N | 0 | 15.413 | -6.724 | 1.653  |
| N      |     |   |   |        |        |        |
| HETATM | 76  | N | 0 | 16.390 | -4.720 | 0.321  |
| N      |     |   |   |        |        |        |
| HETATM | 77  | N | 0 | 16.961 | -3.658 | -0.327 |
| N      |     |   |   |        |        |        |
| HETATM | 78  | N | 0 | 14.026 | -4.326 | 1.734  |
| N      |     |   |   |        |        |        |
| HETATM | 79  | C | 0 | 14.844 | -7.701 | 2.344  |
| C      |     |   |   |        |        |        |
| HETATM | 80  | H | 0 | 13.914 | -7.861 | 2.231  |
| H      |     |   |   |        |        |        |
| HETATM | 81  | C | 0 | 15.556 | -8.503 | 3.226  |
| C      |     |   |   |        |        |        |
| HETATM | 82  | H | 0 | 15.116 | -9.209 | 3.686  |
| H      |     |   |   |        |        |        |
| HETATM | 83  | C | 0 | 16.890 | -8.277 | 3.438  |
| C      |     |   |   |        |        |        |
| HETATM | 84  | H | 0 | 17.386 | -8.821 | 4.037  |
| H      |     |   |   |        |        |        |
| HETATM | 85  | C | 0 | 17.499 | -7.240 | 2.756  |
| C      |     |   |   |        |        |        |
| HETATM | 86  | H | 0 | 18.420 | -7.047 | 2.889  |
| H      |     |   |   |        |        |        |
| HETATM | 87  | C | 0 | 16.738 | -6.482 | 1.873  |
| C      |     |   |   |        |        |        |
| HETATM | 88  | C | 0 | 17.222 | -5.360 | 1.104  |
| C      |     |   |   |        |        |        |
| HETATM | 89  | C | 0 | 18.224 | -3.533 | -0.038 |
| C      |     |   |   |        |        |        |
| HETATM | 90  | C | 0 | 19.118 | -2.507 | -0.596 |
| C      |     |   |   |        |        |        |
| HETATM | 91  | C | 0 | 18.594 | -1.435 | -1.352 |
| C      |     |   |   |        |        |        |
| HETATM | 92  | H | 0 | 17.654 | -1.364 | -1.475 |
| H      |     |   |   |        |        |        |
| HETATM | 93  | C | 0 | 19.410 | -0.509 | -1.905 |
| C      |     |   |   |        |        |        |
| HETATM | 94  | H | 0 | 19.036 | 0.210  | -2.401 |
| H      |     |   |   |        |        |        |
| HETATM | 95  | C | 0 | 20.821 | -0.594 | -1.753 |
| C      |     |   |   |        |        |        |
| HETATM | 96  | C | 0 | 21.709 | 0.336  | -2.335 |
| C      |     |   |   |        |        |        |
| HETATM | 97  | H | 0 | 21.362 | 1.060  | -2.842 |
| H      |     |   |   |        |        |        |
| HETATM | 98  | C | 0 | 23.065 | 0.210  | -2.176 |
| C      |     |   |   |        |        |        |
| HETATM | 99  | H | 0 | 23.647 | 0.847  | -2.574 |
| H      |     |   |   |        |        |        |
| HETATM | 100 | C | 0 | 23.604 | -0.856 | -1.427 |
| C      |     |   |   |        |        |        |

|        |     |   |   |        |         |        |
|--------|-----|---|---|--------|---------|--------|
| HETATM | 101 | H | 0 | 24.545 | -0.934  | -1.321 |
| H      |     |   |   |        |         |        |
| HETATM | 102 | C | 0 | 22.774 | -1.774  | -0.853 |
| C      |     |   |   |        |         |        |
| HETATM | 103 | H | 0 | 23.143 | -2.490  | -0.350 |
| H      |     |   |   |        |         |        |
| HETATM | 104 | C | 0 | 21.363 | -1.673  | -1.000 |
| C      |     |   |   |        |         |        |
| HETATM | 105 | C | 0 | 20.484 | -2.611  | -0.429 |
| C      |     |   |   |        |         |        |
| HETATM | 106 | H | 0 | 20.838 | -3.331  | 0.081  |
| H      |     |   |   |        |         |        |
| HETATM | 107 | C | 0 | 13.783 | -3.699  | 2.662  |
| C      |     |   |   |        |         |        |
| HETATM | 108 | S | 0 | 10.288 | -6.301  | -0.530 |
| S      |     |   |   |        |         |        |
| HETATM | 109 | S | 0 | 15.680 | -8.202  | -3.441 |
| S      |     |   |   |        |         |        |
| HETATM | 110 | N | 0 | 13.689 | -4.294  | -1.084 |
| N      |     |   |   |        |         |        |
| HETATM | 111 | N | 0 | 12.712 | -6.297  | 0.248  |
| N      |     |   |   |        |         |        |
| HETATM | 112 | N | 0 | 12.141 | -7.360  | 0.896  |
| N      |     |   |   |        |         |        |
| HETATM | 113 | N | 0 | 15.076 | -6.691  | -1.165 |
| N      |     |   |   |        |         |        |
| HETATM | 114 | C | 0 | 14.258 | -3.316  | -1.775 |
| C      |     |   |   |        |         |        |
| HETATM | 115 | H | 0 | 15.187 | -3.157  | -1.663 |
| H      |     |   |   |        |         |        |
| HETATM | 116 | C | 0 | 13.545 | -2.515  | -2.658 |
| C      |     |   |   |        |         |        |
| HETATM | 117 | H | 0 | 13.985 | -1.809  | -3.117 |
| H      |     |   |   |        |         |        |
| HETATM | 118 | C | 0 | 12.211 | -2.741  | -2.868 |
| C      |     |   |   |        |         |        |
| HETATM | 119 | H | 0 | 11.714 | -2.198  | -3.468 |
| H      |     |   |   |        |         |        |
| HETATM | 120 | C | 0 | 11.602 | -3.779  | -2.187 |
| C      |     |   |   |        |         |        |
| HETATM | 121 | H | 0 | 10.681 | -3.971  | -2.320 |
| H      |     |   |   |        |         |        |
| HETATM | 122 | C | 0 | 12.363 | -4.536  | -1.304 |
| C      |     |   |   |        |         |        |
| HETATM | 123 | C | 0 | 11.879 | -5.659  | -0.535 |
| C      |     |   |   |        |         |        |
| HETATM | 124 | C | 0 | 10.876 | -7.486  | 0.606  |
| C      |     |   |   |        |         |        |
| HETATM | 125 | C | 0 | 9.983  | -8.511  | 1.164  |
| C      |     |   |   |        |         |        |
| HETATM | 126 | C | 0 | 10.508 | -9.583  | 1.922  |
| C      |     |   |   |        |         |        |
| HETATM | 127 | H | 0 | 11.446 | -9.655  | 2.044  |
| H      |     |   |   |        |         |        |
| HETATM | 128 | C | 0 | 9.691  | -10.510 | 2.473  |
| C      |     |   |   |        |         |        |

|        |     |    |   |        |         |        |
|--------|-----|----|---|--------|---------|--------|
| HETATM | 129 | H  | 0 | 10.065 | -11.227 | 2.970  |
| H      |     |    |   |        |         |        |
| HETATM | 130 | C  | 0 | 8.280  | -10.425 | 2.322  |
| C      |     |    |   |        |         |        |
| HETATM | 131 | C  | 0 | 7.393  | -11.354 | 2.903  |
| C      |     |    |   |        |         |        |
| HETATM | 132 | H  | 0 | 7.740  | -12.078 | 3.412  |
| H      |     |    |   |        |         |        |
| HETATM | 133 | C  | 0 | 6.036  | -11.227 | 2.745  |
| C      |     |    |   |        |         |        |
| HETATM | 134 | H  | 0 | 5.455  | -11.865 | 3.143  |
| H      |     |    |   |        |         |        |
| HETATM | 135 | C  | 0 | 5.497  | -10.162 | 1.996  |
| C      |     |    |   |        |         |        |
| HETATM | 136 | H  | 0 | 4.557  | -10.084 | 1.890  |
| H      |     |    |   |        |         |        |
| HETATM | 137 | C  | 0 | 6.327  | -9.243  | 1.422  |
| C      |     |    |   |        |         |        |
| HETATM | 138 | H  | 0 | 5.957  | -8.528  | 0.920  |
| H      |     |    |   |        |         |        |
| HETATM | 139 | C  | 0 | 7.739  | -9.345  | 1.569  |
| C      |     |    |   |        |         |        |
| HETATM | 140 | C  | 0 | 8.617  | -8.407  | 0.998  |
| C      |     |    |   |        |         |        |
| HETATM | 141 | H  | 0 | 8.262  | -7.688  | 0.489  |
| H      |     |    |   |        |         |        |
| HETATM | 142 | C  | 0 | 15.317 | -7.319  | -2.093 |
| C      |     |    |   |        |         |        |
| HETATM | 143 | Fe | 0 | 10.721 | -17.258 | -0.187 |
| Fe     |     |    |   |        |         |        |
| HETATM | 144 | S  | 0 | 14.984 | -16.466 | 0.627  |
| S      |     |    |   |        |         |        |
| HETATM | 145 | S  | 0 | 9.592  | -14.565 | 3.539  |
| S      |     |    |   |        |         |        |
| HETATM | 146 | N  | 0 | 11.583 | -18.472 | 1.181  |
| N      |     |    |   |        |         |        |
| HETATM | 147 | N  | 0 | 12.560 | -16.469 | -0.151 |
| N      |     |    |   |        |         |        |
| HETATM | 148 | N  | 0 | 13.131 | -15.406 | -0.799 |
| N      |     |    |   |        |         |        |
| HETATM | 149 | N  | 0 | 10.195 | -16.075 | 1.263  |
| N      |     |    |   |        |         |        |
| HETATM | 150 | C  | 0 | 11.015 | -19.450 | 1.872  |
| C      |     |    |   |        |         |        |
| HETATM | 151 | H  | 0 | 10.084 | -19.610 | 1.760  |
| H      |     |    |   |        |         |        |
| HETATM | 152 | C  | 0 | 11.726 | -20.252 | 2.755  |
| C      |     |    |   |        |         |        |
| HETATM | 153 | H  | 0 | 11.287 | -20.958 | 3.215  |
| H      |     |    |   |        |         |        |
| HETATM | 154 | C  | 0 | 13.060 | -20.025 | 2.965  |
| C      |     |    |   |        |         |        |
| HETATM | 155 | H  | 0 | 13.556 | -20.570 | 3.565  |
| H      |     |    |   |        |         |        |
| HETATM | 156 | C  | 0 | 13.670 | -18.988 | 2.285  |
| C      |     |    |   |        |         |        |

|        |     |   |   |        |         |        |
|--------|-----|---|---|--------|---------|--------|
| HETATM | 157 | H | 0 | 14.591 | -18.795 | 2.417  |
| H      |     |   |   |        |         |        |
| HETATM | 158 | C | 0 | 12.909 | -18.231 | 1.401  |
| C      |     |   |   |        |         |        |
| HETATM | 159 | C | 0 | 13.392 | -17.109 | 0.632  |
| C      |     |   |   |        |         |        |
| HETATM | 160 | C | 0 | 14.395 | -15.281 | -0.509 |
| C      |     |   |   |        |         |        |
| HETATM | 161 | C | 0 | 15.289 | -14.255 | -1.067 |
| C      |     |   |   |        |         |        |
| HETATM | 162 | C | 0 | 14.764 | -13.184 | -1.824 |
| C      |     |   |   |        |         |        |
| HETATM | 163 | H | 0 | 13.825 | -13.112 | -1.947 |
| H      |     |   |   |        |         |        |
| HETATM | 164 | C | 0 | 15.580 | -12.257 | -2.376 |
| C      |     |   |   |        |         |        |
| HETATM | 165 | H | 0 | 15.206 | -11.539 | -2.873 |
| H      |     |   |   |        |         |        |
| HETATM | 166 | C | 0 | 16.992 | -12.342 | -2.225 |
| C      |     |   |   |        |         |        |
| HETATM | 167 | C | 0 | 17.879 | -11.413 | -2.806 |
| C      |     |   |   |        |         |        |
| HETATM | 168 | H | 0 | 17.532 | -10.689 | -3.314 |
| H      |     |   |   |        |         |        |
| HETATM | 169 | C | 0 | 19.236 | -11.539 | -2.648 |
| C      |     |   |   |        |         |        |
| HETATM | 170 | H | 0 | 19.817 | -10.902 | -3.046 |
| H      |     |   |   |        |         |        |
| HETATM | 171 | C | 0 | 19.774 | -12.605 | -1.898 |
| C      |     |   |   |        |         |        |
| HETATM | 172 | H | 0 | 20.715 | -12.683 | -1.793 |
| H      |     |   |   |        |         |        |
| HETATM | 173 | C | 0 | 18.944 | -13.523 | -1.325 |
| C      |     |   |   |        |         |        |
| HETATM | 174 | H | 0 | 19.314 | -14.238 | -0.822 |
| H      |     |   |   |        |         |        |
| HETATM | 175 | C | 0 | 17.532 | -13.421 | -1.471 |
| C      |     |   |   |        |         |        |
| HETATM | 176 | C | 0 | 16.655 | -14.360 | -0.902 |
| C      |     |   |   |        |         |        |
| HETATM | 177 | H | 0 | 17.009 | -15.078 | -0.392 |
| H      |     |   |   |        |         |        |
| HETATM | 178 | C | 0 | 9.954  | -15.448 | 2.191  |
| C      |     |   |   |        |         |        |
| HETATM | 179 | S | 0 | 6.458  | -18.049 | -1.001 |
| S      |     |   |   |        |         |        |
| HETATM | 180 | S | 0 | 11.851 | -19.950 | -3.914 |
| S      |     |   |   |        |         |        |
| HETATM | 181 | N | 0 | 9.859  | -16.043 | -1.555 |
| N      |     |   |   |        |         |        |
| HETATM | 182 | N | 0 | 8.882  | -18.046 | -0.223 |
| N      |     |   |   |        |         |        |
| HETATM | 183 | N | 0 | 8.311  | -19.109 | 0.425  |
| N      |     |   |   |        |         |        |
| HETATM | 184 | N | 0 | 11.246 | -18.440 | -1.637 |
| N      |     |   |   |        |         |        |

|        |     |   |   |        |         |        |
|--------|-----|---|---|--------|---------|--------|
| HETATM | 185 | C | 0 | 10.428 | -15.065 | -2.247 |
| C      |     |   |   |        |         |        |
| HETATM | 186 | H | 0 | 11.358 | -14.906 | -2.134 |
| H      |     |   |   |        |         |        |
| HETATM | 187 | C | 0 | 9.716  | -14.263 | -3.129 |
| C      |     |   |   |        |         |        |
| HETATM | 188 | H | 0 | 10.156 | -13.558 | -3.589 |
| H      |     |   |   |        |         |        |
| HETATM | 189 | C | 0 | 8.382  | -14.490 | -3.340 |
| C      |     |   |   |        |         |        |
| HETATM | 190 | H | 0 | 7.885  | -13.946 | -3.940 |
| H      |     |   |   |        |         |        |
| HETATM | 191 | C | 0 | 7.773  | -15.527 | -2.659 |
| C      |     |   |   |        |         |        |
| HETATM | 192 | H | 0 | 6.851  | -15.720 | -2.791 |
| H      |     |   |   |        |         |        |
| HETATM | 193 | C | 0 | 8.534  | -16.284 | -1.776 |
| C      |     |   |   |        |         |        |
| HETATM | 194 | C | 0 | 8.050  | -17.407 | -1.007 |
| C      |     |   |   |        |         |        |
| HETATM | 195 | C | 0 | 7.047  | -19.234 | 0.135  |
| C      |     |   |   |        |         |        |
| HETATM | 196 | C | 0 | 6.153  | -20.260 | 0.692  |
| C      |     |   |   |        |         |        |
| HETATM | 197 | C | 0 | 6.679  | -21.332 | 1.449  |
| C      |     |   |   |        |         |        |
| HETATM | 198 | H | 0 | 7.617  | -21.403 | 1.572  |
| H      |     |   |   |        |         |        |
| HETATM | 199 | C | 0 | 5.862  | -22.258 | 2.002  |
| C      |     |   |   |        |         |        |
| HETATM | 200 | H | 0 | 6.235  | -22.976 | 2.499  |
| H      |     |   |   |        |         |        |
| HETATM | 201 | C | 0 | 4.451  | -22.174 | 1.850  |
| C      |     |   |   |        |         |        |
| HETATM | 202 | C | 0 | 3.562  | -23.102 | 2.431  |
| C      |     |   |   |        |         |        |
| HETATM | 203 | H | 0 | 3.910  | -23.826 | 2.939  |
| H      |     |   |   |        |         |        |
| HETATM | 204 | C | 0 | 2.206  | -22.976 | 2.273  |
| C      |     |   |   |        |         |        |
| HETATM | 205 | H | 0 | 1.624  | -23.613 | 2.672  |
| H      |     |   |   |        |         |        |
| HETATM | 206 | C | 0 | 1.668  | -21.910 | 1.524  |
| C      |     |   |   |        |         |        |
| HETATM | 207 | H | 0 | 0.728  | -21.832 | 1.419  |
| H      |     |   |   |        |         |        |
| HETATM | 208 | C | 0 | 2.497  | -20.992 | 0.951  |
| C      |     |   |   |        |         |        |
| HETATM | 209 | H | 0 | 2.128  | -20.276 | 0.447  |
| H      |     |   |   |        |         |        |
| HETATM | 210 | C | 0 | 3.909  | -21.094 | 1.097  |
| C      |     |   |   |        |         |        |
| HETATM | 211 | C | 0 | 4.787  | -20.156 | 0.527  |
| C      |     |   |   |        |         |        |
| HETATM | 212 | H | 0 | 4.433  | -19.437 | 0.017  |
| H      |     |   |   |        |         |        |



|        |     |    |   |        |         |        |
|--------|-----|----|---|--------|---------|--------|
| HETATM | 213 | C  | 0 | 11.488 | -19.067 | -2.565 |
| C      |     |    |   |        |         |        |
| HETATM | 214 | Fe | 0 | 11.105 | 8.994   | 0.614  |
| Fe     |     |    |   |        |         |        |
| HETATM | 215 | S  | 0 | 15.368 | 9.786   | 1.428  |
| S      |     |    |   |        |         |        |
| HETATM | 216 | S  | 0 | 9.975  | 11.687  | 4.340  |
| S      |     |    |   |        |         |        |
| HETATM | 217 | N  | 0 | 11.967 | 7.780   | 1.982  |
| N      |     |    |   |        |         |        |
| HETATM | 218 | N  | 0 | 12.943 | 9.782   | 0.650  |
| N      |     |    |   |        |         |        |
| HETATM | 219 | N  | 0 | 13.514 | 10.845  | 0.002  |
| N      |     |    |   |        |         |        |
| HETATM | 220 | N  | 0 | 10.580 | 10.177  | 2.063  |
| N      |     |    |   |        |         |        |
| HETATM | 221 | C  | 0 | 11.398 | 6.801   | 2.674  |
| C      |     |    |   |        |         |        |
| HETATM | 222 | H  | 0 | 10.468 | 6.642   | 2.561  |
| H      |     |    |   |        |         |        |
| HETATM | 223 | C  | 0 | 12.110 | 6.000   | 3.556  |
| C      |     |    |   |        |         |        |
| HETATM | 224 | H  | 0 | 11.670 | 5.295   | 4.015  |
| H      |     |    |   |        |         |        |
| HETATM | 225 | C  | 0 | 13.444 | 6.227   | 3.767  |
| C      |     |    |   |        |         |        |
| HETATM | 226 | H  | 0 | 13.940 | 5.682   | 4.367  |
| H      |     |    |   |        |         |        |
| HETATM | 227 | C  | 0 | 14.054 | 7.264   | 3.085  |
| C      |     |    |   |        |         |        |
| HETATM | 228 | H  | 0 | 14.974 | 7.456   | 3.218  |
| H      |     |    |   |        |         |        |
| HETATM | 229 | C  | 0 | 13.293 | 8.021   | 2.203  |
| C      |     |    |   |        |         |        |
| HETATM | 230 | C  | 0 | 13.776 | 9.144   | 1.433  |
| C      |     |    |   |        |         |        |
| HETATM | 231 | C  | 0 | 14.778 | 10.970  | 0.292  |
| C      |     |    |   |        |         |        |
| HETATM | 232 | C  | 0 | 15.673 | 11.996  | -0.266 |
| C      |     |    |   |        |         |        |
| HETATM | 233 | C  | 0 | 15.147 | 13.069  | -1.023 |
| C      |     |    |   |        |         |        |
| HETATM | 234 | H  | 0 | 14.209 | 13.140  | -1.146 |
| H      |     |    |   |        |         |        |
| HETATM | 235 | C  | 0 | 15.964 | 13.995  | -1.576 |
| C      |     |    |   |        |         |        |
| HETATM | 236 | H  | 0 | 15.590 | 14.712  | -2.072 |
| H      |     |    |   |        |         |        |
| HETATM | 237 | C  | 0 | 17.375 | 13.910  | -1.423 |
| C      |     |    |   |        |         |        |
| HETATM | 238 | C  | 0 | 18.263 | 14.839  | -2.004 |
| C      |     |    |   |        |         |        |
| HETATM | 239 | H  | 0 | 17.916 | 15.563  | -2.513 |
| H      |     |    |   |        |         |        |
| HETATM | 240 | C  | 0 | 19.620 | 14.713  | -1.846 |
| C      |     |    |   |        |         |        |

|        |     |   |   |        |        |        |
|--------|-----|---|---|--------|--------|--------|
| HETATM | 241 | H | 0 | 20.202 | 15.350 | -2.245 |
| H      |     |   |   |        |        |        |
| HETATM | 242 | C | 0 | 20.158 | 13.647 | -1.098 |
| C      |     |   |   |        |        |        |
| HETATM | 243 | H | 0 | 21.099 | 13.569 | -0.992 |
| H      |     |   |   |        |        |        |
| HETATM | 244 | C | 0 | 19.328 | 12.729 | -0.524 |
| C      |     |   |   |        |        |        |
| HETATM | 245 | H | 0 | 19.698 | 12.013 | -0.021 |
| H      |     |   |   |        |        |        |
| HETATM | 246 | C | 0 | 17.916 | 12.830 | -0.671 |
| C      |     |   |   |        |        |        |
| HETATM | 247 | C | 0 | 17.039 | 11.892 | -0.100 |
| C      |     |   |   |        |        |        |
| HETATM | 248 | H | 0 | 17.393 | 11.173 | 0.410  |
| H      |     |   |   |        |        |        |
| HETATM | 249 | C | 0 | 10.338 | 10.804 | 2.992  |
| C      |     |   |   |        |        |        |
| HETATM | 250 | S | 0 | 6.842  | 8.202  | -0.200 |
| S      |     |   |   |        |        |        |
| HETATM | 251 | S | 0 | 12.234 | 6.301  | -3.112 |
| S      |     |   |   |        |        |        |
| HETATM | 252 | N | 0 | 10.243 | 10.209 | -0.755 |
| N      |     |   |   |        |        |        |
| HETATM | 253 | N | 0 | 9.267  | 8.206  | 0.577  |
| N      |     |   |   |        |        |        |
| HETATM | 254 | N | 0 | 8.695  | 7.143  | 1.225  |
| N      |     |   |   |        |        |        |
| HETATM | 255 | N | 0 | 11.630 | 7.812  | -0.835 |
| N      |     |   |   |        |        |        |
| HETATM | 256 | C | 0 | 10.811 | 11.187 | -1.445 |
| C      |     |   |   |        |        |        |
| HETATM | 257 | H | 0 | 11.742 | 11.346 | -1.332 |
| H      |     |   |   |        |        |        |
| HETATM | 258 | C | 0 | 10.100 | 11.988 | -2.328 |
| C      |     |   |   |        |        |        |
| HETATM | 259 | H | 0 | 10.539 | 12.693 | -2.788 |
| H      |     |   |   |        |        |        |
| HETATM | 260 | C | 0 | 8.766  | 11.761 | -2.539 |
| C      |     |   |   |        |        |        |
| HETATM | 261 | H | 0 | 8.269  | 12.306 | -3.139 |
| H      |     |   |   |        |        |        |
| HETATM | 262 | C | 0 | 8.156  | 10.724 | -1.858 |
| C      |     |   |   |        |        |        |
| HETATM | 263 | H | 0 | 7.235  | 10.532 | -1.991 |
| H      |     |   |   |        |        |        |
| HETATM | 264 | C | 0 | 8.917  | 9.967  | -0.974 |
| C      |     |   |   |        |        |        |
| HETATM | 265 | C | 0 | 8.434  | 8.845  | -0.205 |
| C      |     |   |   |        |        |        |
| HETATM | 266 | C | 0 | 7.431  | 7.017  | 0.937  |
| C      |     |   |   |        |        |        |
| HETATM | 267 | C | 0 | 6.537  | 5.992  | 1.494  |
| C      |     |   |   |        |        |        |
| HETATM | 268 | C | 0 | 7.063  | 4.920  | 2.251  |
| C      |     |   |   |        |        |        |

|        |     |    |   |        |        |        |
|--------|-----|----|---|--------|--------|--------|
| HETATM | 269 | H  | 0 | 8.001  | 4.848  | 2.374  |
| H      |     |    |   |        |        |        |
| HETATM | 270 | C  | 0 | 6.245  | 3.993  | 2.803  |
| C      |     |    |   |        |        |        |
| HETATM | 271 | H  | 0 | 6.620  | 3.276  | 3.300  |
| H      |     |    |   |        |        |        |
| HETATM | 272 | C  | 0 | 4.835  | 4.079  | 2.651  |
| C      |     |    |   |        |        |        |
| HETATM | 273 | C  | 0 | 3.946  | 3.149  | 3.233  |
| C      |     |    |   |        |        |        |
| HETATM | 274 | H  | 0 | 4.294  | 2.426  | 3.741  |
| H      |     |    |   |        |        |        |
| HETATM | 275 | C  | 0 | 2.590  | 3.276  | 3.075  |
| C      |     |    |   |        |        |        |
| HETATM | 276 | H  | 0 | 2.008  | 2.639  | 3.473  |
| H      |     |    |   |        |        |        |
| HETATM | 277 | C  | 0 | 2.052  | 4.341  | 2.325  |
| C      |     |    |   |        |        |        |
| HETATM | 278 | H  | 0 | 1.110  | 4.419  | 2.219  |
| H      |     |    |   |        |        |        |
| HETATM | 279 | C  | 0 | 2.881  | 5.259  | 1.751  |
| C      |     |    |   |        |        |        |
| HETATM | 280 | H  | 0 | 2.512  | 5.975  | 1.249  |
| H      |     |    |   |        |        |        |
| HETATM | 281 | C  | 0 | 4.293  | 5.158  | 1.898  |
| C      |     |    |   |        |        |        |
| HETATM | 282 | C  | 0 | 5.171  | 6.096  | 1.328  |
| C      |     |    |   |        |        |        |
| HETATM | 283 | H  | 0 | 4.817  | 6.815  | 0.818  |
| H      |     |    |   |        |        |        |
| HETATM | 284 | C  | 0 | 11.872 | 7.185  | -1.764 |
| C      |     |    |   |        |        |        |
| HETATM | 285 | Fe | 0 | 7.275  | -2.754 | 0.142  |
| Fe     |     |    |   |        |        |        |
| HETATM | 286 | S  | 0 | 11.538 | -1.962 | 0.956  |
| S      |     |    |   |        |        |        |
| HETATM | 287 | S  | 0 | 6.146  | -0.062 | 3.868  |
| S      |     |    |   |        |        |        |
| HETATM | 288 | N  | 0 | 8.137  | -3.969 | 1.511  |
| N      |     |    |   |        |        |        |
| HETATM | 289 | N  | 0 | 9.114  | -1.966 | 0.179  |
| N      |     |    |   |        |        |        |
| HETATM | 290 | N  | 0 | 9.685  | -0.903 | -0.469 |
| N      |     |    |   |        |        |        |
| HETATM | 291 | N  | 0 | 6.750  | -1.572 | 1.592  |
| N      |     |    |   |        |        |        |
| HETATM | 292 | C  | 0 | 7.568  | -4.947 | 2.201  |
| C      |     |    |   |        |        |        |
| HETATM | 293 | H  | 0 | 6.638  | -5.106 | 2.089  |
| H      |     |    |   |        |        |        |
| HETATM | 294 | C  | 0 | 8.281  | -5.748 | 3.084  |
| C      |     |    |   |        |        |        |
| HETATM | 295 | H  | 0 | 7.841  | -6.454 | 3.544  |
| H      |     |    |   |        |        |        |
| HETATM | 296 | C  | 0 | 9.615  | -5.522 | 3.295  |
| C      |     |    |   |        |        |        |

|        |     |   |   |        |        |        |
|--------|-----|---|---|--------|--------|--------|
| HETATM | 297 | H | 0 | 10.111 | -6.066 | 3.895  |
| H      |     |   |   |        |        |        |
| HETATM | 298 | C | 0 | 10.224 | -4.485 | 2.614  |
| C      |     |   |   |        |        |        |
| HETATM | 299 | H | 0 | 11.145 | -4.292 | 2.747  |
| H      |     |   |   |        |        |        |
| HETATM | 300 | C | 0 | 9.463  | -3.727 | 1.730  |
| C      |     |   |   |        |        |        |
| HETATM | 301 | C | 0 | 9.946  | -2.605 | 0.962  |
| C      |     |   |   |        |        |        |
| HETATM | 302 | C | 0 | 10.949 | -0.778 | -0.180 |
| C      |     |   |   |        |        |        |
| HETATM | 303 | C | 0 | 11.843 | 0.247  | -0.738 |
| C      |     |   |   |        |        |        |
| HETATM | 304 | C | 0 | 11.318 | 1.320  | -1.494 |
| C      |     |   |   |        |        |        |
| HETATM | 305 | H | 0 | 10.379 | 1.391  | -1.617 |
| H      |     |   |   |        |        |        |
| HETATM | 306 | C | 0 | 12.135 | 2.246  | -2.047 |
| C      |     |   |   |        |        |        |
| HETATM | 307 | H | 0 | 11.761 | 2.964  | -2.543 |
| H      |     |   |   |        |        |        |
| HETATM | 308 | C | 0 | 13.545 | 2.161  | -1.895 |
| C      |     |   |   |        |        |        |
| HETATM | 309 | C | 0 | 14.434 | 3.090  | -2.477 |
| C      |     |   |   |        |        |        |
| HETATM | 310 | H | 0 | 14.087 | 3.814  | -2.984 |
| H      |     |   |   |        |        |        |
| HETATM | 311 | C | 0 | 15.790 | 2.964  | -2.318 |
| C      |     |   |   |        |        |        |
| HETATM | 312 | H | 0 | 16.372 | 3.601  | -2.716 |
| H      |     |   |   |        |        |        |
| HETATM | 313 | C | 0 | 16.328 | 1.898  | -1.569 |
| C      |     |   |   |        |        |        |
| HETATM | 314 | H | 0 | 17.269 | 1.820  | -1.463 |
| H      |     |   |   |        |        |        |
| HETATM | 315 | C | 0 | 15.499 | 0.980  | -0.995 |
| C      |     |   |   |        |        |        |
| HETATM | 316 | H | 0 | 15.868 | 0.264  | -0.493 |
| H      |     |   |   |        |        |        |
| HETATM | 317 | C | 0 | 14.087 | 1.082  | -1.142 |
| C      |     |   |   |        |        |        |
| HETATM | 318 | C | 0 | 13.209 | 0.144  | -0.571 |
| C      |     |   |   |        |        |        |
| HETATM | 319 | H | 0 | 13.563 | -0.576 | -0.062 |
| H      |     |   |   |        |        |        |
| HETATM | 320 | C | 0 | 6.508  | -0.945 | 2.520  |
| C      |     |   |   |        |        |        |
| HETATM | 321 | S | 0 | 3.013  | -3.546 | -0.672 |
| S      |     |   |   |        |        |        |
| HETATM | 322 | S | 0 | 8.404  | -5.448 | -3.583 |
| S      |     |   |   |        |        |        |
| HETATM | 323 | N | 0 | 6.413  | -1.540 | -1.226 |
| N      |     |   |   |        |        |        |
| HETATM | 324 | N | 0 | 5.436  | -3.543 | 0.106  |
| N      |     |   |   |        |        |        |

|        |     |   |   |        |        |        |
|--------|-----|---|---|--------|--------|--------|
| HETATM | 325 | N | 0 | 4.866  | -4.606 | 0.754  |
| N      |     |   |   |        |        |        |
| HETATM | 326 | N | 0 | 7.801  | -3.937 | -1.307 |
| N      |     |   |   |        |        |        |
| HETATM | 327 | C | 0 | 6.982  | -0.562 | -1.917 |
| C      |     |   |   |        |        |        |
| HETATM | 328 | H | 0 | 7.913  | -0.402 | -1.805 |
| H      |     |   |   |        |        |        |
| HETATM | 329 | C | 0 | 6.271  | 0.240  | -2.800 |
| C      |     |   |   |        |        |        |
| HETATM | 330 | H | 0 | 6.709  | 0.946  | -3.259 |
| H      |     |   |   |        |        |        |
| HETATM | 331 | C | 0 | 4.937  | 0.013  | -3.010 |
| C      |     |   |   |        |        |        |
| HETATM | 332 | H | 0 | 4.440  | 0.557  | -3.611 |
| H      |     |   |   |        |        |        |
| HETATM | 333 | C | 0 | 4.326  | -1.025 | -2.329 |
| C      |     |   |   |        |        |        |
| HETATM | 334 | H | 0 | 3.406  | -1.217 | -2.462 |
| H      |     |   |   |        |        |        |
| HETATM | 335 | C | 0 | 5.087  | -1.782 | -1.447 |
| C      |     |   |   |        |        |        |
| HETATM | 336 | C | 0 | 4.604  | -2.904 | -0.677 |
| C      |     |   |   |        |        |        |
| HETATM | 337 | C | 0 | 3.602  | -4.731 | 0.464  |
| C      |     |   |   |        |        |        |
| HETATM | 338 | C | 0 | 2.708  | -5.757 | 1.022  |
| C      |     |   |   |        |        |        |
| HETATM | 339 | C | 0 | 3.232  | -6.829 | 1.779  |
| C      |     |   |   |        |        |        |
| HETATM | 340 | H | 0 | 4.171  | -6.901 | 1.902  |
| H      |     |   |   |        |        |        |
| HETATM | 341 | C | 0 | 2.416  | -7.755 | 2.331  |
| C      |     |   |   |        |        |        |
| HETATM | 342 | H | 0 | 2.790  | -8.473 | 2.828  |
| H      |     |   |   |        |        |        |
| HETATM | 343 | C | 0 | 1.004  | -7.670 | 2.179  |
| C      |     |   |   |        |        |        |
| HETATM | 344 | C | 0 | 0.117  | -8.599 | 2.761  |
| C      |     |   |   |        |        |        |
| HETATM | 345 | H | 0 | 0.464  | -9.323 | 3.269  |
| H      |     |   |   |        |        |        |
| HETATM | 346 | C | 0 | -1.239 | -8.473 | 2.602  |
| C      |     |   |   |        |        |        |
| HETATM | 347 | H | 0 | -1.821 | -9.110 | 3.001  |
| H      |     |   |   |        |        |        |
| HETATM | 348 | C | 0 | -1.778 | -7.408 | 1.854  |
| C      |     |   |   |        |        |        |
| HETATM | 349 | H | 0 | -2.719 | -7.330 | 1.748  |
| H      |     |   |   |        |        |        |
| HETATM | 350 | C | 0 | -0.948 | -6.489 | 1.280  |
| C      |     |   |   |        |        |        |
| HETATM | 351 | H | 0 | -1.318 | -5.774 | 0.777  |
| H      |     |   |   |        |        |        |
| HETATM | 352 | C | 0 | 0.464  | -6.591 | 1.427  |
| C      |     |   |   |        |        |        |

|        |     |    |   |        |         |        |
|--------|-----|----|---|--------|---------|--------|
| HETATM | 353 | C  | 0 | 1.342  | -5.652  | 0.856  |
| C      |     |    |   |        |         |        |
| HETATM | 354 | H  | 0 | 0.988  | -4.933  | 0.346  |
| H      |     |    |   |        |         |        |
| HETATM | 355 | C  | 0 | 8.043  | -4.564  | -2.235 |
| C      |     |    |   |        |         |        |
| HETATM | 356 | Fe | 0 | 3.446  | -14.503 | -0.329 |
| Fe     |     |    |   |        |         |        |
| HETATM | 357 | S  | 0 | 7.709  | -13.711 | 0.484  |
| S      |     |    |   |        |         |        |
| HETATM | 358 | S  | 0 | 2.316  | -11.811 | 3.397  |
| S      |     |    |   |        |         |        |
| HETATM | 359 | N  | 0 | 4.308  | -15.718 | 1.039  |
| N      |     |    |   |        |         |        |
| HETATM | 360 | N  | 0 | 5.285  | -13.714 | -0.293 |
| N      |     |    |   |        |         |        |
| HETATM | 361 | N  | 0 | 5.856  | -12.652 | -0.942 |
| N      |     |    |   |        |         |        |
| HETATM | 362 | N  | 0 | 2.921  | -13.321 | 1.120  |
| N      |     |    |   |        |         |        |
| HETATM | 363 | C  | 0 | 3.739  | -16.696 | 1.730  |
| C      |     |    |   |        |         |        |
| HETATM | 364 | H  | 0 | 2.809  | -16.855 | 1.617  |
| H      |     |    |   |        |         |        |
| HETATM | 365 | C  | 0 | 4.451  | -17.497 | 2.612  |
| C      |     |    |   |        |         |        |
| HETATM | 366 | H  | 0 | 4.011  | -18.203 | 3.073  |
| H      |     |    |   |        |         |        |
| HETATM | 367 | C  | 0 | 5.785  | -17.271 | 2.823  |
| C      |     |    |   |        |         |        |
| HETATM | 368 | H  | 0 | 6.282  | -17.815 | 3.423  |
| H      |     |    |   |        |         |        |
| HETATM | 369 | C  | 0 | 6.395  | -16.233 | 2.142  |
| C      |     |    |   |        |         |        |
| HETATM | 370 | H  | 0 | 7.316  | -16.041 | 2.274  |
| H      |     |    |   |        |         |        |
| HETATM | 371 | C  | 0 | 5.633  | -15.476 | 1.259  |
| C      |     |    |   |        |         |        |
| HETATM | 372 | C  | 0 | 6.117  | -14.354 | 0.490  |
| C      |     |    |   |        |         |        |
| HETATM | 373 | C  | 0 | 7.120  | -12.526 | -0.652 |
| C      |     |    |   |        |         |        |
| HETATM | 374 | C  | 0 | 8.013  | -11.501 | -1.209 |
| C      |     |    |   |        |         |        |
| HETATM | 375 | C  | 0 | 7.489  | -10.429 | -1.966 |
| C      |     |    |   |        |         |        |
| HETATM | 376 | H  | 0 | 6.550  | -10.358 | -2.089 |
| H      |     |    |   |        |         |        |
| HETATM | 377 | C  | 0 | 8.305  | -9.503  | -2.518 |
| C      |     |    |   |        |         |        |
| HETATM | 378 | H  | 0 | 7.932  | -8.785  | -3.016 |
| H      |     |    |   |        |         |        |
| HETATM | 379 | C  | 0 | 9.716  | -9.587  | -2.367 |
| C      |     |    |   |        |         |        |
| HETATM | 380 | C  | 0 | 10.604 | -8.658  | -2.948 |
| C      |     |    |   |        |         |        |

|        |     |   |   |        |         |        |
|--------|-----|---|---|--------|---------|--------|
| HETATM | 381 | H | 0 | 10.257 | -7.935  | -3.456 |
| H      |     |   |   |        |         |        |
| HETATM | 382 | C | 0 | 11.960 | -8.785  | -2.790 |
| C      |     |   |   |        |         |        |
| HETATM | 383 | H | 0 | 12.542 | -8.147  | -3.189 |
| H      |     |   |   |        |         |        |
| HETATM | 384 | C | 0 | 12.499 | -9.851  | -2.040 |
| C      |     |   |   |        |         |        |
| HETATM | 385 | H | 0 | 13.440 | -9.929  | -1.936 |
| H      |     |   |   |        |         |        |
| HETATM | 386 | C | 0 | 11.670 | -10.769 | -1.467 |
| C      |     |   |   |        |         |        |
| HETATM | 387 | H | 0 | 12.039 | -11.484 | -0.964 |
| H      |     |   |   |        |         |        |
| HETATM | 388 | C | 0 | 10.258 | -10.667 | -1.613 |
| C      |     |   |   |        |         |        |
| HETATM | 389 | C | 0 | 9.379  | -11.605 | -1.044 |
| C      |     |   |   |        |         |        |
| HETATM | 390 | H | 0 | 9.734  | -12.324 | -0.534 |
| H      |     |   |   |        |         |        |
| HETATM | 391 | C | 0 | 2.679  | -12.694 | 2.049  |
| C      |     |   |   |        |         |        |
| HETATM | 392 | S | 0 | -0.817 | -15.295 | -1.143 |
| S      |     |   |   |        |         |        |
| HETATM | 393 | S | 0 | 4.575  | -17.195 | -4.056 |
| S      |     |   |   |        |         |        |
| HETATM | 394 | N | 0 | 2.584  | -13.289 | -1.698 |
| N      |     |   |   |        |         |        |
| HETATM | 395 | N | 0 | 1.607  | -15.292 | -0.366 |
| N      |     |   |   |        |         |        |
| HETATM | 396 | N | 0 | 1.036  | -16.355 | 0.283  |
| N      |     |   |   |        |         |        |
| HETATM | 397 | N | 0 | 3.971  | -15.685 | -1.779 |
| N      |     |   |   |        |         |        |
| HETATM | 398 | C | 0 | 3.153  | -12.311 | -2.389 |
| C      |     |   |   |        |         |        |
| HETATM | 399 | H | 0 | 4.082  | -12.151 | -2.276 |
| H      |     |   |   |        |         |        |
| HETATM | 400 | C | 0 | 2.440  | -11.509 | -3.271 |
| C      |     |   |   |        |         |        |
| HETATM | 401 | H | 0 | 2.880  | -10.803 | -3.732 |
| H      |     |   |   |        |         |        |
| HETATM | 402 | C | 0 | 1.106  | -11.736 | -3.482 |
| C      |     |   |   |        |         |        |
| HETATM | 403 | H | 0 | 0.611  | -11.191 | -4.082 |
| H      |     |   |   |        |         |        |
| HETATM | 404 | C | 0 | 0.497  | -12.772 | -2.801 |
| C      |     |   |   |        |         |        |
| HETATM | 405 | H | 0 | -0.424 | -12.966 | -2.933 |
| H      |     |   |   |        |         |        |
| HETATM | 406 | C | 0 | 1.258  | -13.530 | -1.918 |
| C      |     |   |   |        |         |        |
| HETATM | 407 | C | 0 | 0.775  | -14.652 | -1.149 |
| C      |     |   |   |        |         |        |
| HETATM | 408 | C | 0 | -0.227 | -16.479 | -0.007 |
| C      |     |   |   |        |         |        |

|        |     |    |   |        |         |        |
|--------|-----|----|---|--------|---------|--------|
| HETATM | 409 | C  | 0 | -1.122 | -17.506 | 0.550  |
| C      |     |    |   |        |         |        |
| HETATM | 410 | C  | 0 | -0.597 | -18.577 | 1.307  |
| C      |     |    |   |        |         |        |
| HETATM | 411 | H  | 0 | 0.342  | -18.648 | 1.430  |
| H      |     |    |   |        |         |        |
| HETATM | 412 | C  | 0 | -1.414 | -19.503 | 1.860  |
| C      |     |    |   |        |         |        |
| HETATM | 413 | H  | 0 | -1.039 | -20.222 | 2.357  |
| H      |     |    |   |        |         |        |
| HETATM | 414 | C  | 0 | -2.825 | -19.419 | 1.708  |
| C      |     |    |   |        |         |        |
| HETATM | 415 | C  | 0 | -3.712 | -20.348 | 2.289  |
| C      |     |    |   |        |         |        |
| HETATM | 416 | H  | 0 | -3.365 | -21.072 | 2.797  |
| H      |     |    |   |        |         |        |
| HETATM | 417 | C  | 0 | -5.069 | -20.222 | 2.131  |
| C      |     |    |   |        |         |        |
| HETATM | 418 | H  | 0 | -5.650 | -20.859 | 2.530  |
| H      |     |    |   |        |         |        |
| HETATM | 419 | C  | 0 | -5.608 | -19.156 | 1.381  |
| C      |     |    |   |        |         |        |
| HETATM | 420 | H  | 0 | -6.548 | -19.078 | 1.277  |
| H      |     |    |   |        |         |        |
| HETATM | 421 | C  | 0 | -4.777 | -18.238 | 0.808  |
| C      |     |    |   |        |         |        |
| HETATM | 422 | H  | 0 | -5.147 | -17.522 | 0.305  |
| H      |     |    |   |        |         |        |
| HETATM | 423 | C  | 0 | -3.366 | -18.339 | 0.954  |
| C      |     |    |   |        |         |        |
| HETATM | 424 | C  | 0 | -2.488 | -17.401 | 0.385  |
| C      |     |    |   |        |         |        |
| HETATM | 425 | H  | 0 | -2.842 | -16.682 | -0.125 |
| H      |     |    |   |        |         |        |
| HETATM | 426 | C  | 0 | 4.213  | -16.313 | -2.708 |
| C      |     |    |   |        |         |        |
| HETATM | 427 | Fe | 0 | 3.830  | 11.749  | 0.472  |
| Fe     |     |    |   |        |         |        |
| HETATM | 428 | S  | 0 | 8.092  | 12.541  | 1.286  |
| S      |     |    |   |        |         |        |
| HETATM | 429 | S  | 0 | 2.700  | 14.441  | 4.197  |
| S      |     |    |   |        |         |        |
| HETATM | 430 | N  | 0 | 4.692  | 10.534  | 1.840  |
| N      |     |    |   |        |         |        |
| HETATM | 431 | N  | 0 | 5.668  | 12.537  | 0.508  |
| N      |     |    |   |        |         |        |
| HETATM | 432 | N  | 0 | 6.239  | 13.599  | -0.140 |
| N      |     |    |   |        |         |        |
| HETATM | 433 | N  | 0 | 3.305  | 12.931  | 1.921  |
| N      |     |    |   |        |         |        |
| HETATM | 434 | C  | 0 | 4.123  | 9.555   | 2.531  |
| C      |     |    |   |        |         |        |
| HETATM | 435 | H  | 0 | 3.193  | 9.397   | 2.419  |
| H      |     |    |   |        |         |        |
| HETATM | 436 | C  | 0 | 4.835  | 8.755   | 3.414  |
| C      |     |    |   |        |         |        |



|        |     |   |   |        |        |        |
|--------|-----|---|---|--------|--------|--------|
| HETATM | 437 | H | 0 | 4.395  | 8.049  | 3.873  |
| H      |     |   |   |        |        |        |
| HETATM | 438 | C | 0 | 6.169  | 8.981  | 3.625  |
| C      |     |   |   |        |        |        |
| HETATM | 439 | H | 0 | 6.665  | 8.437  | 4.224  |
| H      |     |   |   |        |        |        |
| HETATM | 440 | C | 0 | 6.778  | 10.018 | 2.943  |
| C      |     |   |   |        |        |        |
| HETATM | 441 | H | 0 | 7.699  | 10.210 | 3.076  |
| H      |     |   |   |        |        |        |
| HETATM | 442 | C | 0 | 6.017  | 10.776 | 2.060  |
| C      |     |   |   |        |        |        |
| HETATM | 443 | C | 0 | 6.501  | 11.898 | 1.291  |
| C      |     |   |   |        |        |        |
| HETATM | 444 | C | 0 | 7.503  | 13.725 | 0.150  |
| C      |     |   |   |        |        |        |
| HETATM | 445 | C | 0 | 8.397  | 14.750 | -0.408 |
| C      |     |   |   |        |        |        |
| HETATM | 446 | C | 0 | 7.873  | 15.823 | -1.165 |
| C      |     |   |   |        |        |        |
| HETATM | 447 | H | 0 | 6.933  | 15.894 | -1.288 |
| H      |     |   |   |        |        |        |
| HETATM | 448 | C | 0 | 8.689  | 16.749 | -1.718 |
| C      |     |   |   |        |        |        |
| HETATM | 449 | H | 0 | 8.314  | 17.467 | -2.214 |
| H      |     |   |   |        |        |        |
| HETATM | 450 | C | 0 | 10.100 | 16.664 | -1.566 |
| C      |     |   |   |        |        |        |
| HETATM | 451 | C | 0 | 10.988 | 17.594 | -2.147 |
| C      |     |   |   |        |        |        |
| HETATM | 452 | H | 0 | 10.641 | 18.318 | -2.655 |
| H      |     |   |   |        |        |        |
| HETATM | 453 | C | 0 | 12.344 | 17.467 | -1.988 |
| C      |     |   |   |        |        |        |
| HETATM | 454 | H | 0 | 12.926 | 18.105 | -2.387 |
| H      |     |   |   |        |        |        |
| HETATM | 455 | C | 0 | 12.883 | 16.401 | -1.240 |
| C      |     |   |   |        |        |        |
| HETATM | 456 | H | 0 | 13.824 | 16.323 | -1.134 |
| H      |     |   |   |        |        |        |
| HETATM | 457 | C | 0 | 12.053 | 15.484 | -0.666 |
| C      |     |   |   |        |        |        |
| HETATM | 458 | H | 0 | 12.422 | 14.768 | -0.163 |
| H      |     |   |   |        |        |        |
| HETATM | 459 | C | 0 | 10.641 | 15.584 | -0.813 |
| C      |     |   |   |        |        |        |
| HETATM | 460 | C | 0 | 9.763  | 14.647 | -0.242 |
| C      |     |   |   |        |        |        |
| HETATM | 461 | H | 0 | 10.117 | 13.927 | 0.267  |
| H      |     |   |   |        |        |        |
| HETATM | 462 | C | 0 | 3.062  | 13.559 | 2.849  |
| C      |     |   |   |        |        |        |
| HETATM | 463 | S | 0 | -0.433 | 10.956 | -0.342 |
| S      |     |   |   |        |        |        |
| HETATM | 464 | S | 0 | 4.959  | 9.056  | -3.254 |
| S      |     |   |   |        |        |        |

|        |     |   |   |        |        |        |
|--------|-----|---|---|--------|--------|--------|
| HETATM | 465 | N | 0 | 2.968  | 12.964 | -0.897 |
| N      |     |   |   |        |        |        |
| HETATM | 466 | N | 0 | 1.991  | 10.960 | 0.435  |
| N      |     |   |   |        |        |        |
| HETATM | 467 | N | 0 | 1.420  | 9.898  | 1.083  |
| N      |     |   |   |        |        |        |
| HETATM | 468 | N | 0 | 4.355  | 10.567 | -0.978 |
| N      |     |   |   |        |        |        |
| HETATM | 469 | C | 0 | 3.537  | 13.942 | -1.587 |
| C      |     |   |   |        |        |        |
| HETATM | 470 | H | 0 | 4.466  | 14.101 | -1.475 |
| H      |     |   |   |        |        |        |
| HETATM | 471 | C | 0 | 2.824  | 14.742 | -2.470 |
| C      |     |   |   |        |        |        |
| HETATM | 472 | H | 0 | 3.264  | 15.448 | -2.930 |
| H      |     |   |   |        |        |        |
| HETATM | 473 | C | 0 | 1.490  | 14.516 | -2.681 |
| C      |     |   |   |        |        |        |
| HETATM | 474 | H | 0 | 0.993  | 15.060 | -3.281 |
| H      |     |   |   |        |        |        |
| HETATM | 475 | C | 0 | 0.881  | 13.479 | -2.000 |
| C      |     |   |   |        |        |        |
| HETATM | 476 | H | 0 | -0.041 | 13.287 | -2.133 |
| H      |     |   |   |        |        |        |
| HETATM | 477 | C | 0 | 1.642  | 12.721 | -1.116 |
| C      |     |   |   |        |        |        |
| HETATM | 478 | C | 0 | 1.158  | 11.599 | -0.348 |
| C      |     |   |   |        |        |        |
| HETATM | 479 | C | 0 | 0.155  | 9.772  | 0.794  |
| C      |     |   |   |        |        |        |
| HETATM | 480 | C | 0 | -0.738 | 8.747  | 1.352  |
| C      |     |   |   |        |        |        |
| HETATM | 481 | C | 0 | -0.213 | 7.675  | 2.109  |
| C      |     |   |   |        |        |        |
| HETATM | 482 | H | 0 | 0.725  | 7.603  | 2.231  |
| H      |     |   |   |        |        |        |
| HETATM | 483 | C | 0 | -1.030 | 6.748  | 2.661  |
| C      |     |   |   |        |        |        |
| HETATM | 484 | H | 0 | -0.656 | 6.030  | 3.157  |
| H      |     |   |   |        |        |        |
| HETATM | 485 | C | 0 | -2.441 | 6.833  | 2.509  |
| C      |     |   |   |        |        |        |
| HETATM | 486 | C | 0 | -3.329 | 5.903  | 3.091  |
| C      |     |   |   |        |        |        |
| HETATM | 487 | H | 0 | -2.981 | 5.180  | 3.599  |
| H      |     |   |   |        |        |        |
| HETATM | 488 | C | 0 | -4.685 | 6.030  | 2.932  |
| C      |     |   |   |        |        |        |
| HETATM | 489 | H | 0 | -5.266 | 5.393  | 3.330  |
| H      |     |   |   |        |        |        |
| HETATM | 490 | C | 0 | -5.224 | 7.096  | 2.183  |
| C      |     |   |   |        |        |        |
| HETATM | 491 | H | 0 | -6.164 | 7.174  | 2.077  |
| H      |     |   |   |        |        |        |
| HETATM | 492 | C | 0 | -4.394 | 8.014  | 1.609  |
| C      |     |   |   |        |        |        |

|        |     |    |   |        |        |        |
|--------|-----|----|---|--------|--------|--------|
| HETATM | 493 | H  | 0 | -4.764 | 8.730  | 1.107  |
| H      |     |    |   |        |        |        |
| HETATM | 494 | C  | 0 | -2.982 | 7.913  | 1.756  |
| C      |     |    |   |        |        |        |
| HETATM | 495 | C  | 0 | -2.104 | 8.850  | 1.185  |
| C      |     |    |   |        |        |        |
| HETATM | 496 | H  | 0 | -2.459 | 9.570  | 0.676  |
| H      |     |    |   |        |        |        |
| HETATM | 497 | C  | 0 | 4.596  | 9.939  | -1.906 |
| C      |     |    |   |        |        |        |
| HETATM | 498 | Fe | 0 | 0.000  | 0.000  | 0.000  |
| Fe     |     |    |   |        |        |        |
| HETATM | 499 | S  | 0 | 4.334  | 0.821  | 0.853  |
| S      |     |    |   |        |        |        |
| HETATM | 500 | S  | 0 | -1.105 | 2.822  | 3.779  |
| S      |     |    |   |        |        |        |
| HETATM | 501 | N  | 0 | 0.869  | -1.278 | 1.305  |
| N      |     |    |   |        |        |        |
| HETATM | 502 | N  | 0 | 1.844  | 0.825  | 0.049  |
| N      |     |    |   |        |        |        |
| HETATM | 503 | N  | 0 | 2.426  | 1.914  | -0.610 |
| N      |     |    |   |        |        |        |
| HETATM | 504 | N  | 0 | -0.520 | 1.137  | 1.498  |
| N      |     |    |   |        |        |        |
| HETATM | 505 | C  | 0 | 0.290  | -2.340 | 1.920  |
| C      |     |    |   |        |        |        |
| HETATM | 506 | H  | 0 | -0.752 | -2.523 | 1.664  |
| H      |     |    |   |        |        |        |
| HETATM | 507 | C  | 0 | 0.997  | -3.148 | 2.843  |
| C      |     |    |   |        |        |        |
| HETATM | 508 | H  | 0 | 0.492  | -3.991 | 3.311  |
| H      |     |    |   |        |        |        |
| HETATM | 509 | C  | 0 | 2.344  | -2.845 | 3.143  |
| C      |     |    |   |        |        |        |
| HETATM | 510 | H  | 0 | 2.910  | -3.449 | 3.852  |
| H      |     |    |   |        |        |        |
| HETATM | 511 | C  | 0 | 2.953  | -1.738 | 2.508  |
| C      |     |    |   |        |        |        |
| HETATM | 512 | H  | 0 | 3.978  | -1.451 | 2.738  |
| H      |     |    |   |        |        |        |
| HETATM | 513 | C  | 0 | 2.179  | -0.992 | 1.594  |
| C      |     |    |   |        |        |        |
| HETATM | 514 | C  | 0 | 2.680  | 0.168  | 0.847  |
| C      |     |    |   |        |        |        |
| HETATM | 515 | C  | 0 | 3.712  | 2.062  | -0.316 |
| C      |     |    |   |        |        |        |
| HETATM | 516 | C  | 0 | 4.605  | 3.096  | -0.873 |
| C      |     |    |   |        |        |        |
| HETATM | 517 | C  | 0 | 4.061  | 4.199  | -1.632 |
| C      |     |    |   |        |        |        |
| HETATM | 518 | H  | 0 | 2.982  | 4.268  | -1.766 |
| H      |     |    |   |        |        |        |
| HETATM | 519 | C  | 0 | 4.915  | 5.149  | -2.186 |
| C      |     |    |   |        |        |        |
| HETATM | 520 | H  | 0 | 4.519  | 5.989  | -2.760 |
| H      |     |    |   |        |        |        |

|        |     |   |   |        |        |        |
|--------|-----|---|---|--------|--------|--------|
| HETATM | 521 | C | 0 | 6.348  | 5.036  | -2.032 |
| C      |     |   |   |        |        |        |
| HETATM | 522 | C | 0 | 7.258  | 5.982  | -2.626 |
| C      |     |   |   |        |        |        |
| HETATM | 523 | H | 0 | 6.847  | 6.810  | -3.205 |
| H      |     |   |   |        |        |        |
| HETATM | 524 | C | 0 | 8.637  | 5.847  | -2.444 |
| C      |     |   |   |        |        |        |
| HETATM | 525 | H | 0 | 9.330  | 6.550  | -2.908 |
| H      |     |   |   |        |        |        |
| HETATM | 526 | C | 0 | 9.171  | 4.762  | -1.662 |
| C      |     |   |   |        |        |        |
| HETATM | 527 | H | 0 | 10.253 | 4.683  | -1.548 |
| H      |     |   |   |        |        |        |
| HETATM | 528 | C | 0 | 8.315  | 3.826  | -1.082 |
| C      |     |   |   |        |        |        |
| HETATM | 529 | H | 0 | 8.706  | 2.986  | -0.507 |
| H      |     |   |   |        |        |        |
| HETATM | 530 | C | 0 | 6.888  | 3.944  | -1.254 |
| C      |     |   |   |        |        |        |
| HETATM | 531 | C | 0 | 5.988  | 2.993  | -0.677 |
| C      |     |   |   |        |        |        |
| HETATM | 532 | H | 0 | 6.413  | 2.176  | -0.090 |
| H      |     |   |   |        |        |        |
| HETATM | 533 | C | 0 | -0.745 | 1.826  | 2.438  |
| C      |     |   |   |        |        |        |
| HETATM | 534 | S | 0 | -4.334 | -0.820 | -0.854 |
| S      |     |   |   |        |        |        |
| HETATM | 535 | S | 0 | 1.104  | -2.822 | -3.779 |
| S      |     |   |   |        |        |        |
| HETATM | 536 | N | 0 | -0.869 | 1.279  | -1.305 |
| N      |     |   |   |        |        |        |
| HETATM | 537 | N | 0 | -1.844 | -0.824 | -0.049 |
| N      |     |   |   |        |        |        |
| HETATM | 538 | N | 0 | -2.426 | -1.914 | 0.610  |
| N      |     |   |   |        |        |        |
| HETATM | 539 | N | 0 | 0.520  | -1.136 | -1.498 |
| N      |     |   |   |        |        |        |
| HETATM | 540 | C | 0 | -0.290 | 2.341  | -1.920 |
| C      |     |   |   |        |        |        |
| HETATM | 541 | H | 0 | 0.751  | 2.524  | -1.664 |
| H      |     |   |   |        |        |        |
| HETATM | 542 | C | 0 | -0.998 | 3.148  | -2.843 |
| C      |     |   |   |        |        |        |
| HETATM | 543 | H | 0 | -0.492 | 3.992  | -3.311 |
| H      |     |   |   |        |        |        |
| HETATM | 544 | C | 0 | -2.344 | 2.845  | -3.143 |
| C      |     |   |   |        |        |        |
| HETATM | 545 | H | 0 | -2.910 | 3.449  | -3.852 |
| H      |     |   |   |        |        |        |
| HETATM | 546 | C | 0 | -2.953 | 1.737  | -2.508 |
| C      |     |   |   |        |        |        |
| HETATM | 547 | H | 0 | -3.977 | 1.450  | -2.739 |
| H      |     |   |   |        |        |        |
| HETATM | 548 | C | 0 | -2.178 | 0.992  | -1.594 |
| C      |     |   |   |        |        |        |

|        |     |    |   |         |         |        |
|--------|-----|----|---|---------|---------|--------|
| HETATM | 549 | C  | 0 | -2.680  | -0.168  | -0.847 |
| C      |     |    |   |         |         |        |
| HETATM | 550 | C  | 0 | -3.711  | -2.061  | 0.316  |
| C      |     |    |   |         |         |        |
| HETATM | 551 | C  | 0 | -4.605  | -3.096  | 0.873  |
| C      |     |    |   |         |         |        |
| HETATM | 552 | C  | 0 | -4.061  | -4.198  | 1.632  |
| C      |     |    |   |         |         |        |
| HETATM | 553 | H  | 0 | -2.982  | -4.268  | 1.767  |
| H      |     |    |   |         |         |        |
| HETATM | 554 | C  | 0 | -4.916  | -5.148  | 2.185  |
| C      |     |    |   |         |         |        |
| HETATM | 555 | H  | 0 | -4.520  | -5.988  | 2.760  |
| H      |     |    |   |         |         |        |
| HETATM | 556 | C  | 0 | -6.348  | -5.035  | 2.031  |
| C      |     |    |   |         |         |        |
| HETATM | 557 | C  | 0 | -7.258  | -5.981  | 2.626  |
| C      |     |    |   |         |         |        |
| HETATM | 558 | H  | 0 | -6.849  | -6.809  | 3.204  |
| H      |     |    |   |         |         |        |
| HETATM | 559 | C  | 0 | -8.637  | -5.846  | 2.443  |
| C      |     |    |   |         |         |        |
| HETATM | 560 | H  | 0 | -9.331  | -6.549  | 2.906  |
| H      |     |    |   |         |         |        |
| HETATM | 561 | C  | 0 | -9.171  | -4.761  | 1.660  |
| C      |     |    |   |         |         |        |
| HETATM | 562 | H  | 0 | -10.253 | -4.682  | 1.546  |
| H      |     |    |   |         |         |        |
| HETATM | 563 | C  | 0 | -8.315  | -3.825  | 1.081  |
| C      |     |    |   |         |         |        |
| HETATM | 564 | H  | 0 | -8.706  | -2.984  | 0.505  |
| H      |     |    |   |         |         |        |
| HETATM | 565 | C  | 0 | -6.888  | -3.943  | 1.254  |
| C      |     |    |   |         |         |        |
| HETATM | 566 | C  | 0 | -5.988  | -2.992  | 0.676  |
| C      |     |    |   |         |         |        |
| HETATM | 567 | H  | 0 | -6.413  | -2.175  | 0.090  |
| H      |     |    |   |         |         |        |
| HETATM | 568 | C  | 0 | 0.745   | -1.826  | -2.438 |
| C      |     |    |   |         |         |        |
| HETATM | 569 | Fe | 0 | -3.830  | -11.749 | -0.472 |
| Fe     |     |    |   |         |         |        |
| HETATM | 570 | S  | 0 | 0.433   | -10.956 | 0.342  |
| S      |     |    |   |         |         |        |
| HETATM | 571 | S  | 0 | -4.959  | -9.056  | 3.254  |
| S      |     |    |   |         |         |        |
| HETATM | 572 | N  | 0 | -2.968  | -12.964 | 0.897  |
| N      |     |    |   |         |         |        |
| HETATM | 573 | N  | 0 | -1.991  | -10.960 | -0.435 |
| N      |     |    |   |         |         |        |
| HETATM | 574 | N  | 0 | -1.420  | -9.898  | -1.083 |
| N      |     |    |   |         |         |        |
| HETATM | 575 | N  | 0 | -4.355  | -10.567 | 0.978  |
| N      |     |    |   |         |         |        |
| HETATM | 576 | C  | 0 | -3.537  | -13.942 | 1.587  |
| C      |     |    |   |         |         |        |

|        |     |   |   |        |         |        |
|--------|-----|---|---|--------|---------|--------|
| HETATM | 577 | H | 0 | -4.466 | -14.101 | 1.475  |
| H      |     |   |   |        |         |        |
| HETATM | 578 | C | 0 | -2.824 | -14.742 | 2.470  |
| C      |     |   |   |        |         |        |
| HETATM | 579 | H | 0 | -3.264 | -15.448 | 2.930  |
| H      |     |   |   |        |         |        |
| HETATM | 580 | C | 0 | -1.490 | -14.516 | 2.681  |
| C      |     |   |   |        |         |        |
| HETATM | 581 | H | 0 | -0.993 | -15.060 | 3.281  |
| H      |     |   |   |        |         |        |
| HETATM | 582 | C | 0 | -0.881 | -13.479 | 2.000  |
| C      |     |   |   |        |         |        |
| HETATM | 583 | H | 0 | 0.041  | -13.287 | 2.133  |
| H      |     |   |   |        |         |        |
| HETATM | 584 | C | 0 | -1.642 | -12.721 | 1.116  |
| C      |     |   |   |        |         |        |
| HETATM | 585 | C | 0 | -1.158 | -11.599 | 0.348  |
| C      |     |   |   |        |         |        |
| HETATM | 586 | C | 0 | -0.155 | -9.772  | -0.794 |
| C      |     |   |   |        |         |        |
| HETATM | 587 | C | 0 | 0.738  | -8.747  | -1.352 |
| C      |     |   |   |        |         |        |
| HETATM | 588 | C | 0 | 0.213  | -7.675  | -2.108 |
| C      |     |   |   |        |         |        |
| HETATM | 589 | H | 0 | -0.725 | -7.603  | -2.231 |
| H      |     |   |   |        |         |        |
| HETATM | 590 | C | 0 | 1.030  | -6.748  | -2.661 |
| C      |     |   |   |        |         |        |
| HETATM | 591 | H | 0 | 0.656  | -6.030  | -3.157 |
| H      |     |   |   |        |         |        |
| HETATM | 592 | C | 0 | 2.441  | -6.833  | -2.509 |
| C      |     |   |   |        |         |        |
| HETATM | 593 | C | 0 | 3.329  | -5.903  | -3.091 |
| C      |     |   |   |        |         |        |
| HETATM | 594 | H | 0 | 2.981  | -5.180  | -3.599 |
| H      |     |   |   |        |         |        |
| HETATM | 595 | C | 0 | 4.685  | -6.030  | -2.932 |
| C      |     |   |   |        |         |        |
| HETATM | 596 | H | 0 | 5.266  | -5.393  | -3.330 |
| H      |     |   |   |        |         |        |
| HETATM | 597 | C | 0 | 5.224  | -7.096  | -2.183 |
| C      |     |   |   |        |         |        |
| HETATM | 598 | H | 0 | 6.164  | -7.174  | -2.077 |
| H      |     |   |   |        |         |        |
| HETATM | 599 | C | 0 | 4.394  | -8.014  | -1.609 |
| C      |     |   |   |        |         |        |
| HETATM | 600 | H | 0 | 4.764  | -8.730  | -1.107 |
| H      |     |   |   |        |         |        |
| HETATM | 601 | C | 0 | 2.982  | -7.913  | -1.756 |
| C      |     |   |   |        |         |        |
| HETATM | 602 | C | 0 | 2.104  | -8.850  | -1.185 |
| C      |     |   |   |        |         |        |
| HETATM | 603 | H | 0 | 2.459  | -9.570  | -0.676 |
| H      |     |   |   |        |         |        |
| HETATM | 604 | C | 0 | -4.596 | -9.939  | 1.906  |
| C      |     |   |   |        |         |        |

|        |     |   |   |         |         |        |
|--------|-----|---|---|---------|---------|--------|
| HETATM | 605 | S | 0 | -8.092  | -12.541 | -1.286 |
| S      |     |   |   |         |         |        |
| HETATM | 606 | S | 0 | -2.700  | -14.441 | -4.197 |
| S      |     |   |   |         |         |        |
| HETATM | 607 | N | 0 | -4.692  | -10.534 | -1.840 |
| N      |     |   |   |         |         |        |
| HETATM | 608 | N | 0 | -5.668  | -12.537 | -0.508 |
| N      |     |   |   |         |         |        |
| HETATM | 609 | N | 0 | -6.239  | -13.599 | 0.140  |
| N      |     |   |   |         |         |        |
| HETATM | 610 | N | 0 | -3.305  | -12.931 | -1.921 |
| N      |     |   |   |         |         |        |
| HETATM | 611 | C | 0 | -4.123  | -9.555  | -2.531 |
| C      |     |   |   |         |         |        |
| HETATM | 612 | H | 0 | -3.193  | -9.397  | -2.419 |
| H      |     |   |   |         |         |        |
| HETATM | 613 | C | 0 | -4.835  | -8.755  | -3.414 |
| C      |     |   |   |         |         |        |
| HETATM | 614 | H | 0 | -4.395  | -8.049  | -3.873 |
| H      |     |   |   |         |         |        |
| HETATM | 615 | C | 0 | -6.169  | -8.981  | -3.625 |
| C      |     |   |   |         |         |        |
| HETATM | 616 | H | 0 | -6.665  | -8.437  | -4.224 |
| H      |     |   |   |         |         |        |
| HETATM | 617 | C | 0 | -6.778  | -10.018 | -2.943 |
| C      |     |   |   |         |         |        |
| HETATM | 618 | H | 0 | -7.699  | -10.210 | -3.076 |
| H      |     |   |   |         |         |        |
| HETATM | 619 | C | 0 | -6.017  | -10.776 | -2.060 |
| C      |     |   |   |         |         |        |
| HETATM | 620 | C | 0 | -6.501  | -11.898 | -1.291 |
| C      |     |   |   |         |         |        |
| HETATM | 621 | C | 0 | -7.503  | -13.725 | -0.150 |
| C      |     |   |   |         |         |        |
| HETATM | 622 | C | 0 | -8.397  | -14.750 | 0.408  |
| C      |     |   |   |         |         |        |
| HETATM | 623 | C | 0 | -7.873  | -15.823 | 1.165  |
| C      |     |   |   |         |         |        |
| HETATM | 624 | H | 0 | -6.933  | -15.894 | 1.288  |
| H      |     |   |   |         |         |        |
| HETATM | 625 | C | 0 | -8.689  | -16.749 | 1.718  |
| C      |     |   |   |         |         |        |
| HETATM | 626 | H | 0 | -8.314  | -17.467 | 2.214  |
| H      |     |   |   |         |         |        |
| HETATM | 627 | C | 0 | -10.100 | -16.664 | 1.566  |
| C      |     |   |   |         |         |        |
| HETATM | 628 | C | 0 | -10.988 | -17.594 | 2.147  |
| C      |     |   |   |         |         |        |
| HETATM | 629 | H | 0 | -10.641 | -18.318 | 2.655  |
| H      |     |   |   |         |         |        |
| HETATM | 630 | C | 0 | -12.344 | -17.468 | 1.988  |
| C      |     |   |   |         |         |        |
| HETATM | 631 | H | 0 | -12.926 | -18.105 | 2.387  |
| H      |     |   |   |         |         |        |
| HETATM | 632 | C | 0 | -12.883 | -16.402 | 1.240  |
| C      |     |   |   |         |         |        |

|        |     |    |   |         |         |        |
|--------|-----|----|---|---------|---------|--------|
| HETATM | 633 | H  | 0 | -13.824 | -16.323 | 1.134  |
| H      |     |    |   |         |         |        |
| HETATM | 634 | C  | 0 | -12.053 | -15.484 | 0.666  |
| C      |     |    |   |         |         |        |
| HETATM | 635 | H  | 0 | -12.422 | -14.768 | 0.163  |
| H      |     |    |   |         |         |        |
| HETATM | 636 | C  | 0 | -10.641 | -15.584 | 0.813  |
| C      |     |    |   |         |         |        |
| HETATM | 637 | C  | 0 | -9.763  | -14.647 | 0.242  |
| C      |     |    |   |         |         |        |
| HETATM | 638 | H  | 0 | -10.117 | -13.927 | -0.267 |
| H      |     |    |   |         |         |        |
| HETATM | 639 | C  | 0 | -3.062  | -13.559 | -2.849 |
| C      |     |    |   |         |         |        |
| HETATM | 640 | Fe | 0 | -3.446  | 14.503  | 0.330  |
| Fe     |     |    |   |         |         |        |
| HETATM | 641 | S  | 0 | 0.817   | 15.295  | 1.143  |
| S      |     |    |   |         |         |        |
| HETATM | 642 | S  | 0 | -4.575  | 17.195  | 4.056  |
| S      |     |    |   |         |         |        |
| HETATM | 643 | N  | 0 | -2.584  | 13.289  | 1.698  |
| N      |     |    |   |         |         |        |
| HETATM | 644 | N  | 0 | -1.607  | 15.292  | 0.366  |
| N      |     |    |   |         |         |        |
| HETATM | 645 | N  | 0 | -1.036  | 16.354  | -0.283 |
| N      |     |    |   |         |         |        |
| HETATM | 646 | N  | 0 | -3.971  | 15.685  | 1.779  |
| N      |     |    |   |         |         |        |
| HETATM | 647 | C  | 0 | -3.153  | 12.310  | 2.389  |
| C      |     |    |   |         |         |        |
| HETATM | 648 | H  | 0 | -4.082  | 12.151  | 2.276  |
| H      |     |    |   |         |         |        |
| HETATM | 649 | C  | 0 | -2.440  | 11.509  | 3.271  |
| C      |     |    |   |         |         |        |
| HETATM | 650 | H  | 0 | -2.880  | 10.803  | 3.732  |
| H      |     |    |   |         |         |        |
| HETATM | 651 | C  | 0 | -1.106  | 11.736  | 3.482  |
| C      |     |    |   |         |         |        |
| HETATM | 652 | H  | 0 | -0.611  | 11.191  | 4.082  |
| H      |     |    |   |         |         |        |
| HETATM | 653 | C  | 0 | -0.497  | 12.772  | 2.801  |
| C      |     |    |   |         |         |        |
| HETATM | 654 | H  | 0 | 0.424   | 12.966  | 2.933  |
| H      |     |    |   |         |         |        |
| HETATM | 655 | C  | 0 | -1.258  | 13.530  | 1.918  |
| C      |     |    |   |         |         |        |
| HETATM | 656 | C  | 0 | -0.775  | 14.652  | 1.149  |
| C      |     |    |   |         |         |        |
| HETATM | 657 | C  | 0 | 0.227   | 16.479  | 0.007  |
| C      |     |    |   |         |         |        |
| HETATM | 658 | C  | 0 | 1.122   | 17.505  | -0.550 |
| C      |     |    |   |         |         |        |
| HETATM | 659 | C  | 0 | 0.597   | 18.577  | -1.307 |
| C      |     |    |   |         |         |        |
| HETATM | 660 | H  | 0 | -0.342  | 18.648  | -1.430 |
| H      |     |    |   |         |         |        |



|        |     |   |   |        |        |        |
|--------|-----|---|---|--------|--------|--------|
| HETATM | 661 | C | 0 | 1.414  | 19.503 | -1.859 |
| C      |     |   |   |        |        |        |
| HETATM | 662 | H | 0 | 1.039  | 20.222 | -2.357 |
| H      |     |   |   |        |        |        |
| HETATM | 663 | C | 0 | 2.825  | 19.419 | -1.708 |
| C      |     |   |   |        |        |        |
| HETATM | 664 | C | 0 | 3.712  | 20.348 | -2.289 |
| C      |     |   |   |        |        |        |
| HETATM | 665 | H | 0 | 3.365  | 21.072 | -2.797 |
| H      |     |   |   |        |        |        |
| HETATM | 666 | C | 0 | 5.069  | 20.222 | -2.131 |
| C      |     |   |   |        |        |        |
| HETATM | 667 | H | 0 | 5.650  | 20.859 | -2.530 |
| H      |     |   |   |        |        |        |
| HETATM | 668 | C | 0 | 5.608  | 19.156 | -1.381 |
| C      |     |   |   |        |        |        |
| HETATM | 669 | H | 0 | 6.548  | 19.078 | -1.277 |
| H      |     |   |   |        |        |        |
| HETATM | 670 | C | 0 | 4.777  | 18.238 | -0.808 |
| C      |     |   |   |        |        |        |
| HETATM | 671 | H | 0 | 5.147  | 17.522 | -0.305 |
| H      |     |   |   |        |        |        |
| HETATM | 672 | C | 0 | 3.366  | 18.339 | -0.954 |
| C      |     |   |   |        |        |        |
| HETATM | 673 | C | 0 | 2.488  | 17.401 | -0.385 |
| C      |     |   |   |        |        |        |
| HETATM | 674 | H | 0 | 2.842  | 16.682 | 0.125  |
| H      |     |   |   |        |        |        |
| HETATM | 675 | C | 0 | -4.213 | 16.313 | 2.708  |
| C      |     |   |   |        |        |        |
| HETATM | 676 | S | 0 | -7.709 | 13.711 | -0.484 |
| S      |     |   |   |        |        |        |
| HETATM | 677 | S | 0 | -2.316 | 11.811 | -3.397 |
| S      |     |   |   |        |        |        |
| HETATM | 678 | N | 0 | -4.308 | 15.718 | -1.039 |
| N      |     |   |   |        |        |        |
| HETATM | 679 | N | 0 | -5.285 | 13.714 | 0.293  |
| N      |     |   |   |        |        |        |
| HETATM | 680 | N | 0 | -5.856 | 12.652 | 0.942  |
| N      |     |   |   |        |        |        |
| HETATM | 681 | N | 0 | -2.921 | 13.321 | -1.120 |
| N      |     |   |   |        |        |        |
| HETATM | 682 | C | 0 | -3.739 | 16.696 | -1.730 |
| C      |     |   |   |        |        |        |
| HETATM | 683 | H | 0 | -2.809 | 16.855 | -1.617 |
| H      |     |   |   |        |        |        |
| HETATM | 684 | C | 0 | -4.451 | 17.497 | -2.612 |
| C      |     |   |   |        |        |        |
| HETATM | 685 | H | 0 | -4.011 | 18.203 | -3.073 |
| H      |     |   |   |        |        |        |
| HETATM | 686 | C | 0 | -5.785 | 17.271 | -2.823 |
| C      |     |   |   |        |        |        |
| HETATM | 687 | H | 0 | -6.282 | 17.815 | -3.423 |
| H      |     |   |   |        |        |        |
| HETATM | 688 | C | 0 | -6.395 | 16.233 | -2.142 |
| C      |     |   |   |        |        |        |

|        |     |    |   |         |        |        |
|--------|-----|----|---|---------|--------|--------|
| HETATM | 689 | H  | 0 | -7.316  | 16.041 | -2.274 |
| H      |     |    |   |         |        |        |
| HETATM | 690 | C  | 0 | -5.633  | 15.476 | -1.259 |
| C      |     |    |   |         |        |        |
| HETATM | 691 | C  | 0 | -6.117  | 14.354 | -0.490 |
| C      |     |    |   |         |        |        |
| HETATM | 692 | C  | 0 | -7.120  | 12.526 | 0.652  |
| C      |     |    |   |         |        |        |
| HETATM | 693 | C  | 0 | -8.013  | 11.501 | 1.209  |
| C      |     |    |   |         |        |        |
| HETATM | 694 | C  | 0 | -7.488  | 10.429 | 1.966  |
| C      |     |    |   |         |        |        |
| HETATM | 695 | H  | 0 | -6.550  | 10.358 | 2.089  |
| H      |     |    |   |         |        |        |
| HETATM | 696 | C  | 0 | -8.305  | 9.503  | 2.519  |
| C      |     |    |   |         |        |        |
| HETATM | 697 | H  | 0 | -7.932  | 8.785  | 3.016  |
| H      |     |    |   |         |        |        |
| HETATM | 698 | C  | 0 | -9.716  | 9.587  | 2.367  |
| C      |     |    |   |         |        |        |
| HETATM | 699 | C  | 0 | -10.604 | 8.658  | 2.948  |
| C      |     |    |   |         |        |        |
| HETATM | 700 | H  | 0 | -10.257 | 7.935  | 3.456  |
| H      |     |    |   |         |        |        |
| HETATM | 701 | C  | 0 | -11.960 | 8.785  | 2.790  |
| C      |     |    |   |         |        |        |
| HETATM | 702 | H  | 0 | -12.542 | 8.147  | 3.189  |
| H      |     |    |   |         |        |        |
| HETATM | 703 | C  | 0 | -12.499 | 9.851  | 2.040  |
| C      |     |    |   |         |        |        |
| HETATM | 704 | H  | 0 | -13.440 | 9.929  | 1.936  |
| H      |     |    |   |         |        |        |
| HETATM | 705 | C  | 0 | -11.670 | 10.769 | 1.467  |
| C      |     |    |   |         |        |        |
| HETATM | 706 | H  | 0 | -12.039 | 11.484 | 0.964  |
| H      |     |    |   |         |        |        |
| HETATM | 707 | C  | 0 | -10.258 | 10.667 | 1.613  |
| C      |     |    |   |         |        |        |
| HETATM | 708 | C  | 0 | -9.379  | 11.605 | 1.044  |
| C      |     |    |   |         |        |        |
| HETATM | 709 | H  | 0 | -9.734  | 12.324 | 0.534  |
| H      |     |    |   |         |        |        |
| HETATM | 710 | C  | 0 | -2.679  | 12.693 | -2.049 |
| C      |     |    |   |         |        |        |
| HETATM | 711 | Fe | 0 | -7.275  | 2.754  | -0.142 |
| Fe     |     |    |   |         |        |        |
| HETATM | 712 | S  | 0 | -3.013  | 3.546  | 0.672  |
| S      |     |    |   |         |        |        |
| HETATM | 713 | S  | 0 | -8.404  | 5.448  | 3.584  |
| S      |     |    |   |         |        |        |
| HETATM | 714 | N  | 0 | -6.413  | 1.540  | 1.226  |
| N      |     |    |   |         |        |        |
| HETATM | 715 | N  | 0 | -5.436  | 3.543  | -0.106 |
| N      |     |    |   |         |        |        |
| HETATM | 716 | N  | 0 | -4.866  | 4.606  | -0.754 |
| N      |     |    |   |         |        |        |

|        |     |   |   |        |        |        |
|--------|-----|---|---|--------|--------|--------|
| HETATM | 717 | N | 0 | -7.801 | 3.937  | 1.307  |
| N      |     |   |   |        |        |        |
| HETATM | 718 | C | 0 | -6.982 | 0.562  | 1.917  |
| C      |     |   |   |        |        |        |
| HETATM | 719 | H | 0 | -7.913 | 0.402  | 1.805  |
| H      |     |   |   |        |        |        |
| HETATM | 720 | C | 0 | -6.271 | -0.240 | 2.800  |
| C      |     |   |   |        |        |        |
| HETATM | 721 | H | 0 | -6.709 | -0.946 | 3.259  |
| H      |     |   |   |        |        |        |
| HETATM | 722 | C | 0 | -4.937 | -0.013 | 3.010  |
| C      |     |   |   |        |        |        |
| HETATM | 723 | H | 0 | -4.440 | -0.557 | 3.611  |
| H      |     |   |   |        |        |        |
| HETATM | 724 | C | 0 | -4.326 | 1.025  | 2.329  |
| C      |     |   |   |        |        |        |
| HETATM | 725 | H | 0 | -3.406 | 1.217  | 2.462  |
| H      |     |   |   |        |        |        |
| HETATM | 726 | C | 0 | -5.087 | 1.782  | 1.447  |
| C      |     |   |   |        |        |        |
| HETATM | 727 | C | 0 | -4.604 | 2.904  | 0.677  |
| C      |     |   |   |        |        |        |
| HETATM | 728 | C | 0 | -3.602 | 4.731  | -0.464 |
| C      |     |   |   |        |        |        |
| HETATM | 729 | C | 0 | -2.707 | 5.757  | -1.022 |
| C      |     |   |   |        |        |        |
| HETATM | 730 | C | 0 | -3.232 | 6.829  | -1.779 |
| C      |     |   |   |        |        |        |
| HETATM | 731 | H | 0 | -4.171 | 6.900  | -1.902 |
| H      |     |   |   |        |        |        |
| HETATM | 732 | C | 0 | -2.416 | 7.755  | -2.331 |
| C      |     |   |   |        |        |        |
| HETATM | 733 | H | 0 | -2.790 | 8.473  | -2.828 |
| H      |     |   |   |        |        |        |
| HETATM | 734 | C | 0 | -1.004 | 7.670  | -2.179 |
| C      |     |   |   |        |        |        |
| HETATM | 735 | C | 0 | -0.117 | 8.599  | -2.761 |
| C      |     |   |   |        |        |        |
| HETATM | 736 | H | 0 | -0.464 | 9.323  | -3.269 |
| H      |     |   |   |        |        |        |
| HETATM | 737 | C | 0 | 1.239  | 8.473  | -2.602 |
| C      |     |   |   |        |        |        |
| HETATM | 738 | H | 0 | 1.821  | 9.110  | -3.001 |
| H      |     |   |   |        |        |        |
| HETATM | 739 | C | 0 | 1.778  | 7.408  | -1.854 |
| C      |     |   |   |        |        |        |
| HETATM | 740 | H | 0 | 2.719  | 7.330  | -1.748 |
| H      |     |   |   |        |        |        |
| HETATM | 741 | C | 0 | 0.948  | 6.489  | -1.280 |
| C      |     |   |   |        |        |        |
| HETATM | 742 | H | 0 | 1.318  | 5.774  | -0.777 |
| H      |     |   |   |        |        |        |
| HETATM | 743 | C | 0 | -0.464 | 6.591  | -1.427 |
| C      |     |   |   |        |        |        |
| HETATM | 744 | C | 0 | -1.342 | 5.652  | -0.856 |
| C      |     |   |   |        |        |        |

|        |     |   |   |         |        |        |
|--------|-----|---|---|---------|--------|--------|
| HETATM | 745 | H | 0 | -0.988  | 4.933  | -0.346 |
| H      |     |   |   |         |        |        |
| HETATM | 746 | C | 0 | -8.043  | 4.564  | 2.235  |
| C      |     |   |   |         |        |        |
| HETATM | 747 | S | 0 | -11.538 | 1.962  | -0.956 |
| S      |     |   |   |         |        |        |
| HETATM | 748 | S | 0 | -6.146  | 0.062  | -3.868 |
| S      |     |   |   |         |        |        |
| HETATM | 749 | N | 0 | -8.137  | 3.969  | -1.511 |
| N      |     |   |   |         |        |        |
| HETATM | 750 | N | 0 | -9.114  | 1.966  | -0.179 |
| N      |     |   |   |         |        |        |
| HETATM | 751 | N | 0 | -9.685  | 0.903  | 0.469  |
| N      |     |   |   |         |        |        |
| HETATM | 752 | N | 0 | -6.750  | 1.572  | -1.592 |
| N      |     |   |   |         |        |        |
| HETATM | 753 | C | 0 | -7.568  | 4.947  | -2.201 |
| C      |     |   |   |         |        |        |
| HETATM | 754 | H | 0 | -6.638  | 5.106  | -2.089 |
| H      |     |   |   |         |        |        |
| HETATM | 755 | C | 0 | -8.281  | 5.748  | -3.084 |
| C      |     |   |   |         |        |        |
| HETATM | 756 | H | 0 | -7.841  | 6.454  | -3.544 |
| H      |     |   |   |         |        |        |
| HETATM | 757 | C | 0 | -9.615  | 5.522  | -3.295 |
| C      |     |   |   |         |        |        |
| HETATM | 758 | H | 0 | -10.111 | 6.066  | -3.895 |
| H      |     |   |   |         |        |        |
| HETATM | 759 | C | 0 | -10.224 | 4.485  | -2.614 |
| C      |     |   |   |         |        |        |
| HETATM | 760 | H | 0 | -11.145 | 4.292  | -2.747 |
| H      |     |   |   |         |        |        |
| HETATM | 761 | C | 0 | -9.463  | 3.727  | -1.730 |
| C      |     |   |   |         |        |        |
| HETATM | 762 | C | 0 | -9.946  | 2.605  | -0.962 |
| C      |     |   |   |         |        |        |
| HETATM | 763 | C | 0 | -10.949 | 0.778  | 0.180  |
| C      |     |   |   |         |        |        |
| HETATM | 764 | C | 0 | -11.843 | -0.247 | 0.738  |
| C      |     |   |   |         |        |        |
| HETATM | 765 | C | 0 | -11.318 | -1.320 | 1.494  |
| C      |     |   |   |         |        |        |
| HETATM | 766 | H | 0 | -10.379 | -1.391 | 1.617  |
| H      |     |   |   |         |        |        |
| HETATM | 767 | C | 0 | -12.135 | -2.246 | 2.047  |
| C      |     |   |   |         |        |        |
| HETATM | 768 | H | 0 | -11.761 | -2.964 | 2.543  |
| H      |     |   |   |         |        |        |
| HETATM | 769 | C | 0 | -13.545 | -2.161 | 1.895  |
| C      |     |   |   |         |        |        |
| HETATM | 770 | C | 0 | -14.434 | -3.091 | 2.477  |
| C      |     |   |   |         |        |        |
| HETATM | 771 | H | 0 | -14.087 | -3.814 | 2.984  |
| H      |     |   |   |         |        |        |
| HETATM | 772 | C | 0 | -15.790 | -2.964 | 2.318  |
| C      |     |   |   |         |        |        |

|        |     |    |   |         |         |        |
|--------|-----|----|---|---------|---------|--------|
| HETATM | 773 | H  | 0 | -16.372 | -3.601  | 2.716  |
| H      |     |    |   |         |         |        |
| HETATM | 774 | C  | 0 | -16.328 | -1.898  | 1.569  |
| C      |     |    |   |         |         |        |
| HETATM | 775 | H  | 0 | -17.269 | -1.820  | 1.463  |
| H      |     |    |   |         |         |        |
| HETATM | 776 | C  | 0 | -15.499 | -0.980  | 0.995  |
| C      |     |    |   |         |         |        |
| HETATM | 777 | H  | 0 | -15.868 | -0.264  | 0.493  |
| H      |     |    |   |         |         |        |
| HETATM | 778 | C  | 0 | -14.087 | -1.082  | 1.142  |
| C      |     |    |   |         |         |        |
| HETATM | 779 | C  | 0 | -13.209 | -0.144  | 0.571  |
| C      |     |    |   |         |         |        |
| HETATM | 780 | H  | 0 | -13.563 | 0.576   | 0.062  |
| H      |     |    |   |         |         |        |
| HETATM | 781 | C  | 0 | -6.508  | 0.945   | -2.520 |
| C      |     |    |   |         |         |        |
| HETATM | 782 | Fe | 0 | -11.105 | -8.994  | -0.614 |
| Fe     |     |    |   |         |         |        |
| HETATM | 783 | S  | 0 | -6.842  | -8.202  | 0.200  |
| S      |     |    |   |         |         |        |
| HETATM | 784 | S  | 0 | -12.234 | -6.301  | 3.112  |
| S      |     |    |   |         |         |        |
| HETATM | 785 | N  | 0 | -10.243 | -10.209 | 0.755  |
| N      |     |    |   |         |         |        |
| HETATM | 786 | N  | 0 | -9.267  | -8.206  | -0.577 |
| N      |     |    |   |         |         |        |
| HETATM | 787 | N  | 0 | -8.695  | -7.143  | -1.225 |
| N      |     |    |   |         |         |        |
| HETATM | 788 | N  | 0 | -11.630 | -7.812  | 0.835  |
| N      |     |    |   |         |         |        |
| HETATM | 789 | C  | 0 | -10.811 | -11.187 | 1.445  |
| C      |     |    |   |         |         |        |
| HETATM | 790 | H  | 0 | -11.742 | -11.347 | 1.332  |
| H      |     |    |   |         |         |        |
| HETATM | 791 | C  | 0 | -10.100 | -11.988 | 2.328  |
| C      |     |    |   |         |         |        |
| HETATM | 792 | H  | 0 | -10.539 | -12.693 | 2.788  |
| H      |     |    |   |         |         |        |
| HETATM | 793 | C  | 0 | -8.766  | -11.761 | 2.539  |
| C      |     |    |   |         |         |        |
| HETATM | 794 | H  | 0 | -8.269  | -12.306 | 3.139  |
| H      |     |    |   |         |         |        |
| HETATM | 795 | C  | 0 | -8.156  | -10.724 | 1.858  |
| C      |     |    |   |         |         |        |
| HETATM | 796 | H  | 0 | -7.235  | -10.532 | 1.991  |
| H      |     |    |   |         |         |        |
| HETATM | 797 | C  | 0 | -8.917  | -9.967  | 0.974  |
| C      |     |    |   |         |         |        |
| HETATM | 798 | C  | 0 | -8.434  | -8.845  | 0.205  |
| C      |     |    |   |         |         |        |
| HETATM | 799 | C  | 0 | -7.431  | -7.017  | -0.937 |
| C      |     |    |   |         |         |        |
| HETATM | 800 | C  | 0 | -6.537  | -5.992  | -1.494 |
| C      |     |    |   |         |         |        |

|        |     |   |   |         |         |        |
|--------|-----|---|---|---------|---------|--------|
| HETATM | 801 | C | 0 | -7.063  | -4.920  | -2.251 |
| C      |     |   |   |         |         |        |
| HETATM | 802 | H | 0 | -8.001  | -4.848  | -2.374 |
| H      |     |   |   |         |         |        |
| HETATM | 803 | C | 0 | -6.245  | -3.993  | -2.803 |
| C      |     |   |   |         |         |        |
| HETATM | 804 | H | 0 | -6.620  | -3.276  | -3.300 |
| H      |     |   |   |         |         |        |
| HETATM | 805 | C | 0 | -4.835  | -4.079  | -2.651 |
| C      |     |   |   |         |         |        |
| HETATM | 806 | C | 0 | -3.946  | -3.149  | -3.233 |
| C      |     |   |   |         |         |        |
| HETATM | 807 | H | 0 | -4.294  | -2.426  | -3.741 |
| H      |     |   |   |         |         |        |
| HETATM | 808 | C | 0 | -2.590  | -3.276  | -3.075 |
| C      |     |   |   |         |         |        |
| HETATM | 809 | H | 0 | -2.008  | -2.639  | -3.472 |
| H      |     |   |   |         |         |        |
| HETATM | 810 | C | 0 | -2.052  | -4.341  | -2.325 |
| C      |     |   |   |         |         |        |
| HETATM | 811 | H | 0 | -1.110  | -4.419  | -2.219 |
| H      |     |   |   |         |         |        |
| HETATM | 812 | C | 0 | -2.881  | -5.259  | -1.751 |
| C      |     |   |   |         |         |        |
| HETATM | 813 | H | 0 | -2.512  | -5.975  | -1.249 |
| H      |     |   |   |         |         |        |
| HETATM | 814 | C | 0 | -4.293  | -5.158  | -1.898 |
| C      |     |   |   |         |         |        |
| HETATM | 815 | C | 0 | -5.171  | -6.096  | -1.328 |
| C      |     |   |   |         |         |        |
| HETATM | 816 | H | 0 | -4.817  | -6.816  | -0.818 |
| H      |     |   |   |         |         |        |
| HETATM | 817 | C | 0 | -11.872 | -7.185  | 1.764  |
| C      |     |   |   |         |         |        |
| HETATM | 818 | S | 0 | -15.368 | -9.786  | -1.428 |
| S      |     |   |   |         |         |        |
| HETATM | 819 | S | 0 | -9.975  | -11.687 | -4.340 |
| S      |     |   |   |         |         |        |
| HETATM | 820 | N | 0 | -11.967 | -7.780  | -1.982 |
| N      |     |   |   |         |         |        |
| HETATM | 821 | N | 0 | -12.943 | -9.782  | -0.650 |
| N      |     |   |   |         |         |        |
| HETATM | 822 | N | 0 | -13.514 | -10.845 | -0.002 |
| N      |     |   |   |         |         |        |
| HETATM | 823 | N | 0 | -10.580 | -10.177 | -2.063 |
| N      |     |   |   |         |         |        |
| HETATM | 824 | C | 0 | -11.398 | -6.801  | -2.674 |
| C      |     |   |   |         |         |        |
| HETATM | 825 | H | 0 | -10.468 | -6.642  | -2.561 |
| H      |     |   |   |         |         |        |
| HETATM | 826 | C | 0 | -12.110 | -6.000  | -3.556 |
| C      |     |   |   |         |         |        |
| HETATM | 827 | H | 0 | -11.670 | -5.295  | -4.015 |
| H      |     |   |   |         |         |        |
| HETATM | 828 | C | 0 | -13.444 | -6.227  | -3.767 |
| C      |     |   |   |         |         |        |

|        |     |    |   |         |         |        |
|--------|-----|----|---|---------|---------|--------|
| HETATM | 829 | H  | 0 | -13.940 | -5.682  | -4.367 |
| H      |     |    |   |         |         |        |
| HETATM | 830 | C  | 0 | -14.054 | -7.264  | -3.085 |
| C      |     |    |   |         |         |        |
| HETATM | 831 | H  | 0 | -14.974 | -7.456  | -3.218 |
| H      |     |    |   |         |         |        |
| HETATM | 832 | C  | 0 | -13.293 | -8.021  | -2.203 |
| C      |     |    |   |         |         |        |
| HETATM | 833 | C  | 0 | -13.776 | -9.144  | -1.433 |
| C      |     |    |   |         |         |        |
| HETATM | 834 | C  | 0 | -14.778 | -10.971 | -0.292 |
| C      |     |    |   |         |         |        |
| HETATM | 835 | C  | 0 | -15.673 | -11.996 | 0.266  |
| C      |     |    |   |         |         |        |
| HETATM | 836 | C  | 0 | -15.147 | -13.069 | 1.023  |
| C      |     |    |   |         |         |        |
| HETATM | 837 | H  | 0 | -14.209 | -13.140 | 1.146  |
| H      |     |    |   |         |         |        |
| HETATM | 838 | C  | 0 | -15.964 | -13.995 | 1.576  |
| C      |     |    |   |         |         |        |
| HETATM | 839 | H  | 0 | -15.590 | -14.712 | 2.072  |
| H      |     |    |   |         |         |        |
| HETATM | 840 | C  | 0 | -17.375 | -13.910 | 1.423  |
| C      |     |    |   |         |         |        |
| HETATM | 841 | C  | 0 | -18.263 | -14.839 | 2.004  |
| C      |     |    |   |         |         |        |
| HETATM | 842 | H  | 0 | -17.916 | -15.563 | 2.513  |
| H      |     |    |   |         |         |        |
| HETATM | 843 | C  | 0 | -19.620 | -14.713 | 1.846  |
| C      |     |    |   |         |         |        |
| HETATM | 844 | H  | 0 | -20.202 | -15.350 | 2.245  |
| H      |     |    |   |         |         |        |
| HETATM | 845 | C  | 0 | -20.158 | -13.647 | 1.098  |
| C      |     |    |   |         |         |        |
| HETATM | 846 | H  | 0 | -21.099 | -13.569 | 0.992  |
| H      |     |    |   |         |         |        |
| HETATM | 847 | C  | 0 | -19.328 | -12.729 | 0.524  |
| C      |     |    |   |         |         |        |
| HETATM | 848 | H  | 0 | -19.698 | -12.013 | 0.021  |
| H      |     |    |   |         |         |        |
| HETATM | 849 | C  | 0 | -17.916 | -12.830 | 0.671  |
| C      |     |    |   |         |         |        |
| HETATM | 850 | C  | 0 | -17.039 | -11.893 | 0.100  |
| C      |     |    |   |         |         |        |
| HETATM | 851 | H  | 0 | -17.393 | -11.173 | -0.410 |
| H      |     |    |   |         |         |        |
| HETATM | 852 | C  | 0 | -10.338 | -10.804 | -2.992 |
| C      |     |    |   |         |         |        |
| HETATM | 853 | Fe | 0 | -10.721 | 17.258  | 0.187  |
| Fe     |     |    |   |         |         |        |
| HETATM | 854 | S  | 0 | -6.458  | 18.049  | 1.001  |
| S      |     |    |   |         |         |        |
| HETATM | 855 | S  | 0 | -11.851 | 19.950  | 3.914  |
| S      |     |    |   |         |         |        |
| HETATM | 856 | N  | 0 | -9.859  | 16.043  | 1.555  |
| N      |     |    |   |         |         |        |

|        |     |   |   |         |        |        |
|--------|-----|---|---|---------|--------|--------|
| HETATM | 857 | N | 0 | -8.882  | 18.046 | 0.223  |
| N      |     |   |   |         |        |        |
| HETATM | 858 | N | 0 | -8.311  | 19.109 | -0.425 |
| N      |     |   |   |         |        |        |
| HETATM | 859 | N | 0 | -11.246 | 18.440 | 1.637  |
| N      |     |   |   |         |        |        |
| HETATM | 860 | C | 0 | -10.428 | 15.065 | 2.247  |
| C      |     |   |   |         |        |        |
| HETATM | 861 | H | 0 | -11.358 | 14.906 | 2.134  |
| H      |     |   |   |         |        |        |
| HETATM | 862 | C | 0 | -9.716  | 14.263 | 3.129  |
| C      |     |   |   |         |        |        |
| HETATM | 863 | H | 0 | -10.156 | 13.558 | 3.589  |
| H      |     |   |   |         |        |        |
| HETATM | 864 | C | 0 | -8.382  | 14.490 | 3.340  |
| C      |     |   |   |         |        |        |
| HETATM | 865 | H | 0 | -7.885  | 13.946 | 3.940  |
| H      |     |   |   |         |        |        |
| HETATM | 866 | C | 0 | -7.773  | 15.527 | 2.659  |
| C      |     |   |   |         |        |        |
| HETATM | 867 | H | 0 | -6.851  | 15.720 | 2.791  |
| H      |     |   |   |         |        |        |
| HETATM | 868 | C | 0 | -8.534  | 16.284 | 1.776  |
| C      |     |   |   |         |        |        |
| HETATM | 869 | C | 0 | -8.050  | 17.406 | 1.007  |
| C      |     |   |   |         |        |        |
| HETATM | 870 | C | 0 | -7.047  | 19.234 | -0.135 |
| C      |     |   |   |         |        |        |
| HETATM | 871 | C | 0 | -6.153  | 20.260 | -0.692 |
| C      |     |   |   |         |        |        |
| HETATM | 872 | C | 0 | -6.679  | 21.332 | -1.449 |
| C      |     |   |   |         |        |        |
| HETATM | 873 | H | 0 | -7.617  | 21.403 | -1.572 |
| H      |     |   |   |         |        |        |
| HETATM | 874 | C | 0 | -5.862  | 22.258 | -2.002 |
| C      |     |   |   |         |        |        |
| HETATM | 875 | H | 0 | -6.235  | 22.976 | -2.499 |
| H      |     |   |   |         |        |        |
| HETATM | 876 | C | 0 | -4.451  | 22.174 | -1.850 |
| C      |     |   |   |         |        |        |
| HETATM | 877 | C | 0 | -3.562  | 23.102 | -2.431 |
| C      |     |   |   |         |        |        |
| HETATM | 878 | H | 0 | -3.910  | 23.826 | -2.939 |
| H      |     |   |   |         |        |        |
| HETATM | 879 | C | 0 | -2.206  | 22.976 | -2.273 |
| C      |     |   |   |         |        |        |
| HETATM | 880 | H | 0 | -1.624  | 23.613 | -2.672 |
| H      |     |   |   |         |        |        |
| HETATM | 881 | C | 0 | -1.668  | 21.910 | -1.524 |
| C      |     |   |   |         |        |        |
| HETATM | 882 | H | 0 | -0.728  | 21.832 | -1.419 |
| H      |     |   |   |         |        |        |
| HETATM | 883 | C | 0 | -2.497  | 20.992 | -0.951 |
| C      |     |   |   |         |        |        |
| HETATM | 884 | H | 0 | -2.128  | 20.276 | -0.447 |
| H      |     |   |   |         |        |        |



|        |     |   |   |         |        |        |
|--------|-----|---|---|---------|--------|--------|
| HETATM | 885 | C | 0 | -3.909  | 21.094 | -1.097 |
| C      |     |   |   |         |        |        |
| HETATM | 886 | C | 0 | -4.787  | 20.156 | -0.527 |
| C      |     |   |   |         |        |        |
| HETATM | 887 | H | 0 | -4.433  | 19.437 | -0.017 |
| H      |     |   |   |         |        |        |
| HETATM | 888 | C | 0 | -11.488 | 19.067 | 2.565  |
| C      |     |   |   |         |        |        |
| HETATM | 889 | S | 0 | -14.984 | 16.466 | -0.627 |
| S      |     |   |   |         |        |        |
| HETATM | 890 | S | 0 | -9.592  | 14.565 | -3.539 |
| S      |     |   |   |         |        |        |
| HETATM | 891 | N | 0 | -11.583 | 18.472 | -1.181 |
| N      |     |   |   |         |        |        |
| HETATM | 892 | N | 0 | -12.560 | 16.469 | 0.151  |
| N      |     |   |   |         |        |        |
| HETATM | 893 | N | 0 | -13.131 | 15.406 | 0.799  |
| N      |     |   |   |         |        |        |
| HETATM | 894 | N | 0 | -10.195 | 16.075 | -1.263 |
| N      |     |   |   |         |        |        |
| HETATM | 895 | C | 0 | -11.015 | 19.450 | -1.872 |
| C      |     |   |   |         |        |        |
| HETATM | 896 | H | 0 | -10.084 | 19.610 | -1.759 |
| H      |     |   |   |         |        |        |
| HETATM | 897 | C | 0 | -11.726 | 20.252 | -2.755 |
| C      |     |   |   |         |        |        |
| HETATM | 898 | H | 0 | -11.287 | 20.958 | -3.215 |
| H      |     |   |   |         |        |        |
| HETATM | 899 | C | 0 | -13.060 | 20.025 | -2.965 |
| C      |     |   |   |         |        |        |
| HETATM | 900 | H | 0 | -13.556 | 20.570 | -3.565 |
| H      |     |   |   |         |        |        |
| HETATM | 901 | C | 0 | -13.670 | 18.988 | -2.285 |
| C      |     |   |   |         |        |        |
| HETATM | 902 | H | 0 | -14.591 | 18.795 | -2.417 |
| H      |     |   |   |         |        |        |
| HETATM | 903 | C | 0 | -12.909 | 18.231 | -1.401 |
| C      |     |   |   |         |        |        |
| HETATM | 904 | C | 0 | -13.392 | 17.109 | -0.632 |
| C      |     |   |   |         |        |        |
| HETATM | 905 | C | 0 | -14.395 | 15.281 | 0.510  |
| C      |     |   |   |         |        |        |
| HETATM | 906 | C | 0 | -15.289 | 14.255 | 1.067  |
| C      |     |   |   |         |        |        |
| HETATM | 907 | C | 0 | -14.764 | 13.183 | 1.824  |
| C      |     |   |   |         |        |        |
| HETATM | 908 | H | 0 | -13.825 | 13.112 | 1.947  |
| H      |     |   |   |         |        |        |
| HETATM | 909 | C | 0 | -15.580 | 12.257 | 2.376  |
| C      |     |   |   |         |        |        |
| HETATM | 910 | H | 0 | -15.206 | 11.539 | 2.873  |
| H      |     |   |   |         |        |        |
| HETATM | 911 | C | 0 | -16.992 | 12.342 | 2.225  |
| C      |     |   |   |         |        |        |
| HETATM | 912 | C | 0 | -17.879 | 11.413 | 2.806  |
| C      |     |   |   |         |        |        |

|        |     |    |   |         |        |        |
|--------|-----|----|---|---------|--------|--------|
| HETATM | 913 | H  | 0 | -17.532 | 10.689 | 3.314  |
| H      |     |    |   |         |        |        |
| HETATM | 914 | C  | 0 | -19.236 | 11.539 | 2.648  |
| C      |     |    |   |         |        |        |
| HETATM | 915 | H  | 0 | -19.817 | 10.902 | 3.046  |
| H      |     |    |   |         |        |        |
| HETATM | 916 | C  | 0 | -19.774 | 12.605 | 1.898  |
| C      |     |    |   |         |        |        |
| HETATM | 917 | H  | 0 | -20.715 | 12.683 | 1.793  |
| H      |     |    |   |         |        |        |
| HETATM | 918 | C  | 0 | -18.944 | 13.523 | 1.325  |
| C      |     |    |   |         |        |        |
| HETATM | 919 | H  | 0 | -19.314 | 14.238 | 0.822  |
| H      |     |    |   |         |        |        |
| HETATM | 920 | C  | 0 | -17.532 | 13.421 | 1.471  |
| C      |     |    |   |         |        |        |
| HETATM | 921 | C  | 0 | -16.655 | 14.359 | 0.902  |
| C      |     |    |   |         |        |        |
| HETATM | 922 | H  | 0 | -17.009 | 15.078 | 0.392  |
| H      |     |    |   |         |        |        |
| HETATM | 923 | C  | 0 | -9.954  | 15.448 | -2.191 |
| C      |     |    |   |         |        |        |
| HETATM | 924 | Fe | 0 | -14.551 | 5.509  | -0.284 |
| Fe     |     |    |   |         |        |        |
| HETATM | 925 | S  | 0 | -10.288 | 6.301  | 0.530  |
| S      |     |    |   |         |        |        |
| HETATM | 926 | S  | 0 | -15.680 | 8.202  | 3.441  |
| S      |     |    |   |         |        |        |
| HETATM | 927 | N  | 0 | -13.689 | 4.294  | 1.084  |
| N      |     |    |   |         |        |        |
| HETATM | 928 | N  | 0 | -12.712 | 6.297  | -0.248 |
| N      |     |    |   |         |        |        |
| HETATM | 929 | N  | 0 | -12.141 | 7.360  | -0.896 |
| N      |     |    |   |         |        |        |
| HETATM | 930 | N  | 0 | -15.076 | 6.691  | 1.165  |
| N      |     |    |   |         |        |        |
| HETATM | 931 | C  | 0 | -14.258 | 3.316  | 1.775  |
| C      |     |    |   |         |        |        |
| HETATM | 932 | H  | 0 | -15.187 | 3.157  | 1.663  |
| H      |     |    |   |         |        |        |
| HETATM | 933 | C  | 0 | -13.545 | 2.514  | 2.658  |
| C      |     |    |   |         |        |        |
| HETATM | 934 | H  | 0 | -13.985 | 1.809  | 3.117  |
| H      |     |    |   |         |        |        |
| HETATM | 935 | C  | 0 | -12.211 | 2.741  | 2.868  |
| C      |     |    |   |         |        |        |
| HETATM | 936 | H  | 0 | -11.714 | 2.198  | 3.468  |
| H      |     |    |   |         |        |        |
| HETATM | 937 | C  | 0 | -11.602 | 3.779  | 2.187  |
| C      |     |    |   |         |        |        |
| HETATM | 938 | H  | 0 | -10.681 | 3.971  | 2.320  |
| H      |     |    |   |         |        |        |
| HETATM | 939 | C  | 0 | -12.363 | 4.536  | 1.304  |
| C      |     |    |   |         |        |        |
| HETATM | 940 | C  | 0 | -11.879 | 5.659  | 0.535  |
| C      |     |    |   |         |        |        |

|        |     |   |   |         |        |        |
|--------|-----|---|---|---------|--------|--------|
| HETATM | 941 | C | 0 | -10.876 | 7.486  | -0.606 |
| C      |     |   |   |         |        |        |
| HETATM | 942 | C | 0 | -9.983  | 8.511  | -1.164 |
| C      |     |   |   |         |        |        |
| HETATM | 943 | C | 0 | -10.508 | 9.583  | -1.922 |
| C      |     |   |   |         |        |        |
| HETATM | 944 | H | 0 | -11.446 | 9.655  | -2.044 |
| H      |     |   |   |         |        |        |
| HETATM | 945 | C | 0 | -9.691  | 10.510 | -2.473 |
| C      |     |   |   |         |        |        |
| HETATM | 946 | H | 0 | -10.065 | 11.227 | -2.970 |
| H      |     |   |   |         |        |        |
| HETATM | 947 | C | 0 | -8.280  | 10.425 | -2.322 |
| C      |     |   |   |         |        |        |
| HETATM | 948 | C | 0 | -7.393  | 11.354 | -2.903 |
| C      |     |   |   |         |        |        |
| HETATM | 949 | H | 0 | -7.740  | 12.077 | -3.412 |
| H      |     |   |   |         |        |        |
| HETATM | 950 | C | 0 | -6.036  | 11.227 | -2.745 |
| C      |     |   |   |         |        |        |
| HETATM | 951 | H | 0 | -5.455  | 11.865 | -3.143 |
| H      |     |   |   |         |        |        |
| HETATM | 952 | C | 0 | -5.497  | 10.162 | -1.996 |
| C      |     |   |   |         |        |        |
| HETATM | 953 | H | 0 | -4.557  | 10.084 | -1.890 |
| H      |     |   |   |         |        |        |
| HETATM | 954 | C | 0 | -6.327  | 9.243  | -1.422 |
| C      |     |   |   |         |        |        |
| HETATM | 955 | H | 0 | -5.957  | 8.528  | -0.920 |
| H      |     |   |   |         |        |        |
| HETATM | 956 | C | 0 | -7.739  | 9.345  | -1.569 |
| C      |     |   |   |         |        |        |
| HETATM | 957 | C | 0 | -8.617  | 8.407  | -0.998 |
| C      |     |   |   |         |        |        |
| HETATM | 958 | H | 0 | -8.262  | 7.688  | -0.489 |
| H      |     |   |   |         |        |        |
| HETATM | 959 | C | 0 | -15.317 | 7.319  | 2.093  |
| C      |     |   |   |         |        |        |
| HETATM | 960 | S | 0 | -18.813 | 4.717  | -1.098 |
| S      |     |   |   |         |        |        |
| HETATM | 961 | S | 0 | -13.421 | 2.816  | -4.010 |
| S      |     |   |   |         |        |        |
| HETATM | 962 | N | 0 | -15.413 | 6.723  | -1.653 |
| N      |     |   |   |         |        |        |
| HETATM | 963 | N | 0 | -16.390 | 4.720  | -0.321 |
| N      |     |   |   |         |        |        |
| HETATM | 964 | N | 0 | -16.961 | 3.658  | 0.327  |
| N      |     |   |   |         |        |        |
| HETATM | 965 | N | 0 | -14.026 | 4.326  | -1.734 |
| N      |     |   |   |         |        |        |
| HETATM | 966 | C | 0 | -14.844 | 7.701  | -2.344 |
| C      |     |   |   |         |        |        |
| HETATM | 967 | H | 0 | -13.914 | 7.861  | -2.231 |
| H      |     |   |   |         |        |        |
| HETATM | 968 | C | 0 | -15.556 | 8.503  | -3.226 |
| C      |     |   |   |         |        |        |

|        |     |    |   |         |        |        |
|--------|-----|----|---|---------|--------|--------|
| HETATM | 969 | H  | 0 | -15.116 | 9.209  | -3.686 |
| H      |     |    |   |         |        |        |
| HETATM | 970 | C  | 0 | -16.890 | 8.276  | -3.438 |
| C      |     |    |   |         |        |        |
| HETATM | 971 | H  | 0 | -17.386 | 8.821  | -4.037 |
| H      |     |    |   |         |        |        |
| HETATM | 972 | C  | 0 | -17.499 | 7.239  | -2.756 |
| C      |     |    |   |         |        |        |
| HETATM | 973 | H  | 0 | -18.420 | 7.046  | -2.889 |
| H      |     |    |   |         |        |        |
| HETATM | 974 | C  | 0 | -16.738 | 6.482  | -1.872 |
| C      |     |    |   |         |        |        |
| HETATM | 975 | C  | 0 | -17.222 | 5.360  | -1.104 |
| C      |     |    |   |         |        |        |
| HETATM | 976 | C  | 0 | -18.224 | 3.533  | 0.038  |
| C      |     |    |   |         |        |        |
| HETATM | 977 | C  | 0 | -19.118 | 2.507  | 0.596  |
| C      |     |    |   |         |        |        |
| HETATM | 978 | C  | 0 | -18.594 | 1.435  | 1.352  |
| C      |     |    |   |         |        |        |
| HETATM | 979 | H  | 0 | -17.654 | 1.364  | 1.475  |
| H      |     |    |   |         |        |        |
| HETATM | 980 | C  | 0 | -19.410 | 0.509  | 1.905  |
| C      |     |    |   |         |        |        |
| HETATM | 981 | H  | 0 | -19.036 | -0.210 | 2.401  |
| H      |     |    |   |         |        |        |
| HETATM | 982 | C  | 0 | -20.821 | 0.594  | 1.753  |
| C      |     |    |   |         |        |        |
| HETATM | 983 | C  | 0 | -21.709 | -0.336 | 2.335  |
| C      |     |    |   |         |        |        |
| HETATM | 984 | H  | 0 | -21.362 | -1.060 | 2.842  |
| H      |     |    |   |         |        |        |
| HETATM | 985 | C  | 0 | -23.065 | -0.210 | 2.176  |
| C      |     |    |   |         |        |        |
| HETATM | 986 | H  | 0 | -23.647 | -0.847 | 2.574  |
| H      |     |    |   |         |        |        |
| HETATM | 987 | C  | 0 | -23.604 | 0.856  | 1.427  |
| C      |     |    |   |         |        |        |
| HETATM | 988 | H  | 0 | -24.545 | 0.934  | 1.321  |
| H      |     |    |   |         |        |        |
| HETATM | 989 | C  | 0 | -22.774 | 1.774  | 0.853  |
| C      |     |    |   |         |        |        |
| HETATM | 990 | H  | 0 | -23.143 | 2.490  | 0.350  |
| H      |     |    |   |         |        |        |
| HETATM | 991 | C  | 0 | -21.363 | 1.673  | 1.000  |
| C      |     |    |   |         |        |        |
| HETATM | 992 | C  | 0 | -20.484 | 2.611  | 0.429  |
| C      |     |    |   |         |        |        |
| HETATM | 993 | H  | 0 | -20.838 | 3.331  | -0.080 |
| H      |     |    |   |         |        |        |
| HETATM | 994 | C  | 0 | -13.783 | 3.699  | -2.662 |
| C      |     |    |   |         |        |        |
| HETATM | 995 | Fe | 0 | -18.380 | -6.240 | -0.757 |
| Fe     |     |    |   |         |        |        |
| HETATM | 996 | S  | 0 | -14.117 | -5.447 | 0.057  |
| S      |     |    |   |         |        |        |

|        |      |   |   |         |        |        |
|--------|------|---|---|---------|--------|--------|
| HETATM | 997  | S | 0 | -19.509 | -3.547 | 2.970  |
| S      |      |   |   |         |        |        |
| HETATM | 998  | N | 0 | -17.518 | -7.455 | 0.613  |
| N      |      |   |   |         |        |        |
| HETATM | 999  | N | 0 | -16.541 | -5.451 | -0.719 |
| N      |      |   |   |         |        |        |
| HETATM | 1000 | N | 0 | -15.970 | -4.389 | -1.368 |
| N      |      |   |   |         |        |        |
| HETATM | 1001 | N | 0 | -18.905 | -5.058 | 0.693  |
| N      |      |   |   |         |        |        |
| HETATM | 1002 | C | 0 | -18.087 | -8.433 | 1.303  |
| C      |      |   |   |         |        |        |
| HETATM | 1003 | H | 0 | -19.017 | -8.592 | 1.190  |
| H      |      |   |   |         |        |        |
| HETATM | 1004 | C | 0 | -17.374 | -9.233 | 2.185  |
| C      |      |   |   |         |        |        |
| HETATM | 1005 | H | 0 | -17.814 | -9.939 | 2.646  |
| H      |      |   |   |         |        |        |
| HETATM | 1006 | C | 0 | -16.040 | -9.007 | 2.397  |
| C      |      |   |   |         |        |        |
| HETATM | 1007 | H | 0 | -15.545 | -9.551 | 2.997  |
| H      |      |   |   |         |        |        |
| HETATM | 1008 | C | 0 | -15.431 | -7.970 | 1.715  |
| C      |      |   |   |         |        |        |
| HETATM | 1009 | H | 0 | -14.511 | -7.778 | 1.848  |
| H      |      |   |   |         |        |        |
| HETATM | 1010 | C | 0 | -16.192 | -7.212 | 0.832  |
| C      |      |   |   |         |        |        |
| HETATM | 1011 | C | 0 | -15.709 | -6.090 | 0.063  |
| C      |      |   |   |         |        |        |
| HETATM | 1012 | C | 0 | -14.707 | -4.263 | -1.079 |
| C      |      |   |   |         |        |        |
| HETATM | 1013 | C | 0 | -13.813 | -3.238 | -1.636 |
| C      |      |   |   |         |        |        |
| HETATM | 1014 | C | 0 | -14.337 | -2.166 | -2.393 |
| C      |      |   |   |         |        |        |
| HETATM | 1015 | H | 0 | -15.277 | -2.094 | -2.516 |
| H      |      |   |   |         |        |        |
| HETATM | 1016 | C | 0 | -13.520 | -1.239 | -2.945 |
| C      |      |   |   |         |        |        |
| HETATM | 1017 | H | 0 | -13.895 | -0.521 | -3.442 |
| H      |      |   |   |         |        |        |
| HETATM | 1018 | C | 0 | -12.109 | -1.324 | -2.793 |
| C      |      |   |   |         |        |        |
| HETATM | 1019 | C | 0 | -11.222 | -0.394 | -3.375 |
| C      |      |   |   |         |        |        |
| HETATM | 1020 | H | 0 | -11.569 | 0.329  | -3.883 |
| H      |      |   |   |         |        |        |
| HETATM | 1021 | C | 0 | -9.866  | -0.521 | -3.217 |
| C      |      |   |   |         |        |        |
| HETATM | 1022 | H | 0 | -9.284  | 0.116  | -3.615 |
| H      |      |   |   |         |        |        |
| HETATM | 1023 | C | 0 | -9.327  | -1.587 | -2.467 |
| C      |      |   |   |         |        |        |
| HETATM | 1024 | H | 0 | -8.386  | -1.665 | -2.361 |
| H      |      |   |   |         |        |        |

|        |      |   |   |         |         |        |
|--------|------|---|---|---------|---------|--------|
| HETATM | 1025 | C | 0 | -10.157 | -2.505  | -1.893 |
| C      |      |   |   |         |         |        |
| HETATM | 1026 | H | 0 | -9.788  | -3.220  | -1.391 |
| H      |      |   |   |         |         |        |
| HETATM | 1027 | C | 0 | -11.568 | -2.404  | -2.040 |
| C      |      |   |   |         |         |        |
| HETATM | 1028 | C | 0 | -12.446 | -3.341  | -1.470 |
| C      |      |   |   |         |         |        |
| HETATM | 1029 | H | 0 | -12.093 | -4.061  | -0.960 |
| H      |      |   |   |         |         |        |
| HETATM | 1030 | C | 0 | -19.148 | -4.430  | 1.622  |
| C      |      |   |   |         |         |        |
| HETATM | 1031 | S | 0 | -22.643 | -7.032  | -1.570 |
| S      |      |   |   |         |         |        |
| HETATM | 1032 | S | 0 | -17.251 | -8.933  | -4.482 |
| S      |      |   |   |         |         |        |
| HETATM | 1033 | N | 0 | -19.242 | -5.025  | -2.125 |
| N      |      |   |   |         |         |        |
| HETATM | 1034 | N | 0 | -20.219 | -7.028  | -0.793 |
| N      |      |   |   |         |         |        |
| HETATM | 1035 | N | 0 | -20.790 | -8.090  | -0.144 |
| N      |      |   |   |         |         |        |
| HETATM | 1036 | N | 0 | -17.855 | -7.423  | -2.205 |
| N      |      |   |   |         |         |        |
| HETATM | 1037 | C | 0 | -18.673 | -4.046  | -2.816 |
| C      |      |   |   |         |         |        |
| HETATM | 1038 | H | 0 | -17.743 | -3.888  | -2.703 |
| H      |      |   |   |         |         |        |
| HETATM | 1039 | C | 0 | -19.386 | -3.246  | -3.698 |
| C      |      |   |   |         |         |        |
| HETATM | 1040 | H | 0 | -18.946 | -2.540  | -4.158 |
| H      |      |   |   |         |         |        |
| HETATM | 1041 | C | 0 | -20.720 | -3.472  | -3.909 |
| C      |      |   |   |         |         |        |
| HETATM | 1042 | H | 0 | -21.216 | -2.928  | -4.509 |
| H      |      |   |   |         |         |        |
| HETATM | 1043 | C | 0 | -21.329 | -4.509  | -3.227 |
| C      |      |   |   |         |         |        |
| HETATM | 1044 | H | 0 | -22.250 | -4.701  | -3.360 |
| H      |      |   |   |         |         |        |
| HETATM | 1045 | C | 0 | -20.568 | -5.267  | -2.345 |
| C      |      |   |   |         |         |        |
| HETATM | 1046 | C | 0 | -21.051 | -6.389  | -1.575 |
| C      |      |   |   |         |         |        |
| HETATM | 1047 | C | 0 | -22.054 | -8.216  | -0.434 |
| C      |      |   |   |         |         |        |
| HETATM | 1048 | C | 0 | -22.947 | -9.241  | 0.123  |
| C      |      |   |   |         |         |        |
| HETATM | 1049 | C | 0 | -22.423 | -10.314 | 0.881  |
| C      |      |   |   |         |         |        |
| HETATM | 1050 | H | 0 | -21.484 | -10.385 | 1.004  |
| H      |      |   |   |         |         |        |
| HETATM | 1051 | C | 0 | -23.240 | -11.240 | 1.433  |
| C      |      |   |   |         |         |        |
| HETATM | 1052 | H | 0 | -22.866 | -11.958 | 1.930  |
| H      |      |   |   |         |         |        |

|        |      |   |   |         |         |        |
|--------|------|---|---|---------|---------|--------|
| HETATM | 1053 | C | 0 | -24.651 | -11.155 | 1.281  |
| C      |      |   |   |         |         |        |
| HETATM | 1054 | C | 0 | -25.538 | -12.085 | 1.862  |
| C      |      |   |   |         |         |        |
| HETATM | 1055 | H | 0 | -25.191 | -12.809 | 2.371  |
| H      |      |   |   |         |         |        |
| HETATM | 1056 | C | 0 | -26.895 | -11.959 | 1.704  |
| C      |      |   |   |         |         |        |
| HETATM | 1057 | H | 0 | -27.476 | -12.596 | 2.103  |
| H      |      |   |   |         |         |        |
| HETATM | 1058 | C | 0 | -27.433 | -10.893 | 0.955  |
| C      |      |   |   |         |         |        |
| HETATM | 1059 | H | 0 | -28.374 | -10.815 | 0.850  |
| H      |      |   |   |         |         |        |
| HETATM | 1060 | C | 0 | -26.604 | -9.974  | 0.381  |
| C      |      |   |   |         |         |        |
| HETATM | 1061 | H | 0 | -26.973 | -9.259  | -0.121 |
| H      |      |   |   |         |         |        |
| HETATM | 1062 | C | 0 | -25.192 | -10.075 | 0.528  |
| C      |      |   |   |         |         |        |
| HETATM | 1063 | C | 0 | -24.314 | -9.138  | -0.042 |
| C      |      |   |   |         |         |        |
| HETATM | 1064 | H | 0 | -24.668 | -8.418  | -0.552 |
| H      |      |   |   |         |         |        |
| HETATM | 1065 | C | 0 | -17.614 | -8.050  | -3.134 |
| C      |      |   |   |         |         |        |

END

|         |    |    |    |    |
|---------|----|----|----|----|
| CONNECT | 1  | 7  | 42 |    |
| CONNECT | 2  | 17 | 18 |    |
| CONNECT | 3  | 36 |    |    |
| CONNECT | 4  | 8  | 16 |    |
| CONNECT | 5  | 6  | 17 |    |
| CONNECT | 6  | 5  | 18 |    |
| CONNECT | 7  | 1  | 36 |    |
| CONNECT | 8  | 4  | 9  | 10 |
| CONNECT | 9  | 8  |    |    |
| CONNECT | 10 | 8  | 11 | 12 |
| CONNECT | 11 | 10 |    |    |
| CONNECT | 12 | 10 | 13 | 14 |
| CONNECT | 13 | 12 |    |    |
| CONNECT | 14 | 12 | 15 | 16 |
| CONNECT | 15 | 14 |    |    |
| CONNECT | 16 | 4  | 14 | 17 |
| CONNECT | 17 | 5  | 16 | 2  |
| CONNECT | 18 | 6  | 2  | 19 |
| CONNECT | 19 | 18 | 20 | 34 |
| CONNECT | 20 | 19 | 21 | 22 |
| CONNECT | 21 | 20 |    |    |
| CONNECT | 22 | 20 | 23 | 24 |
| CONNECT | 23 | 22 |    |    |
| CONNECT | 24 | 22 | 25 | 33 |
| CONNECT | 25 | 24 | 26 | 27 |
| CONNECT | 26 | 25 |    |    |
| CONNECT | 27 | 25 | 28 | 29 |
| CONNECT | 28 | 27 |    |    |
| CONNECT | 29 | 27 | 30 | 31 |
| CONNECT | 30 | 29 |    |    |

|        |    |     |     |    |
|--------|----|-----|-----|----|
| CONECT | 31 | 29  | 32  | 33 |
| CONECT | 32 | 31  |     |    |
| CONECT | 33 | 24  | 31  | 34 |
| CONECT | 34 | 19  | 33  | 35 |
| CONECT | 35 | 34  |     |    |
| CONECT | 36 | 3   | 7   |    |
| CONECT | 37 | 52  | 53  |    |
| CONECT | 38 | 71  |     |    |
| CONECT | 39 | 43  | 51  |    |
| CONECT | 40 | 41  | 52  |    |
| CONECT | 41 | 40  | 53  |    |
| CONECT | 42 | 1   | 71  |    |
| CONECT | 43 | 39  | 44  | 45 |
| CONECT | 44 | 43  |     |    |
| CONECT | 45 | 43  | 46  | 47 |
| CONECT | 46 | 45  |     |    |
| CONECT | 47 | 45  | 48  | 49 |
| CONECT | 48 | 47  |     |    |
| CONECT | 49 | 47  | 50  | 51 |
| CONECT | 50 | 49  |     |    |
| CONECT | 51 | 49  | 39  | 52 |
| CONECT | 52 | 37  | 40  | 51 |
| CONECT | 53 | 37  | 41  | 54 |
| CONECT | 54 | 53  | 55  | 69 |
| CONECT | 55 | 54  | 56  | 57 |
| CONECT | 56 | 55  |     |    |
| CONECT | 57 | 55  | 58  | 59 |
| CONECT | 58 | 57  |     |    |
| CONECT | 59 | 57  | 60  | 68 |
| CONECT | 60 | 59  | 61  | 62 |
| CONECT | 61 | 60  |     |    |
| CONECT | 62 | 60  | 63  | 64 |
| CONECT | 63 | 62  |     |    |
| CONECT | 64 | 62  | 65  | 66 |
| CONECT | 65 | 64  |     |    |
| CONECT | 66 | 64  | 67  | 68 |
| CONECT | 67 | 66  |     |    |
| CONECT | 68 | 66  | 59  | 69 |
| CONECT | 69 | 68  | 54  | 70 |
| CONECT | 70 | 69  |     |    |
| CONECT | 71 | 38  | 42  |    |
| CONECT | 72 | 78  | 113 |    |
| CONECT | 73 | 88  | 89  |    |
| CONECT | 74 | 107 |     |    |
| CONECT | 75 | 79  | 87  |    |
| CONECT | 76 | 77  | 88  |    |
| CONECT | 77 | 76  | 89  |    |
| CONECT | 78 | 72  | 107 |    |
| CONECT | 79 | 75  | 80  | 81 |
| CONECT | 80 | 79  |     |    |
| CONECT | 81 | 79  | 82  | 83 |
| CONECT | 82 | 81  |     |    |
| CONECT | 83 | 81  | 84  | 85 |
| CONECT | 84 | 83  |     |    |
| CONECT | 85 | 83  | 86  | 87 |
| CONECT | 86 | 85  |     |    |
| CONECT | 87 | 75  | 85  | 88 |



|        |     |     |     |     |
|--------|-----|-----|-----|-----|
| CONECT | 88  | 76  | 73  | 87  |
| CONECT | 89  | 73  | 77  | 90  |
| CONECT | 90  | 89  | 91  | 105 |
| CONECT | 91  | 90  | 92  | 93  |
| CONECT | 92  | 91  |     |     |
| CONECT | 93  | 91  | 94  | 95  |
| CONECT | 94  | 93  |     |     |
| CONECT | 95  | 93  | 96  | 104 |
| CONECT | 96  | 95  | 97  | 98  |
| CONECT | 97  | 96  |     |     |
| CONECT | 98  | 96  | 99  | 100 |
| CONECT | 99  | 98  |     |     |
| CONECT | 100 | 98  | 101 | 102 |
| CONECT | 101 | 100 |     |     |
| CONECT | 102 | 100 | 103 | 104 |
| CONECT | 103 | 102 |     |     |
| CONECT | 104 | 95  | 102 | 105 |
| CONECT | 105 | 90  | 104 | 106 |
| CONECT | 106 | 105 |     |     |
| CONECT | 107 | 78  | 74  |     |
| CONECT | 108 | 123 | 124 |     |
| CONECT | 109 | 142 |     |     |
| CONECT | 110 | 114 | 122 |     |
| CONECT | 111 | 112 | 123 |     |
| CONECT | 112 | 111 | 124 |     |
| CONECT | 113 | 72  | 142 |     |
| CONECT | 114 | 110 | 115 | 116 |
| CONECT | 115 | 114 |     |     |
| CONECT | 116 | 114 | 117 | 118 |
| CONECT | 117 | 116 |     |     |
| CONECT | 118 | 116 | 119 | 120 |
| CONECT | 119 | 118 |     |     |
| CONECT | 120 | 118 | 121 | 122 |
| CONECT | 121 | 120 |     |     |
| CONECT | 122 | 120 | 110 | 123 |
| CONECT | 123 | 108 | 111 | 122 |
| CONECT | 124 | 108 | 112 | 125 |
| CONECT | 125 | 124 | 126 | 140 |
| CONECT | 126 | 125 | 127 | 128 |
| CONECT | 127 | 126 |     |     |
| CONECT | 128 | 126 | 129 | 130 |
| CONECT | 129 | 128 |     |     |
| CONECT | 130 | 128 | 131 | 139 |
| CONECT | 131 | 130 | 132 | 133 |
| CONECT | 132 | 131 |     |     |
| CONECT | 133 | 131 | 134 | 135 |
| CONECT | 134 | 133 |     |     |
| CONECT | 135 | 133 | 136 | 137 |
| CONECT | 136 | 135 |     |     |
| CONECT | 137 | 135 | 138 | 139 |
| CONECT | 138 | 137 |     |     |
| CONECT | 139 | 130 | 137 | 140 |
| CONECT | 140 | 139 | 125 | 141 |
| CONECT | 141 | 140 |     |     |
| CONECT | 142 | 109 | 113 |     |
| CONECT | 143 | 149 | 184 |     |
| CONECT | 144 | 159 | 160 |     |

|         |     |     |     |     |
|---------|-----|-----|-----|-----|
| CONNECT | 145 | 178 |     |     |
| CONNECT | 146 | 150 | 158 |     |
| CONNECT | 147 | 148 | 159 |     |
| CONNECT | 148 | 147 | 160 |     |
| CONNECT | 149 | 143 | 178 |     |
| CONNECT | 150 | 146 | 151 | 152 |
| CONNECT | 151 | 150 |     |     |
| CONNECT | 152 | 150 | 153 | 154 |
| CONNECT | 153 | 152 |     |     |
| CONNECT | 154 | 152 | 155 | 156 |
| CONNECT | 155 | 154 |     |     |
| CONNECT | 156 | 154 | 157 | 158 |
| CONNECT | 157 | 156 |     |     |
| CONNECT | 158 | 146 | 156 | 159 |
| CONNECT | 159 | 144 | 147 | 158 |
| CONNECT | 160 | 144 | 148 | 161 |
| CONNECT | 161 | 160 | 162 | 176 |
| CONNECT | 162 | 161 | 163 | 164 |
| CONNECT | 163 | 162 |     |     |
| CONNECT | 164 | 162 | 165 | 166 |
| CONNECT | 165 | 164 |     |     |
| CONNECT | 166 | 164 | 167 | 175 |
| CONNECT | 167 | 166 | 168 | 169 |
| CONNECT | 168 | 167 |     |     |
| CONNECT | 169 | 167 | 170 | 171 |
| CONNECT | 170 | 169 |     |     |
| CONNECT | 171 | 169 | 172 | 173 |
| CONNECT | 172 | 171 |     |     |
| CONNECT | 173 | 171 | 174 | 175 |
| CONNECT | 174 | 173 |     |     |
| CONNECT | 175 | 166 | 173 | 176 |
| CONNECT | 176 | 161 | 175 | 177 |
| CONNECT | 177 | 176 |     |     |
| CONNECT | 178 | 149 | 145 |     |
| CONNECT | 179 | 194 | 195 |     |
| CONNECT | 180 | 213 |     |     |
| CONNECT | 181 | 185 | 193 |     |
| CONNECT | 182 | 183 | 194 |     |
| CONNECT | 183 | 182 | 195 |     |
| CONNECT | 184 | 143 | 213 |     |
| CONNECT | 185 | 181 | 186 | 187 |
| CONNECT | 186 | 185 |     |     |
| CONNECT | 187 | 185 | 188 | 189 |
| CONNECT | 188 | 187 |     |     |
| CONNECT | 189 | 187 | 190 | 191 |
| CONNECT | 190 | 189 |     |     |
| CONNECT | 191 | 189 | 192 | 193 |
| CONNECT | 192 | 191 |     |     |
| CONNECT | 193 | 181 | 191 | 194 |
| CONNECT | 194 | 193 | 179 | 182 |
| CONNECT | 195 | 179 | 183 | 196 |
| CONNECT | 196 | 195 | 197 | 211 |
| CONNECT | 197 | 196 | 198 | 199 |
| CONNECT | 198 | 197 |     |     |
| CONNECT | 199 | 197 | 200 | 201 |
| CONNECT | 200 | 199 |     |     |
| CONNECT | 201 | 199 | 202 | 210 |

|         |     |     |     |     |
|---------|-----|-----|-----|-----|
| CONNECT | 202 | 201 | 203 | 204 |
| CONNECT | 203 | 202 |     |     |
| CONNECT | 204 | 202 | 205 | 206 |
| CONNECT | 205 | 204 |     |     |
| CONNECT | 206 | 204 | 207 | 208 |
| CONNECT | 207 | 206 |     |     |
| CONNECT | 208 | 206 | 209 | 210 |
| CONNECT | 209 | 208 |     |     |
| CONNECT | 210 | 201 | 208 | 211 |
| CONNECT | 211 | 210 | 196 | 212 |
| CONNECT | 212 | 211 |     |     |
| CONNECT | 213 | 180 | 184 |     |
| CONNECT | 214 | 220 | 255 |     |
| CONNECT | 215 | 230 | 231 |     |
| CONNECT | 216 | 249 |     |     |
| CONNECT | 217 | 221 | 229 |     |
| CONNECT | 218 | 219 | 230 |     |
| CONNECT | 219 | 218 | 231 |     |
| CONNECT | 220 | 214 | 249 |     |
| CONNECT | 221 | 217 | 222 | 223 |
| CONNECT | 222 | 221 |     |     |
| CONNECT | 223 | 221 | 224 | 225 |
| CONNECT | 224 | 223 |     |     |
| CONNECT | 225 | 223 | 226 | 227 |
| CONNECT | 226 | 225 |     |     |
| CONNECT | 227 | 225 | 228 | 229 |
| CONNECT | 228 | 227 |     |     |
| CONNECT | 229 | 217 | 227 | 230 |
| CONNECT | 230 | 229 | 215 | 218 |
| CONNECT | 231 | 215 | 219 | 232 |
| CONNECT | 232 | 231 | 233 | 247 |
| CONNECT | 233 | 232 | 234 | 235 |
| CONNECT | 234 | 233 |     |     |
| CONNECT | 235 | 233 | 236 | 237 |
| CONNECT | 236 | 235 |     |     |
| CONNECT | 237 | 235 | 238 | 246 |
| CONNECT | 238 | 237 | 239 | 240 |
| CONNECT | 239 | 238 |     |     |
| CONNECT | 240 | 238 | 241 | 242 |
| CONNECT | 241 | 240 |     |     |
| CONNECT | 242 | 240 | 243 | 244 |
| CONNECT | 243 | 242 |     |     |
| CONNECT | 244 | 242 | 245 | 246 |
| CONNECT | 245 | 244 |     |     |
| CONNECT | 246 | 237 | 244 | 247 |
| CONNECT | 247 | 232 | 246 | 248 |
| CONNECT | 248 | 247 |     |     |
| CONNECT | 249 | 216 | 220 |     |
| CONNECT | 250 | 265 | 266 |     |
| CONNECT | 251 | 284 |     |     |
| CONNECT | 252 | 256 | 264 |     |
| CONNECT | 253 | 254 | 265 |     |
| CONNECT | 254 | 253 | 266 |     |
| CONNECT | 255 | 214 | 284 |     |
| CONNECT | 256 | 252 | 257 | 258 |
| CONNECT | 257 | 256 |     |     |
| CONNECT | 258 | 256 | 259 | 260 |

|        |     |     |     |     |
|--------|-----|-----|-----|-----|
| CONECT | 259 | 258 |     |     |
| CONECT | 260 | 258 | 261 | 262 |
| CONECT | 261 | 260 |     |     |
| CONECT | 262 | 260 | 263 | 264 |
| CONECT | 263 | 262 |     |     |
| CONECT | 264 | 262 | 252 | 265 |
| CONECT | 265 | 250 | 253 | 264 |
| CONECT | 266 | 250 | 254 | 267 |
| CONECT | 267 | 266 | 268 | 282 |
| CONECT | 268 | 267 | 269 | 270 |
| CONECT | 269 | 268 |     |     |
| CONECT | 270 | 268 | 271 | 272 |
| CONECT | 271 | 270 |     |     |
| CONECT | 272 | 270 | 273 | 281 |
| CONECT | 273 | 272 | 274 | 275 |
| CONECT | 274 | 273 |     |     |
| CONECT | 275 | 273 | 276 | 277 |
| CONECT | 276 | 275 |     |     |
| CONECT | 277 | 275 | 278 | 279 |
| CONECT | 278 | 277 |     |     |
| CONECT | 279 | 277 | 280 | 281 |
| CONECT | 280 | 279 |     |     |
| CONECT | 281 | 279 | 272 | 282 |
| CONECT | 282 | 281 | 267 | 283 |
| CONECT | 283 | 282 |     |     |
| CONECT | 284 | 251 | 255 |     |
| CONECT | 285 | 291 | 326 |     |
| CONECT | 286 | 301 | 302 |     |
| CONECT | 287 | 320 |     |     |
| CONECT | 288 | 292 | 300 |     |
| CONECT | 289 | 290 | 301 |     |
| CONECT | 290 | 289 | 302 |     |
| CONECT | 291 | 285 | 320 |     |
| CONECT | 292 | 288 | 293 | 294 |
| CONECT | 293 | 292 |     |     |
| CONECT | 294 | 292 | 295 | 296 |
| CONECT | 295 | 294 |     |     |
| CONECT | 296 | 294 | 297 | 298 |
| CONECT | 297 | 296 |     |     |
| CONECT | 298 | 296 | 299 | 300 |
| CONECT | 299 | 298 |     |     |
| CONECT | 300 | 288 | 298 | 301 |
| CONECT | 301 | 300 | 289 | 286 |
| CONECT | 302 | 290 | 286 | 303 |
| CONECT | 303 | 302 | 304 | 318 |
| CONECT | 304 | 303 | 305 | 306 |
| CONECT | 305 | 304 |     |     |
| CONECT | 306 | 304 | 307 | 308 |
| CONECT | 307 | 306 |     |     |
| CONECT | 308 | 306 | 309 | 317 |
| CONECT | 309 | 308 | 310 | 311 |
| CONECT | 310 | 309 |     |     |
| CONECT | 311 | 309 | 312 | 313 |
| CONECT | 312 | 311 |     |     |
| CONECT | 313 | 311 | 314 | 315 |
| CONECT | 314 | 313 |     |     |
| CONECT | 315 | 313 | 316 | 317 |

|         |     |     |     |     |
|---------|-----|-----|-----|-----|
| CONNECT | 316 | 315 |     |     |
| CONNECT | 317 | 308 | 315 | 318 |
| CONNECT | 318 | 303 | 317 | 319 |
| CONNECT | 319 | 318 |     |     |
| CONNECT | 320 | 287 | 291 |     |
| CONNECT | 321 | 336 | 337 |     |
| CONNECT | 322 | 355 |     |     |
| CONNECT | 323 | 327 | 335 |     |
| CONNECT | 324 | 325 | 336 |     |
| CONNECT | 325 | 324 | 337 |     |
| CONNECT | 326 | 285 | 355 |     |
| CONNECT | 327 | 323 | 328 | 329 |
| CONNECT | 328 | 327 |     |     |
| CONNECT | 329 | 327 | 330 | 331 |
| CONNECT | 330 | 329 |     |     |
| CONNECT | 331 | 329 | 332 | 333 |
| CONNECT | 332 | 331 |     |     |
| CONNECT | 333 | 331 | 334 | 335 |
| CONNECT | 334 | 333 |     |     |
| CONNECT | 335 | 333 | 323 | 336 |
| CONNECT | 336 | 321 | 324 | 335 |
| CONNECT | 337 | 321 | 325 | 338 |
| CONNECT | 338 | 337 | 339 | 353 |
| CONNECT | 339 | 338 | 340 | 341 |
| CONNECT | 340 | 339 |     |     |
| CONNECT | 341 | 339 | 342 | 343 |
| CONNECT | 342 | 341 |     |     |
| CONNECT | 343 | 341 | 344 | 352 |
| CONNECT | 344 | 343 | 345 | 346 |
| CONNECT | 345 | 344 |     |     |
| CONNECT | 346 | 344 | 347 | 348 |
| CONNECT | 347 | 346 |     |     |
| CONNECT | 348 | 346 | 349 | 350 |
| CONNECT | 349 | 348 |     |     |
| CONNECT | 350 | 348 | 351 | 352 |
| CONNECT | 351 | 350 |     |     |
| CONNECT | 352 | 343 | 350 | 353 |
| CONNECT | 353 | 338 | 352 | 354 |
| CONNECT | 354 | 353 |     |     |
| CONNECT | 355 | 322 | 326 |     |
| CONNECT | 356 | 362 | 397 |     |
| CONNECT | 357 | 372 | 373 |     |
| CONNECT | 358 | 391 |     |     |
| CONNECT | 359 | 363 | 371 |     |
| CONNECT | 360 | 361 | 372 |     |
| CONNECT | 361 | 360 | 373 |     |
| CONNECT | 362 | 356 | 391 |     |
| CONNECT | 363 | 359 | 364 | 365 |
| CONNECT | 364 | 363 |     |     |
| CONNECT | 365 | 363 | 366 | 367 |
| CONNECT | 366 | 365 |     |     |
| CONNECT | 367 | 365 | 368 | 369 |
| CONNECT | 368 | 367 |     |     |
| CONNECT | 369 | 367 | 370 | 371 |
| CONNECT | 370 | 369 |     |     |
| CONNECT | 371 | 359 | 369 | 372 |
| CONNECT | 372 | 371 | 357 | 360 |

|         |     |     |     |     |
|---------|-----|-----|-----|-----|
| CONNECT | 373 | 357 | 361 | 374 |
| CONNECT | 374 | 373 | 375 | 389 |
| CONNECT | 375 | 374 | 376 | 377 |
| CONNECT | 376 | 375 |     |     |
| CONNECT | 377 | 375 | 378 | 379 |
| CONNECT | 378 | 377 |     |     |
| CONNECT | 379 | 377 | 380 | 388 |
| CONNECT | 380 | 379 | 381 | 382 |
| CONNECT | 381 | 380 |     |     |
| CONNECT | 382 | 380 | 383 | 384 |
| CONNECT | 383 | 382 |     |     |
| CONNECT | 384 | 382 | 385 | 386 |
| CONNECT | 385 | 384 |     |     |
| CONNECT | 386 | 384 | 387 | 388 |
| CONNECT | 387 | 386 |     |     |
| CONNECT | 388 | 379 | 386 | 389 |
| CONNECT | 389 | 388 | 374 | 390 |
| CONNECT | 390 | 389 |     |     |
| CONNECT | 391 | 358 | 362 |     |
| CONNECT | 392 | 407 | 408 |     |
| CONNECT | 393 | 426 |     |     |
| CONNECT | 394 | 398 | 406 |     |
| CONNECT | 395 | 396 | 407 |     |
| CONNECT | 396 | 395 | 408 |     |
| CONNECT | 397 | 356 | 426 |     |
| CONNECT | 398 | 394 | 399 | 400 |
| CONNECT | 399 | 398 |     |     |
| CONNECT | 400 | 398 | 401 | 402 |
| CONNECT | 401 | 400 |     |     |
| CONNECT | 402 | 400 | 403 | 404 |
| CONNECT | 403 | 402 |     |     |
| CONNECT | 404 | 402 | 405 | 406 |
| CONNECT | 405 | 404 |     |     |
| CONNECT | 406 | 394 | 404 | 407 |
| CONNECT | 407 | 392 | 395 | 406 |
| CONNECT | 408 | 392 | 396 | 409 |
| CONNECT | 409 | 408 | 410 | 424 |
| CONNECT | 410 | 409 | 411 | 412 |
| CONNECT | 411 | 410 |     |     |
| CONNECT | 412 | 410 | 413 | 414 |
| CONNECT | 413 | 412 |     |     |
| CONNECT | 414 | 412 | 415 | 423 |
| CONNECT | 415 | 414 | 416 | 417 |
| CONNECT | 416 | 415 |     |     |
| CONNECT | 417 | 415 | 418 | 419 |
| CONNECT | 418 | 417 |     |     |
| CONNECT | 419 | 417 | 420 | 421 |
| CONNECT | 420 | 419 |     |     |
| CONNECT | 421 | 419 | 422 | 423 |
| CONNECT | 422 | 421 |     |     |
| CONNECT | 423 | 414 | 421 | 424 |
| CONNECT | 424 | 423 | 409 | 425 |
| CONNECT | 425 | 424 |     |     |
| CONNECT | 426 | 393 | 397 |     |
| CONNECT | 427 | 433 | 468 |     |
| CONNECT | 428 | 443 | 444 |     |
| CONNECT | 429 | 462 |     |     |

|        |     |     |     |     |
|--------|-----|-----|-----|-----|
| CONECT | 430 | 434 | 442 |     |
| CONECT | 431 | 432 | 443 |     |
| CONECT | 432 | 431 | 444 |     |
| CONECT | 433 | 427 | 462 |     |
| CONECT | 434 | 430 | 435 | 436 |
| CONECT | 435 | 434 |     |     |
| CONECT | 436 | 434 | 437 | 438 |
| CONECT | 437 | 436 |     |     |
| CONECT | 438 | 436 | 439 | 440 |
| CONECT | 439 | 438 |     |     |
| CONECT | 440 | 438 | 441 | 442 |
| CONECT | 441 | 440 |     |     |
| CONECT | 442 | 430 | 440 | 443 |
| CONECT | 443 | 428 | 431 | 442 |
| CONECT | 444 | 428 | 432 | 445 |
| CONECT | 445 | 444 | 446 | 460 |
| CONECT | 446 | 445 | 447 | 448 |
| CONECT | 447 | 446 |     |     |
| CONECT | 448 | 446 | 449 | 450 |
| CONECT | 449 | 448 |     |     |
| CONECT | 450 | 448 | 451 | 459 |
| CONECT | 451 | 450 | 452 | 453 |
| CONECT | 452 | 451 |     |     |
| CONECT | 453 | 451 | 454 | 455 |
| CONECT | 454 | 453 |     |     |
| CONECT | 455 | 453 | 456 | 457 |
| CONECT | 456 | 455 |     |     |
| CONECT | 457 | 455 | 458 | 459 |
| CONECT | 458 | 457 |     |     |
| CONECT | 459 | 450 | 457 | 460 |
| CONECT | 460 | 445 | 459 | 461 |
| CONECT | 461 | 460 |     |     |
| CONECT | 462 | 429 | 433 |     |
| CONECT | 463 | 478 | 479 |     |
| CONECT | 464 | 497 |     |     |
| CONECT | 465 | 469 | 477 |     |
| CONECT | 466 | 467 | 478 |     |
| CONECT | 467 | 466 | 479 |     |
| CONECT | 468 | 427 | 497 |     |
| CONECT | 469 | 465 | 470 | 471 |
| CONECT | 470 | 469 |     |     |
| CONECT | 471 | 469 | 472 | 473 |
| CONECT | 472 | 471 |     |     |
| CONECT | 473 | 471 | 474 | 475 |
| CONECT | 474 | 473 |     |     |
| CONECT | 475 | 473 | 476 | 477 |
| CONECT | 476 | 475 |     |     |
| CONECT | 477 | 475 | 465 | 478 |
| CONECT | 478 | 463 | 466 | 477 |
| CONECT | 479 | 463 | 467 | 480 |
| CONECT | 480 | 479 | 481 | 495 |
| CONECT | 481 | 480 | 482 | 483 |
| CONECT | 482 | 481 |     |     |
| CONECT | 483 | 481 | 484 | 485 |
| CONECT | 484 | 483 |     |     |
| CONECT | 485 | 483 | 486 | 494 |
| CONECT | 486 | 485 | 487 | 488 |

|         |     |     |     |     |
|---------|-----|-----|-----|-----|
| CONNECT | 487 | 486 |     |     |
| CONNECT | 488 | 486 | 489 | 490 |
| CONNECT | 489 | 488 |     |     |
| CONNECT | 490 | 488 | 491 | 492 |
| CONNECT | 491 | 490 |     |     |
| CONNECT | 492 | 490 | 493 | 494 |
| CONNECT | 493 | 492 |     |     |
| CONNECT | 494 | 485 | 492 | 495 |
| CONNECT | 495 | 494 | 480 | 496 |
| CONNECT | 496 | 495 |     |     |
| CONNECT | 497 | 468 | 464 |     |
| CONNECT | 498 | 504 | 539 |     |
| CONNECT | 499 | 514 | 515 |     |
| CONNECT | 500 | 533 |     |     |
| CONNECT | 501 | 505 | 513 |     |
| CONNECT | 502 | 503 | 514 |     |
| CONNECT | 503 | 502 | 515 |     |
| CONNECT | 504 | 498 | 533 |     |
| CONNECT | 505 | 501 | 506 | 507 |
| CONNECT | 506 | 505 |     |     |
| CONNECT | 507 | 505 | 508 | 509 |
| CONNECT | 508 | 507 |     |     |
| CONNECT | 509 | 507 | 510 | 511 |
| CONNECT | 510 | 509 |     |     |
| CONNECT | 511 | 509 | 512 | 513 |
| CONNECT | 512 | 511 |     |     |
| CONNECT | 513 | 501 | 511 | 514 |
| CONNECT | 514 | 499 | 502 | 513 |
| CONNECT | 515 | 499 | 503 | 516 |
| CONNECT | 516 | 515 | 517 | 531 |
| CONNECT | 517 | 516 | 518 | 519 |
| CONNECT | 518 | 517 |     |     |
| CONNECT | 519 | 517 | 520 | 521 |
| CONNECT | 520 | 519 |     |     |
| CONNECT | 521 | 519 | 522 | 530 |
| CONNECT | 522 | 521 | 523 | 524 |
| CONNECT | 523 | 522 |     |     |
| CONNECT | 524 | 522 | 525 | 526 |
| CONNECT | 525 | 524 |     |     |
| CONNECT | 526 | 524 | 527 | 528 |
| CONNECT | 527 | 526 |     |     |
| CONNECT | 528 | 526 | 529 | 530 |
| CONNECT | 529 | 528 |     |     |
| CONNECT | 530 | 521 | 528 | 531 |
| CONNECT | 531 | 516 | 530 | 532 |
| CONNECT | 532 | 531 |     |     |
| CONNECT | 533 | 500 | 504 |     |
| CONNECT | 534 | 549 | 550 |     |
| CONNECT | 535 | 568 |     |     |
| CONNECT | 536 | 540 | 548 |     |
| CONNECT | 537 | 538 | 549 |     |
| CONNECT | 538 | 537 | 550 |     |
| CONNECT | 539 | 498 | 568 |     |
| CONNECT | 540 | 536 | 541 | 542 |
| CONNECT | 541 | 540 |     |     |
| CONNECT | 542 | 540 | 543 | 544 |
| CONNECT | 543 | 542 |     |     |



|        |     |     |     |     |
|--------|-----|-----|-----|-----|
| CONECT | 544 | 542 | 545 | 546 |
| CONECT | 545 | 544 |     |     |
| CONECT | 546 | 544 | 547 | 548 |
| CONECT | 547 | 546 |     |     |
| CONECT | 548 | 546 | 536 | 549 |
| CONECT | 549 | 548 | 534 | 537 |
| CONECT | 550 | 534 | 538 | 551 |
| CONECT | 551 | 550 | 552 | 566 |
| CONECT | 552 | 551 | 553 | 554 |
| CONECT | 553 | 552 |     |     |
| CONECT | 554 | 552 | 555 | 556 |
| CONECT | 555 | 554 |     |     |
| CONECT | 556 | 554 | 557 | 565 |
| CONECT | 557 | 556 | 558 | 559 |
| CONECT | 558 | 557 |     |     |
| CONECT | 559 | 557 | 560 | 561 |
| CONECT | 560 | 559 |     |     |
| CONECT | 561 | 559 | 562 | 563 |
| CONECT | 562 | 561 |     |     |
| CONECT | 563 | 561 | 564 | 565 |
| CONECT | 564 | 563 |     |     |
| CONECT | 565 | 563 | 556 | 566 |
| CONECT | 566 | 551 | 565 | 567 |
| CONECT | 567 | 566 |     |     |
| CONECT | 568 | 535 | 539 |     |
| CONECT | 569 | 575 | 610 |     |
| CONECT | 570 | 585 | 586 |     |
| CONECT | 571 | 604 |     |     |
| CONECT | 572 | 576 | 584 |     |
| CONECT | 573 | 574 | 585 |     |
| CONECT | 574 | 573 | 586 |     |
| CONECT | 575 | 569 | 604 |     |
| CONECT | 576 | 572 | 577 | 578 |
| CONECT | 577 | 576 |     |     |
| CONECT | 578 | 576 | 579 | 580 |
| CONECT | 579 | 578 |     |     |
| CONECT | 580 | 578 | 581 | 582 |
| CONECT | 581 | 580 |     |     |
| CONECT | 582 | 580 | 583 | 584 |
| CONECT | 583 | 582 |     |     |
| CONECT | 584 | 572 | 582 | 585 |
| CONECT | 585 | 573 | 584 | 570 |
| CONECT | 586 | 574 | 570 | 587 |
| CONECT | 587 | 586 | 588 | 602 |
| CONECT | 588 | 587 | 589 | 590 |
| CONECT | 589 | 588 |     |     |
| CONECT | 590 | 588 | 591 | 592 |
| CONECT | 591 | 590 |     |     |
| CONECT | 592 | 590 | 593 | 601 |
| CONECT | 593 | 592 | 594 | 595 |
| CONECT | 594 | 593 |     |     |
| CONECT | 595 | 593 | 596 | 597 |
| CONECT | 596 | 595 |     |     |
| CONECT | 597 | 595 | 598 | 599 |
| CONECT | 598 | 597 |     |     |
| CONECT | 599 | 597 | 600 | 601 |
| CONECT | 600 | 599 |     |     |

|         |     |     |     |     |
|---------|-----|-----|-----|-----|
| CONNECT | 601 | 592 | 599 | 602 |
| CONNECT | 602 | 601 | 587 | 603 |
| CONNECT | 603 | 602 |     |     |
| CONNECT | 604 | 571 | 575 |     |
| CONNECT | 605 | 620 | 621 |     |
| CONNECT | 606 | 639 |     |     |
| CONNECT | 607 | 611 | 619 |     |
| CONNECT | 608 | 609 | 620 |     |
| CONNECT | 609 | 608 | 621 |     |
| CONNECT | 610 | 569 | 639 |     |
| CONNECT | 611 | 607 | 612 | 613 |
| CONNECT | 612 | 611 |     |     |
| CONNECT | 613 | 611 | 614 | 615 |
| CONNECT | 614 | 613 |     |     |
| CONNECT | 615 | 613 | 616 | 617 |
| CONNECT | 616 | 615 |     |     |
| CONNECT | 617 | 615 | 618 | 619 |
| CONNECT | 618 | 617 |     |     |
| CONNECT | 619 | 607 | 617 | 620 |
| CONNECT | 620 | 605 | 619 | 608 |
| CONNECT | 621 | 605 | 609 | 622 |
| CONNECT | 622 | 621 | 623 | 637 |
| CONNECT | 623 | 622 | 624 | 625 |
| CONNECT | 624 | 623 |     |     |
| CONNECT | 625 | 623 | 626 | 627 |
| CONNECT | 626 | 625 |     |     |
| CONNECT | 627 | 625 | 628 | 636 |
| CONNECT | 628 | 627 | 629 | 630 |
| CONNECT | 629 | 628 |     |     |
| CONNECT | 630 | 628 | 631 | 632 |
| CONNECT | 631 | 630 |     |     |
| CONNECT | 632 | 630 | 633 | 634 |
| CONNECT | 633 | 632 |     |     |
| CONNECT | 634 | 632 | 635 | 636 |
| CONNECT | 635 | 634 |     |     |
| CONNECT | 636 | 627 | 634 | 637 |
| CONNECT | 637 | 636 | 622 | 638 |
| CONNECT | 638 | 637 |     |     |
| CONNECT | 639 | 606 | 610 |     |
| CONNECT | 640 | 646 | 681 |     |
| CONNECT | 641 | 656 | 657 |     |
| CONNECT | 642 | 675 |     |     |
| CONNECT | 643 | 647 | 655 |     |
| CONNECT | 644 | 645 | 656 |     |
| CONNECT | 645 | 644 | 657 |     |
| CONNECT | 646 | 640 | 675 |     |
| CONNECT | 647 | 643 | 648 | 649 |
| CONNECT | 648 | 647 |     |     |
| CONNECT | 649 | 647 | 650 | 651 |
| CONNECT | 650 | 649 |     |     |
| CONNECT | 651 | 649 | 652 | 653 |
| CONNECT | 652 | 651 |     |     |
| CONNECT | 653 | 651 | 654 | 655 |
| CONNECT | 654 | 653 |     |     |
| CONNECT | 655 | 643 | 653 | 656 |
| CONNECT | 656 | 644 | 655 | 641 |
| CONNECT | 657 | 641 | 645 | 658 |

|         |     |     |     |     |
|---------|-----|-----|-----|-----|
| CONNECT | 658 | 657 | 659 | 673 |
| CONNECT | 659 | 658 | 660 | 661 |
| CONNECT | 660 | 659 |     |     |
| CONNECT | 661 | 659 | 662 | 663 |
| CONNECT | 662 | 661 |     |     |
| CONNECT | 663 | 661 | 664 | 672 |
| CONNECT | 664 | 663 | 665 | 666 |
| CONNECT | 665 | 664 |     |     |
| CONNECT | 666 | 664 | 667 | 668 |
| CONNECT | 667 | 666 |     |     |
| CONNECT | 668 | 666 | 669 | 670 |
| CONNECT | 669 | 668 |     |     |
| CONNECT | 670 | 668 | 671 | 672 |
| CONNECT | 671 | 670 |     |     |
| CONNECT | 672 | 663 | 670 | 673 |
| CONNECT | 673 | 658 | 672 | 674 |
| CONNECT | 674 | 673 |     |     |
| CONNECT | 675 | 642 | 646 |     |
| CONNECT | 676 | 691 | 692 |     |
| CONNECT | 677 | 710 |     |     |
| CONNECT | 678 | 682 | 690 |     |
| CONNECT | 679 | 680 | 691 |     |
| CONNECT | 680 | 679 | 692 |     |
| CONNECT | 681 | 640 | 710 |     |
| CONNECT | 682 | 678 | 683 | 684 |
| CONNECT | 683 | 682 |     |     |
| CONNECT | 684 | 682 | 685 | 686 |
| CONNECT | 685 | 684 |     |     |
| CONNECT | 686 | 684 | 687 | 688 |
| CONNECT | 687 | 686 |     |     |
| CONNECT | 688 | 686 | 689 | 690 |
| CONNECT | 689 | 688 |     |     |
| CONNECT | 690 | 688 | 678 | 691 |
| CONNECT | 691 | 676 | 679 | 690 |
| CONNECT | 692 | 676 | 680 | 693 |
| CONNECT | 693 | 692 | 694 | 708 |
| CONNECT | 694 | 693 | 695 | 696 |
| CONNECT | 695 | 694 |     |     |
| CONNECT | 696 | 694 | 697 | 698 |
| CONNECT | 697 | 696 |     |     |
| CONNECT | 698 | 696 | 699 | 707 |
| CONNECT | 699 | 698 | 700 | 701 |
| CONNECT | 700 | 699 |     |     |
| CONNECT | 701 | 699 | 702 | 703 |
| CONNECT | 702 | 701 |     |     |
| CONNECT | 703 | 701 | 704 | 705 |
| CONNECT | 704 | 703 |     |     |
| CONNECT | 705 | 703 | 706 | 707 |
| CONNECT | 706 | 705 |     |     |
| CONNECT | 707 | 698 | 705 | 708 |
| CONNECT | 708 | 693 | 707 | 709 |
| CONNECT | 709 | 708 |     |     |
| CONNECT | 710 | 677 | 681 |     |
| CONNECT | 711 | 717 | 752 |     |
| CONNECT | 712 | 727 | 728 |     |
| CONNECT | 713 | 746 |     |     |
| CONNECT | 714 | 718 | 726 |     |

|         |     |     |     |     |
|---------|-----|-----|-----|-----|
| CONNECT | 715 | 716 | 727 |     |
| CONNECT | 716 | 715 | 728 |     |
| CONNECT | 717 | 711 | 746 |     |
| CONNECT | 718 | 714 | 719 | 720 |
| CONNECT | 719 | 718 |     |     |
| CONNECT | 720 | 718 | 721 | 722 |
| CONNECT | 721 | 720 |     |     |
| CONNECT | 722 | 720 | 723 | 724 |
| CONNECT | 723 | 722 |     |     |
| CONNECT | 724 | 722 | 725 | 726 |
| CONNECT | 725 | 724 |     |     |
| CONNECT | 726 | 714 | 724 | 727 |
| CONNECT | 727 | 726 | 712 | 715 |
| CONNECT | 728 | 712 | 716 | 729 |
| CONNECT | 729 | 728 | 730 | 744 |
| CONNECT | 730 | 729 | 731 | 732 |
| CONNECT | 731 | 730 |     |     |
| CONNECT | 732 | 730 | 733 | 734 |
| CONNECT | 733 | 732 |     |     |
| CONNECT | 734 | 732 | 735 | 743 |
| CONNECT | 735 | 734 | 736 | 737 |
| CONNECT | 736 | 735 |     |     |
| CONNECT | 737 | 735 | 738 | 739 |
| CONNECT | 738 | 737 |     |     |
| CONNECT | 739 | 737 | 740 | 741 |
| CONNECT | 740 | 739 |     |     |
| CONNECT | 741 | 739 | 742 | 743 |
| CONNECT | 742 | 741 |     |     |
| CONNECT | 743 | 734 | 741 | 744 |
| CONNECT | 744 | 729 | 743 | 745 |
| CONNECT | 745 | 744 |     |     |
| CONNECT | 746 | 713 | 717 |     |
| CONNECT | 747 | 762 | 763 |     |
| CONNECT | 748 | 781 |     |     |
| CONNECT | 749 | 753 | 761 |     |
| CONNECT | 750 | 751 | 762 |     |
| CONNECT | 751 | 750 | 763 |     |
| CONNECT | 752 | 711 | 781 |     |
| CONNECT | 753 | 749 | 754 | 755 |
| CONNECT | 754 | 753 |     |     |
| CONNECT | 755 | 753 | 756 | 757 |
| CONNECT | 756 | 755 |     |     |
| CONNECT | 757 | 755 | 758 | 759 |
| CONNECT | 758 | 757 |     |     |
| CONNECT | 759 | 757 | 760 | 761 |
| CONNECT | 760 | 759 |     |     |
| CONNECT | 761 | 749 | 759 | 762 |
| CONNECT | 762 | 747 | 750 | 761 |
| CONNECT | 763 | 747 | 751 | 764 |
| CONNECT | 764 | 763 | 765 | 779 |
| CONNECT | 765 | 764 | 766 | 767 |
| CONNECT | 766 | 765 |     |     |
| CONNECT | 767 | 765 | 768 | 769 |
| CONNECT | 768 | 767 |     |     |
| CONNECT | 769 | 767 | 770 | 778 |
| CONNECT | 770 | 769 | 771 | 772 |
| CONNECT | 771 | 770 |     |     |

|         |     |     |     |     |
|---------|-----|-----|-----|-----|
| CONNECT | 772 | 770 | 773 | 774 |
| CONNECT | 773 | 772 |     |     |
| CONNECT | 774 | 772 | 775 | 776 |
| CONNECT | 775 | 774 |     |     |
| CONNECT | 776 | 774 | 777 | 778 |
| CONNECT | 777 | 776 |     |     |
| CONNECT | 778 | 769 | 776 | 779 |
| CONNECT | 779 | 778 | 764 | 780 |
| CONNECT | 780 | 779 |     |     |
| CONNECT | 781 | 748 | 752 |     |
| CONNECT | 782 | 788 | 823 |     |
| CONNECT | 783 | 798 | 799 |     |
| CONNECT | 784 | 817 |     |     |
| CONNECT | 785 | 789 | 797 |     |
| CONNECT | 786 | 787 | 798 |     |
| CONNECT | 787 | 786 | 799 |     |
| CONNECT | 788 | 782 | 817 |     |
| CONNECT | 789 | 785 | 790 | 791 |
| CONNECT | 790 | 789 |     |     |
| CONNECT | 791 | 789 | 792 | 793 |
| CONNECT | 792 | 791 |     |     |
| CONNECT | 793 | 791 | 794 | 795 |
| CONNECT | 794 | 793 |     |     |
| CONNECT | 795 | 793 | 796 | 797 |
| CONNECT | 796 | 795 |     |     |
| CONNECT | 797 | 785 | 795 | 798 |
| CONNECT | 798 | 797 | 786 | 783 |
| CONNECT | 799 | 787 | 783 | 800 |
| CONNECT | 800 | 799 | 801 | 815 |
| CONNECT | 801 | 800 | 802 | 803 |
| CONNECT | 802 | 801 |     |     |
| CONNECT | 803 | 801 | 804 | 805 |
| CONNECT | 804 | 803 |     |     |
| CONNECT | 805 | 803 | 806 | 814 |
| CONNECT | 806 | 805 | 807 | 808 |
| CONNECT | 807 | 806 |     |     |
| CONNECT | 808 | 806 | 809 | 810 |
| CONNECT | 809 | 808 |     |     |
| CONNECT | 810 | 808 | 811 | 812 |
| CONNECT | 811 | 810 |     |     |
| CONNECT | 812 | 810 | 813 | 814 |
| CONNECT | 813 | 812 |     |     |
| CONNECT | 814 | 805 | 812 | 815 |
| CONNECT | 815 | 814 | 800 | 816 |
| CONNECT | 816 | 815 |     |     |
| CONNECT | 817 | 784 | 788 |     |
| CONNECT | 818 | 833 | 834 |     |
| CONNECT | 819 | 852 |     |     |
| CONNECT | 820 | 824 | 832 |     |
| CONNECT | 821 | 822 | 833 |     |
| CONNECT | 822 | 821 | 834 |     |
| CONNECT | 823 | 782 | 852 |     |
| CONNECT | 824 | 820 | 825 | 826 |
| CONNECT | 825 | 824 |     |     |
| CONNECT | 826 | 824 | 827 | 828 |
| CONNECT | 827 | 826 |     |     |
| CONNECT | 828 | 826 | 829 | 830 |

|         |     |     |     |     |
|---------|-----|-----|-----|-----|
| CONNECT | 829 | 828 |     |     |
| CONNECT | 830 | 828 | 831 | 832 |
| CONNECT | 831 | 830 |     |     |
| CONNECT | 832 | 830 | 820 | 833 |
| CONNECT | 833 | 818 | 821 | 832 |
| CONNECT | 834 | 818 | 822 | 835 |
| CONNECT | 835 | 834 | 836 | 850 |
| CONNECT | 836 | 835 | 837 | 838 |
| CONNECT | 837 | 836 |     |     |
| CONNECT | 838 | 836 | 839 | 840 |
| CONNECT | 839 | 838 |     |     |
| CONNECT | 840 | 838 | 841 | 849 |
| CONNECT | 841 | 840 | 842 | 843 |
| CONNECT | 842 | 841 |     |     |
| CONNECT | 843 | 841 | 844 | 845 |
| CONNECT | 844 | 843 |     |     |
| CONNECT | 845 | 843 | 846 | 847 |
| CONNECT | 846 | 845 |     |     |
| CONNECT | 847 | 845 | 848 | 849 |
| CONNECT | 848 | 847 |     |     |
| CONNECT | 849 | 840 | 847 | 850 |
| CONNECT | 850 | 835 | 849 | 851 |
| CONNECT | 851 | 850 |     |     |
| CONNECT | 852 | 819 | 823 |     |
| CONNECT | 853 | 859 | 894 |     |
| CONNECT | 854 | 869 | 870 |     |
| CONNECT | 855 | 888 |     |     |
| CONNECT | 856 | 860 | 868 |     |
| CONNECT | 857 | 858 | 869 |     |
| CONNECT | 858 | 857 | 870 |     |
| CONNECT | 859 | 853 | 888 |     |
| CONNECT | 860 | 856 | 861 | 862 |
| CONNECT | 861 | 860 |     |     |
| CONNECT | 862 | 860 | 863 | 864 |
| CONNECT | 863 | 862 |     |     |
| CONNECT | 864 | 862 | 865 | 866 |
| CONNECT | 865 | 864 |     |     |
| CONNECT | 866 | 864 | 867 | 868 |
| CONNECT | 867 | 866 |     |     |
| CONNECT | 868 | 856 | 866 | 869 |
| CONNECT | 869 | 857 | 868 | 854 |
| CONNECT | 870 | 858 | 854 | 871 |
| CONNECT | 871 | 870 | 872 | 886 |
| CONNECT | 872 | 871 | 873 | 874 |
| CONNECT | 873 | 872 |     |     |
| CONNECT | 874 | 872 | 875 | 876 |
| CONNECT | 875 | 874 |     |     |
| CONNECT | 876 | 874 | 877 | 885 |
| CONNECT | 877 | 876 | 878 | 879 |
| CONNECT | 878 | 877 |     |     |
| CONNECT | 879 | 877 | 880 | 881 |
| CONNECT | 880 | 879 |     |     |
| CONNECT | 881 | 879 | 882 | 883 |
| CONNECT | 882 | 881 |     |     |
| CONNECT | 883 | 881 | 884 | 885 |
| CONNECT | 884 | 883 |     |     |
| CONNECT | 885 | 883 | 876 | 886 |

|         |     |     |     |     |
|---------|-----|-----|-----|-----|
| CONNECT | 886 | 871 | 885 | 887 |
| CONNECT | 887 | 886 |     |     |
| CONNECT | 888 | 855 | 859 |     |
| CONNECT | 889 | 904 | 905 |     |
| CONNECT | 890 | 923 |     |     |
| CONNECT | 891 | 895 | 903 |     |
| CONNECT | 892 | 893 | 904 |     |
| CONNECT | 893 | 892 | 905 |     |
| CONNECT | 894 | 853 | 923 |     |
| CONNECT | 895 | 891 | 896 | 897 |
| CONNECT | 896 | 895 |     |     |
| CONNECT | 897 | 895 | 898 | 899 |
| CONNECT | 898 | 897 |     |     |
| CONNECT | 899 | 897 | 900 | 901 |
| CONNECT | 900 | 899 |     |     |
| CONNECT | 901 | 899 | 902 | 903 |
| CONNECT | 902 | 901 |     |     |
| CONNECT | 903 | 901 | 891 | 904 |
| CONNECT | 904 | 889 | 892 | 903 |
| CONNECT | 905 | 889 | 893 | 906 |
| CONNECT | 906 | 905 | 907 | 921 |
| CONNECT | 907 | 906 | 908 | 909 |
| CONNECT | 908 | 907 |     |     |
| CONNECT | 909 | 907 | 910 | 911 |
| CONNECT | 910 | 909 |     |     |
| CONNECT | 911 | 909 | 912 | 920 |
| CONNECT | 912 | 911 | 913 | 914 |
| CONNECT | 913 | 912 |     |     |
| CONNECT | 914 | 912 | 915 | 916 |
| CONNECT | 915 | 914 |     |     |
| CONNECT | 916 | 914 | 917 | 918 |
| CONNECT | 917 | 916 |     |     |
| CONNECT | 918 | 916 | 919 | 920 |
| CONNECT | 919 | 918 |     |     |
| CONNECT | 920 | 911 | 918 | 921 |
| CONNECT | 921 | 906 | 920 | 922 |
| CONNECT | 922 | 921 |     |     |
| CONNECT | 923 | 890 | 894 |     |
| CONNECT | 924 | 930 | 965 |     |
| CONNECT | 925 | 940 | 941 |     |
| CONNECT | 926 | 959 |     |     |
| CONNECT | 927 | 931 | 939 |     |
| CONNECT | 928 | 929 | 940 |     |
| CONNECT | 929 | 928 | 941 |     |
| CONNECT | 930 | 924 | 959 |     |
| CONNECT | 931 | 927 | 932 | 933 |
| CONNECT | 932 | 931 |     |     |
| CONNECT | 933 | 931 | 934 | 935 |
| CONNECT | 934 | 933 |     |     |
| CONNECT | 935 | 933 | 936 | 937 |
| CONNECT | 936 | 935 |     |     |
| CONNECT | 937 | 935 | 938 | 939 |
| CONNECT | 938 | 937 |     |     |
| CONNECT | 939 | 927 | 937 | 940 |
| CONNECT | 940 | 925 | 928 | 939 |
| CONNECT | 941 | 925 | 929 | 942 |
| CONNECT | 942 | 941 | 943 | 957 |

|         |     |      |      |     |
|---------|-----|------|------|-----|
| CONNECT | 943 | 942  | 944  | 945 |
| CONNECT | 944 | 943  |      |     |
| CONNECT | 945 | 943  | 946  | 947 |
| CONNECT | 946 | 945  |      |     |
| CONNECT | 947 | 945  | 948  | 956 |
| CONNECT | 948 | 947  | 949  | 950 |
| CONNECT | 949 | 948  |      |     |
| CONNECT | 950 | 948  | 951  | 952 |
| CONNECT | 951 | 950  |      |     |
| CONNECT | 952 | 950  | 953  | 954 |
| CONNECT | 953 | 952  |      |     |
| CONNECT | 954 | 952  | 955  | 956 |
| CONNECT | 955 | 954  |      |     |
| CONNECT | 956 | 947  | 954  | 957 |
| CONNECT | 957 | 942  | 956  | 958 |
| CONNECT | 958 | 957  |      |     |
| CONNECT | 959 | 926  | 930  |     |
| CONNECT | 960 | 975  | 976  |     |
| CONNECT | 961 | 994  |      |     |
| CONNECT | 962 | 966  | 974  |     |
| CONNECT | 963 | 964  | 975  |     |
| CONNECT | 964 | 963  | 976  |     |
| CONNECT | 965 | 924  | 994  |     |
| CONNECT | 966 | 962  | 967  | 968 |
| CONNECT | 967 | 966  |      |     |
| CONNECT | 968 | 966  | 969  | 970 |
| CONNECT | 969 | 968  |      |     |
| CONNECT | 970 | 968  | 971  | 972 |
| CONNECT | 971 | 970  |      |     |
| CONNECT | 972 | 970  | 973  | 974 |
| CONNECT | 973 | 972  |      |     |
| CONNECT | 974 | 962  | 972  | 975 |
| CONNECT | 975 | 974  | 960  | 963 |
| CONNECT | 976 | 960  | 964  | 977 |
| CONNECT | 977 | 976  | 978  | 992 |
| CONNECT | 978 | 977  | 979  | 980 |
| CONNECT | 979 | 978  |      |     |
| CONNECT | 980 | 978  | 981  | 982 |
| CONNECT | 981 | 980  |      |     |
| CONNECT | 982 | 980  | 983  | 991 |
| CONNECT | 983 | 982  | 984  | 985 |
| CONNECT | 984 | 983  |      |     |
| CONNECT | 985 | 983  | 986  | 987 |
| CONNECT | 986 | 985  |      |     |
| CONNECT | 987 | 985  | 988  | 989 |
| CONNECT | 988 | 987  |      |     |
| CONNECT | 989 | 987  | 990  | 991 |
| CONNECT | 990 | 989  |      |     |
| CONNECT | 991 | 982  | 989  | 992 |
| CONNECT | 992 | 991  | 977  | 993 |
| CONNECT | 993 | 992  |      |     |
| CONNECT | 994 | 961  | 965  |     |
| CONNECT | 995 | 1001 | 1036 |     |
| CONNECT | 996 | 1011 | 1012 |     |
| CONNECT | 997 | 1030 |      |     |
| CONNECT | 998 | 1002 | 1010 |     |
| CONNECT | 999 | 1000 | 1011 |     |



CONNECT 1000 999 1012  
CONNECT 1001 995 1030  
CONNECT 1002 998 1003 1004  
CONNECT 1003 1002  
CONNECT 1004 1002 1005 1006  
CONNECT 1005 1004  
CONNECT 1006 1004 1007 1008  
CONNECT 1007 1006  
CONNECT 1008 1006 1009 1010  
CONNECT 1009 1008  
CONNECT 1010 998 1008 1011  
CONNECT 1011 996 999 1010  
CONNECT 1012 996 1000 1013  
CONNECT 1013 1012 1014 1028  
CONNECT 1014 1013 1015 1016  
CONNECT 1015 1014  
CONNECT 1016 1014 1017 1018  
CONNECT 1017 1016  
CONNECT 1018 1016 1019 1027  
CONNECT 1019 1018 1020 1021  
CONNECT 1020 1019  
CONNECT 1021 1019 1022 1023  
CONNECT 1022 1021  
CONNECT 1023 1021 1024 1025  
CONNECT 1024 1023  
CONNECT 1025 1023 1026 1027  
CONNECT 1026 1025  
CONNECT 1027 1018 1025 1028  
CONNECT 1028 1013 1027 1029  
CONNECT 1029 1028  
CONNECT 1030 997 1001  
CONNECT 1031 1046 1047  
CONNECT 1032 1065  
CONNECT 1033 1037 1045  
CONNECT 1034 1035 1046  
CONNECT 1035 1034 1047  
CONNECT 1036 995 1065  
CONNECT 1037 1033 1038 1039  
CONNECT 1038 1037  
CONNECT 1039 1037 1040 1041  
CONNECT 1040 1039  
CONNECT 1041 1039 1042 1043  
CONNECT 1042 1041  
CONNECT 1043 1041 1044 1045  
CONNECT 1044 1043  
CONNECT 1045 1043 1033 1046  
CONNECT 1046 1031 1045 1034  
CONNECT 1047 1031 1035 1048  
CONNECT 1048 1047 1049 1063  
CONNECT 1049 1048 1050 1051  
CONNECT 1050 1049  
CONNECT 1051 1049 1052 1053  
CONNECT 1052 1051  
CONNECT 1053 1051 1054 1062  
CONNECT 1054 1053 1055 1056  
CONNECT 1055 1054  
CONNECT 1056 1054 1057 1058

CONECT 1057 1056  
 CONECT 1058 1056 1059 1060  
 CONECT 1059 1058  
 CONECT 1060 1058 1061 1062  
 CONECT 1061 1060  
 CONECT 1062 1060 1053 1063  
 CONECT 1063 1048 1062 1064  
 CONECT 1064 1063  
 CONECT 1065 1032 1036

TITLE CSD ENTRY jmk-126-9-90kslow  
 REMARK 1 File created by GaussView 6.0.16  
 HETATM 1 Fe 0 18.380 6.240 0.757  
 Fe  
 HETATM 2 S 0 22.643 7.032 1.570  
 S  
 HETATM 3 S 0 17.251 8.932 4.482  
 S  
 HETATM 4 N 0 19.242 5.025 2.125  
 N  
 HETATM 5 N 0 20.219 7.028 0.793  
 N  
 HETATM 6 N 0 20.790 8.090 0.144  
 N  
 HETATM 7 N 0 17.855 7.422 2.205  
 N  
 HETATM 8 C 0 18.673 4.046 2.816  
 C  
 HETATM 9 H 0 17.744 3.888 2.703  
 H  
 HETATM 10 C 0 19.386 3.246 3.698  
 C  
 HETATM 11 H 0 18.946 2.540 4.158  
 H  
 HETATM 12 C 0 20.720 3.472 3.909  
 C  
 HETATM 13 H 0 21.216 2.928 4.509  
 H  
 HETATM 14 C 0 21.329 4.509 3.227  
 C  
 HETATM 15 H 0 22.250 4.701 3.360  
 H  
 HETATM 16 C 0 20.568 5.267 2.345  
 C  
 HETATM 17 C 0 21.051 6.389 1.575  
 C  
 HETATM 18 C 0 22.054 8.216 0.434  
 C  
 HETATM 19 C 0 22.947 9.241 -0.123  
 C  
 HETATM 20 C 0 22.423 10.314 -0.881  
 C  
 HETATM 21 H 0 21.484 10.385 -1.004  
 H  
 HETATM 22 C 0 23.240 11.240 -1.433  
 C

|        |    |   |   |        |        |        |
|--------|----|---|---|--------|--------|--------|
| HETATM | 23 | H | 0 | 22.866 | 11.958 | -1.930 |
| H      |    |   |   |        |        |        |
| HETATM | 24 | C | 0 | 24.651 | 11.155 | -1.281 |
| C      |    |   |   |        |        |        |
| HETATM | 25 | C | 0 | 25.538 | 12.085 | -1.862 |
| C      |    |   |   |        |        |        |
| HETATM | 26 | H | 0 | 25.191 | 12.809 | -2.371 |
| H      |    |   |   |        |        |        |
| HETATM | 27 | C | 0 | 26.895 | 11.959 | -1.704 |
| C      |    |   |   |        |        |        |
| HETATM | 28 | H | 0 | 27.476 | 12.596 | -2.103 |
| H      |    |   |   |        |        |        |
| HETATM | 29 | C | 0 | 27.434 | 10.893 | -0.955 |
| C      |    |   |   |        |        |        |
| HETATM | 30 | H | 0 | 28.374 | 10.814 | -0.850 |
| H      |    |   |   |        |        |        |
| HETATM | 31 | C | 0 | 26.604 | 9.974  | -0.381 |
| C      |    |   |   |        |        |        |
| HETATM | 32 | H | 0 | 26.973 | 9.259  | 0.121  |
| H      |    |   |   |        |        |        |
| HETATM | 33 | C | 0 | 25.192 | 10.075 | -0.528 |
| C      |    |   |   |        |        |        |
| HETATM | 34 | C | 0 | 24.314 | 9.138  | 0.042  |
| C      |    |   |   |        |        |        |
| HETATM | 35 | H | 0 | 24.668 | 8.418  | 0.552  |
| H      |    |   |   |        |        |        |
| HETATM | 36 | C | 0 | 17.614 | 8.050  | 3.134  |
| C      |    |   |   |        |        |        |
| HETATM | 37 | S | 0 | 14.117 | 5.447  | -0.057 |
| S      |    |   |   |        |        |        |
| HETATM | 38 | S | 0 | 19.509 | 3.547  | -2.970 |
| S      |    |   |   |        |        |        |
| HETATM | 39 | N | 0 | 17.518 | 7.455  | -0.613 |
| N      |    |   |   |        |        |        |
| HETATM | 40 | N | 0 | 16.541 | 5.451  | 0.719  |
| N      |    |   |   |        |        |        |
| HETATM | 41 | N | 0 | 15.970 | 4.389  | 1.368  |
| N      |    |   |   |        |        |        |
| HETATM | 42 | N | 0 | 18.905 | 5.058  | -0.693 |
| N      |    |   |   |        |        |        |
| HETATM | 43 | C | 0 | 18.087 | 8.433  | -1.303 |
| C      |    |   |   |        |        |        |
| HETATM | 44 | H | 0 | 19.017 | 8.592  | -1.190 |
| H      |    |   |   |        |        |        |
| HETATM | 45 | C | 0 | 17.374 | 9.233  | -2.185 |
| C      |    |   |   |        |        |        |
| HETATM | 46 | H | 0 | 17.814 | 9.939  | -2.646 |
| H      |    |   |   |        |        |        |
| HETATM | 47 | C | 0 | 16.040 | 9.007  | -2.397 |
| C      |    |   |   |        |        |        |
| HETATM | 48 | H | 0 | 15.545 | 9.551  | -2.997 |
| H      |    |   |   |        |        |        |
| HETATM | 49 | C | 0 | 15.431 | 7.970  | -1.715 |
| C      |    |   |   |        |        |        |
| HETATM | 50 | H | 0 | 14.511 | 7.778  | -1.848 |
| H      |    |   |   |        |        |        |

|        |    |    |   |        |        |        |
|--------|----|----|---|--------|--------|--------|
| HETATM | 51 | C  | 0 | 16.192 | 7.212  | -0.832 |
| C      |    |    |   |        |        |        |
| HETATM | 52 | C  | 0 | 15.709 | 6.090  | -0.063 |
| C      |    |    |   |        |        |        |
| HETATM | 53 | C  | 0 | 14.707 | 4.263  | 1.079  |
| C      |    |    |   |        |        |        |
| HETATM | 54 | C  | 0 | 13.813 | 3.238  | 1.636  |
| C      |    |    |   |        |        |        |
| HETATM | 55 | C  | 0 | 14.337 | 2.166  | 2.393  |
| C      |    |    |   |        |        |        |
| HETATM | 56 | H  | 0 | 15.277 | 2.094  | 2.516  |
| H      |    |    |   |        |        |        |
| HETATM | 57 | C  | 0 | 13.520 | 1.239  | 2.945  |
| C      |    |    |   |        |        |        |
| HETATM | 58 | H  | 0 | 13.895 | 0.521  | 3.442  |
| H      |    |    |   |        |        |        |
| HETATM | 59 | C  | 0 | 12.109 | 1.324  | 2.793  |
| C      |    |    |   |        |        |        |
| HETATM | 60 | C  | 0 | 11.222 | 0.394  | 3.375  |
| C      |    |    |   |        |        |        |
| HETATM | 61 | H  | 0 | 11.569 | -0.329 | 3.883  |
| H      |    |    |   |        |        |        |
| HETATM | 62 | C  | 0 | 9.866  | 0.521  | 3.217  |
| C      |    |    |   |        |        |        |
| HETATM | 63 | H  | 0 | 9.284  | -0.116 | 3.615  |
| H      |    |    |   |        |        |        |
| HETATM | 64 | C  | 0 | 9.327  | 1.587  | 2.467  |
| C      |    |    |   |        |        |        |
| HETATM | 65 | H  | 0 | 8.386  | 1.665  | 2.362  |
| H      |    |    |   |        |        |        |
| HETATM | 66 | C  | 0 | 10.157 | 2.504  | 1.893  |
| C      |    |    |   |        |        |        |
| HETATM | 67 | H  | 0 | 9.788  | 3.220  | 1.391  |
| H      |    |    |   |        |        |        |
| HETATM | 68 | C  | 0 | 11.568 | 2.404  | 2.040  |
| C      |    |    |   |        |        |        |
| HETATM | 69 | C  | 0 | 12.446 | 3.341  | 1.470  |
| C      |    |    |   |        |        |        |
| HETATM | 70 | H  | 0 | 12.093 | 4.061  | 0.960  |
| H      |    |    |   |        |        |        |
| HETATM | 71 | C  | 0 | 19.148 | 4.430  | -1.622 |
| C      |    |    |   |        |        |        |
| HETATM | 72 | Fe | 0 | 14.551 | -5.509 | 0.284  |
| Fe     |    |    |   |        |        |        |
| HETATM | 73 | S  | 0 | 18.813 | -4.717 | 1.098  |
| S      |    |    |   |        |        |        |
| HETATM | 74 | S  | 0 | 13.422 | -2.816 | 4.010  |
| S      |    |    |   |        |        |        |
| HETATM | 75 | N  | 0 | 15.413 | -6.724 | 1.653  |
| N      |    |    |   |        |        |        |
| HETATM | 76 | N  | 0 | 16.390 | -4.720 | 0.321  |
| N      |    |    |   |        |        |        |
| HETATM | 77 | N  | 0 | 16.961 | -3.658 | -0.327 |
| N      |    |    |   |        |        |        |
| HETATM | 78 | N  | 0 | 14.026 | -4.326 | 1.734  |
| N      |    |    |   |        |        |        |

|        |     |   |   |        |        |        |
|--------|-----|---|---|--------|--------|--------|
| HETATM | 79  | C | 0 | 14.844 | -7.701 | 2.344  |
| C      |     |   |   |        |        |        |
| HETATM | 80  | H | 0 | 13.914 | -7.861 | 2.231  |
| H      |     |   |   |        |        |        |
| HETATM | 81  | C | 0 | 15.556 | -8.503 | 3.226  |
| C      |     |   |   |        |        |        |
| HETATM | 82  | H | 0 | 15.116 | -9.209 | 3.686  |
| H      |     |   |   |        |        |        |
| HETATM | 83  | C | 0 | 16.890 | -8.277 | 3.438  |
| C      |     |   |   |        |        |        |
| HETATM | 84  | H | 0 | 17.386 | -8.821 | 4.037  |
| H      |     |   |   |        |        |        |
| HETATM | 85  | C | 0 | 17.499 | -7.240 | 2.756  |
| C      |     |   |   |        |        |        |
| HETATM | 86  | H | 0 | 18.420 | -7.047 | 2.889  |
| H      |     |   |   |        |        |        |
| HETATM | 87  | C | 0 | 16.738 | -6.482 | 1.873  |
| C      |     |   |   |        |        |        |
| HETATM | 88  | C | 0 | 17.222 | -5.360 | 1.104  |
| C      |     |   |   |        |        |        |
| HETATM | 89  | C | 0 | 18.224 | -3.533 | -0.038 |
| C      |     |   |   |        |        |        |
| HETATM | 90  | C | 0 | 19.118 | -2.507 | -0.596 |
| C      |     |   |   |        |        |        |
| HETATM | 91  | C | 0 | 18.594 | -1.435 | -1.352 |
| C      |     |   |   |        |        |        |
| HETATM | 92  | H | 0 | 17.654 | -1.364 | -1.475 |
| H      |     |   |   |        |        |        |
| HETATM | 93  | C | 0 | 19.410 | -0.509 | -1.905 |
| C      |     |   |   |        |        |        |
| HETATM | 94  | H | 0 | 19.036 | 0.210  | -2.401 |
| H      |     |   |   |        |        |        |
| HETATM | 95  | C | 0 | 20.821 | -0.594 | -1.753 |
| C      |     |   |   |        |        |        |
| HETATM | 96  | C | 0 | 21.709 | 0.336  | -2.335 |
| C      |     |   |   |        |        |        |
| HETATM | 97  | H | 0 | 21.362 | 1.060  | -2.842 |
| H      |     |   |   |        |        |        |
| HETATM | 98  | C | 0 | 23.065 | 0.210  | -2.176 |
| C      |     |   |   |        |        |        |
| HETATM | 99  | H | 0 | 23.647 | 0.847  | -2.574 |
| H      |     |   |   |        |        |        |
| HETATM | 100 | C | 0 | 23.604 | -0.856 | -1.427 |
| C      |     |   |   |        |        |        |
| HETATM | 101 | H | 0 | 24.545 | -0.934 | -1.321 |
| H      |     |   |   |        |        |        |
| HETATM | 102 | C | 0 | 22.774 | -1.774 | -0.853 |
| C      |     |   |   |        |        |        |
| HETATM | 103 | H | 0 | 23.143 | -2.490 | -0.350 |
| H      |     |   |   |        |        |        |
| HETATM | 104 | C | 0 | 21.363 | -1.673 | -1.000 |
| C      |     |   |   |        |        |        |
| HETATM | 105 | C | 0 | 20.484 | -2.611 | -0.429 |
| C      |     |   |   |        |        |        |
| HETATM | 106 | H | 0 | 20.838 | -3.331 | 0.081  |
| H      |     |   |   |        |        |        |

|        |     |   |   |        |         |        |
|--------|-----|---|---|--------|---------|--------|
| HETATM | 107 | C | 0 | 13.783 | -3.699  | 2.662  |
| C      |     |   |   |        |         |        |
| HETATM | 108 | S | 0 | 10.288 | -6.301  | -0.530 |
| S      |     |   |   |        |         |        |
| HETATM | 109 | S | 0 | 15.680 | -8.202  | -3.441 |
| S      |     |   |   |        |         |        |
| HETATM | 110 | N | 0 | 13.689 | -4.294  | -1.084 |
| N      |     |   |   |        |         |        |
| HETATM | 111 | N | 0 | 12.712 | -6.297  | 0.248  |
| N      |     |   |   |        |         |        |
| HETATM | 112 | N | 0 | 12.141 | -7.360  | 0.896  |
| N      |     |   |   |        |         |        |
| HETATM | 113 | N | 0 | 15.076 | -6.691  | -1.165 |
| N      |     |   |   |        |         |        |
| HETATM | 114 | C | 0 | 14.258 | -3.316  | -1.775 |
| C      |     |   |   |        |         |        |
| HETATM | 115 | H | 0 | 15.187 | -3.157  | -1.663 |
| H      |     |   |   |        |         |        |
| HETATM | 116 | C | 0 | 13.545 | -2.515  | -2.658 |
| C      |     |   |   |        |         |        |
| HETATM | 117 | H | 0 | 13.985 | -1.809  | -3.117 |
| H      |     |   |   |        |         |        |
| HETATM | 118 | C | 0 | 12.211 | -2.741  | -2.868 |
| C      |     |   |   |        |         |        |
| HETATM | 119 | H | 0 | 11.714 | -2.198  | -3.468 |
| H      |     |   |   |        |         |        |
| HETATM | 120 | C | 0 | 11.602 | -3.779  | -2.187 |
| C      |     |   |   |        |         |        |
| HETATM | 121 | H | 0 | 10.681 | -3.971  | -2.320 |
| H      |     |   |   |        |         |        |
| HETATM | 122 | C | 0 | 12.363 | -4.536  | -1.304 |
| C      |     |   |   |        |         |        |
| HETATM | 123 | C | 0 | 11.879 | -5.659  | -0.535 |
| C      |     |   |   |        |         |        |
| HETATM | 124 | C | 0 | 10.876 | -7.486  | 0.606  |
| C      |     |   |   |        |         |        |
| HETATM | 125 | C | 0 | 9.983  | -8.511  | 1.164  |
| C      |     |   |   |        |         |        |
| HETATM | 126 | C | 0 | 10.508 | -9.583  | 1.922  |
| C      |     |   |   |        |         |        |
| HETATM | 127 | H | 0 | 11.446 | -9.655  | 2.044  |
| H      |     |   |   |        |         |        |
| HETATM | 128 | C | 0 | 9.691  | -10.510 | 2.473  |
| C      |     |   |   |        |         |        |
| HETATM | 129 | H | 0 | 10.065 | -11.227 | 2.970  |
| H      |     |   |   |        |         |        |
| HETATM | 130 | C | 0 | 8.280  | -10.425 | 2.322  |
| C      |     |   |   |        |         |        |
| HETATM | 131 | C | 0 | 7.393  | -11.354 | 2.903  |
| C      |     |   |   |        |         |        |
| HETATM | 132 | H | 0 | 7.740  | -12.078 | 3.412  |
| H      |     |   |   |        |         |        |
| HETATM | 133 | C | 0 | 6.036  | -11.227 | 2.745  |
| C      |     |   |   |        |         |        |
| HETATM | 134 | H | 0 | 5.455  | -11.865 | 3.143  |
| H      |     |   |   |        |         |        |

|        |     |    |   |        |         |        |
|--------|-----|----|---|--------|---------|--------|
| HETATM | 135 | C  | 0 | 5.497  | -10.162 | 1.996  |
| C      |     |    |   |        |         |        |
| HETATM | 136 | H  | 0 | 4.557  | -10.084 | 1.890  |
| H      |     |    |   |        |         |        |
| HETATM | 137 | C  | 0 | 6.327  | -9.243  | 1.422  |
| C      |     |    |   |        |         |        |
| HETATM | 138 | H  | 0 | 5.957  | -8.528  | 0.920  |
| H      |     |    |   |        |         |        |
| HETATM | 139 | C  | 0 | 7.739  | -9.345  | 1.569  |
| C      |     |    |   |        |         |        |
| HETATM | 140 | C  | 0 | 8.617  | -8.407  | 0.998  |
| C      |     |    |   |        |         |        |
| HETATM | 141 | H  | 0 | 8.262  | -7.688  | 0.489  |
| H      |     |    |   |        |         |        |
| HETATM | 142 | C  | 0 | 15.317 | -7.319  | -2.093 |
| C      |     |    |   |        |         |        |
| HETATM | 143 | Fe | 0 | 10.721 | -17.258 | -0.187 |
| Fe     |     |    |   |        |         |        |
| HETATM | 144 | S  | 0 | 14.984 | -16.466 | 0.627  |
| S      |     |    |   |        |         |        |
| HETATM | 145 | S  | 0 | 9.592  | -14.565 | 3.539  |
| S      |     |    |   |        |         |        |
| HETATM | 146 | N  | 0 | 11.583 | -18.472 | 1.181  |
| N      |     |    |   |        |         |        |
| HETATM | 147 | N  | 0 | 12.560 | -16.469 | -0.151 |
| N      |     |    |   |        |         |        |
| HETATM | 148 | N  | 0 | 13.131 | -15.406 | -0.799 |
| N      |     |    |   |        |         |        |
| HETATM | 149 | N  | 0 | 10.195 | -16.075 | 1.263  |
| N      |     |    |   |        |         |        |
| HETATM | 150 | C  | 0 | 11.015 | -19.450 | 1.872  |
| C      |     |    |   |        |         |        |
| HETATM | 151 | H  | 0 | 10.084 | -19.610 | 1.760  |
| H      |     |    |   |        |         |        |
| HETATM | 152 | C  | 0 | 11.726 | -20.252 | 2.755  |
| C      |     |    |   |        |         |        |
| HETATM | 153 | H  | 0 | 11.287 | -20.958 | 3.215  |
| H      |     |    |   |        |         |        |
| HETATM | 154 | C  | 0 | 13.060 | -20.025 | 2.965  |
| C      |     |    |   |        |         |        |
| HETATM | 155 | H  | 0 | 13.556 | -20.570 | 3.565  |
| H      |     |    |   |        |         |        |
| HETATM | 156 | C  | 0 | 13.670 | -18.988 | 2.285  |
| C      |     |    |   |        |         |        |
| HETATM | 157 | H  | 0 | 14.591 | -18.795 | 2.417  |
| H      |     |    |   |        |         |        |
| HETATM | 158 | C  | 0 | 12.909 | -18.231 | 1.401  |
| C      |     |    |   |        |         |        |
| HETATM | 159 | C  | 0 | 13.392 | -17.109 | 0.632  |
| C      |     |    |   |        |         |        |
| HETATM | 160 | C  | 0 | 14.395 | -15.281 | -0.509 |
| C      |     |    |   |        |         |        |
| HETATM | 161 | C  | 0 | 15.289 | -14.255 | -1.067 |
| C      |     |    |   |        |         |        |
| HETATM | 162 | C  | 0 | 14.764 | -13.184 | -1.824 |
| C      |     |    |   |        |         |        |

|        |     |   |   |        |         |        |
|--------|-----|---|---|--------|---------|--------|
| HETATM | 163 | H | 0 | 13.825 | -13.112 | -1.947 |
| H      |     |   |   |        |         |        |
| HETATM | 164 | C | 0 | 15.580 | -12.257 | -2.376 |
| C      |     |   |   |        |         |        |
| HETATM | 165 | H | 0 | 15.206 | -11.539 | -2.873 |
| H      |     |   |   |        |         |        |
| HETATM | 166 | C | 0 | 16.992 | -12.342 | -2.225 |
| C      |     |   |   |        |         |        |
| HETATM | 167 | C | 0 | 17.879 | -11.413 | -2.806 |
| C      |     |   |   |        |         |        |
| HETATM | 168 | H | 0 | 17.532 | -10.689 | -3.314 |
| H      |     |   |   |        |         |        |
| HETATM | 169 | C | 0 | 19.236 | -11.539 | -2.648 |
| C      |     |   |   |        |         |        |
| HETATM | 170 | H | 0 | 19.817 | -10.902 | -3.046 |
| H      |     |   |   |        |         |        |
| HETATM | 171 | C | 0 | 19.774 | -12.605 | -1.898 |
| C      |     |   |   |        |         |        |
| HETATM | 172 | H | 0 | 20.715 | -12.683 | -1.793 |
| H      |     |   |   |        |         |        |
| HETATM | 173 | C | 0 | 18.944 | -13.523 | -1.325 |
| C      |     |   |   |        |         |        |
| HETATM | 174 | H | 0 | 19.314 | -14.238 | -0.822 |
| H      |     |   |   |        |         |        |
| HETATM | 175 | C | 0 | 17.532 | -13.421 | -1.471 |
| C      |     |   |   |        |         |        |
| HETATM | 176 | C | 0 | 16.655 | -14.360 | -0.902 |
| C      |     |   |   |        |         |        |
| HETATM | 177 | H | 0 | 17.009 | -15.078 | -0.392 |
| H      |     |   |   |        |         |        |
| HETATM | 178 | C | 0 | 9.954  | -15.448 | 2.191  |
| C      |     |   |   |        |         |        |
| HETATM | 179 | S | 0 | 6.458  | -18.049 | -1.001 |
| S      |     |   |   |        |         |        |
| HETATM | 180 | S | 0 | 11.851 | -19.950 | -3.914 |
| S      |     |   |   |        |         |        |
| HETATM | 181 | N | 0 | 9.859  | -16.043 | -1.555 |
| N      |     |   |   |        |         |        |
| HETATM | 182 | N | 0 | 8.882  | -18.046 | -0.223 |
| N      |     |   |   |        |         |        |
| HETATM | 183 | N | 0 | 8.311  | -19.109 | 0.425  |
| N      |     |   |   |        |         |        |
| HETATM | 184 | N | 0 | 11.246 | -18.440 | -1.637 |
| N      |     |   |   |        |         |        |
| HETATM | 185 | C | 0 | 10.428 | -15.065 | -2.247 |
| C      |     |   |   |        |         |        |
| HETATM | 186 | H | 0 | 11.358 | -14.906 | -2.134 |
| H      |     |   |   |        |         |        |
| HETATM | 187 | C | 0 | 9.716  | -14.263 | -3.129 |
| C      |     |   |   |        |         |        |
| HETATM | 188 | H | 0 | 10.156 | -13.558 | -3.589 |
| H      |     |   |   |        |         |        |
| HETATM | 189 | C | 0 | 8.382  | -14.490 | -3.340 |
| C      |     |   |   |        |         |        |
| HETATM | 190 | H | 0 | 7.885  | -13.946 | -3.940 |
| H      |     |   |   |        |         |        |



|        |     |    |   |        |         |        |
|--------|-----|----|---|--------|---------|--------|
| HETATM | 191 | C  | 0 | 7.773  | -15.527 | -2.659 |
| C      |     |    |   |        |         |        |
| HETATM | 192 | H  | 0 | 6.851  | -15.720 | -2.791 |
| H      |     |    |   |        |         |        |
| HETATM | 193 | C  | 0 | 8.534  | -16.284 | -1.776 |
| C      |     |    |   |        |         |        |
| HETATM | 194 | C  | 0 | 8.050  | -17.407 | -1.007 |
| C      |     |    |   |        |         |        |
| HETATM | 195 | C  | 0 | 7.047  | -19.234 | 0.135  |
| C      |     |    |   |        |         |        |
| HETATM | 196 | C  | 0 | 6.153  | -20.260 | 0.692  |
| C      |     |    |   |        |         |        |
| HETATM | 197 | C  | 0 | 6.679  | -21.332 | 1.449  |
| C      |     |    |   |        |         |        |
| HETATM | 198 | H  | 0 | 7.617  | -21.403 | 1.572  |
| H      |     |    |   |        |         |        |
| HETATM | 199 | C  | 0 | 5.862  | -22.258 | 2.002  |
| C      |     |    |   |        |         |        |
| HETATM | 200 | H  | 0 | 6.235  | -22.976 | 2.499  |
| H      |     |    |   |        |         |        |
| HETATM | 201 | C  | 0 | 4.451  | -22.174 | 1.850  |
| C      |     |    |   |        |         |        |
| HETATM | 202 | C  | 0 | 3.562  | -23.102 | 2.431  |
| C      |     |    |   |        |         |        |
| HETATM | 203 | H  | 0 | 3.910  | -23.826 | 2.939  |
| H      |     |    |   |        |         |        |
| HETATM | 204 | C  | 0 | 2.206  | -22.976 | 2.273  |
| C      |     |    |   |        |         |        |
| HETATM | 205 | H  | 0 | 1.624  | -23.613 | 2.672  |
| H      |     |    |   |        |         |        |
| HETATM | 206 | C  | 0 | 1.668  | -21.910 | 1.524  |
| C      |     |    |   |        |         |        |
| HETATM | 207 | H  | 0 | 0.728  | -21.832 | 1.419  |
| H      |     |    |   |        |         |        |
| HETATM | 208 | C  | 0 | 2.497  | -20.992 | 0.951  |
| C      |     |    |   |        |         |        |
| HETATM | 209 | H  | 0 | 2.128  | -20.276 | 0.447  |
| H      |     |    |   |        |         |        |
| HETATM | 210 | C  | 0 | 3.909  | -21.094 | 1.097  |
| C      |     |    |   |        |         |        |
| HETATM | 211 | C  | 0 | 4.787  | -20.156 | 0.527  |
| C      |     |    |   |        |         |        |
| HETATM | 212 | H  | 0 | 4.433  | -19.437 | 0.017  |
| H      |     |    |   |        |         |        |
| HETATM | 213 | C  | 0 | 11.488 | -19.067 | -2.565 |
| C      |     |    |   |        |         |        |
| HETATM | 214 | Fe | 0 | 11.105 | 8.994   | 0.614  |
| Fe     |     |    |   |        |         |        |
| HETATM | 215 | S  | 0 | 15.368 | 9.786   | 1.428  |
| S      |     |    |   |        |         |        |
| HETATM | 216 | S  | 0 | 9.975  | 11.687  | 4.340  |
| S      |     |    |   |        |         |        |
| HETATM | 217 | N  | 0 | 11.967 | 7.780   | 1.982  |
| N      |     |    |   |        |         |        |
| HETATM | 218 | N  | 0 | 12.943 | 9.782   | 0.650  |
| N      |     |    |   |        |         |        |

|        |     |   |   |        |        |        |
|--------|-----|---|---|--------|--------|--------|
| HETATM | 219 | N | 0 | 13.514 | 10.845 | 0.002  |
| N      |     |   |   |        |        |        |
| HETATM | 220 | N | 0 | 10.580 | 10.177 | 2.063  |
| N      |     |   |   |        |        |        |
| HETATM | 221 | C | 0 | 11.398 | 6.801  | 2.674  |
| C      |     |   |   |        |        |        |
| HETATM | 222 | H | 0 | 10.468 | 6.642  | 2.561  |
| H      |     |   |   |        |        |        |
| HETATM | 223 | C | 0 | 12.110 | 6.000  | 3.556  |
| C      |     |   |   |        |        |        |
| HETATM | 224 | H | 0 | 11.670 | 5.295  | 4.015  |
| H      |     |   |   |        |        |        |
| HETATM | 225 | C | 0 | 13.444 | 6.227  | 3.767  |
| C      |     |   |   |        |        |        |
| HETATM | 226 | H | 0 | 13.940 | 5.682  | 4.367  |
| H      |     |   |   |        |        |        |
| HETATM | 227 | C | 0 | 14.054 | 7.264  | 3.085  |
| C      |     |   |   |        |        |        |
| HETATM | 228 | H | 0 | 14.974 | 7.456  | 3.218  |
| H      |     |   |   |        |        |        |
| HETATM | 229 | C | 0 | 13.293 | 8.021  | 2.203  |
| C      |     |   |   |        |        |        |
| HETATM | 230 | C | 0 | 13.776 | 9.144  | 1.433  |
| C      |     |   |   |        |        |        |
| HETATM | 231 | C | 0 | 14.778 | 10.970 | 0.292  |
| C      |     |   |   |        |        |        |
| HETATM | 232 | C | 0 | 15.673 | 11.996 | -0.266 |
| C      |     |   |   |        |        |        |
| HETATM | 233 | C | 0 | 15.147 | 13.069 | -1.023 |
| C      |     |   |   |        |        |        |
| HETATM | 234 | H | 0 | 14.209 | 13.140 | -1.146 |
| H      |     |   |   |        |        |        |
| HETATM | 235 | C | 0 | 15.964 | 13.995 | -1.576 |
| C      |     |   |   |        |        |        |
| HETATM | 236 | H | 0 | 15.590 | 14.712 | -2.072 |
| H      |     |   |   |        |        |        |
| HETATM | 237 | C | 0 | 17.375 | 13.910 | -1.423 |
| C      |     |   |   |        |        |        |
| HETATM | 238 | C | 0 | 18.263 | 14.839 | -2.004 |
| C      |     |   |   |        |        |        |
| HETATM | 239 | H | 0 | 17.916 | 15.563 | -2.513 |
| H      |     |   |   |        |        |        |
| HETATM | 240 | C | 0 | 19.620 | 14.713 | -1.846 |
| C      |     |   |   |        |        |        |
| HETATM | 241 | H | 0 | 20.202 | 15.350 | -2.245 |
| H      |     |   |   |        |        |        |
| HETATM | 242 | C | 0 | 20.158 | 13.647 | -1.098 |
| C      |     |   |   |        |        |        |
| HETATM | 243 | H | 0 | 21.099 | 13.569 | -0.992 |
| H      |     |   |   |        |        |        |
| HETATM | 244 | C | 0 | 19.328 | 12.729 | -0.524 |
| C      |     |   |   |        |        |        |
| HETATM | 245 | H | 0 | 19.698 | 12.013 | -0.021 |
| H      |     |   |   |        |        |        |
| HETATM | 246 | C | 0 | 17.916 | 12.830 | -0.671 |
| C      |     |   |   |        |        |        |

|        |     |   |   |        |        |        |
|--------|-----|---|---|--------|--------|--------|
| HETATM | 247 | C | 0 | 17.039 | 11.892 | -0.100 |
| C      |     |   |   |        |        |        |
| HETATM | 248 | H | 0 | 17.393 | 11.173 | 0.410  |
| H      |     |   |   |        |        |        |
| HETATM | 249 | C | 0 | 10.338 | 10.804 | 2.992  |
| C      |     |   |   |        |        |        |
| HETATM | 250 | S | 0 | 6.842  | 8.202  | -0.200 |
| S      |     |   |   |        |        |        |
| HETATM | 251 | S | 0 | 12.234 | 6.301  | -3.112 |
| S      |     |   |   |        |        |        |
| HETATM | 252 | N | 0 | 10.243 | 10.209 | -0.755 |
| N      |     |   |   |        |        |        |
| HETATM | 253 | N | 0 | 9.267  | 8.206  | 0.577  |
| N      |     |   |   |        |        |        |
| HETATM | 254 | N | 0 | 8.695  | 7.143  | 1.225  |
| N      |     |   |   |        |        |        |
| HETATM | 255 | N | 0 | 11.630 | 7.812  | -0.835 |
| N      |     |   |   |        |        |        |
| HETATM | 256 | C | 0 | 10.811 | 11.187 | -1.445 |
| C      |     |   |   |        |        |        |
| HETATM | 257 | H | 0 | 11.742 | 11.346 | -1.332 |
| H      |     |   |   |        |        |        |
| HETATM | 258 | C | 0 | 10.100 | 11.988 | -2.328 |
| C      |     |   |   |        |        |        |
| HETATM | 259 | H | 0 | 10.539 | 12.693 | -2.788 |
| H      |     |   |   |        |        |        |
| HETATM | 260 | C | 0 | 8.766  | 11.761 | -2.539 |
| C      |     |   |   |        |        |        |
| HETATM | 261 | H | 0 | 8.269  | 12.306 | -3.139 |
| H      |     |   |   |        |        |        |
| HETATM | 262 | C | 0 | 8.156  | 10.724 | -1.858 |
| C      |     |   |   |        |        |        |
| HETATM | 263 | H | 0 | 7.235  | 10.532 | -1.991 |
| H      |     |   |   |        |        |        |
| HETATM | 264 | C | 0 | 8.917  | 9.967  | -0.974 |
| C      |     |   |   |        |        |        |
| HETATM | 265 | C | 0 | 8.434  | 8.845  | -0.205 |
| C      |     |   |   |        |        |        |
| HETATM | 266 | C | 0 | 7.431  | 7.017  | 0.937  |
| C      |     |   |   |        |        |        |
| HETATM | 267 | C | 0 | 6.537  | 5.992  | 1.494  |
| C      |     |   |   |        |        |        |
| HETATM | 268 | C | 0 | 7.063  | 4.920  | 2.251  |
| C      |     |   |   |        |        |        |
| HETATM | 269 | H | 0 | 8.001  | 4.848  | 2.374  |
| H      |     |   |   |        |        |        |
| HETATM | 270 | C | 0 | 6.245  | 3.993  | 2.803  |
| C      |     |   |   |        |        |        |
| HETATM | 271 | H | 0 | 6.620  | 3.276  | 3.300  |
| H      |     |   |   |        |        |        |
| HETATM | 272 | C | 0 | 4.835  | 4.079  | 2.651  |
| C      |     |   |   |        |        |        |
| HETATM | 273 | C | 0 | 3.946  | 3.149  | 3.233  |
| C      |     |   |   |        |        |        |
| HETATM | 274 | H | 0 | 4.294  | 2.426  | 3.741  |
| H      |     |   |   |        |        |        |

|        |     |    |   |        |        |        |
|--------|-----|----|---|--------|--------|--------|
| HETATM | 275 | C  | 0 | 2.590  | 3.276  | 3.075  |
| C      |     |    |   |        |        |        |
| HETATM | 276 | H  | 0 | 2.008  | 2.639  | 3.473  |
| H      |     |    |   |        |        |        |
| HETATM | 277 | C  | 0 | 2.052  | 4.341  | 2.325  |
| C      |     |    |   |        |        |        |
| HETATM | 278 | H  | 0 | 1.110  | 4.419  | 2.219  |
| H      |     |    |   |        |        |        |
| HETATM | 279 | C  | 0 | 2.881  | 5.259  | 1.751  |
| C      |     |    |   |        |        |        |
| HETATM | 280 | H  | 0 | 2.512  | 5.975  | 1.249  |
| H      |     |    |   |        |        |        |
| HETATM | 281 | C  | 0 | 4.293  | 5.158  | 1.898  |
| C      |     |    |   |        |        |        |
| HETATM | 282 | C  | 0 | 5.171  | 6.096  | 1.328  |
| C      |     |    |   |        |        |        |
| HETATM | 283 | H  | 0 | 4.817  | 6.815  | 0.818  |
| H      |     |    |   |        |        |        |
| HETATM | 284 | C  | 0 | 11.872 | 7.185  | -1.764 |
| C      |     |    |   |        |        |        |
| HETATM | 285 | Fe | 0 | 7.275  | -2.754 | 0.142  |
| Fe     |     |    |   |        |        |        |
| HETATM | 286 | S  | 0 | 11.538 | -1.962 | 0.956  |
| S      |     |    |   |        |        |        |
| HETATM | 287 | S  | 0 | 6.146  | -0.062 | 3.868  |
| S      |     |    |   |        |        |        |
| HETATM | 288 | N  | 0 | 8.137  | -3.969 | 1.511  |
| N      |     |    |   |        |        |        |
| HETATM | 289 | N  | 0 | 9.114  | -1.966 | 0.179  |
| N      |     |    |   |        |        |        |
| HETATM | 290 | N  | 0 | 9.685  | -0.903 | -0.469 |
| N      |     |    |   |        |        |        |
| HETATM | 291 | N  | 0 | 6.750  | -1.572 | 1.592  |
| N      |     |    |   |        |        |        |
| HETATM | 292 | C  | 0 | 7.568  | -4.947 | 2.201  |
| C      |     |    |   |        |        |        |
| HETATM | 293 | H  | 0 | 6.638  | -5.106 | 2.089  |
| H      |     |    |   |        |        |        |
| HETATM | 294 | C  | 0 | 8.281  | -5.748 | 3.084  |
| C      |     |    |   |        |        |        |
| HETATM | 295 | H  | 0 | 7.841  | -6.454 | 3.544  |
| H      |     |    |   |        |        |        |
| HETATM | 296 | C  | 0 | 9.615  | -5.522 | 3.295  |
| C      |     |    |   |        |        |        |
| HETATM | 297 | H  | 0 | 10.111 | -6.066 | 3.895  |
| H      |     |    |   |        |        |        |
| HETATM | 298 | C  | 0 | 10.224 | -4.485 | 2.614  |
| C      |     |    |   |        |        |        |
| HETATM | 299 | H  | 0 | 11.145 | -4.292 | 2.747  |
| H      |     |    |   |        |        |        |
| HETATM | 300 | C  | 0 | 9.463  | -3.727 | 1.730  |
| C      |     |    |   |        |        |        |
| HETATM | 301 | C  | 0 | 9.946  | -2.605 | 0.962  |
| C      |     |    |   |        |        |        |
| HETATM | 302 | C  | 0 | 10.949 | -0.778 | -0.180 |
| C      |     |    |   |        |        |        |

|        |     |   |   |        |        |        |
|--------|-----|---|---|--------|--------|--------|
| HETATM | 303 | C | 0 | 11.843 | 0.247  | -0.738 |
| C      |     |   |   |        |        |        |
| HETATM | 304 | C | 0 | 11.318 | 1.320  | -1.494 |
| C      |     |   |   |        |        |        |
| HETATM | 305 | H | 0 | 10.379 | 1.391  | -1.617 |
| H      |     |   |   |        |        |        |
| HETATM | 306 | C | 0 | 12.135 | 2.246  | -2.047 |
| C      |     |   |   |        |        |        |
| HETATM | 307 | H | 0 | 11.761 | 2.964  | -2.543 |
| H      |     |   |   |        |        |        |
| HETATM | 308 | C | 0 | 13.545 | 2.161  | -1.895 |
| C      |     |   |   |        |        |        |
| HETATM | 309 | C | 0 | 14.434 | 3.090  | -2.477 |
| C      |     |   |   |        |        |        |
| HETATM | 310 | H | 0 | 14.087 | 3.814  | -2.984 |
| H      |     |   |   |        |        |        |
| HETATM | 311 | C | 0 | 15.790 | 2.964  | -2.318 |
| C      |     |   |   |        |        |        |
| HETATM | 312 | H | 0 | 16.372 | 3.601  | -2.716 |
| H      |     |   |   |        |        |        |
| HETATM | 313 | C | 0 | 16.328 | 1.898  | -1.569 |
| C      |     |   |   |        |        |        |
| HETATM | 314 | H | 0 | 17.269 | 1.820  | -1.463 |
| H      |     |   |   |        |        |        |
| HETATM | 315 | C | 0 | 15.499 | 0.980  | -0.995 |
| C      |     |   |   |        |        |        |
| HETATM | 316 | H | 0 | 15.868 | 0.264  | -0.493 |
| H      |     |   |   |        |        |        |
| HETATM | 317 | C | 0 | 14.087 | 1.082  | -1.142 |
| C      |     |   |   |        |        |        |
| HETATM | 318 | C | 0 | 13.209 | 0.144  | -0.571 |
| C      |     |   |   |        |        |        |
| HETATM | 319 | H | 0 | 13.563 | -0.576 | -0.062 |
| H      |     |   |   |        |        |        |
| HETATM | 320 | C | 0 | 6.508  | -0.945 | 2.520  |
| C      |     |   |   |        |        |        |
| HETATM | 321 | S | 0 | 3.013  | -3.546 | -0.672 |
| S      |     |   |   |        |        |        |
| HETATM | 322 | S | 0 | 8.404  | -5.448 | -3.583 |
| S      |     |   |   |        |        |        |
| HETATM | 323 | N | 0 | 6.413  | -1.540 | -1.226 |
| N      |     |   |   |        |        |        |
| HETATM | 324 | N | 0 | 5.436  | -3.543 | 0.106  |
| N      |     |   |   |        |        |        |
| HETATM | 325 | N | 0 | 4.866  | -4.606 | 0.754  |
| N      |     |   |   |        |        |        |
| HETATM | 326 | N | 0 | 7.801  | -3.937 | -1.307 |
| N      |     |   |   |        |        |        |
| HETATM | 327 | C | 0 | 6.982  | -0.562 | -1.917 |
| C      |     |   |   |        |        |        |
| HETATM | 328 | H | 0 | 7.913  | -0.402 | -1.805 |
| H      |     |   |   |        |        |        |
| HETATM | 329 | C | 0 | 6.271  | 0.240  | -2.800 |
| C      |     |   |   |        |        |        |
| HETATM | 330 | H | 0 | 6.709  | 0.946  | -3.259 |
| H      |     |   |   |        |        |        |

|        |     |    |   |        |         |        |
|--------|-----|----|---|--------|---------|--------|
| HETATM | 331 | C  | 0 | 4.937  | 0.013   | -3.010 |
| C      |     |    |   |        |         |        |
| HETATM | 332 | H  | 0 | 4.440  | 0.557   | -3.611 |
| H      |     |    |   |        |         |        |
| HETATM | 333 | C  | 0 | 4.326  | -1.025  | -2.329 |
| C      |     |    |   |        |         |        |
| HETATM | 334 | H  | 0 | 3.406  | -1.217  | -2.462 |
| H      |     |    |   |        |         |        |
| HETATM | 335 | C  | 0 | 5.087  | -1.782  | -1.447 |
| C      |     |    |   |        |         |        |
| HETATM | 336 | C  | 0 | 4.604  | -2.904  | -0.677 |
| C      |     |    |   |        |         |        |
| HETATM | 337 | C  | 0 | 3.602  | -4.731  | 0.464  |
| C      |     |    |   |        |         |        |
| HETATM | 338 | C  | 0 | 2.708  | -5.757  | 1.022  |
| C      |     |    |   |        |         |        |
| HETATM | 339 | C  | 0 | 3.232  | -6.829  | 1.779  |
| C      |     |    |   |        |         |        |
| HETATM | 340 | H  | 0 | 4.171  | -6.901  | 1.902  |
| H      |     |    |   |        |         |        |
| HETATM | 341 | C  | 0 | 2.416  | -7.755  | 2.331  |
| C      |     |    |   |        |         |        |
| HETATM | 342 | H  | 0 | 2.790  | -8.473  | 2.828  |
| H      |     |    |   |        |         |        |
| HETATM | 343 | C  | 0 | 1.004  | -7.670  | 2.179  |
| C      |     |    |   |        |         |        |
| HETATM | 344 | C  | 0 | 0.117  | -8.599  | 2.761  |
| C      |     |    |   |        |         |        |
| HETATM | 345 | H  | 0 | 0.464  | -9.323  | 3.269  |
| H      |     |    |   |        |         |        |
| HETATM | 346 | C  | 0 | -1.239 | -8.473  | 2.602  |
| C      |     |    |   |        |         |        |
| HETATM | 347 | H  | 0 | -1.821 | -9.110  | 3.001  |
| H      |     |    |   |        |         |        |
| HETATM | 348 | C  | 0 | -1.778 | -7.408  | 1.854  |
| C      |     |    |   |        |         |        |
| HETATM | 349 | H  | 0 | -2.719 | -7.330  | 1.748  |
| H      |     |    |   |        |         |        |
| HETATM | 350 | C  | 0 | -0.948 | -6.489  | 1.280  |
| C      |     |    |   |        |         |        |
| HETATM | 351 | H  | 0 | -1.318 | -5.774  | 0.777  |
| H      |     |    |   |        |         |        |
| HETATM | 352 | C  | 0 | 0.464  | -6.591  | 1.427  |
| C      |     |    |   |        |         |        |
| HETATM | 353 | C  | 0 | 1.342  | -5.652  | 0.856  |
| C      |     |    |   |        |         |        |
| HETATM | 354 | H  | 0 | 0.988  | -4.933  | 0.346  |
| H      |     |    |   |        |         |        |
| HETATM | 355 | C  | 0 | 8.043  | -4.564  | -2.235 |
| C      |     |    |   |        |         |        |
| HETATM | 356 | Fe | 0 | 3.446  | -14.503 | -0.329 |
| Fe     |     |    |   |        |         |        |
| HETATM | 357 | S  | 0 | 7.709  | -13.711 | 0.484  |
| S      |     |    |   |        |         |        |
| HETATM | 358 | S  | 0 | 2.316  | -11.811 | 3.397  |
| S      |     |    |   |        |         |        |

|        |     |   |   |        |         |        |
|--------|-----|---|---|--------|---------|--------|
| HETATM | 359 | N | 0 | 4.308  | -15.718 | 1.039  |
| N      |     |   |   |        |         |        |
| HETATM | 360 | N | 0 | 5.285  | -13.714 | -0.293 |
| N      |     |   |   |        |         |        |
| HETATM | 361 | N | 0 | 5.856  | -12.652 | -0.942 |
| N      |     |   |   |        |         |        |
| HETATM | 362 | N | 0 | 2.921  | -13.321 | 1.120  |
| N      |     |   |   |        |         |        |
| HETATM | 363 | C | 0 | 3.739  | -16.696 | 1.730  |
| C      |     |   |   |        |         |        |
| HETATM | 364 | H | 0 | 2.809  | -16.855 | 1.617  |
| H      |     |   |   |        |         |        |
| HETATM | 365 | C | 0 | 4.451  | -17.497 | 2.612  |
| C      |     |   |   |        |         |        |
| HETATM | 366 | H | 0 | 4.011  | -18.203 | 3.073  |
| H      |     |   |   |        |         |        |
| HETATM | 367 | C | 0 | 5.785  | -17.271 | 2.823  |
| C      |     |   |   |        |         |        |
| HETATM | 368 | H | 0 | 6.282  | -17.815 | 3.423  |
| H      |     |   |   |        |         |        |
| HETATM | 369 | C | 0 | 6.395  | -16.233 | 2.142  |
| C      |     |   |   |        |         |        |
| HETATM | 370 | H | 0 | 7.316  | -16.041 | 2.274  |
| H      |     |   |   |        |         |        |
| HETATM | 371 | C | 0 | 5.633  | -15.476 | 1.259  |
| C      |     |   |   |        |         |        |
| HETATM | 372 | C | 0 | 6.117  | -14.354 | 0.490  |
| C      |     |   |   |        |         |        |
| HETATM | 373 | C | 0 | 7.120  | -12.526 | -0.652 |
| C      |     |   |   |        |         |        |
| HETATM | 374 | C | 0 | 8.013  | -11.501 | -1.209 |
| C      |     |   |   |        |         |        |
| HETATM | 375 | C | 0 | 7.489  | -10.429 | -1.966 |
| C      |     |   |   |        |         |        |
| HETATM | 376 | H | 0 | 6.550  | -10.358 | -2.089 |
| H      |     |   |   |        |         |        |
| HETATM | 377 | C | 0 | 8.305  | -9.503  | -2.518 |
| C      |     |   |   |        |         |        |
| HETATM | 378 | H | 0 | 7.932  | -8.785  | -3.016 |
| H      |     |   |   |        |         |        |
| HETATM | 379 | C | 0 | 9.716  | -9.587  | -2.367 |
| C      |     |   |   |        |         |        |
| HETATM | 380 | C | 0 | 10.604 | -8.658  | -2.948 |
| C      |     |   |   |        |         |        |
| HETATM | 381 | H | 0 | 10.257 | -7.935  | -3.456 |
| H      |     |   |   |        |         |        |
| HETATM | 382 | C | 0 | 11.960 | -8.785  | -2.790 |
| C      |     |   |   |        |         |        |
| HETATM | 383 | H | 0 | 12.542 | -8.147  | -3.189 |
| H      |     |   |   |        |         |        |
| HETATM | 384 | C | 0 | 12.499 | -9.851  | -2.040 |
| C      |     |   |   |        |         |        |
| HETATM | 385 | H | 0 | 13.440 | -9.929  | -1.936 |
| H      |     |   |   |        |         |        |
| HETATM | 386 | C | 0 | 11.670 | -10.769 | -1.467 |
| C      |     |   |   |        |         |        |

|        |     |   |   |        |         |        |
|--------|-----|---|---|--------|---------|--------|
| HETATM | 387 | H | 0 | 12.039 | -11.484 | -0.964 |
| H      |     |   |   |        |         |        |
| HETATM | 388 | C | 0 | 10.258 | -10.667 | -1.613 |
| C      |     |   |   |        |         |        |
| HETATM | 389 | C | 0 | 9.379  | -11.605 | -1.044 |
| C      |     |   |   |        |         |        |
| HETATM | 390 | H | 0 | 9.734  | -12.324 | -0.534 |
| H      |     |   |   |        |         |        |
| HETATM | 391 | C | 0 | 2.679  | -12.694 | 2.049  |
| C      |     |   |   |        |         |        |
| HETATM | 392 | S | 0 | -0.817 | -15.295 | -1.143 |
| S      |     |   |   |        |         |        |
| HETATM | 393 | S | 0 | 4.575  | -17.195 | -4.056 |
| S      |     |   |   |        |         |        |
| HETATM | 394 | N | 0 | 2.584  | -13.289 | -1.698 |
| N      |     |   |   |        |         |        |
| HETATM | 395 | N | 0 | 1.607  | -15.292 | -0.366 |
| N      |     |   |   |        |         |        |
| HETATM | 396 | N | 0 | 1.036  | -16.355 | 0.283  |
| N      |     |   |   |        |         |        |
| HETATM | 397 | N | 0 | 3.971  | -15.685 | -1.779 |
| N      |     |   |   |        |         |        |
| HETATM | 398 | C | 0 | 3.153  | -12.311 | -2.389 |
| C      |     |   |   |        |         |        |
| HETATM | 399 | H | 0 | 4.082  | -12.151 | -2.276 |
| H      |     |   |   |        |         |        |
| HETATM | 400 | C | 0 | 2.440  | -11.509 | -3.271 |
| C      |     |   |   |        |         |        |
| HETATM | 401 | H | 0 | 2.880  | -10.803 | -3.732 |
| H      |     |   |   |        |         |        |
| HETATM | 402 | C | 0 | 1.106  | -11.736 | -3.482 |
| C      |     |   |   |        |         |        |
| HETATM | 403 | H | 0 | 0.611  | -11.191 | -4.082 |
| H      |     |   |   |        |         |        |
| HETATM | 404 | C | 0 | 0.497  | -12.772 | -2.801 |
| C      |     |   |   |        |         |        |
| HETATM | 405 | H | 0 | -0.424 | -12.966 | -2.933 |
| H      |     |   |   |        |         |        |
| HETATM | 406 | C | 0 | 1.258  | -13.530 | -1.918 |
| C      |     |   |   |        |         |        |
| HETATM | 407 | C | 0 | 0.775  | -14.652 | -1.149 |
| C      |     |   |   |        |         |        |
| HETATM | 408 | C | 0 | -0.227 | -16.479 | -0.007 |
| C      |     |   |   |        |         |        |
| HETATM | 409 | C | 0 | -1.122 | -17.506 | 0.550  |
| C      |     |   |   |        |         |        |
| HETATM | 410 | C | 0 | -0.597 | -18.577 | 1.307  |
| C      |     |   |   |        |         |        |
| HETATM | 411 | H | 0 | 0.342  | -18.648 | 1.430  |
| H      |     |   |   |        |         |        |
| HETATM | 412 | C | 0 | -1.414 | -19.503 | 1.860  |
| C      |     |   |   |        |         |        |
| HETATM | 413 | H | 0 | -1.039 | -20.222 | 2.357  |
| H      |     |   |   |        |         |        |
| HETATM | 414 | C | 0 | -2.825 | -19.419 | 1.708  |
| C      |     |   |   |        |         |        |



|        |     |    |   |        |         |        |
|--------|-----|----|---|--------|---------|--------|
| HETATM | 415 | C  | 0 | -3.712 | -20.348 | 2.289  |
| C      |     |    |   |        |         |        |
| HETATM | 416 | H  | 0 | -3.365 | -21.072 | 2.797  |
| H      |     |    |   |        |         |        |
| HETATM | 417 | C  | 0 | -5.069 | -20.222 | 2.131  |
| C      |     |    |   |        |         |        |
| HETATM | 418 | H  | 0 | -5.650 | -20.859 | 2.530  |
| H      |     |    |   |        |         |        |
| HETATM | 419 | C  | 0 | -5.608 | -19.156 | 1.381  |
| C      |     |    |   |        |         |        |
| HETATM | 420 | H  | 0 | -6.548 | -19.078 | 1.277  |
| H      |     |    |   |        |         |        |
| HETATM | 421 | C  | 0 | -4.777 | -18.238 | 0.808  |
| C      |     |    |   |        |         |        |
| HETATM | 422 | H  | 0 | -5.147 | -17.522 | 0.305  |
| H      |     |    |   |        |         |        |
| HETATM | 423 | C  | 0 | -3.366 | -18.339 | 0.954  |
| C      |     |    |   |        |         |        |
| HETATM | 424 | C  | 0 | -2.488 | -17.401 | 0.385  |
| C      |     |    |   |        |         |        |
| HETATM | 425 | H  | 0 | -2.842 | -16.682 | -0.125 |
| H      |     |    |   |        |         |        |
| HETATM | 426 | C  | 0 | 4.213  | -16.313 | -2.708 |
| C      |     |    |   |        |         |        |
| HETATM | 427 | Fe | 0 | 3.830  | 11.749  | 0.472  |
| Fe     |     |    |   |        |         |        |
| HETATM | 428 | S  | 0 | 8.092  | 12.541  | 1.286  |
| S      |     |    |   |        |         |        |
| HETATM | 429 | S  | 0 | 2.700  | 14.441  | 4.197  |
| S      |     |    |   |        |         |        |
| HETATM | 430 | N  | 0 | 4.692  | 10.534  | 1.840  |
| N      |     |    |   |        |         |        |
| HETATM | 431 | N  | 0 | 5.668  | 12.537  | 0.508  |
| N      |     |    |   |        |         |        |
| HETATM | 432 | N  | 0 | 6.239  | 13.599  | -0.140 |
| N      |     |    |   |        |         |        |
| HETATM | 433 | N  | 0 | 3.305  | 12.931  | 1.921  |
| N      |     |    |   |        |         |        |
| HETATM | 434 | C  | 0 | 4.123  | 9.555   | 2.531  |
| C      |     |    |   |        |         |        |
| HETATM | 435 | H  | 0 | 3.193  | 9.397   | 2.419  |
| H      |     |    |   |        |         |        |
| HETATM | 436 | C  | 0 | 4.835  | 8.755   | 3.414  |
| C      |     |    |   |        |         |        |
| HETATM | 437 | H  | 0 | 4.395  | 8.049   | 3.873  |
| H      |     |    |   |        |         |        |
| HETATM | 438 | C  | 0 | 6.169  | 8.981   | 3.625  |
| C      |     |    |   |        |         |        |
| HETATM | 439 | H  | 0 | 6.665  | 8.437   | 4.224  |
| H      |     |    |   |        |         |        |
| HETATM | 440 | C  | 0 | 6.778  | 10.018  | 2.943  |
| C      |     |    |   |        |         |        |
| HETATM | 441 | H  | 0 | 7.699  | 10.210  | 3.076  |
| H      |     |    |   |        |         |        |
| HETATM | 442 | C  | 0 | 6.017  | 10.776  | 2.060  |
| C      |     |    |   |        |         |        |

|        |     |   |   |        |        |        |
|--------|-----|---|---|--------|--------|--------|
| HETATM | 443 | C | 0 | 6.501  | 11.898 | 1.291  |
| C      |     |   |   |        |        |        |
| HETATM | 444 | C | 0 | 7.503  | 13.725 | 0.150  |
| C      |     |   |   |        |        |        |
| HETATM | 445 | C | 0 | 8.397  | 14.750 | -0.408 |
| C      |     |   |   |        |        |        |
| HETATM | 446 | C | 0 | 7.873  | 15.823 | -1.165 |
| C      |     |   |   |        |        |        |
| HETATM | 447 | H | 0 | 6.933  | 15.894 | -1.288 |
| H      |     |   |   |        |        |        |
| HETATM | 448 | C | 0 | 8.689  | 16.749 | -1.718 |
| C      |     |   |   |        |        |        |
| HETATM | 449 | H | 0 | 8.314  | 17.467 | -2.214 |
| H      |     |   |   |        |        |        |
| HETATM | 450 | C | 0 | 10.100 | 16.664 | -1.566 |
| C      |     |   |   |        |        |        |
| HETATM | 451 | C | 0 | 10.988 | 17.594 | -2.147 |
| C      |     |   |   |        |        |        |
| HETATM | 452 | H | 0 | 10.641 | 18.318 | -2.655 |
| H      |     |   |   |        |        |        |
| HETATM | 453 | C | 0 | 12.344 | 17.467 | -1.988 |
| C      |     |   |   |        |        |        |
| HETATM | 454 | H | 0 | 12.926 | 18.105 | -2.387 |
| H      |     |   |   |        |        |        |
| HETATM | 455 | C | 0 | 12.883 | 16.401 | -1.240 |
| C      |     |   |   |        |        |        |
| HETATM | 456 | H | 0 | 13.824 | 16.323 | -1.134 |
| H      |     |   |   |        |        |        |
| HETATM | 457 | C | 0 | 12.053 | 15.484 | -0.666 |
| C      |     |   |   |        |        |        |
| HETATM | 458 | H | 0 | 12.422 | 14.768 | -0.163 |
| H      |     |   |   |        |        |        |
| HETATM | 459 | C | 0 | 10.641 | 15.584 | -0.813 |
| C      |     |   |   |        |        |        |
| HETATM | 460 | C | 0 | 9.763  | 14.647 | -0.242 |
| C      |     |   |   |        |        |        |
| HETATM | 461 | H | 0 | 10.117 | 13.927 | 0.267  |
| H      |     |   |   |        |        |        |
| HETATM | 462 | C | 0 | 3.062  | 13.559 | 2.849  |
| C      |     |   |   |        |        |        |
| HETATM | 463 | S | 0 | -0.433 | 10.956 | -0.342 |
| S      |     |   |   |        |        |        |
| HETATM | 464 | S | 0 | 4.959  | 9.056  | -3.254 |
| S      |     |   |   |        |        |        |
| HETATM | 465 | N | 0 | 2.968  | 12.964 | -0.897 |
| N      |     |   |   |        |        |        |
| HETATM | 466 | N | 0 | 1.991  | 10.960 | 0.435  |
| N      |     |   |   |        |        |        |
| HETATM | 467 | N | 0 | 1.420  | 9.898  | 1.083  |
| N      |     |   |   |        |        |        |
| HETATM | 468 | N | 0 | 4.355  | 10.567 | -0.978 |
| N      |     |   |   |        |        |        |
| HETATM | 469 | C | 0 | 3.537  | 13.942 | -1.587 |
| C      |     |   |   |        |        |        |
| HETATM | 470 | H | 0 | 4.466  | 14.101 | -1.475 |
| H      |     |   |   |        |        |        |

|        |     |    |   |        |        |        |
|--------|-----|----|---|--------|--------|--------|
| HETATM | 471 | C  | 0 | 2.824  | 14.742 | -2.470 |
| C      |     |    |   |        |        |        |
| HETATM | 472 | H  | 0 | 3.264  | 15.448 | -2.930 |
| H      |     |    |   |        |        |        |
| HETATM | 473 | C  | 0 | 1.490  | 14.516 | -2.681 |
| C      |     |    |   |        |        |        |
| HETATM | 474 | H  | 0 | 0.993  | 15.060 | -3.281 |
| H      |     |    |   |        |        |        |
| HETATM | 475 | C  | 0 | 0.881  | 13.479 | -2.000 |
| C      |     |    |   |        |        |        |
| HETATM | 476 | H  | 0 | -0.041 | 13.287 | -2.133 |
| H      |     |    |   |        |        |        |
| HETATM | 477 | C  | 0 | 1.642  | 12.721 | -1.116 |
| C      |     |    |   |        |        |        |
| HETATM | 478 | C  | 0 | 1.158  | 11.599 | -0.348 |
| C      |     |    |   |        |        |        |
| HETATM | 479 | C  | 0 | 0.155  | 9.772  | 0.794  |
| C      |     |    |   |        |        |        |
| HETATM | 480 | C  | 0 | -0.738 | 8.747  | 1.352  |
| C      |     |    |   |        |        |        |
| HETATM | 481 | C  | 0 | -0.213 | 7.675  | 2.109  |
| C      |     |    |   |        |        |        |
| HETATM | 482 | H  | 0 | 0.725  | 7.603  | 2.231  |
| H      |     |    |   |        |        |        |
| HETATM | 483 | C  | 0 | -1.030 | 6.748  | 2.661  |
| C      |     |    |   |        |        |        |
| HETATM | 484 | H  | 0 | -0.656 | 6.030  | 3.157  |
| H      |     |    |   |        |        |        |
| HETATM | 485 | C  | 0 | -2.441 | 6.833  | 2.509  |
| C      |     |    |   |        |        |        |
| HETATM | 486 | C  | 0 | -3.329 | 5.903  | 3.091  |
| C      |     |    |   |        |        |        |
| HETATM | 487 | H  | 0 | -2.981 | 5.180  | 3.599  |
| H      |     |    |   |        |        |        |
| HETATM | 488 | C  | 0 | -4.685 | 6.030  | 2.932  |
| C      |     |    |   |        |        |        |
| HETATM | 489 | H  | 0 | -5.266 | 5.393  | 3.330  |
| H      |     |    |   |        |        |        |
| HETATM | 490 | C  | 0 | -5.224 | 7.096  | 2.183  |
| C      |     |    |   |        |        |        |
| HETATM | 491 | H  | 0 | -6.164 | 7.174  | 2.077  |
| H      |     |    |   |        |        |        |
| HETATM | 492 | C  | 0 | -4.394 | 8.014  | 1.609  |
| C      |     |    |   |        |        |        |
| HETATM | 493 | H  | 0 | -4.764 | 8.730  | 1.107  |
| H      |     |    |   |        |        |        |
| HETATM | 494 | C  | 0 | -2.982 | 7.913  | 1.756  |
| C      |     |    |   |        |        |        |
| HETATM | 495 | C  | 0 | -2.104 | 8.850  | 1.185  |
| C      |     |    |   |        |        |        |
| HETATM | 496 | H  | 0 | -2.459 | 9.570  | 0.676  |
| H      |     |    |   |        |        |        |
| HETATM | 497 | C  | 0 | 4.596  | 9.939  | -1.906 |
| C      |     |    |   |        |        |        |
| HETATM | 498 | Fe | 0 | 0.000  | 0.000  | 0.000  |
| Fe     |     |    |   |        |        |        |

|        |     |   |   |        |        |        |
|--------|-----|---|---|--------|--------|--------|
| HETATM | 499 | S | 0 | 4.334  | 0.821  | 0.853  |
| S      |     |   |   |        |        |        |
| HETATM | 500 | S | 0 | -1.105 | 2.822  | 3.779  |
| S      |     |   |   |        |        |        |
| HETATM | 501 | N | 0 | 0.869  | -1.278 | 1.305  |
| N      |     |   |   |        |        |        |
| HETATM | 502 | N | 0 | 1.844  | 0.825  | 0.049  |
| N      |     |   |   |        |        |        |
| HETATM | 503 | N | 0 | 2.426  | 1.914  | -0.610 |
| N      |     |   |   |        |        |        |
| HETATM | 504 | N | 0 | -0.520 | 1.137  | 1.498  |
| N      |     |   |   |        |        |        |
| HETATM | 505 | C | 0 | 0.290  | -2.340 | 1.920  |
| C      |     |   |   |        |        |        |
| HETATM | 506 | H | 0 | -0.752 | -2.523 | 1.664  |
| H      |     |   |   |        |        |        |
| HETATM | 507 | C | 0 | 0.997  | -3.148 | 2.843  |
| C      |     |   |   |        |        |        |
| HETATM | 508 | H | 0 | 0.492  | -3.991 | 3.311  |
| H      |     |   |   |        |        |        |
| HETATM | 509 | C | 0 | 2.344  | -2.845 | 3.143  |
| C      |     |   |   |        |        |        |
| HETATM | 510 | H | 0 | 2.910  | -3.449 | 3.852  |
| H      |     |   |   |        |        |        |
| HETATM | 511 | C | 0 | 2.953  | -1.738 | 2.508  |
| C      |     |   |   |        |        |        |
| HETATM | 512 | H | 0 | 3.978  | -1.451 | 2.738  |
| H      |     |   |   |        |        |        |
| HETATM | 513 | C | 0 | 2.179  | -0.992 | 1.594  |
| C      |     |   |   |        |        |        |
| HETATM | 514 | C | 0 | 2.680  | 0.168  | 0.847  |
| C      |     |   |   |        |        |        |
| HETATM | 515 | C | 0 | 3.712  | 2.062  | -0.316 |
| C      |     |   |   |        |        |        |
| HETATM | 516 | C | 0 | 4.605  | 3.096  | -0.873 |
| C      |     |   |   |        |        |        |
| HETATM | 517 | C | 0 | 4.061  | 4.199  | -1.632 |
| C      |     |   |   |        |        |        |
| HETATM | 518 | H | 0 | 2.982  | 4.268  | -1.766 |
| H      |     |   |   |        |        |        |
| HETATM | 519 | C | 0 | 4.915  | 5.149  | -2.186 |
| C      |     |   |   |        |        |        |
| HETATM | 520 | H | 0 | 4.519  | 5.989  | -2.760 |
| H      |     |   |   |        |        |        |
| HETATM | 521 | C | 0 | 6.348  | 5.036  | -2.032 |
| C      |     |   |   |        |        |        |
| HETATM | 522 | C | 0 | 7.258  | 5.982  | -2.626 |
| C      |     |   |   |        |        |        |
| HETATM | 523 | H | 0 | 6.847  | 6.810  | -3.205 |
| H      |     |   |   |        |        |        |
| HETATM | 524 | C | 0 | 8.637  | 5.847  | -2.444 |
| C      |     |   |   |        |        |        |
| HETATM | 525 | H | 0 | 9.330  | 6.550  | -2.908 |
| H      |     |   |   |        |        |        |
| HETATM | 526 | C | 0 | 9.171  | 4.762  | -1.662 |
| C      |     |   |   |        |        |        |

|        |     |   |   |        |        |        |
|--------|-----|---|---|--------|--------|--------|
| HETATM | 527 | H | 0 | 10.253 | 4.683  | -1.548 |
| H      |     |   |   |        |        |        |
| HETATM | 528 | C | 0 | 8.315  | 3.826  | -1.082 |
| C      |     |   |   |        |        |        |
| HETATM | 529 | H | 0 | 8.706  | 2.986  | -0.507 |
| H      |     |   |   |        |        |        |
| HETATM | 530 | C | 0 | 6.888  | 3.944  | -1.254 |
| C      |     |   |   |        |        |        |
| HETATM | 531 | C | 0 | 5.988  | 2.993  | -0.677 |
| C      |     |   |   |        |        |        |
| HETATM | 532 | H | 0 | 6.413  | 2.176  | -0.090 |
| H      |     |   |   |        |        |        |
| HETATM | 533 | C | 0 | -0.745 | 1.826  | 2.438  |
| C      |     |   |   |        |        |        |
| HETATM | 534 | S | 0 | -4.334 | -0.820 | -0.854 |
| S      |     |   |   |        |        |        |
| HETATM | 535 | S | 0 | 1.104  | -2.822 | -3.779 |
| S      |     |   |   |        |        |        |
| HETATM | 536 | N | 0 | -0.869 | 1.279  | -1.305 |
| N      |     |   |   |        |        |        |
| HETATM | 537 | N | 0 | -1.844 | -0.824 | -0.049 |
| N      |     |   |   |        |        |        |
| HETATM | 538 | N | 0 | -2.426 | -1.914 | 0.610  |
| N      |     |   |   |        |        |        |
| HETATM | 539 | N | 0 | 0.520  | -1.136 | -1.498 |
| N      |     |   |   |        |        |        |
| HETATM | 540 | C | 0 | -0.290 | 2.341  | -1.920 |
| C      |     |   |   |        |        |        |
| HETATM | 541 | H | 0 | 0.751  | 2.524  | -1.664 |
| H      |     |   |   |        |        |        |
| HETATM | 542 | C | 0 | -0.998 | 3.148  | -2.843 |
| C      |     |   |   |        |        |        |
| HETATM | 543 | H | 0 | -0.492 | 3.992  | -3.311 |
| H      |     |   |   |        |        |        |
| HETATM | 544 | C | 0 | -2.344 | 2.845  | -3.143 |
| C      |     |   |   |        |        |        |
| HETATM | 545 | H | 0 | -2.910 | 3.449  | -3.852 |
| H      |     |   |   |        |        |        |
| HETATM | 546 | C | 0 | -2.953 | 1.737  | -2.508 |
| C      |     |   |   |        |        |        |
| HETATM | 547 | H | 0 | -3.977 | 1.450  | -2.739 |
| H      |     |   |   |        |        |        |
| HETATM | 548 | C | 0 | -2.178 | 0.992  | -1.594 |
| C      |     |   |   |        |        |        |
| HETATM | 549 | C | 0 | -2.680 | -0.168 | -0.847 |
| C      |     |   |   |        |        |        |
| HETATM | 550 | C | 0 | -3.711 | -2.061 | 0.316  |
| C      |     |   |   |        |        |        |
| HETATM | 551 | C | 0 | -4.605 | -3.096 | 0.873  |
| C      |     |   |   |        |        |        |
| HETATM | 552 | C | 0 | -4.061 | -4.198 | 1.632  |
| C      |     |   |   |        |        |        |
| HETATM | 553 | H | 0 | -2.982 | -4.268 | 1.767  |
| H      |     |   |   |        |        |        |
| HETATM | 554 | C | 0 | -4.916 | -5.148 | 2.185  |
| C      |     |   |   |        |        |        |

|        |     |    |   |         |         |        |
|--------|-----|----|---|---------|---------|--------|
| HETATM | 555 | H  | 0 | -4.520  | -5.988  | 2.760  |
| H      |     |    |   |         |         |        |
| HETATM | 556 | C  | 0 | -6.348  | -5.035  | 2.031  |
| C      |     |    |   |         |         |        |
| HETATM | 557 | C  | 0 | -7.258  | -5.981  | 2.626  |
| C      |     |    |   |         |         |        |
| HETATM | 558 | H  | 0 | -6.849  | -6.809  | 3.204  |
| H      |     |    |   |         |         |        |
| HETATM | 559 | C  | 0 | -8.637  | -5.846  | 2.443  |
| C      |     |    |   |         |         |        |
| HETATM | 560 | H  | 0 | -9.331  | -6.549  | 2.906  |
| H      |     |    |   |         |         |        |
| HETATM | 561 | C  | 0 | -9.171  | -4.761  | 1.660  |
| C      |     |    |   |         |         |        |
| HETATM | 562 | H  | 0 | -10.253 | -4.682  | 1.546  |
| H      |     |    |   |         |         |        |
| HETATM | 563 | C  | 0 | -8.315  | -3.825  | 1.081  |
| C      |     |    |   |         |         |        |
| HETATM | 564 | H  | 0 | -8.706  | -2.984  | 0.505  |
| H      |     |    |   |         |         |        |
| HETATM | 565 | C  | 0 | -6.888  | -3.943  | 1.254  |
| C      |     |    |   |         |         |        |
| HETATM | 566 | C  | 0 | -5.988  | -2.992  | 0.676  |
| C      |     |    |   |         |         |        |
| HETATM | 567 | H  | 0 | -6.413  | -2.175  | 0.090  |
| H      |     |    |   |         |         |        |
| HETATM | 568 | C  | 0 | 0.745   | -1.826  | -2.438 |
| C      |     |    |   |         |         |        |
| HETATM | 569 | Fe | 0 | -3.830  | -11.749 | -0.472 |
| Fe     |     |    |   |         |         |        |
| HETATM | 570 | S  | 0 | 0.433   | -10.956 | 0.342  |
| S      |     |    |   |         |         |        |
| HETATM | 571 | S  | 0 | -4.959  | -9.056  | 3.254  |
| S      |     |    |   |         |         |        |
| HETATM | 572 | N  | 0 | -2.968  | -12.964 | 0.897  |
| N      |     |    |   |         |         |        |
| HETATM | 573 | N  | 0 | -1.991  | -10.960 | -0.435 |
| N      |     |    |   |         |         |        |
| HETATM | 574 | N  | 0 | -1.420  | -9.898  | -1.083 |
| N      |     |    |   |         |         |        |
| HETATM | 575 | N  | 0 | -4.355  | -10.567 | 0.978  |
| N      |     |    |   |         |         |        |
| HETATM | 576 | C  | 0 | -3.537  | -13.942 | 1.587  |
| C      |     |    |   |         |         |        |
| HETATM | 577 | H  | 0 | -4.466  | -14.101 | 1.475  |
| H      |     |    |   |         |         |        |
| HETATM | 578 | C  | 0 | -2.824  | -14.742 | 2.470  |
| C      |     |    |   |         |         |        |
| HETATM | 579 | H  | 0 | -3.264  | -15.448 | 2.930  |
| H      |     |    |   |         |         |        |
| HETATM | 580 | C  | 0 | -1.490  | -14.516 | 2.681  |
| C      |     |    |   |         |         |        |
| HETATM | 581 | H  | 0 | -0.993  | -15.060 | 3.281  |
| H      |     |    |   |         |         |        |
| HETATM | 582 | C  | 0 | -0.881  | -13.479 | 2.000  |
| C      |     |    |   |         |         |        |

|        |     |   |   |        |         |        |
|--------|-----|---|---|--------|---------|--------|
| HETATM | 583 | H | 0 | 0.041  | -13.287 | 2.133  |
| H      |     |   |   |        |         |        |
| HETATM | 584 | C | 0 | -1.642 | -12.721 | 1.116  |
| C      |     |   |   |        |         |        |
| HETATM | 585 | C | 0 | -1.158 | -11.599 | 0.348  |
| C      |     |   |   |        |         |        |
| HETATM | 586 | C | 0 | -0.155 | -9.772  | -0.794 |
| C      |     |   |   |        |         |        |
| HETATM | 587 | C | 0 | 0.738  | -8.747  | -1.352 |
| C      |     |   |   |        |         |        |
| HETATM | 588 | C | 0 | 0.213  | -7.675  | -2.108 |
| C      |     |   |   |        |         |        |
| HETATM | 589 | H | 0 | -0.725 | -7.603  | -2.231 |
| H      |     |   |   |        |         |        |
| HETATM | 590 | C | 0 | 1.030  | -6.748  | -2.661 |
| C      |     |   |   |        |         |        |
| HETATM | 591 | H | 0 | 0.656  | -6.030  | -3.157 |
| H      |     |   |   |        |         |        |
| HETATM | 592 | C | 0 | 2.441  | -6.833  | -2.509 |
| C      |     |   |   |        |         |        |
| HETATM | 593 | C | 0 | 3.329  | -5.903  | -3.091 |
| C      |     |   |   |        |         |        |
| HETATM | 594 | H | 0 | 2.981  | -5.180  | -3.599 |
| H      |     |   |   |        |         |        |
| HETATM | 595 | C | 0 | 4.685  | -6.030  | -2.932 |
| C      |     |   |   |        |         |        |
| HETATM | 596 | H | 0 | 5.266  | -5.393  | -3.330 |
| H      |     |   |   |        |         |        |
| HETATM | 597 | C | 0 | 5.224  | -7.096  | -2.183 |
| C      |     |   |   |        |         |        |
| HETATM | 598 | H | 0 | 6.164  | -7.174  | -2.077 |
| H      |     |   |   |        |         |        |
| HETATM | 599 | C | 0 | 4.394  | -8.014  | -1.609 |
| C      |     |   |   |        |         |        |
| HETATM | 600 | H | 0 | 4.764  | -8.730  | -1.107 |
| H      |     |   |   |        |         |        |
| HETATM | 601 | C | 0 | 2.982  | -7.913  | -1.756 |
| C      |     |   |   |        |         |        |
| HETATM | 602 | C | 0 | 2.104  | -8.850  | -1.185 |
| C      |     |   |   |        |         |        |
| HETATM | 603 | H | 0 | 2.459  | -9.570  | -0.676 |
| H      |     |   |   |        |         |        |
| HETATM | 604 | C | 0 | -4.596 | -9.939  | 1.906  |
| C      |     |   |   |        |         |        |
| HETATM | 605 | S | 0 | -8.092 | -12.541 | -1.286 |
| S      |     |   |   |        |         |        |
| HETATM | 606 | S | 0 | -2.700 | -14.441 | -4.197 |
| S      |     |   |   |        |         |        |
| HETATM | 607 | N | 0 | -4.692 | -10.534 | -1.840 |
| N      |     |   |   |        |         |        |
| HETATM | 608 | N | 0 | -5.668 | -12.537 | -0.508 |
| N      |     |   |   |        |         |        |
| HETATM | 609 | N | 0 | -6.239 | -13.599 | 0.140  |
| N      |     |   |   |        |         |        |
| HETATM | 610 | N | 0 | -3.305 | -12.931 | -1.921 |
| N      |     |   |   |        |         |        |

|        |     |   |   |         |         |        |
|--------|-----|---|---|---------|---------|--------|
| HETATM | 611 | C | 0 | -4.123  | -9.555  | -2.531 |
| C      |     |   |   |         |         |        |
| HETATM | 612 | H | 0 | -3.193  | -9.397  | -2.419 |
| H      |     |   |   |         |         |        |
| HETATM | 613 | C | 0 | -4.835  | -8.755  | -3.414 |
| C      |     |   |   |         |         |        |
| HETATM | 614 | H | 0 | -4.395  | -8.049  | -3.873 |
| H      |     |   |   |         |         |        |
| HETATM | 615 | C | 0 | -6.169  | -8.981  | -3.625 |
| C      |     |   |   |         |         |        |
| HETATM | 616 | H | 0 | -6.665  | -8.437  | -4.224 |
| H      |     |   |   |         |         |        |
| HETATM | 617 | C | 0 | -6.778  | -10.018 | -2.943 |
| C      |     |   |   |         |         |        |
| HETATM | 618 | H | 0 | -7.699  | -10.210 | -3.076 |
| H      |     |   |   |         |         |        |
| HETATM | 619 | C | 0 | -6.017  | -10.776 | -2.060 |
| C      |     |   |   |         |         |        |
| HETATM | 620 | C | 0 | -6.501  | -11.898 | -1.291 |
| C      |     |   |   |         |         |        |
| HETATM | 621 | C | 0 | -7.503  | -13.725 | -0.150 |
| C      |     |   |   |         |         |        |
| HETATM | 622 | C | 0 | -8.397  | -14.750 | 0.408  |
| C      |     |   |   |         |         |        |
| HETATM | 623 | C | 0 | -7.873  | -15.823 | 1.165  |
| C      |     |   |   |         |         |        |
| HETATM | 624 | H | 0 | -6.933  | -15.894 | 1.288  |
| H      |     |   |   |         |         |        |
| HETATM | 625 | C | 0 | -8.689  | -16.749 | 1.718  |
| C      |     |   |   |         |         |        |
| HETATM | 626 | H | 0 | -8.314  | -17.467 | 2.214  |
| H      |     |   |   |         |         |        |
| HETATM | 627 | C | 0 | -10.100 | -16.664 | 1.566  |
| C      |     |   |   |         |         |        |
| HETATM | 628 | C | 0 | -10.988 | -17.594 | 2.147  |
| C      |     |   |   |         |         |        |
| HETATM | 629 | H | 0 | -10.641 | -18.318 | 2.655  |
| H      |     |   |   |         |         |        |
| HETATM | 630 | C | 0 | -12.344 | -17.468 | 1.988  |
| C      |     |   |   |         |         |        |
| HETATM | 631 | H | 0 | -12.926 | -18.105 | 2.387  |
| H      |     |   |   |         |         |        |
| HETATM | 632 | C | 0 | -12.883 | -16.402 | 1.240  |
| C      |     |   |   |         |         |        |
| HETATM | 633 | H | 0 | -13.824 | -16.323 | 1.134  |
| H      |     |   |   |         |         |        |
| HETATM | 634 | C | 0 | -12.053 | -15.484 | 0.666  |
| C      |     |   |   |         |         |        |
| HETATM | 635 | H | 0 | -12.422 | -14.768 | 0.163  |
| H      |     |   |   |         |         |        |
| HETATM | 636 | C | 0 | -10.641 | -15.584 | 0.813  |
| C      |     |   |   |         |         |        |
| HETATM | 637 | C | 0 | -9.763  | -14.647 | 0.242  |
| C      |     |   |   |         |         |        |
| HETATM | 638 | H | 0 | -10.117 | -13.927 | -0.267 |
| H      |     |   |   |         |         |        |



|        |     |    |   |        |         |        |
|--------|-----|----|---|--------|---------|--------|
| HETATM | 639 | C  | 0 | -3.062 | -13.559 | -2.849 |
| C      |     |    |   |        |         |        |
| HETATM | 640 | Fe | 0 | -3.446 | 14.503  | 0.330  |
| Fe     |     |    |   |        |         |        |
| HETATM | 641 | S  | 0 | 0.817  | 15.295  | 1.143  |
| S      |     |    |   |        |         |        |
| HETATM | 642 | S  | 0 | -4.575 | 17.195  | 4.056  |
| S      |     |    |   |        |         |        |
| HETATM | 643 | N  | 0 | -2.584 | 13.289  | 1.698  |
| N      |     |    |   |        |         |        |
| HETATM | 644 | N  | 0 | -1.607 | 15.292  | 0.366  |
| N      |     |    |   |        |         |        |
| HETATM | 645 | N  | 0 | -1.036 | 16.354  | -0.283 |
| N      |     |    |   |        |         |        |
| HETATM | 646 | N  | 0 | -3.971 | 15.685  | 1.779  |
| N      |     |    |   |        |         |        |
| HETATM | 647 | C  | 0 | -3.153 | 12.310  | 2.389  |
| C      |     |    |   |        |         |        |
| HETATM | 648 | H  | 0 | -4.082 | 12.151  | 2.276  |
| H      |     |    |   |        |         |        |
| HETATM | 649 | C  | 0 | -2.440 | 11.509  | 3.271  |
| C      |     |    |   |        |         |        |
| HETATM | 650 | H  | 0 | -2.880 | 10.803  | 3.732  |
| H      |     |    |   |        |         |        |
| HETATM | 651 | C  | 0 | -1.106 | 11.736  | 3.482  |
| C      |     |    |   |        |         |        |
| HETATM | 652 | H  | 0 | -0.611 | 11.191  | 4.082  |
| H      |     |    |   |        |         |        |
| HETATM | 653 | C  | 0 | -0.497 | 12.772  | 2.801  |
| C      |     |    |   |        |         |        |
| HETATM | 654 | H  | 0 | 0.424  | 12.966  | 2.933  |
| H      |     |    |   |        |         |        |
| HETATM | 655 | C  | 0 | -1.258 | 13.530  | 1.918  |
| C      |     |    |   |        |         |        |
| HETATM | 656 | C  | 0 | -0.775 | 14.652  | 1.149  |
| C      |     |    |   |        |         |        |
| HETATM | 657 | C  | 0 | 0.227  | 16.479  | 0.007  |
| C      |     |    |   |        |         |        |
| HETATM | 658 | C  | 0 | 1.122  | 17.505  | -0.550 |
| C      |     |    |   |        |         |        |
| HETATM | 659 | C  | 0 | 0.597  | 18.577  | -1.307 |
| C      |     |    |   |        |         |        |
| HETATM | 660 | H  | 0 | -0.342 | 18.648  | -1.430 |
| H      |     |    |   |        |         |        |
| HETATM | 661 | C  | 0 | 1.414  | 19.503  | -1.859 |
| C      |     |    |   |        |         |        |
| HETATM | 662 | H  | 0 | 1.039  | 20.222  | -2.357 |
| H      |     |    |   |        |         |        |
| HETATM | 663 | C  | 0 | 2.825  | 19.419  | -1.708 |
| C      |     |    |   |        |         |        |
| HETATM | 664 | C  | 0 | 3.712  | 20.348  | -2.289 |
| C      |     |    |   |        |         |        |
| HETATM | 665 | H  | 0 | 3.365  | 21.072  | -2.797 |
| H      |     |    |   |        |         |        |
| HETATM | 666 | C  | 0 | 5.069  | 20.222  | -2.131 |
| C      |     |    |   |        |         |        |

|        |     |   |   |        |        |        |
|--------|-----|---|---|--------|--------|--------|
| HETATM | 667 | H | 0 | 5.650  | 20.859 | -2.530 |
| H      |     |   |   |        |        |        |
| HETATM | 668 | C | 0 | 5.608  | 19.156 | -1.381 |
| C      |     |   |   |        |        |        |
| HETATM | 669 | H | 0 | 6.548  | 19.078 | -1.277 |
| H      |     |   |   |        |        |        |
| HETATM | 670 | C | 0 | 4.777  | 18.238 | -0.808 |
| C      |     |   |   |        |        |        |
| HETATM | 671 | H | 0 | 5.147  | 17.522 | -0.305 |
| H      |     |   |   |        |        |        |
| HETATM | 672 | C | 0 | 3.366  | 18.339 | -0.954 |
| C      |     |   |   |        |        |        |
| HETATM | 673 | C | 0 | 2.488  | 17.401 | -0.385 |
| C      |     |   |   |        |        |        |
| HETATM | 674 | H | 0 | 2.842  | 16.682 | 0.125  |
| H      |     |   |   |        |        |        |
| HETATM | 675 | C | 0 | -4.213 | 16.313 | 2.708  |
| C      |     |   |   |        |        |        |
| HETATM | 676 | S | 0 | -7.709 | 13.711 | -0.484 |
| S      |     |   |   |        |        |        |
| HETATM | 677 | S | 0 | -2.316 | 11.811 | -3.397 |
| S      |     |   |   |        |        |        |
| HETATM | 678 | N | 0 | -4.308 | 15.718 | -1.039 |
| N      |     |   |   |        |        |        |
| HETATM | 679 | N | 0 | -5.285 | 13.714 | 0.293  |
| N      |     |   |   |        |        |        |
| HETATM | 680 | N | 0 | -5.856 | 12.652 | 0.942  |
| N      |     |   |   |        |        |        |
| HETATM | 681 | N | 0 | -2.921 | 13.321 | -1.120 |
| N      |     |   |   |        |        |        |
| HETATM | 682 | C | 0 | -3.739 | 16.696 | -1.730 |
| C      |     |   |   |        |        |        |
| HETATM | 683 | H | 0 | -2.809 | 16.855 | -1.617 |
| H      |     |   |   |        |        |        |
| HETATM | 684 | C | 0 | -4.451 | 17.497 | -2.612 |
| C      |     |   |   |        |        |        |
| HETATM | 685 | H | 0 | -4.011 | 18.203 | -3.073 |
| H      |     |   |   |        |        |        |
| HETATM | 686 | C | 0 | -5.785 | 17.271 | -2.823 |
| C      |     |   |   |        |        |        |
| HETATM | 687 | H | 0 | -6.282 | 17.815 | -3.423 |
| H      |     |   |   |        |        |        |
| HETATM | 688 | C | 0 | -6.395 | 16.233 | -2.142 |
| C      |     |   |   |        |        |        |
| HETATM | 689 | H | 0 | -7.316 | 16.041 | -2.274 |
| H      |     |   |   |        |        |        |
| HETATM | 690 | C | 0 | -5.633 | 15.476 | -1.259 |
| C      |     |   |   |        |        |        |
| HETATM | 691 | C | 0 | -6.117 | 14.354 | -0.490 |
| C      |     |   |   |        |        |        |
| HETATM | 692 | C | 0 | -7.120 | 12.526 | 0.652  |
| C      |     |   |   |        |        |        |
| HETATM | 693 | C | 0 | -8.013 | 11.501 | 1.209  |
| C      |     |   |   |        |        |        |
| HETATM | 694 | C | 0 | -7.488 | 10.429 | 1.966  |
| C      |     |   |   |        |        |        |

|        |     |    |   |         |        |        |
|--------|-----|----|---|---------|--------|--------|
| HETATM | 695 | H  | 0 | -6.550  | 10.358 | 2.089  |
| H      |     |    |   |         |        |        |
| HETATM | 696 | C  | 0 | -8.305  | 9.503  | 2.519  |
| C      |     |    |   |         |        |        |
| HETATM | 697 | H  | 0 | -7.932  | 8.785  | 3.016  |
| H      |     |    |   |         |        |        |
| HETATM | 698 | C  | 0 | -9.716  | 9.587  | 2.367  |
| C      |     |    |   |         |        |        |
| HETATM | 699 | C  | 0 | -10.604 | 8.658  | 2.948  |
| C      |     |    |   |         |        |        |
| HETATM | 700 | H  | 0 | -10.257 | 7.935  | 3.456  |
| H      |     |    |   |         |        |        |
| HETATM | 701 | C  | 0 | -11.960 | 8.785  | 2.790  |
| C      |     |    |   |         |        |        |
| HETATM | 702 | H  | 0 | -12.542 | 8.147  | 3.189  |
| H      |     |    |   |         |        |        |
| HETATM | 703 | C  | 0 | -12.499 | 9.851  | 2.040  |
| C      |     |    |   |         |        |        |
| HETATM | 704 | H  | 0 | -13.440 | 9.929  | 1.936  |
| H      |     |    |   |         |        |        |
| HETATM | 705 | C  | 0 | -11.670 | 10.769 | 1.467  |
| C      |     |    |   |         |        |        |
| HETATM | 706 | H  | 0 | -12.039 | 11.484 | 0.964  |
| H      |     |    |   |         |        |        |
| HETATM | 707 | C  | 0 | -10.258 | 10.667 | 1.613  |
| C      |     |    |   |         |        |        |
| HETATM | 708 | C  | 0 | -9.379  | 11.605 | 1.044  |
| C      |     |    |   |         |        |        |
| HETATM | 709 | H  | 0 | -9.734  | 12.324 | 0.534  |
| H      |     |    |   |         |        |        |
| HETATM | 710 | C  | 0 | -2.679  | 12.693 | -2.049 |
| C      |     |    |   |         |        |        |
| HETATM | 711 | Fe | 0 | -7.275  | 2.754  | -0.142 |
| Fe     |     |    |   |         |        |        |
| HETATM | 712 | S  | 0 | -3.013  | 3.546  | 0.672  |
| S      |     |    |   |         |        |        |
| HETATM | 713 | S  | 0 | -8.404  | 5.448  | 3.584  |
| S      |     |    |   |         |        |        |
| HETATM | 714 | N  | 0 | -6.413  | 1.540  | 1.226  |
| N      |     |    |   |         |        |        |
| HETATM | 715 | N  | 0 | -5.436  | 3.543  | -0.106 |
| N      |     |    |   |         |        |        |
| HETATM | 716 | N  | 0 | -4.866  | 4.606  | -0.754 |
| N      |     |    |   |         |        |        |
| HETATM | 717 | N  | 0 | -7.801  | 3.937  | 1.307  |
| N      |     |    |   |         |        |        |
| HETATM | 718 | C  | 0 | -6.982  | 0.562  | 1.917  |
| C      |     |    |   |         |        |        |
| HETATM | 719 | H  | 0 | -7.913  | 0.402  | 1.805  |
| H      |     |    |   |         |        |        |
| HETATM | 720 | C  | 0 | -6.271  | -0.240 | 2.800  |
| C      |     |    |   |         |        |        |
| HETATM | 721 | H  | 0 | -6.709  | -0.946 | 3.259  |
| H      |     |    |   |         |        |        |
| HETATM | 722 | C  | 0 | -4.937  | -0.013 | 3.010  |
| C      |     |    |   |         |        |        |

|        |     |   |   |         |        |        |
|--------|-----|---|---|---------|--------|--------|
| HETATM | 723 | H | 0 | -4.440  | -0.557 | 3.611  |
| H      |     |   |   |         |        |        |
| HETATM | 724 | C | 0 | -4.326  | 1.025  | 2.329  |
| C      |     |   |   |         |        |        |
| HETATM | 725 | H | 0 | -3.406  | 1.217  | 2.462  |
| H      |     |   |   |         |        |        |
| HETATM | 726 | C | 0 | -5.087  | 1.782  | 1.447  |
| C      |     |   |   |         |        |        |
| HETATM | 727 | C | 0 | -4.604  | 2.904  | 0.677  |
| C      |     |   |   |         |        |        |
| HETATM | 728 | C | 0 | -3.602  | 4.731  | -0.464 |
| C      |     |   |   |         |        |        |
| HETATM | 729 | C | 0 | -2.707  | 5.757  | -1.022 |
| C      |     |   |   |         |        |        |
| HETATM | 730 | C | 0 | -3.232  | 6.829  | -1.779 |
| C      |     |   |   |         |        |        |
| HETATM | 731 | H | 0 | -4.171  | 6.900  | -1.902 |
| H      |     |   |   |         |        |        |
| HETATM | 732 | C | 0 | -2.416  | 7.755  | -2.331 |
| C      |     |   |   |         |        |        |
| HETATM | 733 | H | 0 | -2.790  | 8.473  | -2.828 |
| H      |     |   |   |         |        |        |
| HETATM | 734 | C | 0 | -1.004  | 7.670  | -2.179 |
| C      |     |   |   |         |        |        |
| HETATM | 735 | C | 0 | -0.117  | 8.599  | -2.761 |
| C      |     |   |   |         |        |        |
| HETATM | 736 | H | 0 | -0.464  | 9.323  | -3.269 |
| H      |     |   |   |         |        |        |
| HETATM | 737 | C | 0 | 1.239   | 8.473  | -2.602 |
| C      |     |   |   |         |        |        |
| HETATM | 738 | H | 0 | 1.821   | 9.110  | -3.001 |
| H      |     |   |   |         |        |        |
| HETATM | 739 | C | 0 | 1.778   | 7.408  | -1.854 |
| C      |     |   |   |         |        |        |
| HETATM | 740 | H | 0 | 2.719   | 7.330  | -1.748 |
| H      |     |   |   |         |        |        |
| HETATM | 741 | C | 0 | 0.948   | 6.489  | -1.280 |
| C      |     |   |   |         |        |        |
| HETATM | 742 | H | 0 | 1.318   | 5.774  | -0.777 |
| H      |     |   |   |         |        |        |
| HETATM | 743 | C | 0 | -0.464  | 6.591  | -1.427 |
| C      |     |   |   |         |        |        |
| HETATM | 744 | C | 0 | -1.342  | 5.652  | -0.856 |
| C      |     |   |   |         |        |        |
| HETATM | 745 | H | 0 | -0.988  | 4.933  | -0.346 |
| H      |     |   |   |         |        |        |
| HETATM | 746 | C | 0 | -8.043  | 4.564  | 2.235  |
| C      |     |   |   |         |        |        |
| HETATM | 747 | S | 0 | -11.538 | 1.962  | -0.956 |
| S      |     |   |   |         |        |        |
| HETATM | 748 | S | 0 | -6.146  | 0.062  | -3.868 |
| S      |     |   |   |         |        |        |
| HETATM | 749 | N | 0 | -8.137  | 3.969  | -1.511 |
| N      |     |   |   |         |        |        |
| HETATM | 750 | N | 0 | -9.114  | 1.966  | -0.179 |
| N      |     |   |   |         |        |        |

|        |     |   |   |         |        |        |
|--------|-----|---|---|---------|--------|--------|
| HETATM | 751 | N | 0 | -9.685  | 0.903  | 0.469  |
| N      |     |   |   |         |        |        |
| HETATM | 752 | N | 0 | -6.750  | 1.572  | -1.592 |
| N      |     |   |   |         |        |        |
| HETATM | 753 | C | 0 | -7.568  | 4.947  | -2.201 |
| C      |     |   |   |         |        |        |
| HETATM | 754 | H | 0 | -6.638  | 5.106  | -2.089 |
| H      |     |   |   |         |        |        |
| HETATM | 755 | C | 0 | -8.281  | 5.748  | -3.084 |
| C      |     |   |   |         |        |        |
| HETATM | 756 | H | 0 | -7.841  | 6.454  | -3.544 |
| H      |     |   |   |         |        |        |
| HETATM | 757 | C | 0 | -9.615  | 5.522  | -3.295 |
| C      |     |   |   |         |        |        |
| HETATM | 758 | H | 0 | -10.111 | 6.066  | -3.895 |
| H      |     |   |   |         |        |        |
| HETATM | 759 | C | 0 | -10.224 | 4.485  | -2.614 |
| C      |     |   |   |         |        |        |
| HETATM | 760 | H | 0 | -11.145 | 4.292  | -2.747 |
| H      |     |   |   |         |        |        |
| HETATM | 761 | C | 0 | -9.463  | 3.727  | -1.730 |
| C      |     |   |   |         |        |        |
| HETATM | 762 | C | 0 | -9.946  | 2.605  | -0.962 |
| C      |     |   |   |         |        |        |
| HETATM | 763 | C | 0 | -10.949 | 0.778  | 0.180  |
| C      |     |   |   |         |        |        |
| HETATM | 764 | C | 0 | -11.843 | -0.247 | 0.738  |
| C      |     |   |   |         |        |        |
| HETATM | 765 | C | 0 | -11.318 | -1.320 | 1.494  |
| C      |     |   |   |         |        |        |
| HETATM | 766 | H | 0 | -10.379 | -1.391 | 1.617  |
| H      |     |   |   |         |        |        |
| HETATM | 767 | C | 0 | -12.135 | -2.246 | 2.047  |
| C      |     |   |   |         |        |        |
| HETATM | 768 | H | 0 | -11.761 | -2.964 | 2.543  |
| H      |     |   |   |         |        |        |
| HETATM | 769 | C | 0 | -13.545 | -2.161 | 1.895  |
| C      |     |   |   |         |        |        |
| HETATM | 770 | C | 0 | -14.434 | -3.091 | 2.477  |
| C      |     |   |   |         |        |        |
| HETATM | 771 | H | 0 | -14.087 | -3.814 | 2.984  |
| H      |     |   |   |         |        |        |
| HETATM | 772 | C | 0 | -15.790 | -2.964 | 2.318  |
| C      |     |   |   |         |        |        |
| HETATM | 773 | H | 0 | -16.372 | -3.601 | 2.716  |
| H      |     |   |   |         |        |        |
| HETATM | 774 | C | 0 | -16.328 | -1.898 | 1.569  |
| C      |     |   |   |         |        |        |
| HETATM | 775 | H | 0 | -17.269 | -1.820 | 1.463  |
| H      |     |   |   |         |        |        |
| HETATM | 776 | C | 0 | -15.499 | -0.980 | 0.995  |
| C      |     |   |   |         |        |        |
| HETATM | 777 | H | 0 | -15.868 | -0.264 | 0.493  |
| H      |     |   |   |         |        |        |
| HETATM | 778 | C | 0 | -14.087 | -1.082 | 1.142  |
| C      |     |   |   |         |        |        |

|        |     |    |   |         |         |        |
|--------|-----|----|---|---------|---------|--------|
| HETATM | 779 | C  | 0 | -13.209 | -0.144  | 0.571  |
| C      |     |    |   |         |         |        |
| HETATM | 780 | H  | 0 | -13.563 | 0.576   | 0.062  |
| H      |     |    |   |         |         |        |
| HETATM | 781 | C  | 0 | -6.508  | 0.945   | -2.520 |
| C      |     |    |   |         |         |        |
| HETATM | 782 | Fe | 0 | -11.105 | -8.994  | -0.614 |
| Fe     |     |    |   |         |         |        |
| HETATM | 783 | S  | 0 | -6.842  | -8.202  | 0.200  |
| S      |     |    |   |         |         |        |
| HETATM | 784 | S  | 0 | -12.234 | -6.301  | 3.112  |
| S      |     |    |   |         |         |        |
| HETATM | 785 | N  | 0 | -10.243 | -10.209 | 0.755  |
| N      |     |    |   |         |         |        |
| HETATM | 786 | N  | 0 | -9.267  | -8.206  | -0.577 |
| N      |     |    |   |         |         |        |
| HETATM | 787 | N  | 0 | -8.695  | -7.143  | -1.225 |
| N      |     |    |   |         |         |        |
| HETATM | 788 | N  | 0 | -11.630 | -7.812  | 0.835  |
| N      |     |    |   |         |         |        |
| HETATM | 789 | C  | 0 | -10.811 | -11.187 | 1.445  |
| C      |     |    |   |         |         |        |
| HETATM | 790 | H  | 0 | -11.742 | -11.347 | 1.332  |
| H      |     |    |   |         |         |        |
| HETATM | 791 | C  | 0 | -10.100 | -11.988 | 2.328  |
| C      |     |    |   |         |         |        |
| HETATM | 792 | H  | 0 | -10.539 | -12.693 | 2.788  |
| H      |     |    |   |         |         |        |
| HETATM | 793 | C  | 0 | -8.766  | -11.761 | 2.539  |
| C      |     |    |   |         |         |        |
| HETATM | 794 | H  | 0 | -8.269  | -12.306 | 3.139  |
| H      |     |    |   |         |         |        |
| HETATM | 795 | C  | 0 | -8.156  | -10.724 | 1.858  |
| C      |     |    |   |         |         |        |
| HETATM | 796 | H  | 0 | -7.235  | -10.532 | 1.991  |
| H      |     |    |   |         |         |        |
| HETATM | 797 | C  | 0 | -8.917  | -9.967  | 0.974  |
| C      |     |    |   |         |         |        |
| HETATM | 798 | C  | 0 | -8.434  | -8.845  | 0.205  |
| C      |     |    |   |         |         |        |
| HETATM | 799 | C  | 0 | -7.431  | -7.017  | -0.937 |
| C      |     |    |   |         |         |        |
| HETATM | 800 | C  | 0 | -6.537  | -5.992  | -1.494 |
| C      |     |    |   |         |         |        |
| HETATM | 801 | C  | 0 | -7.063  | -4.920  | -2.251 |
| C      |     |    |   |         |         |        |
| HETATM | 802 | H  | 0 | -8.001  | -4.848  | -2.374 |
| H      |     |    |   |         |         |        |
| HETATM | 803 | C  | 0 | -6.245  | -3.993  | -2.803 |
| C      |     |    |   |         |         |        |
| HETATM | 804 | H  | 0 | -6.620  | -3.276  | -3.300 |
| H      |     |    |   |         |         |        |
| HETATM | 805 | C  | 0 | -4.835  | -4.079  | -2.651 |
| C      |     |    |   |         |         |        |
| HETATM | 806 | C  | 0 | -3.946  | -3.149  | -3.233 |
| C      |     |    |   |         |         |        |

|        |     |   |   |         |         |        |
|--------|-----|---|---|---------|---------|--------|
| HETATM | 807 | H | 0 | -4.294  | -2.426  | -3.741 |
| H      |     |   |   |         |         |        |
| HETATM | 808 | C | 0 | -2.590  | -3.276  | -3.075 |
| C      |     |   |   |         |         |        |
| HETATM | 809 | H | 0 | -2.008  | -2.639  | -3.472 |
| H      |     |   |   |         |         |        |
| HETATM | 810 | C | 0 | -2.052  | -4.341  | -2.325 |
| C      |     |   |   |         |         |        |
| HETATM | 811 | H | 0 | -1.110  | -4.419  | -2.219 |
| H      |     |   |   |         |         |        |
| HETATM | 812 | C | 0 | -2.881  | -5.259  | -1.751 |
| C      |     |   |   |         |         |        |
| HETATM | 813 | H | 0 | -2.512  | -5.975  | -1.249 |
| H      |     |   |   |         |         |        |
| HETATM | 814 | C | 0 | -4.293  | -5.158  | -1.898 |
| C      |     |   |   |         |         |        |
| HETATM | 815 | C | 0 | -5.171  | -6.096  | -1.328 |
| C      |     |   |   |         |         |        |
| HETATM | 816 | H | 0 | -4.817  | -6.816  | -0.818 |
| H      |     |   |   |         |         |        |
| HETATM | 817 | C | 0 | -11.872 | -7.185  | 1.764  |
| C      |     |   |   |         |         |        |
| HETATM | 818 | S | 0 | -15.368 | -9.786  | -1.428 |
| S      |     |   |   |         |         |        |
| HETATM | 819 | S | 0 | -9.975  | -11.687 | -4.340 |
| S      |     |   |   |         |         |        |
| HETATM | 820 | N | 0 | -11.967 | -7.780  | -1.982 |
| N      |     |   |   |         |         |        |
| HETATM | 821 | N | 0 | -12.943 | -9.782  | -0.650 |
| N      |     |   |   |         |         |        |
| HETATM | 822 | N | 0 | -13.514 | -10.845 | -0.002 |
| N      |     |   |   |         |         |        |
| HETATM | 823 | N | 0 | -10.580 | -10.177 | -2.063 |
| N      |     |   |   |         |         |        |
| HETATM | 824 | C | 0 | -11.398 | -6.801  | -2.674 |
| C      |     |   |   |         |         |        |
| HETATM | 825 | H | 0 | -10.468 | -6.642  | -2.561 |
| H      |     |   |   |         |         |        |
| HETATM | 826 | C | 0 | -12.110 | -6.000  | -3.556 |
| C      |     |   |   |         |         |        |
| HETATM | 827 | H | 0 | -11.670 | -5.295  | -4.015 |
| H      |     |   |   |         |         |        |
| HETATM | 828 | C | 0 | -13.444 | -6.227  | -3.767 |
| C      |     |   |   |         |         |        |
| HETATM | 829 | H | 0 | -13.940 | -5.682  | -4.367 |
| H      |     |   |   |         |         |        |
| HETATM | 830 | C | 0 | -14.054 | -7.264  | -3.085 |
| C      |     |   |   |         |         |        |
| HETATM | 831 | H | 0 | -14.974 | -7.456  | -3.218 |
| H      |     |   |   |         |         |        |
| HETATM | 832 | C | 0 | -13.293 | -8.021  | -2.203 |
| C      |     |   |   |         |         |        |
| HETATM | 833 | C | 0 | -13.776 | -9.144  | -1.433 |
| C      |     |   |   |         |         |        |
| HETATM | 834 | C | 0 | -14.778 | -10.971 | -0.292 |
| C      |     |   |   |         |         |        |

|        |     |    |   |         |         |        |
|--------|-----|----|---|---------|---------|--------|
| HETATM | 835 | C  | 0 | -15.673 | -11.996 | 0.266  |
| C      |     |    |   |         |         |        |
| HETATM | 836 | C  | 0 | -15.147 | -13.069 | 1.023  |
| C      |     |    |   |         |         |        |
| HETATM | 837 | H  | 0 | -14.209 | -13.140 | 1.146  |
| H      |     |    |   |         |         |        |
| HETATM | 838 | C  | 0 | -15.964 | -13.995 | 1.576  |
| C      |     |    |   |         |         |        |
| HETATM | 839 | H  | 0 | -15.590 | -14.712 | 2.072  |
| H      |     |    |   |         |         |        |
| HETATM | 840 | C  | 0 | -17.375 | -13.910 | 1.423  |
| C      |     |    |   |         |         |        |
| HETATM | 841 | C  | 0 | -18.263 | -14.839 | 2.004  |
| C      |     |    |   |         |         |        |
| HETATM | 842 | H  | 0 | -17.916 | -15.563 | 2.513  |
| H      |     |    |   |         |         |        |
| HETATM | 843 | C  | 0 | -19.620 | -14.713 | 1.846  |
| C      |     |    |   |         |         |        |
| HETATM | 844 | H  | 0 | -20.202 | -15.350 | 2.245  |
| H      |     |    |   |         |         |        |
| HETATM | 845 | C  | 0 | -20.158 | -13.647 | 1.098  |
| C      |     |    |   |         |         |        |
| HETATM | 846 | H  | 0 | -21.099 | -13.569 | 0.992  |
| H      |     |    |   |         |         |        |
| HETATM | 847 | C  | 0 | -19.328 | -12.729 | 0.524  |
| C      |     |    |   |         |         |        |
| HETATM | 848 | H  | 0 | -19.698 | -12.013 | 0.021  |
| H      |     |    |   |         |         |        |
| HETATM | 849 | C  | 0 | -17.916 | -12.830 | 0.671  |
| C      |     |    |   |         |         |        |
| HETATM | 850 | C  | 0 | -17.039 | -11.893 | 0.100  |
| C      |     |    |   |         |         |        |
| HETATM | 851 | H  | 0 | -17.393 | -11.173 | -0.410 |
| H      |     |    |   |         |         |        |
| HETATM | 852 | C  | 0 | -10.338 | -10.804 | -2.992 |
| C      |     |    |   |         |         |        |
| HETATM | 853 | Fe | 0 | -10.721 | 17.258  | 0.187  |
| Fe     |     |    |   |         |         |        |
| HETATM | 854 | S  | 0 | -6.458  | 18.049  | 1.001  |
| S      |     |    |   |         |         |        |
| HETATM | 855 | S  | 0 | -11.851 | 19.950  | 3.914  |
| S      |     |    |   |         |         |        |
| HETATM | 856 | N  | 0 | -9.859  | 16.043  | 1.555  |
| N      |     |    |   |         |         |        |
| HETATM | 857 | N  | 0 | -8.882  | 18.046  | 0.223  |
| N      |     |    |   |         |         |        |
| HETATM | 858 | N  | 0 | -8.311  | 19.109  | -0.425 |
| N      |     |    |   |         |         |        |
| HETATM | 859 | N  | 0 | -11.246 | 18.440  | 1.637  |
| N      |     |    |   |         |         |        |
| HETATM | 860 | C  | 0 | -10.428 | 15.065  | 2.247  |
| C      |     |    |   |         |         |        |
| HETATM | 861 | H  | 0 | -11.358 | 14.906  | 2.134  |
| H      |     |    |   |         |         |        |
| HETATM | 862 | C  | 0 | -9.716  | 14.263  | 3.129  |
| C      |     |    |   |         |         |        |



|        |     |   |   |         |        |        |
|--------|-----|---|---|---------|--------|--------|
| HETATM | 863 | H | 0 | -10.156 | 13.558 | 3.589  |
| H      |     |   |   |         |        |        |
| HETATM | 864 | C | 0 | -8.382  | 14.490 | 3.340  |
| C      |     |   |   |         |        |        |
| HETATM | 865 | H | 0 | -7.885  | 13.946 | 3.940  |
| H      |     |   |   |         |        |        |
| HETATM | 866 | C | 0 | -7.773  | 15.527 | 2.659  |
| C      |     |   |   |         |        |        |
| HETATM | 867 | H | 0 | -6.851  | 15.720 | 2.791  |
| H      |     |   |   |         |        |        |
| HETATM | 868 | C | 0 | -8.534  | 16.284 | 1.776  |
| C      |     |   |   |         |        |        |
| HETATM | 869 | C | 0 | -8.050  | 17.406 | 1.007  |
| C      |     |   |   |         |        |        |
| HETATM | 870 | C | 0 | -7.047  | 19.234 | -0.135 |
| C      |     |   |   |         |        |        |
| HETATM | 871 | C | 0 | -6.153  | 20.260 | -0.692 |
| C      |     |   |   |         |        |        |
| HETATM | 872 | C | 0 | -6.679  | 21.332 | -1.449 |
| C      |     |   |   |         |        |        |
| HETATM | 873 | H | 0 | -7.617  | 21.403 | -1.572 |
| H      |     |   |   |         |        |        |
| HETATM | 874 | C | 0 | -5.862  | 22.258 | -2.002 |
| C      |     |   |   |         |        |        |
| HETATM | 875 | H | 0 | -6.235  | 22.976 | -2.499 |
| H      |     |   |   |         |        |        |
| HETATM | 876 | C | 0 | -4.451  | 22.174 | -1.850 |
| C      |     |   |   |         |        |        |
| HETATM | 877 | C | 0 | -3.562  | 23.102 | -2.431 |
| C      |     |   |   |         |        |        |
| HETATM | 878 | H | 0 | -3.910  | 23.826 | -2.939 |
| H      |     |   |   |         |        |        |
| HETATM | 879 | C | 0 | -2.206  | 22.976 | -2.273 |
| C      |     |   |   |         |        |        |
| HETATM | 880 | H | 0 | -1.624  | 23.613 | -2.672 |
| H      |     |   |   |         |        |        |
| HETATM | 881 | C | 0 | -1.668  | 21.910 | -1.524 |
| C      |     |   |   |         |        |        |
| HETATM | 882 | H | 0 | -0.728  | 21.832 | -1.419 |
| H      |     |   |   |         |        |        |
| HETATM | 883 | C | 0 | -2.497  | 20.992 | -0.951 |
| C      |     |   |   |         |        |        |
| HETATM | 884 | H | 0 | -2.128  | 20.276 | -0.447 |
| H      |     |   |   |         |        |        |
| HETATM | 885 | C | 0 | -3.909  | 21.094 | -1.097 |
| C      |     |   |   |         |        |        |
| HETATM | 886 | C | 0 | -4.787  | 20.156 | -0.527 |
| C      |     |   |   |         |        |        |
| HETATM | 887 | H | 0 | -4.433  | 19.437 | -0.017 |
| H      |     |   |   |         |        |        |
| HETATM | 888 | C | 0 | -11.488 | 19.067 | 2.565  |
| C      |     |   |   |         |        |        |
| HETATM | 889 | S | 0 | -14.984 | 16.466 | -0.627 |
| S      |     |   |   |         |        |        |
| HETATM | 890 | S | 0 | -9.592  | 14.565 | -3.539 |
| S      |     |   |   |         |        |        |

|        |     |   |   |         |        |        |
|--------|-----|---|---|---------|--------|--------|
| HETATM | 891 | N | 0 | -11.583 | 18.472 | -1.181 |
| N      |     |   |   |         |        |        |
| HETATM | 892 | N | 0 | -12.560 | 16.469 | 0.151  |
| N      |     |   |   |         |        |        |
| HETATM | 893 | N | 0 | -13.131 | 15.406 | 0.799  |
| N      |     |   |   |         |        |        |
| HETATM | 894 | N | 0 | -10.195 | 16.075 | -1.263 |
| N      |     |   |   |         |        |        |
| HETATM | 895 | C | 0 | -11.015 | 19.450 | -1.872 |
| C      |     |   |   |         |        |        |
| HETATM | 896 | H | 0 | -10.084 | 19.610 | -1.759 |
| H      |     |   |   |         |        |        |
| HETATM | 897 | C | 0 | -11.726 | 20.252 | -2.755 |
| C      |     |   |   |         |        |        |
| HETATM | 898 | H | 0 | -11.287 | 20.958 | -3.215 |
| H      |     |   |   |         |        |        |
| HETATM | 899 | C | 0 | -13.060 | 20.025 | -2.965 |
| C      |     |   |   |         |        |        |
| HETATM | 900 | H | 0 | -13.556 | 20.570 | -3.565 |
| H      |     |   |   |         |        |        |
| HETATM | 901 | C | 0 | -13.670 | 18.988 | -2.285 |
| C      |     |   |   |         |        |        |
| HETATM | 902 | H | 0 | -14.591 | 18.795 | -2.417 |
| H      |     |   |   |         |        |        |
| HETATM | 903 | C | 0 | -12.909 | 18.231 | -1.401 |
| C      |     |   |   |         |        |        |
| HETATM | 904 | C | 0 | -13.392 | 17.109 | -0.632 |
| C      |     |   |   |         |        |        |
| HETATM | 905 | C | 0 | -14.395 | 15.281 | 0.510  |
| C      |     |   |   |         |        |        |
| HETATM | 906 | C | 0 | -15.289 | 14.255 | 1.067  |
| C      |     |   |   |         |        |        |
| HETATM | 907 | C | 0 | -14.764 | 13.183 | 1.824  |
| C      |     |   |   |         |        |        |
| HETATM | 908 | H | 0 | -13.825 | 13.112 | 1.947  |
| H      |     |   |   |         |        |        |
| HETATM | 909 | C | 0 | -15.580 | 12.257 | 2.376  |
| C      |     |   |   |         |        |        |
| HETATM | 910 | H | 0 | -15.206 | 11.539 | 2.873  |
| H      |     |   |   |         |        |        |
| HETATM | 911 | C | 0 | -16.992 | 12.342 | 2.225  |
| C      |     |   |   |         |        |        |
| HETATM | 912 | C | 0 | -17.879 | 11.413 | 2.806  |
| C      |     |   |   |         |        |        |
| HETATM | 913 | H | 0 | -17.532 | 10.689 | 3.314  |
| H      |     |   |   |         |        |        |
| HETATM | 914 | C | 0 | -19.236 | 11.539 | 2.648  |
| C      |     |   |   |         |        |        |
| HETATM | 915 | H | 0 | -19.817 | 10.902 | 3.046  |
| H      |     |   |   |         |        |        |
| HETATM | 916 | C | 0 | -19.774 | 12.605 | 1.898  |
| C      |     |   |   |         |        |        |
| HETATM | 917 | H | 0 | -20.715 | 12.683 | 1.793  |
| H      |     |   |   |         |        |        |
| HETATM | 918 | C | 0 | -18.944 | 13.523 | 1.325  |
| C      |     |   |   |         |        |        |

|        |     |    |   |         |        |        |
|--------|-----|----|---|---------|--------|--------|
| HETATM | 919 | H  | 0 | -19.314 | 14.238 | 0.822  |
| H      |     |    |   |         |        |        |
| HETATM | 920 | C  | 0 | -17.532 | 13.421 | 1.471  |
| C      |     |    |   |         |        |        |
| HETATM | 921 | C  | 0 | -16.655 | 14.359 | 0.902  |
| C      |     |    |   |         |        |        |
| HETATM | 922 | H  | 0 | -17.009 | 15.078 | 0.392  |
| H      |     |    |   |         |        |        |
| HETATM | 923 | C  | 0 | -9.954  | 15.448 | -2.191 |
| C      |     |    |   |         |        |        |
| HETATM | 924 | Fe | 0 | -14.551 | 5.509  | -0.284 |
| Fe     |     |    |   |         |        |        |
| HETATM | 925 | S  | 0 | -10.288 | 6.301  | 0.530  |
| S      |     |    |   |         |        |        |
| HETATM | 926 | S  | 0 | -15.680 | 8.202  | 3.441  |
| S      |     |    |   |         |        |        |
| HETATM | 927 | N  | 0 | -13.689 | 4.294  | 1.084  |
| N      |     |    |   |         |        |        |
| HETATM | 928 | N  | 0 | -12.712 | 6.297  | -0.248 |
| N      |     |    |   |         |        |        |
| HETATM | 929 | N  | 0 | -12.141 | 7.360  | -0.896 |
| N      |     |    |   |         |        |        |
| HETATM | 930 | N  | 0 | -15.076 | 6.691  | 1.165  |
| N      |     |    |   |         |        |        |
| HETATM | 931 | C  | 0 | -14.258 | 3.316  | 1.775  |
| C      |     |    |   |         |        |        |
| HETATM | 932 | H  | 0 | -15.187 | 3.157  | 1.663  |
| H      |     |    |   |         |        |        |
| HETATM | 933 | C  | 0 | -13.545 | 2.514  | 2.658  |
| C      |     |    |   |         |        |        |
| HETATM | 934 | H  | 0 | -13.985 | 1.809  | 3.117  |
| H      |     |    |   |         |        |        |
| HETATM | 935 | C  | 0 | -12.211 | 2.741  | 2.868  |
| C      |     |    |   |         |        |        |
| HETATM | 936 | H  | 0 | -11.714 | 2.198  | 3.468  |
| H      |     |    |   |         |        |        |
| HETATM | 937 | C  | 0 | -11.602 | 3.779  | 2.187  |
| C      |     |    |   |         |        |        |
| HETATM | 938 | H  | 0 | -10.681 | 3.971  | 2.320  |
| H      |     |    |   |         |        |        |
| HETATM | 939 | C  | 0 | -12.363 | 4.536  | 1.304  |
| C      |     |    |   |         |        |        |
| HETATM | 940 | C  | 0 | -11.879 | 5.659  | 0.535  |
| C      |     |    |   |         |        |        |
| HETATM | 941 | C  | 0 | -10.876 | 7.486  | -0.606 |
| C      |     |    |   |         |        |        |
| HETATM | 942 | C  | 0 | -9.983  | 8.511  | -1.164 |
| C      |     |    |   |         |        |        |
| HETATM | 943 | C  | 0 | -10.508 | 9.583  | -1.922 |
| C      |     |    |   |         |        |        |
| HETATM | 944 | H  | 0 | -11.446 | 9.655  | -2.044 |
| H      |     |    |   |         |        |        |
| HETATM | 945 | C  | 0 | -9.691  | 10.510 | -2.473 |
| C      |     |    |   |         |        |        |
| HETATM | 946 | H  | 0 | -10.065 | 11.227 | -2.970 |
| H      |     |    |   |         |        |        |

|        |     |   |   |         |        |        |
|--------|-----|---|---|---------|--------|--------|
| HETATM | 947 | C | 0 | -8.280  | 10.425 | -2.322 |
| C      |     |   |   |         |        |        |
| HETATM | 948 | C | 0 | -7.393  | 11.354 | -2.903 |
| C      |     |   |   |         |        |        |
| HETATM | 949 | H | 0 | -7.740  | 12.077 | -3.412 |
| H      |     |   |   |         |        |        |
| HETATM | 950 | C | 0 | -6.036  | 11.227 | -2.745 |
| C      |     |   |   |         |        |        |
| HETATM | 951 | H | 0 | -5.455  | 11.865 | -3.143 |
| H      |     |   |   |         |        |        |
| HETATM | 952 | C | 0 | -5.497  | 10.162 | -1.996 |
| C      |     |   |   |         |        |        |
| HETATM | 953 | H | 0 | -4.557  | 10.084 | -1.890 |
| H      |     |   |   |         |        |        |
| HETATM | 954 | C | 0 | -6.327  | 9.243  | -1.422 |
| C      |     |   |   |         |        |        |
| HETATM | 955 | H | 0 | -5.957  | 8.528  | -0.920 |
| H      |     |   |   |         |        |        |
| HETATM | 956 | C | 0 | -7.739  | 9.345  | -1.569 |
| C      |     |   |   |         |        |        |
| HETATM | 957 | C | 0 | -8.617  | 8.407  | -0.998 |
| C      |     |   |   |         |        |        |
| HETATM | 958 | H | 0 | -8.262  | 7.688  | -0.489 |
| H      |     |   |   |         |        |        |
| HETATM | 959 | C | 0 | -15.317 | 7.319  | 2.093  |
| C      |     |   |   |         |        |        |
| HETATM | 960 | S | 0 | -18.813 | 4.717  | -1.098 |
| S      |     |   |   |         |        |        |
| HETATM | 961 | S | 0 | -13.421 | 2.816  | -4.010 |
| S      |     |   |   |         |        |        |
| HETATM | 962 | N | 0 | -15.413 | 6.723  | -1.653 |
| N      |     |   |   |         |        |        |
| HETATM | 963 | N | 0 | -16.390 | 4.720  | -0.321 |
| N      |     |   |   |         |        |        |
| HETATM | 964 | N | 0 | -16.961 | 3.658  | 0.327  |
| N      |     |   |   |         |        |        |
| HETATM | 965 | N | 0 | -14.026 | 4.326  | -1.734 |
| N      |     |   |   |         |        |        |
| HETATM | 966 | C | 0 | -14.844 | 7.701  | -2.344 |
| C      |     |   |   |         |        |        |
| HETATM | 967 | H | 0 | -13.914 | 7.861  | -2.231 |
| H      |     |   |   |         |        |        |
| HETATM | 968 | C | 0 | -15.556 | 8.503  | -3.226 |
| C      |     |   |   |         |        |        |
| HETATM | 969 | H | 0 | -15.116 | 9.209  | -3.686 |
| H      |     |   |   |         |        |        |
| HETATM | 970 | C | 0 | -16.890 | 8.276  | -3.438 |
| C      |     |   |   |         |        |        |
| HETATM | 971 | H | 0 | -17.386 | 8.821  | -4.037 |
| H      |     |   |   |         |        |        |
| HETATM | 972 | C | 0 | -17.499 | 7.239  | -2.756 |
| C      |     |   |   |         |        |        |
| HETATM | 973 | H | 0 | -18.420 | 7.046  | -2.889 |
| H      |     |   |   |         |        |        |
| HETATM | 974 | C | 0 | -16.738 | 6.482  | -1.872 |
| C      |     |   |   |         |        |        |

|        |      |    |   |         |        |        |
|--------|------|----|---|---------|--------|--------|
| HETATM | 975  | C  | 0 | -17.222 | 5.360  | -1.104 |
| C      |      |    |   |         |        |        |
| HETATM | 976  | C  | 0 | -18.224 | 3.533  | 0.038  |
| C      |      |    |   |         |        |        |
| HETATM | 977  | C  | 0 | -19.118 | 2.507  | 0.596  |
| C      |      |    |   |         |        |        |
| HETATM | 978  | C  | 0 | -18.594 | 1.435  | 1.352  |
| C      |      |    |   |         |        |        |
| HETATM | 979  | H  | 0 | -17.654 | 1.364  | 1.475  |
| H      |      |    |   |         |        |        |
| HETATM | 980  | C  | 0 | -19.410 | 0.509  | 1.905  |
| C      |      |    |   |         |        |        |
| HETATM | 981  | H  | 0 | -19.036 | -0.210 | 2.401  |
| H      |      |    |   |         |        |        |
| HETATM | 982  | C  | 0 | -20.821 | 0.594  | 1.753  |
| C      |      |    |   |         |        |        |
| HETATM | 983  | C  | 0 | -21.709 | -0.336 | 2.335  |
| C      |      |    |   |         |        |        |
| HETATM | 984  | H  | 0 | -21.362 | -1.060 | 2.842  |
| H      |      |    |   |         |        |        |
| HETATM | 985  | C  | 0 | -23.065 | -0.210 | 2.176  |
| C      |      |    |   |         |        |        |
| HETATM | 986  | H  | 0 | -23.647 | -0.847 | 2.574  |
| H      |      |    |   |         |        |        |
| HETATM | 987  | C  | 0 | -23.604 | 0.856  | 1.427  |
| C      |      |    |   |         |        |        |
| HETATM | 988  | H  | 0 | -24.545 | 0.934  | 1.321  |
| H      |      |    |   |         |        |        |
| HETATM | 989  | C  | 0 | -22.774 | 1.774  | 0.853  |
| C      |      |    |   |         |        |        |
| HETATM | 990  | H  | 0 | -23.143 | 2.490  | 0.350  |
| H      |      |    |   |         |        |        |
| HETATM | 991  | C  | 0 | -21.363 | 1.673  | 1.000  |
| C      |      |    |   |         |        |        |
| HETATM | 992  | C  | 0 | -20.484 | 2.611  | 0.429  |
| C      |      |    |   |         |        |        |
| HETATM | 993  | H  | 0 | -20.838 | 3.331  | -0.080 |
| H      |      |    |   |         |        |        |
| HETATM | 994  | C  | 0 | -13.783 | 3.699  | -2.662 |
| C      |      |    |   |         |        |        |
| HETATM | 995  | Fe | 0 | -18.380 | -6.240 | -0.757 |
| Fe     |      |    |   |         |        |        |
| HETATM | 996  | S  | 0 | -14.117 | -5.447 | 0.057  |
| S      |      |    |   |         |        |        |
| HETATM | 997  | S  | 0 | -19.509 | -3.547 | 2.970  |
| S      |      |    |   |         |        |        |
| HETATM | 998  | N  | 0 | -17.518 | -7.455 | 0.613  |
| N      |      |    |   |         |        |        |
| HETATM | 999  | N  | 0 | -16.541 | -5.451 | -0.719 |
| N      |      |    |   |         |        |        |
| HETATM | 1000 | N  | 0 | -15.970 | -4.389 | -1.368 |
| N      |      |    |   |         |        |        |
| HETATM | 1001 | N  | 0 | -18.905 | -5.058 | 0.693  |
| N      |      |    |   |         |        |        |
| HETATM | 1002 | C  | 0 | -18.087 | -8.433 | 1.303  |
| C      |      |    |   |         |        |        |

|             |   |   |         |        |        |
|-------------|---|---|---------|--------|--------|
| HETATM 1003 | H | 0 | -19.017 | -8.592 | 1.190  |
| H           |   |   |         |        |        |
| HETATM 1004 | C | 0 | -17.374 | -9.233 | 2.185  |
| C           |   |   |         |        |        |
| HETATM 1005 | H | 0 | -17.814 | -9.939 | 2.646  |
| H           |   |   |         |        |        |
| HETATM 1006 | C | 0 | -16.040 | -9.007 | 2.397  |
| C           |   |   |         |        |        |
| HETATM 1007 | H | 0 | -15.545 | -9.551 | 2.997  |
| H           |   |   |         |        |        |
| HETATM 1008 | C | 0 | -15.431 | -7.970 | 1.715  |
| C           |   |   |         |        |        |
| HETATM 1009 | H | 0 | -14.511 | -7.778 | 1.848  |
| H           |   |   |         |        |        |
| HETATM 1010 | C | 0 | -16.192 | -7.212 | 0.832  |
| C           |   |   |         |        |        |
| HETATM 1011 | C | 0 | -15.709 | -6.090 | 0.063  |
| C           |   |   |         |        |        |
| HETATM 1012 | C | 0 | -14.707 | -4.263 | -1.079 |
| C           |   |   |         |        |        |
| HETATM 1013 | C | 0 | -13.813 | -3.238 | -1.636 |
| C           |   |   |         |        |        |
| HETATM 1014 | C | 0 | -14.337 | -2.166 | -2.393 |
| C           |   |   |         |        |        |
| HETATM 1015 | H | 0 | -15.277 | -2.094 | -2.516 |
| H           |   |   |         |        |        |
| HETATM 1016 | C | 0 | -13.520 | -1.239 | -2.945 |
| C           |   |   |         |        |        |
| HETATM 1017 | H | 0 | -13.895 | -0.521 | -3.442 |
| H           |   |   |         |        |        |
| HETATM 1018 | C | 0 | -12.109 | -1.324 | -2.793 |
| C           |   |   |         |        |        |
| HETATM 1019 | C | 0 | -11.222 | -0.394 | -3.375 |
| C           |   |   |         |        |        |
| HETATM 1020 | H | 0 | -11.569 | 0.329  | -3.883 |
| H           |   |   |         |        |        |
| HETATM 1021 | C | 0 | -9.866  | -0.521 | -3.217 |
| C           |   |   |         |        |        |
| HETATM 1022 | H | 0 | -9.284  | 0.116  | -3.615 |
| H           |   |   |         |        |        |
| HETATM 1023 | C | 0 | -9.327  | -1.587 | -2.467 |
| C           |   |   |         |        |        |
| HETATM 1024 | H | 0 | -8.386  | -1.665 | -2.361 |
| H           |   |   |         |        |        |
| HETATM 1025 | C | 0 | -10.157 | -2.505 | -1.893 |
| C           |   |   |         |        |        |
| HETATM 1026 | H | 0 | -9.788  | -3.220 | -1.391 |
| H           |   |   |         |        |        |
| HETATM 1027 | C | 0 | -11.568 | -2.404 | -2.040 |
| C           |   |   |         |        |        |
| HETATM 1028 | C | 0 | -12.446 | -3.341 | -1.470 |
| C           |   |   |         |        |        |
| HETATM 1029 | H | 0 | -12.093 | -4.061 | -0.960 |
| H           |   |   |         |        |        |
| HETATM 1030 | C | 0 | -19.148 | -4.430 | 1.622  |
| C           |   |   |         |        |        |

|        |      |   |   |         |         |        |
|--------|------|---|---|---------|---------|--------|
| HETATM | 1031 | S | 0 | -22.643 | -7.032  | -1.570 |
| S      |      |   |   |         |         |        |
| HETATM | 1032 | S | 0 | -17.251 | -8.933  | -4.482 |
| S      |      |   |   |         |         |        |
| HETATM | 1033 | N | 0 | -19.242 | -5.025  | -2.125 |
| N      |      |   |   |         |         |        |
| HETATM | 1034 | N | 0 | -20.219 | -7.028  | -0.793 |
| N      |      |   |   |         |         |        |
| HETATM | 1035 | N | 0 | -20.790 | -8.090  | -0.144 |
| N      |      |   |   |         |         |        |
| HETATM | 1036 | N | 0 | -17.855 | -7.423  | -2.205 |
| N      |      |   |   |         |         |        |
| HETATM | 1037 | C | 0 | -18.673 | -4.046  | -2.816 |
| C      |      |   |   |         |         |        |
| HETATM | 1038 | H | 0 | -17.743 | -3.888  | -2.703 |
| H      |      |   |   |         |         |        |
| HETATM | 1039 | C | 0 | -19.386 | -3.246  | -3.698 |
| C      |      |   |   |         |         |        |
| HETATM | 1040 | H | 0 | -18.946 | -2.540  | -4.158 |
| H      |      |   |   |         |         |        |
| HETATM | 1041 | C | 0 | -20.720 | -3.472  | -3.909 |
| C      |      |   |   |         |         |        |
| HETATM | 1042 | H | 0 | -21.216 | -2.928  | -4.509 |
| H      |      |   |   |         |         |        |
| HETATM | 1043 | C | 0 | -21.329 | -4.509  | -3.227 |
| C      |      |   |   |         |         |        |
| HETATM | 1044 | H | 0 | -22.250 | -4.701  | -3.360 |
| H      |      |   |   |         |         |        |
| HETATM | 1045 | C | 0 | -20.568 | -5.267  | -2.345 |
| C      |      |   |   |         |         |        |
| HETATM | 1046 | C | 0 | -21.051 | -6.389  | -1.575 |
| C      |      |   |   |         |         |        |
| HETATM | 1047 | C | 0 | -22.054 | -8.216  | -0.434 |
| C      |      |   |   |         |         |        |
| HETATM | 1048 | C | 0 | -22.947 | -9.241  | 0.123  |
| C      |      |   |   |         |         |        |
| HETATM | 1049 | C | 0 | -22.423 | -10.314 | 0.881  |
| C      |      |   |   |         |         |        |
| HETATM | 1050 | H | 0 | -21.484 | -10.385 | 1.004  |
| H      |      |   |   |         |         |        |
| HETATM | 1051 | C | 0 | -23.240 | -11.240 | 1.433  |
| C      |      |   |   |         |         |        |
| HETATM | 1052 | H | 0 | -22.866 | -11.958 | 1.930  |
| H      |      |   |   |         |         |        |
| HETATM | 1053 | C | 0 | -24.651 | -11.155 | 1.281  |
| C      |      |   |   |         |         |        |
| HETATM | 1054 | C | 0 | -25.538 | -12.085 | 1.862  |
| C      |      |   |   |         |         |        |
| HETATM | 1055 | H | 0 | -25.191 | -12.809 | 2.371  |
| H      |      |   |   |         |         |        |
| HETATM | 1056 | C | 0 | -26.895 | -11.959 | 1.704  |
| C      |      |   |   |         |         |        |
| HETATM | 1057 | H | 0 | -27.476 | -12.596 | 2.103  |
| H      |      |   |   |         |         |        |
| HETATM | 1058 | C | 0 | -27.433 | -10.893 | 0.955  |
| C      |      |   |   |         |         |        |

|        |      |   |   |         |         |        |
|--------|------|---|---|---------|---------|--------|
| HETATM | 1059 | H | 0 | -28.374 | -10.815 | 0.850  |
| H      |      |   |   |         |         |        |
| HETATM | 1060 | C | 0 | -26.604 | -9.974  | 0.381  |
| C      |      |   |   |         |         |        |
| HETATM | 1061 | H | 0 | -26.973 | -9.259  | -0.121 |
| H      |      |   |   |         |         |        |
| HETATM | 1062 | C | 0 | -25.192 | -10.075 | 0.528  |
| C      |      |   |   |         |         |        |
| HETATM | 1063 | C | 0 | -24.314 | -9.138  | -0.042 |
| C      |      |   |   |         |         |        |
| HETATM | 1064 | H | 0 | -24.668 | -8.418  | -0.552 |
| H      |      |   |   |         |         |        |
| HETATM | 1065 | C | 0 | -17.614 | -8.050  | -3.134 |
| C      |      |   |   |         |         |        |

END

|         |    |    |    |    |
|---------|----|----|----|----|
| CONNECT | 1  | 7  | 42 |    |
| CONNECT | 2  | 17 | 18 |    |
| CONNECT | 3  | 36 |    |    |
| CONNECT | 4  | 8  | 16 |    |
| CONNECT | 5  | 6  | 17 |    |
| CONNECT | 6  | 5  | 18 |    |
| CONNECT | 7  | 1  | 36 |    |
| CONNECT | 8  | 4  | 9  | 10 |
| CONNECT | 9  | 8  |    |    |
| CONNECT | 10 | 8  | 11 | 12 |
| CONNECT | 11 | 10 |    |    |
| CONNECT | 12 | 10 | 13 | 14 |
| CONNECT | 13 | 12 |    |    |
| CONNECT | 14 | 12 | 15 | 16 |
| CONNECT | 15 | 14 |    |    |
| CONNECT | 16 | 4  | 14 | 17 |
| CONNECT | 17 | 5  | 16 | 2  |
| CONNECT | 18 | 6  | 2  | 19 |
| CONNECT | 19 | 18 | 20 | 34 |
| CONNECT | 20 | 19 | 21 | 22 |
| CONNECT | 21 | 20 |    |    |
| CONNECT | 22 | 20 | 23 | 24 |
| CONNECT | 23 | 22 |    |    |
| CONNECT | 24 | 22 | 25 | 33 |
| CONNECT | 25 | 24 | 26 | 27 |
| CONNECT | 26 | 25 |    |    |
| CONNECT | 27 | 25 | 28 | 29 |
| CONNECT | 28 | 27 |    |    |
| CONNECT | 29 | 27 | 30 | 31 |
| CONNECT | 30 | 29 |    |    |
| CONNECT | 31 | 29 | 32 | 33 |
| CONNECT | 32 | 31 |    |    |
| CONNECT | 33 | 24 | 31 | 34 |
| CONNECT | 34 | 19 | 33 | 35 |
| CONNECT | 35 | 34 |    |    |
| CONNECT | 36 | 3  | 7  |    |
| CONNECT | 37 | 52 | 53 |    |
| CONNECT | 38 | 71 |    |    |
| CONNECT | 39 | 43 | 51 |    |
| CONNECT | 40 | 41 | 52 |    |
| CONNECT | 41 | 40 | 53 |    |
| CONNECT | 42 | 1  | 71 |    |



|        |    |     |     |     |
|--------|----|-----|-----|-----|
| CONECT | 43 | 39  | 44  | 45  |
| CONECT | 44 | 43  |     |     |
| CONECT | 45 | 43  | 46  | 47  |
| CONECT | 46 | 45  |     |     |
| CONECT | 47 | 45  | 48  | 49  |
| CONECT | 48 | 47  |     |     |
| CONECT | 49 | 47  | 50  | 51  |
| CONECT | 50 | 49  |     |     |
| CONECT | 51 | 49  | 39  | 52  |
| CONECT | 52 | 37  | 40  | 51  |
| CONECT | 53 | 37  | 41  | 54  |
| CONECT | 54 | 53  | 55  | 69  |
| CONECT | 55 | 54  | 56  | 57  |
| CONECT | 56 | 55  |     |     |
| CONECT | 57 | 55  | 58  | 59  |
| CONECT | 58 | 57  |     |     |
| CONECT | 59 | 57  | 60  | 68  |
| CONECT | 60 | 59  | 61  | 62  |
| CONECT | 61 | 60  |     |     |
| CONECT | 62 | 60  | 63  | 64  |
| CONECT | 63 | 62  |     |     |
| CONECT | 64 | 62  | 65  | 66  |
| CONECT | 65 | 64  |     |     |
| CONECT | 66 | 64  | 67  | 68  |
| CONECT | 67 | 66  |     |     |
| CONECT | 68 | 66  | 59  | 69  |
| CONECT | 69 | 68  | 54  | 70  |
| CONECT | 70 | 69  |     |     |
| CONECT | 71 | 38  | 42  |     |
| CONECT | 72 | 78  | 113 |     |
| CONECT | 73 | 88  | 89  |     |
| CONECT | 74 | 107 |     |     |
| CONECT | 75 | 79  | 87  |     |
| CONECT | 76 | 77  | 88  |     |
| CONECT | 77 | 76  | 89  |     |
| CONECT | 78 | 72  | 107 |     |
| CONECT | 79 | 75  | 80  | 81  |
| CONECT | 80 | 79  |     |     |
| CONECT | 81 | 79  | 82  | 83  |
| CONECT | 82 | 81  |     |     |
| CONECT | 83 | 81  | 84  | 85  |
| CONECT | 84 | 83  |     |     |
| CONECT | 85 | 83  | 86  | 87  |
| CONECT | 86 | 85  |     |     |
| CONECT | 87 | 75  | 85  | 88  |
| CONECT | 88 | 76  | 73  | 87  |
| CONECT | 89 | 73  | 77  | 90  |
| CONECT | 90 | 89  | 91  | 105 |
| CONECT | 91 | 90  | 92  | 93  |
| CONECT | 92 | 91  |     |     |
| CONECT | 93 | 91  | 94  | 95  |
| CONECT | 94 | 93  |     |     |
| CONECT | 95 | 93  | 96  | 104 |
| CONECT | 96 | 95  | 97  | 98  |
| CONECT | 97 | 96  |     |     |
| CONECT | 98 | 96  | 99  | 100 |
| CONECT | 99 | 98  |     |     |

|         |     |     |     |     |
|---------|-----|-----|-----|-----|
| CONNECT | 100 | 98  | 101 | 102 |
| CONNECT | 101 | 100 |     |     |
| CONNECT | 102 | 100 | 103 | 104 |
| CONNECT | 103 | 102 |     |     |
| CONNECT | 104 | 95  | 102 | 105 |
| CONNECT | 105 | 90  | 104 | 106 |
| CONNECT | 106 | 105 |     |     |
| CONNECT | 107 | 78  | 74  |     |
| CONNECT | 108 | 123 | 124 |     |
| CONNECT | 109 | 142 |     |     |
| CONNECT | 110 | 114 | 122 |     |
| CONNECT | 111 | 112 | 123 |     |
| CONNECT | 112 | 111 | 124 |     |
| CONNECT | 113 | 72  | 142 |     |
| CONNECT | 114 | 110 | 115 | 116 |
| CONNECT | 115 | 114 |     |     |
| CONNECT | 116 | 114 | 117 | 118 |
| CONNECT | 117 | 116 |     |     |
| CONNECT | 118 | 116 | 119 | 120 |
| CONNECT | 119 | 118 |     |     |
| CONNECT | 120 | 118 | 121 | 122 |
| CONNECT | 121 | 120 |     |     |
| CONNECT | 122 | 120 | 110 | 123 |
| CONNECT | 123 | 108 | 111 | 122 |
| CONNECT | 124 | 108 | 112 | 125 |
| CONNECT | 125 | 124 | 126 | 140 |
| CONNECT | 126 | 125 | 127 | 128 |
| CONNECT | 127 | 126 |     |     |
| CONNECT | 128 | 126 | 129 | 130 |
| CONNECT | 129 | 128 |     |     |
| CONNECT | 130 | 128 | 131 | 139 |
| CONNECT | 131 | 130 | 132 | 133 |
| CONNECT | 132 | 131 |     |     |
| CONNECT | 133 | 131 | 134 | 135 |
| CONNECT | 134 | 133 |     |     |
| CONNECT | 135 | 133 | 136 | 137 |
| CONNECT | 136 | 135 |     |     |
| CONNECT | 137 | 135 | 138 | 139 |
| CONNECT | 138 | 137 |     |     |
| CONNECT | 139 | 130 | 137 | 140 |
| CONNECT | 140 | 139 | 125 | 141 |
| CONNECT | 141 | 140 |     |     |
| CONNECT | 142 | 109 | 113 |     |
| CONNECT | 143 | 149 | 184 |     |
| CONNECT | 144 | 159 | 160 |     |
| CONNECT | 145 | 178 |     |     |
| CONNECT | 146 | 150 | 158 |     |
| CONNECT | 147 | 148 | 159 |     |
| CONNECT | 148 | 147 | 160 |     |
| CONNECT | 149 | 143 | 178 |     |
| CONNECT | 150 | 146 | 151 | 152 |
| CONNECT | 151 | 150 |     |     |
| CONNECT | 152 | 150 | 153 | 154 |
| CONNECT | 153 | 152 |     |     |
| CONNECT | 154 | 152 | 155 | 156 |
| CONNECT | 155 | 154 |     |     |
| CONNECT | 156 | 154 | 157 | 158 |

|        |     |     |     |     |
|--------|-----|-----|-----|-----|
| CONECT | 157 | 156 |     |     |
| CONECT | 158 | 146 | 156 | 159 |
| CONECT | 159 | 144 | 147 | 158 |
| CONECT | 160 | 144 | 148 | 161 |
| CONECT | 161 | 160 | 162 | 176 |
| CONECT | 162 | 161 | 163 | 164 |
| CONECT | 163 | 162 |     |     |
| CONECT | 164 | 162 | 165 | 166 |
| CONECT | 165 | 164 |     |     |
| CONECT | 166 | 164 | 167 | 175 |
| CONECT | 167 | 166 | 168 | 169 |
| CONECT | 168 | 167 |     |     |
| CONECT | 169 | 167 | 170 | 171 |
| CONECT | 170 | 169 |     |     |
| CONECT | 171 | 169 | 172 | 173 |
| CONECT | 172 | 171 |     |     |
| CONECT | 173 | 171 | 174 | 175 |
| CONECT | 174 | 173 |     |     |
| CONECT | 175 | 166 | 173 | 176 |
| CONECT | 176 | 161 | 175 | 177 |
| CONECT | 177 | 176 |     |     |
| CONECT | 178 | 149 | 145 |     |
| CONECT | 179 | 194 | 195 |     |
| CONECT | 180 | 213 |     |     |
| CONECT | 181 | 185 | 193 |     |
| CONECT | 182 | 183 | 194 |     |
| CONECT | 183 | 182 | 195 |     |
| CONECT | 184 | 143 | 213 |     |
| CONECT | 185 | 181 | 186 | 187 |
| CONECT | 186 | 185 |     |     |
| CONECT | 187 | 185 | 188 | 189 |
| CONECT | 188 | 187 |     |     |
| CONECT | 189 | 187 | 190 | 191 |
| CONECT | 190 | 189 |     |     |
| CONECT | 191 | 189 | 192 | 193 |
| CONECT | 192 | 191 |     |     |
| CONECT | 193 | 181 | 191 | 194 |
| CONECT | 194 | 193 | 179 | 182 |
| CONECT | 195 | 179 | 183 | 196 |
| CONECT | 196 | 195 | 197 | 211 |
| CONECT | 197 | 196 | 198 | 199 |
| CONECT | 198 | 197 |     |     |
| CONECT | 199 | 197 | 200 | 201 |
| CONECT | 200 | 199 |     |     |
| CONECT | 201 | 199 | 202 | 210 |
| CONECT | 202 | 201 | 203 | 204 |
| CONECT | 203 | 202 |     |     |
| CONECT | 204 | 202 | 205 | 206 |
| CONECT | 205 | 204 |     |     |
| CONECT | 206 | 204 | 207 | 208 |
| CONECT | 207 | 206 |     |     |
| CONECT | 208 | 206 | 209 | 210 |
| CONECT | 209 | 208 |     |     |
| CONECT | 210 | 201 | 208 | 211 |
| CONECT | 211 | 210 | 196 | 212 |
| CONECT | 212 | 211 |     |     |
| CONECT | 213 | 180 | 184 |     |

|        |     |     |     |     |
|--------|-----|-----|-----|-----|
| CONECT | 214 | 220 | 255 |     |
| CONECT | 215 | 230 | 231 |     |
| CONECT | 216 | 249 |     |     |
| CONECT | 217 | 221 | 229 |     |
| CONECT | 218 | 219 | 230 |     |
| CONECT | 219 | 218 | 231 |     |
| CONECT | 220 | 214 | 249 |     |
| CONECT | 221 | 217 | 222 | 223 |
| CONECT | 222 | 221 |     |     |
| CONECT | 223 | 221 | 224 | 225 |
| CONECT | 224 | 223 |     |     |
| CONECT | 225 | 223 | 226 | 227 |
| CONECT | 226 | 225 |     |     |
| CONECT | 227 | 225 | 228 | 229 |
| CONECT | 228 | 227 |     |     |
| CONECT | 229 | 217 | 227 | 230 |
| CONECT | 230 | 229 | 215 | 218 |
| CONECT | 231 | 215 | 219 | 232 |
| CONECT | 232 | 231 | 233 | 247 |
| CONECT | 233 | 232 | 234 | 235 |
| CONECT | 234 | 233 |     |     |
| CONECT | 235 | 233 | 236 | 237 |
| CONECT | 236 | 235 |     |     |
| CONECT | 237 | 235 | 238 | 246 |
| CONECT | 238 | 237 | 239 | 240 |
| CONECT | 239 | 238 |     |     |
| CONECT | 240 | 238 | 241 | 242 |
| CONECT | 241 | 240 |     |     |
| CONECT | 242 | 240 | 243 | 244 |
| CONECT | 243 | 242 |     |     |
| CONECT | 244 | 242 | 245 | 246 |
| CONECT | 245 | 244 |     |     |
| CONECT | 246 | 237 | 244 | 247 |
| CONECT | 247 | 232 | 246 | 248 |
| CONECT | 248 | 247 |     |     |
| CONECT | 249 | 216 | 220 |     |
| CONECT | 250 | 265 | 266 |     |
| CONECT | 251 | 284 |     |     |
| CONECT | 252 | 256 | 264 |     |
| CONECT | 253 | 254 | 265 |     |
| CONECT | 254 | 253 | 266 |     |
| CONECT | 255 | 214 | 284 |     |
| CONECT | 256 | 252 | 257 | 258 |
| CONECT | 257 | 256 |     |     |
| CONECT | 258 | 256 | 259 | 260 |
| CONECT | 259 | 258 |     |     |
| CONECT | 260 | 258 | 261 | 262 |
| CONECT | 261 | 260 |     |     |
| CONECT | 262 | 260 | 263 | 264 |
| CONECT | 263 | 262 |     |     |
| CONECT | 264 | 262 | 252 | 265 |
| CONECT | 265 | 250 | 253 | 264 |
| CONECT | 266 | 250 | 254 | 267 |
| CONECT | 267 | 266 | 268 | 282 |
| CONECT | 268 | 267 | 269 | 270 |
| CONECT | 269 | 268 |     |     |
| CONECT | 270 | 268 | 271 | 272 |

|         |     |     |     |     |
|---------|-----|-----|-----|-----|
| CONNECT | 271 | 270 |     |     |
| CONNECT | 272 | 270 | 273 | 281 |
| CONNECT | 273 | 272 | 274 | 275 |
| CONNECT | 274 | 273 |     |     |
| CONNECT | 275 | 273 | 276 | 277 |
| CONNECT | 276 | 275 |     |     |
| CONNECT | 277 | 275 | 278 | 279 |
| CONNECT | 278 | 277 |     |     |
| CONNECT | 279 | 277 | 280 | 281 |
| CONNECT | 280 | 279 |     |     |
| CONNECT | 281 | 279 | 272 | 282 |
| CONNECT | 282 | 281 | 267 | 283 |
| CONNECT | 283 | 282 |     |     |
| CONNECT | 284 | 251 | 255 |     |
| CONNECT | 285 | 291 | 326 |     |
| CONNECT | 286 | 301 | 302 |     |
| CONNECT | 287 | 320 |     |     |
| CONNECT | 288 | 292 | 300 |     |
| CONNECT | 289 | 290 | 301 |     |
| CONNECT | 290 | 289 | 302 |     |
| CONNECT | 291 | 285 | 320 |     |
| CONNECT | 292 | 288 | 293 | 294 |
| CONNECT | 293 | 292 |     |     |
| CONNECT | 294 | 292 | 295 | 296 |
| CONNECT | 295 | 294 |     |     |
| CONNECT | 296 | 294 | 297 | 298 |
| CONNECT | 297 | 296 |     |     |
| CONNECT | 298 | 296 | 299 | 300 |
| CONNECT | 299 | 298 |     |     |
| CONNECT | 300 | 288 | 298 | 301 |
| CONNECT | 301 | 300 | 289 | 286 |
| CONNECT | 302 | 290 | 286 | 303 |
| CONNECT | 303 | 302 | 304 | 318 |
| CONNECT | 304 | 303 | 305 | 306 |
| CONNECT | 305 | 304 |     |     |
| CONNECT | 306 | 304 | 307 | 308 |
| CONNECT | 307 | 306 |     |     |
| CONNECT | 308 | 306 | 309 | 317 |
| CONNECT | 309 | 308 | 310 | 311 |
| CONNECT | 310 | 309 |     |     |
| CONNECT | 311 | 309 | 312 | 313 |
| CONNECT | 312 | 311 |     |     |
| CONNECT | 313 | 311 | 314 | 315 |
| CONNECT | 314 | 313 |     |     |
| CONNECT | 315 | 313 | 316 | 317 |
| CONNECT | 316 | 315 |     |     |
| CONNECT | 317 | 308 | 315 | 318 |
| CONNECT | 318 | 303 | 317 | 319 |
| CONNECT | 319 | 318 |     |     |
| CONNECT | 320 | 287 | 291 |     |
| CONNECT | 321 | 336 | 337 |     |
| CONNECT | 322 | 355 |     |     |
| CONNECT | 323 | 327 | 335 |     |
| CONNECT | 324 | 325 | 336 |     |
| CONNECT | 325 | 324 | 337 |     |
| CONNECT | 326 | 285 | 355 |     |
| CONNECT | 327 | 323 | 328 | 329 |

|         |     |     |     |     |
|---------|-----|-----|-----|-----|
| CONNECT | 328 | 327 |     |     |
| CONNECT | 329 | 327 | 330 | 331 |
| CONNECT | 330 | 329 |     |     |
| CONNECT | 331 | 329 | 332 | 333 |
| CONNECT | 332 | 331 |     |     |
| CONNECT | 333 | 331 | 334 | 335 |
| CONNECT | 334 | 333 |     |     |
| CONNECT | 335 | 333 | 323 | 336 |
| CONNECT | 336 | 321 | 324 | 335 |
| CONNECT | 337 | 321 | 325 | 338 |
| CONNECT | 338 | 337 | 339 | 353 |
| CONNECT | 339 | 338 | 340 | 341 |
| CONNECT | 340 | 339 |     |     |
| CONNECT | 341 | 339 | 342 | 343 |
| CONNECT | 342 | 341 |     |     |
| CONNECT | 343 | 341 | 344 | 352 |
| CONNECT | 344 | 343 | 345 | 346 |
| CONNECT | 345 | 344 |     |     |
| CONNECT | 346 | 344 | 347 | 348 |
| CONNECT | 347 | 346 |     |     |
| CONNECT | 348 | 346 | 349 | 350 |
| CONNECT | 349 | 348 |     |     |
| CONNECT | 350 | 348 | 351 | 352 |
| CONNECT | 351 | 350 |     |     |
| CONNECT | 352 | 343 | 350 | 353 |
| CONNECT | 353 | 338 | 352 | 354 |
| CONNECT | 354 | 353 |     |     |
| CONNECT | 355 | 322 | 326 |     |
| CONNECT | 356 | 362 | 397 |     |
| CONNECT | 357 | 372 | 373 |     |
| CONNECT | 358 | 391 |     |     |
| CONNECT | 359 | 363 | 371 |     |
| CONNECT | 360 | 361 | 372 |     |
| CONNECT | 361 | 360 | 373 |     |
| CONNECT | 362 | 356 | 391 |     |
| CONNECT | 363 | 359 | 364 | 365 |
| CONNECT | 364 | 363 |     |     |
| CONNECT | 365 | 363 | 366 | 367 |
| CONNECT | 366 | 365 |     |     |
| CONNECT | 367 | 365 | 368 | 369 |
| CONNECT | 368 | 367 |     |     |
| CONNECT | 369 | 367 | 370 | 371 |
| CONNECT | 370 | 369 |     |     |
| CONNECT | 371 | 359 | 369 | 372 |
| CONNECT | 372 | 371 | 357 | 360 |
| CONNECT | 373 | 357 | 361 | 374 |
| CONNECT | 374 | 373 | 375 | 389 |
| CONNECT | 375 | 374 | 376 | 377 |
| CONNECT | 376 | 375 |     |     |
| CONNECT | 377 | 375 | 378 | 379 |
| CONNECT | 378 | 377 |     |     |
| CONNECT | 379 | 377 | 380 | 388 |
| CONNECT | 380 | 379 | 381 | 382 |
| CONNECT | 381 | 380 |     |     |
| CONNECT | 382 | 380 | 383 | 384 |
| CONNECT | 383 | 382 |     |     |
| CONNECT | 384 | 382 | 385 | 386 |

|         |     |     |     |     |
|---------|-----|-----|-----|-----|
| CONNECT | 385 | 384 |     |     |
| CONNECT | 386 | 384 | 387 | 388 |
| CONNECT | 387 | 386 |     |     |
| CONNECT | 388 | 379 | 386 | 389 |
| CONNECT | 389 | 388 | 374 | 390 |
| CONNECT | 390 | 389 |     |     |
| CONNECT | 391 | 358 | 362 |     |
| CONNECT | 392 | 407 | 408 |     |
| CONNECT | 393 | 426 |     |     |
| CONNECT | 394 | 398 | 406 |     |
| CONNECT | 395 | 396 | 407 |     |
| CONNECT | 396 | 395 | 408 |     |
| CONNECT | 397 | 356 | 426 |     |
| CONNECT | 398 | 394 | 399 | 400 |
| CONNECT | 399 | 398 |     |     |
| CONNECT | 400 | 398 | 401 | 402 |
| CONNECT | 401 | 400 |     |     |
| CONNECT | 402 | 400 | 403 | 404 |
| CONNECT | 403 | 402 |     |     |
| CONNECT | 404 | 402 | 405 | 406 |
| CONNECT | 405 | 404 |     |     |
| CONNECT | 406 | 394 | 404 | 407 |
| CONNECT | 407 | 392 | 395 | 406 |
| CONNECT | 408 | 392 | 396 | 409 |
| CONNECT | 409 | 408 | 410 | 424 |
| CONNECT | 410 | 409 | 411 | 412 |
| CONNECT | 411 | 410 |     |     |
| CONNECT | 412 | 410 | 413 | 414 |
| CONNECT | 413 | 412 |     |     |
| CONNECT | 414 | 412 | 415 | 423 |
| CONNECT | 415 | 414 | 416 | 417 |
| CONNECT | 416 | 415 |     |     |
| CONNECT | 417 | 415 | 418 | 419 |
| CONNECT | 418 | 417 |     |     |
| CONNECT | 419 | 417 | 420 | 421 |
| CONNECT | 420 | 419 |     |     |
| CONNECT | 421 | 419 | 422 | 423 |
| CONNECT | 422 | 421 |     |     |
| CONNECT | 423 | 414 | 421 | 424 |
| CONNECT | 424 | 423 | 409 | 425 |
| CONNECT | 425 | 424 |     |     |
| CONNECT | 426 | 393 | 397 |     |
| CONNECT | 427 | 433 | 468 |     |
| CONNECT | 428 | 443 | 444 |     |
| CONNECT | 429 | 462 |     |     |
| CONNECT | 430 | 434 | 442 |     |
| CONNECT | 431 | 432 | 443 |     |
| CONNECT | 432 | 431 | 444 |     |
| CONNECT | 433 | 427 | 462 |     |
| CONNECT | 434 | 430 | 435 | 436 |
| CONNECT | 435 | 434 |     |     |
| CONNECT | 436 | 434 | 437 | 438 |
| CONNECT | 437 | 436 |     |     |
| CONNECT | 438 | 436 | 439 | 440 |
| CONNECT | 439 | 438 |     |     |
| CONNECT | 440 | 438 | 441 | 442 |
| CONNECT | 441 | 440 |     |     |

|        |     |     |     |     |
|--------|-----|-----|-----|-----|
| CONECT | 442 | 430 | 440 | 443 |
| CONECT | 443 | 428 | 431 | 442 |
| CONECT | 444 | 428 | 432 | 445 |
| CONECT | 445 | 444 | 446 | 460 |
| CONECT | 446 | 445 | 447 | 448 |
| CONECT | 447 | 446 |     |     |
| CONECT | 448 | 446 | 449 | 450 |
| CONECT | 449 | 448 |     |     |
| CONECT | 450 | 448 | 451 | 459 |
| CONECT | 451 | 450 | 452 | 453 |
| CONECT | 452 | 451 |     |     |
| CONECT | 453 | 451 | 454 | 455 |
| CONECT | 454 | 453 |     |     |
| CONECT | 455 | 453 | 456 | 457 |
| CONECT | 456 | 455 |     |     |
| CONECT | 457 | 455 | 458 | 459 |
| CONECT | 458 | 457 |     |     |
| CONECT | 459 | 450 | 457 | 460 |
| CONECT | 460 | 445 | 459 | 461 |
| CONECT | 461 | 460 |     |     |
| CONECT | 462 | 429 | 433 |     |
| CONECT | 463 | 478 | 479 |     |
| CONECT | 464 | 497 |     |     |
| CONECT | 465 | 469 | 477 |     |
| CONECT | 466 | 467 | 478 |     |
| CONECT | 467 | 466 | 479 |     |
| CONECT | 468 | 427 | 497 |     |
| CONECT | 469 | 465 | 470 | 471 |
| CONECT | 470 | 469 |     |     |
| CONECT | 471 | 469 | 472 | 473 |
| CONECT | 472 | 471 |     |     |
| CONECT | 473 | 471 | 474 | 475 |
| CONECT | 474 | 473 |     |     |
| CONECT | 475 | 473 | 476 | 477 |
| CONECT | 476 | 475 |     |     |
| CONECT | 477 | 475 | 465 | 478 |
| CONECT | 478 | 463 | 466 | 477 |
| CONECT | 479 | 463 | 467 | 480 |
| CONECT | 480 | 479 | 481 | 495 |
| CONECT | 481 | 480 | 482 | 483 |
| CONECT | 482 | 481 |     |     |
| CONECT | 483 | 481 | 484 | 485 |
| CONECT | 484 | 483 |     |     |
| CONECT | 485 | 483 | 486 | 494 |
| CONECT | 486 | 485 | 487 | 488 |
| CONECT | 487 | 486 |     |     |
| CONECT | 488 | 486 | 489 | 490 |
| CONECT | 489 | 488 |     |     |
| CONECT | 490 | 488 | 491 | 492 |
| CONECT | 491 | 490 |     |     |
| CONECT | 492 | 490 | 493 | 494 |
| CONECT | 493 | 492 |     |     |
| CONECT | 494 | 485 | 492 | 495 |
| CONECT | 495 | 494 | 480 | 496 |
| CONECT | 496 | 495 |     |     |
| CONECT | 497 | 468 | 464 |     |
| CONECT | 498 | 504 | 539 |     |



|        |     |     |     |     |
|--------|-----|-----|-----|-----|
| CONECT | 499 | 514 | 515 |     |
| CONECT | 500 | 533 |     |     |
| CONECT | 501 | 505 | 513 |     |
| CONECT | 502 | 503 | 514 |     |
| CONECT | 503 | 502 | 515 |     |
| CONECT | 504 | 498 | 533 |     |
| CONECT | 505 | 501 | 506 | 507 |
| CONECT | 506 | 505 |     |     |
| CONECT | 507 | 505 | 508 | 509 |
| CONECT | 508 | 507 |     |     |
| CONECT | 509 | 507 | 510 | 511 |
| CONECT | 510 | 509 |     |     |
| CONECT | 511 | 509 | 512 | 513 |
| CONECT | 512 | 511 |     |     |
| CONECT | 513 | 501 | 511 | 514 |
| CONECT | 514 | 499 | 502 | 513 |
| CONECT | 515 | 499 | 503 | 516 |
| CONECT | 516 | 515 | 517 | 531 |
| CONECT | 517 | 516 | 518 | 519 |
| CONECT | 518 | 517 |     |     |
| CONECT | 519 | 517 | 520 | 521 |
| CONECT | 520 | 519 |     |     |
| CONECT | 521 | 519 | 522 | 530 |
| CONECT | 522 | 521 | 523 | 524 |
| CONECT | 523 | 522 |     |     |
| CONECT | 524 | 522 | 525 | 526 |
| CONECT | 525 | 524 |     |     |
| CONECT | 526 | 524 | 527 | 528 |
| CONECT | 527 | 526 |     |     |
| CONECT | 528 | 526 | 529 | 530 |
| CONECT | 529 | 528 |     |     |
| CONECT | 530 | 521 | 528 | 531 |
| CONECT | 531 | 516 | 530 | 532 |
| CONECT | 532 | 531 |     |     |
| CONECT | 533 | 500 | 504 |     |
| CONECT | 534 | 549 | 550 |     |
| CONECT | 535 | 568 |     |     |
| CONECT | 536 | 540 | 548 |     |
| CONECT | 537 | 538 | 549 |     |
| CONECT | 538 | 537 | 550 |     |
| CONECT | 539 | 498 | 568 |     |
| CONECT | 540 | 536 | 541 | 542 |
| CONECT | 541 | 540 |     |     |
| CONECT | 542 | 540 | 543 | 544 |
| CONECT | 543 | 542 |     |     |
| CONECT | 544 | 542 | 545 | 546 |
| CONECT | 545 | 544 |     |     |
| CONECT | 546 | 544 | 547 | 548 |
| CONECT | 547 | 546 |     |     |
| CONECT | 548 | 546 | 536 | 549 |
| CONECT | 549 | 548 | 534 | 537 |
| CONECT | 550 | 534 | 538 | 551 |
| CONECT | 551 | 550 | 552 | 566 |
| CONECT | 552 | 551 | 553 | 554 |
| CONECT | 553 | 552 |     |     |
| CONECT | 554 | 552 | 555 | 556 |
| CONECT | 555 | 554 |     |     |

|         |     |     |     |     |
|---------|-----|-----|-----|-----|
| CONNECT | 556 | 554 | 557 | 565 |
| CONNECT | 557 | 556 | 558 | 559 |
| CONNECT | 558 | 557 |     |     |
| CONNECT | 559 | 557 | 560 | 561 |
| CONNECT | 560 | 559 |     |     |
| CONNECT | 561 | 559 | 562 | 563 |
| CONNECT | 562 | 561 |     |     |
| CONNECT | 563 | 561 | 564 | 565 |
| CONNECT | 564 | 563 |     |     |
| CONNECT | 565 | 563 | 556 | 566 |
| CONNECT | 566 | 551 | 565 | 567 |
| CONNECT | 567 | 566 |     |     |
| CONNECT | 568 | 535 | 539 |     |
| CONNECT | 569 | 575 | 610 |     |
| CONNECT | 570 | 585 | 586 |     |
| CONNECT | 571 | 604 |     |     |
| CONNECT | 572 | 576 | 584 |     |
| CONNECT | 573 | 574 | 585 |     |
| CONNECT | 574 | 573 | 586 |     |
| CONNECT | 575 | 569 | 604 |     |
| CONNECT | 576 | 572 | 577 | 578 |
| CONNECT | 577 | 576 |     |     |
| CONNECT | 578 | 576 | 579 | 580 |
| CONNECT | 579 | 578 |     |     |
| CONNECT | 580 | 578 | 581 | 582 |
| CONNECT | 581 | 580 |     |     |
| CONNECT | 582 | 580 | 583 | 584 |
| CONNECT | 583 | 582 |     |     |
| CONNECT | 584 | 572 | 582 | 585 |
| CONNECT | 585 | 573 | 584 | 570 |
| CONNECT | 586 | 574 | 570 | 587 |
| CONNECT | 587 | 586 | 588 | 602 |
| CONNECT | 588 | 587 | 589 | 590 |
| CONNECT | 589 | 588 |     |     |
| CONNECT | 590 | 588 | 591 | 592 |
| CONNECT | 591 | 590 |     |     |
| CONNECT | 592 | 590 | 593 | 601 |
| CONNECT | 593 | 592 | 594 | 595 |
| CONNECT | 594 | 593 |     |     |
| CONNECT | 595 | 593 | 596 | 597 |
| CONNECT | 596 | 595 |     |     |
| CONNECT | 597 | 595 | 598 | 599 |
| CONNECT | 598 | 597 |     |     |
| CONNECT | 599 | 597 | 600 | 601 |
| CONNECT | 600 | 599 |     |     |
| CONNECT | 601 | 592 | 599 | 602 |
| CONNECT | 602 | 601 | 587 | 603 |
| CONNECT | 603 | 602 |     |     |
| CONNECT | 604 | 571 | 575 |     |
| CONNECT | 605 | 620 | 621 |     |
| CONNECT | 606 | 639 |     |     |
| CONNECT | 607 | 611 | 619 |     |
| CONNECT | 608 | 609 | 620 |     |
| CONNECT | 609 | 608 | 621 |     |
| CONNECT | 610 | 569 | 639 |     |
| CONNECT | 611 | 607 | 612 | 613 |
| CONNECT | 612 | 611 |     |     |

|         |     |     |     |     |
|---------|-----|-----|-----|-----|
| CONNECT | 613 | 611 | 614 | 615 |
| CONNECT | 614 | 613 |     |     |
| CONNECT | 615 | 613 | 616 | 617 |
| CONNECT | 616 | 615 |     |     |
| CONNECT | 617 | 615 | 618 | 619 |
| CONNECT | 618 | 617 |     |     |
| CONNECT | 619 | 607 | 617 | 620 |
| CONNECT | 620 | 605 | 619 | 608 |
| CONNECT | 621 | 605 | 609 | 622 |
| CONNECT | 622 | 621 | 623 | 637 |
| CONNECT | 623 | 622 | 624 | 625 |
| CONNECT | 624 | 623 |     |     |
| CONNECT | 625 | 623 | 626 | 627 |
| CONNECT | 626 | 625 |     |     |
| CONNECT | 627 | 625 | 628 | 636 |
| CONNECT | 628 | 627 | 629 | 630 |
| CONNECT | 629 | 628 |     |     |
| CONNECT | 630 | 628 | 631 | 632 |
| CONNECT | 631 | 630 |     |     |
| CONNECT | 632 | 630 | 633 | 634 |
| CONNECT | 633 | 632 |     |     |
| CONNECT | 634 | 632 | 635 | 636 |
| CONNECT | 635 | 634 |     |     |
| CONNECT | 636 | 627 | 634 | 637 |
| CONNECT | 637 | 636 | 622 | 638 |
| CONNECT | 638 | 637 |     |     |
| CONNECT | 639 | 606 | 610 |     |
| CONNECT | 640 | 646 | 681 |     |
| CONNECT | 641 | 656 | 657 |     |
| CONNECT | 642 | 675 |     |     |
| CONNECT | 643 | 647 | 655 |     |
| CONNECT | 644 | 645 | 656 |     |
| CONNECT | 645 | 644 | 657 |     |
| CONNECT | 646 | 640 | 675 |     |
| CONNECT | 647 | 643 | 648 | 649 |
| CONNECT | 648 | 647 |     |     |
| CONNECT | 649 | 647 | 650 | 651 |
| CONNECT | 650 | 649 |     |     |
| CONNECT | 651 | 649 | 652 | 653 |
| CONNECT | 652 | 651 |     |     |
| CONNECT | 653 | 651 | 654 | 655 |
| CONNECT | 654 | 653 |     |     |
| CONNECT | 655 | 643 | 653 | 656 |
| CONNECT | 656 | 644 | 655 | 641 |
| CONNECT | 657 | 641 | 645 | 658 |
| CONNECT | 658 | 657 | 659 | 673 |
| CONNECT | 659 | 658 | 660 | 661 |
| CONNECT | 660 | 659 |     |     |
| CONNECT | 661 | 659 | 662 | 663 |
| CONNECT | 662 | 661 |     |     |
| CONNECT | 663 | 661 | 664 | 672 |
| CONNECT | 664 | 663 | 665 | 666 |
| CONNECT | 665 | 664 |     |     |
| CONNECT | 666 | 664 | 667 | 668 |
| CONNECT | 667 | 666 |     |     |
| CONNECT | 668 | 666 | 669 | 670 |
| CONNECT | 669 | 668 |     |     |

|         |     |     |     |     |
|---------|-----|-----|-----|-----|
| CONNECT | 670 | 668 | 671 | 672 |
| CONNECT | 671 | 670 |     |     |
| CONNECT | 672 | 663 | 670 | 673 |
| CONNECT | 673 | 658 | 672 | 674 |
| CONNECT | 674 | 673 |     |     |
| CONNECT | 675 | 642 | 646 |     |
| CONNECT | 676 | 691 | 692 |     |
| CONNECT | 677 | 710 |     |     |
| CONNECT | 678 | 682 | 690 |     |
| CONNECT | 679 | 680 | 691 |     |
| CONNECT | 680 | 679 | 692 |     |
| CONNECT | 681 | 640 | 710 |     |
| CONNECT | 682 | 678 | 683 | 684 |
| CONNECT | 683 | 682 |     |     |
| CONNECT | 684 | 682 | 685 | 686 |
| CONNECT | 685 | 684 |     |     |
| CONNECT | 686 | 684 | 687 | 688 |
| CONNECT | 687 | 686 |     |     |
| CONNECT | 688 | 686 | 689 | 690 |
| CONNECT | 689 | 688 |     |     |
| CONNECT | 690 | 688 | 678 | 691 |
| CONNECT | 691 | 676 | 679 | 690 |
| CONNECT | 692 | 676 | 680 | 693 |
| CONNECT | 693 | 692 | 694 | 708 |
| CONNECT | 694 | 693 | 695 | 696 |
| CONNECT | 695 | 694 |     |     |
| CONNECT | 696 | 694 | 697 | 698 |
| CONNECT | 697 | 696 |     |     |
| CONNECT | 698 | 696 | 699 | 707 |
| CONNECT | 699 | 698 | 700 | 701 |
| CONNECT | 700 | 699 |     |     |
| CONNECT | 701 | 699 | 702 | 703 |
| CONNECT | 702 | 701 |     |     |
| CONNECT | 703 | 701 | 704 | 705 |
| CONNECT | 704 | 703 |     |     |
| CONNECT | 705 | 703 | 706 | 707 |
| CONNECT | 706 | 705 |     |     |
| CONNECT | 707 | 698 | 705 | 708 |
| CONNECT | 708 | 693 | 707 | 709 |
| CONNECT | 709 | 708 |     |     |
| CONNECT | 710 | 677 | 681 |     |
| CONNECT | 711 | 717 | 752 |     |
| CONNECT | 712 | 727 | 728 |     |
| CONNECT | 713 | 746 |     |     |
| CONNECT | 714 | 718 | 726 |     |
| CONNECT | 715 | 716 | 727 |     |
| CONNECT | 716 | 715 | 728 |     |
| CONNECT | 717 | 711 | 746 |     |
| CONNECT | 718 | 714 | 719 | 720 |
| CONNECT | 719 | 718 |     |     |
| CONNECT | 720 | 718 | 721 | 722 |
| CONNECT | 721 | 720 |     |     |
| CONNECT | 722 | 720 | 723 | 724 |
| CONNECT | 723 | 722 |     |     |
| CONNECT | 724 | 722 | 725 | 726 |
| CONNECT | 725 | 724 |     |     |
| CONNECT | 726 | 714 | 724 | 727 |

|         |     |     |     |     |
|---------|-----|-----|-----|-----|
| CONNECT | 727 | 726 | 712 | 715 |
| CONNECT | 728 | 712 | 716 | 729 |
| CONNECT | 729 | 728 | 730 | 744 |
| CONNECT | 730 | 729 | 731 | 732 |
| CONNECT | 731 | 730 |     |     |
| CONNECT | 732 | 730 | 733 | 734 |
| CONNECT | 733 | 732 |     |     |
| CONNECT | 734 | 732 | 735 | 743 |
| CONNECT | 735 | 734 | 736 | 737 |
| CONNECT | 736 | 735 |     |     |
| CONNECT | 737 | 735 | 738 | 739 |
| CONNECT | 738 | 737 |     |     |
| CONNECT | 739 | 737 | 740 | 741 |
| CONNECT | 740 | 739 |     |     |
| CONNECT | 741 | 739 | 742 | 743 |
| CONNECT | 742 | 741 |     |     |
| CONNECT | 743 | 734 | 741 | 744 |
| CONNECT | 744 | 729 | 743 | 745 |
| CONNECT | 745 | 744 |     |     |
| CONNECT | 746 | 713 | 717 |     |
| CONNECT | 747 | 762 | 763 |     |
| CONNECT | 748 | 781 |     |     |
| CONNECT | 749 | 753 | 761 |     |
| CONNECT | 750 | 751 | 762 |     |
| CONNECT | 751 | 750 | 763 |     |
| CONNECT | 752 | 711 | 781 |     |
| CONNECT | 753 | 749 | 754 | 755 |
| CONNECT | 754 | 753 |     |     |
| CONNECT | 755 | 753 | 756 | 757 |
| CONNECT | 756 | 755 |     |     |
| CONNECT | 757 | 755 | 758 | 759 |
| CONNECT | 758 | 757 |     |     |
| CONNECT | 759 | 757 | 760 | 761 |
| CONNECT | 760 | 759 |     |     |
| CONNECT | 761 | 749 | 759 | 762 |
| CONNECT | 762 | 747 | 750 | 761 |
| CONNECT | 763 | 747 | 751 | 764 |
| CONNECT | 764 | 763 | 765 | 779 |
| CONNECT | 765 | 764 | 766 | 767 |
| CONNECT | 766 | 765 |     |     |
| CONNECT | 767 | 765 | 768 | 769 |
| CONNECT | 768 | 767 |     |     |
| CONNECT | 769 | 767 | 770 | 778 |
| CONNECT | 770 | 769 | 771 | 772 |
| CONNECT | 771 | 770 |     |     |
| CONNECT | 772 | 770 | 773 | 774 |
| CONNECT | 773 | 772 |     |     |
| CONNECT | 774 | 772 | 775 | 776 |
| CONNECT | 775 | 774 |     |     |
| CONNECT | 776 | 774 | 777 | 778 |
| CONNECT | 777 | 776 |     |     |
| CONNECT | 778 | 769 | 776 | 779 |
| CONNECT | 779 | 778 | 764 | 780 |
| CONNECT | 780 | 779 |     |     |
| CONNECT | 781 | 748 | 752 |     |
| CONNECT | 782 | 788 | 823 |     |
| CONNECT | 783 | 798 | 799 |     |

|         |     |     |     |     |
|---------|-----|-----|-----|-----|
| CONNECT | 784 | 817 |     |     |
| CONNECT | 785 | 789 | 797 |     |
| CONNECT | 786 | 787 | 798 |     |
| CONNECT | 787 | 786 | 799 |     |
| CONNECT | 788 | 782 | 817 |     |
| CONNECT | 789 | 785 | 790 | 791 |
| CONNECT | 790 | 789 |     |     |
| CONNECT | 791 | 789 | 792 | 793 |
| CONNECT | 792 | 791 |     |     |
| CONNECT | 793 | 791 | 794 | 795 |
| CONNECT | 794 | 793 |     |     |
| CONNECT | 795 | 793 | 796 | 797 |
| CONNECT | 796 | 795 |     |     |
| CONNECT | 797 | 785 | 795 | 798 |
| CONNECT | 798 | 797 | 786 | 783 |
| CONNECT | 799 | 787 | 783 | 800 |
| CONNECT | 800 | 799 | 801 | 815 |
| CONNECT | 801 | 800 | 802 | 803 |
| CONNECT | 802 | 801 |     |     |
| CONNECT | 803 | 801 | 804 | 805 |
| CONNECT | 804 | 803 |     |     |
| CONNECT | 805 | 803 | 806 | 814 |
| CONNECT | 806 | 805 | 807 | 808 |
| CONNECT | 807 | 806 |     |     |
| CONNECT | 808 | 806 | 809 | 810 |
| CONNECT | 809 | 808 |     |     |
| CONNECT | 810 | 808 | 811 | 812 |
| CONNECT | 811 | 810 |     |     |
| CONNECT | 812 | 810 | 813 | 814 |
| CONNECT | 813 | 812 |     |     |
| CONNECT | 814 | 805 | 812 | 815 |
| CONNECT | 815 | 814 | 800 | 816 |
| CONNECT | 816 | 815 |     |     |
| CONNECT | 817 | 784 | 788 |     |
| CONNECT | 818 | 833 | 834 |     |
| CONNECT | 819 | 852 |     |     |
| CONNECT | 820 | 824 | 832 |     |
| CONNECT | 821 | 822 | 833 |     |
| CONNECT | 822 | 821 | 834 |     |
| CONNECT | 823 | 782 | 852 |     |
| CONNECT | 824 | 820 | 825 | 826 |
| CONNECT | 825 | 824 |     |     |
| CONNECT | 826 | 824 | 827 | 828 |
| CONNECT | 827 | 826 |     |     |
| CONNECT | 828 | 826 | 829 | 830 |
| CONNECT | 829 | 828 |     |     |
| CONNECT | 830 | 828 | 831 | 832 |
| CONNECT | 831 | 830 |     |     |
| CONNECT | 832 | 830 | 820 | 833 |
| CONNECT | 833 | 818 | 821 | 832 |
| CONNECT | 834 | 818 | 822 | 835 |
| CONNECT | 835 | 834 | 836 | 850 |
| CONNECT | 836 | 835 | 837 | 838 |
| CONNECT | 837 | 836 |     |     |
| CONNECT | 838 | 836 | 839 | 840 |
| CONNECT | 839 | 838 |     |     |
| CONNECT | 840 | 838 | 841 | 849 |

|        |     |     |     |     |
|--------|-----|-----|-----|-----|
| CONECT | 841 | 840 | 842 | 843 |
| CONECT | 842 | 841 |     |     |
| CONECT | 843 | 841 | 844 | 845 |
| CONECT | 844 | 843 |     |     |
| CONECT | 845 | 843 | 846 | 847 |
| CONECT | 846 | 845 |     |     |
| CONECT | 847 | 845 | 848 | 849 |
| CONECT | 848 | 847 |     |     |
| CONECT | 849 | 840 | 847 | 850 |
| CONECT | 850 | 835 | 849 | 851 |
| CONECT | 851 | 850 |     |     |
| CONECT | 852 | 819 | 823 |     |
| CONECT | 853 | 859 | 894 |     |
| CONECT | 854 | 869 | 870 |     |
| CONECT | 855 | 888 |     |     |
| CONECT | 856 | 860 | 868 |     |
| CONECT | 857 | 858 | 869 |     |
| CONECT | 858 | 857 | 870 |     |
| CONECT | 859 | 853 | 888 |     |
| CONECT | 860 | 856 | 861 | 862 |
| CONECT | 861 | 860 |     |     |
| CONECT | 862 | 860 | 863 | 864 |
| CONECT | 863 | 862 |     |     |
| CONECT | 864 | 862 | 865 | 866 |
| CONECT | 865 | 864 |     |     |
| CONECT | 866 | 864 | 867 | 868 |
| CONECT | 867 | 866 |     |     |
| CONECT | 868 | 856 | 866 | 869 |
| CONECT | 869 | 857 | 868 | 854 |
| CONECT | 870 | 858 | 854 | 871 |
| CONECT | 871 | 870 | 872 | 886 |
| CONECT | 872 | 871 | 873 | 874 |
| CONECT | 873 | 872 |     |     |
| CONECT | 874 | 872 | 875 | 876 |
| CONECT | 875 | 874 |     |     |
| CONECT | 876 | 874 | 877 | 885 |
| CONECT | 877 | 876 | 878 | 879 |
| CONECT | 878 | 877 |     |     |
| CONECT | 879 | 877 | 880 | 881 |
| CONECT | 880 | 879 |     |     |
| CONECT | 881 | 879 | 882 | 883 |
| CONECT | 882 | 881 |     |     |
| CONECT | 883 | 881 | 884 | 885 |
| CONECT | 884 | 883 |     |     |
| CONECT | 885 | 883 | 876 | 886 |
| CONECT | 886 | 871 | 885 | 887 |
| CONECT | 887 | 886 |     |     |
| CONECT | 888 | 855 | 859 |     |
| CONECT | 889 | 904 | 905 |     |
| CONECT | 890 | 923 |     |     |
| CONECT | 891 | 895 | 903 |     |
| CONECT | 892 | 893 | 904 |     |
| CONECT | 893 | 892 | 905 |     |
| CONECT | 894 | 853 | 923 |     |
| CONECT | 895 | 891 | 896 | 897 |
| CONECT | 896 | 895 |     |     |
| CONECT | 897 | 895 | 898 | 899 |

|         |     |     |     |     |
|---------|-----|-----|-----|-----|
| CONNECT | 898 | 897 |     |     |
| CONNECT | 899 | 897 | 900 | 901 |
| CONNECT | 900 | 899 |     |     |
| CONNECT | 901 | 899 | 902 | 903 |
| CONNECT | 902 | 901 |     |     |
| CONNECT | 903 | 901 | 891 | 904 |
| CONNECT | 904 | 889 | 892 | 903 |
| CONNECT | 905 | 889 | 893 | 906 |
| CONNECT | 906 | 905 | 907 | 921 |
| CONNECT | 907 | 906 | 908 | 909 |
| CONNECT | 908 | 907 |     |     |
| CONNECT | 909 | 907 | 910 | 911 |
| CONNECT | 910 | 909 |     |     |
| CONNECT | 911 | 909 | 912 | 920 |
| CONNECT | 912 | 911 | 913 | 914 |
| CONNECT | 913 | 912 |     |     |
| CONNECT | 914 | 912 | 915 | 916 |
| CONNECT | 915 | 914 |     |     |
| CONNECT | 916 | 914 | 917 | 918 |
| CONNECT | 917 | 916 |     |     |
| CONNECT | 918 | 916 | 919 | 920 |
| CONNECT | 919 | 918 |     |     |
| CONNECT | 920 | 911 | 918 | 921 |
| CONNECT | 921 | 906 | 920 | 922 |
| CONNECT | 922 | 921 |     |     |
| CONNECT | 923 | 890 | 894 |     |
| CONNECT | 924 | 930 | 965 |     |
| CONNECT | 925 | 940 | 941 |     |
| CONNECT | 926 | 959 |     |     |
| CONNECT | 927 | 931 | 939 |     |
| CONNECT | 928 | 929 | 940 |     |
| CONNECT | 929 | 928 | 941 |     |
| CONNECT | 930 | 924 | 959 |     |
| CONNECT | 931 | 927 | 932 | 933 |
| CONNECT | 932 | 931 |     |     |
| CONNECT | 933 | 931 | 934 | 935 |
| CONNECT | 934 | 933 |     |     |
| CONNECT | 935 | 933 | 936 | 937 |
| CONNECT | 936 | 935 |     |     |
| CONNECT | 937 | 935 | 938 | 939 |
| CONNECT | 938 | 937 |     |     |
| CONNECT | 939 | 927 | 937 | 940 |
| CONNECT | 940 | 925 | 928 | 939 |
| CONNECT | 941 | 925 | 929 | 942 |
| CONNECT | 942 | 941 | 943 | 957 |
| CONNECT | 943 | 942 | 944 | 945 |
| CONNECT | 944 | 943 |     |     |
| CONNECT | 945 | 943 | 946 | 947 |
| CONNECT | 946 | 945 |     |     |
| CONNECT | 947 | 945 | 948 | 956 |
| CONNECT | 948 | 947 | 949 | 950 |
| CONNECT | 949 | 948 |     |     |
| CONNECT | 950 | 948 | 951 | 952 |
| CONNECT | 951 | 950 |     |     |
| CONNECT | 952 | 950 | 953 | 954 |
| CONNECT | 953 | 952 |     |     |
| CONNECT | 954 | 952 | 955 | 956 |



|         |      |      |      |      |
|---------|------|------|------|------|
| CONNECT | 955  | 954  |      |      |
| CONNECT | 956  | 947  | 954  | 957  |
| CONNECT | 957  | 942  | 956  | 958  |
| CONNECT | 958  | 957  |      |      |
| CONNECT | 959  | 926  | 930  |      |
| CONNECT | 960  | 975  | 976  |      |
| CONNECT | 961  | 994  |      |      |
| CONNECT | 962  | 966  | 974  |      |
| CONNECT | 963  | 964  | 975  |      |
| CONNECT | 964  | 963  | 976  |      |
| CONNECT | 965  | 924  | 994  |      |
| CONNECT | 966  | 962  | 967  | 968  |
| CONNECT | 967  | 966  |      |      |
| CONNECT | 968  | 966  | 969  | 970  |
| CONNECT | 969  | 968  |      |      |
| CONNECT | 970  | 968  | 971  | 972  |
| CONNECT | 971  | 970  |      |      |
| CONNECT | 972  | 970  | 973  | 974  |
| CONNECT | 973  | 972  |      |      |
| CONNECT | 974  | 962  | 972  | 975  |
| CONNECT | 975  | 974  | 960  | 963  |
| CONNECT | 976  | 960  | 964  | 977  |
| CONNECT | 977  | 976  | 978  | 992  |
| CONNECT | 978  | 977  | 979  | 980  |
| CONNECT | 979  | 978  |      |      |
| CONNECT | 980  | 978  | 981  | 982  |
| CONNECT | 981  | 980  |      |      |
| CONNECT | 982  | 980  | 983  | 991  |
| CONNECT | 983  | 982  | 984  | 985  |
| CONNECT | 984  | 983  |      |      |
| CONNECT | 985  | 983  | 986  | 987  |
| CONNECT | 986  | 985  |      |      |
| CONNECT | 987  | 985  | 988  | 989  |
| CONNECT | 988  | 987  |      |      |
| CONNECT | 989  | 987  | 990  | 991  |
| CONNECT | 990  | 989  |      |      |
| CONNECT | 991  | 982  | 989  | 992  |
| CONNECT | 992  | 991  | 977  | 993  |
| CONNECT | 993  | 992  |      |      |
| CONNECT | 994  | 961  | 965  |      |
| CONNECT | 995  | 1001 | 1036 |      |
| CONNECT | 996  | 1011 | 1012 |      |
| CONNECT | 997  | 1030 |      |      |
| CONNECT | 998  | 1002 | 1010 |      |
| CONNECT | 999  | 1000 | 1011 |      |
| CONNECT | 1000 | 999  | 1012 |      |
| CONNECT | 1001 | 995  | 1030 |      |
| CONNECT | 1002 | 998  | 1003 | 1004 |
| CONNECT | 1003 | 1002 |      |      |
| CONNECT | 1004 | 1002 | 1005 | 1006 |
| CONNECT | 1005 | 1004 |      |      |
| CONNECT | 1006 | 1004 | 1007 | 1008 |
| CONNECT | 1007 | 1006 |      |      |
| CONNECT | 1008 | 1006 | 1009 | 1010 |
| CONNECT | 1009 | 1008 |      |      |
| CONNECT | 1010 | 998  | 1008 | 1011 |
| CONNECT | 1011 | 996  | 999  | 1010 |

CONNECT 1012 996 1000 1013  
CONNECT 1013 1012 1014 1028  
CONNECT 1014 1013 1015 1016  
CONNECT 1015 1014  
CONNECT 1016 1014 1017 1018  
CONNECT 1017 1016  
CONNECT 1018 1016 1019 1027  
CONNECT 1019 1018 1020 1021  
CONNECT 1020 1019  
CONNECT 1021 1019 1022 1023  
CONNECT 1022 1021  
CONNECT 1023 1021 1024 1025  
CONNECT 1024 1023  
CONNECT 1025 1023 1026 1027  
CONNECT 1026 1025  
CONNECT 1027 1018 1025 1028  
CONNECT 1028 1013 1027 1029  
CONNECT 1029 1028  
CONNECT 1030 997 1001  
CONNECT 1031 1046 1047  
CONNECT 1032 1065  
CONNECT 1033 1037 1045  
CONNECT 1034 1035 1046  
CONNECT 1035 1034 1047  
CONNECT 1036 995 1065  
CONNECT 1037 1033 1038 1039  
CONNECT 1038 1037  
CONNECT 1039 1037 1040 1041  
CONNECT 1040 1039  
CONNECT 1041 1039 1042 1043  
CONNECT 1042 1041  
CONNECT 1043 1041 1044 1045  
CONNECT 1044 1043  
CONNECT 1045 1043 1033 1046  
CONNECT 1046 1031 1045 1034  
CONNECT 1047 1031 1035 1048  
CONNECT 1048 1047 1049 1063  
CONNECT 1049 1048 1050 1051  
CONNECT 1050 1049  
CONNECT 1051 1049 1052 1053  
CONNECT 1052 1051  
CONNECT 1053 1051 1054 1062  
CONNECT 1054 1053 1055 1056  
CONNECT 1055 1054  
CONNECT 1056 1054 1057 1058  
CONNECT 1057 1056  
CONNECT 1058 1056 1059 1060  
CONNECT 1059 1058  
CONNECT 1060 1058 1061 1062  
CONNECT 1061 1060  
CONNECT 1062 1060 1053 1063  
CONNECT 1063 1048 1062 1064  
CONNECT 1064 1063  
CONNECT 1065 1032 1036

TITLE CSD ENTRY jmk-126-9-90kslow  
REMARK 1 File created by GaussView 6.0.16

|        |    |    |   |        |        |        |
|--------|----|----|---|--------|--------|--------|
| HETATM | 1  | Fe | 0 | 18.380 | 6.240  | 0.757  |
| Fe     |    |    |   |        |        |        |
| HETATM | 2  | S  | 0 | 22.643 | 7.032  | 1.570  |
| S      |    |    |   |        |        |        |
| HETATM | 3  | S  | 0 | 17.251 | 8.932  | 4.482  |
| S      |    |    |   |        |        |        |
| HETATM | 4  | N  | 0 | 19.242 | 5.025  | 2.125  |
| N      |    |    |   |        |        |        |
| HETATM | 5  | N  | 0 | 20.219 | 7.028  | 0.793  |
| N      |    |    |   |        |        |        |
| HETATM | 6  | N  | 0 | 20.790 | 8.090  | 0.144  |
| N      |    |    |   |        |        |        |
| HETATM | 7  | N  | 0 | 17.855 | 7.422  | 2.205  |
| N      |    |    |   |        |        |        |
| HETATM | 8  | C  | 0 | 18.673 | 4.046  | 2.816  |
| C      |    |    |   |        |        |        |
| HETATM | 9  | H  | 0 | 17.744 | 3.888  | 2.703  |
| H      |    |    |   |        |        |        |
| HETATM | 10 | C  | 0 | 19.386 | 3.246  | 3.698  |
| C      |    |    |   |        |        |        |
| HETATM | 11 | H  | 0 | 18.946 | 2.540  | 4.158  |
| H      |    |    |   |        |        |        |
| HETATM | 12 | C  | 0 | 20.720 | 3.472  | 3.909  |
| C      |    |    |   |        |        |        |
| HETATM | 13 | H  | 0 | 21.216 | 2.928  | 4.509  |
| H      |    |    |   |        |        |        |
| HETATM | 14 | C  | 0 | 21.329 | 4.509  | 3.227  |
| C      |    |    |   |        |        |        |
| HETATM | 15 | H  | 0 | 22.250 | 4.701  | 3.360  |
| H      |    |    |   |        |        |        |
| HETATM | 16 | C  | 0 | 20.568 | 5.267  | 2.345  |
| C      |    |    |   |        |        |        |
| HETATM | 17 | C  | 0 | 21.051 | 6.389  | 1.575  |
| C      |    |    |   |        |        |        |
| HETATM | 18 | C  | 0 | 22.054 | 8.216  | 0.434  |
| C      |    |    |   |        |        |        |
| HETATM | 19 | C  | 0 | 22.947 | 9.241  | -0.123 |
| C      |    |    |   |        |        |        |
| HETATM | 20 | C  | 0 | 22.423 | 10.314 | -0.881 |
| C      |    |    |   |        |        |        |
| HETATM | 21 | H  | 0 | 21.484 | 10.385 | -1.004 |
| H      |    |    |   |        |        |        |
| HETATM | 22 | C  | 0 | 23.240 | 11.240 | -1.433 |
| C      |    |    |   |        |        |        |
| HETATM | 23 | H  | 0 | 22.866 | 11.958 | -1.930 |
| H      |    |    |   |        |        |        |
| HETATM | 24 | C  | 0 | 24.651 | 11.155 | -1.281 |
| C      |    |    |   |        |        |        |
| HETATM | 25 | C  | 0 | 25.538 | 12.085 | -1.862 |
| C      |    |    |   |        |        |        |
| HETATM | 26 | H  | 0 | 25.191 | 12.809 | -2.371 |
| H      |    |    |   |        |        |        |
| HETATM | 27 | C  | 0 | 26.895 | 11.959 | -1.704 |
| C      |    |    |   |        |        |        |
| HETATM | 28 | H  | 0 | 27.476 | 12.596 | -2.103 |
| H      |    |    |   |        |        |        |

|        |    |   |   |        |        |        |
|--------|----|---|---|--------|--------|--------|
| HETATM | 29 | C | 0 | 27.434 | 10.893 | -0.955 |
| C      |    |   |   |        |        |        |
| HETATM | 30 | H | 0 | 28.374 | 10.814 | -0.850 |
| H      |    |   |   |        |        |        |
| HETATM | 31 | C | 0 | 26.604 | 9.974  | -0.381 |
| C      |    |   |   |        |        |        |
| HETATM | 32 | H | 0 | 26.973 | 9.259  | 0.121  |
| H      |    |   |   |        |        |        |
| HETATM | 33 | C | 0 | 25.192 | 10.075 | -0.528 |
| C      |    |   |   |        |        |        |
| HETATM | 34 | C | 0 | 24.314 | 9.138  | 0.042  |
| C      |    |   |   |        |        |        |
| HETATM | 35 | H | 0 | 24.668 | 8.418  | 0.552  |
| H      |    |   |   |        |        |        |
| HETATM | 36 | C | 0 | 17.614 | 8.050  | 3.134  |
| C      |    |   |   |        |        |        |
| HETATM | 37 | S | 0 | 14.117 | 5.447  | -0.057 |
| S      |    |   |   |        |        |        |
| HETATM | 38 | S | 0 | 19.509 | 3.547  | -2.970 |
| S      |    |   |   |        |        |        |
| HETATM | 39 | N | 0 | 17.518 | 7.455  | -0.613 |
| N      |    |   |   |        |        |        |
| HETATM | 40 | N | 0 | 16.541 | 5.451  | 0.719  |
| N      |    |   |   |        |        |        |
| HETATM | 41 | N | 0 | 15.970 | 4.389  | 1.368  |
| N      |    |   |   |        |        |        |
| HETATM | 42 | N | 0 | 18.905 | 5.058  | -0.693 |
| N      |    |   |   |        |        |        |
| HETATM | 43 | C | 0 | 18.087 | 8.433  | -1.303 |
| C      |    |   |   |        |        |        |
| HETATM | 44 | H | 0 | 19.017 | 8.592  | -1.190 |
| H      |    |   |   |        |        |        |
| HETATM | 45 | C | 0 | 17.374 | 9.233  | -2.185 |
| C      |    |   |   |        |        |        |
| HETATM | 46 | H | 0 | 17.814 | 9.939  | -2.646 |
| H      |    |   |   |        |        |        |
| HETATM | 47 | C | 0 | 16.040 | 9.007  | -2.397 |
| C      |    |   |   |        |        |        |
| HETATM | 48 | H | 0 | 15.545 | 9.551  | -2.997 |
| H      |    |   |   |        |        |        |
| HETATM | 49 | C | 0 | 15.431 | 7.970  | -1.715 |
| C      |    |   |   |        |        |        |
| HETATM | 50 | H | 0 | 14.511 | 7.778  | -1.848 |
| H      |    |   |   |        |        |        |
| HETATM | 51 | C | 0 | 16.192 | 7.212  | -0.832 |
| C      |    |   |   |        |        |        |
| HETATM | 52 | C | 0 | 15.709 | 6.090  | -0.063 |
| C      |    |   |   |        |        |        |
| HETATM | 53 | C | 0 | 14.707 | 4.263  | 1.079  |
| C      |    |   |   |        |        |        |
| HETATM | 54 | C | 0 | 13.813 | 3.238  | 1.636  |
| C      |    |   |   |        |        |        |
| HETATM | 55 | C | 0 | 14.337 | 2.166  | 2.393  |
| C      |    |   |   |        |        |        |
| HETATM | 56 | H | 0 | 15.277 | 2.094  | 2.516  |
| H      |    |   |   |        |        |        |

|        |    |    |   |        |        |        |
|--------|----|----|---|--------|--------|--------|
| HETATM | 57 | C  | 0 | 13.520 | 1.239  | 2.945  |
| C      |    |    |   |        |        |        |
| HETATM | 58 | H  | 0 | 13.895 | 0.521  | 3.442  |
| H      |    |    |   |        |        |        |
| HETATM | 59 | C  | 0 | 12.109 | 1.324  | 2.793  |
| C      |    |    |   |        |        |        |
| HETATM | 60 | C  | 0 | 11.222 | 0.394  | 3.375  |
| C      |    |    |   |        |        |        |
| HETATM | 61 | H  | 0 | 11.569 | -0.329 | 3.883  |
| H      |    |    |   |        |        |        |
| HETATM | 62 | C  | 0 | 9.866  | 0.521  | 3.217  |
| C      |    |    |   |        |        |        |
| HETATM | 63 | H  | 0 | 9.284  | -0.116 | 3.615  |
| H      |    |    |   |        |        |        |
| HETATM | 64 | C  | 0 | 9.327  | 1.587  | 2.467  |
| C      |    |    |   |        |        |        |
| HETATM | 65 | H  | 0 | 8.386  | 1.665  | 2.362  |
| H      |    |    |   |        |        |        |
| HETATM | 66 | C  | 0 | 10.157 | 2.504  | 1.893  |
| C      |    |    |   |        |        |        |
| HETATM | 67 | H  | 0 | 9.788  | 3.220  | 1.391  |
| H      |    |    |   |        |        |        |
| HETATM | 68 | C  | 0 | 11.568 | 2.404  | 2.040  |
| C      |    |    |   |        |        |        |
| HETATM | 69 | C  | 0 | 12.446 | 3.341  | 1.470  |
| C      |    |    |   |        |        |        |
| HETATM | 70 | H  | 0 | 12.093 | 4.061  | 0.960  |
| H      |    |    |   |        |        |        |
| HETATM | 71 | C  | 0 | 19.148 | 4.430  | -1.622 |
| C      |    |    |   |        |        |        |
| HETATM | 72 | Fe | 0 | 14.551 | -5.509 | 0.284  |
| Fe     |    |    |   |        |        |        |
| HETATM | 73 | S  | 0 | 18.813 | -4.717 | 1.098  |
| S      |    |    |   |        |        |        |
| HETATM | 74 | S  | 0 | 13.422 | -2.816 | 4.010  |
| S      |    |    |   |        |        |        |
| HETATM | 75 | N  | 0 | 15.413 | -6.724 | 1.653  |
| N      |    |    |   |        |        |        |
| HETATM | 76 | N  | 0 | 16.390 | -4.720 | 0.321  |
| N      |    |    |   |        |        |        |
| HETATM | 77 | N  | 0 | 16.961 | -3.658 | -0.327 |
| N      |    |    |   |        |        |        |
| HETATM | 78 | N  | 0 | 14.026 | -4.326 | 1.734  |
| N      |    |    |   |        |        |        |
| HETATM | 79 | C  | 0 | 14.844 | -7.701 | 2.344  |
| C      |    |    |   |        |        |        |
| HETATM | 80 | H  | 0 | 13.914 | -7.861 | 2.231  |
| H      |    |    |   |        |        |        |
| HETATM | 81 | C  | 0 | 15.556 | -8.503 | 3.226  |
| C      |    |    |   |        |        |        |
| HETATM | 82 | H  | 0 | 15.116 | -9.209 | 3.686  |
| H      |    |    |   |        |        |        |
| HETATM | 83 | C  | 0 | 16.890 | -8.277 | 3.438  |
| C      |    |    |   |        |        |        |
| HETATM | 84 | H  | 0 | 17.386 | -8.821 | 4.037  |
| H      |    |    |   |        |        |        |

|        |     |   |   |        |        |        |
|--------|-----|---|---|--------|--------|--------|
| HETATM | 85  | C | 0 | 17.499 | -7.240 | 2.756  |
| C      |     |   |   |        |        |        |
| HETATM | 86  | H | 0 | 18.420 | -7.047 | 2.889  |
| H      |     |   |   |        |        |        |
| HETATM | 87  | C | 0 | 16.738 | -6.482 | 1.873  |
| C      |     |   |   |        |        |        |
| HETATM | 88  | C | 0 | 17.222 | -5.360 | 1.104  |
| C      |     |   |   |        |        |        |
| HETATM | 89  | C | 0 | 18.224 | -3.533 | -0.038 |
| C      |     |   |   |        |        |        |
| HETATM | 90  | C | 0 | 19.118 | -2.507 | -0.596 |
| C      |     |   |   |        |        |        |
| HETATM | 91  | C | 0 | 18.594 | -1.435 | -1.352 |
| C      |     |   |   |        |        |        |
| HETATM | 92  | H | 0 | 17.654 | -1.364 | -1.475 |
| H      |     |   |   |        |        |        |
| HETATM | 93  | C | 0 | 19.410 | -0.509 | -1.905 |
| C      |     |   |   |        |        |        |
| HETATM | 94  | H | 0 | 19.036 | 0.210  | -2.401 |
| H      |     |   |   |        |        |        |
| HETATM | 95  | C | 0 | 20.821 | -0.594 | -1.753 |
| C      |     |   |   |        |        |        |
| HETATM | 96  | C | 0 | 21.709 | 0.336  | -2.335 |
| C      |     |   |   |        |        |        |
| HETATM | 97  | H | 0 | 21.362 | 1.060  | -2.842 |
| H      |     |   |   |        |        |        |
| HETATM | 98  | C | 0 | 23.065 | 0.210  | -2.176 |
| C      |     |   |   |        |        |        |
| HETATM | 99  | H | 0 | 23.647 | 0.847  | -2.574 |
| H      |     |   |   |        |        |        |
| HETATM | 100 | C | 0 | 23.604 | -0.856 | -1.427 |
| C      |     |   |   |        |        |        |
| HETATM | 101 | H | 0 | 24.545 | -0.934 | -1.321 |
| H      |     |   |   |        |        |        |
| HETATM | 102 | C | 0 | 22.774 | -1.774 | -0.853 |
| C      |     |   |   |        |        |        |
| HETATM | 103 | H | 0 | 23.143 | -2.490 | -0.350 |
| H      |     |   |   |        |        |        |
| HETATM | 104 | C | 0 | 21.363 | -1.673 | -1.000 |
| C      |     |   |   |        |        |        |
| HETATM | 105 | C | 0 | 20.484 | -2.611 | -0.429 |
| C      |     |   |   |        |        |        |
| HETATM | 106 | H | 0 | 20.838 | -3.331 | 0.081  |
| H      |     |   |   |        |        |        |
| HETATM | 107 | C | 0 | 13.783 | -3.699 | 2.662  |
| C      |     |   |   |        |        |        |
| HETATM | 108 | S | 0 | 10.288 | -6.301 | -0.530 |
| S      |     |   |   |        |        |        |
| HETATM | 109 | S | 0 | 15.680 | -8.202 | -3.441 |
| S      |     |   |   |        |        |        |
| HETATM | 110 | N | 0 | 13.689 | -4.294 | -1.084 |
| N      |     |   |   |        |        |        |
| HETATM | 111 | N | 0 | 12.712 | -6.297 | 0.248  |
| N      |     |   |   |        |        |        |
| HETATM | 112 | N | 0 | 12.141 | -7.360 | 0.896  |
| N      |     |   |   |        |        |        |

|        |     |   |   |        |         |        |
|--------|-----|---|---|--------|---------|--------|
| HETATM | 113 | N | 0 | 15.076 | -6.691  | -1.165 |
| N      |     |   |   |        |         |        |
| HETATM | 114 | C | 0 | 14.258 | -3.316  | -1.775 |
| C      |     |   |   |        |         |        |
| HETATM | 115 | H | 0 | 15.187 | -3.157  | -1.663 |
| H      |     |   |   |        |         |        |
| HETATM | 116 | C | 0 | 13.545 | -2.515  | -2.658 |
| C      |     |   |   |        |         |        |
| HETATM | 117 | H | 0 | 13.985 | -1.809  | -3.117 |
| H      |     |   |   |        |         |        |
| HETATM | 118 | C | 0 | 12.211 | -2.741  | -2.868 |
| C      |     |   |   |        |         |        |
| HETATM | 119 | H | 0 | 11.714 | -2.198  | -3.468 |
| H      |     |   |   |        |         |        |
| HETATM | 120 | C | 0 | 11.602 | -3.779  | -2.187 |
| C      |     |   |   |        |         |        |
| HETATM | 121 | H | 0 | 10.681 | -3.971  | -2.320 |
| H      |     |   |   |        |         |        |
| HETATM | 122 | C | 0 | 12.363 | -4.536  | -1.304 |
| C      |     |   |   |        |         |        |
| HETATM | 123 | C | 0 | 11.879 | -5.659  | -0.535 |
| C      |     |   |   |        |         |        |
| HETATM | 124 | C | 0 | 10.876 | -7.486  | 0.606  |
| C      |     |   |   |        |         |        |
| HETATM | 125 | C | 0 | 9.983  | -8.511  | 1.164  |
| C      |     |   |   |        |         |        |
| HETATM | 126 | C | 0 | 10.508 | -9.583  | 1.922  |
| C      |     |   |   |        |         |        |
| HETATM | 127 | H | 0 | 11.446 | -9.655  | 2.044  |
| H      |     |   |   |        |         |        |
| HETATM | 128 | C | 0 | 9.691  | -10.510 | 2.473  |
| C      |     |   |   |        |         |        |
| HETATM | 129 | H | 0 | 10.065 | -11.227 | 2.970  |
| H      |     |   |   |        |         |        |
| HETATM | 130 | C | 0 | 8.280  | -10.425 | 2.322  |
| C      |     |   |   |        |         |        |
| HETATM | 131 | C | 0 | 7.393  | -11.354 | 2.903  |
| C      |     |   |   |        |         |        |
| HETATM | 132 | H | 0 | 7.740  | -12.078 | 3.412  |
| H      |     |   |   |        |         |        |
| HETATM | 133 | C | 0 | 6.036  | -11.227 | 2.745  |
| C      |     |   |   |        |         |        |
| HETATM | 134 | H | 0 | 5.455  | -11.865 | 3.143  |
| H      |     |   |   |        |         |        |
| HETATM | 135 | C | 0 | 5.497  | -10.162 | 1.996  |
| C      |     |   |   |        |         |        |
| HETATM | 136 | H | 0 | 4.557  | -10.084 | 1.890  |
| H      |     |   |   |        |         |        |
| HETATM | 137 | C | 0 | 6.327  | -9.243  | 1.422  |
| C      |     |   |   |        |         |        |
| HETATM | 138 | H | 0 | 5.957  | -8.528  | 0.920  |
| H      |     |   |   |        |         |        |
| HETATM | 139 | C | 0 | 7.739  | -9.345  | 1.569  |
| C      |     |   |   |        |         |        |
| HETATM | 140 | C | 0 | 8.617  | -8.407  | 0.998  |
| C      |     |   |   |        |         |        |

|        |     |    |   |        |         |        |
|--------|-----|----|---|--------|---------|--------|
| HETATM | 141 | H  | 0 | 8.262  | -7.688  | 0.489  |
| H      |     |    |   |        |         |        |
| HETATM | 142 | C  | 0 | 15.317 | -7.319  | -2.093 |
| C      |     |    |   |        |         |        |
| HETATM | 143 | Fe | 0 | 10.721 | -17.258 | -0.187 |
| Fe     |     |    |   |        |         |        |
| HETATM | 144 | S  | 0 | 14.984 | -16.466 | 0.627  |
| S      |     |    |   |        |         |        |
| HETATM | 145 | S  | 0 | 9.592  | -14.565 | 3.539  |
| S      |     |    |   |        |         |        |
| HETATM | 146 | N  | 0 | 11.583 | -18.472 | 1.181  |
| N      |     |    |   |        |         |        |
| HETATM | 147 | N  | 0 | 12.560 | -16.469 | -0.151 |
| N      |     |    |   |        |         |        |
| HETATM | 148 | N  | 0 | 13.131 | -15.406 | -0.799 |
| N      |     |    |   |        |         |        |
| HETATM | 149 | N  | 0 | 10.195 | -16.075 | 1.263  |
| N      |     |    |   |        |         |        |
| HETATM | 150 | C  | 0 | 11.015 | -19.450 | 1.872  |
| C      |     |    |   |        |         |        |
| HETATM | 151 | H  | 0 | 10.084 | -19.610 | 1.760  |
| H      |     |    |   |        |         |        |
| HETATM | 152 | C  | 0 | 11.726 | -20.252 | 2.755  |
| C      |     |    |   |        |         |        |
| HETATM | 153 | H  | 0 | 11.287 | -20.958 | 3.215  |
| H      |     |    |   |        |         |        |
| HETATM | 154 | C  | 0 | 13.060 | -20.025 | 2.965  |
| C      |     |    |   |        |         |        |
| HETATM | 155 | H  | 0 | 13.556 | -20.570 | 3.565  |
| H      |     |    |   |        |         |        |
| HETATM | 156 | C  | 0 | 13.670 | -18.988 | 2.285  |
| C      |     |    |   |        |         |        |
| HETATM | 157 | H  | 0 | 14.591 | -18.795 | 2.417  |
| H      |     |    |   |        |         |        |
| HETATM | 158 | C  | 0 | 12.909 | -18.231 | 1.401  |
| C      |     |    |   |        |         |        |
| HETATM | 159 | C  | 0 | 13.392 | -17.109 | 0.632  |
| C      |     |    |   |        |         |        |
| HETATM | 160 | C  | 0 | 14.395 | -15.281 | -0.509 |
| C      |     |    |   |        |         |        |
| HETATM | 161 | C  | 0 | 15.289 | -14.255 | -1.067 |
| C      |     |    |   |        |         |        |
| HETATM | 162 | C  | 0 | 14.764 | -13.184 | -1.824 |
| C      |     |    |   |        |         |        |
| HETATM | 163 | H  | 0 | 13.825 | -13.112 | -1.947 |
| H      |     |    |   |        |         |        |
| HETATM | 164 | C  | 0 | 15.580 | -12.257 | -2.376 |
| C      |     |    |   |        |         |        |
| HETATM | 165 | H  | 0 | 15.206 | -11.539 | -2.873 |
| H      |     |    |   |        |         |        |
| HETATM | 166 | C  | 0 | 16.992 | -12.342 | -2.225 |
| C      |     |    |   |        |         |        |
| HETATM | 167 | C  | 0 | 17.879 | -11.413 | -2.806 |
| C      |     |    |   |        |         |        |
| HETATM | 168 | H  | 0 | 17.532 | -10.689 | -3.314 |
| H      |     |    |   |        |         |        |



|        |     |   |   |        |         |        |
|--------|-----|---|---|--------|---------|--------|
| HETATM | 169 | C | 0 | 19.236 | -11.539 | -2.648 |
| C      |     |   |   |        |         |        |
| HETATM | 170 | H | 0 | 19.817 | -10.902 | -3.046 |
| H      |     |   |   |        |         |        |
| HETATM | 171 | C | 0 | 19.774 | -12.605 | -1.898 |
| C      |     |   |   |        |         |        |
| HETATM | 172 | H | 0 | 20.715 | -12.683 | -1.793 |
| H      |     |   |   |        |         |        |
| HETATM | 173 | C | 0 | 18.944 | -13.523 | -1.325 |
| C      |     |   |   |        |         |        |
| HETATM | 174 | H | 0 | 19.314 | -14.238 | -0.822 |
| H      |     |   |   |        |         |        |
| HETATM | 175 | C | 0 | 17.532 | -13.421 | -1.471 |
| C      |     |   |   |        |         |        |
| HETATM | 176 | C | 0 | 16.655 | -14.360 | -0.902 |
| C      |     |   |   |        |         |        |
| HETATM | 177 | H | 0 | 17.009 | -15.078 | -0.392 |
| H      |     |   |   |        |         |        |
| HETATM | 178 | C | 0 | 9.954  | -15.448 | 2.191  |
| C      |     |   |   |        |         |        |
| HETATM | 179 | S | 0 | 6.458  | -18.049 | -1.001 |
| S      |     |   |   |        |         |        |
| HETATM | 180 | S | 0 | 11.851 | -19.950 | -3.914 |
| S      |     |   |   |        |         |        |
| HETATM | 181 | N | 0 | 9.859  | -16.043 | -1.555 |
| N      |     |   |   |        |         |        |
| HETATM | 182 | N | 0 | 8.882  | -18.046 | -0.223 |
| N      |     |   |   |        |         |        |
| HETATM | 183 | N | 0 | 8.311  | -19.109 | 0.425  |
| N      |     |   |   |        |         |        |
| HETATM | 184 | N | 0 | 11.246 | -18.440 | -1.637 |
| N      |     |   |   |        |         |        |
| HETATM | 185 | C | 0 | 10.428 | -15.065 | -2.247 |
| C      |     |   |   |        |         |        |
| HETATM | 186 | H | 0 | 11.358 | -14.906 | -2.134 |
| H      |     |   |   |        |         |        |
| HETATM | 187 | C | 0 | 9.716  | -14.263 | -3.129 |
| C      |     |   |   |        |         |        |
| HETATM | 188 | H | 0 | 10.156 | -13.558 | -3.589 |
| H      |     |   |   |        |         |        |
| HETATM | 189 | C | 0 | 8.382  | -14.490 | -3.340 |
| C      |     |   |   |        |         |        |
| HETATM | 190 | H | 0 | 7.885  | -13.946 | -3.940 |
| H      |     |   |   |        |         |        |
| HETATM | 191 | C | 0 | 7.773  | -15.527 | -2.659 |
| C      |     |   |   |        |         |        |
| HETATM | 192 | H | 0 | 6.851  | -15.720 | -2.791 |
| H      |     |   |   |        |         |        |
| HETATM | 193 | C | 0 | 8.534  | -16.284 | -1.776 |
| C      |     |   |   |        |         |        |
| HETATM | 194 | C | 0 | 8.050  | -17.407 | -1.007 |
| C      |     |   |   |        |         |        |
| HETATM | 195 | C | 0 | 7.047  | -19.234 | 0.135  |
| C      |     |   |   |        |         |        |
| HETATM | 196 | C | 0 | 6.153  | -20.260 | 0.692  |
| C      |     |   |   |        |         |        |

|        |     |    |   |        |         |        |
|--------|-----|----|---|--------|---------|--------|
| HETATM | 197 | C  | 0 | 6.679  | -21.332 | 1.449  |
| C      |     |    |   |        |         |        |
| HETATM | 198 | H  | 0 | 7.617  | -21.403 | 1.572  |
| H      |     |    |   |        |         |        |
| HETATM | 199 | C  | 0 | 5.862  | -22.258 | 2.002  |
| C      |     |    |   |        |         |        |
| HETATM | 200 | H  | 0 | 6.235  | -22.976 | 2.499  |
| H      |     |    |   |        |         |        |
| HETATM | 201 | C  | 0 | 4.451  | -22.174 | 1.850  |
| C      |     |    |   |        |         |        |
| HETATM | 202 | C  | 0 | 3.562  | -23.102 | 2.431  |
| C      |     |    |   |        |         |        |
| HETATM | 203 | H  | 0 | 3.910  | -23.826 | 2.939  |
| H      |     |    |   |        |         |        |
| HETATM | 204 | C  | 0 | 2.206  | -22.976 | 2.273  |
| C      |     |    |   |        |         |        |
| HETATM | 205 | H  | 0 | 1.624  | -23.613 | 2.672  |
| H      |     |    |   |        |         |        |
| HETATM | 206 | C  | 0 | 1.668  | -21.910 | 1.524  |
| C      |     |    |   |        |         |        |
| HETATM | 207 | H  | 0 | 0.728  | -21.832 | 1.419  |
| H      |     |    |   |        |         |        |
| HETATM | 208 | C  | 0 | 2.497  | -20.992 | 0.951  |
| C      |     |    |   |        |         |        |
| HETATM | 209 | H  | 0 | 2.128  | -20.276 | 0.447  |
| H      |     |    |   |        |         |        |
| HETATM | 210 | C  | 0 | 3.909  | -21.094 | 1.097  |
| C      |     |    |   |        |         |        |
| HETATM | 211 | C  | 0 | 4.787  | -20.156 | 0.527  |
| C      |     |    |   |        |         |        |
| HETATM | 212 | H  | 0 | 4.433  | -19.437 | 0.017  |
| H      |     |    |   |        |         |        |
| HETATM | 213 | C  | 0 | 11.488 | -19.067 | -2.565 |
| C      |     |    |   |        |         |        |
| HETATM | 214 | Fe | 0 | 11.105 | 8.994   | 0.614  |
| Fe     |     |    |   |        |         |        |
| HETATM | 215 | S  | 0 | 15.368 | 9.786   | 1.428  |
| S      |     |    |   |        |         |        |
| HETATM | 216 | S  | 0 | 9.975  | 11.687  | 4.340  |
| S      |     |    |   |        |         |        |
| HETATM | 217 | N  | 0 | 11.967 | 7.780   | 1.982  |
| N      |     |    |   |        |         |        |
| HETATM | 218 | N  | 0 | 12.943 | 9.782   | 0.650  |
| N      |     |    |   |        |         |        |
| HETATM | 219 | N  | 0 | 13.514 | 10.845  | 0.002  |
| N      |     |    |   |        |         |        |
| HETATM | 220 | N  | 0 | 10.580 | 10.177  | 2.063  |
| N      |     |    |   |        |         |        |
| HETATM | 221 | C  | 0 | 11.398 | 6.801   | 2.674  |
| C      |     |    |   |        |         |        |
| HETATM | 222 | H  | 0 | 10.468 | 6.642   | 2.561  |
| H      |     |    |   |        |         |        |
| HETATM | 223 | C  | 0 | 12.110 | 6.000   | 3.556  |
| C      |     |    |   |        |         |        |
| HETATM | 224 | H  | 0 | 11.670 | 5.295   | 4.015  |
| H      |     |    |   |        |         |        |

|        |     |   |   |        |        |        |
|--------|-----|---|---|--------|--------|--------|
| HETATM | 225 | C | 0 | 13.444 | 6.227  | 3.767  |
| C      |     |   |   |        |        |        |
| HETATM | 226 | H | 0 | 13.940 | 5.682  | 4.367  |
| H      |     |   |   |        |        |        |
| HETATM | 227 | C | 0 | 14.054 | 7.264  | 3.085  |
| C      |     |   |   |        |        |        |
| HETATM | 228 | H | 0 | 14.974 | 7.456  | 3.218  |
| H      |     |   |   |        |        |        |
| HETATM | 229 | C | 0 | 13.293 | 8.021  | 2.203  |
| C      |     |   |   |        |        |        |
| HETATM | 230 | C | 0 | 13.776 | 9.144  | 1.433  |
| C      |     |   |   |        |        |        |
| HETATM | 231 | C | 0 | 14.778 | 10.970 | 0.292  |
| C      |     |   |   |        |        |        |
| HETATM | 232 | C | 0 | 15.673 | 11.996 | -0.266 |
| C      |     |   |   |        |        |        |
| HETATM | 233 | C | 0 | 15.147 | 13.069 | -1.023 |
| C      |     |   |   |        |        |        |
| HETATM | 234 | H | 0 | 14.209 | 13.140 | -1.146 |
| H      |     |   |   |        |        |        |
| HETATM | 235 | C | 0 | 15.964 | 13.995 | -1.576 |
| C      |     |   |   |        |        |        |
| HETATM | 236 | H | 0 | 15.590 | 14.712 | -2.072 |
| H      |     |   |   |        |        |        |
| HETATM | 237 | C | 0 | 17.375 | 13.910 | -1.423 |
| C      |     |   |   |        |        |        |
| HETATM | 238 | C | 0 | 18.263 | 14.839 | -2.004 |
| C      |     |   |   |        |        |        |
| HETATM | 239 | H | 0 | 17.916 | 15.563 | -2.513 |
| H      |     |   |   |        |        |        |
| HETATM | 240 | C | 0 | 19.620 | 14.713 | -1.846 |
| C      |     |   |   |        |        |        |
| HETATM | 241 | H | 0 | 20.202 | 15.350 | -2.245 |
| H      |     |   |   |        |        |        |
| HETATM | 242 | C | 0 | 20.158 | 13.647 | -1.098 |
| C      |     |   |   |        |        |        |
| HETATM | 243 | H | 0 | 21.099 | 13.569 | -0.992 |
| H      |     |   |   |        |        |        |
| HETATM | 244 | C | 0 | 19.328 | 12.729 | -0.524 |
| C      |     |   |   |        |        |        |
| HETATM | 245 | H | 0 | 19.698 | 12.013 | -0.021 |
| H      |     |   |   |        |        |        |
| HETATM | 246 | C | 0 | 17.916 | 12.830 | -0.671 |
| C      |     |   |   |        |        |        |
| HETATM | 247 | C | 0 | 17.039 | 11.892 | -0.100 |
| C      |     |   |   |        |        |        |
| HETATM | 248 | H | 0 | 17.393 | 11.173 | 0.410  |
| H      |     |   |   |        |        |        |
| HETATM | 249 | C | 0 | 10.338 | 10.804 | 2.992  |
| C      |     |   |   |        |        |        |
| HETATM | 250 | S | 0 | 6.842  | 8.202  | -0.200 |
| S      |     |   |   |        |        |        |
| HETATM | 251 | S | 0 | 12.234 | 6.301  | -3.112 |
| S      |     |   |   |        |        |        |
| HETATM | 252 | N | 0 | 10.243 | 10.209 | -0.755 |
| N      |     |   |   |        |        |        |

|        |     |   |   |        |        |        |
|--------|-----|---|---|--------|--------|--------|
| HETATM | 253 | N | 0 | 9.267  | 8.206  | 0.577  |
| N      |     |   |   |        |        |        |
| HETATM | 254 | N | 0 | 8.695  | 7.143  | 1.225  |
| N      |     |   |   |        |        |        |
| HETATM | 255 | N | 0 | 11.630 | 7.812  | -0.835 |
| N      |     |   |   |        |        |        |
| HETATM | 256 | C | 0 | 10.811 | 11.187 | -1.445 |
| C      |     |   |   |        |        |        |
| HETATM | 257 | H | 0 | 11.742 | 11.346 | -1.332 |
| H      |     |   |   |        |        |        |
| HETATM | 258 | C | 0 | 10.100 | 11.988 | -2.328 |
| C      |     |   |   |        |        |        |
| HETATM | 259 | H | 0 | 10.539 | 12.693 | -2.788 |
| H      |     |   |   |        |        |        |
| HETATM | 260 | C | 0 | 8.766  | 11.761 | -2.539 |
| C      |     |   |   |        |        |        |
| HETATM | 261 | H | 0 | 8.269  | 12.306 | -3.139 |
| H      |     |   |   |        |        |        |
| HETATM | 262 | C | 0 | 8.156  | 10.724 | -1.858 |
| C      |     |   |   |        |        |        |
| HETATM | 263 | H | 0 | 7.235  | 10.532 | -1.991 |
| H      |     |   |   |        |        |        |
| HETATM | 264 | C | 0 | 8.917  | 9.967  | -0.974 |
| C      |     |   |   |        |        |        |
| HETATM | 265 | C | 0 | 8.434  | 8.845  | -0.205 |
| C      |     |   |   |        |        |        |
| HETATM | 266 | C | 0 | 7.431  | 7.017  | 0.937  |
| C      |     |   |   |        |        |        |
| HETATM | 267 | C | 0 | 6.537  | 5.992  | 1.494  |
| C      |     |   |   |        |        |        |
| HETATM | 268 | C | 0 | 7.063  | 4.920  | 2.251  |
| C      |     |   |   |        |        |        |
| HETATM | 269 | H | 0 | 8.001  | 4.848  | 2.374  |
| H      |     |   |   |        |        |        |
| HETATM | 270 | C | 0 | 6.245  | 3.993  | 2.803  |
| C      |     |   |   |        |        |        |
| HETATM | 271 | H | 0 | 6.620  | 3.276  | 3.300  |
| H      |     |   |   |        |        |        |
| HETATM | 272 | C | 0 | 4.835  | 4.079  | 2.651  |
| C      |     |   |   |        |        |        |
| HETATM | 273 | C | 0 | 3.946  | 3.149  | 3.233  |
| C      |     |   |   |        |        |        |
| HETATM | 274 | H | 0 | 4.294  | 2.426  | 3.741  |
| H      |     |   |   |        |        |        |
| HETATM | 275 | C | 0 | 2.590  | 3.276  | 3.075  |
| C      |     |   |   |        |        |        |
| HETATM | 276 | H | 0 | 2.008  | 2.639  | 3.473  |
| H      |     |   |   |        |        |        |
| HETATM | 277 | C | 0 | 2.052  | 4.341  | 2.325  |
| C      |     |   |   |        |        |        |
| HETATM | 278 | H | 0 | 1.110  | 4.419  | 2.219  |
| H      |     |   |   |        |        |        |
| HETATM | 279 | C | 0 | 2.881  | 5.259  | 1.751  |
| C      |     |   |   |        |        |        |
| HETATM | 280 | H | 0 | 2.512  | 5.975  | 1.249  |
| H      |     |   |   |        |        |        |

|        |     |    |   |        |        |        |
|--------|-----|----|---|--------|--------|--------|
| HETATM | 281 | C  | 0 | 4.293  | 5.158  | 1.898  |
| C      |     |    |   |        |        |        |
| HETATM | 282 | C  | 0 | 5.171  | 6.096  | 1.328  |
| C      |     |    |   |        |        |        |
| HETATM | 283 | H  | 0 | 4.817  | 6.815  | 0.818  |
| H      |     |    |   |        |        |        |
| HETATM | 284 | C  | 0 | 11.872 | 7.185  | -1.764 |
| C      |     |    |   |        |        |        |
| HETATM | 285 | Fe | 0 | 7.275  | -2.754 | 0.142  |
| Fe     |     |    |   |        |        |        |
| HETATM | 286 | S  | 0 | 11.538 | -1.962 | 0.956  |
| S      |     |    |   |        |        |        |
| HETATM | 287 | S  | 0 | 6.146  | -0.062 | 3.868  |
| S      |     |    |   |        |        |        |
| HETATM | 288 | N  | 0 | 8.137  | -3.969 | 1.511  |
| N      |     |    |   |        |        |        |
| HETATM | 289 | N  | 0 | 9.114  | -1.966 | 0.179  |
| N      |     |    |   |        |        |        |
| HETATM | 290 | N  | 0 | 9.685  | -0.903 | -0.469 |
| N      |     |    |   |        |        |        |
| HETATM | 291 | N  | 0 | 6.750  | -1.572 | 1.592  |
| N      |     |    |   |        |        |        |
| HETATM | 292 | C  | 0 | 7.568  | -4.947 | 2.201  |
| C      |     |    |   |        |        |        |
| HETATM | 293 | H  | 0 | 6.638  | -5.106 | 2.089  |
| H      |     |    |   |        |        |        |
| HETATM | 294 | C  | 0 | 8.281  | -5.748 | 3.084  |
| C      |     |    |   |        |        |        |
| HETATM | 295 | H  | 0 | 7.841  | -6.454 | 3.544  |
| H      |     |    |   |        |        |        |
| HETATM | 296 | C  | 0 | 9.615  | -5.522 | 3.295  |
| C      |     |    |   |        |        |        |
| HETATM | 297 | H  | 0 | 10.111 | -6.066 | 3.895  |
| H      |     |    |   |        |        |        |
| HETATM | 298 | C  | 0 | 10.224 | -4.485 | 2.614  |
| C      |     |    |   |        |        |        |
| HETATM | 299 | H  | 0 | 11.145 | -4.292 | 2.747  |
| H      |     |    |   |        |        |        |
| HETATM | 300 | C  | 0 | 9.463  | -3.727 | 1.730  |
| C      |     |    |   |        |        |        |
| HETATM | 301 | C  | 0 | 9.946  | -2.605 | 0.962  |
| C      |     |    |   |        |        |        |
| HETATM | 302 | C  | 0 | 10.949 | -0.778 | -0.180 |
| C      |     |    |   |        |        |        |
| HETATM | 303 | C  | 0 | 11.843 | 0.247  | -0.738 |
| C      |     |    |   |        |        |        |
| HETATM | 304 | C  | 0 | 11.318 | 1.320  | -1.494 |
| C      |     |    |   |        |        |        |
| HETATM | 305 | H  | 0 | 10.379 | 1.391  | -1.617 |
| H      |     |    |   |        |        |        |
| HETATM | 306 | C  | 0 | 12.135 | 2.246  | -2.047 |
| C      |     |    |   |        |        |        |
| HETATM | 307 | H  | 0 | 11.761 | 2.964  | -2.543 |
| H      |     |    |   |        |        |        |
| HETATM | 308 | C  | 0 | 13.545 | 2.161  | -1.895 |
| C      |     |    |   |        |        |        |

|        |     |   |   |        |        |        |
|--------|-----|---|---|--------|--------|--------|
| HETATM | 309 | C | 0 | 14.434 | 3.090  | -2.477 |
| C      |     |   |   |        |        |        |
| HETATM | 310 | H | 0 | 14.087 | 3.814  | -2.984 |
| H      |     |   |   |        |        |        |
| HETATM | 311 | C | 0 | 15.790 | 2.964  | -2.318 |
| C      |     |   |   |        |        |        |
| HETATM | 312 | H | 0 | 16.372 | 3.601  | -2.716 |
| H      |     |   |   |        |        |        |
| HETATM | 313 | C | 0 | 16.328 | 1.898  | -1.569 |
| C      |     |   |   |        |        |        |
| HETATM | 314 | H | 0 | 17.269 | 1.820  | -1.463 |
| H      |     |   |   |        |        |        |
| HETATM | 315 | C | 0 | 15.499 | 0.980  | -0.995 |
| C      |     |   |   |        |        |        |
| HETATM | 316 | H | 0 | 15.868 | 0.264  | -0.493 |
| H      |     |   |   |        |        |        |
| HETATM | 317 | C | 0 | 14.087 | 1.082  | -1.142 |
| C      |     |   |   |        |        |        |
| HETATM | 318 | C | 0 | 13.209 | 0.144  | -0.571 |
| C      |     |   |   |        |        |        |
| HETATM | 319 | H | 0 | 13.563 | -0.576 | -0.062 |
| H      |     |   |   |        |        |        |
| HETATM | 320 | C | 0 | 6.508  | -0.945 | 2.520  |
| C      |     |   |   |        |        |        |
| HETATM | 321 | S | 0 | 3.013  | -3.546 | -0.672 |
| S      |     |   |   |        |        |        |
| HETATM | 322 | S | 0 | 8.404  | -5.448 | -3.583 |
| S      |     |   |   |        |        |        |
| HETATM | 323 | N | 0 | 6.413  | -1.540 | -1.226 |
| N      |     |   |   |        |        |        |
| HETATM | 324 | N | 0 | 5.436  | -3.543 | 0.106  |
| N      |     |   |   |        |        |        |
| HETATM | 325 | N | 0 | 4.866  | -4.606 | 0.754  |
| N      |     |   |   |        |        |        |
| HETATM | 326 | N | 0 | 7.801  | -3.937 | -1.307 |
| N      |     |   |   |        |        |        |
| HETATM | 327 | C | 0 | 6.982  | -0.562 | -1.917 |
| C      |     |   |   |        |        |        |
| HETATM | 328 | H | 0 | 7.913  | -0.402 | -1.805 |
| H      |     |   |   |        |        |        |
| HETATM | 329 | C | 0 | 6.271  | 0.240  | -2.800 |
| C      |     |   |   |        |        |        |
| HETATM | 330 | H | 0 | 6.709  | 0.946  | -3.259 |
| H      |     |   |   |        |        |        |
| HETATM | 331 | C | 0 | 4.937  | 0.013  | -3.010 |
| C      |     |   |   |        |        |        |
| HETATM | 332 | H | 0 | 4.440  | 0.557  | -3.611 |
| H      |     |   |   |        |        |        |
| HETATM | 333 | C | 0 | 4.326  | -1.025 | -2.329 |
| C      |     |   |   |        |        |        |
| HETATM | 334 | H | 0 | 3.406  | -1.217 | -2.462 |
| H      |     |   |   |        |        |        |
| HETATM | 335 | C | 0 | 5.087  | -1.782 | -1.447 |
| C      |     |   |   |        |        |        |
| HETATM | 336 | C | 0 | 4.604  | -2.904 | -0.677 |
| C      |     |   |   |        |        |        |

|        |     |    |   |        |         |        |
|--------|-----|----|---|--------|---------|--------|
| HETATM | 337 | C  | 0 | 3.602  | -4.731  | 0.464  |
| C      |     |    |   |        |         |        |
| HETATM | 338 | C  | 0 | 2.708  | -5.757  | 1.022  |
| C      |     |    |   |        |         |        |
| HETATM | 339 | C  | 0 | 3.232  | -6.829  | 1.779  |
| C      |     |    |   |        |         |        |
| HETATM | 340 | H  | 0 | 4.171  | -6.901  | 1.902  |
| H      |     |    |   |        |         |        |
| HETATM | 341 | C  | 0 | 2.416  | -7.755  | 2.331  |
| C      |     |    |   |        |         |        |
| HETATM | 342 | H  | 0 | 2.790  | -8.473  | 2.828  |
| H      |     |    |   |        |         |        |
| HETATM | 343 | C  | 0 | 1.004  | -7.670  | 2.179  |
| C      |     |    |   |        |         |        |
| HETATM | 344 | C  | 0 | 0.117  | -8.599  | 2.761  |
| C      |     |    |   |        |         |        |
| HETATM | 345 | H  | 0 | 0.464  | -9.323  | 3.269  |
| H      |     |    |   |        |         |        |
| HETATM | 346 | C  | 0 | -1.239 | -8.473  | 2.602  |
| C      |     |    |   |        |         |        |
| HETATM | 347 | H  | 0 | -1.821 | -9.110  | 3.001  |
| H      |     |    |   |        |         |        |
| HETATM | 348 | C  | 0 | -1.778 | -7.408  | 1.854  |
| C      |     |    |   |        |         |        |
| HETATM | 349 | H  | 0 | -2.719 | -7.330  | 1.748  |
| H      |     |    |   |        |         |        |
| HETATM | 350 | C  | 0 | -0.948 | -6.489  | 1.280  |
| C      |     |    |   |        |         |        |
| HETATM | 351 | H  | 0 | -1.318 | -5.774  | 0.777  |
| H      |     |    |   |        |         |        |
| HETATM | 352 | C  | 0 | 0.464  | -6.591  | 1.427  |
| C      |     |    |   |        |         |        |
| HETATM | 353 | C  | 0 | 1.342  | -5.652  | 0.856  |
| C      |     |    |   |        |         |        |
| HETATM | 354 | H  | 0 | 0.988  | -4.933  | 0.346  |
| H      |     |    |   |        |         |        |
| HETATM | 355 | C  | 0 | 8.043  | -4.564  | -2.235 |
| C      |     |    |   |        |         |        |
| HETATM | 356 | Fe | 0 | 3.446  | -14.503 | -0.329 |
| Fe     |     |    |   |        |         |        |
| HETATM | 357 | S  | 0 | 7.709  | -13.711 | 0.484  |
| S      |     |    |   |        |         |        |
| HETATM | 358 | S  | 0 | 2.316  | -11.811 | 3.397  |
| S      |     |    |   |        |         |        |
| HETATM | 359 | N  | 0 | 4.308  | -15.718 | 1.039  |
| N      |     |    |   |        |         |        |
| HETATM | 360 | N  | 0 | 5.285  | -13.714 | -0.293 |
| N      |     |    |   |        |         |        |
| HETATM | 361 | N  | 0 | 5.856  | -12.652 | -0.942 |
| N      |     |    |   |        |         |        |
| HETATM | 362 | N  | 0 | 2.921  | -13.321 | 1.120  |
| N      |     |    |   |        |         |        |
| HETATM | 363 | C  | 0 | 3.739  | -16.696 | 1.730  |
| C      |     |    |   |        |         |        |
| HETATM | 364 | H  | 0 | 2.809  | -16.855 | 1.617  |
| H      |     |    |   |        |         |        |

|        |     |   |   |        |         |        |
|--------|-----|---|---|--------|---------|--------|
| HETATM | 365 | C | 0 | 4.451  | -17.497 | 2.612  |
| C      |     |   |   |        |         |        |
| HETATM | 366 | H | 0 | 4.011  | -18.203 | 3.073  |
| H      |     |   |   |        |         |        |
| HETATM | 367 | C | 0 | 5.785  | -17.271 | 2.823  |
| C      |     |   |   |        |         |        |
| HETATM | 368 | H | 0 | 6.282  | -17.815 | 3.423  |
| H      |     |   |   |        |         |        |
| HETATM | 369 | C | 0 | 6.395  | -16.233 | 2.142  |
| C      |     |   |   |        |         |        |
| HETATM | 370 | H | 0 | 7.316  | -16.041 | 2.274  |
| H      |     |   |   |        |         |        |
| HETATM | 371 | C | 0 | 5.633  | -15.476 | 1.259  |
| C      |     |   |   |        |         |        |
| HETATM | 372 | C | 0 | 6.117  | -14.354 | 0.490  |
| C      |     |   |   |        |         |        |
| HETATM | 373 | C | 0 | 7.120  | -12.526 | -0.652 |
| C      |     |   |   |        |         |        |
| HETATM | 374 | C | 0 | 8.013  | -11.501 | -1.209 |
| C      |     |   |   |        |         |        |
| HETATM | 375 | C | 0 | 7.489  | -10.429 | -1.966 |
| C      |     |   |   |        |         |        |
| HETATM | 376 | H | 0 | 6.550  | -10.358 | -2.089 |
| H      |     |   |   |        |         |        |
| HETATM | 377 | C | 0 | 8.305  | -9.503  | -2.518 |
| C      |     |   |   |        |         |        |
| HETATM | 378 | H | 0 | 7.932  | -8.785  | -3.016 |
| H      |     |   |   |        |         |        |
| HETATM | 379 | C | 0 | 9.716  | -9.587  | -2.367 |
| C      |     |   |   |        |         |        |
| HETATM | 380 | C | 0 | 10.604 | -8.658  | -2.948 |
| C      |     |   |   |        |         |        |
| HETATM | 381 | H | 0 | 10.257 | -7.935  | -3.456 |
| H      |     |   |   |        |         |        |
| HETATM | 382 | C | 0 | 11.960 | -8.785  | -2.790 |
| C      |     |   |   |        |         |        |
| HETATM | 383 | H | 0 | 12.542 | -8.147  | -3.189 |
| H      |     |   |   |        |         |        |
| HETATM | 384 | C | 0 | 12.499 | -9.851  | -2.040 |
| C      |     |   |   |        |         |        |
| HETATM | 385 | H | 0 | 13.440 | -9.929  | -1.936 |
| H      |     |   |   |        |         |        |
| HETATM | 386 | C | 0 | 11.670 | -10.769 | -1.467 |
| C      |     |   |   |        |         |        |
| HETATM | 387 | H | 0 | 12.039 | -11.484 | -0.964 |
| H      |     |   |   |        |         |        |
| HETATM | 388 | C | 0 | 10.258 | -10.667 | -1.613 |
| C      |     |   |   |        |         |        |
| HETATM | 389 | C | 0 | 9.379  | -11.605 | -1.044 |
| C      |     |   |   |        |         |        |
| HETATM | 390 | H | 0 | 9.734  | -12.324 | -0.534 |
| H      |     |   |   |        |         |        |
| HETATM | 391 | C | 0 | 2.679  | -12.694 | 2.049  |
| C      |     |   |   |        |         |        |
| HETATM | 392 | S | 0 | -0.817 | -15.295 | -1.143 |
| S      |     |   |   |        |         |        |



|        |     |   |   |        |         |        |
|--------|-----|---|---|--------|---------|--------|
| HETATM | 393 | S | 0 | 4.575  | -17.195 | -4.056 |
| S      |     |   |   |        |         |        |
| HETATM | 394 | N | 0 | 2.584  | -13.289 | -1.698 |
| N      |     |   |   |        |         |        |
| HETATM | 395 | N | 0 | 1.607  | -15.292 | -0.366 |
| N      |     |   |   |        |         |        |
| HETATM | 396 | N | 0 | 1.036  | -16.355 | 0.283  |
| N      |     |   |   |        |         |        |
| HETATM | 397 | N | 0 | 3.971  | -15.685 | -1.779 |
| N      |     |   |   |        |         |        |
| HETATM | 398 | C | 0 | 3.153  | -12.311 | -2.389 |
| C      |     |   |   |        |         |        |
| HETATM | 399 | H | 0 | 4.082  | -12.151 | -2.276 |
| H      |     |   |   |        |         |        |
| HETATM | 400 | C | 0 | 2.440  | -11.509 | -3.271 |
| C      |     |   |   |        |         |        |
| HETATM | 401 | H | 0 | 2.880  | -10.803 | -3.732 |
| H      |     |   |   |        |         |        |
| HETATM | 402 | C | 0 | 1.106  | -11.736 | -3.482 |
| C      |     |   |   |        |         |        |
| HETATM | 403 | H | 0 | 0.611  | -11.191 | -4.082 |
| H      |     |   |   |        |         |        |
| HETATM | 404 | C | 0 | 0.497  | -12.772 | -2.801 |
| C      |     |   |   |        |         |        |
| HETATM | 405 | H | 0 | -0.424 | -12.966 | -2.933 |
| H      |     |   |   |        |         |        |
| HETATM | 406 | C | 0 | 1.258  | -13.530 | -1.918 |
| C      |     |   |   |        |         |        |
| HETATM | 407 | C | 0 | 0.775  | -14.652 | -1.149 |
| C      |     |   |   |        |         |        |
| HETATM | 408 | C | 0 | -0.227 | -16.479 | -0.007 |
| C      |     |   |   |        |         |        |
| HETATM | 409 | C | 0 | -1.122 | -17.506 | 0.550  |
| C      |     |   |   |        |         |        |
| HETATM | 410 | C | 0 | -0.597 | -18.577 | 1.307  |
| C      |     |   |   |        |         |        |
| HETATM | 411 | H | 0 | 0.342  | -18.648 | 1.430  |
| H      |     |   |   |        |         |        |
| HETATM | 412 | C | 0 | -1.414 | -19.503 | 1.860  |
| C      |     |   |   |        |         |        |
| HETATM | 413 | H | 0 | -1.039 | -20.222 | 2.357  |
| H      |     |   |   |        |         |        |
| HETATM | 414 | C | 0 | -2.825 | -19.419 | 1.708  |
| C      |     |   |   |        |         |        |
| HETATM | 415 | C | 0 | -3.712 | -20.348 | 2.289  |
| C      |     |   |   |        |         |        |
| HETATM | 416 | H | 0 | -3.365 | -21.072 | 2.797  |
| H      |     |   |   |        |         |        |
| HETATM | 417 | C | 0 | -5.069 | -20.222 | 2.131  |
| C      |     |   |   |        |         |        |
| HETATM | 418 | H | 0 | -5.650 | -20.859 | 2.530  |
| H      |     |   |   |        |         |        |
| HETATM | 419 | C | 0 | -5.608 | -19.156 | 1.381  |
| C      |     |   |   |        |         |        |
| HETATM | 420 | H | 0 | -6.548 | -19.078 | 1.277  |
| H      |     |   |   |        |         |        |

|        |     |    |   |        |         |        |
|--------|-----|----|---|--------|---------|--------|
| HETATM | 421 | C  | 0 | -4.777 | -18.238 | 0.808  |
| C      |     |    |   |        |         |        |
| HETATM | 422 | H  | 0 | -5.147 | -17.522 | 0.305  |
| H      |     |    |   |        |         |        |
| HETATM | 423 | C  | 0 | -3.366 | -18.339 | 0.954  |
| C      |     |    |   |        |         |        |
| HETATM | 424 | C  | 0 | -2.488 | -17.401 | 0.385  |
| C      |     |    |   |        |         |        |
| HETATM | 425 | H  | 0 | -2.842 | -16.682 | -0.125 |
| H      |     |    |   |        |         |        |
| HETATM | 426 | C  | 0 | 4.213  | -16.313 | -2.708 |
| C      |     |    |   |        |         |        |
| HETATM | 427 | Fe | 0 | 3.830  | 11.749  | 0.472  |
| Fe     |     |    |   |        |         |        |
| HETATM | 428 | S  | 0 | 8.092  | 12.541  | 1.286  |
| S      |     |    |   |        |         |        |
| HETATM | 429 | S  | 0 | 2.700  | 14.441  | 4.197  |
| S      |     |    |   |        |         |        |
| HETATM | 430 | N  | 0 | 4.692  | 10.534  | 1.840  |
| N      |     |    |   |        |         |        |
| HETATM | 431 | N  | 0 | 5.668  | 12.537  | 0.508  |
| N      |     |    |   |        |         |        |
| HETATM | 432 | N  | 0 | 6.239  | 13.599  | -0.140 |
| N      |     |    |   |        |         |        |
| HETATM | 433 | N  | 0 | 3.305  | 12.931  | 1.921  |
| N      |     |    |   |        |         |        |
| HETATM | 434 | C  | 0 | 4.123  | 9.555   | 2.531  |
| C      |     |    |   |        |         |        |
| HETATM | 435 | H  | 0 | 3.193  | 9.397   | 2.419  |
| H      |     |    |   |        |         |        |
| HETATM | 436 | C  | 0 | 4.835  | 8.755   | 3.414  |
| C      |     |    |   |        |         |        |
| HETATM | 437 | H  | 0 | 4.395  | 8.049   | 3.873  |
| H      |     |    |   |        |         |        |
| HETATM | 438 | C  | 0 | 6.169  | 8.981   | 3.625  |
| C      |     |    |   |        |         |        |
| HETATM | 439 | H  | 0 | 6.665  | 8.437   | 4.224  |
| H      |     |    |   |        |         |        |
| HETATM | 440 | C  | 0 | 6.778  | 10.018  | 2.943  |
| C      |     |    |   |        |         |        |
| HETATM | 441 | H  | 0 | 7.699  | 10.210  | 3.076  |
| H      |     |    |   |        |         |        |
| HETATM | 442 | C  | 0 | 6.017  | 10.776  | 2.060  |
| C      |     |    |   |        |         |        |
| HETATM | 443 | C  | 0 | 6.501  | 11.898  | 1.291  |
| C      |     |    |   |        |         |        |
| HETATM | 444 | C  | 0 | 7.503  | 13.725  | 0.150  |
| C      |     |    |   |        |         |        |
| HETATM | 445 | C  | 0 | 8.397  | 14.750  | -0.408 |
| C      |     |    |   |        |         |        |
| HETATM | 446 | C  | 0 | 7.873  | 15.823  | -1.165 |
| C      |     |    |   |        |         |        |
| HETATM | 447 | H  | 0 | 6.933  | 15.894  | -1.288 |
| H      |     |    |   |        |         |        |
| HETATM | 448 | C  | 0 | 8.689  | 16.749  | -1.718 |
| C      |     |    |   |        |         |        |

|        |     |   |   |        |        |        |
|--------|-----|---|---|--------|--------|--------|
| HETATM | 449 | H | 0 | 8.314  | 17.467 | -2.214 |
| H      |     |   |   |        |        |        |
| HETATM | 450 | C | 0 | 10.100 | 16.664 | -1.566 |
| C      |     |   |   |        |        |        |
| HETATM | 451 | C | 0 | 10.988 | 17.594 | -2.147 |
| C      |     |   |   |        |        |        |
| HETATM | 452 | H | 0 | 10.641 | 18.318 | -2.655 |
| H      |     |   |   |        |        |        |
| HETATM | 453 | C | 0 | 12.344 | 17.467 | -1.988 |
| C      |     |   |   |        |        |        |
| HETATM | 454 | H | 0 | 12.926 | 18.105 | -2.387 |
| H      |     |   |   |        |        |        |
| HETATM | 455 | C | 0 | 12.883 | 16.401 | -1.240 |
| C      |     |   |   |        |        |        |
| HETATM | 456 | H | 0 | 13.824 | 16.323 | -1.134 |
| H      |     |   |   |        |        |        |
| HETATM | 457 | C | 0 | 12.053 | 15.484 | -0.666 |
| C      |     |   |   |        |        |        |
| HETATM | 458 | H | 0 | 12.422 | 14.768 | -0.163 |
| H      |     |   |   |        |        |        |
| HETATM | 459 | C | 0 | 10.641 | 15.584 | -0.813 |
| C      |     |   |   |        |        |        |
| HETATM | 460 | C | 0 | 9.763  | 14.647 | -0.242 |
| C      |     |   |   |        |        |        |
| HETATM | 461 | H | 0 | 10.117 | 13.927 | 0.267  |
| H      |     |   |   |        |        |        |
| HETATM | 462 | C | 0 | 3.062  | 13.559 | 2.849  |
| C      |     |   |   |        |        |        |
| HETATM | 463 | S | 0 | -0.433 | 10.956 | -0.342 |
| S      |     |   |   |        |        |        |
| HETATM | 464 | S | 0 | 4.959  | 9.056  | -3.254 |
| S      |     |   |   |        |        |        |
| HETATM | 465 | N | 0 | 2.968  | 12.964 | -0.897 |
| N      |     |   |   |        |        |        |
| HETATM | 466 | N | 0 | 1.991  | 10.960 | 0.435  |
| N      |     |   |   |        |        |        |
| HETATM | 467 | N | 0 | 1.420  | 9.898  | 1.083  |
| N      |     |   |   |        |        |        |
| HETATM | 468 | N | 0 | 4.355  | 10.567 | -0.978 |
| N      |     |   |   |        |        |        |
| HETATM | 469 | C | 0 | 3.537  | 13.942 | -1.587 |
| C      |     |   |   |        |        |        |
| HETATM | 470 | H | 0 | 4.466  | 14.101 | -1.475 |
| H      |     |   |   |        |        |        |
| HETATM | 471 | C | 0 | 2.824  | 14.742 | -2.470 |
| C      |     |   |   |        |        |        |
| HETATM | 472 | H | 0 | 3.264  | 15.448 | -2.930 |
| H      |     |   |   |        |        |        |
| HETATM | 473 | C | 0 | 1.490  | 14.516 | -2.681 |
| C      |     |   |   |        |        |        |
| HETATM | 474 | H | 0 | 0.993  | 15.060 | -3.281 |
| H      |     |   |   |        |        |        |
| HETATM | 475 | C | 0 | 0.881  | 13.479 | -2.000 |
| C      |     |   |   |        |        |        |
| HETATM | 476 | H | 0 | -0.041 | 13.287 | -2.133 |
| H      |     |   |   |        |        |        |

|        |     |    |   |        |        |        |
|--------|-----|----|---|--------|--------|--------|
| HETATM | 477 | C  | 0 | 1.642  | 12.721 | -1.116 |
| C      |     |    |   |        |        |        |
| HETATM | 478 | C  | 0 | 1.158  | 11.599 | -0.348 |
| C      |     |    |   |        |        |        |
| HETATM | 479 | C  | 0 | 0.155  | 9.772  | 0.794  |
| C      |     |    |   |        |        |        |
| HETATM | 480 | C  | 0 | -0.738 | 8.747  | 1.352  |
| C      |     |    |   |        |        |        |
| HETATM | 481 | C  | 0 | -0.213 | 7.675  | 2.109  |
| C      |     |    |   |        |        |        |
| HETATM | 482 | H  | 0 | 0.725  | 7.603  | 2.231  |
| H      |     |    |   |        |        |        |
| HETATM | 483 | C  | 0 | -1.030 | 6.748  | 2.661  |
| C      |     |    |   |        |        |        |
| HETATM | 484 | H  | 0 | -0.656 | 6.030  | 3.157  |
| H      |     |    |   |        |        |        |
| HETATM | 485 | C  | 0 | -2.441 | 6.833  | 2.509  |
| C      |     |    |   |        |        |        |
| HETATM | 486 | C  | 0 | -3.329 | 5.903  | 3.091  |
| C      |     |    |   |        |        |        |
| HETATM | 487 | H  | 0 | -2.981 | 5.180  | 3.599  |
| H      |     |    |   |        |        |        |
| HETATM | 488 | C  | 0 | -4.685 | 6.030  | 2.932  |
| C      |     |    |   |        |        |        |
| HETATM | 489 | H  | 0 | -5.266 | 5.393  | 3.330  |
| H      |     |    |   |        |        |        |
| HETATM | 490 | C  | 0 | -5.224 | 7.096  | 2.183  |
| C      |     |    |   |        |        |        |
| HETATM | 491 | H  | 0 | -6.164 | 7.174  | 2.077  |
| H      |     |    |   |        |        |        |
| HETATM | 492 | C  | 0 | -4.394 | 8.014  | 1.609  |
| C      |     |    |   |        |        |        |
| HETATM | 493 | H  | 0 | -4.764 | 8.730  | 1.107  |
| H      |     |    |   |        |        |        |
| HETATM | 494 | C  | 0 | -2.982 | 7.913  | 1.756  |
| C      |     |    |   |        |        |        |
| HETATM | 495 | C  | 0 | -2.104 | 8.850  | 1.185  |
| C      |     |    |   |        |        |        |
| HETATM | 496 | H  | 0 | -2.459 | 9.570  | 0.676  |
| H      |     |    |   |        |        |        |
| HETATM | 497 | C  | 0 | 4.596  | 9.939  | -1.906 |
| C      |     |    |   |        |        |        |
| HETATM | 498 | Fe | 0 | 0.000  | 0.000  | 0.000  |
| Fe     |     |    |   |        |        |        |
| HETATM | 499 | S  | 0 | 4.334  | 0.821  | 0.853  |
| S      |     |    |   |        |        |        |
| HETATM | 500 | S  | 0 | -1.105 | 2.822  | 3.779  |
| S      |     |    |   |        |        |        |
| HETATM | 501 | N  | 0 | 0.869  | -1.278 | 1.305  |
| N      |     |    |   |        |        |        |
| HETATM | 502 | N  | 0 | 1.844  | 0.825  | 0.049  |
| N      |     |    |   |        |        |        |
| HETATM | 503 | N  | 0 | 2.426  | 1.914  | -0.610 |
| N      |     |    |   |        |        |        |
| HETATM | 504 | N  | 0 | -0.520 | 1.137  | 1.498  |
| N      |     |    |   |        |        |        |

|        |     |   |   |        |        |        |
|--------|-----|---|---|--------|--------|--------|
| HETATM | 505 | C | 0 | 0.290  | -2.340 | 1.920  |
| C      |     |   |   |        |        |        |
| HETATM | 506 | H | 0 | -0.752 | -2.523 | 1.664  |
| H      |     |   |   |        |        |        |
| HETATM | 507 | C | 0 | 0.997  | -3.148 | 2.843  |
| C      |     |   |   |        |        |        |
| HETATM | 508 | H | 0 | 0.492  | -3.991 | 3.311  |
| H      |     |   |   |        |        |        |
| HETATM | 509 | C | 0 | 2.344  | -2.845 | 3.143  |
| C      |     |   |   |        |        |        |
| HETATM | 510 | H | 0 | 2.910  | -3.449 | 3.852  |
| H      |     |   |   |        |        |        |
| HETATM | 511 | C | 0 | 2.953  | -1.738 | 2.508  |
| C      |     |   |   |        |        |        |
| HETATM | 512 | H | 0 | 3.978  | -1.451 | 2.738  |
| H      |     |   |   |        |        |        |
| HETATM | 513 | C | 0 | 2.179  | -0.992 | 1.594  |
| C      |     |   |   |        |        |        |
| HETATM | 514 | C | 0 | 2.680  | 0.168  | 0.847  |
| C      |     |   |   |        |        |        |
| HETATM | 515 | C | 0 | 3.712  | 2.062  | -0.316 |
| C      |     |   |   |        |        |        |
| HETATM | 516 | C | 0 | 4.605  | 3.096  | -0.873 |
| C      |     |   |   |        |        |        |
| HETATM | 517 | C | 0 | 4.061  | 4.199  | -1.632 |
| C      |     |   |   |        |        |        |
| HETATM | 518 | H | 0 | 2.982  | 4.268  | -1.766 |
| H      |     |   |   |        |        |        |
| HETATM | 519 | C | 0 | 4.915  | 5.149  | -2.186 |
| C      |     |   |   |        |        |        |
| HETATM | 520 | H | 0 | 4.519  | 5.989  | -2.760 |
| H      |     |   |   |        |        |        |
| HETATM | 521 | C | 0 | 6.348  | 5.036  | -2.032 |
| C      |     |   |   |        |        |        |
| HETATM | 522 | C | 0 | 7.258  | 5.982  | -2.626 |
| C      |     |   |   |        |        |        |
| HETATM | 523 | H | 0 | 6.847  | 6.810  | -3.205 |
| H      |     |   |   |        |        |        |
| HETATM | 524 | C | 0 | 8.637  | 5.847  | -2.444 |
| C      |     |   |   |        |        |        |
| HETATM | 525 | H | 0 | 9.330  | 6.550  | -2.908 |
| H      |     |   |   |        |        |        |
| HETATM | 526 | C | 0 | 9.171  | 4.762  | -1.662 |
| C      |     |   |   |        |        |        |
| HETATM | 527 | H | 0 | 10.253 | 4.683  | -1.548 |
| H      |     |   |   |        |        |        |
| HETATM | 528 | C | 0 | 8.315  | 3.826  | -1.082 |
| C      |     |   |   |        |        |        |
| HETATM | 529 | H | 0 | 8.706  | 2.986  | -0.507 |
| H      |     |   |   |        |        |        |
| HETATM | 530 | C | 0 | 6.888  | 3.944  | -1.254 |
| C      |     |   |   |        |        |        |
| HETATM | 531 | C | 0 | 5.988  | 2.993  | -0.677 |
| C      |     |   |   |        |        |        |
| HETATM | 532 | H | 0 | 6.413  | 2.176  | -0.090 |
| H      |     |   |   |        |        |        |

|        |     |   |   |        |        |        |
|--------|-----|---|---|--------|--------|--------|
| HETATM | 533 | C | 0 | -0.745 | 1.826  | 2.438  |
| C      |     |   |   |        |        |        |
| HETATM | 534 | S | 0 | -4.334 | -0.820 | -0.854 |
| S      |     |   |   |        |        |        |
| HETATM | 535 | S | 0 | 1.104  | -2.822 | -3.779 |
| S      |     |   |   |        |        |        |
| HETATM | 536 | N | 0 | -0.869 | 1.279  | -1.305 |
| N      |     |   |   |        |        |        |
| HETATM | 537 | N | 0 | -1.844 | -0.824 | -0.049 |
| N      |     |   |   |        |        |        |
| HETATM | 538 | N | 0 | -2.426 | -1.914 | 0.610  |
| N      |     |   |   |        |        |        |
| HETATM | 539 | N | 0 | 0.520  | -1.136 | -1.498 |
| N      |     |   |   |        |        |        |
| HETATM | 540 | C | 0 | -0.290 | 2.341  | -1.920 |
| C      |     |   |   |        |        |        |
| HETATM | 541 | H | 0 | 0.751  | 2.524  | -1.664 |
| H      |     |   |   |        |        |        |
| HETATM | 542 | C | 0 | -0.998 | 3.148  | -2.843 |
| C      |     |   |   |        |        |        |
| HETATM | 543 | H | 0 | -0.492 | 3.992  | -3.311 |
| H      |     |   |   |        |        |        |
| HETATM | 544 | C | 0 | -2.344 | 2.845  | -3.143 |
| C      |     |   |   |        |        |        |
| HETATM | 545 | H | 0 | -2.910 | 3.449  | -3.852 |
| H      |     |   |   |        |        |        |
| HETATM | 546 | C | 0 | -2.953 | 1.737  | -2.508 |
| C      |     |   |   |        |        |        |
| HETATM | 547 | H | 0 | -3.977 | 1.450  | -2.739 |
| H      |     |   |   |        |        |        |
| HETATM | 548 | C | 0 | -2.178 | 0.992  | -1.594 |
| C      |     |   |   |        |        |        |
| HETATM | 549 | C | 0 | -2.680 | -0.168 | -0.847 |
| C      |     |   |   |        |        |        |
| HETATM | 550 | C | 0 | -3.711 | -2.061 | 0.316  |
| C      |     |   |   |        |        |        |
| HETATM | 551 | C | 0 | -4.605 | -3.096 | 0.873  |
| C      |     |   |   |        |        |        |
| HETATM | 552 | C | 0 | -4.061 | -4.198 | 1.632  |
| C      |     |   |   |        |        |        |
| HETATM | 553 | H | 0 | -2.982 | -4.268 | 1.767  |
| H      |     |   |   |        |        |        |
| HETATM | 554 | C | 0 | -4.916 | -5.148 | 2.185  |
| C      |     |   |   |        |        |        |
| HETATM | 555 | H | 0 | -4.520 | -5.988 | 2.760  |
| H      |     |   |   |        |        |        |
| HETATM | 556 | C | 0 | -6.348 | -5.035 | 2.031  |
| C      |     |   |   |        |        |        |
| HETATM | 557 | C | 0 | -7.258 | -5.981 | 2.626  |
| C      |     |   |   |        |        |        |
| HETATM | 558 | H | 0 | -6.849 | -6.809 | 3.204  |
| H      |     |   |   |        |        |        |
| HETATM | 559 | C | 0 | -8.637 | -5.846 | 2.443  |
| C      |     |   |   |        |        |        |
| HETATM | 560 | H | 0 | -9.331 | -6.549 | 2.906  |
| H      |     |   |   |        |        |        |

|        |     |    |   |         |         |        |
|--------|-----|----|---|---------|---------|--------|
| HETATM | 561 | C  | 0 | -9.171  | -4.761  | 1.660  |
| C      |     |    |   |         |         |        |
| HETATM | 562 | H  | 0 | -10.253 | -4.682  | 1.546  |
| H      |     |    |   |         |         |        |
| HETATM | 563 | C  | 0 | -8.315  | -3.825  | 1.081  |
| C      |     |    |   |         |         |        |
| HETATM | 564 | H  | 0 | -8.706  | -2.984  | 0.505  |
| H      |     |    |   |         |         |        |
| HETATM | 565 | C  | 0 | -6.888  | -3.943  | 1.254  |
| C      |     |    |   |         |         |        |
| HETATM | 566 | C  | 0 | -5.988  | -2.992  | 0.676  |
| C      |     |    |   |         |         |        |
| HETATM | 567 | H  | 0 | -6.413  | -2.175  | 0.090  |
| H      |     |    |   |         |         |        |
| HETATM | 568 | C  | 0 | 0.745   | -1.826  | -2.438 |
| C      |     |    |   |         |         |        |
| HETATM | 569 | Fe | 0 | -3.830  | -11.749 | -0.472 |
| Fe     |     |    |   |         |         |        |
| HETATM | 570 | S  | 0 | 0.433   | -10.956 | 0.342  |
| S      |     |    |   |         |         |        |
| HETATM | 571 | S  | 0 | -4.959  | -9.056  | 3.254  |
| S      |     |    |   |         |         |        |
| HETATM | 572 | N  | 0 | -2.968  | -12.964 | 0.897  |
| N      |     |    |   |         |         |        |
| HETATM | 573 | N  | 0 | -1.991  | -10.960 | -0.435 |
| N      |     |    |   |         |         |        |
| HETATM | 574 | N  | 0 | -1.420  | -9.898  | -1.083 |
| N      |     |    |   |         |         |        |
| HETATM | 575 | N  | 0 | -4.355  | -10.567 | 0.978  |
| N      |     |    |   |         |         |        |
| HETATM | 576 | C  | 0 | -3.537  | -13.942 | 1.587  |
| C      |     |    |   |         |         |        |
| HETATM | 577 | H  | 0 | -4.466  | -14.101 | 1.475  |
| H      |     |    |   |         |         |        |
| HETATM | 578 | C  | 0 | -2.824  | -14.742 | 2.470  |
| C      |     |    |   |         |         |        |
| HETATM | 579 | H  | 0 | -3.264  | -15.448 | 2.930  |
| H      |     |    |   |         |         |        |
| HETATM | 580 | C  | 0 | -1.490  | -14.516 | 2.681  |
| C      |     |    |   |         |         |        |
| HETATM | 581 | H  | 0 | -0.993  | -15.060 | 3.281  |
| H      |     |    |   |         |         |        |
| HETATM | 582 | C  | 0 | -0.881  | -13.479 | 2.000  |
| C      |     |    |   |         |         |        |
| HETATM | 583 | H  | 0 | 0.041   | -13.287 | 2.133  |
| H      |     |    |   |         |         |        |
| HETATM | 584 | C  | 0 | -1.642  | -12.721 | 1.116  |
| C      |     |    |   |         |         |        |
| HETATM | 585 | C  | 0 | -1.158  | -11.599 | 0.348  |
| C      |     |    |   |         |         |        |
| HETATM | 586 | C  | 0 | -0.155  | -9.772  | -0.794 |
| C      |     |    |   |         |         |        |
| HETATM | 587 | C  | 0 | 0.738   | -8.747  | -1.352 |
| C      |     |    |   |         |         |        |
| HETATM | 588 | C  | 0 | 0.213   | -7.675  | -2.108 |
| C      |     |    |   |         |         |        |

|        |     |   |   |        |         |        |
|--------|-----|---|---|--------|---------|--------|
| HETATM | 589 | H | 0 | -0.725 | -7.603  | -2.231 |
| H      |     |   |   |        |         |        |
| HETATM | 590 | C | 0 | 1.030  | -6.748  | -2.661 |
| C      |     |   |   |        |         |        |
| HETATM | 591 | H | 0 | 0.656  | -6.030  | -3.157 |
| H      |     |   |   |        |         |        |
| HETATM | 592 | C | 0 | 2.441  | -6.833  | -2.509 |
| C      |     |   |   |        |         |        |
| HETATM | 593 | C | 0 | 3.329  | -5.903  | -3.091 |
| C      |     |   |   |        |         |        |
| HETATM | 594 | H | 0 | 2.981  | -5.180  | -3.599 |
| H      |     |   |   |        |         |        |
| HETATM | 595 | C | 0 | 4.685  | -6.030  | -2.932 |
| C      |     |   |   |        |         |        |
| HETATM | 596 | H | 0 | 5.266  | -5.393  | -3.330 |
| H      |     |   |   |        |         |        |
| HETATM | 597 | C | 0 | 5.224  | -7.096  | -2.183 |
| C      |     |   |   |        |         |        |
| HETATM | 598 | H | 0 | 6.164  | -7.174  | -2.077 |
| H      |     |   |   |        |         |        |
| HETATM | 599 | C | 0 | 4.394  | -8.014  | -1.609 |
| C      |     |   |   |        |         |        |
| HETATM | 600 | H | 0 | 4.764  | -8.730  | -1.107 |
| H      |     |   |   |        |         |        |
| HETATM | 601 | C | 0 | 2.982  | -7.913  | -1.756 |
| C      |     |   |   |        |         |        |
| HETATM | 602 | C | 0 | 2.104  | -8.850  | -1.185 |
| C      |     |   |   |        |         |        |
| HETATM | 603 | H | 0 | 2.459  | -9.570  | -0.676 |
| H      |     |   |   |        |         |        |
| HETATM | 604 | C | 0 | -4.596 | -9.939  | 1.906  |
| C      |     |   |   |        |         |        |
| HETATM | 605 | S | 0 | -8.092 | -12.541 | -1.286 |
| S      |     |   |   |        |         |        |
| HETATM | 606 | S | 0 | -2.700 | -14.441 | -4.197 |
| S      |     |   |   |        |         |        |
| HETATM | 607 | N | 0 | -4.692 | -10.534 | -1.840 |
| N      |     |   |   |        |         |        |
| HETATM | 608 | N | 0 | -5.668 | -12.537 | -0.508 |
| N      |     |   |   |        |         |        |
| HETATM | 609 | N | 0 | -6.239 | -13.599 | 0.140  |
| N      |     |   |   |        |         |        |
| HETATM | 610 | N | 0 | -3.305 | -12.931 | -1.921 |
| N      |     |   |   |        |         |        |
| HETATM | 611 | C | 0 | -4.123 | -9.555  | -2.531 |
| C      |     |   |   |        |         |        |
| HETATM | 612 | H | 0 | -3.193 | -9.397  | -2.419 |
| H      |     |   |   |        |         |        |
| HETATM | 613 | C | 0 | -4.835 | -8.755  | -3.414 |
| C      |     |   |   |        |         |        |
| HETATM | 614 | H | 0 | -4.395 | -8.049  | -3.873 |
| H      |     |   |   |        |         |        |
| HETATM | 615 | C | 0 | -6.169 | -8.981  | -3.625 |
| C      |     |   |   |        |         |        |
| HETATM | 616 | H | 0 | -6.665 | -8.437  | -4.224 |
| H      |     |   |   |        |         |        |



|        |     |    |   |         |         |        |
|--------|-----|----|---|---------|---------|--------|
| HETATM | 617 | C  | 0 | -6.778  | -10.018 | -2.943 |
| C      |     |    |   |         |         |        |
| HETATM | 618 | H  | 0 | -7.699  | -10.210 | -3.076 |
| H      |     |    |   |         |         |        |
| HETATM | 619 | C  | 0 | -6.017  | -10.776 | -2.060 |
| C      |     |    |   |         |         |        |
| HETATM | 620 | C  | 0 | -6.501  | -11.898 | -1.291 |
| C      |     |    |   |         |         |        |
| HETATM | 621 | C  | 0 | -7.503  | -13.725 | -0.150 |
| C      |     |    |   |         |         |        |
| HETATM | 622 | C  | 0 | -8.397  | -14.750 | 0.408  |
| C      |     |    |   |         |         |        |
| HETATM | 623 | C  | 0 | -7.873  | -15.823 | 1.165  |
| C      |     |    |   |         |         |        |
| HETATM | 624 | H  | 0 | -6.933  | -15.894 | 1.288  |
| H      |     |    |   |         |         |        |
| HETATM | 625 | C  | 0 | -8.689  | -16.749 | 1.718  |
| C      |     |    |   |         |         |        |
| HETATM | 626 | H  | 0 | -8.314  | -17.467 | 2.214  |
| H      |     |    |   |         |         |        |
| HETATM | 627 | C  | 0 | -10.100 | -16.664 | 1.566  |
| C      |     |    |   |         |         |        |
| HETATM | 628 | C  | 0 | -10.988 | -17.594 | 2.147  |
| C      |     |    |   |         |         |        |
| HETATM | 629 | H  | 0 | -10.641 | -18.318 | 2.655  |
| H      |     |    |   |         |         |        |
| HETATM | 630 | C  | 0 | -12.344 | -17.468 | 1.988  |
| C      |     |    |   |         |         |        |
| HETATM | 631 | H  | 0 | -12.926 | -18.105 | 2.387  |
| H      |     |    |   |         |         |        |
| HETATM | 632 | C  | 0 | -12.883 | -16.402 | 1.240  |
| C      |     |    |   |         |         |        |
| HETATM | 633 | H  | 0 | -13.824 | -16.323 | 1.134  |
| H      |     |    |   |         |         |        |
| HETATM | 634 | C  | 0 | -12.053 | -15.484 | 0.666  |
| C      |     |    |   |         |         |        |
| HETATM | 635 | H  | 0 | -12.422 | -14.768 | 0.163  |
| H      |     |    |   |         |         |        |
| HETATM | 636 | C  | 0 | -10.641 | -15.584 | 0.813  |
| C      |     |    |   |         |         |        |
| HETATM | 637 | C  | 0 | -9.763  | -14.647 | 0.242  |
| C      |     |    |   |         |         |        |
| HETATM | 638 | H  | 0 | -10.117 | -13.927 | -0.267 |
| H      |     |    |   |         |         |        |
| HETATM | 639 | C  | 0 | -3.062  | -13.559 | -2.849 |
| C      |     |    |   |         |         |        |
| HETATM | 640 | Fe | 0 | -3.446  | 14.503  | 0.330  |
| Fe     |     |    |   |         |         |        |
| HETATM | 641 | S  | 0 | 0.817   | 15.295  | 1.143  |
| S      |     |    |   |         |         |        |
| HETATM | 642 | S  | 0 | -4.575  | 17.195  | 4.056  |
| S      |     |    |   |         |         |        |
| HETATM | 643 | N  | 0 | -2.584  | 13.289  | 1.698  |
| N      |     |    |   |         |         |        |
| HETATM | 644 | N  | 0 | -1.607  | 15.292  | 0.366  |
| N      |     |    |   |         |         |        |

|        |     |   |   |        |        |        |
|--------|-----|---|---|--------|--------|--------|
| HETATM | 645 | N | 0 | -1.036 | 16.354 | -0.283 |
| N      |     |   |   |        |        |        |
| HETATM | 646 | N | 0 | -3.971 | 15.685 | 1.779  |
| N      |     |   |   |        |        |        |
| HETATM | 647 | C | 0 | -3.153 | 12.310 | 2.389  |
| C      |     |   |   |        |        |        |
| HETATM | 648 | H | 0 | -4.082 | 12.151 | 2.276  |
| H      |     |   |   |        |        |        |
| HETATM | 649 | C | 0 | -2.440 | 11.509 | 3.271  |
| C      |     |   |   |        |        |        |
| HETATM | 650 | H | 0 | -2.880 | 10.803 | 3.732  |
| H      |     |   |   |        |        |        |
| HETATM | 651 | C | 0 | -1.106 | 11.736 | 3.482  |
| C      |     |   |   |        |        |        |
| HETATM | 652 | H | 0 | -0.611 | 11.191 | 4.082  |
| H      |     |   |   |        |        |        |
| HETATM | 653 | C | 0 | -0.497 | 12.772 | 2.801  |
| C      |     |   |   |        |        |        |
| HETATM | 654 | H | 0 | 0.424  | 12.966 | 2.933  |
| H      |     |   |   |        |        |        |
| HETATM | 655 | C | 0 | -1.258 | 13.530 | 1.918  |
| C      |     |   |   |        |        |        |
| HETATM | 656 | C | 0 | -0.775 | 14.652 | 1.149  |
| C      |     |   |   |        |        |        |
| HETATM | 657 | C | 0 | 0.227  | 16.479 | 0.007  |
| C      |     |   |   |        |        |        |
| HETATM | 658 | C | 0 | 1.122  | 17.505 | -0.550 |
| C      |     |   |   |        |        |        |
| HETATM | 659 | C | 0 | 0.597  | 18.577 | -1.307 |
| C      |     |   |   |        |        |        |
| HETATM | 660 | H | 0 | -0.342 | 18.648 | -1.430 |
| H      |     |   |   |        |        |        |
| HETATM | 661 | C | 0 | 1.414  | 19.503 | -1.859 |
| C      |     |   |   |        |        |        |
| HETATM | 662 | H | 0 | 1.039  | 20.222 | -2.357 |
| H      |     |   |   |        |        |        |
| HETATM | 663 | C | 0 | 2.825  | 19.419 | -1.708 |
| C      |     |   |   |        |        |        |
| HETATM | 664 | C | 0 | 3.712  | 20.348 | -2.289 |
| C      |     |   |   |        |        |        |
| HETATM | 665 | H | 0 | 3.365  | 21.072 | -2.797 |
| H      |     |   |   |        |        |        |
| HETATM | 666 | C | 0 | 5.069  | 20.222 | -2.131 |
| C      |     |   |   |        |        |        |
| HETATM | 667 | H | 0 | 5.650  | 20.859 | -2.530 |
| H      |     |   |   |        |        |        |
| HETATM | 668 | C | 0 | 5.608  | 19.156 | -1.381 |
| C      |     |   |   |        |        |        |
| HETATM | 669 | H | 0 | 6.548  | 19.078 | -1.277 |
| H      |     |   |   |        |        |        |
| HETATM | 670 | C | 0 | 4.777  | 18.238 | -0.808 |
| C      |     |   |   |        |        |        |
| HETATM | 671 | H | 0 | 5.147  | 17.522 | -0.305 |
| H      |     |   |   |        |        |        |
| HETATM | 672 | C | 0 | 3.366  | 18.339 | -0.954 |
| C      |     |   |   |        |        |        |

|        |     |   |   |         |        |        |
|--------|-----|---|---|---------|--------|--------|
| HETATM | 673 | C | 0 | 2.488   | 17.401 | -0.385 |
| C      |     |   |   |         |        |        |
| HETATM | 674 | H | 0 | 2.842   | 16.682 | 0.125  |
| H      |     |   |   |         |        |        |
| HETATM | 675 | C | 0 | -4.213  | 16.313 | 2.708  |
| C      |     |   |   |         |        |        |
| HETATM | 676 | S | 0 | -7.709  | 13.711 | -0.484 |
| S      |     |   |   |         |        |        |
| HETATM | 677 | S | 0 | -2.316  | 11.811 | -3.397 |
| S      |     |   |   |         |        |        |
| HETATM | 678 | N | 0 | -4.308  | 15.718 | -1.039 |
| N      |     |   |   |         |        |        |
| HETATM | 679 | N | 0 | -5.285  | 13.714 | 0.293  |
| N      |     |   |   |         |        |        |
| HETATM | 680 | N | 0 | -5.856  | 12.652 | 0.942  |
| N      |     |   |   |         |        |        |
| HETATM | 681 | N | 0 | -2.921  | 13.321 | -1.120 |
| N      |     |   |   |         |        |        |
| HETATM | 682 | C | 0 | -3.739  | 16.696 | -1.730 |
| C      |     |   |   |         |        |        |
| HETATM | 683 | H | 0 | -2.809  | 16.855 | -1.617 |
| H      |     |   |   |         |        |        |
| HETATM | 684 | C | 0 | -4.451  | 17.497 | -2.612 |
| C      |     |   |   |         |        |        |
| HETATM | 685 | H | 0 | -4.011  | 18.203 | -3.073 |
| H      |     |   |   |         |        |        |
| HETATM | 686 | C | 0 | -5.785  | 17.271 | -2.823 |
| C      |     |   |   |         |        |        |
| HETATM | 687 | H | 0 | -6.282  | 17.815 | -3.423 |
| H      |     |   |   |         |        |        |
| HETATM | 688 | C | 0 | -6.395  | 16.233 | -2.142 |
| C      |     |   |   |         |        |        |
| HETATM | 689 | H | 0 | -7.316  | 16.041 | -2.274 |
| H      |     |   |   |         |        |        |
| HETATM | 690 | C | 0 | -5.633  | 15.476 | -1.259 |
| C      |     |   |   |         |        |        |
| HETATM | 691 | C | 0 | -6.117  | 14.354 | -0.490 |
| C      |     |   |   |         |        |        |
| HETATM | 692 | C | 0 | -7.120  | 12.526 | 0.652  |
| C      |     |   |   |         |        |        |
| HETATM | 693 | C | 0 | -8.013  | 11.501 | 1.209  |
| C      |     |   |   |         |        |        |
| HETATM | 694 | C | 0 | -7.488  | 10.429 | 1.966  |
| C      |     |   |   |         |        |        |
| HETATM | 695 | H | 0 | -6.550  | 10.358 | 2.089  |
| H      |     |   |   |         |        |        |
| HETATM | 696 | C | 0 | -8.305  | 9.503  | 2.519  |
| C      |     |   |   |         |        |        |
| HETATM | 697 | H | 0 | -7.932  | 8.785  | 3.016  |
| H      |     |   |   |         |        |        |
| HETATM | 698 | C | 0 | -9.716  | 9.587  | 2.367  |
| C      |     |   |   |         |        |        |
| HETATM | 699 | C | 0 | -10.604 | 8.658  | 2.948  |
| C      |     |   |   |         |        |        |
| HETATM | 700 | H | 0 | -10.257 | 7.935  | 3.456  |
| H      |     |   |   |         |        |        |

|        |     |    |   |         |        |        |
|--------|-----|----|---|---------|--------|--------|
| HETATM | 701 | C  | 0 | -11.960 | 8.785  | 2.790  |
| C      |     |    |   |         |        |        |
| HETATM | 702 | H  | 0 | -12.542 | 8.147  | 3.189  |
| H      |     |    |   |         |        |        |
| HETATM | 703 | C  | 0 | -12.499 | 9.851  | 2.040  |
| C      |     |    |   |         |        |        |
| HETATM | 704 | H  | 0 | -13.440 | 9.929  | 1.936  |
| H      |     |    |   |         |        |        |
| HETATM | 705 | C  | 0 | -11.670 | 10.769 | 1.467  |
| C      |     |    |   |         |        |        |
| HETATM | 706 | H  | 0 | -12.039 | 11.484 | 0.964  |
| H      |     |    |   |         |        |        |
| HETATM | 707 | C  | 0 | -10.258 | 10.667 | 1.613  |
| C      |     |    |   |         |        |        |
| HETATM | 708 | C  | 0 | -9.379  | 11.605 | 1.044  |
| C      |     |    |   |         |        |        |
| HETATM | 709 | H  | 0 | -9.734  | 12.324 | 0.534  |
| H      |     |    |   |         |        |        |
| HETATM | 710 | C  | 0 | -2.679  | 12.693 | -2.049 |
| C      |     |    |   |         |        |        |
| HETATM | 711 | Fe | 0 | -7.275  | 2.754  | -0.142 |
| Fe     |     |    |   |         |        |        |
| HETATM | 712 | S  | 0 | -3.013  | 3.546  | 0.672  |
| S      |     |    |   |         |        |        |
| HETATM | 713 | S  | 0 | -8.404  | 5.448  | 3.584  |
| S      |     |    |   |         |        |        |
| HETATM | 714 | N  | 0 | -6.413  | 1.540  | 1.226  |
| N      |     |    |   |         |        |        |
| HETATM | 715 | N  | 0 | -5.436  | 3.543  | -0.106 |
| N      |     |    |   |         |        |        |
| HETATM | 716 | N  | 0 | -4.866  | 4.606  | -0.754 |
| N      |     |    |   |         |        |        |
| HETATM | 717 | N  | 0 | -7.801  | 3.937  | 1.307  |
| N      |     |    |   |         |        |        |
| HETATM | 718 | C  | 0 | -6.982  | 0.562  | 1.917  |
| C      |     |    |   |         |        |        |
| HETATM | 719 | H  | 0 | -7.913  | 0.402  | 1.805  |
| H      |     |    |   |         |        |        |
| HETATM | 720 | C  | 0 | -6.271  | -0.240 | 2.800  |
| C      |     |    |   |         |        |        |
| HETATM | 721 | H  | 0 | -6.709  | -0.946 | 3.259  |
| H      |     |    |   |         |        |        |
| HETATM | 722 | C  | 0 | -4.937  | -0.013 | 3.010  |
| C      |     |    |   |         |        |        |
| HETATM | 723 | H  | 0 | -4.440  | -0.557 | 3.611  |
| H      |     |    |   |         |        |        |
| HETATM | 724 | C  | 0 | -4.326  | 1.025  | 2.329  |
| C      |     |    |   |         |        |        |
| HETATM | 725 | H  | 0 | -3.406  | 1.217  | 2.462  |
| H      |     |    |   |         |        |        |
| HETATM | 726 | C  | 0 | -5.087  | 1.782  | 1.447  |
| C      |     |    |   |         |        |        |
| HETATM | 727 | C  | 0 | -4.604  | 2.904  | 0.677  |
| C      |     |    |   |         |        |        |
| HETATM | 728 | C  | 0 | -3.602  | 4.731  | -0.464 |
| C      |     |    |   |         |        |        |

|        |     |   |   |         |       |        |
|--------|-----|---|---|---------|-------|--------|
| HETATM | 729 | C | 0 | -2.707  | 5.757 | -1.022 |
| C      |     |   |   |         |       |        |
| HETATM | 730 | C | 0 | -3.232  | 6.829 | -1.779 |
| C      |     |   |   |         |       |        |
| HETATM | 731 | H | 0 | -4.171  | 6.900 | -1.902 |
| H      |     |   |   |         |       |        |
| HETATM | 732 | C | 0 | -2.416  | 7.755 | -2.331 |
| C      |     |   |   |         |       |        |
| HETATM | 733 | H | 0 | -2.790  | 8.473 | -2.828 |
| H      |     |   |   |         |       |        |
| HETATM | 734 | C | 0 | -1.004  | 7.670 | -2.179 |
| C      |     |   |   |         |       |        |
| HETATM | 735 | C | 0 | -0.117  | 8.599 | -2.761 |
| C      |     |   |   |         |       |        |
| HETATM | 736 | H | 0 | -0.464  | 9.323 | -3.269 |
| H      |     |   |   |         |       |        |
| HETATM | 737 | C | 0 | 1.239   | 8.473 | -2.602 |
| C      |     |   |   |         |       |        |
| HETATM | 738 | H | 0 | 1.821   | 9.110 | -3.001 |
| H      |     |   |   |         |       |        |
| HETATM | 739 | C | 0 | 1.778   | 7.408 | -1.854 |
| C      |     |   |   |         |       |        |
| HETATM | 740 | H | 0 | 2.719   | 7.330 | -1.748 |
| H      |     |   |   |         |       |        |
| HETATM | 741 | C | 0 | 0.948   | 6.489 | -1.280 |
| C      |     |   |   |         |       |        |
| HETATM | 742 | H | 0 | 1.318   | 5.774 | -0.777 |
| H      |     |   |   |         |       |        |
| HETATM | 743 | C | 0 | -0.464  | 6.591 | -1.427 |
| C      |     |   |   |         |       |        |
| HETATM | 744 | C | 0 | -1.342  | 5.652 | -0.856 |
| C      |     |   |   |         |       |        |
| HETATM | 745 | H | 0 | -0.988  | 4.933 | -0.346 |
| H      |     |   |   |         |       |        |
| HETATM | 746 | C | 0 | -8.043  | 4.564 | 2.235  |
| C      |     |   |   |         |       |        |
| HETATM | 747 | S | 0 | -11.538 | 1.962 | -0.956 |
| S      |     |   |   |         |       |        |
| HETATM | 748 | S | 0 | -6.146  | 0.062 | -3.868 |
| S      |     |   |   |         |       |        |
| HETATM | 749 | N | 0 | -8.137  | 3.969 | -1.511 |
| N      |     |   |   |         |       |        |
| HETATM | 750 | N | 0 | -9.114  | 1.966 | -0.179 |
| N      |     |   |   |         |       |        |
| HETATM | 751 | N | 0 | -9.685  | 0.903 | 0.469  |
| N      |     |   |   |         |       |        |
| HETATM | 752 | N | 0 | -6.750  | 1.572 | -1.592 |
| N      |     |   |   |         |       |        |
| HETATM | 753 | C | 0 | -7.568  | 4.947 | -2.201 |
| C      |     |   |   |         |       |        |
| HETATM | 754 | H | 0 | -6.638  | 5.106 | -2.089 |
| H      |     |   |   |         |       |        |
| HETATM | 755 | C | 0 | -8.281  | 5.748 | -3.084 |
| C      |     |   |   |         |       |        |
| HETATM | 756 | H | 0 | -7.841  | 6.454 | -3.544 |
| H      |     |   |   |         |       |        |

|        |     |    |   |         |        |        |
|--------|-----|----|---|---------|--------|--------|
| HETATM | 757 | C  | 0 | -9.615  | 5.522  | -3.295 |
| C      |     |    |   |         |        |        |
| HETATM | 758 | H  | 0 | -10.111 | 6.066  | -3.895 |
| H      |     |    |   |         |        |        |
| HETATM | 759 | C  | 0 | -10.224 | 4.485  | -2.614 |
| C      |     |    |   |         |        |        |
| HETATM | 760 | H  | 0 | -11.145 | 4.292  | -2.747 |
| H      |     |    |   |         |        |        |
| HETATM | 761 | C  | 0 | -9.463  | 3.727  | -1.730 |
| C      |     |    |   |         |        |        |
| HETATM | 762 | C  | 0 | -9.946  | 2.605  | -0.962 |
| C      |     |    |   |         |        |        |
| HETATM | 763 | C  | 0 | -10.949 | 0.778  | 0.180  |
| C      |     |    |   |         |        |        |
| HETATM | 764 | C  | 0 | -11.843 | -0.247 | 0.738  |
| C      |     |    |   |         |        |        |
| HETATM | 765 | C  | 0 | -11.318 | -1.320 | 1.494  |
| C      |     |    |   |         |        |        |
| HETATM | 766 | H  | 0 | -10.379 | -1.391 | 1.617  |
| H      |     |    |   |         |        |        |
| HETATM | 767 | C  | 0 | -12.135 | -2.246 | 2.047  |
| C      |     |    |   |         |        |        |
| HETATM | 768 | H  | 0 | -11.761 | -2.964 | 2.543  |
| H      |     |    |   |         |        |        |
| HETATM | 769 | C  | 0 | -13.545 | -2.161 | 1.895  |
| C      |     |    |   |         |        |        |
| HETATM | 770 | C  | 0 | -14.434 | -3.091 | 2.477  |
| C      |     |    |   |         |        |        |
| HETATM | 771 | H  | 0 | -14.087 | -3.814 | 2.984  |
| H      |     |    |   |         |        |        |
| HETATM | 772 | C  | 0 | -15.790 | -2.964 | 2.318  |
| C      |     |    |   |         |        |        |
| HETATM | 773 | H  | 0 | -16.372 | -3.601 | 2.716  |
| H      |     |    |   |         |        |        |
| HETATM | 774 | C  | 0 | -16.328 | -1.898 | 1.569  |
| C      |     |    |   |         |        |        |
| HETATM | 775 | H  | 0 | -17.269 | -1.820 | 1.463  |
| H      |     |    |   |         |        |        |
| HETATM | 776 | C  | 0 | -15.499 | -0.980 | 0.995  |
| C      |     |    |   |         |        |        |
| HETATM | 777 | H  | 0 | -15.868 | -0.264 | 0.493  |
| H      |     |    |   |         |        |        |
| HETATM | 778 | C  | 0 | -14.087 | -1.082 | 1.142  |
| C      |     |    |   |         |        |        |
| HETATM | 779 | C  | 0 | -13.209 | -0.144 | 0.571  |
| C      |     |    |   |         |        |        |
| HETATM | 780 | H  | 0 | -13.563 | 0.576  | 0.062  |
| H      |     |    |   |         |        |        |
| HETATM | 781 | C  | 0 | -6.508  | 0.945  | -2.520 |
| C      |     |    |   |         |        |        |
| HETATM | 782 | Fe | 0 | -11.105 | -8.994 | -0.614 |
| Fe     |     |    |   |         |        |        |
| HETATM | 783 | S  | 0 | -6.842  | -8.202 | 0.200  |
| S      |     |    |   |         |        |        |
| HETATM | 784 | S  | 0 | -12.234 | -6.301 | 3.112  |
| S      |     |    |   |         |        |        |

|        |     |   |   |         |         |        |
|--------|-----|---|---|---------|---------|--------|
| HETATM | 785 | N | 0 | -10.243 | -10.209 | 0.755  |
| N      |     |   |   |         |         |        |
| HETATM | 786 | N | 0 | -9.267  | -8.206  | -0.577 |
| N      |     |   |   |         |         |        |
| HETATM | 787 | N | 0 | -8.695  | -7.143  | -1.225 |
| N      |     |   |   |         |         |        |
| HETATM | 788 | N | 0 | -11.630 | -7.812  | 0.835  |
| N      |     |   |   |         |         |        |
| HETATM | 789 | C | 0 | -10.811 | -11.187 | 1.445  |
| C      |     |   |   |         |         |        |
| HETATM | 790 | H | 0 | -11.742 | -11.347 | 1.332  |
| H      |     |   |   |         |         |        |
| HETATM | 791 | C | 0 | -10.100 | -11.988 | 2.328  |
| C      |     |   |   |         |         |        |
| HETATM | 792 | H | 0 | -10.539 | -12.693 | 2.788  |
| H      |     |   |   |         |         |        |
| HETATM | 793 | C | 0 | -8.766  | -11.761 | 2.539  |
| C      |     |   |   |         |         |        |
| HETATM | 794 | H | 0 | -8.269  | -12.306 | 3.139  |
| H      |     |   |   |         |         |        |
| HETATM | 795 | C | 0 | -8.156  | -10.724 | 1.858  |
| C      |     |   |   |         |         |        |
| HETATM | 796 | H | 0 | -7.235  | -10.532 | 1.991  |
| H      |     |   |   |         |         |        |
| HETATM | 797 | C | 0 | -8.917  | -9.967  | 0.974  |
| C      |     |   |   |         |         |        |
| HETATM | 798 | C | 0 | -8.434  | -8.845  | 0.205  |
| C      |     |   |   |         |         |        |
| HETATM | 799 | C | 0 | -7.431  | -7.017  | -0.937 |
| C      |     |   |   |         |         |        |
| HETATM | 800 | C | 0 | -6.537  | -5.992  | -1.494 |
| C      |     |   |   |         |         |        |
| HETATM | 801 | C | 0 | -7.063  | -4.920  | -2.251 |
| C      |     |   |   |         |         |        |
| HETATM | 802 | H | 0 | -8.001  | -4.848  | -2.374 |
| H      |     |   |   |         |         |        |
| HETATM | 803 | C | 0 | -6.245  | -3.993  | -2.803 |
| C      |     |   |   |         |         |        |
| HETATM | 804 | H | 0 | -6.620  | -3.276  | -3.300 |
| H      |     |   |   |         |         |        |
| HETATM | 805 | C | 0 | -4.835  | -4.079  | -2.651 |
| C      |     |   |   |         |         |        |
| HETATM | 806 | C | 0 | -3.946  | -3.149  | -3.233 |
| C      |     |   |   |         |         |        |
| HETATM | 807 | H | 0 | -4.294  | -2.426  | -3.741 |
| H      |     |   |   |         |         |        |
| HETATM | 808 | C | 0 | -2.590  | -3.276  | -3.075 |
| C      |     |   |   |         |         |        |
| HETATM | 809 | H | 0 | -2.008  | -2.639  | -3.472 |
| H      |     |   |   |         |         |        |
| HETATM | 810 | C | 0 | -2.052  | -4.341  | -2.325 |
| C      |     |   |   |         |         |        |
| HETATM | 811 | H | 0 | -1.110  | -4.419  | -2.219 |
| H      |     |   |   |         |         |        |
| HETATM | 812 | C | 0 | -2.881  | -5.259  | -1.751 |
| C      |     |   |   |         |         |        |

|        |     |   |   |         |         |        |
|--------|-----|---|---|---------|---------|--------|
| HETATM | 813 | H | 0 | -2.512  | -5.975  | -1.249 |
| H      |     |   |   |         |         |        |
| HETATM | 814 | C | 0 | -4.293  | -5.158  | -1.898 |
| C      |     |   |   |         |         |        |
| HETATM | 815 | C | 0 | -5.171  | -6.096  | -1.328 |
| C      |     |   |   |         |         |        |
| HETATM | 816 | H | 0 | -4.817  | -6.816  | -0.818 |
| H      |     |   |   |         |         |        |
| HETATM | 817 | C | 0 | -11.872 | -7.185  | 1.764  |
| C      |     |   |   |         |         |        |
| HETATM | 818 | S | 0 | -15.368 | -9.786  | -1.428 |
| S      |     |   |   |         |         |        |
| HETATM | 819 | S | 0 | -9.975  | -11.687 | -4.340 |
| S      |     |   |   |         |         |        |
| HETATM | 820 | N | 0 | -11.967 | -7.780  | -1.982 |
| N      |     |   |   |         |         |        |
| HETATM | 821 | N | 0 | -12.943 | -9.782  | -0.650 |
| N      |     |   |   |         |         |        |
| HETATM | 822 | N | 0 | -13.514 | -10.845 | -0.002 |
| N      |     |   |   |         |         |        |
| HETATM | 823 | N | 0 | -10.580 | -10.177 | -2.063 |
| N      |     |   |   |         |         |        |
| HETATM | 824 | C | 0 | -11.398 | -6.801  | -2.674 |
| C      |     |   |   |         |         |        |
| HETATM | 825 | H | 0 | -10.468 | -6.642  | -2.561 |
| H      |     |   |   |         |         |        |
| HETATM | 826 | C | 0 | -12.110 | -6.000  | -3.556 |
| C      |     |   |   |         |         |        |
| HETATM | 827 | H | 0 | -11.670 | -5.295  | -4.015 |
| H      |     |   |   |         |         |        |
| HETATM | 828 | C | 0 | -13.444 | -6.227  | -3.767 |
| C      |     |   |   |         |         |        |
| HETATM | 829 | H | 0 | -13.940 | -5.682  | -4.367 |
| H      |     |   |   |         |         |        |
| HETATM | 830 | C | 0 | -14.054 | -7.264  | -3.085 |
| C      |     |   |   |         |         |        |
| HETATM | 831 | H | 0 | -14.974 | -7.456  | -3.218 |
| H      |     |   |   |         |         |        |
| HETATM | 832 | C | 0 | -13.293 | -8.021  | -2.203 |
| C      |     |   |   |         |         |        |
| HETATM | 833 | C | 0 | -13.776 | -9.144  | -1.433 |
| C      |     |   |   |         |         |        |
| HETATM | 834 | C | 0 | -14.778 | -10.971 | -0.292 |
| C      |     |   |   |         |         |        |
| HETATM | 835 | C | 0 | -15.673 | -11.996 | 0.266  |
| C      |     |   |   |         |         |        |
| HETATM | 836 | C | 0 | -15.147 | -13.069 | 1.023  |
| C      |     |   |   |         |         |        |
| HETATM | 837 | H | 0 | -14.209 | -13.140 | 1.146  |
| H      |     |   |   |         |         |        |
| HETATM | 838 | C | 0 | -15.964 | -13.995 | 1.576  |
| C      |     |   |   |         |         |        |
| HETATM | 839 | H | 0 | -15.590 | -14.712 | 2.072  |
| H      |     |   |   |         |         |        |
| HETATM | 840 | C | 0 | -17.375 | -13.910 | 1.423  |
| C      |     |   |   |         |         |        |



|        |     |    |   |         |         |        |
|--------|-----|----|---|---------|---------|--------|
| HETATM | 841 | C  | 0 | -18.263 | -14.839 | 2.004  |
| C      |     |    |   |         |         |        |
| HETATM | 842 | H  | 0 | -17.916 | -15.563 | 2.513  |
| H      |     |    |   |         |         |        |
| HETATM | 843 | C  | 0 | -19.620 | -14.713 | 1.846  |
| C      |     |    |   |         |         |        |
| HETATM | 844 | H  | 0 | -20.202 | -15.350 | 2.245  |
| H      |     |    |   |         |         |        |
| HETATM | 845 | C  | 0 | -20.158 | -13.647 | 1.098  |
| C      |     |    |   |         |         |        |
| HETATM | 846 | H  | 0 | -21.099 | -13.569 | 0.992  |
| H      |     |    |   |         |         |        |
| HETATM | 847 | C  | 0 | -19.328 | -12.729 | 0.524  |
| C      |     |    |   |         |         |        |
| HETATM | 848 | H  | 0 | -19.698 | -12.013 | 0.021  |
| H      |     |    |   |         |         |        |
| HETATM | 849 | C  | 0 | -17.916 | -12.830 | 0.671  |
| C      |     |    |   |         |         |        |
| HETATM | 850 | C  | 0 | -17.039 | -11.893 | 0.100  |
| C      |     |    |   |         |         |        |
| HETATM | 851 | H  | 0 | -17.393 | -11.173 | -0.410 |
| H      |     |    |   |         |         |        |
| HETATM | 852 | C  | 0 | -10.338 | -10.804 | -2.992 |
| C      |     |    |   |         |         |        |
| HETATM | 853 | Fe | 0 | -10.721 | 17.258  | 0.187  |
| Fe     |     |    |   |         |         |        |
| HETATM | 854 | S  | 0 | -6.458  | 18.049  | 1.001  |
| S      |     |    |   |         |         |        |
| HETATM | 855 | S  | 0 | -11.851 | 19.950  | 3.914  |
| S      |     |    |   |         |         |        |
| HETATM | 856 | N  | 0 | -9.859  | 16.043  | 1.555  |
| N      |     |    |   |         |         |        |
| HETATM | 857 | N  | 0 | -8.882  | 18.046  | 0.223  |
| N      |     |    |   |         |         |        |
| HETATM | 858 | N  | 0 | -8.311  | 19.109  | -0.425 |
| N      |     |    |   |         |         |        |
| HETATM | 859 | N  | 0 | -11.246 | 18.440  | 1.637  |
| N      |     |    |   |         |         |        |
| HETATM | 860 | C  | 0 | -10.428 | 15.065  | 2.247  |
| C      |     |    |   |         |         |        |
| HETATM | 861 | H  | 0 | -11.358 | 14.906  | 2.134  |
| H      |     |    |   |         |         |        |
| HETATM | 862 | C  | 0 | -9.716  | 14.263  | 3.129  |
| C      |     |    |   |         |         |        |
| HETATM | 863 | H  | 0 | -10.156 | 13.558  | 3.589  |
| H      |     |    |   |         |         |        |
| HETATM | 864 | C  | 0 | -8.382  | 14.490  | 3.340  |
| C      |     |    |   |         |         |        |
| HETATM | 865 | H  | 0 | -7.885  | 13.946  | 3.940  |
| H      |     |    |   |         |         |        |
| HETATM | 866 | C  | 0 | -7.773  | 15.527  | 2.659  |
| C      |     |    |   |         |         |        |
| HETATM | 867 | H  | 0 | -6.851  | 15.720  | 2.791  |
| H      |     |    |   |         |         |        |
| HETATM | 868 | C  | 0 | -8.534  | 16.284  | 1.776  |
| C      |     |    |   |         |         |        |

|        |     |   |   |         |        |        |
|--------|-----|---|---|---------|--------|--------|
| HETATM | 869 | C | 0 | -8.050  | 17.406 | 1.007  |
| C      |     |   |   |         |        |        |
| HETATM | 870 | C | 0 | -7.047  | 19.234 | -0.135 |
| C      |     |   |   |         |        |        |
| HETATM | 871 | C | 0 | -6.153  | 20.260 | -0.692 |
| C      |     |   |   |         |        |        |
| HETATM | 872 | C | 0 | -6.679  | 21.332 | -1.449 |
| C      |     |   |   |         |        |        |
| HETATM | 873 | H | 0 | -7.617  | 21.403 | -1.572 |
| H      |     |   |   |         |        |        |
| HETATM | 874 | C | 0 | -5.862  | 22.258 | -2.002 |
| C      |     |   |   |         |        |        |
| HETATM | 875 | H | 0 | -6.235  | 22.976 | -2.499 |
| H      |     |   |   |         |        |        |
| HETATM | 876 | C | 0 | -4.451  | 22.174 | -1.850 |
| C      |     |   |   |         |        |        |
| HETATM | 877 | C | 0 | -3.562  | 23.102 | -2.431 |
| C      |     |   |   |         |        |        |
| HETATM | 878 | H | 0 | -3.910  | 23.826 | -2.939 |
| H      |     |   |   |         |        |        |
| HETATM | 879 | C | 0 | -2.206  | 22.976 | -2.273 |
| C      |     |   |   |         |        |        |
| HETATM | 880 | H | 0 | -1.624  | 23.613 | -2.672 |
| H      |     |   |   |         |        |        |
| HETATM | 881 | C | 0 | -1.668  | 21.910 | -1.524 |
| C      |     |   |   |         |        |        |
| HETATM | 882 | H | 0 | -0.728  | 21.832 | -1.419 |
| H      |     |   |   |         |        |        |
| HETATM | 883 | C | 0 | -2.497  | 20.992 | -0.951 |
| C      |     |   |   |         |        |        |
| HETATM | 884 | H | 0 | -2.128  | 20.276 | -0.447 |
| H      |     |   |   |         |        |        |
| HETATM | 885 | C | 0 | -3.909  | 21.094 | -1.097 |
| C      |     |   |   |         |        |        |
| HETATM | 886 | C | 0 | -4.787  | 20.156 | -0.527 |
| C      |     |   |   |         |        |        |
| HETATM | 887 | H | 0 | -4.433  | 19.437 | -0.017 |
| H      |     |   |   |         |        |        |
| HETATM | 888 | C | 0 | -11.488 | 19.067 | 2.565  |
| C      |     |   |   |         |        |        |
| HETATM | 889 | S | 0 | -14.984 | 16.466 | -0.627 |
| S      |     |   |   |         |        |        |
| HETATM | 890 | S | 0 | -9.592  | 14.565 | -3.539 |
| S      |     |   |   |         |        |        |
| HETATM | 891 | N | 0 | -11.583 | 18.472 | -1.181 |
| N      |     |   |   |         |        |        |
| HETATM | 892 | N | 0 | -12.560 | 16.469 | 0.151  |
| N      |     |   |   |         |        |        |
| HETATM | 893 | N | 0 | -13.131 | 15.406 | 0.799  |
| N      |     |   |   |         |        |        |
| HETATM | 894 | N | 0 | -10.195 | 16.075 | -1.263 |
| N      |     |   |   |         |        |        |
| HETATM | 895 | C | 0 | -11.015 | 19.450 | -1.872 |
| C      |     |   |   |         |        |        |
| HETATM | 896 | H | 0 | -10.084 | 19.610 | -1.759 |
| H      |     |   |   |         |        |        |

|        |     |    |   |         |        |        |
|--------|-----|----|---|---------|--------|--------|
| HETATM | 897 | C  | 0 | -11.726 | 20.252 | -2.755 |
| C      |     |    |   |         |        |        |
| HETATM | 898 | H  | 0 | -11.287 | 20.958 | -3.215 |
| H      |     |    |   |         |        |        |
| HETATM | 899 | C  | 0 | -13.060 | 20.025 | -2.965 |
| C      |     |    |   |         |        |        |
| HETATM | 900 | H  | 0 | -13.556 | 20.570 | -3.565 |
| H      |     |    |   |         |        |        |
| HETATM | 901 | C  | 0 | -13.670 | 18.988 | -2.285 |
| C      |     |    |   |         |        |        |
| HETATM | 902 | H  | 0 | -14.591 | 18.795 | -2.417 |
| H      |     |    |   |         |        |        |
| HETATM | 903 | C  | 0 | -12.909 | 18.231 | -1.401 |
| C      |     |    |   |         |        |        |
| HETATM | 904 | C  | 0 | -13.392 | 17.109 | -0.632 |
| C      |     |    |   |         |        |        |
| HETATM | 905 | C  | 0 | -14.395 | 15.281 | 0.510  |
| C      |     |    |   |         |        |        |
| HETATM | 906 | C  | 0 | -15.289 | 14.255 | 1.067  |
| C      |     |    |   |         |        |        |
| HETATM | 907 | C  | 0 | -14.764 | 13.183 | 1.824  |
| C      |     |    |   |         |        |        |
| HETATM | 908 | H  | 0 | -13.825 | 13.112 | 1.947  |
| H      |     |    |   |         |        |        |
| HETATM | 909 | C  | 0 | -15.580 | 12.257 | 2.376  |
| C      |     |    |   |         |        |        |
| HETATM | 910 | H  | 0 | -15.206 | 11.539 | 2.873  |
| H      |     |    |   |         |        |        |
| HETATM | 911 | C  | 0 | -16.992 | 12.342 | 2.225  |
| C      |     |    |   |         |        |        |
| HETATM | 912 | C  | 0 | -17.879 | 11.413 | 2.806  |
| C      |     |    |   |         |        |        |
| HETATM | 913 | H  | 0 | -17.532 | 10.689 | 3.314  |
| H      |     |    |   |         |        |        |
| HETATM | 914 | C  | 0 | -19.236 | 11.539 | 2.648  |
| C      |     |    |   |         |        |        |
| HETATM | 915 | H  | 0 | -19.817 | 10.902 | 3.046  |
| H      |     |    |   |         |        |        |
| HETATM | 916 | C  | 0 | -19.774 | 12.605 | 1.898  |
| C      |     |    |   |         |        |        |
| HETATM | 917 | H  | 0 | -20.715 | 12.683 | 1.793  |
| H      |     |    |   |         |        |        |
| HETATM | 918 | C  | 0 | -18.944 | 13.523 | 1.325  |
| C      |     |    |   |         |        |        |
| HETATM | 919 | H  | 0 | -19.314 | 14.238 | 0.822  |
| H      |     |    |   |         |        |        |
| HETATM | 920 | C  | 0 | -17.532 | 13.421 | 1.471  |
| C      |     |    |   |         |        |        |
| HETATM | 921 | C  | 0 | -16.655 | 14.359 | 0.902  |
| C      |     |    |   |         |        |        |
| HETATM | 922 | H  | 0 | -17.009 | 15.078 | 0.392  |
| H      |     |    |   |         |        |        |
| HETATM | 923 | C  | 0 | -9.954  | 15.448 | -2.191 |
| C      |     |    |   |         |        |        |
| HETATM | 924 | Fe | 0 | -14.551 | 5.509  | -0.284 |
| Fe     |     |    |   |         |        |        |

|        |     |   |   |         |        |        |
|--------|-----|---|---|---------|--------|--------|
| HETATM | 925 | S | 0 | -10.288 | 6.301  | 0.530  |
| S      |     |   |   |         |        |        |
| HETATM | 926 | S | 0 | -15.680 | 8.202  | 3.441  |
| S      |     |   |   |         |        |        |
| HETATM | 927 | N | 0 | -13.689 | 4.294  | 1.084  |
| N      |     |   |   |         |        |        |
| HETATM | 928 | N | 0 | -12.712 | 6.297  | -0.248 |
| N      |     |   |   |         |        |        |
| HETATM | 929 | N | 0 | -12.141 | 7.360  | -0.896 |
| N      |     |   |   |         |        |        |
| HETATM | 930 | N | 0 | -15.076 | 6.691  | 1.165  |
| N      |     |   |   |         |        |        |
| HETATM | 931 | C | 0 | -14.258 | 3.316  | 1.775  |
| C      |     |   |   |         |        |        |
| HETATM | 932 | H | 0 | -15.187 | 3.157  | 1.663  |
| H      |     |   |   |         |        |        |
| HETATM | 933 | C | 0 | -13.545 | 2.514  | 2.658  |
| C      |     |   |   |         |        |        |
| HETATM | 934 | H | 0 | -13.985 | 1.809  | 3.117  |
| H      |     |   |   |         |        |        |
| HETATM | 935 | C | 0 | -12.211 | 2.741  | 2.868  |
| C      |     |   |   |         |        |        |
| HETATM | 936 | H | 0 | -11.714 | 2.198  | 3.468  |
| H      |     |   |   |         |        |        |
| HETATM | 937 | C | 0 | -11.602 | 3.779  | 2.187  |
| C      |     |   |   |         |        |        |
| HETATM | 938 | H | 0 | -10.681 | 3.971  | 2.320  |
| H      |     |   |   |         |        |        |
| HETATM | 939 | C | 0 | -12.363 | 4.536  | 1.304  |
| C      |     |   |   |         |        |        |
| HETATM | 940 | C | 0 | -11.879 | 5.659  | 0.535  |
| C      |     |   |   |         |        |        |
| HETATM | 941 | C | 0 | -10.876 | 7.486  | -0.606 |
| C      |     |   |   |         |        |        |
| HETATM | 942 | C | 0 | -9.983  | 8.511  | -1.164 |
| C      |     |   |   |         |        |        |
| HETATM | 943 | C | 0 | -10.508 | 9.583  | -1.922 |
| C      |     |   |   |         |        |        |
| HETATM | 944 | H | 0 | -11.446 | 9.655  | -2.044 |
| H      |     |   |   |         |        |        |
| HETATM | 945 | C | 0 | -9.691  | 10.510 | -2.473 |
| C      |     |   |   |         |        |        |
| HETATM | 946 | H | 0 | -10.065 | 11.227 | -2.970 |
| H      |     |   |   |         |        |        |
| HETATM | 947 | C | 0 | -8.280  | 10.425 | -2.322 |
| C      |     |   |   |         |        |        |
| HETATM | 948 | C | 0 | -7.393  | 11.354 | -2.903 |
| C      |     |   |   |         |        |        |
| HETATM | 949 | H | 0 | -7.740  | 12.077 | -3.412 |
| H      |     |   |   |         |        |        |
| HETATM | 950 | C | 0 | -6.036  | 11.227 | -2.745 |
| C      |     |   |   |         |        |        |
| HETATM | 951 | H | 0 | -5.455  | 11.865 | -3.143 |
| H      |     |   |   |         |        |        |
| HETATM | 952 | C | 0 | -5.497  | 10.162 | -1.996 |
| C      |     |   |   |         |        |        |

|        |     |   |   |         |        |        |
|--------|-----|---|---|---------|--------|--------|
| HETATM | 953 | H | 0 | -4.557  | 10.084 | -1.890 |
| H      |     |   |   |         |        |        |
| HETATM | 954 | C | 0 | -6.327  | 9.243  | -1.422 |
| C      |     |   |   |         |        |        |
| HETATM | 955 | H | 0 | -5.957  | 8.528  | -0.920 |
| H      |     |   |   |         |        |        |
| HETATM | 956 | C | 0 | -7.739  | 9.345  | -1.569 |
| C      |     |   |   |         |        |        |
| HETATM | 957 | C | 0 | -8.617  | 8.407  | -0.998 |
| C      |     |   |   |         |        |        |
| HETATM | 958 | H | 0 | -8.262  | 7.688  | -0.489 |
| H      |     |   |   |         |        |        |
| HETATM | 959 | C | 0 | -15.317 | 7.319  | 2.093  |
| C      |     |   |   |         |        |        |
| HETATM | 960 | S | 0 | -18.813 | 4.717  | -1.098 |
| S      |     |   |   |         |        |        |
| HETATM | 961 | S | 0 | -13.421 | 2.816  | -4.010 |
| S      |     |   |   |         |        |        |
| HETATM | 962 | N | 0 | -15.413 | 6.723  | -1.653 |
| N      |     |   |   |         |        |        |
| HETATM | 963 | N | 0 | -16.390 | 4.720  | -0.321 |
| N      |     |   |   |         |        |        |
| HETATM | 964 | N | 0 | -16.961 | 3.658  | 0.327  |
| N      |     |   |   |         |        |        |
| HETATM | 965 | N | 0 | -14.026 | 4.326  | -1.734 |
| N      |     |   |   |         |        |        |
| HETATM | 966 | C | 0 | -14.844 | 7.701  | -2.344 |
| C      |     |   |   |         |        |        |
| HETATM | 967 | H | 0 | -13.914 | 7.861  | -2.231 |
| H      |     |   |   |         |        |        |
| HETATM | 968 | C | 0 | -15.556 | 8.503  | -3.226 |
| C      |     |   |   |         |        |        |
| HETATM | 969 | H | 0 | -15.116 | 9.209  | -3.686 |
| H      |     |   |   |         |        |        |
| HETATM | 970 | C | 0 | -16.890 | 8.276  | -3.438 |
| C      |     |   |   |         |        |        |
| HETATM | 971 | H | 0 | -17.386 | 8.821  | -4.037 |
| H      |     |   |   |         |        |        |
| HETATM | 972 | C | 0 | -17.499 | 7.239  | -2.756 |
| C      |     |   |   |         |        |        |
| HETATM | 973 | H | 0 | -18.420 | 7.046  | -2.889 |
| H      |     |   |   |         |        |        |
| HETATM | 974 | C | 0 | -16.738 | 6.482  | -1.872 |
| C      |     |   |   |         |        |        |
| HETATM | 975 | C | 0 | -17.222 | 5.360  | -1.104 |
| C      |     |   |   |         |        |        |
| HETATM | 976 | C | 0 | -18.224 | 3.533  | 0.038  |
| C      |     |   |   |         |        |        |
| HETATM | 977 | C | 0 | -19.118 | 2.507  | 0.596  |
| C      |     |   |   |         |        |        |
| HETATM | 978 | C | 0 | -18.594 | 1.435  | 1.352  |
| C      |     |   |   |         |        |        |
| HETATM | 979 | H | 0 | -17.654 | 1.364  | 1.475  |
| H      |     |   |   |         |        |        |
| HETATM | 980 | C | 0 | -19.410 | 0.509  | 1.905  |
| C      |     |   |   |         |        |        |

|        |      |    |   |         |        |        |
|--------|------|----|---|---------|--------|--------|
| HETATM | 981  | H  | 0 | -19.036 | -0.210 | 2.401  |
| H      |      |    |   |         |        |        |
| HETATM | 982  | C  | 0 | -20.821 | 0.594  | 1.753  |
| C      |      |    |   |         |        |        |
| HETATM | 983  | C  | 0 | -21.709 | -0.336 | 2.335  |
| C      |      |    |   |         |        |        |
| HETATM | 984  | H  | 0 | -21.362 | -1.060 | 2.842  |
| H      |      |    |   |         |        |        |
| HETATM | 985  | C  | 0 | -23.065 | -0.210 | 2.176  |
| C      |      |    |   |         |        |        |
| HETATM | 986  | H  | 0 | -23.647 | -0.847 | 2.574  |
| H      |      |    |   |         |        |        |
| HETATM | 987  | C  | 0 | -23.604 | 0.856  | 1.427  |
| C      |      |    |   |         |        |        |
| HETATM | 988  | H  | 0 | -24.545 | 0.934  | 1.321  |
| H      |      |    |   |         |        |        |
| HETATM | 989  | C  | 0 | -22.774 | 1.774  | 0.853  |
| C      |      |    |   |         |        |        |
| HETATM | 990  | H  | 0 | -23.143 | 2.490  | 0.350  |
| H      |      |    |   |         |        |        |
| HETATM | 991  | C  | 0 | -21.363 | 1.673  | 1.000  |
| C      |      |    |   |         |        |        |
| HETATM | 992  | C  | 0 | -20.484 | 2.611  | 0.429  |
| C      |      |    |   |         |        |        |
| HETATM | 993  | H  | 0 | -20.838 | 3.331  | -0.080 |
| H      |      |    |   |         |        |        |
| HETATM | 994  | C  | 0 | -13.783 | 3.699  | -2.662 |
| C      |      |    |   |         |        |        |
| HETATM | 995  | Fe | 0 | -18.380 | -6.240 | -0.757 |
| Fe     |      |    |   |         |        |        |
| HETATM | 996  | S  | 0 | -14.117 | -5.447 | 0.057  |
| S      |      |    |   |         |        |        |
| HETATM | 997  | S  | 0 | -19.509 | -3.547 | 2.970  |
| S      |      |    |   |         |        |        |
| HETATM | 998  | N  | 0 | -17.518 | -7.455 | 0.613  |
| N      |      |    |   |         |        |        |
| HETATM | 999  | N  | 0 | -16.541 | -5.451 | -0.719 |
| N      |      |    |   |         |        |        |
| HETATM | 1000 | N  | 0 | -15.970 | -4.389 | -1.368 |
| N      |      |    |   |         |        |        |
| HETATM | 1001 | N  | 0 | -18.905 | -5.058 | 0.693  |
| N      |      |    |   |         |        |        |
| HETATM | 1002 | C  | 0 | -18.087 | -8.433 | 1.303  |
| C      |      |    |   |         |        |        |
| HETATM | 1003 | H  | 0 | -19.017 | -8.592 | 1.190  |
| H      |      |    |   |         |        |        |
| HETATM | 1004 | C  | 0 | -17.374 | -9.233 | 2.185  |
| C      |      |    |   |         |        |        |
| HETATM | 1005 | H  | 0 | -17.814 | -9.939 | 2.646  |
| H      |      |    |   |         |        |        |
| HETATM | 1006 | C  | 0 | -16.040 | -9.007 | 2.397  |
| C      |      |    |   |         |        |        |
| HETATM | 1007 | H  | 0 | -15.545 | -9.551 | 2.997  |
| H      |      |    |   |         |        |        |
| HETATM | 1008 | C  | 0 | -15.431 | -7.970 | 1.715  |
| C      |      |    |   |         |        |        |

|             |   |   |         |        |        |
|-------------|---|---|---------|--------|--------|
| HETATM 1009 | H | 0 | -14.511 | -7.778 | 1.848  |
| H           |   |   |         |        |        |
| HETATM 1010 | C | 0 | -16.192 | -7.212 | 0.832  |
| C           |   |   |         |        |        |
| HETATM 1011 | C | 0 | -15.709 | -6.090 | 0.063  |
| C           |   |   |         |        |        |
| HETATM 1012 | C | 0 | -14.707 | -4.263 | -1.079 |
| C           |   |   |         |        |        |
| HETATM 1013 | C | 0 | -13.813 | -3.238 | -1.636 |
| C           |   |   |         |        |        |
| HETATM 1014 | C | 0 | -14.337 | -2.166 | -2.393 |
| C           |   |   |         |        |        |
| HETATM 1015 | H | 0 | -15.277 | -2.094 | -2.516 |
| H           |   |   |         |        |        |
| HETATM 1016 | C | 0 | -13.520 | -1.239 | -2.945 |
| C           |   |   |         |        |        |
| HETATM 1017 | H | 0 | -13.895 | -0.521 | -3.442 |
| H           |   |   |         |        |        |
| HETATM 1018 | C | 0 | -12.109 | -1.324 | -2.793 |
| C           |   |   |         |        |        |
| HETATM 1019 | C | 0 | -11.222 | -0.394 | -3.375 |
| C           |   |   |         |        |        |
| HETATM 1020 | H | 0 | -11.569 | 0.329  | -3.883 |
| H           |   |   |         |        |        |
| HETATM 1021 | C | 0 | -9.866  | -0.521 | -3.217 |
| C           |   |   |         |        |        |
| HETATM 1022 | H | 0 | -9.284  | 0.116  | -3.615 |
| H           |   |   |         |        |        |
| HETATM 1023 | C | 0 | -9.327  | -1.587 | -2.467 |
| C           |   |   |         |        |        |
| HETATM 1024 | H | 0 | -8.386  | -1.665 | -2.361 |
| H           |   |   |         |        |        |
| HETATM 1025 | C | 0 | -10.157 | -2.505 | -1.893 |
| C           |   |   |         |        |        |
| HETATM 1026 | H | 0 | -9.788  | -3.220 | -1.391 |
| H           |   |   |         |        |        |
| HETATM 1027 | C | 0 | -11.568 | -2.404 | -2.040 |
| C           |   |   |         |        |        |
| HETATM 1028 | C | 0 | -12.446 | -3.341 | -1.470 |
| C           |   |   |         |        |        |
| HETATM 1029 | H | 0 | -12.093 | -4.061 | -0.960 |
| H           |   |   |         |        |        |
| HETATM 1030 | C | 0 | -19.148 | -4.430 | 1.622  |
| C           |   |   |         |        |        |
| HETATM 1031 | S | 0 | -22.643 | -7.032 | -1.570 |
| S           |   |   |         |        |        |
| HETATM 1032 | S | 0 | -17.251 | -8.933 | -4.482 |
| S           |   |   |         |        |        |
| HETATM 1033 | N | 0 | -19.242 | -5.025 | -2.125 |
| N           |   |   |         |        |        |
| HETATM 1034 | N | 0 | -20.219 | -7.028 | -0.793 |
| N           |   |   |         |        |        |
| HETATM 1035 | N | 0 | -20.790 | -8.090 | -0.144 |
| N           |   |   |         |        |        |
| HETATM 1036 | N | 0 | -17.855 | -7.423 | -2.205 |
| N           |   |   |         |        |        |

|        |      |   |   |         |         |        |
|--------|------|---|---|---------|---------|--------|
| HETATM | 1037 | C | 0 | -18.673 | -4.046  | -2.816 |
| C      |      |   |   |         |         |        |
| HETATM | 1038 | H | 0 | -17.743 | -3.888  | -2.703 |
| H      |      |   |   |         |         |        |
| HETATM | 1039 | C | 0 | -19.386 | -3.246  | -3.698 |
| C      |      |   |   |         |         |        |
| HETATM | 1040 | H | 0 | -18.946 | -2.540  | -4.158 |
| H      |      |   |   |         |         |        |
| HETATM | 1041 | C | 0 | -20.720 | -3.472  | -3.909 |
| C      |      |   |   |         |         |        |
| HETATM | 1042 | H | 0 | -21.216 | -2.928  | -4.509 |
| H      |      |   |   |         |         |        |
| HETATM | 1043 | C | 0 | -21.329 | -4.509  | -3.227 |
| C      |      |   |   |         |         |        |
| HETATM | 1044 | H | 0 | -22.250 | -4.701  | -3.360 |
| H      |      |   |   |         |         |        |
| HETATM | 1045 | C | 0 | -20.568 | -5.267  | -2.345 |
| C      |      |   |   |         |         |        |
| HETATM | 1046 | C | 0 | -21.051 | -6.389  | -1.575 |
| C      |      |   |   |         |         |        |
| HETATM | 1047 | C | 0 | -22.054 | -8.216  | -0.434 |
| C      |      |   |   |         |         |        |
| HETATM | 1048 | C | 0 | -22.947 | -9.241  | 0.123  |
| C      |      |   |   |         |         |        |
| HETATM | 1049 | C | 0 | -22.423 | -10.314 | 0.881  |
| C      |      |   |   |         |         |        |
| HETATM | 1050 | H | 0 | -21.484 | -10.385 | 1.004  |
| H      |      |   |   |         |         |        |
| HETATM | 1051 | C | 0 | -23.240 | -11.240 | 1.433  |
| C      |      |   |   |         |         |        |
| HETATM | 1052 | H | 0 | -22.866 | -11.958 | 1.930  |
| H      |      |   |   |         |         |        |
| HETATM | 1053 | C | 0 | -24.651 | -11.155 | 1.281  |
| C      |      |   |   |         |         |        |
| HETATM | 1054 | C | 0 | -25.538 | -12.085 | 1.862  |
| C      |      |   |   |         |         |        |
| HETATM | 1055 | H | 0 | -25.191 | -12.809 | 2.371  |
| H      |      |   |   |         |         |        |
| HETATM | 1056 | C | 0 | -26.895 | -11.959 | 1.704  |
| C      |      |   |   |         |         |        |
| HETATM | 1057 | H | 0 | -27.476 | -12.596 | 2.103  |
| H      |      |   |   |         |         |        |
| HETATM | 1058 | C | 0 | -27.433 | -10.893 | 0.955  |
| C      |      |   |   |         |         |        |
| HETATM | 1059 | H | 0 | -28.374 | -10.815 | 0.850  |
| H      |      |   |   |         |         |        |
| HETATM | 1060 | C | 0 | -26.604 | -9.974  | 0.381  |
| C      |      |   |   |         |         |        |
| HETATM | 1061 | H | 0 | -26.973 | -9.259  | -0.121 |
| H      |      |   |   |         |         |        |
| HETATM | 1062 | C | 0 | -25.192 | -10.075 | 0.528  |
| C      |      |   |   |         |         |        |
| HETATM | 1063 | C | 0 | -24.314 | -9.138  | -0.042 |
| C      |      |   |   |         |         |        |
| HETATM | 1064 | H | 0 | -24.668 | -8.418  | -0.552 |
| H      |      |   |   |         |         |        |



```

HETATM 1065  C          0    -17.614  -8.050  -3.134
C
END
CONNECT  1    7    42
CONNECT  2   17   18
CONNECT  3   36
CONNECT  4    8   16
CONNECT  5    6   17
CONNECT  6    5   18
CONNECT  7    1   36
CONNECT  8    4    9   10
CONNECT  9    8
CONNECT 10    8   11   12
CONNECT 11   10
CONNECT 12   10   13   14
CONNECT 13   12
CONNECT 14   12   15   16
CONNECT 15   14
CONNECT 16    4   14   17
CONNECT 17    5   16    2
CONNECT 18    6    2   19
CONNECT 19   18   20   34
CONNECT 20   19   21   22
CONNECT 21   20
CONNECT 22   20   23   24
CONNECT 23   22
CONNECT 24   22   25   33
CONNECT 25   24   26   27
CONNECT 26   25
CONNECT 27   25   28   29
CONNECT 28   27
CONNECT 29   27   30   31
CONNECT 30   29
CONNECT 31   29   32   33
CONNECT 32   31
CONNECT 33   24   31   34
CONNECT 34   19   33   35
CONNECT 35   34
CONNECT 36    3    7
CONNECT 37   52   53
CONNECT 38   71
CONNECT 39   43   51
CONNECT 40   41   52
CONNECT 41   40   53
CONNECT 42    1   71
CONNECT 43   39   44   45
CONNECT 44   43
CONNECT 45   43   46   47
CONNECT 46   45
CONNECT 47   45   48   49
CONNECT 48   47
CONNECT 49   47   50   51
CONNECT 50   49
CONNECT 51   49   39   52
CONNECT 52   37   40   51
CONNECT 53   37   41   54
CONNECT 54   53   55   69

```

|         |     |     |     |     |
|---------|-----|-----|-----|-----|
| CONNECT | 55  | 54  | 56  | 57  |
| CONNECT | 56  | 55  |     |     |
| CONNECT | 57  | 55  | 58  | 59  |
| CONNECT | 58  | 57  |     |     |
| CONNECT | 59  | 57  | 60  | 68  |
| CONNECT | 60  | 59  | 61  | 62  |
| CONNECT | 61  | 60  |     |     |
| CONNECT | 62  | 60  | 63  | 64  |
| CONNECT | 63  | 62  |     |     |
| CONNECT | 64  | 62  | 65  | 66  |
| CONNECT | 65  | 64  |     |     |
| CONNECT | 66  | 64  | 67  | 68  |
| CONNECT | 67  | 66  |     |     |
| CONNECT | 68  | 66  | 59  | 69  |
| CONNECT | 69  | 68  | 54  | 70  |
| CONNECT | 70  | 69  |     |     |
| CONNECT | 71  | 38  | 42  |     |
| CONNECT | 72  | 78  | 113 |     |
| CONNECT | 73  | 88  | 89  |     |
| CONNECT | 74  | 107 |     |     |
| CONNECT | 75  | 79  | 87  |     |
| CONNECT | 76  | 77  | 88  |     |
| CONNECT | 77  | 76  | 89  |     |
| CONNECT | 78  | 72  | 107 |     |
| CONNECT | 79  | 75  | 80  | 81  |
| CONNECT | 80  | 79  |     |     |
| CONNECT | 81  | 79  | 82  | 83  |
| CONNECT | 82  | 81  |     |     |
| CONNECT | 83  | 81  | 84  | 85  |
| CONNECT | 84  | 83  |     |     |
| CONNECT | 85  | 83  | 86  | 87  |
| CONNECT | 86  | 85  |     |     |
| CONNECT | 87  | 75  | 85  | 88  |
| CONNECT | 88  | 76  | 73  | 87  |
| CONNECT | 89  | 73  | 77  | 90  |
| CONNECT | 90  | 89  | 91  | 105 |
| CONNECT | 91  | 90  | 92  | 93  |
| CONNECT | 92  | 91  |     |     |
| CONNECT | 93  | 91  | 94  | 95  |
| CONNECT | 94  | 93  |     |     |
| CONNECT | 95  | 93  | 96  | 104 |
| CONNECT | 96  | 95  | 97  | 98  |
| CONNECT | 97  | 96  |     |     |
| CONNECT | 98  | 96  | 99  | 100 |
| CONNECT | 99  | 98  |     |     |
| CONNECT | 100 | 98  | 101 | 102 |
| CONNECT | 101 | 100 |     |     |
| CONNECT | 102 | 100 | 103 | 104 |
| CONNECT | 103 | 102 |     |     |
| CONNECT | 104 | 95  | 102 | 105 |
| CONNECT | 105 | 90  | 104 | 106 |
| CONNECT | 106 | 105 |     |     |
| CONNECT | 107 | 78  | 74  |     |
| CONNECT | 108 | 123 | 124 |     |
| CONNECT | 109 | 142 |     |     |
| CONNECT | 110 | 114 | 122 |     |
| CONNECT | 111 | 112 | 123 |     |

|        |     |     |     |     |
|--------|-----|-----|-----|-----|
| CONECT | 112 | 111 | 124 |     |
| CONECT | 113 | 72  | 142 |     |
| CONECT | 114 | 110 | 115 | 116 |
| CONECT | 115 | 114 |     |     |
| CONECT | 116 | 114 | 117 | 118 |
| CONECT | 117 | 116 |     |     |
| CONECT | 118 | 116 | 119 | 120 |
| CONECT | 119 | 118 |     |     |
| CONECT | 120 | 118 | 121 | 122 |
| CONECT | 121 | 120 |     |     |
| CONECT | 122 | 120 | 110 | 123 |
| CONECT | 123 | 108 | 111 | 122 |
| CONECT | 124 | 108 | 112 | 125 |
| CONECT | 125 | 124 | 126 | 140 |
| CONECT | 126 | 125 | 127 | 128 |
| CONECT | 127 | 126 |     |     |
| CONECT | 128 | 126 | 129 | 130 |
| CONECT | 129 | 128 |     |     |
| CONECT | 130 | 128 | 131 | 139 |
| CONECT | 131 | 130 | 132 | 133 |
| CONECT | 132 | 131 |     |     |
| CONECT | 133 | 131 | 134 | 135 |
| CONECT | 134 | 133 |     |     |
| CONECT | 135 | 133 | 136 | 137 |
| CONECT | 136 | 135 |     |     |
| CONECT | 137 | 135 | 138 | 139 |
| CONECT | 138 | 137 |     |     |
| CONECT | 139 | 130 | 137 | 140 |
| CONECT | 140 | 139 | 125 | 141 |
| CONECT | 141 | 140 |     |     |
| CONECT | 142 | 109 | 113 |     |
| CONECT | 143 | 149 | 184 |     |
| CONECT | 144 | 159 | 160 |     |
| CONECT | 145 | 178 |     |     |
| CONECT | 146 | 150 | 158 |     |
| CONECT | 147 | 148 | 159 |     |
| CONECT | 148 | 147 | 160 |     |
| CONECT | 149 | 143 | 178 |     |
| CONECT | 150 | 146 | 151 | 152 |
| CONECT | 151 | 150 |     |     |
| CONECT | 152 | 150 | 153 | 154 |
| CONECT | 153 | 152 |     |     |
| CONECT | 154 | 152 | 155 | 156 |
| CONECT | 155 | 154 |     |     |
| CONECT | 156 | 154 | 157 | 158 |
| CONECT | 157 | 156 |     |     |
| CONECT | 158 | 146 | 156 | 159 |
| CONECT | 159 | 144 | 147 | 158 |
| CONECT | 160 | 144 | 148 | 161 |
| CONECT | 161 | 160 | 162 | 176 |
| CONECT | 162 | 161 | 163 | 164 |
| CONECT | 163 | 162 |     |     |
| CONECT | 164 | 162 | 165 | 166 |
| CONECT | 165 | 164 |     |     |
| CONECT | 166 | 164 | 167 | 175 |
| CONECT | 167 | 166 | 168 | 169 |
| CONECT | 168 | 167 |     |     |

|        |     |     |     |     |
|--------|-----|-----|-----|-----|
| CONECT | 169 | 167 | 170 | 171 |
| CONECT | 170 | 169 |     |     |
| CONECT | 171 | 169 | 172 | 173 |
| CONECT | 172 | 171 |     |     |
| CONECT | 173 | 171 | 174 | 175 |
| CONECT | 174 | 173 |     |     |
| CONECT | 175 | 166 | 173 | 176 |
| CONECT | 176 | 161 | 175 | 177 |
| CONECT | 177 | 176 |     |     |
| CONECT | 178 | 149 | 145 |     |
| CONECT | 179 | 194 | 195 |     |
| CONECT | 180 | 213 |     |     |
| CONECT | 181 | 185 | 193 |     |
| CONECT | 182 | 183 | 194 |     |
| CONECT | 183 | 182 | 195 |     |
| CONECT | 184 | 143 | 213 |     |
| CONECT | 185 | 181 | 186 | 187 |
| CONECT | 186 | 185 |     |     |
| CONECT | 187 | 185 | 188 | 189 |
| CONECT | 188 | 187 |     |     |
| CONECT | 189 | 187 | 190 | 191 |
| CONECT | 190 | 189 |     |     |
| CONECT | 191 | 189 | 192 | 193 |
| CONECT | 192 | 191 |     |     |
| CONECT | 193 | 181 | 191 | 194 |
| CONECT | 194 | 193 | 179 | 182 |
| CONECT | 195 | 179 | 183 | 196 |
| CONECT | 196 | 195 | 197 | 211 |
| CONECT | 197 | 196 | 198 | 199 |
| CONECT | 198 | 197 |     |     |
| CONECT | 199 | 197 | 200 | 201 |
| CONECT | 200 | 199 |     |     |
| CONECT | 201 | 199 | 202 | 210 |
| CONECT | 202 | 201 | 203 | 204 |
| CONECT | 203 | 202 |     |     |
| CONECT | 204 | 202 | 205 | 206 |
| CONECT | 205 | 204 |     |     |
| CONECT | 206 | 204 | 207 | 208 |
| CONECT | 207 | 206 |     |     |
| CONECT | 208 | 206 | 209 | 210 |
| CONECT | 209 | 208 |     |     |
| CONECT | 210 | 201 | 208 | 211 |
| CONECT | 211 | 210 | 196 | 212 |
| CONECT | 212 | 211 |     |     |
| CONECT | 213 | 180 | 184 |     |
| CONECT | 214 | 220 | 255 |     |
| CONECT | 215 | 230 | 231 |     |
| CONECT | 216 | 249 |     |     |
| CONECT | 217 | 221 | 229 |     |
| CONECT | 218 | 219 | 230 |     |
| CONECT | 219 | 218 | 231 |     |
| CONECT | 220 | 214 | 249 |     |
| CONECT | 221 | 217 | 222 | 223 |
| CONECT | 222 | 221 |     |     |
| CONECT | 223 | 221 | 224 | 225 |
| CONECT | 224 | 223 |     |     |
| CONECT | 225 | 223 | 226 | 227 |

|         |     |     |     |     |
|---------|-----|-----|-----|-----|
| CONNECT | 226 | 225 |     |     |
| CONNECT | 227 | 225 | 228 | 229 |
| CONNECT | 228 | 227 |     |     |
| CONNECT | 229 | 217 | 227 | 230 |
| CONNECT | 230 | 229 | 215 | 218 |
| CONNECT | 231 | 215 | 219 | 232 |
| CONNECT | 232 | 231 | 233 | 247 |
| CONNECT | 233 | 232 | 234 | 235 |
| CONNECT | 234 | 233 |     |     |
| CONNECT | 235 | 233 | 236 | 237 |
| CONNECT | 236 | 235 |     |     |
| CONNECT | 237 | 235 | 238 | 246 |
| CONNECT | 238 | 237 | 239 | 240 |
| CONNECT | 239 | 238 |     |     |
| CONNECT | 240 | 238 | 241 | 242 |
| CONNECT | 241 | 240 |     |     |
| CONNECT | 242 | 240 | 243 | 244 |
| CONNECT | 243 | 242 |     |     |
| CONNECT | 244 | 242 | 245 | 246 |
| CONNECT | 245 | 244 |     |     |
| CONNECT | 246 | 237 | 244 | 247 |
| CONNECT | 247 | 232 | 246 | 248 |
| CONNECT | 248 | 247 |     |     |
| CONNECT | 249 | 216 | 220 |     |
| CONNECT | 250 | 265 | 266 |     |
| CONNECT | 251 | 284 |     |     |
| CONNECT | 252 | 256 | 264 |     |
| CONNECT | 253 | 254 | 265 |     |
| CONNECT | 254 | 253 | 266 |     |
| CONNECT | 255 | 214 | 284 |     |
| CONNECT | 256 | 252 | 257 | 258 |
| CONNECT | 257 | 256 |     |     |
| CONNECT | 258 | 256 | 259 | 260 |
| CONNECT | 259 | 258 |     |     |
| CONNECT | 260 | 258 | 261 | 262 |
| CONNECT | 261 | 260 |     |     |
| CONNECT | 262 | 260 | 263 | 264 |
| CONNECT | 263 | 262 |     |     |
| CONNECT | 264 | 262 | 252 | 265 |
| CONNECT | 265 | 250 | 253 | 264 |
| CONNECT | 266 | 250 | 254 | 267 |
| CONNECT | 267 | 266 | 268 | 282 |
| CONNECT | 268 | 267 | 269 | 270 |
| CONNECT | 269 | 268 |     |     |
| CONNECT | 270 | 268 | 271 | 272 |
| CONNECT | 271 | 270 |     |     |
| CONNECT | 272 | 270 | 273 | 281 |
| CONNECT | 273 | 272 | 274 | 275 |
| CONNECT | 274 | 273 |     |     |
| CONNECT | 275 | 273 | 276 | 277 |
| CONNECT | 276 | 275 |     |     |
| CONNECT | 277 | 275 | 278 | 279 |
| CONNECT | 278 | 277 |     |     |
| CONNECT | 279 | 277 | 280 | 281 |
| CONNECT | 280 | 279 |     |     |
| CONNECT | 281 | 279 | 272 | 282 |
| CONNECT | 282 | 281 | 267 | 283 |

|         |     |     |     |     |
|---------|-----|-----|-----|-----|
| CONNECT | 283 | 282 |     |     |
| CONNECT | 284 | 251 | 255 |     |
| CONNECT | 285 | 291 | 326 |     |
| CONNECT | 286 | 301 | 302 |     |
| CONNECT | 287 | 320 |     |     |
| CONNECT | 288 | 292 | 300 |     |
| CONNECT | 289 | 290 | 301 |     |
| CONNECT | 290 | 289 | 302 |     |
| CONNECT | 291 | 285 | 320 |     |
| CONNECT | 292 | 288 | 293 | 294 |
| CONNECT | 293 | 292 |     |     |
| CONNECT | 294 | 292 | 295 | 296 |
| CONNECT | 295 | 294 |     |     |
| CONNECT | 296 | 294 | 297 | 298 |
| CONNECT | 297 | 296 |     |     |
| CONNECT | 298 | 296 | 299 | 300 |
| CONNECT | 299 | 298 |     |     |
| CONNECT | 300 | 288 | 298 | 301 |
| CONNECT | 301 | 300 | 289 | 286 |
| CONNECT | 302 | 290 | 286 | 303 |
| CONNECT | 303 | 302 | 304 | 318 |
| CONNECT | 304 | 303 | 305 | 306 |
| CONNECT | 305 | 304 |     |     |
| CONNECT | 306 | 304 | 307 | 308 |
| CONNECT | 307 | 306 |     |     |
| CONNECT | 308 | 306 | 309 | 317 |
| CONNECT | 309 | 308 | 310 | 311 |
| CONNECT | 310 | 309 |     |     |
| CONNECT | 311 | 309 | 312 | 313 |
| CONNECT | 312 | 311 |     |     |
| CONNECT | 313 | 311 | 314 | 315 |
| CONNECT | 314 | 313 |     |     |
| CONNECT | 315 | 313 | 316 | 317 |
| CONNECT | 316 | 315 |     |     |
| CONNECT | 317 | 308 | 315 | 318 |
| CONNECT | 318 | 303 | 317 | 319 |
| CONNECT | 319 | 318 |     |     |
| CONNECT | 320 | 287 | 291 |     |
| CONNECT | 321 | 336 | 337 |     |
| CONNECT | 322 | 355 |     |     |
| CONNECT | 323 | 327 | 335 |     |
| CONNECT | 324 | 325 | 336 |     |
| CONNECT | 325 | 324 | 337 |     |
| CONNECT | 326 | 285 | 355 |     |
| CONNECT | 327 | 323 | 328 | 329 |
| CONNECT | 328 | 327 |     |     |
| CONNECT | 329 | 327 | 330 | 331 |
| CONNECT | 330 | 329 |     |     |
| CONNECT | 331 | 329 | 332 | 333 |
| CONNECT | 332 | 331 |     |     |
| CONNECT | 333 | 331 | 334 | 335 |
| CONNECT | 334 | 333 |     |     |
| CONNECT | 335 | 333 | 323 | 336 |
| CONNECT | 336 | 321 | 324 | 335 |
| CONNECT | 337 | 321 | 325 | 338 |
| CONNECT | 338 | 337 | 339 | 353 |
| CONNECT | 339 | 338 | 340 | 341 |

|         |     |     |     |     |
|---------|-----|-----|-----|-----|
| CONNECT | 340 | 339 |     |     |
| CONNECT | 341 | 339 | 342 | 343 |
| CONNECT | 342 | 341 |     |     |
| CONNECT | 343 | 341 | 344 | 352 |
| CONNECT | 344 | 343 | 345 | 346 |
| CONNECT | 345 | 344 |     |     |
| CONNECT | 346 | 344 | 347 | 348 |
| CONNECT | 347 | 346 |     |     |
| CONNECT | 348 | 346 | 349 | 350 |
| CONNECT | 349 | 348 |     |     |
| CONNECT | 350 | 348 | 351 | 352 |
| CONNECT | 351 | 350 |     |     |
| CONNECT | 352 | 343 | 350 | 353 |
| CONNECT | 353 | 338 | 352 | 354 |
| CONNECT | 354 | 353 |     |     |
| CONNECT | 355 | 322 | 326 |     |
| CONNECT | 356 | 362 | 397 |     |
| CONNECT | 357 | 372 | 373 |     |
| CONNECT | 358 | 391 |     |     |
| CONNECT | 359 | 363 | 371 |     |
| CONNECT | 360 | 361 | 372 |     |
| CONNECT | 361 | 360 | 373 |     |
| CONNECT | 362 | 356 | 391 |     |
| CONNECT | 363 | 359 | 364 | 365 |
| CONNECT | 364 | 363 |     |     |
| CONNECT | 365 | 363 | 366 | 367 |
| CONNECT | 366 | 365 |     |     |
| CONNECT | 367 | 365 | 368 | 369 |
| CONNECT | 368 | 367 |     |     |
| CONNECT | 369 | 367 | 370 | 371 |
| CONNECT | 370 | 369 |     |     |
| CONNECT | 371 | 359 | 369 | 372 |
| CONNECT | 372 | 371 | 357 | 360 |
| CONNECT | 373 | 357 | 361 | 374 |
| CONNECT | 374 | 373 | 375 | 389 |
| CONNECT | 375 | 374 | 376 | 377 |
| CONNECT | 376 | 375 |     |     |
| CONNECT | 377 | 375 | 378 | 379 |
| CONNECT | 378 | 377 |     |     |
| CONNECT | 379 | 377 | 380 | 388 |
| CONNECT | 380 | 379 | 381 | 382 |
| CONNECT | 381 | 380 |     |     |
| CONNECT | 382 | 380 | 383 | 384 |
| CONNECT | 383 | 382 |     |     |
| CONNECT | 384 | 382 | 385 | 386 |
| CONNECT | 385 | 384 |     |     |
| CONNECT | 386 | 384 | 387 | 388 |
| CONNECT | 387 | 386 |     |     |
| CONNECT | 388 | 379 | 386 | 389 |
| CONNECT | 389 | 388 | 374 | 390 |
| CONNECT | 390 | 389 |     |     |
| CONNECT | 391 | 358 | 362 |     |
| CONNECT | 392 | 407 | 408 |     |
| CONNECT | 393 | 426 |     |     |
| CONNECT | 394 | 398 | 406 |     |
| CONNECT | 395 | 396 | 407 |     |
| CONNECT | 396 | 395 | 408 |     |

|         |     |     |     |     |
|---------|-----|-----|-----|-----|
| CONNECT | 397 | 356 | 426 |     |
| CONNECT | 398 | 394 | 399 | 400 |
| CONNECT | 399 | 398 |     |     |
| CONNECT | 400 | 398 | 401 | 402 |
| CONNECT | 401 | 400 |     |     |
| CONNECT | 402 | 400 | 403 | 404 |
| CONNECT | 403 | 402 |     |     |
| CONNECT | 404 | 402 | 405 | 406 |
| CONNECT | 405 | 404 |     |     |
| CONNECT | 406 | 394 | 404 | 407 |
| CONNECT | 407 | 392 | 395 | 406 |
| CONNECT | 408 | 392 | 396 | 409 |
| CONNECT | 409 | 408 | 410 | 424 |
| CONNECT | 410 | 409 | 411 | 412 |
| CONNECT | 411 | 410 |     |     |
| CONNECT | 412 | 410 | 413 | 414 |
| CONNECT | 413 | 412 |     |     |
| CONNECT | 414 | 412 | 415 | 423 |
| CONNECT | 415 | 414 | 416 | 417 |
| CONNECT | 416 | 415 |     |     |
| CONNECT | 417 | 415 | 418 | 419 |
| CONNECT | 418 | 417 |     |     |
| CONNECT | 419 | 417 | 420 | 421 |
| CONNECT | 420 | 419 |     |     |
| CONNECT | 421 | 419 | 422 | 423 |
| CONNECT | 422 | 421 |     |     |
| CONNECT | 423 | 414 | 421 | 424 |
| CONNECT | 424 | 423 | 409 | 425 |
| CONNECT | 425 | 424 |     |     |
| CONNECT | 426 | 393 | 397 |     |
| CONNECT | 427 | 433 | 468 |     |
| CONNECT | 428 | 443 | 444 |     |
| CONNECT | 429 | 462 |     |     |
| CONNECT | 430 | 434 | 442 |     |
| CONNECT | 431 | 432 | 443 |     |
| CONNECT | 432 | 431 | 444 |     |
| CONNECT | 433 | 427 | 462 |     |
| CONNECT | 434 | 430 | 435 | 436 |
| CONNECT | 435 | 434 |     |     |
| CONNECT | 436 | 434 | 437 | 438 |
| CONNECT | 437 | 436 |     |     |
| CONNECT | 438 | 436 | 439 | 440 |
| CONNECT | 439 | 438 |     |     |
| CONNECT | 440 | 438 | 441 | 442 |
| CONNECT | 441 | 440 |     |     |
| CONNECT | 442 | 430 | 440 | 443 |
| CONNECT | 443 | 428 | 431 | 442 |
| CONNECT | 444 | 428 | 432 | 445 |
| CONNECT | 445 | 444 | 446 | 460 |
| CONNECT | 446 | 445 | 447 | 448 |
| CONNECT | 447 | 446 |     |     |
| CONNECT | 448 | 446 | 449 | 450 |
| CONNECT | 449 | 448 |     |     |
| CONNECT | 450 | 448 | 451 | 459 |
| CONNECT | 451 | 450 | 452 | 453 |
| CONNECT | 452 | 451 |     |     |
| CONNECT | 453 | 451 | 454 | 455 |



|        |     |     |     |     |
|--------|-----|-----|-----|-----|
| CONECT | 454 | 453 |     |     |
| CONECT | 455 | 453 | 456 | 457 |
| CONECT | 456 | 455 |     |     |
| CONECT | 457 | 455 | 458 | 459 |
| CONECT | 458 | 457 |     |     |
| CONECT | 459 | 450 | 457 | 460 |
| CONECT | 460 | 445 | 459 | 461 |
| CONECT | 461 | 460 |     |     |
| CONECT | 462 | 429 | 433 |     |
| CONECT | 463 | 478 | 479 |     |
| CONECT | 464 | 497 |     |     |
| CONECT | 465 | 469 | 477 |     |
| CONECT | 466 | 467 | 478 |     |
| CONECT | 467 | 466 | 479 |     |
| CONECT | 468 | 427 | 497 |     |
| CONECT | 469 | 465 | 470 | 471 |
| CONECT | 470 | 469 |     |     |
| CONECT | 471 | 469 | 472 | 473 |
| CONECT | 472 | 471 |     |     |
| CONECT | 473 | 471 | 474 | 475 |
| CONECT | 474 | 473 |     |     |
| CONECT | 475 | 473 | 476 | 477 |
| CONECT | 476 | 475 |     |     |
| CONECT | 477 | 475 | 465 | 478 |
| CONECT | 478 | 463 | 466 | 477 |
| CONECT | 479 | 463 | 467 | 480 |
| CONECT | 480 | 479 | 481 | 495 |
| CONECT | 481 | 480 | 482 | 483 |
| CONECT | 482 | 481 |     |     |
| CONECT | 483 | 481 | 484 | 485 |
| CONECT | 484 | 483 |     |     |
| CONECT | 485 | 483 | 486 | 494 |
| CONECT | 486 | 485 | 487 | 488 |
| CONECT | 487 | 486 |     |     |
| CONECT | 488 | 486 | 489 | 490 |
| CONECT | 489 | 488 |     |     |
| CONECT | 490 | 488 | 491 | 492 |
| CONECT | 491 | 490 |     |     |
| CONECT | 492 | 490 | 493 | 494 |
| CONECT | 493 | 492 |     |     |
| CONECT | 494 | 485 | 492 | 495 |
| CONECT | 495 | 494 | 480 | 496 |
| CONECT | 496 | 495 |     |     |
| CONECT | 497 | 468 | 464 |     |
| CONECT | 498 | 504 | 539 |     |
| CONECT | 499 | 514 | 515 |     |
| CONECT | 500 | 533 |     |     |
| CONECT | 501 | 505 | 513 |     |
| CONECT | 502 | 503 | 514 |     |
| CONECT | 503 | 502 | 515 |     |
| CONECT | 504 | 498 | 533 |     |
| CONECT | 505 | 501 | 506 | 507 |
| CONECT | 506 | 505 |     |     |
| CONECT | 507 | 505 | 508 | 509 |
| CONECT | 508 | 507 |     |     |
| CONECT | 509 | 507 | 510 | 511 |
| CONECT | 510 | 509 |     |     |

|        |     |     |     |     |
|--------|-----|-----|-----|-----|
| CONECT | 511 | 509 | 512 | 513 |
| CONECT | 512 | 511 |     |     |
| CONECT | 513 | 501 | 511 | 514 |
| CONECT | 514 | 499 | 502 | 513 |
| CONECT | 515 | 499 | 503 | 516 |
| CONECT | 516 | 515 | 517 | 531 |
| CONECT | 517 | 516 | 518 | 519 |
| CONECT | 518 | 517 |     |     |
| CONECT | 519 | 517 | 520 | 521 |
| CONECT | 520 | 519 |     |     |
| CONECT | 521 | 519 | 522 | 530 |
| CONECT | 522 | 521 | 523 | 524 |
| CONECT | 523 | 522 |     |     |
| CONECT | 524 | 522 | 525 | 526 |
| CONECT | 525 | 524 |     |     |
| CONECT | 526 | 524 | 527 | 528 |
| CONECT | 527 | 526 |     |     |
| CONECT | 528 | 526 | 529 | 530 |
| CONECT | 529 | 528 |     |     |
| CONECT | 530 | 521 | 528 | 531 |
| CONECT | 531 | 516 | 530 | 532 |
| CONECT | 532 | 531 |     |     |
| CONECT | 533 | 500 | 504 |     |
| CONECT | 534 | 549 | 550 |     |
| CONECT | 535 | 568 |     |     |
| CONECT | 536 | 540 | 548 |     |
| CONECT | 537 | 538 | 549 |     |
| CONECT | 538 | 537 | 550 |     |
| CONECT | 539 | 498 | 568 |     |
| CONECT | 540 | 536 | 541 | 542 |
| CONECT | 541 | 540 |     |     |
| CONECT | 542 | 540 | 543 | 544 |
| CONECT | 543 | 542 |     |     |
| CONECT | 544 | 542 | 545 | 546 |
| CONECT | 545 | 544 |     |     |
| CONECT | 546 | 544 | 547 | 548 |
| CONECT | 547 | 546 |     |     |
| CONECT | 548 | 546 | 536 | 549 |
| CONECT | 549 | 548 | 534 | 537 |
| CONECT | 550 | 534 | 538 | 551 |
| CONECT | 551 | 550 | 552 | 566 |
| CONECT | 552 | 551 | 553 | 554 |
| CONECT | 553 | 552 |     |     |
| CONECT | 554 | 552 | 555 | 556 |
| CONECT | 555 | 554 |     |     |
| CONECT | 556 | 554 | 557 | 565 |
| CONECT | 557 | 556 | 558 | 559 |
| CONECT | 558 | 557 |     |     |
| CONECT | 559 | 557 | 560 | 561 |
| CONECT | 560 | 559 |     |     |
| CONECT | 561 | 559 | 562 | 563 |
| CONECT | 562 | 561 |     |     |
| CONECT | 563 | 561 | 564 | 565 |
| CONECT | 564 | 563 |     |     |
| CONECT | 565 | 563 | 556 | 566 |
| CONECT | 566 | 551 | 565 | 567 |
| CONECT | 567 | 566 |     |     |

|        |     |     |     |     |
|--------|-----|-----|-----|-----|
| CONECT | 568 | 535 | 539 |     |
| CONECT | 569 | 575 | 610 |     |
| CONECT | 570 | 585 | 586 |     |
| CONECT | 571 | 604 |     |     |
| CONECT | 572 | 576 | 584 |     |
| CONECT | 573 | 574 | 585 |     |
| CONECT | 574 | 573 | 586 |     |
| CONECT | 575 | 569 | 604 |     |
| CONECT | 576 | 572 | 577 | 578 |
| CONECT | 577 | 576 |     |     |
| CONECT | 578 | 576 | 579 | 580 |
| CONECT | 579 | 578 |     |     |
| CONECT | 580 | 578 | 581 | 582 |
| CONECT | 581 | 580 |     |     |
| CONECT | 582 | 580 | 583 | 584 |
| CONECT | 583 | 582 |     |     |
| CONECT | 584 | 572 | 582 | 585 |
| CONECT | 585 | 573 | 584 | 570 |
| CONECT | 586 | 574 | 570 | 587 |
| CONECT | 587 | 586 | 588 | 602 |
| CONECT | 588 | 587 | 589 | 590 |
| CONECT | 589 | 588 |     |     |
| CONECT | 590 | 588 | 591 | 592 |
| CONECT | 591 | 590 |     |     |
| CONECT | 592 | 590 | 593 | 601 |
| CONECT | 593 | 592 | 594 | 595 |
| CONECT | 594 | 593 |     |     |
| CONECT | 595 | 593 | 596 | 597 |
| CONECT | 596 | 595 |     |     |
| CONECT | 597 | 595 | 598 | 599 |
| CONECT | 598 | 597 |     |     |
| CONECT | 599 | 597 | 600 | 601 |
| CONECT | 600 | 599 |     |     |
| CONECT | 601 | 592 | 599 | 602 |
| CONECT | 602 | 601 | 587 | 603 |
| CONECT | 603 | 602 |     |     |
| CONECT | 604 | 571 | 575 |     |
| CONECT | 605 | 620 | 621 |     |
| CONECT | 606 | 639 |     |     |
| CONECT | 607 | 611 | 619 |     |
| CONECT | 608 | 609 | 620 |     |
| CONECT | 609 | 608 | 621 |     |
| CONECT | 610 | 569 | 639 |     |
| CONECT | 611 | 607 | 612 | 613 |
| CONECT | 612 | 611 |     |     |
| CONECT | 613 | 611 | 614 | 615 |
| CONECT | 614 | 613 |     |     |
| CONECT | 615 | 613 | 616 | 617 |
| CONECT | 616 | 615 |     |     |
| CONECT | 617 | 615 | 618 | 619 |
| CONECT | 618 | 617 |     |     |
| CONECT | 619 | 607 | 617 | 620 |
| CONECT | 620 | 605 | 619 | 608 |
| CONECT | 621 | 605 | 609 | 622 |
| CONECT | 622 | 621 | 623 | 637 |
| CONECT | 623 | 622 | 624 | 625 |
| CONECT | 624 | 623 |     |     |

|         |     |     |     |     |
|---------|-----|-----|-----|-----|
| CONNECT | 625 | 623 | 626 | 627 |
| CONNECT | 626 | 625 |     |     |
| CONNECT | 627 | 625 | 628 | 636 |
| CONNECT | 628 | 627 | 629 | 630 |
| CONNECT | 629 | 628 |     |     |
| CONNECT | 630 | 628 | 631 | 632 |
| CONNECT | 631 | 630 |     |     |
| CONNECT | 632 | 630 | 633 | 634 |
| CONNECT | 633 | 632 |     |     |
| CONNECT | 634 | 632 | 635 | 636 |
| CONNECT | 635 | 634 |     |     |
| CONNECT | 636 | 627 | 634 | 637 |
| CONNECT | 637 | 636 | 622 | 638 |
| CONNECT | 638 | 637 |     |     |
| CONNECT | 639 | 606 | 610 |     |
| CONNECT | 640 | 646 | 681 |     |
| CONNECT | 641 | 656 | 657 |     |
| CONNECT | 642 | 675 |     |     |
| CONNECT | 643 | 647 | 655 |     |
| CONNECT | 644 | 645 | 656 |     |
| CONNECT | 645 | 644 | 657 |     |
| CONNECT | 646 | 640 | 675 |     |
| CONNECT | 647 | 643 | 648 | 649 |
| CONNECT | 648 | 647 |     |     |
| CONNECT | 649 | 647 | 650 | 651 |
| CONNECT | 650 | 649 |     |     |
| CONNECT | 651 | 649 | 652 | 653 |
| CONNECT | 652 | 651 |     |     |
| CONNECT | 653 | 651 | 654 | 655 |
| CONNECT | 654 | 653 |     |     |
| CONNECT | 655 | 643 | 653 | 656 |
| CONNECT | 656 | 644 | 655 | 641 |
| CONNECT | 657 | 641 | 645 | 658 |
| CONNECT | 658 | 657 | 659 | 673 |
| CONNECT | 659 | 658 | 660 | 661 |
| CONNECT | 660 | 659 |     |     |
| CONNECT | 661 | 659 | 662 | 663 |
| CONNECT | 662 | 661 |     |     |
| CONNECT | 663 | 661 | 664 | 672 |
| CONNECT | 664 | 663 | 665 | 666 |
| CONNECT | 665 | 664 |     |     |
| CONNECT | 666 | 664 | 667 | 668 |
| CONNECT | 667 | 666 |     |     |
| CONNECT | 668 | 666 | 669 | 670 |
| CONNECT | 669 | 668 |     |     |
| CONNECT | 670 | 668 | 671 | 672 |
| CONNECT | 671 | 670 |     |     |
| CONNECT | 672 | 663 | 670 | 673 |
| CONNECT | 673 | 658 | 672 | 674 |
| CONNECT | 674 | 673 |     |     |
| CONNECT | 675 | 642 | 646 |     |
| CONNECT | 676 | 691 | 692 |     |
| CONNECT | 677 | 710 |     |     |
| CONNECT | 678 | 682 | 690 |     |
| CONNECT | 679 | 680 | 691 |     |
| CONNECT | 680 | 679 | 692 |     |
| CONNECT | 681 | 640 | 710 |     |

|         |     |     |     |     |
|---------|-----|-----|-----|-----|
| CONNECT | 682 | 678 | 683 | 684 |
| CONNECT | 683 | 682 |     |     |
| CONNECT | 684 | 682 | 685 | 686 |
| CONNECT | 685 | 684 |     |     |
| CONNECT | 686 | 684 | 687 | 688 |
| CONNECT | 687 | 686 |     |     |
| CONNECT | 688 | 686 | 689 | 690 |
| CONNECT | 689 | 688 |     |     |
| CONNECT | 690 | 688 | 678 | 691 |
| CONNECT | 691 | 676 | 679 | 690 |
| CONNECT | 692 | 676 | 680 | 693 |
| CONNECT | 693 | 692 | 694 | 708 |
| CONNECT | 694 | 693 | 695 | 696 |
| CONNECT | 695 | 694 |     |     |
| CONNECT | 696 | 694 | 697 | 698 |
| CONNECT | 697 | 696 |     |     |
| CONNECT | 698 | 696 | 699 | 707 |
| CONNECT | 699 | 698 | 700 | 701 |
| CONNECT | 700 | 699 |     |     |
| CONNECT | 701 | 699 | 702 | 703 |
| CONNECT | 702 | 701 |     |     |
| CONNECT | 703 | 701 | 704 | 705 |
| CONNECT | 704 | 703 |     |     |
| CONNECT | 705 | 703 | 706 | 707 |
| CONNECT | 706 | 705 |     |     |
| CONNECT | 707 | 698 | 705 | 708 |
| CONNECT | 708 | 693 | 707 | 709 |
| CONNECT | 709 | 708 |     |     |
| CONNECT | 710 | 677 | 681 |     |
| CONNECT | 711 | 717 | 752 |     |
| CONNECT | 712 | 727 | 728 |     |
| CONNECT | 713 | 746 |     |     |
| CONNECT | 714 | 718 | 726 |     |
| CONNECT | 715 | 716 | 727 |     |
| CONNECT | 716 | 715 | 728 |     |
| CONNECT | 717 | 711 | 746 |     |
| CONNECT | 718 | 714 | 719 | 720 |
| CONNECT | 719 | 718 |     |     |
| CONNECT | 720 | 718 | 721 | 722 |
| CONNECT | 721 | 720 |     |     |
| CONNECT | 722 | 720 | 723 | 724 |
| CONNECT | 723 | 722 |     |     |
| CONNECT | 724 | 722 | 725 | 726 |
| CONNECT | 725 | 724 |     |     |
| CONNECT | 726 | 714 | 724 | 727 |
| CONNECT | 727 | 726 | 712 | 715 |
| CONNECT | 728 | 712 | 716 | 729 |
| CONNECT | 729 | 728 | 730 | 744 |
| CONNECT | 730 | 729 | 731 | 732 |
| CONNECT | 731 | 730 |     |     |
| CONNECT | 732 | 730 | 733 | 734 |
| CONNECT | 733 | 732 |     |     |
| CONNECT | 734 | 732 | 735 | 743 |
| CONNECT | 735 | 734 | 736 | 737 |
| CONNECT | 736 | 735 |     |     |
| CONNECT | 737 | 735 | 738 | 739 |
| CONNECT | 738 | 737 |     |     |

|         |     |     |     |     |
|---------|-----|-----|-----|-----|
| CONNECT | 739 | 737 | 740 | 741 |
| CONNECT | 740 | 739 |     |     |
| CONNECT | 741 | 739 | 742 | 743 |
| CONNECT | 742 | 741 |     |     |
| CONNECT | 743 | 734 | 741 | 744 |
| CONNECT | 744 | 729 | 743 | 745 |
| CONNECT | 745 | 744 |     |     |
| CONNECT | 746 | 713 | 717 |     |
| CONNECT | 747 | 762 | 763 |     |
| CONNECT | 748 | 781 |     |     |
| CONNECT | 749 | 753 | 761 |     |
| CONNECT | 750 | 751 | 762 |     |
| CONNECT | 751 | 750 | 763 |     |
| CONNECT | 752 | 711 | 781 |     |
| CONNECT | 753 | 749 | 754 | 755 |
| CONNECT | 754 | 753 |     |     |
| CONNECT | 755 | 753 | 756 | 757 |
| CONNECT | 756 | 755 |     |     |
| CONNECT | 757 | 755 | 758 | 759 |
| CONNECT | 758 | 757 |     |     |
| CONNECT | 759 | 757 | 760 | 761 |
| CONNECT | 760 | 759 |     |     |
| CONNECT | 761 | 749 | 759 | 762 |
| CONNECT | 762 | 747 | 750 | 761 |
| CONNECT | 763 | 747 | 751 | 764 |
| CONNECT | 764 | 763 | 765 | 779 |
| CONNECT | 765 | 764 | 766 | 767 |
| CONNECT | 766 | 765 |     |     |
| CONNECT | 767 | 765 | 768 | 769 |
| CONNECT | 768 | 767 |     |     |
| CONNECT | 769 | 767 | 770 | 778 |
| CONNECT | 770 | 769 | 771 | 772 |
| CONNECT | 771 | 770 |     |     |
| CONNECT | 772 | 770 | 773 | 774 |
| CONNECT | 773 | 772 |     |     |
| CONNECT | 774 | 772 | 775 | 776 |
| CONNECT | 775 | 774 |     |     |
| CONNECT | 776 | 774 | 777 | 778 |
| CONNECT | 777 | 776 |     |     |
| CONNECT | 778 | 769 | 776 | 779 |
| CONNECT | 779 | 778 | 764 | 780 |
| CONNECT | 780 | 779 |     |     |
| CONNECT | 781 | 748 | 752 |     |
| CONNECT | 782 | 788 | 823 |     |
| CONNECT | 783 | 798 | 799 |     |
| CONNECT | 784 | 817 |     |     |
| CONNECT | 785 | 789 | 797 |     |
| CONNECT | 786 | 787 | 798 |     |
| CONNECT | 787 | 786 | 799 |     |
| CONNECT | 788 | 782 | 817 |     |
| CONNECT | 789 | 785 | 790 | 791 |
| CONNECT | 790 | 789 |     |     |
| CONNECT | 791 | 789 | 792 | 793 |
| CONNECT | 792 | 791 |     |     |
| CONNECT | 793 | 791 | 794 | 795 |
| CONNECT | 794 | 793 |     |     |
| CONNECT | 795 | 793 | 796 | 797 |

|         |     |     |     |     |
|---------|-----|-----|-----|-----|
| CONNECT | 796 | 795 |     |     |
| CONNECT | 797 | 785 | 795 | 798 |
| CONNECT | 798 | 797 | 786 | 783 |
| CONNECT | 799 | 787 | 783 | 800 |
| CONNECT | 800 | 799 | 801 | 815 |
| CONNECT | 801 | 800 | 802 | 803 |
| CONNECT | 802 | 801 |     |     |
| CONNECT | 803 | 801 | 804 | 805 |
| CONNECT | 804 | 803 |     |     |
| CONNECT | 805 | 803 | 806 | 814 |
| CONNECT | 806 | 805 | 807 | 808 |
| CONNECT | 807 | 806 |     |     |
| CONNECT | 808 | 806 | 809 | 810 |
| CONNECT | 809 | 808 |     |     |
| CONNECT | 810 | 808 | 811 | 812 |
| CONNECT | 811 | 810 |     |     |
| CONNECT | 812 | 810 | 813 | 814 |
| CONNECT | 813 | 812 |     |     |
| CONNECT | 814 | 805 | 812 | 815 |
| CONNECT | 815 | 814 | 800 | 816 |
| CONNECT | 816 | 815 |     |     |
| CONNECT | 817 | 784 | 788 |     |
| CONNECT | 818 | 833 | 834 |     |
| CONNECT | 819 | 852 |     |     |
| CONNECT | 820 | 824 | 832 |     |
| CONNECT | 821 | 822 | 833 |     |
| CONNECT | 822 | 821 | 834 |     |
| CONNECT | 823 | 782 | 852 |     |
| CONNECT | 824 | 820 | 825 | 826 |
| CONNECT | 825 | 824 |     |     |
| CONNECT | 826 | 824 | 827 | 828 |
| CONNECT | 827 | 826 |     |     |
| CONNECT | 828 | 826 | 829 | 830 |
| CONNECT | 829 | 828 |     |     |
| CONNECT | 830 | 828 | 831 | 832 |
| CONNECT | 831 | 830 |     |     |
| CONNECT | 832 | 830 | 820 | 833 |
| CONNECT | 833 | 818 | 821 | 832 |
| CONNECT | 834 | 818 | 822 | 835 |
| CONNECT | 835 | 834 | 836 | 850 |
| CONNECT | 836 | 835 | 837 | 838 |
| CONNECT | 837 | 836 |     |     |
| CONNECT | 838 | 836 | 839 | 840 |
| CONNECT | 839 | 838 |     |     |
| CONNECT | 840 | 838 | 841 | 849 |
| CONNECT | 841 | 840 | 842 | 843 |
| CONNECT | 842 | 841 |     |     |
| CONNECT | 843 | 841 | 844 | 845 |
| CONNECT | 844 | 843 |     |     |
| CONNECT | 845 | 843 | 846 | 847 |
| CONNECT | 846 | 845 |     |     |
| CONNECT | 847 | 845 | 848 | 849 |
| CONNECT | 848 | 847 |     |     |
| CONNECT | 849 | 840 | 847 | 850 |
| CONNECT | 850 | 835 | 849 | 851 |
| CONNECT | 851 | 850 |     |     |
| CONNECT | 852 | 819 | 823 |     |

|         |     |     |     |     |
|---------|-----|-----|-----|-----|
| CONNECT | 853 | 859 | 894 |     |
| CONNECT | 854 | 869 | 870 |     |
| CONNECT | 855 | 888 |     |     |
| CONNECT | 856 | 860 | 868 |     |
| CONNECT | 857 | 858 | 869 |     |
| CONNECT | 858 | 857 | 870 |     |
| CONNECT | 859 | 853 | 888 |     |
| CONNECT | 860 | 856 | 861 | 862 |
| CONNECT | 861 | 860 |     |     |
| CONNECT | 862 | 860 | 863 | 864 |
| CONNECT | 863 | 862 |     |     |
| CONNECT | 864 | 862 | 865 | 866 |
| CONNECT | 865 | 864 |     |     |
| CONNECT | 866 | 864 | 867 | 868 |
| CONNECT | 867 | 866 |     |     |
| CONNECT | 868 | 856 | 866 | 869 |
| CONNECT | 869 | 857 | 868 | 854 |
| CONNECT | 870 | 858 | 854 | 871 |
| CONNECT | 871 | 870 | 872 | 886 |
| CONNECT | 872 | 871 | 873 | 874 |
| CONNECT | 873 | 872 |     |     |
| CONNECT | 874 | 872 | 875 | 876 |
| CONNECT | 875 | 874 |     |     |
| CONNECT | 876 | 874 | 877 | 885 |
| CONNECT | 877 | 876 | 878 | 879 |
| CONNECT | 878 | 877 |     |     |
| CONNECT | 879 | 877 | 880 | 881 |
| CONNECT | 880 | 879 |     |     |
| CONNECT | 881 | 879 | 882 | 883 |
| CONNECT | 882 | 881 |     |     |
| CONNECT | 883 | 881 | 884 | 885 |
| CONNECT | 884 | 883 |     |     |
| CONNECT | 885 | 883 | 876 | 886 |
| CONNECT | 886 | 871 | 885 | 887 |
| CONNECT | 887 | 886 |     |     |
| CONNECT | 888 | 855 | 859 |     |
| CONNECT | 889 | 904 | 905 |     |
| CONNECT | 890 | 923 |     |     |
| CONNECT | 891 | 895 | 903 |     |
| CONNECT | 892 | 893 | 904 |     |
| CONNECT | 893 | 892 | 905 |     |
| CONNECT | 894 | 853 | 923 |     |
| CONNECT | 895 | 891 | 896 | 897 |
| CONNECT | 896 | 895 |     |     |
| CONNECT | 897 | 895 | 898 | 899 |
| CONNECT | 898 | 897 |     |     |
| CONNECT | 899 | 897 | 900 | 901 |
| CONNECT | 900 | 899 |     |     |
| CONNECT | 901 | 899 | 902 | 903 |
| CONNECT | 902 | 901 |     |     |
| CONNECT | 903 | 901 | 891 | 904 |
| CONNECT | 904 | 889 | 892 | 903 |
| CONNECT | 905 | 889 | 893 | 906 |
| CONNECT | 906 | 905 | 907 | 921 |
| CONNECT | 907 | 906 | 908 | 909 |
| CONNECT | 908 | 907 |     |     |
| CONNECT | 909 | 907 | 910 | 911 |



|        |     |     |     |     |
|--------|-----|-----|-----|-----|
| CONECT | 910 | 909 |     |     |
| CONECT | 911 | 909 | 912 | 920 |
| CONECT | 912 | 911 | 913 | 914 |
| CONECT | 913 | 912 |     |     |
| CONECT | 914 | 912 | 915 | 916 |
| CONECT | 915 | 914 |     |     |
| CONECT | 916 | 914 | 917 | 918 |
| CONECT | 917 | 916 |     |     |
| CONECT | 918 | 916 | 919 | 920 |
| CONECT | 919 | 918 |     |     |
| CONECT | 920 | 911 | 918 | 921 |
| CONECT | 921 | 906 | 920 | 922 |
| CONECT | 922 | 921 |     |     |
| CONECT | 923 | 890 | 894 |     |
| CONECT | 924 | 930 | 965 |     |
| CONECT | 925 | 940 | 941 |     |
| CONECT | 926 | 959 |     |     |
| CONECT | 927 | 931 | 939 |     |
| CONECT | 928 | 929 | 940 |     |
| CONECT | 929 | 928 | 941 |     |
| CONECT | 930 | 924 | 959 |     |
| CONECT | 931 | 927 | 932 | 933 |
| CONECT | 932 | 931 |     |     |
| CONECT | 933 | 931 | 934 | 935 |
| CONECT | 934 | 933 |     |     |
| CONECT | 935 | 933 | 936 | 937 |
| CONECT | 936 | 935 |     |     |
| CONECT | 937 | 935 | 938 | 939 |
| CONECT | 938 | 937 |     |     |
| CONECT | 939 | 927 | 937 | 940 |
| CONECT | 940 | 925 | 928 | 939 |
| CONECT | 941 | 925 | 929 | 942 |
| CONECT | 942 | 941 | 943 | 957 |
| CONECT | 943 | 942 | 944 | 945 |
| CONECT | 944 | 943 |     |     |
| CONECT | 945 | 943 | 946 | 947 |
| CONECT | 946 | 945 |     |     |
| CONECT | 947 | 945 | 948 | 956 |
| CONECT | 948 | 947 | 949 | 950 |
| CONECT | 949 | 948 |     |     |
| CONECT | 950 | 948 | 951 | 952 |
| CONECT | 951 | 950 |     |     |
| CONECT | 952 | 950 | 953 | 954 |
| CONECT | 953 | 952 |     |     |
| CONECT | 954 | 952 | 955 | 956 |
| CONECT | 955 | 954 |     |     |
| CONECT | 956 | 947 | 954 | 957 |
| CONECT | 957 | 942 | 956 | 958 |
| CONECT | 958 | 957 |     |     |
| CONECT | 959 | 926 | 930 |     |
| CONECT | 960 | 975 | 976 |     |
| CONECT | 961 | 994 |     |     |
| CONECT | 962 | 966 | 974 |     |
| CONECT | 963 | 964 | 975 |     |
| CONECT | 964 | 963 | 976 |     |
| CONECT | 965 | 924 | 994 |     |
| CONECT | 966 | 962 | 967 | 968 |

CONNECT 967 966  
CONNECT 968 966 969 970  
CONNECT 969 968  
CONNECT 970 968 971 972  
CONNECT 971 970  
CONNECT 972 970 973 974  
CONNECT 973 972  
CONNECT 974 962 972 975  
CONNECT 975 974 960 963  
CONNECT 976 960 964 977  
CONNECT 977 976 978 992  
CONNECT 978 977 979 980  
CONNECT 979 978  
CONNECT 980 978 981 982  
CONNECT 981 980  
CONNECT 982 980 983 991  
CONNECT 983 982 984 985  
CONNECT 984 983  
CONNECT 985 983 986 987  
CONNECT 986 985  
CONNECT 987 985 988 989  
CONNECT 988 987  
CONNECT 989 987 990 991  
CONNECT 990 989  
CONNECT 991 982 989 992  
CONNECT 992 991 977 993  
CONNECT 993 992  
CONNECT 994 961 965  
CONNECT 995 1001 1036  
CONNECT 996 1011 1012  
CONNECT 997 1030  
CONNECT 998 1002 1010  
CONNECT 999 1000 1011  
CONNECT 1000 999 1012  
CONNECT 1001 995 1030  
CONNECT 1002 998 1003 1004  
CONNECT 1003 1002  
CONNECT 1004 1002 1005 1006  
CONNECT 1005 1004  
CONNECT 1006 1004 1007 1008  
CONNECT 1007 1006  
CONNECT 1008 1006 1009 1010  
CONNECT 1009 1008  
CONNECT 1010 998 1008 1011  
CONNECT 1011 996 999 1010  
CONNECT 1012 996 1000 1013  
CONNECT 1013 1012 1014 1028  
CONNECT 1014 1013 1015 1016  
CONNECT 1015 1014  
CONNECT 1016 1014 1017 1018  
CONNECT 1017 1016  
CONNECT 1018 1016 1019 1027  
CONNECT 1019 1018 1020 1021  
CONNECT 1020 1019  
CONNECT 1021 1019 1022 1023  
CONNECT 1022 1021  
CONNECT 1023 1021 1024 1025

```

CONNECT 1024 1023
CONNECT 1025 1023 1026 1027
CONNECT 1026 1025
CONNECT 1027 1018 1025 1028
CONNECT 1028 1013 1027 1029
CONNECT 1029 1028
CONNECT 1030 997 1001
CONNECT 1031 1046 1047
CONNECT 1032 1065
CONNECT 1033 1037 1045
CONNECT 1034 1035 1046
CONNECT 1035 1034 1047
CONNECT 1036 995 1065
CONNECT 1037 1033 1038 1039
CONNECT 1038 1037
CONNECT 1039 1037 1040 1041
CONNECT 1040 1039
CONNECT 1041 1039 1042 1043
CONNECT 1042 1041
CONNECT 1043 1041 1044 1045
CONNECT 1044 1043
CONNECT 1045 1043 1033 1046
CONNECT 1046 1031 1045 1034
CONNECT 1047 1031 1035 1048
CONNECT 1048 1047 1049 1063
CONNECT 1049 1048 1050 1051
CONNECT 1050 1049
CONNECT 1051 1049 1052 1053
CONNECT 1052 1051
CONNECT 1053 1051 1054 1062
CONNECT 1054 1053 1055 1056
CONNECT 1055 1054
CONNECT 1056 1054 1057 1058
CONNECT 1057 1056
CONNECT 1058 1056 1059 1060
CONNECT 1059 1058
CONNECT 1060 1058 1061 1062
CONNECT 1061 1060
CONNECT 1062 1060 1053 1063
CONNECT 1063 1048 1062 1064
CONNECT 1064 1063
CONNECT 1065 1032 1036

```

**Table 2.** PDB file of the optimised structure of the 15-nuclear model of the HS centre in LS matrix

```

TITLE          CSD ENTRY jmk-126-9-90kslow
REMARK        1 File created by GaussView 6.0.16
HETATM        1 Fe          0      -18.386   6.224  -0.757
Fe
HETATM        2 S          0      -22.650   7.012  -1.570
S
HETATM        3 S          0      -17.259   8.917  -4.482
S
HETATM        4 N          0      -19.247   5.009  -2.125
N

```

|        |    |   |   |         |        |        |
|--------|----|---|---|---------|--------|--------|
| HETATM | 5  | N | 0 | -20.225 | 7.010  | -0.793 |
| N      |    |   |   |         |        |        |
| HETATM | 6  | N | 0 | -20.797 | 8.072  | -0.144 |
| N      |    |   |   |         |        |        |
| HETATM | 7  | N | 0 | -17.862 | 7.407  | -2.205 |
| N      |    |   |   |         |        |        |
| HETATM | 8  | C | 0 | -18.677 | 4.030  | -2.816 |
| C      |    |   |   |         |        |        |
| HETATM | 9  | H | 0 | -17.747 | 3.872  | -2.703 |
| H      |    |   |   |         |        |        |
| HETATM | 10 | C | 0 | -19.388 | 3.229  | -3.698 |
| C      |    |   |   |         |        |        |
| HETATM | 11 | H | 0 | -18.948 | 2.524  | -4.158 |
| H      |    |   |   |         |        |        |
| HETATM | 12 | C | 0 | -20.723 | 3.454  | -3.909 |
| C      |    |   |   |         |        |        |
| HETATM | 13 | H | 0 | -21.219 | 2.909  | -4.509 |
| H      |    |   |   |         |        |        |
| HETATM | 14 | C | 0 | -21.333 | 4.491  | -3.227 |
| C      |    |   |   |         |        |        |
| HETATM | 15 | H | 0 | -22.254 | 4.682  | -3.360 |
| H      |    |   |   |         |        |        |
| HETATM | 16 | C | 0 | -20.572 | 5.249  | -2.345 |
| C      |    |   |   |         |        |        |
| HETATM | 17 | C | 0 | -21.057 | 6.370  | -1.575 |
| C      |    |   |   |         |        |        |
| HETATM | 18 | C | 0 | -22.061 | 8.197  | -0.434 |
| C      |    |   |   |         |        |        |
| HETATM | 19 | C | 0 | -22.956 | 9.221  | 0.123  |
| C      |    |   |   |         |        |        |
| HETATM | 20 | C | 0 | -22.432 | 10.295 | 0.881  |
| C      |    |   |   |         |        |        |
| HETATM | 21 | H | 0 | -21.493 | 10.366 | 1.004  |
| H      |    |   |   |         |        |        |
| HETATM | 22 | C | 0 | -23.250 | 11.220 | 1.433  |
| C      |    |   |   |         |        |        |
| HETATM | 23 | H | 0 | -22.876 | 11.938 | 1.930  |
| H      |    |   |   |         |        |        |
| HETATM | 24 | C | 0 | -24.660 | 11.133 | 1.281  |
| C      |    |   |   |         |        |        |
| HETATM | 25 | C | 0 | -25.549 | 12.063 | 1.862  |
| C      |    |   |   |         |        |        |
| HETATM | 26 | H | 0 | -25.202 | 12.787 | 2.371  |
| H      |    |   |   |         |        |        |
| HETATM | 27 | C | 0 | -26.905 | 11.935 | 1.704  |
| C      |    |   |   |         |        |        |
| HETATM | 28 | H | 0 | -27.487 | 12.572 | 2.103  |
| H      |    |   |   |         |        |        |
| HETATM | 29 | C | 0 | -27.443 | 10.869 | 0.955  |
| C      |    |   |   |         |        |        |
| HETATM | 30 | H | 0 | -28.383 | 10.790 | 0.849  |
| H      |    |   |   |         |        |        |
| HETATM | 31 | C | 0 | -26.613 | 9.951  | 0.381  |
| C      |    |   |   |         |        |        |
| HETATM | 32 | H | 0 | -26.982 | 9.235  | -0.121 |
| H      |    |   |   |         |        |        |

|        |    |   |   |         |        |        |
|--------|----|---|---|---------|--------|--------|
| HETATM | 33 | C | 0 | -25.201 | 10.053 | 0.528  |
| C      |    |   |   |         |        |        |
| HETATM | 34 | C | 0 | -24.322 | 9.117  | -0.042 |
| C      |    |   |   |         |        |        |
| HETATM | 35 | H | 0 | -24.676 | 8.396  | -0.552 |
| H      |    |   |   |         |        |        |
| HETATM | 36 | C | 0 | -17.621 | 8.034  | -3.134 |
| C      |    |   |   |         |        |        |
| HETATM | 37 | S | 0 | -14.122 | 5.435  | 0.057  |
| S      |    |   |   |         |        |        |
| HETATM | 38 | S | 0 | -19.512 | 3.530  | 2.970  |
| S      |    |   |   |         |        |        |
| HETATM | 39 | N | 0 | -17.525 | 7.439  | 0.613  |
| N      |    |   |   |         |        |        |
| HETATM | 40 | N | 0 | -16.546 | 5.437  | -0.719 |
| N      |    |   |   |         |        |        |
| HETATM | 41 | N | 0 | -15.974 | 4.375  | -1.368 |
| N      |    |   |   |         |        |        |
| HETATM | 42 | N | 0 | -18.910 | 5.041  | 0.693  |
| N      |    |   |   |         |        |        |
| HETATM | 43 | C | 0 | -18.094 | 8.417  | 1.303  |
| C      |    |   |   |         |        |        |
| HETATM | 44 | H | 0 | -19.024 | 8.576  | 1.190  |
| H      |    |   |   |         |        |        |
| HETATM | 45 | C | 0 | -17.382 | 9.218  | 2.185  |
| C      |    |   |   |         |        |        |
| HETATM | 46 | H | 0 | -17.823 | 9.923  | 2.646  |
| H      |    |   |   |         |        |        |
| HETATM | 47 | C | 0 | -16.048 | 8.993  | 2.397  |
| C      |    |   |   |         |        |        |
| HETATM | 48 | H | 0 | -15.553 | 9.537  | 2.997  |
| H      |    |   |   |         |        |        |
| HETATM | 49 | C | 0 | -15.438 | 7.956  | 1.715  |
| C      |    |   |   |         |        |        |
| HETATM | 50 | H | 0 | -14.518 | 7.765  | 1.848  |
| H      |    |   |   |         |        |        |
| HETATM | 51 | C | 0 | -16.199 | 7.198  | 0.832  |
| C      |    |   |   |         |        |        |
| HETATM | 52 | C | 0 | -15.714 | 6.077  | 0.063  |
| C      |    |   |   |         |        |        |
| HETATM | 53 | C | 0 | -14.711 | 4.250  | -1.079 |
| C      |    |   |   |         |        |        |
| HETATM | 54 | C | 0 | -13.815 | 3.226  | -1.636 |
| C      |    |   |   |         |        |        |
| HETATM | 55 | C | 0 | -14.339 | 2.153  | -2.393 |
| C      |    |   |   |         |        |        |
| HETATM | 56 | H | 0 | -15.278 | 2.080  | -2.516 |
| H      |    |   |   |         |        |        |
| HETATM | 57 | C | 0 | -13.521 | 1.227  | -2.945 |
| C      |    |   |   |         |        |        |
| HETATM | 58 | H | 0 | -13.896 | 0.509  | -3.442 |
| H      |    |   |   |         |        |        |
| HETATM | 59 | C | 0 | -12.111 | 1.314  | -2.793 |
| C      |    |   |   |         |        |        |
| HETATM | 60 | C | 0 | -11.222 | 0.384  | -3.375 |
| C      |    |   |   |         |        |        |

|        |    |    |   |         |        |        |
|--------|----|----|---|---------|--------|--------|
| HETATM | 61 | H  | 0 | -11.569 | -0.339 | -3.883 |
| H      |    |    |   |         |        |        |
| HETATM | 62 | C  | 0 | -9.866  | 0.513  | -3.217 |
| C      |    |    |   |         |        |        |
| HETATM | 63 | H  | 0 | -9.284  | -0.124 | -3.615 |
| H      |    |    |   |         |        |        |
| HETATM | 64 | C  | 0 | -9.328  | 1.578  | -2.467 |
| C      |    |    |   |         |        |        |
| HETATM | 65 | H  | 0 | -8.388  | 1.657  | -2.361 |
| H      |    |    |   |         |        |        |
| HETATM | 66 | C  | 0 | -10.159 | 2.496  | -1.893 |
| C      |    |    |   |         |        |        |
| HETATM | 67 | H  | 0 | -9.790  | 3.212  | -1.391 |
| H      |    |    |   |         |        |        |
| HETATM | 68 | C  | 0 | -11.570 | 2.394  | -2.040 |
| C      |    |    |   |         |        |        |
| HETATM | 69 | C  | 0 | -12.449 | 3.330  | -1.470 |
| C      |    |    |   |         |        |        |
| HETATM | 70 | H  | 0 | -12.096 | 4.050  | -0.960 |
| H      |    |    |   |         |        |        |
| HETATM | 71 | C  | 0 | -19.152 | 4.413  | 1.622  |
| C      |    |    |   |         |        |        |
| HETATM | 72 | Fe | 0 | -14.546 | -5.522 | -0.284 |
| Fe     |    |    |   |         |        |        |
| HETATM | 73 | S  | 0 | -18.809 | -4.733 | -1.098 |
| S      |    |    |   |         |        |        |
| HETATM | 74 | S  | 0 | -13.419 | -2.828 | -4.010 |
| S      |    |    |   |         |        |        |
| HETATM | 75 | N  | 0 | -15.407 | -6.737 | -1.653 |
| N      |    |    |   |         |        |        |
| HETATM | 76 | N  | 0 | -16.386 | -4.735 | -0.321 |
| N      |    |    |   |         |        |        |
| HETATM | 77 | N  | 0 | -16.958 | -3.672 | 0.327  |
| N      |    |    |   |         |        |        |
| HETATM | 78 | N  | 0 | -14.022 | -4.339 | -1.734 |
| N      |    |    |   |         |        |        |
| HETATM | 79 | C  | 0 | -14.837 | -7.714 | -2.344 |
| C      |    |    |   |         |        |        |
| HETATM | 80 | H  | 0 | -13.907 | -7.873 | -2.231 |
| H      |    |    |   |         |        |        |
| HETATM | 81 | C  | 0 | -15.549 | -8.517 | -3.226 |
| C      |    |    |   |         |        |        |
| HETATM | 82 | H  | 0 | -15.108 | -9.222 | -3.686 |
| H      |    |    |   |         |        |        |
| HETATM | 83 | C  | 0 | -16.883 | -8.291 | -3.438 |
| C      |    |    |   |         |        |        |
| HETATM | 84 | H  | 0 | -17.378 | -8.836 | -4.037 |
| H      |    |    |   |         |        |        |
| HETATM | 85 | C  | 0 | -17.493 | -7.255 | -2.756 |
| C      |    |    |   |         |        |        |
| HETATM | 86 | H  | 0 | -18.414 | -7.063 | -2.889 |
| H      |    |    |   |         |        |        |
| HETATM | 87 | C  | 0 | -16.733 | -6.497 | -1.873 |
| C      |    |    |   |         |        |        |
| HETATM | 88 | C  | 0 | -17.217 | -5.375 | -1.104 |
| C      |    |    |   |         |        |        |

|        |     |   |   |         |        |        |
|--------|-----|---|---|---------|--------|--------|
| HETATM | 89  | C | 0 | -18.221 | -3.549 | 0.038  |
| C      |     |   |   |         |        |        |
| HETATM | 90  | C | 0 | -19.116 | -2.524 | 0.596  |
| C      |     |   |   |         |        |        |
| HETATM | 91  | C | 0 | -18.592 | -1.451 | 1.352  |
| C      |     |   |   |         |        |        |
| HETATM | 92  | H | 0 | -17.653 | -1.379 | 1.475  |
| H      |     |   |   |         |        |        |
| HETATM | 93  | C | 0 | -19.410 | -0.526 | 1.905  |
| C      |     |   |   |         |        |        |
| HETATM | 94  | H | 0 | -19.036 | 0.193  | 2.401  |
| H      |     |   |   |         |        |        |
| HETATM | 95  | C | 0 | -20.821 | -0.612 | 1.752  |
| C      |     |   |   |         |        |        |
| HETATM | 96  | C | 0 | -21.709 | 0.317  | 2.335  |
| C      |     |   |   |         |        |        |
| HETATM | 97  | H | 0 | -21.363 | 1.041  | 2.842  |
| H      |     |   |   |         |        |        |
| HETATM | 98  | C | 0 | -23.065 | 0.190  | 2.176  |
| C      |     |   |   |         |        |        |
| HETATM | 99  | H | 0 | -23.648 | 0.826  | 2.574  |
| H      |     |   |   |         |        |        |
| HETATM | 100 | C | 0 | -23.603 | -0.877 | 1.427  |
| C      |     |   |   |         |        |        |
| HETATM | 101 | H | 0 | -24.544 | -0.956 | 1.321  |
| H      |     |   |   |         |        |        |
| HETATM | 102 | C | 0 | -22.772 | -1.794 | 0.853  |
| C      |     |   |   |         |        |        |
| HETATM | 103 | H | 0 | -23.141 | -2.510 | 0.350  |
| H      |     |   |   |         |        |        |
| HETATM | 104 | C | 0 | -21.361 | -1.691 | 1.000  |
| C      |     |   |   |         |        |        |
| HETATM | 105 | C | 0 | -20.482 | -2.629 | 0.429  |
| C      |     |   |   |         |        |        |
| HETATM | 106 | H | 0 | -20.835 | -3.349 | -0.081 |
| H      |     |   |   |         |        |        |
| HETATM | 107 | C | 0 | -13.780 | -3.711 | -2.662 |
| C      |     |   |   |         |        |        |
| HETATM | 108 | S | 0 | -10.283 | -6.310 | 0.530  |
| S      |     |   |   |         |        |        |
| HETATM | 109 | S | 0 | -15.672 | -8.216 | 3.441  |
| S      |     |   |   |         |        |        |
| HETATM | 110 | N | 0 | -13.685 | -4.306 | 1.084  |
| N      |     |   |   |         |        |        |
| HETATM | 111 | N | 0 | -12.706 | -6.309 | -0.248 |
| N      |     |   |   |         |        |        |
| HETATM | 112 | N | 0 | -12.134 | -7.371 | -0.896 |
| N      |     |   |   |         |        |        |
| HETATM | 113 | N | 0 | -15.070 | -6.705 | 1.165  |
| N      |     |   |   |         |        |        |
| HETATM | 114 | C | 0 | -14.255 | -3.329 | 1.775  |
| C      |     |   |   |         |        |        |
| HETATM | 115 | H | 0 | -15.185 | -3.170 | 1.663  |
| H      |     |   |   |         |        |        |
| HETATM | 116 | C | 0 | -13.543 | -2.526 | 2.658  |
| C      |     |   |   |         |        |        |

|        |     |    |   |         |         |        |
|--------|-----|----|---|---------|---------|--------|
| HETATM | 117 | H  | 0 | -13.983 | -1.821  | 3.117  |
| H      |     |    |   |         |         |        |
| HETATM | 118 | C  | 0 | -12.209 | -2.752  | 2.868  |
| C      |     |    |   |         |         |        |
| HETATM | 119 | H  | 0 | -11.713 | -2.208  | 3.468  |
| H      |     |    |   |         |         |        |
| HETATM | 120 | C  | 0 | -11.598 | -3.789  | 2.187  |
| C      |     |    |   |         |         |        |
| HETATM | 121 | H  | 0 | -10.677 | -3.980  | 2.320  |
| H      |     |    |   |         |         |        |
| HETATM | 122 | C  | 0 | -12.359 | -4.547  | 1.304  |
| C      |     |    |   |         |         |        |
| HETATM | 123 | C  | 0 | -11.874 | -5.669  | 0.535  |
| C      |     |    |   |         |         |        |
| HETATM | 124 | C  | 0 | -10.870 | -7.495  | -0.606 |
| C      |     |    |   |         |         |        |
| HETATM | 125 | C  | 0 | -9.976  | -8.520  | -1.164 |
| C      |     |    |   |         |         |        |
| HETATM | 126 | C  | 0 | -10.499 | -9.592  | -1.922 |
| C      |     |    |   |         |         |        |
| HETATM | 127 | H  | 0 | -11.438 | -9.665  | -2.044 |
| H      |     |    |   |         |         |        |
| HETATM | 128 | C  | 0 | -9.682  | -10.518 | -2.473 |
| C      |     |    |   |         |         |        |
| HETATM | 129 | H  | 0 | -10.055 | -11.236 | -2.970 |
| H      |     |    |   |         |         |        |
| HETATM | 130 | C  | 0 | -8.271  | -10.432 | -2.322 |
| C      |     |    |   |         |         |        |
| HETATM | 131 | C  | 0 | -7.383  | -11.360 | -2.903 |
| C      |     |    |   |         |         |        |
| HETATM | 132 | H  | 0 | -7.729  | -12.084 | -3.412 |
| H      |     |    |   |         |         |        |
| HETATM | 133 | C  | 0 | -6.027  | -11.233 | -2.745 |
| C      |     |    |   |         |         |        |
| HETATM | 134 | H  | 0 | -5.444  | -11.870 | -3.143 |
| H      |     |    |   |         |         |        |
| HETATM | 135 | C  | 0 | -5.488  | -10.167 | -1.996 |
| C      |     |    |   |         |         |        |
| HETATM | 136 | H  | 0 | -4.548  | -10.088 | -1.890 |
| H      |     |    |   |         |         |        |
| HETATM | 137 | C  | 0 | -6.319  | -9.249  | -1.422 |
| C      |     |    |   |         |         |        |
| HETATM | 138 | H  | 0 | -5.950  | -8.534  | -0.920 |
| H      |     |    |   |         |         |        |
| HETATM | 139 | C  | 0 | -7.731  | -9.352  | -1.569 |
| C      |     |    |   |         |         |        |
| HETATM | 140 | C  | 0 | -8.610  | -8.415  | -0.998 |
| C      |     |    |   |         |         |        |
| HETATM | 141 | H  | 0 | -8.256  | -7.695  | -0.489 |
| H      |     |    |   |         |         |        |
| HETATM | 142 | C  | 0 | -15.311 | -7.332  | 2.093  |
| C      |     |    |   |         |         |        |
| HETATM | 143 | Fe | 0 | -10.706 | -17.267 | 0.187  |
| Fe     |     |    |   |         |         |        |
| HETATM | 144 | S  | 0 | -14.969 | -16.479 | -0.627 |
| S      |     |    |   |         |         |        |



|        |     |   |   |         |         |        |
|--------|-----|---|---|---------|---------|--------|
| HETATM | 145 | S | 0 | -9.579  | -14.574 | -3.539 |
| S      |     |   |   |         |         |        |
| HETATM | 146 | N | 0 | -11.567 | -18.482 | -1.181 |
| N      |     |   |   |         |         |        |
| HETATM | 147 | N | 0 | -12.546 | -16.480 | 0.151  |
| N      |     |   |   |         |         |        |
| HETATM | 148 | N | 0 | -13.117 | -15.418 | 0.799  |
| N      |     |   |   |         |         |        |
| HETATM | 149 | N | 0 | -10.181 | -16.084 | -1.263 |
| N      |     |   |   |         |         |        |
| HETATM | 150 | C | 0 | -10.997 | -19.460 | -1.872 |
| C      |     |   |   |         |         |        |
| HETATM | 151 | H | 0 | -10.067 | -19.618 | -1.760 |
| H      |     |   |   |         |         |        |
| HETATM | 152 | C | 0 | -11.708 | -20.262 | -2.755 |
| C      |     |   |   |         |         |        |
| HETATM | 153 | H | 0 | -11.269 | -20.968 | -3.215 |
| H      |     |   |   |         |         |        |
| HETATM | 154 | C | 0 | -13.042 | -20.036 | -2.965 |
| C      |     |   |   |         |         |        |
| HETATM | 155 | H | 0 | -13.538 | -20.581 | -3.565 |
| H      |     |   |   |         |         |        |
| HETATM | 156 | C | 0 | -13.654 | -19.000 | -2.285 |
| C      |     |   |   |         |         |        |
| HETATM | 157 | H | 0 | -14.574 | -18.808 | -2.417 |
| H      |     |   |   |         |         |        |
| HETATM | 158 | C | 0 | -12.893 | -18.242 | -1.401 |
| C      |     |   |   |         |         |        |
| HETATM | 159 | C | 0 | -13.377 | -17.120 | -0.632 |
| C      |     |   |   |         |         |        |
| HETATM | 160 | C | 0 | -14.381 | -15.293 | 0.509  |
| C      |     |   |   |         |         |        |
| HETATM | 161 | C | 0 | -15.276 | -14.269 | 1.067  |
| C      |     |   |   |         |         |        |
| HETATM | 162 | C | 0 | -14.753 | -13.196 | 1.824  |
| C      |     |   |   |         |         |        |
| HETATM | 163 | H | 0 | -13.813 | -13.125 | 1.947  |
| H      |     |   |   |         |         |        |
| HETATM | 164 | C | 0 | -15.569 | -12.271 | 2.376  |
| C      |     |   |   |         |         |        |
| HETATM | 165 | H | 0 | -15.196 | -11.552 | 2.873  |
| H      |     |   |   |         |         |        |
| HETATM | 166 | C | 0 | -16.981 | -12.357 | 2.225  |
| C      |     |   |   |         |         |        |
| HETATM | 167 | C | 0 | -17.869 | -11.428 | 2.806  |
| C      |     |   |   |         |         |        |
| HETATM | 168 | H | 0 | -17.523 | -10.705 | 3.314  |
| H      |     |   |   |         |         |        |
| HETATM | 169 | C | 0 | -19.226 | -11.556 | 2.648  |
| C      |     |   |   |         |         |        |
| HETATM | 170 | H | 0 | -19.808 | -10.919 | 3.046  |
| H      |     |   |   |         |         |        |
| HETATM | 171 | C | 0 | -19.763 | -12.622 | 1.898  |
| C      |     |   |   |         |         |        |
| HETATM | 172 | H | 0 | -20.704 | -12.701 | 1.793  |
| H      |     |   |   |         |         |        |

|        |     |   |   |         |         |        |
|--------|-----|---|---|---------|---------|--------|
| HETATM | 173 | C | 0 | -18.932 | -13.540 | 1.325  |
| C      |     |   |   |         |         |        |
| HETATM | 174 | H | 0 | -19.302 | -14.255 | 0.822  |
| H      |     |   |   |         |         |        |
| HETATM | 175 | C | 0 | -17.521 | -13.437 | 1.471  |
| C      |     |   |   |         |         |        |
| HETATM | 176 | C | 0 | -16.642 | -14.374 | 0.902  |
| C      |     |   |   |         |         |        |
| HETATM | 177 | H | 0 | -16.996 | -15.093 | 0.392  |
| H      |     |   |   |         |         |        |
| HETATM | 178 | C | 0 | -9.940  | -15.457 | -2.191 |
| C      |     |   |   |         |         |        |
| HETATM | 179 | S | 0 | -6.442  | -18.055 | 1.001  |
| S      |     |   |   |         |         |        |
| HETATM | 180 | S | 0 | -11.833 | -19.960 | 3.914  |
| S      |     |   |   |         |         |        |
| HETATM | 181 | N | 0 | -9.845  | -16.052 | 1.555  |
| N      |     |   |   |         |         |        |
| HETATM | 182 | N | 0 | -8.867  | -18.054 | 0.223  |
| N      |     |   |   |         |         |        |
| HETATM | 183 | N | 0 | -8.294  | -19.116 | -0.425 |
| N      |     |   |   |         |         |        |
| HETATM | 184 | N | 0 | -11.230 | -18.450 | 1.637  |
| N      |     |   |   |         |         |        |
| HETATM | 185 | C | 0 | -10.415 | -15.074 | 2.247  |
| C      |     |   |   |         |         |        |
| HETATM | 186 | H | 0 | -11.345 | -14.915 | 2.134  |
| H      |     |   |   |         |         |        |
| HETATM | 187 | C | 0 | -9.703  | -14.272 | 3.129  |
| C      |     |   |   |         |         |        |
| HETATM | 188 | H | 0 | -10.144 | -13.567 | 3.589  |
| H      |     |   |   |         |         |        |
| HETATM | 189 | C | 0 | -8.369  | -14.498 | 3.340  |
| C      |     |   |   |         |         |        |
| HETATM | 190 | H | 0 | -7.873  | -13.952 | 3.940  |
| H      |     |   |   |         |         |        |
| HETATM | 191 | C | 0 | -7.759  | -15.534 | 2.659  |
| C      |     |   |   |         |         |        |
| HETATM | 192 | H | 0 | -6.837  | -15.726 | 2.791  |
| H      |     |   |   |         |         |        |
| HETATM | 193 | C | 0 | -8.520  | -16.292 | 1.776  |
| C      |     |   |   |         |         |        |
| HETATM | 194 | C | 0 | -8.035  | -17.414 | 1.007  |
| C      |     |   |   |         |         |        |
| HETATM | 195 | C | 0 | -7.031  | -19.240 | -0.135 |
| C      |     |   |   |         |         |        |
| HETATM | 196 | C | 0 | -6.135  | -20.265 | -0.692 |
| C      |     |   |   |         |         |        |
| HETATM | 197 | C | 0 | -6.660  | -21.338 | -1.449 |
| C      |     |   |   |         |         |        |
| HETATM | 198 | H | 0 | -7.598  | -21.409 | -1.572 |
| H      |     |   |   |         |         |        |
| HETATM | 199 | C | 0 | -5.842  | -22.263 | -2.002 |
| C      |     |   |   |         |         |        |
| HETATM | 200 | H | 0 | -6.215  | -22.982 | -2.499 |
| H      |     |   |   |         |         |        |

|        |     |    |   |         |         |        |
|--------|-----|----|---|---------|---------|--------|
| HETATM | 201 | C  | 0 | -4.431  | -22.177 | -1.850 |
| C      |     |    |   |         |         |        |
| HETATM | 202 | C  | 0 | -3.542  | -23.106 | -2.431 |
| C      |     |    |   |         |         |        |
| HETATM | 203 | H  | 0 | -3.889  | -23.829 | -2.939 |
| H      |     |    |   |         |         |        |
| HETATM | 204 | C  | 0 | -2.186  | -22.978 | -2.273 |
| C      |     |    |   |         |         |        |
| HETATM | 205 | H  | 0 | -1.604  | -23.615 | -2.672 |
| H      |     |    |   |         |         |        |
| HETATM | 206 | C  | 0 | -1.649  | -21.912 | -1.524 |
| C      |     |    |   |         |         |        |
| HETATM | 207 | H  | 0 | -0.708  | -21.833 | -1.419 |
| H      |     |    |   |         |         |        |
| HETATM | 208 | C  | 0 | -2.479  | -20.994 | -0.951 |
| C      |     |    |   |         |         |        |
| HETATM | 209 | H  | 0 | -2.110  | -20.278 | -0.447 |
| H      |     |    |   |         |         |        |
| HETATM | 210 | C  | 0 | -3.891  | -21.097 | -1.097 |
| C      |     |    |   |         |         |        |
| HETATM | 211 | C  | 0 | -4.769  | -20.160 | -0.527 |
| C      |     |    |   |         |         |        |
| HETATM | 212 | H  | 0 | -4.416  | -19.441 | -0.017 |
| H      |     |    |   |         |         |        |
| HETATM | 213 | C  | 0 | -11.471 | -19.077 | 2.565  |
| C      |     |    |   |         |         |        |
| HETATM | 214 | Fe | 0 | -11.113 | 8.985   | -0.614 |
| Fe     |     |    |   |         |         |        |
| HETATM | 215 | S  | 0 | -15.376 | 9.773   | -1.428 |
| S      |     |    |   |         |         |        |
| HETATM | 216 | S  | 0 | -9.985  | 11.678  | -4.340 |
| S      |     |    |   |         |         |        |
| HETATM | 217 | N  | 0 | -11.974 | 7.769   | -1.982 |
| N      |     |    |   |         |         |        |
| HETATM | 218 | N  | 0 | -12.952 | 9.771   | -0.650 |
| N      |     |    |   |         |         |        |
| HETATM | 219 | N  | 0 | -13.524 | 10.833  | -0.002 |
| N      |     |    |   |         |         |        |
| HETATM | 220 | N  | 0 | -10.588 | 10.168  | -2.063 |
| N      |     |    |   |         |         |        |
| HETATM | 221 | C  | 0 | -11.404 | 6.791   | -2.674 |
| C      |     |    |   |         |         |        |
| HETATM | 222 | H  | 0 | -10.474 | 6.633   | -2.561 |
| H      |     |    |   |         |         |        |
| HETATM | 223 | C  | 0 | -12.115 | 5.990   | -3.556 |
| C      |     |    |   |         |         |        |
| HETATM | 224 | H  | 0 | -11.675 | 5.285   | -4.015 |
| H      |     |    |   |         |         |        |
| HETATM | 225 | C  | 0 | -13.449 | 6.215   | -3.767 |
| C      |     |    |   |         |         |        |
| HETATM | 226 | H  | 0 | -13.945 | 5.670   | -4.367 |
| H      |     |    |   |         |         |        |
| HETATM | 227 | C  | 0 | -14.060 | 7.251   | -3.085 |
| C      |     |    |   |         |         |        |
| HETATM | 228 | H  | 0 | -14.981 | 7.443   | -3.218 |
| H      |     |    |   |         |         |        |

|        |     |   |   |         |        |        |
|--------|-----|---|---|---------|--------|--------|
| HETATM | 229 | C | 0 | -13.300 | 8.009  | -2.203 |
| C      |     |   |   |         |        |        |
| HETATM | 230 | C | 0 | -13.784 | 9.131  | -1.433 |
| C      |     |   |   |         |        |        |
| HETATM | 231 | C | 0 | -14.788 | 10.958 | -0.292 |
| C      |     |   |   |         |        |        |
| HETATM | 232 | C | 0 | -15.683 | 11.982 | 0.266  |
| C      |     |   |   |         |        |        |
| HETATM | 233 | C | 0 | -15.159 | 13.056 | 1.023  |
| C      |     |   |   |         |        |        |
| HETATM | 234 | H | 0 | -14.220 | 13.127 | 1.146  |
| H      |     |   |   |         |        |        |
| HETATM | 235 | C | 0 | -15.977 | 13.981 | 1.576  |
| C      |     |   |   |         |        |        |
| HETATM | 236 | H | 0 | -15.603 | 14.699 | 2.072  |
| H      |     |   |   |         |        |        |
| HETATM | 237 | C | 0 | -17.387 | 13.894 | 1.423  |
| C      |     |   |   |         |        |        |
| HETATM | 238 | C | 0 | -18.276 | 14.823 | 2.004  |
| C      |     |   |   |         |        |        |
| HETATM | 239 | H | 0 | -17.930 | 15.547 | 2.513  |
| H      |     |   |   |         |        |        |
| HETATM | 240 | C | 0 | -19.633 | 14.696 | 1.846  |
| C      |     |   |   |         |        |        |
| HETATM | 241 | H | 0 | -20.215 | 15.332 | 2.245  |
| H      |     |   |   |         |        |        |
| HETATM | 242 | C | 0 | -20.170 | 13.630 | 1.098  |
| C      |     |   |   |         |        |        |
| HETATM | 243 | H | 0 | -21.111 | 13.550 | 0.992  |
| H      |     |   |   |         |        |        |
| HETATM | 244 | C | 0 | -19.340 | 12.712 | 0.524  |
| C      |     |   |   |         |        |        |
| HETATM | 245 | H | 0 | -19.708 | 11.996 | 0.021  |
| H      |     |   |   |         |        |        |
| HETATM | 246 | C | 0 | -17.927 | 12.814 | 0.671  |
| C      |     |   |   |         |        |        |
| HETATM | 247 | C | 0 | -17.049 | 11.878 | 0.100  |
| C      |     |   |   |         |        |        |
| HETATM | 248 | H | 0 | -17.402 | 11.157 | -0.410 |
| H      |     |   |   |         |        |        |
| HETATM | 249 | C | 0 | -10.347 | 10.795 | -2.992 |
| C      |     |   |   |         |        |        |
| HETATM | 250 | S | 0 | -6.849  | 8.196  | 0.200  |
| S      |     |   |   |         |        |        |
| HETATM | 251 | S | 0 | -12.240 | 6.290  | 3.112  |
| S      |     |   |   |         |        |        |
| HETATM | 252 | N | 0 | -10.252 | 10.200 | 0.755  |
| N      |     |   |   |         |        |        |
| HETATM | 253 | N | 0 | -9.274  | 8.198  | -0.577 |
| N      |     |   |   |         |        |        |
| HETATM | 254 | N | 0 | -8.702  | 7.135  | -1.225 |
| N      |     |   |   |         |        |        |
| HETATM | 255 | N | 0 | -11.637 | 7.802  | 0.835  |
| N      |     |   |   |         |        |        |
| HETATM | 256 | C | 0 | -10.821 | 11.178 | 1.445  |
| C      |     |   |   |         |        |        |

|        |     |   |   |         |        |        |
|--------|-----|---|---|---------|--------|--------|
| HETATM | 257 | H | 0 | -11.752 | 11.336 | 1.332  |
| H      |     |   |   |         |        |        |
| HETATM | 258 | C | 0 | -10.110 | 11.979 | 2.328  |
| C      |     |   |   |         |        |        |
| HETATM | 259 | H | 0 | -10.551 | 12.684 | 2.788  |
| H      |     |   |   |         |        |        |
| HETATM | 260 | C | 0 | -8.776  | 11.753 | 2.539  |
| C      |     |   |   |         |        |        |
| HETATM | 261 | H | 0 | -8.280  | 12.298 | 3.139  |
| H      |     |   |   |         |        |        |
| HETATM | 262 | C | 0 | -8.165  | 10.717 | 1.858  |
| C      |     |   |   |         |        |        |
| HETATM | 263 | H | 0 | -7.244  | 10.526 | 1.991  |
| H      |     |   |   |         |        |        |
| HETATM | 264 | C | 0 | -8.925  | 9.959  | 0.974  |
| C      |     |   |   |         |        |        |
| HETATM | 265 | C | 0 | -8.442  | 8.837  | 0.205  |
| C      |     |   |   |         |        |        |
| HETATM | 266 | C | 0 | -7.437  | 7.011  | -0.937 |
| C      |     |   |   |         |        |        |
| HETATM | 267 | C | 0 | -6.542  | 5.987  | -1.494 |
| C      |     |   |   |         |        |        |
| HETATM | 268 | C | 0 | -7.067  | 4.914  | -2.251 |
| C      |     |   |   |         |        |        |
| HETATM | 269 | H | 0 | -8.005  | 4.841  | -2.374 |
| H      |     |   |   |         |        |        |
| HETATM | 270 | C | 0 | -6.249  | 3.988  | -2.803 |
| C      |     |   |   |         |        |        |
| HETATM | 271 | H | 0 | -6.622  | 3.270  | -3.300 |
| H      |     |   |   |         |        |        |
| HETATM | 272 | C | 0 | -4.838  | 4.074  | -2.651 |
| C      |     |   |   |         |        |        |
| HETATM | 273 | C | 0 | -3.949  | 3.145  | -3.233 |
| C      |     |   |   |         |        |        |
| HETATM | 274 | H | 0 | -4.296  | 2.422  | -3.741 |
| H      |     |   |   |         |        |        |
| HETATM | 275 | C | 0 | -2.593  | 3.274  | -3.075 |
| C      |     |   |   |         |        |        |
| HETATM | 276 | H | 0 | -2.011  | 2.637  | -3.472 |
| H      |     |   |   |         |        |        |
| HETATM | 277 | C | 0 | -2.056  | 4.339  | -2.325 |
| C      |     |   |   |         |        |        |
| HETATM | 278 | H | 0 | -1.114  | 4.418  | -2.219 |
| H      |     |   |   |         |        |        |
| HETATM | 279 | C | 0 | -2.886  | 5.257  | -1.751 |
| C      |     |   |   |         |        |        |
| HETATM | 280 | H | 0 | -2.517  | 5.973  | -1.249 |
| H      |     |   |   |         |        |        |
| HETATM | 281 | C | 0 | -4.298  | 5.154  | -1.898 |
| C      |     |   |   |         |        |        |
| HETATM | 282 | C | 0 | -5.176  | 6.091  | -1.327 |
| C      |     |   |   |         |        |        |
| HETATM | 283 | H | 0 | -4.823  | 6.811  | -0.818 |
| H      |     |   |   |         |        |        |
| HETATM | 284 | C | 0 | -11.878 | 7.174  | 1.764  |
| C      |     |   |   |         |        |        |

|        |     |    |   |         |        |        |
|--------|-----|----|---|---------|--------|--------|
| HETATM | 285 | Fe | 0 | -7.273  | -2.761 | -0.142 |
| Fe     |     |    |   |         |        |        |
| HETATM | 286 | S  | 0 | -11.537 | -1.973 | -0.956 |
| S      |     |    |   |         |        |        |
| HETATM | 287 | S  | 0 | -6.146  | -0.067 | -3.868 |
| S      |     |    |   |         |        |        |
| HETATM | 288 | N  | 0 | -8.134  | -3.976 | -1.511 |
| N      |     |    |   |         |        |        |
| HETATM | 289 | N  | 0 | -9.112  | -1.974 | -0.179 |
| N      |     |    |   |         |        |        |
| HETATM | 290 | N  | 0 | -9.684  | -0.911 | 0.469  |
| N      |     |    |   |         |        |        |
| HETATM | 291 | N  | 0 | -6.749  | -1.578 | -1.592 |
| N      |     |    |   |         |        |        |
| HETATM | 292 | C  | 0 | -7.564  | -4.953 | -2.201 |
| C      |     |    |   |         |        |        |
| HETATM | 293 | H  | 0 | -6.634  | -5.112 | -2.089 |
| H      |     |    |   |         |        |        |
| HETATM | 294 | C  | 0 | -8.276  | -5.756 | -3.084 |
| C      |     |    |   |         |        |        |
| HETATM | 295 | H  | 0 | -7.835  | -6.461 | -3.544 |
| H      |     |    |   |         |        |        |
| HETATM | 296 | C  | 0 | -9.610  | -5.530 | -3.295 |
| C      |     |    |   |         |        |        |
| HETATM | 297 | H  | 0 | -10.106 | -6.075 | -3.895 |
| H      |     |    |   |         |        |        |
| HETATM | 298 | C  | 0 | -10.220 | -4.494 | -2.614 |
| C      |     |    |   |         |        |        |
| HETATM | 299 | H  | 0 | -11.142 | -4.302 | -2.747 |
| H      |     |    |   |         |        |        |
| HETATM | 300 | C  | 0 | -9.459  | -3.736 | -1.730 |
| C      |     |    |   |         |        |        |
| HETATM | 301 | C  | 0 | -9.944  | -2.614 | -0.962 |
| C      |     |    |   |         |        |        |
| HETATM | 302 | C  | 0 | -10.948 | -0.788 | 0.180  |
| C      |     |    |   |         |        |        |
| HETATM | 303 | C  | 0 | -11.844 | 0.237  | 0.738  |
| C      |     |    |   |         |        |        |
| HETATM | 304 | C  | 0 | -11.319 | 1.310  | 1.494  |
| C      |     |    |   |         |        |        |
| HETATM | 305 | H  | 0 | -10.380 | 1.382  | 1.617  |
| H      |     |    |   |         |        |        |
| HETATM | 306 | C  | 0 | -12.137 | 2.235  | 2.047  |
| C      |     |    |   |         |        |        |
| HETATM | 307 | H  | 0 | -11.764 | 2.954  | 2.543  |
| H      |     |    |   |         |        |        |
| HETATM | 308 | C  | 0 | -13.547 | 2.149  | 1.895  |
| C      |     |    |   |         |        |        |
| HETATM | 309 | C  | 0 | -14.437 | 3.078  | 2.477  |
| C      |     |    |   |         |        |        |
| HETATM | 310 | H  | 0 | -14.090 | 3.802  | 2.984  |
| H      |     |    |   |         |        |        |
| HETATM | 311 | C  | 0 | -15.793 | 2.950  | 2.318  |
| C      |     |    |   |         |        |        |
| HETATM | 312 | H  | 0 | -16.375 | 3.587  | 2.716  |
| H      |     |    |   |         |        |        |

|        |     |   |   |         |        |        |
|--------|-----|---|---|---------|--------|--------|
| HETATM | 313 | C | 0 | -16.330 | 1.884  | 1.569  |
| C      |     |   |   |         |        |        |
| HETATM | 314 | H | 0 | -17.270 | 1.805  | 1.463  |
| H      |     |   |   |         |        |        |
| HETATM | 315 | C | 0 | -15.500 | 0.966  | 0.995  |
| C      |     |   |   |         |        |        |
| HETATM | 316 | H | 0 | -15.869 | 0.250  | 0.493  |
| H      |     |   |   |         |        |        |
| HETATM | 317 | C | 0 | -14.088 | 1.070  | 1.142  |
| C      |     |   |   |         |        |        |
| HETATM | 318 | C | 0 | -13.210 | 0.132  | 0.571  |
| C      |     |   |   |         |        |        |
| HETATM | 319 | H | 0 | -13.563 | -0.588 | 0.062  |
| H      |     |   |   |         |        |        |
| HETATM | 320 | C | 0 | -6.508  | -0.950 | -2.520 |
| C      |     |   |   |         |        |        |
| HETATM | 321 | S | 0 | -3.010  | -3.549 | 0.672  |
| S      |     |   |   |         |        |        |
| HETATM | 322 | S | 0 | -8.399  | -5.455 | 3.584  |
| S      |     |   |   |         |        |        |
| HETATM | 323 | N | 0 | -6.412  | -1.545 | 1.226  |
| N      |     |   |   |         |        |        |
| HETATM | 324 | N | 0 | -5.433  | -3.548 | -0.106 |
| N      |     |   |   |         |        |        |
| HETATM | 325 | N | 0 | -4.862  | -4.610 | -0.754 |
| N      |     |   |   |         |        |        |
| HETATM | 326 | N | 0 | -7.798  | -3.944 | 1.307  |
| N      |     |   |   |         |        |        |
| HETATM | 327 | C | 0 | -6.981  | -0.568 | 1.917  |
| C      |     |   |   |         |        |        |
| HETATM | 328 | H | 0 | -7.912  | -0.409 | 1.805  |
| H      |     |   |   |         |        |        |
| HETATM | 329 | C | 0 | -6.271  | 0.234  | 2.800  |
| C      |     |   |   |         |        |        |
| HETATM | 330 | H | 0 | -6.710  | 0.940  | 3.259  |
| H      |     |   |   |         |        |        |
| HETATM | 331 | C | 0 | -4.937  | 0.009  | 3.010  |
| C      |     |   |   |         |        |        |
| HETATM | 332 | H | 0 | -4.440  | 0.553  | 3.611  |
| H      |     |   |   |         |        |        |
| HETATM | 333 | C | 0 | -4.325  | -1.028 | 2.329  |
| C      |     |   |   |         |        |        |
| HETATM | 334 | H | 0 | -3.405  | -1.220 | 2.462  |
| H      |     |   |   |         |        |        |
| HETATM | 335 | C | 0 | -5.086  | -1.786 | 1.447  |
| C      |     |   |   |         |        |        |
| HETATM | 336 | C | 0 | -4.602  | -2.908 | 0.677  |
| C      |     |   |   |         |        |        |
| HETATM | 337 | C | 0 | -3.598  | -4.734 | -0.464 |
| C      |     |   |   |         |        |        |
| HETATM | 338 | C | 0 | -2.702  | -5.759 | -1.022 |
| C      |     |   |   |         |        |        |
| HETATM | 339 | C | 0 | -3.226  | -6.831 | -1.779 |
| C      |     |   |   |         |        |        |
| HETATM | 340 | H | 0 | -4.165  | -6.904 | -1.902 |
| H      |     |   |   |         |        |        |

|        |     |    |   |        |         |        |
|--------|-----|----|---|--------|---------|--------|
| HETATM | 341 | C  | 0 | -2.409 | -7.757  | -2.331 |
| C      |     |    |   |        |         |        |
| HETATM | 342 | H  | 0 | -2.783 | -8.476  | -2.828 |
| H      |     |    |   |        |         |        |
| HETATM | 343 | C  | 0 | -0.998 | -7.671  | -2.179 |
| C      |     |    |   |        |         |        |
| HETATM | 344 | C  | 0 | -0.110 | -8.599  | -2.761 |
| C      |     |    |   |        |         |        |
| HETATM | 345 | H  | 0 | -0.456 | -9.323  | -3.269 |
| H      |     |    |   |        |         |        |
| HETATM | 346 | C  | 0 | 1.247  | -8.472  | -2.602 |
| C      |     |    |   |        |         |        |
| HETATM | 347 | H  | 0 | 1.829  | -9.109  | -3.001 |
| H      |     |    |   |        |         |        |
| HETATM | 348 | C  | 0 | 1.784  | -7.406  | -1.854 |
| C      |     |    |   |        |         |        |
| HETATM | 349 | H  | 0 | 2.726  | -7.327  | -1.748 |
| H      |     |    |   |        |         |        |
| HETATM | 350 | C  | 0 | 0.954  | -6.488  | -1.280 |
| C      |     |    |   |        |         |        |
| HETATM | 351 | H  | 0 | 1.323  | -5.773  | -0.777 |
| H      |     |    |   |        |         |        |
| HETATM | 352 | C  | 0 | -0.458 | -6.591  | -1.427 |
| C      |     |    |   |        |         |        |
| HETATM | 353 | C  | 0 | -1.337 | -5.654  | -0.856 |
| C      |     |    |   |        |         |        |
| HETATM | 354 | H  | 0 | -0.983 | -4.934  | -0.346 |
| H      |     |    |   |        |         |        |
| HETATM | 355 | C  | 0 | -8.039 | -4.571  | 2.235  |
| C      |     |    |   |        |         |        |
| HETATM | 356 | Fe | 0 | -3.433 | -14.506 | 0.330  |
| Fe     |     |    |   |        |         |        |
| HETATM | 357 | S  | 0 | -7.697 | -13.718 | -0.484 |
| S      |     |    |   |        |         |        |
| HETATM | 358 | S  | 0 | -2.306 | -11.813 | -3.397 |
| S      |     |    |   |        |         |        |
| HETATM | 359 | N  | 0 | -4.294 | -15.721 | -1.039 |
| N      |     |    |   |        |         |        |
| HETATM | 360 | N  | 0 | -5.273 | -13.719 | 0.293  |
| N      |     |    |   |        |         |        |
| HETATM | 361 | N  | 0 | -5.845 | -12.657 | 0.942  |
| N      |     |    |   |        |         |        |
| HETATM | 362 | N  | 0 | -2.909 | -13.323 | -1.120 |
| N      |     |    |   |        |         |        |
| HETATM | 363 | C  | 0 | -3.724 | -16.699 | -1.730 |
| C      |     |    |   |        |         |        |
| HETATM | 364 | H  | 0 | -2.794 | -16.858 | -1.617 |
| H      |     |    |   |        |         |        |
| HETATM | 365 | C  | 0 | -4.436 | -17.501 | -2.612 |
| C      |     |    |   |        |         |        |
| HETATM | 366 | H  | 0 | -3.995 | -18.207 | -3.073 |
| H      |     |    |   |        |         |        |
| HETATM | 367 | C  | 0 | -5.770 | -17.276 | -2.823 |
| C      |     |    |   |        |         |        |
| HETATM | 368 | H  | 0 | -6.266 | -17.821 | -3.423 |
| H      |     |    |   |        |         |        |



|        |     |   |   |         |         |        |
|--------|-----|---|---|---------|---------|--------|
| HETATM | 369 | C | 0 | -6.380  | -16.238 | -2.142 |
| C      |     |   |   |         |         |        |
| HETATM | 370 | H | 0 | -7.302  | -16.047 | -2.274 |
| H      |     |   |   |         |         |        |
| HETATM | 371 | C | 0 | -5.620  | -15.481 | -1.259 |
| C      |     |   |   |         |         |        |
| HETATM | 372 | C | 0 | -6.104  | -14.360 | -0.490 |
| C      |     |   |   |         |         |        |
| HETATM | 373 | C | 0 | -7.109  | -12.533 | 0.652  |
| C      |     |   |   |         |         |        |
| HETATM | 374 | C | 0 | -8.003  | -11.508 | 1.209  |
| C      |     |   |   |         |         |        |
| HETATM | 375 | C | 0 | -7.479  | -10.435 | 1.966  |
| C      |     |   |   |         |         |        |
| HETATM | 376 | H | 0 | -6.541  | -10.364 | 2.089  |
| H      |     |   |   |         |         |        |
| HETATM | 377 | C | 0 | -8.297  | -9.510  | 2.518  |
| C      |     |   |   |         |         |        |
| HETATM | 378 | H | 0 | -7.924  | -8.791  | 3.016  |
| H      |     |   |   |         |         |        |
| HETATM | 379 | C | 0 | -9.708  | -9.596  | 2.367  |
| C      |     |   |   |         |         |        |
| HETATM | 380 | C | 0 | -10.596 | -8.667  | 2.948  |
| C      |     |   |   |         |         |        |
| HETATM | 381 | H | 0 | -10.250 | -7.944  | 3.456  |
| H      |     |   |   |         |         |        |
| HETATM | 382 | C | 0 | -11.952 | -8.795  | 2.790  |
| C      |     |   |   |         |         |        |
| HETATM | 383 | H | 0 | -12.535 | -8.158  | 3.189  |
| H      |     |   |   |         |         |        |
| HETATM | 384 | C | 0 | -12.490 | -9.862  | 2.040  |
| C      |     |   |   |         |         |        |
| HETATM | 385 | H | 0 | -13.431 | -9.940  | 1.936  |
| H      |     |   |   |         |         |        |
| HETATM | 386 | C | 0 | -11.660 | -10.779 | 1.467  |
| C      |     |   |   |         |         |        |
| HETATM | 387 | H | 0 | -12.029 | -11.494 | 0.964  |
| H      |     |   |   |         |         |        |
| HETATM | 388 | C | 0 | -10.248 | -10.676 | 1.613  |
| C      |     |   |   |         |         |        |
| HETATM | 389 | C | 0 | -9.369  | -11.613 | 1.044  |
| C      |     |   |   |         |         |        |
| HETATM | 390 | H | 0 | -9.723  | -12.333 | 0.534  |
| H      |     |   |   |         |         |        |
| HETATM | 391 | C | 0 | -2.668  | -12.696 | -2.049 |
| C      |     |   |   |         |         |        |
| HETATM | 392 | S | 0 | 0.830   | -15.294 | 1.143  |
| S      |     |   |   |         |         |        |
| HETATM | 393 | S | 0 | -4.560  | -17.199 | 4.056  |
| S      |     |   |   |         |         |        |
| HETATM | 394 | N | 0 | -2.572  | -13.291 | 1.698  |
| N      |     |   |   |         |         |        |
| HETATM | 395 | N | 0 | -1.593  | -15.293 | 0.366  |
| N      |     |   |   |         |         |        |
| HETATM | 396 | N | 0 | -1.021  | -16.355 | -0.283 |
| N      |     |   |   |         |         |        |

|        |     |   |   |        |         |        |
|--------|-----|---|---|--------|---------|--------|
| HETATM | 397 | N | 0 | -3.957 | -15.689 | 1.779  |
| N      |     |   |   |        |         |        |
| HETATM | 398 | C | 0 | -3.142 | -12.313 | 2.389  |
| C      |     |   |   |        |         |        |
| HETATM | 399 | H | 0 | -4.072 | -12.154 | 2.276  |
| H      |     |   |   |        |         |        |
| HETATM | 400 | C | 0 | -2.430 | -11.511 | 3.271  |
| C      |     |   |   |        |         |        |
| HETATM | 401 | H | 0 | -2.871 | -10.806 | 3.732  |
| H      |     |   |   |        |         |        |
| HETATM | 402 | C | 0 | -1.096 | -11.736 | 3.482  |
| C      |     |   |   |        |         |        |
| HETATM | 403 | H | 0 | -0.601 | -11.192 | 4.082  |
| H      |     |   |   |        |         |        |
| HETATM | 404 | C | 0 | -0.486 | -12.773 | 2.801  |
| C      |     |   |   |        |         |        |
| HETATM | 405 | H | 0 | 0.435  | -12.965 | 2.933  |
| H      |     |   |   |        |         |        |
| HETATM | 406 | C | 0 | -1.246 | -13.531 | 1.918  |
| C      |     |   |   |        |         |        |
| HETATM | 407 | C | 0 | -0.762 | -14.653 | 1.149  |
| C      |     |   |   |        |         |        |
| HETATM | 408 | C | 0 | 0.242  | -16.479 | 0.007  |
| C      |     |   |   |        |         |        |
| HETATM | 409 | C | 0 | 1.137  | -17.504 | -0.550 |
| C      |     |   |   |        |         |        |
| HETATM | 410 | C | 0 | 0.613  | -18.577 | -1.307 |
| C      |     |   |   |        |         |        |
| HETATM | 411 | H | 0 | -0.326 | -18.649 | -1.430 |
| H      |     |   |   |        |         |        |
| HETATM | 412 | C | 0 | 1.431  | -19.502 | -1.859 |
| C      |     |   |   |        |         |        |
| HETATM | 413 | H | 0 | 1.057  | -20.221 | -2.357 |
| H      |     |   |   |        |         |        |
| HETATM | 414 | C | 0 | 2.842  | -19.416 | -1.708 |
| C      |     |   |   |        |         |        |
| HETATM | 415 | C | 0 | 3.730  | -20.345 | -2.289 |
| C      |     |   |   |        |         |        |
| HETATM | 416 | H | 0 | 3.384  | -21.069 | -2.797 |
| H      |     |   |   |        |         |        |
| HETATM | 417 | C | 0 | 5.086  | -20.217 | -2.131 |
| C      |     |   |   |        |         |        |
| HETATM | 418 | H | 0 | 5.669  | -20.854 | -2.530 |
| H      |     |   |   |        |         |        |
| HETATM | 419 | C | 0 | 5.624  | -19.151 | -1.381 |
| C      |     |   |   |        |         |        |
| HETATM | 420 | H | 0 | 6.565  | -19.072 | -1.277 |
| H      |     |   |   |        |         |        |
| HETATM | 421 | C | 0 | 4.793  | -18.234 | -0.808 |
| C      |     |   |   |        |         |        |
| HETATM | 422 | H | 0 | 5.162  | -17.517 | -0.305 |
| H      |     |   |   |        |         |        |
| HETATM | 423 | C | 0 | 3.382  | -18.336 | -0.954 |
| C      |     |   |   |        |         |        |
| HETATM | 424 | C | 0 | 2.503  | -17.399 | -0.385 |
| C      |     |   |   |        |         |        |

|        |     |    |   |         |         |        |
|--------|-----|----|---|---------|---------|--------|
| HETATM | 425 | H  | 0 | 2.857   | -16.680 | 0.125  |
| H      |     |    |   |         |         |        |
| HETATM | 426 | C  | 0 | -4.199  | -16.317 | 2.708  |
| C      |     |    |   |         |         |        |
| HETATM | 427 | Fe | 0 | -3.840  | 11.746  | -0.472 |
| Fe     |     |    |   |         |         |        |
| HETATM | 428 | S  | 0 | -8.103  | 12.534  | -1.286 |
| S      |     |    |   |         |         |        |
| HETATM | 429 | S  | 0 | -2.713  | 14.439  | -4.197 |
| S      |     |    |   |         |         |        |
| HETATM | 430 | N  | 0 | -4.701  | 10.530  | -1.840 |
| N      |     |    |   |         |         |        |
| HETATM | 431 | N  | 0 | -5.679  | 12.532  | -0.508 |
| N      |     |    |   |         |         |        |
| HETATM | 432 | N  | 0 | -6.251  | 13.594  | 0.140  |
| N      |     |    |   |         |         |        |
| HETATM | 433 | N  | 0 | -3.316  | 12.929  | -1.921 |
| N      |     |    |   |         |         |        |
| HETATM | 434 | C  | 0 | -4.131  | 9.552   | -2.531 |
| C      |     |    |   |         |         |        |
| HETATM | 435 | H  | 0 | -3.201  | 9.394   | -2.419 |
| H      |     |    |   |         |         |        |
| HETATM | 436 | C  | 0 | -4.843  | 8.750   | -3.414 |
| C      |     |    |   |         |         |        |
| HETATM | 437 | H  | 0 | -4.403  | 8.045   | -3.873 |
| H      |     |    |   |         |         |        |
| HETATM | 438 | C  | 0 | -6.177  | 8.976   | -3.625 |
| C      |     |    |   |         |         |        |
| HETATM | 439 | H  | 0 | -6.672  | 8.431   | -4.224 |
| H      |     |    |   |         |         |        |
| HETATM | 440 | C  | 0 | -6.787  | 10.012  | -2.943 |
| C      |     |    |   |         |         |        |
| HETATM | 441 | H  | 0 | -7.708  | 10.204  | -3.076 |
| H      |     |    |   |         |         |        |
| HETATM | 442 | C  | 0 | -6.027  | 10.770  | -2.060 |
| C      |     |    |   |         |         |        |
| HETATM | 443 | C  | 0 | -6.511  | 11.892  | -1.291 |
| C      |     |    |   |         |         |        |
| HETATM | 444 | C  | 0 | -7.515  | 13.719  | -0.150 |
| C      |     |    |   |         |         |        |
| HETATM | 445 | C  | 0 | -8.410  | 14.743  | 0.408  |
| C      |     |    |   |         |         |        |
| HETATM | 446 | C  | 0 | -7.887  | 15.816  | 1.165  |
| C      |     |    |   |         |         |        |
| HETATM | 447 | H  | 0 | -6.947  | 15.888  | 1.288  |
| H      |     |    |   |         |         |        |
| HETATM | 448 | C  | 0 | -8.704  | 16.741  | 1.718  |
| C      |     |    |   |         |         |        |
| HETATM | 449 | H  | 0 | -8.330  | 17.460  | 2.214  |
| H      |     |    |   |         |         |        |
| HETATM | 450 | C  | 0 | -10.115 | 16.655  | 1.566  |
| C      |     |    |   |         |         |        |
| HETATM | 451 | C  | 0 | -11.003 | 17.584  | 2.147  |
| C      |     |    |   |         |         |        |
| HETATM | 452 | H  | 0 | -10.657 | 18.308  | 2.655  |
| H      |     |    |   |         |         |        |

|        |     |   |   |         |        |        |
|--------|-----|---|---|---------|--------|--------|
| HETATM | 453 | C | 0 | -12.359 | 17.457 | 1.988  |
| C      |     |   |   |         |        |        |
| HETATM | 454 | H | 0 | -12.942 | 18.094 | 2.387  |
| H      |     |   |   |         |        |        |
| HETATM | 455 | C | 0 | -12.897 | 16.390 | 1.240  |
| C      |     |   |   |         |        |        |
| HETATM | 456 | H | 0 | -13.838 | 16.311 | 1.134  |
| H      |     |   |   |         |        |        |
| HETATM | 457 | C | 0 | -12.066 | 15.473 | 0.666  |
| C      |     |   |   |         |        |        |
| HETATM | 458 | H | 0 | -12.435 | 14.757 | 0.163  |
| H      |     |   |   |         |        |        |
| HETATM | 459 | C | 0 | -10.655 | 15.575 | 0.813  |
| C      |     |   |   |         |        |        |
| HETATM | 460 | C | 0 | -9.776  | 14.639 | 0.242  |
| C      |     |   |   |         |        |        |
| HETATM | 461 | H | 0 | -10.129 | 13.918 | -0.267 |
| H      |     |   |   |         |        |        |
| HETATM | 462 | C | 0 | -3.074  | 13.556 | -2.849 |
| C      |     |   |   |         |        |        |
| HETATM | 463 | S | 0 | 0.423   | 10.956 | 0.342  |
| S      |     |   |   |         |        |        |
| HETATM | 464 | S | 0 | -4.967  | 9.051  | 3.254  |
| S      |     |   |   |         |        |        |
| HETATM | 465 | N | 0 | -2.979  | 12.961 | 0.897  |
| N      |     |   |   |         |        |        |
| HETATM | 466 | N | 0 | -2.000  | 10.959 | -0.435 |
| N      |     |   |   |         |        |        |
| HETATM | 467 | N | 0 | -1.428  | 9.896  | -1.083 |
| N      |     |   |   |         |        |        |
| HETATM | 468 | N | 0 | -4.364  | 10.563 | 0.978  |
| N      |     |   |   |         |        |        |
| HETATM | 469 | C | 0 | -3.549  | 13.938 | 1.587  |
| C      |     |   |   |         |        |        |
| HETATM | 470 | H | 0 | -4.479  | 14.097 | 1.475  |
| H      |     |   |   |         |        |        |
| HETATM | 471 | C | 0 | -2.837  | 14.740 | 2.470  |
| C      |     |   |   |         |        |        |
| HETATM | 472 | H | 0 | -3.277  | 15.445 | 2.930  |
| H      |     |   |   |         |        |        |
| HETATM | 473 | C | 0 | -1.503  | 14.514 | 2.681  |
| C      |     |   |   |         |        |        |
| HETATM | 474 | H | 0 | -1.007  | 15.059 | 3.281  |
| H      |     |   |   |         |        |        |
| HETATM | 475 | C | 0 | -0.893  | 13.478 | 2.000  |
| C      |     |   |   |         |        |        |
| HETATM | 476 | H | 0 | 0.029   | 13.287 | 2.133  |
| H      |     |   |   |         |        |        |
| HETATM | 477 | C | 0 | -1.653  | 12.720 | 1.116  |
| C      |     |   |   |         |        |        |
| HETATM | 478 | C | 0 | -1.168  | 11.598 | 0.348  |
| C      |     |   |   |         |        |        |
| HETATM | 479 | C | 0 | -0.164  | 9.772  | -0.794 |
| C      |     |   |   |         |        |        |
| HETATM | 480 | C | 0 | 0.730   | 8.747  | -1.352 |
| C      |     |   |   |         |        |        |

|        |     |    |   |        |        |        |
|--------|-----|----|---|--------|--------|--------|
| HETATM | 481 | C  | 0 | 0.206  | 7.675  | -2.108 |
| C      |     |    |   |        |        |        |
| HETATM | 482 | H  | 0 | -0.732 | 7.602  | -2.231 |
| H      |     |    |   |        |        |        |
| HETATM | 483 | C  | 0 | 1.024  | 6.749  | -2.661 |
| C      |     |    |   |        |        |        |
| HETATM | 484 | H  | 0 | 0.651  | 6.031  | -3.157 |
| H      |     |    |   |        |        |        |
| HETATM | 485 | C  | 0 | 2.435  | 6.835  | -2.509 |
| C      |     |    |   |        |        |        |
| HETATM | 486 | C  | 0 | 3.323  | 5.906  | -3.091 |
| C      |     |    |   |        |        |        |
| HETATM | 487 | H  | 0 | 2.977  | 5.183  | -3.598 |
| H      |     |    |   |        |        |        |
| HETATM | 488 | C  | 0 | 4.679  | 6.034  | -2.932 |
| C      |     |    |   |        |        |        |
| HETATM | 489 | H  | 0 | 5.262  | 5.398  | -3.330 |
| H      |     |    |   |        |        |        |
| HETATM | 490 | C  | 0 | 5.218  | 7.100  | -2.183 |
| C      |     |    |   |        |        |        |
| HETATM | 491 | H  | 0 | 6.158  | 7.179  | -2.077 |
| H      |     |    |   |        |        |        |
| HETATM | 492 | C  | 0 | 4.387  | 8.018  | -1.609 |
| C      |     |    |   |        |        |        |
| HETATM | 493 | H  | 0 | 4.756  | 8.734  | -1.106 |
| H      |     |    |   |        |        |        |
| HETATM | 494 | C  | 0 | 2.975  | 7.915  | -1.756 |
| C      |     |    |   |        |        |        |
| HETATM | 495 | C  | 0 | 2.096  | 8.852  | -1.185 |
| C      |     |    |   |        |        |        |
| HETATM | 496 | H  | 0 | 2.450  | 9.572  | -0.676 |
| H      |     |    |   |        |        |        |
| HETATM | 497 | C  | 0 | -4.605 | 9.935  | 1.906  |
| C      |     |    |   |        |        |        |
| HETATM | 498 | Fe | 0 | 0.000  | 0.000  | -0.001 |
| Fe     |     |    |   |        |        |        |
| HETATM | 499 | S  | 0 | -4.466 | 0.839  | -0.841 |
| S      |     |    |   |        |        |        |
| HETATM | 500 | S  | 0 | 1.096  | 2.903  | -3.890 |
| S      |     |    |   |        |        |        |
| HETATM | 501 | N  | 0 | -1.025 | -1.328 | -1.377 |
| N      |     |    |   |        |        |        |
| HETATM | 502 | N  | 0 | -1.961 | 0.898  | -0.118 |
| N      |     |    |   |        |        |        |
| HETATM | 503 | N  | 0 | -2.531 | 1.989  | 0.542  |
| N      |     |    |   |        |        |        |
| HETATM | 504 | N  | 0 | 0.605  | 1.179  | -1.620 |
| N      |     |    |   |        |        |        |
| HETATM | 505 | C  | 0 | -0.475 | -2.397 | -1.997 |
| C      |     |    |   |        |        |        |
| HETATM | 506 | H  | 0 | 0.566  | -2.604 | -1.746 |
| H      |     |    |   |        |        |        |
| HETATM | 507 | C  | 0 | -1.214 | -3.187 | -2.914 |
| C      |     |    |   |        |        |        |
| HETATM | 508 | H  | 0 | -0.746 | -4.044 | -3.394 |
| H      |     |    |   |        |        |        |

|        |     |   |   |         |        |        |
|--------|-----|---|---|---------|--------|--------|
| HETATM | 509 | C | 0 | -2.554  | -2.833 | -3.188 |
| C      |     |   |   |         |        |        |
| HETATM | 510 | H | 0 | -3.151  | -3.412 | -3.893 |
| H      |     |   |   |         |        |        |
| HETATM | 511 | C | 0 | -3.126  | -1.710 | -2.542 |
| C      |     |   |   |         |        |        |
| HETATM | 512 | H | 0 | -4.140  | -1.396 | -2.772 |
| H      |     |   |   |         |        |        |
| HETATM | 513 | C | 0 | -2.323  | -0.986 | -1.634 |
| C      |     |   |   |         |        |        |
| HETATM | 514 | C | 0 | -2.798  | 0.203  | -0.879 |
| C      |     |   |   |         |        |        |
| HETATM | 515 | C | 0 | -3.828  | 2.112  | 0.283  |
| C      |     |   |   |         |        |        |
| HETATM | 516 | C | 0 | -4.711  | 3.145  | 0.855  |
| C      |     |   |   |         |        |        |
| HETATM | 517 | C | 0 | -4.148  | 4.241  | 1.609  |
| C      |     |   |   |         |        |        |
| HETATM | 518 | H | 0 | -3.066  | 4.301  | 1.726  |
| H      |     |   |   |         |        |        |
| HETATM | 519 | C | 0 | -4.988  | 5.192  | 2.182  |
| C      |     |   |   |         |        |        |
| HETATM | 520 | H | 0 | -4.579  | 6.027  | 2.754  |
| H      |     |   |   |         |        |        |
| HETATM | 521 | C | 0 | -6.423  | 5.086  | 2.049  |
| C      |     |   |   |         |        |        |
| HETATM | 522 | C | 0 | -7.319  | 6.034  | 2.659  |
| C      |     |   |   |         |        |        |
| HETATM | 523 | H | 0 | -6.897  | 6.857  | 3.238  |
| H      |     |   |   |         |        |        |
| HETATM | 524 | C | 0 | -8.700  | 5.911  | 2.490  |
| C      |     |   |   |         |        |        |
| HETATM | 525 | H | 0 | -9.382  | 6.617  | 2.964  |
| H      |     |   |   |         |        |        |
| HETATM | 526 | C | 0 | -9.251  | 4.834  | 1.708  |
| C      |     |   |   |         |        |        |
| HETATM | 527 | H | 0 | -10.333 | 4.761  | 1.605  |
| H      |     |   |   |         |        |        |
| HETATM | 528 | C | 0 | -8.408  | 3.894  | 1.116  |
| C      |     |   |   |         |        |        |
| HETATM | 529 | H | 0 | -8.812  | 3.058  | 0.543  |
| H      |     |   |   |         |        |        |
| HETATM | 530 | C | 0 | -6.980  | 4.002  | 1.273  |
| C      |     |   |   |         |        |        |
| HETATM | 531 | C | 0 | -6.096  | 3.047  | 0.679  |
| C      |     |   |   |         |        |        |
| HETATM | 532 | H | 0 | -6.532  | 2.236  | 0.095  |
| H      |     |   |   |         |        |        |
| HETATM | 533 | C | 0 | 0.793   | 1.886  | -2.561 |
| C      |     |   |   |         |        |        |
| HETATM | 534 | S | 0 | 4.466   | -0.839 | 0.842  |
| S      |     |   |   |         |        |        |
| HETATM | 535 | S | 0 | -1.096  | -2.903 | 3.889  |
| S      |     |   |   |         |        |        |
| HETATM | 536 | N | 0 | 1.026   | 1.328  | 1.377  |
| N      |     |   |   |         |        |        |

|        |     |   |   |        |        |        |
|--------|-----|---|---|--------|--------|--------|
| HETATM | 537 | N | 0 | 1.961  | -0.897 | 0.117  |
| N      |     |   |   |        |        |        |
| HETATM | 538 | N | 0 | 2.531  | -1.989 | -0.543 |
| N      |     |   |   |        |        |        |
| HETATM | 539 | N | 0 | -0.605 | -1.178 | 1.619  |
| N      |     |   |   |        |        |        |
| HETATM | 540 | C | 0 | 0.475  | 2.398  | 1.997  |
| C      |     |   |   |        |        |        |
| HETATM | 541 | H | 0 | -0.566 | 2.605  | 1.744  |
| H      |     |   |   |        |        |        |
| HETATM | 542 | C | 0 | 1.214  | 3.187  | 2.914  |
| C      |     |   |   |        |        |        |
| HETATM | 543 | H | 0 | 0.746  | 4.045  | 3.394  |
| H      |     |   |   |        |        |        |
| HETATM | 544 | C | 0 | 2.554  | 2.832  | 3.189  |
| C      |     |   |   |        |        |        |
| HETATM | 545 | H | 0 | 3.150  | 3.411  | 3.894  |
| H      |     |   |   |        |        |        |
| HETATM | 546 | C | 0 | 3.125  | 1.709  | 2.543  |
| C      |     |   |   |        |        |        |
| HETATM | 547 | H | 0 | 4.139  | 1.394  | 2.774  |
| H      |     |   |   |        |        |        |
| HETATM | 548 | C | 0 | 2.323  | 0.986  | 1.634  |
| C      |     |   |   |        |        |        |
| HETATM | 549 | C | 0 | 2.798  | -0.203 | 0.879  |
| C      |     |   |   |        |        |        |
| HETATM | 550 | C | 0 | 3.828  | -2.112 | -0.284 |
| C      |     |   |   |        |        |        |
| HETATM | 551 | C | 0 | 4.711  | -3.145 | -0.855 |
| C      |     |   |   |        |        |        |
| HETATM | 552 | C | 0 | 4.148  | -4.241 | -1.609 |
| C      |     |   |   |        |        |        |
| HETATM | 553 | H | 0 | 3.066  | -4.300 | -1.727 |
| H      |     |   |   |        |        |        |
| HETATM | 554 | C | 0 | 4.988  | -5.192 | -2.182 |
| C      |     |   |   |        |        |        |
| HETATM | 555 | H | 0 | 4.579  | -6.027 | -2.755 |
| H      |     |   |   |        |        |        |
| HETATM | 556 | C | 0 | 6.423  | -5.086 | -2.049 |
| C      |     |   |   |        |        |        |
| HETATM | 557 | C | 0 | 7.319  | -6.034 | -2.659 |
| C      |     |   |   |        |        |        |
| HETATM | 558 | H | 0 | 6.897  | -6.856 | -3.238 |
| H      |     |   |   |        |        |        |
| HETATM | 559 | C | 0 | 8.700  | -5.911 | -2.490 |
| C      |     |   |   |        |        |        |
| HETATM | 560 | H | 0 | 9.382  | -6.617 | -2.964 |
| H      |     |   |   |        |        |        |
| HETATM | 561 | C | 0 | 9.251  | -4.834 | -1.707 |
| C      |     |   |   |        |        |        |
| HETATM | 562 | H | 0 | 10.333 | -4.761 | -1.604 |
| H      |     |   |   |        |        |        |
| HETATM | 563 | C | 0 | 8.408  | -3.894 | -1.116 |
| C      |     |   |   |        |        |        |
| HETATM | 564 | H | 0 | 8.812  | -3.058 | -0.543 |
| H      |     |   |   |        |        |        |

|        |     |    |   |        |         |        |
|--------|-----|----|---|--------|---------|--------|
| HETATM | 565 | C  | 0 | 6.980  | -4.002  | -1.273 |
| C      |     |    |   |        |         |        |
| HETATM | 566 | C  | 0 | 6.096  | -3.047  | -0.679 |
| C      |     |    |   |        |         |        |
| HETATM | 567 | H  | 0 | 6.532  | -2.236  | -0.095 |
| H      |     |    |   |        |         |        |
| HETATM | 568 | C  | 0 | -0.793 | -1.886  | 2.560  |
| C      |     |    |   |        |         |        |
| HETATM | 569 | Fe | 0 | 3.840  | -11.746 | 0.472  |
| Fe     |     |    |   |        |         |        |
| HETATM | 570 | S  | 0 | -0.423 | -10.956 | -0.342 |
| S      |     |    |   |        |         |        |
| HETATM | 571 | S  | 0 | 4.967  | -9.051  | -3.254 |
| S      |     |    |   |        |         |        |
| HETATM | 572 | N  | 0 | 2.979  | -12.961 | -0.897 |
| N      |     |    |   |        |         |        |
| HETATM | 573 | N  | 0 | 2.000  | -10.959 | 0.435  |
| N      |     |    |   |        |         |        |
| HETATM | 574 | N  | 0 | 1.428  | -9.896  | 1.083  |
| N      |     |    |   |        |         |        |
| HETATM | 575 | N  | 0 | 4.364  | -10.563 | -0.978 |
| N      |     |    |   |        |         |        |
| HETATM | 576 | C  | 0 | 3.549  | -13.938 | -1.587 |
| C      |     |    |   |        |         |        |
| HETATM | 577 | H  | 0 | 4.479  | -14.097 | -1.475 |
| H      |     |    |   |        |         |        |
| HETATM | 578 | C  | 0 | 2.837  | -14.740 | -2.470 |
| C      |     |    |   |        |         |        |
| HETATM | 579 | H  | 0 | 3.277  | -15.445 | -2.930 |
| H      |     |    |   |        |         |        |
| HETATM | 580 | C  | 0 | 1.503  | -14.514 | -2.681 |
| C      |     |    |   |        |         |        |
| HETATM | 581 | H  | 0 | 1.007  | -15.059 | -3.281 |
| H      |     |    |   |        |         |        |
| HETATM | 582 | C  | 0 | 0.893  | -13.478 | -2.000 |
| C      |     |    |   |        |         |        |
| HETATM | 583 | H  | 0 | -0.029 | -13.287 | -2.133 |
| H      |     |    |   |        |         |        |
| HETATM | 584 | C  | 0 | 1.653  | -12.720 | -1.116 |
| C      |     |    |   |        |         |        |
| HETATM | 585 | C  | 0 | 1.168  | -11.598 | -0.348 |
| C      |     |    |   |        |         |        |
| HETATM | 586 | C  | 0 | 0.164  | -9.772  | 0.794  |
| C      |     |    |   |        |         |        |
| HETATM | 587 | C  | 0 | -0.730 | -8.747  | 1.352  |
| C      |     |    |   |        |         |        |
| HETATM | 588 | C  | 0 | -0.206 | -7.675  | 2.109  |
| C      |     |    |   |        |         |        |
| HETATM | 589 | H  | 0 | 0.732  | -7.602  | 2.231  |
| H      |     |    |   |        |         |        |
| HETATM | 590 | C  | 0 | -1.024 | -6.749  | 2.661  |
| C      |     |    |   |        |         |        |
| HETATM | 591 | H  | 0 | -0.651 | -6.031  | 3.157  |
| H      |     |    |   |        |         |        |
| HETATM | 592 | C  | 0 | -2.435 | -6.835  | 2.509  |
| C      |     |    |   |        |         |        |



|        |     |   |   |        |         |        |
|--------|-----|---|---|--------|---------|--------|
| HETATM | 593 | C | 0 | -3.323 | -5.906  | 3.091  |
| C      |     |   |   |        |         |        |
| HETATM | 594 | H | 0 | -2.977 | -5.183  | 3.599  |
| H      |     |   |   |        |         |        |
| HETATM | 595 | C | 0 | -4.679 | -6.034  | 2.933  |
| C      |     |   |   |        |         |        |
| HETATM | 596 | H | 0 | -5.262 | -5.398  | 3.330  |
| H      |     |   |   |        |         |        |
| HETATM | 597 | C | 0 | -5.218 | -7.100  | 2.183  |
| C      |     |   |   |        |         |        |
| HETATM | 598 | H | 0 | -6.158 | -7.179  | 2.077  |
| H      |     |   |   |        |         |        |
| HETATM | 599 | C | 0 | -4.387 | -8.018  | 1.609  |
| C      |     |   |   |        |         |        |
| HETATM | 600 | H | 0 | -4.756 | -8.734  | 1.107  |
| H      |     |   |   |        |         |        |
| HETATM | 601 | C | 0 | -2.975 | -7.915  | 1.756  |
| C      |     |   |   |        |         |        |
| HETATM | 602 | C | 0 | -2.096 | -8.852  | 1.185  |
| C      |     |   |   |        |         |        |
| HETATM | 603 | H | 0 | -2.450 | -9.572  | 0.676  |
| H      |     |   |   |        |         |        |
| HETATM | 604 | C | 0 | 4.605  | -9.935  | -1.906 |
| C      |     |   |   |        |         |        |
| HETATM | 605 | S | 0 | 8.103  | -12.534 | 1.286  |
| S      |     |   |   |        |         |        |
| HETATM | 606 | S | 0 | 2.713  | -14.439 | 4.197  |
| S      |     |   |   |        |         |        |
| HETATM | 607 | N | 0 | 4.701  | -10.530 | 1.840  |
| N      |     |   |   |        |         |        |
| HETATM | 608 | N | 0 | 5.679  | -12.532 | 0.508  |
| N      |     |   |   |        |         |        |
| HETATM | 609 | N | 0 | 6.251  | -13.594 | -0.140 |
| N      |     |   |   |        |         |        |
| HETATM | 610 | N | 0 | 3.316  | -12.928 | 1.921  |
| N      |     |   |   |        |         |        |
| HETATM | 611 | C | 0 | 4.131  | -9.552  | 2.531  |
| C      |     |   |   |        |         |        |
| HETATM | 612 | H | 0 | 3.201  | -9.394  | 2.419  |
| H      |     |   |   |        |         |        |
| HETATM | 613 | C | 0 | 4.843  | -8.750  | 3.414  |
| C      |     |   |   |        |         |        |
| HETATM | 614 | H | 0 | 4.403  | -8.045  | 3.873  |
| H      |     |   |   |        |         |        |
| HETATM | 615 | C | 0 | 6.177  | -8.976  | 3.625  |
| C      |     |   |   |        |         |        |
| HETATM | 616 | H | 0 | 6.672  | -8.431  | 4.224  |
| H      |     |   |   |        |         |        |
| HETATM | 617 | C | 0 | 6.787  | -10.012 | 2.943  |
| C      |     |   |   |        |         |        |
| HETATM | 618 | H | 0 | 7.708  | -10.204 | 3.076  |
| H      |     |   |   |        |         |        |
| HETATM | 619 | C | 0 | 6.027  | -10.770 | 2.061  |
| C      |     |   |   |        |         |        |
| HETATM | 620 | C | 0 | 6.511  | -11.892 | 1.291  |
| C      |     |   |   |        |         |        |

|        |     |    |   |        |         |        |
|--------|-----|----|---|--------|---------|--------|
| HETATM | 621 | C  | 0 | 7.515  | -13.719 | 0.150  |
| C      |     |    |   |        |         |        |
| HETATM | 622 | C  | 0 | 8.410  | -14.743 | -0.408 |
| C      |     |    |   |        |         |        |
| HETATM | 623 | C  | 0 | 7.886  | -15.816 | -1.165 |
| C      |     |    |   |        |         |        |
| HETATM | 624 | H  | 0 | 6.947  | -15.888 | -1.288 |
| H      |     |    |   |        |         |        |
| HETATM | 625 | C  | 0 | 8.704  | -16.741 | -1.718 |
| C      |     |    |   |        |         |        |
| HETATM | 626 | H  | 0 | 8.330  | -17.460 | -2.214 |
| H      |     |    |   |        |         |        |
| HETATM | 627 | C  | 0 | 10.115 | -16.655 | -1.565 |
| C      |     |    |   |        |         |        |
| HETATM | 628 | C  | 0 | 11.003 | -17.584 | -2.147 |
| C      |     |    |   |        |         |        |
| HETATM | 629 | H  | 0 | 10.657 | -18.308 | -2.655 |
| H      |     |    |   |        |         |        |
| HETATM | 630 | C  | 0 | 12.359 | -17.457 | -1.988 |
| C      |     |    |   |        |         |        |
| HETATM | 631 | H  | 0 | 12.942 | -18.093 | -2.387 |
| H      |     |    |   |        |         |        |
| HETATM | 632 | C  | 0 | 12.897 | -16.390 | -1.240 |
| C      |     |    |   |        |         |        |
| HETATM | 633 | H  | 0 | 13.838 | -16.311 | -1.134 |
| H      |     |    |   |        |         |        |
| HETATM | 634 | C  | 0 | 12.066 | -15.473 | -0.666 |
| C      |     |    |   |        |         |        |
| HETATM | 635 | H  | 0 | 12.435 | -14.757 | -0.163 |
| H      |     |    |   |        |         |        |
| HETATM | 636 | C  | 0 | 10.655 | -15.575 | -0.813 |
| C      |     |    |   |        |         |        |
| HETATM | 637 | C  | 0 | 9.776  | -14.639 | -0.242 |
| C      |     |    |   |        |         |        |
| HETATM | 638 | H  | 0 | 10.129 | -13.918 | 0.268  |
| H      |     |    |   |        |         |        |
| HETATM | 639 | C  | 0 | 3.074  | -13.556 | 2.849  |
| C      |     |    |   |        |         |        |
| HETATM | 640 | Fe | 0 | 3.433  | 14.506  | -0.329 |
| Fe     |     |    |   |        |         |        |
| HETATM | 641 | S  | 0 | -0.830 | 15.294  | -1.143 |
| S      |     |    |   |        |         |        |
| HETATM | 642 | S  | 0 | 4.560  | 17.199  | -4.056 |
| S      |     |    |   |        |         |        |
| HETATM | 643 | N  | 0 | 2.572  | 13.291  | -1.698 |
| N      |     |    |   |        |         |        |
| HETATM | 644 | N  | 0 | 1.593  | 15.293  | -0.366 |
| N      |     |    |   |        |         |        |
| HETATM | 645 | N  | 0 | 1.021  | 16.355  | 0.283  |
| N      |     |    |   |        |         |        |
| HETATM | 646 | N  | 0 | 3.957  | 15.689  | -1.779 |
| N      |     |    |   |        |         |        |
| HETATM | 647 | C  | 0 | 3.142  | 12.313  | -2.389 |
| C      |     |    |   |        |         |        |
| HETATM | 648 | H  | 0 | 4.072  | 12.154  | -2.276 |
| H      |     |    |   |        |         |        |

|        |     |   |   |        |        |        |
|--------|-----|---|---|--------|--------|--------|
| HETATM | 649 | C | 0 | 2.430  | 11.511 | -3.271 |
| C      |     |   |   |        |        |        |
| HETATM | 650 | H | 0 | 2.871  | 10.806 | -3.731 |
| H      |     |   |   |        |        |        |
| HETATM | 651 | C | 0 | 1.096  | 11.737 | -3.482 |
| C      |     |   |   |        |        |        |
| HETATM | 652 | H | 0 | 0.601  | 11.192 | -4.082 |
| H      |     |   |   |        |        |        |
| HETATM | 653 | C | 0 | 0.486  | 12.773 | -2.801 |
| C      |     |   |   |        |        |        |
| HETATM | 654 | H | 0 | -0.435 | 12.965 | -2.933 |
| H      |     |   |   |        |        |        |
| HETATM | 655 | C | 0 | 1.246  | 13.531 | -1.918 |
| C      |     |   |   |        |        |        |
| HETATM | 656 | C | 0 | 0.762  | 14.653 | -1.149 |
| C      |     |   |   |        |        |        |
| HETATM | 657 | C | 0 | -0.242 | 16.479 | -0.007 |
| C      |     |   |   |        |        |        |
| HETATM | 658 | C | 0 | -1.137 | 17.505 | 0.550  |
| C      |     |   |   |        |        |        |
| HETATM | 659 | C | 0 | -0.613 | 18.577 | 1.307  |
| C      |     |   |   |        |        |        |
| HETATM | 660 | H | 0 | 0.326  | 18.649 | 1.430  |
| H      |     |   |   |        |        |        |
| HETATM | 661 | C | 0 | -1.431 | 19.502 | 1.860  |
| C      |     |   |   |        |        |        |
| HETATM | 662 | H | 0 | -1.057 | 20.221 | 2.357  |
| H      |     |   |   |        |        |        |
| HETATM | 663 | C | 0 | -2.842 | 19.416 | 1.708  |
| C      |     |   |   |        |        |        |
| HETATM | 664 | C | 0 | -3.730 | 20.345 | 2.289  |
| C      |     |   |   |        |        |        |
| HETATM | 665 | H | 0 | -3.384 | 21.069 | 2.797  |
| H      |     |   |   |        |        |        |
| HETATM | 666 | C | 0 | -5.086 | 20.217 | 2.131  |
| C      |     |   |   |        |        |        |
| HETATM | 667 | H | 0 | -5.669 | 20.854 | 2.530  |
| H      |     |   |   |        |        |        |
| HETATM | 668 | C | 0 | -5.624 | 19.151 | 1.381  |
| C      |     |   |   |        |        |        |
| HETATM | 669 | H | 0 | -6.565 | 19.072 | 1.277  |
| H      |     |   |   |        |        |        |
| HETATM | 670 | C | 0 | -4.793 | 18.234 | 0.808  |
| C      |     |   |   |        |        |        |
| HETATM | 671 | H | 0 | -5.162 | 17.517 | 0.305  |
| H      |     |   |   |        |        |        |
| HETATM | 672 | C | 0 | -3.382 | 18.336 | 0.954  |
| C      |     |   |   |        |        |        |
| HETATM | 673 | C | 0 | -2.503 | 17.399 | 0.385  |
| C      |     |   |   |        |        |        |
| HETATM | 674 | H | 0 | -2.857 | 16.680 | -0.125 |
| H      |     |   |   |        |        |        |
| HETATM | 675 | C | 0 | 4.199  | 16.317 | -2.708 |
| C      |     |   |   |        |        |        |
| HETATM | 676 | S | 0 | 7.697  | 13.718 | 0.484  |
| S      |     |   |   |        |        |        |

|        |     |   |   |        |        |        |
|--------|-----|---|---|--------|--------|--------|
| HETATM | 677 | S | 0 | 2.306  | 11.813 | 3.397  |
| S      |     |   |   |        |        |        |
| HETATM | 678 | N | 0 | 4.294  | 15.721 | 1.039  |
| N      |     |   |   |        |        |        |
| HETATM | 679 | N | 0 | 5.273  | 13.719 | -0.293 |
| N      |     |   |   |        |        |        |
| HETATM | 680 | N | 0 | 5.845  | 12.657 | -0.941 |
| N      |     |   |   |        |        |        |
| HETATM | 681 | N | 0 | 2.909  | 13.323 | 1.120  |
| N      |     |   |   |        |        |        |
| HETATM | 682 | C | 0 | 3.724  | 16.699 | 1.730  |
| C      |     |   |   |        |        |        |
| HETATM | 683 | H | 0 | 2.794  | 16.858 | 1.617  |
| H      |     |   |   |        |        |        |
| HETATM | 684 | C | 0 | 4.436  | 17.501 | 2.612  |
| C      |     |   |   |        |        |        |
| HETATM | 685 | H | 0 | 3.995  | 18.207 | 3.073  |
| H      |     |   |   |        |        |        |
| HETATM | 686 | C | 0 | 5.770  | 17.276 | 2.823  |
| C      |     |   |   |        |        |        |
| HETATM | 687 | H | 0 | 6.266  | 17.821 | 3.423  |
| H      |     |   |   |        |        |        |
| HETATM | 688 | C | 0 | 6.380  | 16.239 | 2.143  |
| C      |     |   |   |        |        |        |
| HETATM | 689 | H | 0 | 7.302  | 16.047 | 2.274  |
| H      |     |   |   |        |        |        |
| HETATM | 690 | C | 0 | 5.620  | 15.481 | 1.259  |
| C      |     |   |   |        |        |        |
| HETATM | 691 | C | 0 | 6.104  | 14.360 | 0.490  |
| C      |     |   |   |        |        |        |
| HETATM | 692 | C | 0 | 7.109  | 12.533 | -0.652 |
| C      |     |   |   |        |        |        |
| HETATM | 693 | C | 0 | 8.003  | 11.508 | -1.209 |
| C      |     |   |   |        |        |        |
| HETATM | 694 | C | 0 | 7.479  | 10.435 | -1.966 |
| C      |     |   |   |        |        |        |
| HETATM | 695 | H | 0 | 6.541  | 10.364 | -2.089 |
| H      |     |   |   |        |        |        |
| HETATM | 696 | C | 0 | 8.297  | 9.511  | -2.518 |
| C      |     |   |   |        |        |        |
| HETATM | 697 | H | 0 | 7.924  | 8.792  | -3.016 |
| H      |     |   |   |        |        |        |
| HETATM | 698 | C | 0 | 9.708  | 9.596  | -2.367 |
| C      |     |   |   |        |        |        |
| HETATM | 699 | C | 0 | 10.596 | 8.667  | -2.948 |
| C      |     |   |   |        |        |        |
| HETATM | 700 | H | 0 | 10.250 | 7.944  | -3.456 |
| H      |     |   |   |        |        |        |
| HETATM | 701 | C | 0 | 11.952 | 8.795  | -2.790 |
| C      |     |   |   |        |        |        |
| HETATM | 702 | H | 0 | 12.535 | 8.158  | -3.189 |
| H      |     |   |   |        |        |        |
| HETATM | 703 | C | 0 | 12.490 | 9.862  | -2.040 |
| C      |     |   |   |        |        |        |
| HETATM | 704 | H | 0 | 13.431 | 9.940  | -1.936 |
| H      |     |   |   |        |        |        |

|        |     |    |   |        |        |        |
|--------|-----|----|---|--------|--------|--------|
| HETATM | 705 | C  | 0 | 11.660 | 10.779 | -1.467 |
| C      |     |    |   |        |        |        |
| HETATM | 706 | H  | 0 | 12.029 | 11.494 | -0.964 |
| H      |     |    |   |        |        |        |
| HETATM | 707 | C  | 0 | 10.248 | 10.676 | -1.613 |
| C      |     |    |   |        |        |        |
| HETATM | 708 | C  | 0 | 9.369  | 11.613 | -1.044 |
| C      |     |    |   |        |        |        |
| HETATM | 709 | H  | 0 | 9.723  | 12.333 | -0.534 |
| H      |     |    |   |        |        |        |
| HETATM | 710 | C  | 0 | 2.668  | 12.696 | 2.049  |
| C      |     |    |   |        |        |        |
| HETATM | 711 | Fe | 0 | 7.273  | 2.761  | 0.142  |
| Fe     |     |    |   |        |        |        |
| HETATM | 712 | S  | 0 | 3.010  | 3.549  | -0.672 |
| S      |     |    |   |        |        |        |
| HETATM | 713 | S  | 0 | 8.399  | 5.455  | -3.583 |
| S      |     |    |   |        |        |        |
| HETATM | 714 | N  | 0 | 6.412  | 1.545  | -1.226 |
| N      |     |    |   |        |        |        |
| HETATM | 715 | N  | 0 | 5.433  | 3.548  | 0.106  |
| N      |     |    |   |        |        |        |
| HETATM | 716 | N  | 0 | 4.862  | 4.610  | 0.754  |
| N      |     |    |   |        |        |        |
| HETATM | 717 | N  | 0 | 7.798  | 3.944  | -1.307 |
| N      |     |    |   |        |        |        |
| HETATM | 718 | C  | 0 | 6.981  | 0.568  | -1.917 |
| C      |     |    |   |        |        |        |
| HETATM | 719 | H  | 0 | 7.912  | 0.409  | -1.805 |
| H      |     |    |   |        |        |        |
| HETATM | 720 | C  | 0 | 6.271  | -0.234 | -2.800 |
| C      |     |    |   |        |        |        |
| HETATM | 721 | H  | 0 | 6.710  | -0.940 | -3.259 |
| H      |     |    |   |        |        |        |
| HETATM | 722 | C  | 0 | 4.937  | -0.009 | -3.010 |
| C      |     |    |   |        |        |        |
| HETATM | 723 | H  | 0 | 4.440  | -0.553 | -3.610 |
| H      |     |    |   |        |        |        |
| HETATM | 724 | C  | 0 | 4.325  | 1.028  | -2.329 |
| C      |     |    |   |        |        |        |
| HETATM | 725 | H  | 0 | 3.405  | 1.220  | -2.462 |
| H      |     |    |   |        |        |        |
| HETATM | 726 | C  | 0 | 5.086  | 1.786  | -1.447 |
| C      |     |    |   |        |        |        |
| HETATM | 727 | C  | 0 | 4.602  | 2.908  | -0.677 |
| C      |     |    |   |        |        |        |
| HETATM | 728 | C  | 0 | 3.598  | 4.735  | 0.464  |
| C      |     |    |   |        |        |        |
| HETATM | 729 | C  | 0 | 2.702  | 5.759  | 1.022  |
| C      |     |    |   |        |        |        |
| HETATM | 730 | C  | 0 | 3.226  | 6.831  | 1.779  |
| C      |     |    |   |        |        |        |
| HETATM | 731 | H  | 0 | 4.165  | 6.904  | 1.902  |
| H      |     |    |   |        |        |        |
| HETATM | 732 | C  | 0 | 2.409  | 7.757  | 2.331  |
| C      |     |    |   |        |        |        |

|        |     |   |   |        |       |        |
|--------|-----|---|---|--------|-------|--------|
| HETATM | 733 | H | 0 | 2.783  | 8.476 | 2.828  |
| H      |     |   |   |        |       |        |
| HETATM | 734 | C | 0 | 0.998  | 7.671 | 2.179  |
| C      |     |   |   |        |       |        |
| HETATM | 735 | C | 0 | 0.110  | 8.599 | 2.761  |
| C      |     |   |   |        |       |        |
| HETATM | 736 | H | 0 | 0.456  | 9.323 | 3.269  |
| H      |     |   |   |        |       |        |
| HETATM | 737 | C | 0 | -1.247 | 8.472 | 2.602  |
| C      |     |   |   |        |       |        |
| HETATM | 738 | H | 0 | -1.829 | 9.109 | 3.001  |
| H      |     |   |   |        |       |        |
| HETATM | 739 | C | 0 | -1.784 | 7.406 | 1.854  |
| C      |     |   |   |        |       |        |
| HETATM | 740 | H | 0 | -2.726 | 7.327 | 1.748  |
| H      |     |   |   |        |       |        |
| HETATM | 741 | C | 0 | -0.954 | 6.488 | 1.280  |
| C      |     |   |   |        |       |        |
| HETATM | 742 | H | 0 | -1.323 | 5.773 | 0.777  |
| H      |     |   |   |        |       |        |
| HETATM | 743 | C | 0 | 0.458  | 6.591 | 1.427  |
| C      |     |   |   |        |       |        |
| HETATM | 744 | C | 0 | 1.337  | 5.654 | 0.856  |
| C      |     |   |   |        |       |        |
| HETATM | 745 | H | 0 | 0.983  | 4.934 | 0.346  |
| H      |     |   |   |        |       |        |
| HETATM | 746 | C | 0 | 8.039  | 4.571 | -2.235 |
| C      |     |   |   |        |       |        |
| HETATM | 747 | S | 0 | 11.537 | 1.973 | 0.956  |
| S      |     |   |   |        |       |        |
| HETATM | 748 | S | 0 | 6.146  | 0.067 | 3.868  |
| S      |     |   |   |        |       |        |
| HETATM | 749 | N | 0 | 8.134  | 3.976 | 1.511  |
| N      |     |   |   |        |       |        |
| HETATM | 750 | N | 0 | 9.112  | 1.974 | 0.179  |
| N      |     |   |   |        |       |        |
| HETATM | 751 | N | 0 | 9.684  | 0.911 | -0.469 |
| N      |     |   |   |        |       |        |
| HETATM | 752 | N | 0 | 6.749  | 1.578 | 1.592  |
| N      |     |   |   |        |       |        |
| HETATM | 753 | C | 0 | 7.564  | 4.953 | 2.201  |
| C      |     |   |   |        |       |        |
| HETATM | 754 | H | 0 | 6.634  | 5.112 | 2.089  |
| H      |     |   |   |        |       |        |
| HETATM | 755 | C | 0 | 8.276  | 5.756 | 3.084  |
| C      |     |   |   |        |       |        |
| HETATM | 756 | H | 0 | 7.835  | 6.461 | 3.544  |
| H      |     |   |   |        |       |        |
| HETATM | 757 | C | 0 | 9.610  | 5.530 | 3.295  |
| C      |     |   |   |        |       |        |
| HETATM | 758 | H | 0 | 10.106 | 6.075 | 3.895  |
| H      |     |   |   |        |       |        |
| HETATM | 759 | C | 0 | 10.220 | 4.494 | 2.614  |
| C      |     |   |   |        |       |        |
| HETATM | 760 | H | 0 | 11.142 | 4.302 | 2.747  |
| H      |     |   |   |        |       |        |

|        |     |    |   |        |         |        |
|--------|-----|----|---|--------|---------|--------|
| HETATM | 761 | C  | 0 | 9.459  | 3.736   | 1.730  |
| C      |     |    |   |        |         |        |
| HETATM | 762 | C  | 0 | 9.944  | 2.614   | 0.962  |
| C      |     |    |   |        |         |        |
| HETATM | 763 | C  | 0 | 10.948 | 0.788   | -0.180 |
| C      |     |    |   |        |         |        |
| HETATM | 764 | C  | 0 | 11.844 | -0.237  | -0.738 |
| C      |     |    |   |        |         |        |
| HETATM | 765 | C  | 0 | 11.319 | -1.310  | -1.494 |
| C      |     |    |   |        |         |        |
| HETATM | 766 | H  | 0 | 10.380 | -1.382  | -1.617 |
| H      |     |    |   |        |         |        |
| HETATM | 767 | C  | 0 | 12.137 | -2.235  | -2.047 |
| C      |     |    |   |        |         |        |
| HETATM | 768 | H  | 0 | 11.764 | -2.954  | -2.543 |
| H      |     |    |   |        |         |        |
| HETATM | 769 | C  | 0 | 13.547 | -2.149  | -1.895 |
| C      |     |    |   |        |         |        |
| HETATM | 770 | C  | 0 | 14.437 | -3.078  | -2.477 |
| C      |     |    |   |        |         |        |
| HETATM | 771 | H  | 0 | 14.090 | -3.802  | -2.984 |
| H      |     |    |   |        |         |        |
| HETATM | 772 | C  | 0 | 15.793 | -2.950  | -2.318 |
| C      |     |    |   |        |         |        |
| HETATM | 773 | H  | 0 | 16.375 | -3.587  | -2.716 |
| H      |     |    |   |        |         |        |
| HETATM | 774 | C  | 0 | 16.330 | -1.884  | -1.569 |
| C      |     |    |   |        |         |        |
| HETATM | 775 | H  | 0 | 17.270 | -1.805  | -1.463 |
| H      |     |    |   |        |         |        |
| HETATM | 776 | C  | 0 | 15.500 | -0.966  | -0.995 |
| C      |     |    |   |        |         |        |
| HETATM | 777 | H  | 0 | 15.869 | -0.250  | -0.493 |
| H      |     |    |   |        |         |        |
| HETATM | 778 | C  | 0 | 14.088 | -1.070  | -1.142 |
| C      |     |    |   |        |         |        |
| HETATM | 779 | C  | 0 | 13.210 | -0.132  | -0.571 |
| C      |     |    |   |        |         |        |
| HETATM | 780 | H  | 0 | 13.563 | 0.588   | -0.062 |
| H      |     |    |   |        |         |        |
| HETATM | 781 | C  | 0 | 6.508  | 0.950   | 2.520  |
| C      |     |    |   |        |         |        |
| HETATM | 782 | Fe | 0 | 11.113 | -8.985  | 0.614  |
| Fe     |     |    |   |        |         |        |
| HETATM | 783 | S  | 0 | 6.849  | -8.196  | -0.200 |
| S      |     |    |   |        |         |        |
| HETATM | 784 | S  | 0 | 12.240 | -6.290  | -3.112 |
| S      |     |    |   |        |         |        |
| HETATM | 785 | N  | 0 | 10.252 | -10.200 | -0.755 |
| N      |     |    |   |        |         |        |
| HETATM | 786 | N  | 0 | 9.274  | -8.198  | 0.577  |
| N      |     |    |   |        |         |        |
| HETATM | 787 | N  | 0 | 8.702  | -7.135  | 1.225  |
| N      |     |    |   |        |         |        |
| HETATM | 788 | N  | 0 | 11.637 | -7.802  | -0.835 |
| N      |     |    |   |        |         |        |

|        |     |   |   |        |         |        |
|--------|-----|---|---|--------|---------|--------|
| HETATM | 789 | C | 0 | 10.821 | -11.178 | -1.445 |
| C      |     |   |   |        |         |        |
| HETATM | 790 | H | 0 | 11.752 | -11.336 | -1.332 |
| H      |     |   |   |        |         |        |
| HETATM | 791 | C | 0 | 10.110 | -11.979 | -2.328 |
| C      |     |   |   |        |         |        |
| HETATM | 792 | H | 0 | 10.551 | -12.684 | -2.788 |
| H      |     |   |   |        |         |        |
| HETATM | 793 | C | 0 | 8.776  | -11.753 | -2.539 |
| C      |     |   |   |        |         |        |
| HETATM | 794 | H | 0 | 8.280  | -12.298 | -3.139 |
| H      |     |   |   |        |         |        |
| HETATM | 795 | C | 0 | 8.165  | -10.717 | -1.858 |
| C      |     |   |   |        |         |        |
| HETATM | 796 | H | 0 | 7.244  | -10.526 | -1.990 |
| H      |     |   |   |        |         |        |
| HETATM | 797 | C | 0 | 8.925  | -9.959  | -0.974 |
| C      |     |   |   |        |         |        |
| HETATM | 798 | C | 0 | 8.442  | -8.837  | -0.205 |
| C      |     |   |   |        |         |        |
| HETATM | 799 | C | 0 | 7.437  | -7.011  | 0.937  |
| C      |     |   |   |        |         |        |
| HETATM | 800 | C | 0 | 6.542  | -5.986  | 1.494  |
| C      |     |   |   |        |         |        |
| HETATM | 801 | C | 0 | 7.067  | -4.914  | 2.251  |
| C      |     |   |   |        |         |        |
| HETATM | 802 | H | 0 | 8.005  | -4.841  | 2.374  |
| H      |     |   |   |        |         |        |
| HETATM | 803 | C | 0 | 6.249  | -3.988  | 2.803  |
| C      |     |   |   |        |         |        |
| HETATM | 804 | H | 0 | 6.622  | -3.270  | 3.300  |
| H      |     |   |   |        |         |        |
| HETATM | 805 | C | 0 | 4.838  | -4.074  | 2.651  |
| C      |     |   |   |        |         |        |
| HETATM | 806 | C | 0 | 3.949  | -3.145  | 3.233  |
| C      |     |   |   |        |         |        |
| HETATM | 807 | H | 0 | 4.296  | -2.422  | 3.741  |
| H      |     |   |   |        |         |        |
| HETATM | 808 | C | 0 | 2.593  | -3.274  | 3.075  |
| C      |     |   |   |        |         |        |
| HETATM | 809 | H | 0 | 2.011  | -2.637  | 3.473  |
| H      |     |   |   |        |         |        |
| HETATM | 810 | C | 0 | 2.056  | -4.339  | 2.325  |
| C      |     |   |   |        |         |        |
| HETATM | 811 | H | 0 | 1.114  | -4.418  | 2.219  |
| H      |     |   |   |        |         |        |
| HETATM | 812 | C | 0 | 2.886  | -5.257  | 1.751  |
| C      |     |   |   |        |         |        |
| HETATM | 813 | H | 0 | 2.517  | -5.973  | 1.249  |
| H      |     |   |   |        |         |        |
| HETATM | 814 | C | 0 | 4.298  | -5.154  | 1.898  |
| C      |     |   |   |        |         |        |
| HETATM | 815 | C | 0 | 5.176  | -6.091  | 1.328  |
| C      |     |   |   |        |         |        |
| HETATM | 816 | H | 0 | 4.823  | -6.811  | 0.818  |
| H      |     |   |   |        |         |        |



|        |     |   |   |        |         |        |
|--------|-----|---|---|--------|---------|--------|
| HETATM | 817 | C | 0 | 11.878 | -7.174  | -1.764 |
| C      |     |   |   |        |         |        |
| HETATM | 818 | S | 0 | 15.376 | -9.773  | 1.428  |
| S      |     |   |   |        |         |        |
| HETATM | 819 | S | 0 | 9.985  | -11.678 | 4.340  |
| S      |     |   |   |        |         |        |
| HETATM | 820 | N | 0 | 11.974 | -7.769  | 1.983  |
| N      |     |   |   |        |         |        |
| HETATM | 821 | N | 0 | 12.952 | -9.771  | 0.650  |
| N      |     |   |   |        |         |        |
| HETATM | 822 | N | 0 | 13.524 | -10.833 | 0.002  |
| N      |     |   |   |        |         |        |
| HETATM | 823 | N | 0 | 10.588 | -10.168 | 2.063  |
| N      |     |   |   |        |         |        |
| HETATM | 824 | C | 0 | 11.404 | -6.791  | 2.674  |
| C      |     |   |   |        |         |        |
| HETATM | 825 | H | 0 | 10.474 | -6.633  | 2.561  |
| H      |     |   |   |        |         |        |
| HETATM | 826 | C | 0 | 12.115 | -5.990  | 3.556  |
| C      |     |   |   |        |         |        |
| HETATM | 827 | H | 0 | 11.675 | -5.285  | 4.015  |
| H      |     |   |   |        |         |        |
| HETATM | 828 | C | 0 | 13.449 | -6.215  | 3.767  |
| C      |     |   |   |        |         |        |
| HETATM | 829 | H | 0 | 13.945 | -5.670  | 4.367  |
| H      |     |   |   |        |         |        |
| HETATM | 830 | C | 0 | 14.060 | -7.251  | 3.085  |
| C      |     |   |   |        |         |        |
| HETATM | 831 | H | 0 | 14.981 | -7.443  | 3.218  |
| H      |     |   |   |        |         |        |
| HETATM | 832 | C | 0 | 13.300 | -8.009  | 2.203  |
| C      |     |   |   |        |         |        |
| HETATM | 833 | C | 0 | 13.784 | -9.131  | 1.433  |
| C      |     |   |   |        |         |        |
| HETATM | 834 | C | 0 | 14.788 | -10.958 | 0.292  |
| C      |     |   |   |        |         |        |
| HETATM | 835 | C | 0 | 15.683 | -11.982 | -0.265 |
| C      |     |   |   |        |         |        |
| HETATM | 836 | C | 0 | 15.159 | -13.056 | -1.023 |
| C      |     |   |   |        |         |        |
| HETATM | 837 | H | 0 | 14.220 | -13.127 | -1.146 |
| H      |     |   |   |        |         |        |
| HETATM | 838 | C | 0 | 15.976 | -13.981 | -1.576 |
| C      |     |   |   |        |         |        |
| HETATM | 839 | H | 0 | 15.603 | -14.699 | -2.072 |
| H      |     |   |   |        |         |        |
| HETATM | 840 | C | 0 | 17.387 | -13.894 | -1.423 |
| C      |     |   |   |        |         |        |
| HETATM | 841 | C | 0 | 18.276 | -14.823 | -2.004 |
| C      |     |   |   |        |         |        |
| HETATM | 842 | H | 0 | 17.930 | -15.547 | -2.513 |
| H      |     |   |   |        |         |        |
| HETATM | 843 | C | 0 | 19.633 | -14.696 | -1.846 |
| C      |     |   |   |        |         |        |
| HETATM | 844 | H | 0 | 20.215 | -15.332 | -2.245 |
| H      |     |   |   |        |         |        |

|        |     |    |   |        |         |        |
|--------|-----|----|---|--------|---------|--------|
| HETATM | 845 | C  | 0 | 20.170 | -13.630 | -1.098 |
| C      |     |    |   |        |         |        |
| HETATM | 846 | H  | 0 | 21.111 | -13.550 | -0.992 |
| H      |     |    |   |        |         |        |
| HETATM | 847 | C  | 0 | 19.340 | -12.712 | -0.523 |
| C      |     |    |   |        |         |        |
| HETATM | 848 | H  | 0 | 19.708 | -11.996 | -0.021 |
| H      |     |    |   |        |         |        |
| HETATM | 849 | C  | 0 | 17.927 | -12.814 | -0.671 |
| C      |     |    |   |        |         |        |
| HETATM | 850 | C  | 0 | 17.049 | -11.878 | -0.100 |
| C      |     |    |   |        |         |        |
| HETATM | 851 | H  | 0 | 17.402 | -11.157 | 0.410  |
| H      |     |    |   |        |         |        |
| HETATM | 852 | C  | 0 | 10.347 | -10.795 | 2.992  |
| C      |     |    |   |        |         |        |
| HETATM | 853 | Fe | 0 | 10.706 | 17.267  | -0.187 |
| Fe     |     |    |   |        |         |        |
| HETATM | 854 | S  | 0 | 6.442  | 18.055  | -1.001 |
| S      |     |    |   |        |         |        |
| HETATM | 855 | S  | 0 | 11.833 | 19.961  | -3.913 |
| S      |     |    |   |        |         |        |
| HETATM | 856 | N  | 0 | 9.845  | 16.052  | -1.555 |
| N      |     |    |   |        |         |        |
| HETATM | 857 | N  | 0 | 8.867  | 18.054  | -0.223 |
| N      |     |    |   |        |         |        |
| HETATM | 858 | N  | 0 | 8.294  | 19.116  | 0.425  |
| N      |     |    |   |        |         |        |
| HETATM | 859 | N  | 0 | 11.230 | 18.450  | -1.637 |
| N      |     |    |   |        |         |        |
| HETATM | 860 | C  | 0 | 10.415 | 15.074  | -2.247 |
| C      |     |    |   |        |         |        |
| HETATM | 861 | H  | 0 | 11.345 | 14.916  | -2.134 |
| H      |     |    |   |        |         |        |
| HETATM | 862 | C  | 0 | 9.703  | 14.272  | -3.129 |
| C      |     |    |   |        |         |        |
| HETATM | 863 | H  | 0 | 10.144 | 13.567  | -3.589 |
| H      |     |    |   |        |         |        |
| HETATM | 864 | C  | 0 | 8.369  | 14.498  | -3.340 |
| C      |     |    |   |        |         |        |
| HETATM | 865 | H  | 0 | 7.873  | 13.953  | -3.940 |
| H      |     |    |   |        |         |        |
| HETATM | 866 | C  | 0 | 7.759  | 15.534  | -2.659 |
| C      |     |    |   |        |         |        |
| HETATM | 867 | H  | 0 | 6.837  | 15.726  | -2.791 |
| H      |     |    |   |        |         |        |
| HETATM | 868 | C  | 0 | 8.520  | 16.292  | -1.776 |
| C      |     |    |   |        |         |        |
| HETATM | 869 | C  | 0 | 8.035  | 17.414  | -1.007 |
| C      |     |    |   |        |         |        |
| HETATM | 870 | C  | 0 | 7.030  | 19.240  | 0.135  |
| C      |     |    |   |        |         |        |
| HETATM | 871 | C  | 0 | 6.135  | 20.265  | 0.693  |
| C      |     |    |   |        |         |        |
| HETATM | 872 | C  | 0 | 6.660  | 21.338  | 1.449  |
| C      |     |    |   |        |         |        |

|        |     |   |   |        |        |        |
|--------|-----|---|---|--------|--------|--------|
| HETATM | 873 | H | 0 | 7.598  | 21.409 | 1.572  |
| H      |     |   |   |        |        |        |
| HETATM | 874 | C | 0 | 5.842  | 22.263 | 2.002  |
| C      |     |   |   |        |        |        |
| HETATM | 875 | H | 0 | 6.215  | 22.982 | 2.499  |
| H      |     |   |   |        |        |        |
| HETATM | 876 | C | 0 | 4.431  | 22.178 | 1.850  |
| C      |     |   |   |        |        |        |
| HETATM | 877 | C | 0 | 3.542  | 23.106 | 2.432  |
| C      |     |   |   |        |        |        |
| HETATM | 878 | H | 0 | 3.889  | 23.829 | 2.939  |
| H      |     |   |   |        |        |        |
| HETATM | 879 | C | 0 | 2.186  | 22.978 | 2.273  |
| C      |     |   |   |        |        |        |
| HETATM | 880 | H | 0 | 1.604  | 23.615 | 2.672  |
| H      |     |   |   |        |        |        |
| HETATM | 881 | C | 0 | 1.649  | 21.912 | 1.524  |
| C      |     |   |   |        |        |        |
| HETATM | 882 | H | 0 | 0.708  | 21.833 | 1.419  |
| H      |     |   |   |        |        |        |
| HETATM | 883 | C | 0 | 2.479  | 20.994 | 0.951  |
| C      |     |   |   |        |        |        |
| HETATM | 884 | H | 0 | 2.110  | 20.278 | 0.447  |
| H      |     |   |   |        |        |        |
| HETATM | 885 | C | 0 | 3.891  | 21.097 | 1.097  |
| C      |     |   |   |        |        |        |
| HETATM | 886 | C | 0 | 4.769  | 20.160 | 0.527  |
| C      |     |   |   |        |        |        |
| HETATM | 887 | H | 0 | 4.416  | 19.441 | 0.017  |
| H      |     |   |   |        |        |        |
| HETATM | 888 | C | 0 | 11.471 | 19.077 | -2.565 |
| C      |     |   |   |        |        |        |
| HETATM | 889 | S | 0 | 14.969 | 16.479 | 0.627  |
| S      |     |   |   |        |        |        |
| HETATM | 890 | S | 0 | 9.579  | 14.574 | 3.539  |
| S      |     |   |   |        |        |        |
| HETATM | 891 | N | 0 | 11.567 | 18.482 | 1.181  |
| N      |     |   |   |        |        |        |
| HETATM | 892 | N | 0 | 12.546 | 16.480 | -0.151 |
| N      |     |   |   |        |        |        |
| HETATM | 893 | N | 0 | 13.117 | 15.418 | -0.799 |
| N      |     |   |   |        |        |        |
| HETATM | 894 | N | 0 | 10.181 | 16.084 | 1.263  |
| N      |     |   |   |        |        |        |
| HETATM | 895 | C | 0 | 10.997 | 19.460 | 1.872  |
| C      |     |   |   |        |        |        |
| HETATM | 896 | H | 0 | 10.067 | 19.618 | 1.760  |
| H      |     |   |   |        |        |        |
| HETATM | 897 | C | 0 | 11.708 | 20.262 | 2.755  |
| C      |     |   |   |        |        |        |
| HETATM | 898 | H | 0 | 11.269 | 20.968 | 3.215  |
| H      |     |   |   |        |        |        |
| HETATM | 899 | C | 0 | 13.042 | 20.036 | 2.965  |
| C      |     |   |   |        |        |        |
| HETATM | 900 | H | 0 | 13.538 | 20.581 | 3.565  |
| H      |     |   |   |        |        |        |

|        |     |    |   |        |        |        |
|--------|-----|----|---|--------|--------|--------|
| HETATM | 901 | C  | 0 | 13.654 | 19.000 | 2.285  |
| C      |     |    |   |        |        |        |
| HETATM | 902 | H  | 0 | 14.574 | 18.808 | 2.417  |
| H      |     |    |   |        |        |        |
| HETATM | 903 | C  | 0 | 12.893 | 18.242 | 1.401  |
| C      |     |    |   |        |        |        |
| HETATM | 904 | C  | 0 | 13.377 | 17.120 | 0.632  |
| C      |     |    |   |        |        |        |
| HETATM | 905 | C  | 0 | 14.381 | 15.293 | -0.509 |
| C      |     |    |   |        |        |        |
| HETATM | 906 | C  | 0 | 15.276 | 14.269 | -1.067 |
| C      |     |    |   |        |        |        |
| HETATM | 907 | C  | 0 | 14.753 | 13.196 | -1.824 |
| C      |     |    |   |        |        |        |
| HETATM | 908 | H  | 0 | 13.813 | 13.125 | -1.947 |
| H      |     |    |   |        |        |        |
| HETATM | 909 | C  | 0 | 15.569 | 12.271 | -2.376 |
| C      |     |    |   |        |        |        |
| HETATM | 910 | H  | 0 | 15.196 | 11.552 | -2.873 |
| H      |     |    |   |        |        |        |
| HETATM | 911 | C  | 0 | 16.981 | 12.357 | -2.225 |
| C      |     |    |   |        |        |        |
| HETATM | 912 | C  | 0 | 17.869 | 11.428 | -2.806 |
| C      |     |    |   |        |        |        |
| HETATM | 913 | H  | 0 | 17.523 | 10.705 | -3.314 |
| H      |     |    |   |        |        |        |
| HETATM | 914 | C  | 0 | 19.226 | 11.556 | -2.648 |
| C      |     |    |   |        |        |        |
| HETATM | 915 | H  | 0 | 19.808 | 10.919 | -3.046 |
| H      |     |    |   |        |        |        |
| HETATM | 916 | C  | 0 | 19.763 | 12.622 | -1.898 |
| C      |     |    |   |        |        |        |
| HETATM | 917 | H  | 0 | 20.704 | 12.701 | -1.793 |
| H      |     |    |   |        |        |        |
| HETATM | 918 | C  | 0 | 18.932 | 13.540 | -1.325 |
| C      |     |    |   |        |        |        |
| HETATM | 919 | H  | 0 | 19.302 | 14.255 | -0.822 |
| H      |     |    |   |        |        |        |
| HETATM | 920 | C  | 0 | 17.521 | 13.437 | -1.471 |
| C      |     |    |   |        |        |        |
| HETATM | 921 | C  | 0 | 16.642 | 14.374 | -0.902 |
| C      |     |    |   |        |        |        |
| HETATM | 922 | H  | 0 | 16.996 | 15.093 | -0.392 |
| H      |     |    |   |        |        |        |
| HETATM | 923 | C  | 0 | 9.940  | 15.457 | 2.191  |
| C      |     |    |   |        |        |        |
| HETATM | 924 | Fe | 0 | 14.546 | 5.522  | 0.284  |
| Fe     |     |    |   |        |        |        |
| HETATM | 925 | S  | 0 | 10.283 | 6.310  | -0.530 |
| S      |     |    |   |        |        |        |
| HETATM | 926 | S  | 0 | 15.672 | 8.216  | -3.441 |
| S      |     |    |   |        |        |        |
| HETATM | 927 | N  | 0 | 13.685 | 4.306  | -1.084 |
| N      |     |    |   |        |        |        |
| HETATM | 928 | N  | 0 | 12.706 | 6.309  | 0.248  |
| N      |     |    |   |        |        |        |

|        |     |   |   |        |        |        |
|--------|-----|---|---|--------|--------|--------|
| HETATM | 929 | N | 0 | 12.134 | 7.371  | 0.896  |
| N      |     |   |   |        |        |        |
| HETATM | 930 | N | 0 | 15.070 | 6.705  | -1.165 |
| N      |     |   |   |        |        |        |
| HETATM | 931 | C | 0 | 14.255 | 3.329  | -1.775 |
| C      |     |   |   |        |        |        |
| HETATM | 932 | H | 0 | 15.185 | 3.170  | -1.663 |
| H      |     |   |   |        |        |        |
| HETATM | 933 | C | 0 | 13.543 | 2.526  | -2.658 |
| C      |     |   |   |        |        |        |
| HETATM | 934 | H | 0 | 13.983 | 1.821  | -3.117 |
| H      |     |   |   |        |        |        |
| HETATM | 935 | C | 0 | 12.209 | 2.752  | -2.868 |
| C      |     |   |   |        |        |        |
| HETATM | 936 | H | 0 | 11.713 | 2.208  | -3.468 |
| H      |     |   |   |        |        |        |
| HETATM | 937 | C | 0 | 11.598 | 3.789  | -2.187 |
| C      |     |   |   |        |        |        |
| HETATM | 938 | H | 0 | 10.677 | 3.980  | -2.320 |
| H      |     |   |   |        |        |        |
| HETATM | 939 | C | 0 | 12.359 | 4.547  | -1.304 |
| C      |     |   |   |        |        |        |
| HETATM | 940 | C | 0 | 11.874 | 5.669  | -0.535 |
| C      |     |   |   |        |        |        |
| HETATM | 941 | C | 0 | 10.870 | 7.495  | 0.606  |
| C      |     |   |   |        |        |        |
| HETATM | 942 | C | 0 | 9.976  | 8.520  | 1.164  |
| C      |     |   |   |        |        |        |
| HETATM | 943 | C | 0 | 10.499 | 9.592  | 1.922  |
| C      |     |   |   |        |        |        |
| HETATM | 944 | H | 0 | 11.438 | 9.665  | 2.044  |
| H      |     |   |   |        |        |        |
| HETATM | 945 | C | 0 | 9.682  | 10.518 | 2.473  |
| C      |     |   |   |        |        |        |
| HETATM | 946 | H | 0 | 10.055 | 11.236 | 2.970  |
| H      |     |   |   |        |        |        |
| HETATM | 947 | C | 0 | 8.271  | 10.432 | 2.322  |
| C      |     |   |   |        |        |        |
| HETATM | 948 | C | 0 | 7.383  | 11.360 | 2.903  |
| C      |     |   |   |        |        |        |
| HETATM | 949 | H | 0 | 7.729  | 12.084 | 3.412  |
| H      |     |   |   |        |        |        |
| HETATM | 950 | C | 0 | 6.027  | 11.233 | 2.745  |
| C      |     |   |   |        |        |        |
| HETATM | 951 | H | 0 | 5.444  | 11.870 | 3.143  |
| H      |     |   |   |        |        |        |
| HETATM | 952 | C | 0 | 5.488  | 10.167 | 1.996  |
| C      |     |   |   |        |        |        |
| HETATM | 953 | H | 0 | 4.548  | 10.088 | 1.890  |
| H      |     |   |   |        |        |        |
| HETATM | 954 | C | 0 | 6.319  | 9.249  | 1.422  |
| C      |     |   |   |        |        |        |
| HETATM | 955 | H | 0 | 5.950  | 8.534  | 0.920  |
| H      |     |   |   |        |        |        |
| HETATM | 956 | C | 0 | 7.731  | 9.352  | 1.569  |
| C      |     |   |   |        |        |        |

|        |     |   |   |        |        |        |
|--------|-----|---|---|--------|--------|--------|
| HETATM | 957 | C | 0 | 8.610  | 8.415  | 0.999  |
| C      |     |   |   |        |        |        |
| HETATM | 958 | H | 0 | 8.256  | 7.695  | 0.489  |
| H      |     |   |   |        |        |        |
| HETATM | 959 | C | 0 | 15.311 | 7.332  | -2.093 |
| C      |     |   |   |        |        |        |
| HETATM | 960 | S | 0 | 18.809 | 4.733  | 1.098  |
| S      |     |   |   |        |        |        |
| HETATM | 961 | S | 0 | 13.419 | 2.828  | 4.010  |
| S      |     |   |   |        |        |        |
| HETATM | 962 | N | 0 | 15.407 | 6.737  | 1.653  |
| N      |     |   |   |        |        |        |
| HETATM | 963 | N | 0 | 16.386 | 4.735  | 0.321  |
| N      |     |   |   |        |        |        |
| HETATM | 964 | N | 0 | 16.958 | 3.672  | -0.327 |
| N      |     |   |   |        |        |        |
| HETATM | 965 | N | 0 | 14.022 | 4.339  | 1.734  |
| N      |     |   |   |        |        |        |
| HETATM | 966 | C | 0 | 14.837 | 7.714  | 2.344  |
| C      |     |   |   |        |        |        |
| HETATM | 967 | H | 0 | 13.907 | 7.873  | 2.231  |
| H      |     |   |   |        |        |        |
| HETATM | 968 | C | 0 | 15.549 | 8.517  | 3.226  |
| C      |     |   |   |        |        |        |
| HETATM | 969 | H | 0 | 15.108 | 9.222  | 3.686  |
| H      |     |   |   |        |        |        |
| HETATM | 970 | C | 0 | 16.883 | 8.291  | 3.438  |
| C      |     |   |   |        |        |        |
| HETATM | 971 | H | 0 | 17.378 | 8.836  | 4.038  |
| H      |     |   |   |        |        |        |
| HETATM | 972 | C | 0 | 17.493 | 7.255  | 2.756  |
| C      |     |   |   |        |        |        |
| HETATM | 973 | H | 0 | 18.414 | 7.063  | 2.889  |
| H      |     |   |   |        |        |        |
| HETATM | 974 | C | 0 | 16.733 | 6.497  | 1.873  |
| C      |     |   |   |        |        |        |
| HETATM | 975 | C | 0 | 17.217 | 5.375  | 1.104  |
| C      |     |   |   |        |        |        |
| HETATM | 976 | C | 0 | 18.221 | 3.549  | -0.038 |
| C      |     |   |   |        |        |        |
| HETATM | 977 | C | 0 | 19.116 | 2.524  | -0.596 |
| C      |     |   |   |        |        |        |
| HETATM | 978 | C | 0 | 18.592 | 1.451  | -1.352 |
| C      |     |   |   |        |        |        |
| HETATM | 979 | H | 0 | 17.653 | 1.379  | -1.475 |
| H      |     |   |   |        |        |        |
| HETATM | 980 | C | 0 | 19.410 | 0.526  | -1.905 |
| C      |     |   |   |        |        |        |
| HETATM | 981 | H | 0 | 19.036 | -0.193 | -2.401 |
| H      |     |   |   |        |        |        |
| HETATM | 982 | C | 0 | 20.821 | 0.612  | -1.752 |
| C      |     |   |   |        |        |        |
| HETATM | 983 | C | 0 | 21.709 | -0.317 | -2.335 |
| C      |     |   |   |        |        |        |
| HETATM | 984 | H | 0 | 21.363 | -1.041 | -2.842 |
| H      |     |   |   |        |        |        |

|        |      |    |   |        |        |        |
|--------|------|----|---|--------|--------|--------|
| HETATM | 985  | C  | 0 | 23.065 | -0.190 | -2.176 |
| C      |      |    |   |        |        |        |
| HETATM | 986  | H  | 0 | 23.648 | -0.826 | -2.574 |
| H      |      |    |   |        |        |        |
| HETATM | 987  | C  | 0 | 23.603 | 0.877  | -1.427 |
| C      |      |    |   |        |        |        |
| HETATM | 988  | H  | 0 | 24.544 | 0.956  | -1.321 |
| H      |      |    |   |        |        |        |
| HETATM | 989  | C  | 0 | 22.772 | 1.794  | -0.853 |
| C      |      |    |   |        |        |        |
| HETATM | 990  | H  | 0 | 23.141 | 2.510  | -0.350 |
| H      |      |    |   |        |        |        |
| HETATM | 991  | C  | 0 | 21.361 | 1.691  | -1.000 |
| C      |      |    |   |        |        |        |
| HETATM | 992  | C  | 0 | 20.482 | 2.629  | -0.429 |
| C      |      |    |   |        |        |        |
| HETATM | 993  | H  | 0 | 20.835 | 3.349  | 0.081  |
| H      |      |    |   |        |        |        |
| HETATM | 994  | C  | 0 | 13.780 | 3.711  | 2.662  |
| C      |      |    |   |        |        |        |
| HETATM | 995  | Fe | 0 | 18.386 | -6.224 | 0.757  |
| Fe     |      |    |   |        |        |        |
| HETATM | 996  | S  | 0 | 14.122 | -5.435 | -0.057 |
| S      |      |    |   |        |        |        |
| HETATM | 997  | S  | 0 | 19.512 | -3.530 | -2.970 |
| S      |      |    |   |        |        |        |
| HETATM | 998  | N  | 0 | 17.525 | -7.439 | -0.612 |
| N      |      |    |   |        |        |        |
| HETATM | 999  | N  | 0 | 16.546 | -5.437 | 0.719  |
| N      |      |    |   |        |        |        |
| HETATM | 1000 | N  | 0 | 15.974 | -4.375 | 1.368  |
| N      |      |    |   |        |        |        |
| HETATM | 1001 | N  | 0 | 18.910 | -5.041 | -0.693 |
| N      |      |    |   |        |        |        |
| HETATM | 1002 | C  | 0 | 18.094 | -8.417 | -1.303 |
| C      |      |    |   |        |        |        |
| HETATM | 1003 | H  | 0 | 19.024 | -8.576 | -1.190 |
| H      |      |    |   |        |        |        |
| HETATM | 1004 | C  | 0 | 17.382 | -9.218 | -2.185 |
| C      |      |    |   |        |        |        |
| HETATM | 1005 | H  | 0 | 17.823 | -9.923 | -2.646 |
| H      |      |    |   |        |        |        |
| HETATM | 1006 | C  | 0 | 16.048 | -8.993 | -2.397 |
| C      |      |    |   |        |        |        |
| HETATM | 1007 | H  | 0 | 15.553 | -9.537 | -2.997 |
| H      |      |    |   |        |        |        |
| HETATM | 1008 | C  | 0 | 15.438 | -7.956 | -1.715 |
| C      |      |    |   |        |        |        |
| HETATM | 1009 | H  | 0 | 14.518 | -7.765 | -1.848 |
| H      |      |    |   |        |        |        |
| HETATM | 1010 | C  | 0 | 16.199 | -7.198 | -0.832 |
| C      |      |    |   |        |        |        |
| HETATM | 1011 | C  | 0 | 15.714 | -6.077 | -0.063 |
| C      |      |    |   |        |        |        |
| HETATM | 1012 | C  | 0 | 14.710 | -4.250 | 1.079  |
| C      |      |    |   |        |        |        |

|             |   |   |        |        |        |
|-------------|---|---|--------|--------|--------|
| HETATM 1013 | C | 0 | 13.815 | -3.225 | 1.636  |
| C           |   |   |        |        |        |
| HETATM 1014 | C | 0 | 14.339 | -2.153 | 2.393  |
| C           |   |   |        |        |        |
| HETATM 1015 | H | 0 | 15.278 | -2.080 | 2.516  |
| H           |   |   |        |        |        |
| HETATM 1016 | C | 0 | 13.521 | -1.227 | 2.945  |
| C           |   |   |        |        |        |
| HETATM 1017 | H | 0 | 13.896 | -0.509 | 3.442  |
| H           |   |   |        |        |        |
| HETATM 1018 | C | 0 | 12.111 | -1.314 | 2.793  |
| C           |   |   |        |        |        |
| HETATM 1019 | C | 0 | 11.222 | -0.384 | 3.375  |
| C           |   |   |        |        |        |
| HETATM 1020 | H | 0 | 11.569 | 0.339  | 3.883  |
| H           |   |   |        |        |        |
| HETATM 1021 | C | 0 | 9.866  | -0.513 | 3.217  |
| C           |   |   |        |        |        |
| HETATM 1022 | H | 0 | 9.284  | 0.124  | 3.615  |
| H           |   |   |        |        |        |
| HETATM 1023 | C | 0 | 9.328  | -1.578 | 2.467  |
| C           |   |   |        |        |        |
| HETATM 1024 | H | 0 | 8.388  | -1.657 | 2.362  |
| H           |   |   |        |        |        |
| HETATM 1025 | C | 0 | 10.159 | -2.496 | 1.893  |
| C           |   |   |        |        |        |
| HETATM 1026 | H | 0 | 9.790  | -3.212 | 1.391  |
| H           |   |   |        |        |        |
| HETATM 1027 | C | 0 | 11.570 | -2.394 | 2.040  |
| C           |   |   |        |        |        |
| HETATM 1028 | C | 0 | 12.449 | -3.330 | 1.470  |
| C           |   |   |        |        |        |
| HETATM 1029 | H | 0 | 12.096 | -4.050 | 0.960  |
| H           |   |   |        |        |        |
| HETATM 1030 | C | 0 | 19.152 | -4.413 | -1.622 |
| C           |   |   |        |        |        |
| HETATM 1031 | S | 0 | 22.650 | -7.012 | 1.570  |
| S           |   |   |        |        |        |
| HETATM 1032 | S | 0 | 17.259 | -8.917 | 4.482  |
| S           |   |   |        |        |        |
| HETATM 1033 | N | 0 | 19.247 | -5.009 | 2.125  |
| N           |   |   |        |        |        |
| HETATM 1034 | N | 0 | 20.225 | -7.010 | 0.793  |
| N           |   |   |        |        |        |
| HETATM 1035 | N | 0 | 20.797 | -8.072 | 0.144  |
| N           |   |   |        |        |        |
| HETATM 1036 | N | 0 | 17.862 | -7.407 | 2.205  |
| N           |   |   |        |        |        |
| HETATM 1037 | C | 0 | 18.677 | -4.030 | 2.816  |
| C           |   |   |        |        |        |
| HETATM 1038 | H | 0 | 17.747 | -3.872 | 2.703  |
| H           |   |   |        |        |        |
| HETATM 1039 | C | 0 | 19.388 | -3.229 | 3.698  |
| C           |   |   |        |        |        |
| HETATM 1040 | H | 0 | 18.948 | -2.524 | 4.158  |
| H           |   |   |        |        |        |



|         |      |    |    |        |         |        |
|---------|------|----|----|--------|---------|--------|
| HETATM  | 1041 | C  | 0  | 20.723 | -3.454  | 3.909  |
| C       |      |    |    |        |         |        |
| HETATM  | 1042 | H  | 0  | 21.219 | -2.909  | 4.509  |
| H       |      |    |    |        |         |        |
| HETATM  | 1043 | C  | 0  | 21.333 | -4.491  | 3.227  |
| C       |      |    |    |        |         |        |
| HETATM  | 1044 | H  | 0  | 22.254 | -4.682  | 3.360  |
| H       |      |    |    |        |         |        |
| HETATM  | 1045 | C  | 0  | 20.572 | -5.249  | 2.345  |
| C       |      |    |    |        |         |        |
| HETATM  | 1046 | C  | 0  | 21.057 | -6.370  | 1.575  |
| C       |      |    |    |        |         |        |
| HETATM  | 1047 | C  | 0  | 22.061 | -8.197  | 0.434  |
| C       |      |    |    |        |         |        |
| HETATM  | 1048 | C  | 0  | 22.956 | -9.221  | -0.123 |
| C       |      |    |    |        |         |        |
| HETATM  | 1049 | C  | 0  | 22.432 | -10.295 | -0.881 |
| C       |      |    |    |        |         |        |
| HETATM  | 1050 | H  | 0  | 21.493 | -10.366 | -1.004 |
| H       |      |    |    |        |         |        |
| HETATM  | 1051 | C  | 0  | 23.250 | -11.220 | -1.433 |
| C       |      |    |    |        |         |        |
| HETATM  | 1052 | H  | 0  | 22.876 | -11.938 | -1.930 |
| H       |      |    |    |        |         |        |
| HETATM  | 1053 | C  | 0  | 24.660 | -11.133 | -1.281 |
| C       |      |    |    |        |         |        |
| HETATM  | 1054 | C  | 0  | 25.549 | -12.063 | -1.862 |
| C       |      |    |    |        |         |        |
| HETATM  | 1055 | H  | 0  | 25.202 | -12.787 | -2.371 |
| H       |      |    |    |        |         |        |
| HETATM  | 1056 | C  | 0  | 26.905 | -11.935 | -1.704 |
| C       |      |    |    |        |         |        |
| HETATM  | 1057 | H  | 0  | 27.487 | -12.572 | -2.102 |
| H       |      |    |    |        |         |        |
| HETATM  | 1058 | C  | 0  | 27.443 | -10.868 | -0.955 |
| C       |      |    |    |        |         |        |
| HETATM  | 1059 | H  | 0  | 28.383 | -10.790 | -0.849 |
| H       |      |    |    |        |         |        |
| HETATM  | 1060 | C  | 0  | 26.613 | -9.951  | -0.381 |
| C       |      |    |    |        |         |        |
| HETATM  | 1061 | H  | 0  | 26.982 | -9.235  | 0.121  |
| H       |      |    |    |        |         |        |
| HETATM  | 1062 | C  | 0  | 25.201 | -10.053 | -0.528 |
| C       |      |    |    |        |         |        |
| HETATM  | 1063 | C  | 0  | 24.322 | -9.117  | 0.042  |
| C       |      |    |    |        |         |        |
| HETATM  | 1064 | H  | 0  | 24.676 | -8.396  | 0.552  |
| H       |      |    |    |        |         |        |
| HETATM  | 1065 | C  | 0  | 17.621 | -8.034  | 3.134  |
| C       |      |    |    |        |         |        |
| END     |      |    |    |        |         |        |
| CONNECT | 1    | 7  | 42 |        |         |        |
| CONNECT | 2    | 17 | 18 |        |         |        |
| CONNECT | 3    | 36 |    |        |         |        |
| CONNECT | 4    | 8  | 16 |        |         |        |
| CONNECT | 5    | 6  | 17 |        |         |        |
| CONNECT | 6    | 5  | 18 |        |         |        |

|        |    |    |    |    |
|--------|----|----|----|----|
| CONECT | 7  | 1  | 36 |    |
| CONECT | 8  | 4  | 9  | 10 |
| CONECT | 9  | 8  |    |    |
| CONECT | 10 | 8  | 11 | 12 |
| CONECT | 11 | 10 |    |    |
| CONECT | 12 | 10 | 13 | 14 |
| CONECT | 13 | 12 |    |    |
| CONECT | 14 | 12 | 15 | 16 |
| CONECT | 15 | 14 |    |    |
| CONECT | 16 | 14 | 4  | 17 |
| CONECT | 17 | 2  | 16 | 5  |
| CONECT | 18 | 2  | 6  | 19 |
| CONECT | 19 | 18 | 20 | 34 |
| CONECT | 20 | 19 | 21 | 22 |
| CONECT | 21 | 20 |    |    |
| CONECT | 22 | 20 | 23 | 24 |
| CONECT | 23 | 22 |    |    |
| CONECT | 24 | 22 | 25 | 33 |
| CONECT | 25 | 24 | 26 | 27 |
| CONECT | 26 | 25 |    |    |
| CONECT | 27 | 25 | 28 | 29 |
| CONECT | 28 | 27 |    |    |
| CONECT | 29 | 27 | 30 | 31 |
| CONECT | 30 | 29 |    |    |
| CONECT | 31 | 29 | 32 | 33 |
| CONECT | 32 | 31 |    |    |
| CONECT | 33 | 31 | 24 | 34 |
| CONECT | 34 | 19 | 33 | 35 |
| CONECT | 35 | 34 |    |    |
| CONECT | 36 | 3  | 7  |    |
| CONECT | 37 | 52 | 53 |    |
| CONECT | 38 | 71 |    |    |
| CONECT | 39 | 43 | 51 |    |
| CONECT | 40 | 41 | 52 |    |
| CONECT | 41 | 40 | 53 |    |
| CONECT | 42 | 1  | 71 |    |
| CONECT | 43 | 39 | 44 | 45 |
| CONECT | 44 | 43 |    |    |
| CONECT | 45 | 43 | 46 | 47 |
| CONECT | 46 | 45 |    |    |
| CONECT | 47 | 45 | 48 | 49 |
| CONECT | 48 | 47 |    |    |
| CONECT | 49 | 47 | 50 | 51 |
| CONECT | 50 | 49 |    |    |
| CONECT | 51 | 39 | 49 | 52 |
| CONECT | 52 | 37 | 40 | 51 |
| CONECT | 53 | 37 | 41 | 54 |
| CONECT | 54 | 53 | 55 | 69 |
| CONECT | 55 | 54 | 56 | 57 |
| CONECT | 56 | 55 |    |    |
| CONECT | 57 | 55 | 58 | 59 |
| CONECT | 58 | 57 |    |    |
| CONECT | 59 | 57 | 60 | 68 |
| CONECT | 60 | 59 | 61 | 62 |
| CONECT | 61 | 60 |    |    |
| CONECT | 62 | 60 | 63 | 64 |
| CONECT | 63 | 62 |    |    |

|         |     |     |     |     |
|---------|-----|-----|-----|-----|
| CONNECT | 64  | 62  | 65  | 66  |
| CONNECT | 65  | 64  |     |     |
| CONNECT | 66  | 64  | 67  | 68  |
| CONNECT | 67  | 66  |     |     |
| CONNECT | 68  | 59  | 66  | 69  |
| CONNECT | 69  | 54  | 68  | 70  |
| CONNECT | 70  | 69  |     |     |
| CONNECT | 71  | 38  | 42  |     |
| CONNECT | 72  | 78  | 113 |     |
| CONNECT | 73  | 88  | 89  |     |
| CONNECT | 74  | 107 |     |     |
| CONNECT | 75  | 79  | 87  |     |
| CONNECT | 76  | 77  | 88  |     |
| CONNECT | 77  | 76  | 89  |     |
| CONNECT | 78  | 72  | 107 |     |
| CONNECT | 79  | 75  | 80  | 81  |
| CONNECT | 80  | 79  |     |     |
| CONNECT | 81  | 79  | 82  | 83  |
| CONNECT | 82  | 81  |     |     |
| CONNECT | 83  | 81  | 84  | 85  |
| CONNECT | 84  | 83  |     |     |
| CONNECT | 85  | 83  | 86  | 87  |
| CONNECT | 86  | 85  |     |     |
| CONNECT | 87  | 75  | 85  | 88  |
| CONNECT | 88  | 87  | 73  | 76  |
| CONNECT | 89  | 73  | 77  | 90  |
| CONNECT | 90  | 89  | 91  | 105 |
| CONNECT | 91  | 90  | 92  | 93  |
| CONNECT | 92  | 91  |     |     |
| CONNECT | 93  | 91  | 94  | 95  |
| CONNECT | 94  | 93  |     |     |
| CONNECT | 95  | 93  | 96  | 104 |
| CONNECT | 96  | 95  | 97  | 98  |
| CONNECT | 97  | 96  |     |     |
| CONNECT | 98  | 96  | 99  | 100 |
| CONNECT | 99  | 98  |     |     |
| CONNECT | 100 | 98  | 101 | 102 |
| CONNECT | 101 | 100 |     |     |
| CONNECT | 102 | 100 | 103 | 104 |
| CONNECT | 103 | 102 |     |     |
| CONNECT | 104 | 95  | 102 | 105 |
| CONNECT | 105 | 104 | 90  | 106 |
| CONNECT | 106 | 105 |     |     |
| CONNECT | 107 | 78  | 74  |     |
| CONNECT | 108 | 123 | 124 |     |
| CONNECT | 109 | 142 |     |     |
| CONNECT | 110 | 114 | 122 |     |
| CONNECT | 111 | 112 | 123 |     |
| CONNECT | 112 | 111 | 124 |     |
| CONNECT | 113 | 72  | 142 |     |
| CONNECT | 114 | 110 | 115 | 116 |
| CONNECT | 115 | 114 |     |     |
| CONNECT | 116 | 114 | 117 | 118 |
| CONNECT | 117 | 116 |     |     |
| CONNECT | 118 | 116 | 119 | 120 |
| CONNECT | 119 | 118 |     |     |
| CONNECT | 120 | 118 | 121 | 122 |

|         |     |     |     |     |
|---------|-----|-----|-----|-----|
| CONNECT | 121 | 120 |     |     |
| CONNECT | 122 | 110 | 120 | 123 |
| CONNECT | 123 | 108 | 111 | 122 |
| CONNECT | 124 | 108 | 112 | 125 |
| CONNECT | 125 | 124 | 126 | 140 |
| CONNECT | 126 | 125 | 127 | 128 |
| CONNECT | 127 | 126 |     |     |
| CONNECT | 128 | 126 | 129 | 130 |
| CONNECT | 129 | 128 |     |     |
| CONNECT | 130 | 128 | 131 | 139 |
| CONNECT | 131 | 130 | 132 | 133 |
| CONNECT | 132 | 131 |     |     |
| CONNECT | 133 | 131 | 134 | 135 |
| CONNECT | 134 | 133 |     |     |
| CONNECT | 135 | 133 | 136 | 137 |
| CONNECT | 136 | 135 |     |     |
| CONNECT | 137 | 135 | 138 | 139 |
| CONNECT | 138 | 137 |     |     |
| CONNECT | 139 | 130 | 137 | 140 |
| CONNECT | 140 | 139 | 125 | 141 |
| CONNECT | 141 | 140 |     |     |
| CONNECT | 142 | 109 | 113 |     |
| CONNECT | 143 | 149 | 184 |     |
| CONNECT | 144 | 159 | 160 |     |
| CONNECT | 145 | 178 |     |     |
| CONNECT | 146 | 150 | 158 |     |
| CONNECT | 147 | 148 | 159 |     |
| CONNECT | 148 | 147 | 160 |     |
| CONNECT | 149 | 143 | 178 |     |
| CONNECT | 150 | 146 | 151 | 152 |
| CONNECT | 151 | 150 |     |     |
| CONNECT | 152 | 150 | 153 | 154 |
| CONNECT | 153 | 152 |     |     |
| CONNECT | 154 | 152 | 155 | 156 |
| CONNECT | 155 | 154 |     |     |
| CONNECT | 156 | 154 | 157 | 158 |
| CONNECT | 157 | 156 |     |     |
| CONNECT | 158 | 156 | 146 | 159 |
| CONNECT | 159 | 144 | 147 | 158 |
| CONNECT | 160 | 144 | 148 | 161 |
| CONNECT | 161 | 160 | 162 | 176 |
| CONNECT | 162 | 161 | 163 | 164 |
| CONNECT | 163 | 162 |     |     |
| CONNECT | 164 | 162 | 165 | 166 |
| CONNECT | 165 | 164 |     |     |
| CONNECT | 166 | 164 | 167 | 175 |
| CONNECT | 167 | 166 | 168 | 169 |
| CONNECT | 168 | 167 |     |     |
| CONNECT | 169 | 167 | 170 | 171 |
| CONNECT | 170 | 169 |     |     |
| CONNECT | 171 | 169 | 172 | 173 |
| CONNECT | 172 | 171 |     |     |
| CONNECT | 173 | 171 | 174 | 175 |
| CONNECT | 174 | 173 |     |     |
| CONNECT | 175 | 166 | 173 | 176 |
| CONNECT | 176 | 161 | 175 | 177 |
| CONNECT | 177 | 176 |     |     |

|        |     |     |     |     |
|--------|-----|-----|-----|-----|
| CONECT | 178 | 149 | 145 |     |
| CONECT | 179 | 194 | 195 |     |
| CONECT | 180 | 213 |     |     |
| CONECT | 181 | 185 | 193 |     |
| CONECT | 182 | 183 | 194 |     |
| CONECT | 183 | 182 | 195 |     |
| CONECT | 184 | 143 | 213 |     |
| CONECT | 185 | 181 | 186 | 187 |
| CONECT | 186 | 185 |     |     |
| CONECT | 187 | 185 | 188 | 189 |
| CONECT | 188 | 187 |     |     |
| CONECT | 189 | 187 | 190 | 191 |
| CONECT | 190 | 189 |     |     |
| CONECT | 191 | 189 | 192 | 193 |
| CONECT | 192 | 191 |     |     |
| CONECT | 193 | 181 | 191 | 194 |
| CONECT | 194 | 182 | 193 | 179 |
| CONECT | 195 | 183 | 179 | 196 |
| CONECT | 196 | 195 | 197 | 211 |
| CONECT | 197 | 196 | 198 | 199 |
| CONECT | 198 | 197 |     |     |
| CONECT | 199 | 197 | 200 | 201 |
| CONECT | 200 | 199 |     |     |
| CONECT | 201 | 199 | 202 | 210 |
| CONECT | 202 | 201 | 203 | 204 |
| CONECT | 203 | 202 |     |     |
| CONECT | 204 | 202 | 205 | 206 |
| CONECT | 205 | 204 |     |     |
| CONECT | 206 | 204 | 207 | 208 |
| CONECT | 207 | 206 |     |     |
| CONECT | 208 | 206 | 209 | 210 |
| CONECT | 209 | 208 |     |     |
| CONECT | 210 | 201 | 208 | 211 |
| CONECT | 211 | 210 | 196 | 212 |
| CONECT | 212 | 211 |     |     |
| CONECT | 213 | 180 | 184 |     |
| CONECT | 214 | 220 | 255 |     |
| CONECT | 215 | 230 | 231 |     |
| CONECT | 216 | 249 |     |     |
| CONECT | 217 | 221 | 229 |     |
| CONECT | 218 | 219 | 230 |     |
| CONECT | 219 | 218 | 231 |     |
| CONECT | 220 | 214 | 249 |     |
| CONECT | 221 | 217 | 222 | 223 |
| CONECT | 222 | 221 |     |     |
| CONECT | 223 | 221 | 224 | 225 |
| CONECT | 224 | 223 |     |     |
| CONECT | 225 | 223 | 226 | 227 |
| CONECT | 226 | 225 |     |     |
| CONECT | 227 | 225 | 228 | 229 |
| CONECT | 228 | 227 |     |     |
| CONECT | 229 | 227 | 217 | 230 |
| CONECT | 230 | 215 | 229 | 218 |
| CONECT | 231 | 215 | 219 | 232 |
| CONECT | 232 | 231 | 233 | 247 |
| CONECT | 233 | 232 | 234 | 235 |
| CONECT | 234 | 233 |     |     |

|         |     |     |     |     |
|---------|-----|-----|-----|-----|
| CONNECT | 235 | 233 | 236 | 237 |
| CONNECT | 236 | 235 |     |     |
| CONNECT | 237 | 235 | 238 | 246 |
| CONNECT | 238 | 237 | 239 | 240 |
| CONNECT | 239 | 238 |     |     |
| CONNECT | 240 | 238 | 241 | 242 |
| CONNECT | 241 | 240 |     |     |
| CONNECT | 242 | 240 | 243 | 244 |
| CONNECT | 243 | 242 |     |     |
| CONNECT | 244 | 242 | 245 | 246 |
| CONNECT | 245 | 244 |     |     |
| CONNECT | 246 | 237 | 244 | 247 |
| CONNECT | 247 | 232 | 246 | 248 |
| CONNECT | 248 | 247 |     |     |
| CONNECT | 249 | 216 | 220 |     |
| CONNECT | 250 | 265 | 266 |     |
| CONNECT | 251 | 284 |     |     |
| CONNECT | 252 | 256 | 264 |     |
| CONNECT | 253 | 254 | 265 |     |
| CONNECT | 254 | 253 | 266 |     |
| CONNECT | 255 | 214 | 284 |     |
| CONNECT | 256 | 252 | 257 | 258 |
| CONNECT | 257 | 256 |     |     |
| CONNECT | 258 | 256 | 259 | 260 |
| CONNECT | 259 | 258 |     |     |
| CONNECT | 260 | 258 | 261 | 262 |
| CONNECT | 261 | 260 |     |     |
| CONNECT | 262 | 260 | 263 | 264 |
| CONNECT | 263 | 262 |     |     |
| CONNECT | 264 | 252 | 262 | 265 |
| CONNECT | 265 | 253 | 264 | 250 |
| CONNECT | 266 | 254 | 250 | 267 |
| CONNECT | 267 | 266 | 268 | 282 |
| CONNECT | 268 | 267 | 269 | 270 |
| CONNECT | 269 | 268 |     |     |
| CONNECT | 270 | 268 | 271 | 272 |
| CONNECT | 271 | 270 |     |     |
| CONNECT | 272 | 270 | 273 | 281 |
| CONNECT | 273 | 272 | 274 | 275 |
| CONNECT | 274 | 273 |     |     |
| CONNECT | 275 | 273 | 276 | 277 |
| CONNECT | 276 | 275 |     |     |
| CONNECT | 277 | 275 | 278 | 279 |
| CONNECT | 278 | 277 |     |     |
| CONNECT | 279 | 277 | 280 | 281 |
| CONNECT | 280 | 279 |     |     |
| CONNECT | 281 | 272 | 279 | 282 |
| CONNECT | 282 | 281 | 267 | 283 |
| CONNECT | 283 | 282 |     |     |
| CONNECT | 284 | 251 | 255 |     |
| CONNECT | 285 | 291 | 326 |     |
| CONNECT | 286 | 301 | 302 |     |
| CONNECT | 287 | 320 |     |     |
| CONNECT | 288 | 292 | 300 |     |
| CONNECT | 289 | 290 | 301 |     |
| CONNECT | 290 | 289 | 302 |     |
| CONNECT | 291 | 285 | 320 |     |

|         |     |     |     |     |
|---------|-----|-----|-----|-----|
| CONNECT | 292 | 288 | 293 | 294 |
| CONNECT | 293 | 292 |     |     |
| CONNECT | 294 | 292 | 295 | 296 |
| CONNECT | 295 | 294 |     |     |
| CONNECT | 296 | 294 | 297 | 298 |
| CONNECT | 297 | 296 |     |     |
| CONNECT | 298 | 296 | 299 | 300 |
| CONNECT | 299 | 298 |     |     |
| CONNECT | 300 | 288 | 298 | 301 |
| CONNECT | 301 | 300 | 286 | 289 |
| CONNECT | 302 | 286 | 290 | 303 |
| CONNECT | 303 | 302 | 304 | 318 |
| CONNECT | 304 | 303 | 305 | 306 |
| CONNECT | 305 | 304 |     |     |
| CONNECT | 306 | 304 | 307 | 308 |
| CONNECT | 307 | 306 |     |     |
| CONNECT | 308 | 306 | 309 | 317 |
| CONNECT | 309 | 308 | 310 | 311 |
| CONNECT | 310 | 309 |     |     |
| CONNECT | 311 | 309 | 312 | 313 |
| CONNECT | 312 | 311 |     |     |
| CONNECT | 313 | 311 | 314 | 315 |
| CONNECT | 314 | 313 |     |     |
| CONNECT | 315 | 313 | 316 | 317 |
| CONNECT | 316 | 315 |     |     |
| CONNECT | 317 | 308 | 315 | 318 |
| CONNECT | 318 | 317 | 303 | 319 |
| CONNECT | 319 | 318 |     |     |
| CONNECT | 320 | 287 | 291 |     |
| CONNECT | 321 | 336 | 337 |     |
| CONNECT | 322 | 355 |     |     |
| CONNECT | 323 | 327 | 335 |     |
| CONNECT | 324 | 325 | 336 |     |
| CONNECT | 325 | 324 | 337 |     |
| CONNECT | 326 | 285 | 355 |     |
| CONNECT | 327 | 323 | 328 | 329 |
| CONNECT | 328 | 327 |     |     |
| CONNECT | 329 | 327 | 330 | 331 |
| CONNECT | 330 | 329 |     |     |
| CONNECT | 331 | 329 | 332 | 333 |
| CONNECT | 332 | 331 |     |     |
| CONNECT | 333 | 331 | 334 | 335 |
| CONNECT | 334 | 333 |     |     |
| CONNECT | 335 | 323 | 333 | 336 |
| CONNECT | 336 | 321 | 324 | 335 |
| CONNECT | 337 | 321 | 325 | 338 |
| CONNECT | 338 | 337 | 339 | 353 |
| CONNECT | 339 | 338 | 340 | 341 |
| CONNECT | 340 | 339 |     |     |
| CONNECT | 341 | 339 | 342 | 343 |
| CONNECT | 342 | 341 |     |     |
| CONNECT | 343 | 341 | 344 | 352 |
| CONNECT | 344 | 343 | 345 | 346 |
| CONNECT | 345 | 344 |     |     |
| CONNECT | 346 | 344 | 347 | 348 |
| CONNECT | 347 | 346 |     |     |
| CONNECT | 348 | 346 | 349 | 350 |

|         |     |     |     |     |
|---------|-----|-----|-----|-----|
| CONNECT | 349 | 348 |     |     |
| CONNECT | 350 | 348 | 351 | 352 |
| CONNECT | 351 | 350 |     |     |
| CONNECT | 352 | 343 | 350 | 353 |
| CONNECT | 353 | 338 | 352 | 354 |
| CONNECT | 354 | 353 |     |     |
| CONNECT | 355 | 322 | 326 |     |
| CONNECT | 356 | 362 | 397 |     |
| CONNECT | 357 | 372 | 373 |     |
| CONNECT | 358 | 391 |     |     |
| CONNECT | 359 | 363 | 371 |     |
| CONNECT | 360 | 361 | 372 |     |
| CONNECT | 361 | 360 | 373 |     |
| CONNECT | 362 | 356 | 391 |     |
| CONNECT | 363 | 359 | 364 | 365 |
| CONNECT | 364 | 363 |     |     |
| CONNECT | 365 | 363 | 366 | 367 |
| CONNECT | 366 | 365 |     |     |
| CONNECT | 367 | 365 | 368 | 369 |
| CONNECT | 368 | 367 |     |     |
| CONNECT | 369 | 367 | 370 | 371 |
| CONNECT | 370 | 369 |     |     |
| CONNECT | 371 | 369 | 359 | 372 |
| CONNECT | 372 | 357 | 371 | 360 |
| CONNECT | 373 | 357 | 361 | 374 |
| CONNECT | 374 | 373 | 375 | 389 |
| CONNECT | 375 | 374 | 376 | 377 |
| CONNECT | 376 | 375 |     |     |
| CONNECT | 377 | 375 | 378 | 379 |
| CONNECT | 378 | 377 |     |     |
| CONNECT | 379 | 377 | 380 | 388 |
| CONNECT | 380 | 379 | 381 | 382 |
| CONNECT | 381 | 380 |     |     |
| CONNECT | 382 | 380 | 383 | 384 |
| CONNECT | 383 | 382 |     |     |
| CONNECT | 384 | 382 | 385 | 386 |
| CONNECT | 385 | 384 |     |     |
| CONNECT | 386 | 384 | 387 | 388 |
| CONNECT | 387 | 386 |     |     |
| CONNECT | 388 | 379 | 386 | 389 |
| CONNECT | 389 | 374 | 388 | 390 |
| CONNECT | 390 | 389 |     |     |
| CONNECT | 391 | 358 | 362 |     |
| CONNECT | 392 | 407 | 408 |     |
| CONNECT | 393 | 426 |     |     |
| CONNECT | 394 | 398 | 406 |     |
| CONNECT | 395 | 396 | 407 |     |
| CONNECT | 396 | 395 | 408 |     |
| CONNECT | 397 | 356 | 426 |     |
| CONNECT | 398 | 394 | 399 | 400 |
| CONNECT | 399 | 398 |     |     |
| CONNECT | 400 | 398 | 401 | 402 |
| CONNECT | 401 | 400 |     |     |
| CONNECT | 402 | 400 | 403 | 404 |
| CONNECT | 403 | 402 |     |     |
| CONNECT | 404 | 402 | 405 | 406 |
| CONNECT | 405 | 404 |     |     |



|        |     |     |     |     |
|--------|-----|-----|-----|-----|
| CONECT | 406 | 394 | 404 | 407 |
| CONECT | 407 | 395 | 392 | 406 |
| CONECT | 408 | 392 | 396 | 409 |
| CONECT | 409 | 408 | 410 | 424 |
| CONECT | 410 | 409 | 411 | 412 |
| CONECT | 411 | 410 |     |     |
| CONECT | 412 | 410 | 413 | 414 |
| CONECT | 413 | 412 |     |     |
| CONECT | 414 | 412 | 415 | 423 |
| CONECT | 415 | 414 | 416 | 417 |
| CONECT | 416 | 415 |     |     |
| CONECT | 417 | 415 | 418 | 419 |
| CONECT | 418 | 417 |     |     |
| CONECT | 419 | 417 | 420 | 421 |
| CONECT | 420 | 419 |     |     |
| CONECT | 421 | 419 | 422 | 423 |
| CONECT | 422 | 421 |     |     |
| CONECT | 423 | 414 | 421 | 424 |
| CONECT | 424 | 409 | 423 | 425 |
| CONECT | 425 | 424 |     |     |
| CONECT | 426 | 393 | 397 |     |
| CONECT | 427 | 433 | 468 |     |
| CONECT | 428 | 443 | 444 |     |
| CONECT | 429 | 462 |     |     |
| CONECT | 430 | 434 | 442 |     |
| CONECT | 431 | 432 | 443 |     |
| CONECT | 432 | 431 | 444 |     |
| CONECT | 433 | 427 | 462 |     |
| CONECT | 434 | 430 | 435 | 436 |
| CONECT | 435 | 434 |     |     |
| CONECT | 436 | 434 | 437 | 438 |
| CONECT | 437 | 436 |     |     |
| CONECT | 438 | 436 | 439 | 440 |
| CONECT | 439 | 438 |     |     |
| CONECT | 440 | 438 | 441 | 442 |
| CONECT | 441 | 440 |     |     |
| CONECT | 442 | 430 | 440 | 443 |
| CONECT | 443 | 428 | 442 | 431 |
| CONECT | 444 | 428 | 432 | 445 |
| CONECT | 445 | 444 | 446 | 460 |
| CONECT | 446 | 445 | 447 | 448 |
| CONECT | 447 | 446 |     |     |
| CONECT | 448 | 446 | 449 | 450 |
| CONECT | 449 | 448 |     |     |
| CONECT | 450 | 448 | 451 | 459 |
| CONECT | 451 | 450 | 452 | 453 |
| CONECT | 452 | 451 |     |     |
| CONECT | 453 | 451 | 454 | 455 |
| CONECT | 454 | 453 |     |     |
| CONECT | 455 | 453 | 456 | 457 |
| CONECT | 456 | 455 |     |     |
| CONECT | 457 | 455 | 458 | 459 |
| CONECT | 458 | 457 |     |     |
| CONECT | 459 | 450 | 457 | 460 |
| CONECT | 460 | 445 | 459 | 461 |
| CONECT | 461 | 460 |     |     |
| CONECT | 462 | 429 | 433 |     |

|        |     |     |     |     |
|--------|-----|-----|-----|-----|
| CONECT | 463 | 478 | 479 |     |
| CONECT | 464 | 497 |     |     |
| CONECT | 465 | 469 | 477 |     |
| CONECT | 466 | 467 | 478 |     |
| CONECT | 467 | 466 | 479 |     |
| CONECT | 468 | 427 | 497 |     |
| CONECT | 469 | 465 | 470 | 471 |
| CONECT | 470 | 469 |     |     |
| CONECT | 471 | 469 | 472 | 473 |
| CONECT | 472 | 471 |     |     |
| CONECT | 473 | 471 | 474 | 475 |
| CONECT | 474 | 473 |     |     |
| CONECT | 475 | 473 | 476 | 477 |
| CONECT | 476 | 475 |     |     |
| CONECT | 477 | 465 | 475 | 478 |
| CONECT | 478 | 466 | 477 | 463 |
| CONECT | 479 | 467 | 463 | 480 |
| CONECT | 480 | 479 | 481 | 495 |
| CONECT | 481 | 480 | 482 | 483 |
| CONECT | 482 | 481 |     |     |
| CONECT | 483 | 481 | 484 | 485 |
| CONECT | 484 | 483 |     |     |
| CONECT | 485 | 483 | 486 | 494 |
| CONECT | 486 | 485 | 487 | 488 |
| CONECT | 487 | 486 |     |     |
| CONECT | 488 | 486 | 489 | 490 |
| CONECT | 489 | 488 |     |     |
| CONECT | 490 | 488 | 491 | 492 |
| CONECT | 491 | 490 |     |     |
| CONECT | 492 | 490 | 493 | 494 |
| CONECT | 493 | 492 |     |     |
| CONECT | 494 | 485 | 492 | 495 |
| CONECT | 495 | 494 | 480 | 496 |
| CONECT | 496 | 495 |     |     |
| CONECT | 497 | 464 | 468 |     |
| CONECT | 499 | 514 | 515 |     |
| CONECT | 500 | 533 |     |     |
| CONECT | 501 | 505 | 513 |     |
| CONECT | 502 | 503 | 514 |     |
| CONECT | 503 | 502 | 515 |     |
| CONECT | 504 | 533 |     |     |
| CONECT | 505 | 501 | 506 | 507 |
| CONECT | 506 | 505 |     |     |
| CONECT | 507 | 505 | 508 | 509 |
| CONECT | 508 | 507 |     |     |
| CONECT | 509 | 507 | 510 | 511 |
| CONECT | 510 | 509 |     |     |
| CONECT | 511 | 509 | 512 | 513 |
| CONECT | 512 | 511 |     |     |
| CONECT | 513 | 511 | 501 | 514 |
| CONECT | 514 | 513 | 499 | 502 |
| CONECT | 515 | 499 | 503 | 516 |
| CONECT | 516 | 515 | 517 | 531 |
| CONECT | 517 | 516 | 518 | 519 |
| CONECT | 518 | 517 |     |     |
| CONECT | 519 | 517 | 520 | 521 |
| CONECT | 520 | 519 |     |     |

|        |     |     |     |     |
|--------|-----|-----|-----|-----|
| CONECT | 521 | 519 | 522 | 530 |
| CONECT | 522 | 521 | 523 | 524 |
| CONECT | 523 | 522 |     |     |
| CONECT | 524 | 522 | 525 | 526 |
| CONECT | 525 | 524 |     |     |
| CONECT | 526 | 524 | 527 | 528 |
| CONECT | 527 | 526 |     |     |
| CONECT | 528 | 526 | 529 | 530 |
| CONECT | 529 | 528 |     |     |
| CONECT | 530 | 528 | 521 | 531 |
| CONECT | 531 | 516 | 530 | 532 |
| CONECT | 532 | 531 |     |     |
| CONECT | 533 | 500 | 504 |     |
| CONECT | 534 | 549 | 550 |     |
| CONECT | 535 | 568 |     |     |
| CONECT | 536 | 540 | 548 |     |
| CONECT | 537 | 538 | 549 |     |
| CONECT | 538 | 537 | 550 |     |
| CONECT | 539 | 568 |     |     |
| CONECT | 540 | 536 | 541 | 542 |
| CONECT | 541 | 540 |     |     |
| CONECT | 542 | 540 | 543 | 544 |
| CONECT | 543 | 542 |     |     |
| CONECT | 544 | 542 | 545 | 546 |
| CONECT | 545 | 544 |     |     |
| CONECT | 546 | 544 | 547 | 548 |
| CONECT | 547 | 546 |     |     |
| CONECT | 548 | 536 | 546 | 549 |
| CONECT | 549 | 534 | 537 | 548 |
| CONECT | 550 | 534 | 538 | 551 |
| CONECT | 551 | 550 | 552 | 566 |
| CONECT | 552 | 551 | 553 | 554 |
| CONECT | 553 | 552 |     |     |
| CONECT | 554 | 552 | 555 | 556 |
| CONECT | 555 | 554 |     |     |
| CONECT | 556 | 554 | 557 | 565 |
| CONECT | 557 | 556 | 558 | 559 |
| CONECT | 558 | 557 |     |     |
| CONECT | 559 | 557 | 560 | 561 |
| CONECT | 560 | 559 |     |     |
| CONECT | 561 | 559 | 562 | 563 |
| CONECT | 562 | 561 |     |     |
| CONECT | 563 | 561 | 564 | 565 |
| CONECT | 564 | 563 |     |     |
| CONECT | 565 | 556 | 563 | 566 |
| CONECT | 566 | 551 | 565 | 567 |
| CONECT | 567 | 566 |     |     |
| CONECT | 568 | 535 | 539 |     |
| CONECT | 569 | 575 | 610 |     |
| CONECT | 570 | 585 | 586 |     |
| CONECT | 571 | 604 |     |     |
| CONECT | 572 | 576 | 584 |     |
| CONECT | 573 | 574 | 585 |     |
| CONECT | 574 | 573 | 586 |     |
| CONECT | 575 | 569 | 604 |     |
| CONECT | 576 | 572 | 577 | 578 |
| CONECT | 577 | 576 |     |     |

|        |     |     |     |     |
|--------|-----|-----|-----|-----|
| CONECT | 578 | 576 | 579 | 580 |
| CONECT | 579 | 578 |     |     |
| CONECT | 580 | 578 | 581 | 582 |
| CONECT | 581 | 580 |     |     |
| CONECT | 582 | 580 | 583 | 584 |
| CONECT | 583 | 582 |     |     |
| CONECT | 584 | 582 | 572 | 585 |
| CONECT | 585 | 570 | 573 | 584 |
| CONECT | 586 | 570 | 574 | 587 |
| CONECT | 587 | 586 | 588 | 602 |
| CONECT | 588 | 587 | 589 | 590 |
| CONECT | 589 | 588 |     |     |
| CONECT | 590 | 588 | 591 | 592 |
| CONECT | 591 | 590 |     |     |
| CONECT | 592 | 590 | 593 | 601 |
| CONECT | 593 | 592 | 594 | 595 |
| CONECT | 594 | 593 |     |     |
| CONECT | 595 | 593 | 596 | 597 |
| CONECT | 596 | 595 |     |     |
| CONECT | 597 | 595 | 598 | 599 |
| CONECT | 598 | 597 |     |     |
| CONECT | 599 | 597 | 600 | 601 |
| CONECT | 600 | 599 |     |     |
| CONECT | 601 | 592 | 599 | 602 |
| CONECT | 602 | 601 | 587 | 603 |
| CONECT | 603 | 602 |     |     |
| CONECT | 604 | 575 | 571 |     |
| CONECT | 605 | 620 | 621 |     |
| CONECT | 606 | 639 |     |     |
| CONECT | 607 | 611 | 619 |     |
| CONECT | 608 | 609 | 620 |     |
| CONECT | 609 | 608 | 621 |     |
| CONECT | 610 | 569 | 639 |     |
| CONECT | 611 | 607 | 612 | 613 |
| CONECT | 612 | 611 |     |     |
| CONECT | 613 | 611 | 614 | 615 |
| CONECT | 614 | 613 |     |     |
| CONECT | 615 | 613 | 616 | 617 |
| CONECT | 616 | 615 |     |     |
| CONECT | 617 | 615 | 618 | 619 |
| CONECT | 618 | 617 |     |     |
| CONECT | 619 | 607 | 617 | 620 |
| CONECT | 620 | 605 | 608 | 619 |
| CONECT | 621 | 605 | 609 | 622 |
| CONECT | 622 | 621 | 623 | 637 |
| CONECT | 623 | 622 | 624 | 625 |
| CONECT | 624 | 623 |     |     |
| CONECT | 625 | 623 | 626 | 627 |
| CONECT | 626 | 625 |     |     |
| CONECT | 627 | 625 | 628 | 636 |
| CONECT | 628 | 627 | 629 | 630 |
| CONECT | 629 | 628 |     |     |
| CONECT | 630 | 628 | 631 | 632 |
| CONECT | 631 | 630 |     |     |
| CONECT | 632 | 630 | 633 | 634 |
| CONECT | 633 | 632 |     |     |
| CONECT | 634 | 632 | 635 | 636 |

|         |     |     |     |     |
|---------|-----|-----|-----|-----|
| CONNECT | 635 | 634 |     |     |
| CONNECT | 636 | 627 | 634 | 637 |
| CONNECT | 637 | 622 | 636 | 638 |
| CONNECT | 638 | 637 |     |     |
| CONNECT | 639 | 606 | 610 |     |
| CONNECT | 640 | 646 | 681 |     |
| CONNECT | 641 | 656 | 657 |     |
| CONNECT | 642 | 675 |     |     |
| CONNECT | 643 | 647 | 655 |     |
| CONNECT | 644 | 645 | 656 |     |
| CONNECT | 645 | 644 | 657 |     |
| CONNECT | 646 | 640 | 675 |     |
| CONNECT | 647 | 643 | 648 | 649 |
| CONNECT | 648 | 647 |     |     |
| CONNECT | 649 | 647 | 650 | 651 |
| CONNECT | 650 | 649 |     |     |
| CONNECT | 651 | 649 | 652 | 653 |
| CONNECT | 652 | 651 |     |     |
| CONNECT | 653 | 651 | 654 | 655 |
| CONNECT | 654 | 653 |     |     |
| CONNECT | 655 | 643 | 653 | 656 |
| CONNECT | 656 | 655 | 641 | 644 |
| CONNECT | 657 | 641 | 645 | 658 |
| CONNECT | 658 | 657 | 659 | 673 |
| CONNECT | 659 | 658 | 660 | 661 |
| CONNECT | 660 | 659 |     |     |
| CONNECT | 661 | 659 | 662 | 663 |
| CONNECT | 662 | 661 |     |     |
| CONNECT | 663 | 661 | 664 | 672 |
| CONNECT | 664 | 663 | 665 | 666 |
| CONNECT | 665 | 664 |     |     |
| CONNECT | 666 | 664 | 667 | 668 |
| CONNECT | 667 | 666 |     |     |
| CONNECT | 668 | 666 | 669 | 670 |
| CONNECT | 669 | 668 |     |     |
| CONNECT | 670 | 668 | 671 | 672 |
| CONNECT | 671 | 670 |     |     |
| CONNECT | 672 | 663 | 670 | 673 |
| CONNECT | 673 | 672 | 658 | 674 |
| CONNECT | 674 | 673 |     |     |
| CONNECT | 675 | 642 | 646 |     |
| CONNECT | 676 | 691 | 692 |     |
| CONNECT | 677 | 710 |     |     |
| CONNECT | 678 | 682 | 690 |     |
| CONNECT | 679 | 680 | 691 |     |
| CONNECT | 680 | 679 | 692 |     |
| CONNECT | 681 | 640 | 710 |     |
| CONNECT | 682 | 678 | 683 | 684 |
| CONNECT | 683 | 682 |     |     |
| CONNECT | 684 | 682 | 685 | 686 |
| CONNECT | 685 | 684 |     |     |
| CONNECT | 686 | 684 | 687 | 688 |
| CONNECT | 687 | 686 |     |     |
| CONNECT | 688 | 686 | 689 | 690 |
| CONNECT | 689 | 688 |     |     |
| CONNECT | 690 | 678 | 688 | 691 |
| CONNECT | 691 | 676 | 679 | 690 |

|         |     |     |     |     |
|---------|-----|-----|-----|-----|
| CONNECT | 692 | 676 | 680 | 693 |
| CONNECT | 693 | 692 | 694 | 708 |
| CONNECT | 694 | 693 | 695 | 696 |
| CONNECT | 695 | 694 |     |     |
| CONNECT | 696 | 694 | 697 | 698 |
| CONNECT | 697 | 696 |     |     |
| CONNECT | 698 | 696 | 699 | 707 |
| CONNECT | 699 | 698 | 700 | 701 |
| CONNECT | 700 | 699 |     |     |
| CONNECT | 701 | 699 | 702 | 703 |
| CONNECT | 702 | 701 |     |     |
| CONNECT | 703 | 701 | 704 | 705 |
| CONNECT | 704 | 703 |     |     |
| CONNECT | 705 | 703 | 706 | 707 |
| CONNECT | 706 | 705 |     |     |
| CONNECT | 707 | 698 | 705 | 708 |
| CONNECT | 708 | 707 | 693 | 709 |
| CONNECT | 709 | 708 |     |     |
| CONNECT | 710 | 677 | 681 |     |
| CONNECT | 711 | 717 | 752 |     |
| CONNECT | 712 | 727 | 728 |     |
| CONNECT | 713 | 746 |     |     |
| CONNECT | 714 | 718 | 726 |     |
| CONNECT | 715 | 716 | 727 |     |
| CONNECT | 716 | 715 | 728 |     |
| CONNECT | 717 | 711 | 746 |     |
| CONNECT | 718 | 714 | 719 | 720 |
| CONNECT | 719 | 718 |     |     |
| CONNECT | 720 | 718 | 721 | 722 |
| CONNECT | 721 | 720 |     |     |
| CONNECT | 722 | 720 | 723 | 724 |
| CONNECT | 723 | 722 |     |     |
| CONNECT | 724 | 722 | 725 | 726 |
| CONNECT | 725 | 724 |     |     |
| CONNECT | 726 | 724 | 714 | 727 |
| CONNECT | 727 | 712 | 726 | 715 |
| CONNECT | 728 | 712 | 716 | 729 |
| CONNECT | 729 | 728 | 730 | 744 |
| CONNECT | 730 | 729 | 731 | 732 |
| CONNECT | 731 | 730 |     |     |
| CONNECT | 732 | 730 | 733 | 734 |
| CONNECT | 733 | 732 |     |     |
| CONNECT | 734 | 732 | 735 | 743 |
| CONNECT | 735 | 734 | 736 | 737 |
| CONNECT | 736 | 735 |     |     |
| CONNECT | 737 | 735 | 738 | 739 |
| CONNECT | 738 | 737 |     |     |
| CONNECT | 739 | 737 | 740 | 741 |
| CONNECT | 740 | 739 |     |     |
| CONNECT | 741 | 739 | 742 | 743 |
| CONNECT | 742 | 741 |     |     |
| CONNECT | 743 | 734 | 741 | 744 |
| CONNECT | 744 | 729 | 743 | 745 |
| CONNECT | 745 | 744 |     |     |
| CONNECT | 746 | 713 | 717 |     |
| CONNECT | 747 | 762 | 763 |     |
| CONNECT | 748 | 781 |     |     |

|        |     |     |     |     |
|--------|-----|-----|-----|-----|
| CONECT | 749 | 753 | 761 |     |
| CONECT | 750 | 751 | 762 |     |
| CONECT | 751 | 750 | 763 |     |
| CONECT | 752 | 711 | 781 |     |
| CONECT | 753 | 749 | 754 | 755 |
| CONECT | 754 | 753 |     |     |
| CONECT | 755 | 753 | 756 | 757 |
| CONECT | 756 | 755 |     |     |
| CONECT | 757 | 755 | 758 | 759 |
| CONECT | 758 | 757 |     |     |
| CONECT | 759 | 757 | 760 | 761 |
| CONECT | 760 | 759 |     |     |
| CONECT | 761 | 749 | 759 | 762 |
| CONECT | 762 | 750 | 761 | 747 |
| CONECT | 763 | 751 | 747 | 764 |
| CONECT | 764 | 763 | 765 | 779 |
| CONECT | 765 | 764 | 766 | 767 |
| CONECT | 766 | 765 |     |     |
| CONECT | 767 | 765 | 768 | 769 |
| CONECT | 768 | 767 |     |     |
| CONECT | 769 | 767 | 770 | 778 |
| CONECT | 770 | 769 | 771 | 772 |
| CONECT | 771 | 770 |     |     |
| CONECT | 772 | 770 | 773 | 774 |
| CONECT | 773 | 772 |     |     |
| CONECT | 774 | 772 | 775 | 776 |
| CONECT | 775 | 774 |     |     |
| CONECT | 776 | 774 | 777 | 778 |
| CONECT | 777 | 776 |     |     |
| CONECT | 778 | 769 | 776 | 779 |
| CONECT | 779 | 764 | 778 | 780 |
| CONECT | 780 | 779 |     |     |
| CONECT | 781 | 748 | 752 |     |
| CONECT | 782 | 788 | 823 |     |
| CONECT | 783 | 798 | 799 |     |
| CONECT | 784 | 817 |     |     |
| CONECT | 785 | 789 | 797 |     |
| CONECT | 786 | 787 | 798 |     |
| CONECT | 787 | 786 | 799 |     |
| CONECT | 788 | 782 | 817 |     |
| CONECT | 789 | 785 | 790 | 791 |
| CONECT | 790 | 789 |     |     |
| CONECT | 791 | 789 | 792 | 793 |
| CONECT | 792 | 791 |     |     |
| CONECT | 793 | 791 | 794 | 795 |
| CONECT | 794 | 793 |     |     |
| CONECT | 795 | 793 | 796 | 797 |
| CONECT | 796 | 795 |     |     |
| CONECT | 797 | 795 | 785 | 798 |
| CONECT | 798 | 797 | 783 | 786 |
| CONECT | 799 | 783 | 787 | 800 |
| CONECT | 800 | 799 | 801 | 815 |
| CONECT | 801 | 800 | 802 | 803 |
| CONECT | 802 | 801 |     |     |
| CONECT | 803 | 801 | 804 | 805 |
| CONECT | 804 | 803 |     |     |
| CONECT | 805 | 803 | 806 | 814 |

|         |     |     |     |     |
|---------|-----|-----|-----|-----|
| CONNECT | 806 | 805 | 807 | 808 |
| CONNECT | 807 | 806 |     |     |
| CONNECT | 808 | 806 | 809 | 810 |
| CONNECT | 809 | 808 |     |     |
| CONNECT | 810 | 808 | 811 | 812 |
| CONNECT | 811 | 810 |     |     |
| CONNECT | 812 | 810 | 813 | 814 |
| CONNECT | 813 | 812 |     |     |
| CONNECT | 814 | 812 | 805 | 815 |
| CONNECT | 815 | 814 | 800 | 816 |
| CONNECT | 816 | 815 |     |     |
| CONNECT | 817 | 784 | 788 |     |
| CONNECT | 818 | 833 | 834 |     |
| CONNECT | 819 | 852 |     |     |
| CONNECT | 820 | 824 | 832 |     |
| CONNECT | 821 | 822 | 833 |     |
| CONNECT | 822 | 821 | 834 |     |
| CONNECT | 823 | 782 | 852 |     |
| CONNECT | 824 | 820 | 825 | 826 |
| CONNECT | 825 | 824 |     |     |
| CONNECT | 826 | 824 | 827 | 828 |
| CONNECT | 827 | 826 |     |     |
| CONNECT | 828 | 826 | 829 | 830 |
| CONNECT | 829 | 828 |     |     |
| CONNECT | 830 | 828 | 831 | 832 |
| CONNECT | 831 | 830 |     |     |
| CONNECT | 832 | 820 | 830 | 833 |
| CONNECT | 833 | 818 | 821 | 832 |
| CONNECT | 834 | 818 | 822 | 835 |
| CONNECT | 835 | 834 | 836 | 850 |
| CONNECT | 836 | 835 | 837 | 838 |
| CONNECT | 837 | 836 |     |     |
| CONNECT | 838 | 836 | 839 | 840 |
| CONNECT | 839 | 838 |     |     |
| CONNECT | 840 | 838 | 841 | 849 |
| CONNECT | 841 | 840 | 842 | 843 |
| CONNECT | 842 | 841 |     |     |
| CONNECT | 843 | 841 | 844 | 845 |
| CONNECT | 844 | 843 |     |     |
| CONNECT | 845 | 843 | 846 | 847 |
| CONNECT | 846 | 845 |     |     |
| CONNECT | 847 | 845 | 848 | 849 |
| CONNECT | 848 | 847 |     |     |
| CONNECT | 849 | 840 | 847 | 850 |
| CONNECT | 850 | 835 | 849 | 851 |
| CONNECT | 851 | 850 |     |     |
| CONNECT | 852 | 819 | 823 |     |
| CONNECT | 853 | 859 | 894 |     |
| CONNECT | 854 | 869 | 870 |     |
| CONNECT | 855 | 888 |     |     |
| CONNECT | 856 | 860 | 868 |     |
| CONNECT | 857 | 858 | 869 |     |
| CONNECT | 858 | 857 | 870 |     |
| CONNECT | 859 | 853 | 888 |     |
| CONNECT | 860 | 856 | 861 | 862 |
| CONNECT | 861 | 860 |     |     |
| CONNECT | 862 | 860 | 863 | 864 |



|         |     |     |     |     |
|---------|-----|-----|-----|-----|
| CONNECT | 863 | 862 |     |     |
| CONNECT | 864 | 862 | 865 | 866 |
| CONNECT | 865 | 864 |     |     |
| CONNECT | 866 | 864 | 867 | 868 |
| CONNECT | 867 | 866 |     |     |
| CONNECT | 868 | 856 | 866 | 869 |
| CONNECT | 869 | 868 | 854 | 857 |
| CONNECT | 870 | 854 | 858 | 871 |
| CONNECT | 871 | 870 | 872 | 886 |
| CONNECT | 872 | 871 | 873 | 874 |
| CONNECT | 873 | 872 |     |     |
| CONNECT | 874 | 872 | 875 | 876 |
| CONNECT | 875 | 874 |     |     |
| CONNECT | 876 | 874 | 877 | 885 |
| CONNECT | 877 | 876 | 878 | 879 |
| CONNECT | 878 | 877 |     |     |
| CONNECT | 879 | 877 | 880 | 881 |
| CONNECT | 880 | 879 |     |     |
| CONNECT | 881 | 879 | 882 | 883 |
| CONNECT | 882 | 881 |     |     |
| CONNECT | 883 | 881 | 884 | 885 |
| CONNECT | 884 | 883 |     |     |
| CONNECT | 885 | 883 | 876 | 886 |
| CONNECT | 886 | 885 | 871 | 887 |
| CONNECT | 887 | 886 |     |     |
| CONNECT | 888 | 855 | 859 |     |
| CONNECT | 889 | 904 | 905 |     |
| CONNECT | 890 | 923 |     |     |
| CONNECT | 891 | 895 | 903 |     |
| CONNECT | 892 | 893 | 904 |     |
| CONNECT | 893 | 892 | 905 |     |
| CONNECT | 894 | 853 | 923 |     |
| CONNECT | 895 | 891 | 896 | 897 |
| CONNECT | 896 | 895 |     |     |
| CONNECT | 897 | 895 | 898 | 899 |
| CONNECT | 898 | 897 |     |     |
| CONNECT | 899 | 897 | 900 | 901 |
| CONNECT | 900 | 899 |     |     |
| CONNECT | 901 | 899 | 902 | 903 |
| CONNECT | 902 | 901 |     |     |
| CONNECT | 903 | 891 | 901 | 904 |
| CONNECT | 904 | 889 | 892 | 903 |
| CONNECT | 905 | 889 | 893 | 906 |
| CONNECT | 906 | 905 | 907 | 921 |
| CONNECT | 907 | 906 | 908 | 909 |
| CONNECT | 908 | 907 |     |     |
| CONNECT | 909 | 907 | 910 | 911 |
| CONNECT | 910 | 909 |     |     |
| CONNECT | 911 | 909 | 912 | 920 |
| CONNECT | 912 | 911 | 913 | 914 |
| CONNECT | 913 | 912 |     |     |
| CONNECT | 914 | 912 | 915 | 916 |
| CONNECT | 915 | 914 |     |     |
| CONNECT | 916 | 914 | 917 | 918 |
| CONNECT | 917 | 916 |     |     |
| CONNECT | 918 | 916 | 919 | 920 |
| CONNECT | 919 | 918 |     |     |

|         |     |     |     |     |
|---------|-----|-----|-----|-----|
| CONNECT | 920 | 911 | 918 | 921 |
| CONNECT | 921 | 906 | 920 | 922 |
| CONNECT | 922 | 921 |     |     |
| CONNECT | 923 | 890 | 894 |     |
| CONNECT | 924 | 930 | 965 |     |
| CONNECT | 925 | 940 | 941 |     |
| CONNECT | 926 | 959 |     |     |
| CONNECT | 927 | 931 | 939 |     |
| CONNECT | 928 | 929 | 940 |     |
| CONNECT | 929 | 928 | 941 |     |
| CONNECT | 930 | 924 | 959 |     |
| CONNECT | 931 | 927 | 932 | 933 |
| CONNECT | 932 | 931 |     |     |
| CONNECT | 933 | 931 | 934 | 935 |
| CONNECT | 934 | 933 |     |     |
| CONNECT | 935 | 933 | 936 | 937 |
| CONNECT | 936 | 935 |     |     |
| CONNECT | 937 | 935 | 938 | 939 |
| CONNECT | 938 | 937 |     |     |
| CONNECT | 939 | 937 | 927 | 940 |
| CONNECT | 940 | 925 | 928 | 939 |
| CONNECT | 941 | 925 | 929 | 942 |
| CONNECT | 942 | 941 | 943 | 957 |
| CONNECT | 943 | 942 | 944 | 945 |
| CONNECT | 944 | 943 |     |     |
| CONNECT | 945 | 943 | 946 | 947 |
| CONNECT | 946 | 945 |     |     |
| CONNECT | 947 | 945 | 948 | 956 |
| CONNECT | 948 | 947 | 949 | 950 |
| CONNECT | 949 | 948 |     |     |
| CONNECT | 950 | 948 | 951 | 952 |
| CONNECT | 951 | 950 |     |     |
| CONNECT | 952 | 950 | 953 | 954 |
| CONNECT | 953 | 952 |     |     |
| CONNECT | 954 | 952 | 955 | 956 |
| CONNECT | 955 | 954 |     |     |
| CONNECT | 956 | 947 | 954 | 957 |
| CONNECT | 957 | 942 | 956 | 958 |
| CONNECT | 958 | 957 |     |     |
| CONNECT | 959 | 926 | 930 |     |
| CONNECT | 960 | 975 | 976 |     |
| CONNECT | 961 | 994 |     |     |
| CONNECT | 962 | 966 | 974 |     |
| CONNECT | 963 | 964 | 975 |     |
| CONNECT | 964 | 963 | 976 |     |
| CONNECT | 965 | 924 | 994 |     |
| CONNECT | 966 | 962 | 967 | 968 |
| CONNECT | 967 | 966 |     |     |
| CONNECT | 968 | 966 | 969 | 970 |
| CONNECT | 969 | 968 |     |     |
| CONNECT | 970 | 968 | 971 | 972 |
| CONNECT | 971 | 970 |     |     |
| CONNECT | 972 | 970 | 973 | 974 |
| CONNECT | 973 | 972 |     |     |
| CONNECT | 974 | 962 | 972 | 975 |
| CONNECT | 975 | 963 | 960 | 974 |
| CONNECT | 976 | 960 | 964 | 977 |

CONNECT 977 976 978 992  
CONNECT 978 977 979 980  
CONNECT 979 978  
CONNECT 980 978 981 982  
CONNECT 981 980  
CONNECT 982 980 983 991  
CONNECT 983 982 984 985  
CONNECT 984 983  
CONNECT 985 983 986 987  
CONNECT 986 985  
CONNECT 987 985 988 989  
CONNECT 988 987  
CONNECT 989 987 990 991  
CONNECT 990 989  
CONNECT 991 982 989 992  
CONNECT 992 977 991 993  
CONNECT 993 992  
CONNECT 994 961 965  
CONNECT 995 1001 1036  
CONNECT 996 1011 1012  
CONNECT 997 1030  
CONNECT 998 1002 1010  
CONNECT 999 1000 1011  
CONNECT 1000 999 1012  
CONNECT 1001 995 1030  
CONNECT 1002 998 1003 1004  
CONNECT 1003 1002  
CONNECT 1004 1002 1005 1006  
CONNECT 1005 1004  
CONNECT 1006 1004 1007 1008  
CONNECT 1007 1006  
CONNECT 1008 1006 1009 1010  
CONNECT 1009 1008  
CONNECT 1010 1008 998 1011  
CONNECT 1011 996 999 1010  
CONNECT 1012 996 1000 1013  
CONNECT 1013 1012 1014 1028  
CONNECT 1014 1013 1015 1016  
CONNECT 1015 1014  
CONNECT 1016 1014 1017 1018  
CONNECT 1017 1016  
CONNECT 1018 1016 1019 1027  
CONNECT 1019 1018 1020 1021  
CONNECT 1020 1019  
CONNECT 1021 1019 1022 1023  
CONNECT 1022 1021  
CONNECT 1023 1021 1024 1025  
CONNECT 1024 1023  
CONNECT 1025 1023 1026 1027  
CONNECT 1026 1025  
CONNECT 1027 1025 1018 1028  
CONNECT 1028 1013 1027 1029  
CONNECT 1029 1028  
CONNECT 1030 997 1001  
CONNECT 1031 1046 1047  
CONNECT 1032 1065  
CONNECT 1033 1037 1045

```

CONNECT 1034 1035 1046
CONNECT 1035 1034 1047
CONNECT 1036 995 1065
CONNECT 1037 1033 1038 1039
CONNECT 1038 1037
CONNECT 1039 1037 1040 1041
CONNECT 1040 1039
CONNECT 1041 1039 1042 1043
CONNECT 1042 1041
CONNECT 1043 1041 1044 1045
CONNECT 1044 1043
CONNECT 1045 1033 1043 1046
CONNECT 1046 1034 1045 1031
CONNECT 1047 1035 1031 1048
CONNECT 1048 1047 1049 1063
CONNECT 1049 1048 1050 1051
CONNECT 1050 1049
CONNECT 1051 1049 1052 1053
CONNECT 1052 1051
CONNECT 1053 1051 1054 1062
CONNECT 1054 1053 1055 1056
CONNECT 1055 1054
CONNECT 1056 1054 1057 1058
CONNECT 1057 1056
CONNECT 1058 1056 1059 1060
CONNECT 1059 1058
CONNECT 1060 1058 1061 1062
CONNECT 1061 1060
CONNECT 1062 1053 1060 1063
CONNECT 1063 1048 1062 1064
CONNECT 1064 1063
CONNECT 1065 1032 1036

```

**Table 3.** PDB file of the optimised structure of the 15-nuclear model of the LS centre in Zn matrix

```

TITLE          CSD ENTRY jmk-126-09
REMARK        1 File created by GaussView 6.0.16
HETATM        1 Zn          0      19.114   5.736   0.752
Zn
HETATM        2 S           0      14.656   5.034  -0.111
S
HETATM        3 S           0      20.181   3.097  -3.176
S
HETATM        4 N           0      18.096   6.982  -0.749
N
HETATM        5 N           0      17.061   4.943   0.688
N
HETATM        6 N           0      16.435   3.925   1.358
N
HETATM        7 N           0      19.645   4.432  -0.793
N
HETATM        8 C           0      18.636   7.955  -1.467
C
HETATM        9 H           0      19.564   8.132  -1.367
H
HETATM       10 C           0      19.855   3.876  -1.789
C

```

|        |    |   |   |        |        |        |
|--------|----|---|---|--------|--------|--------|
| HETATM | 11 | C | 0 | 17.909 | 8.725  | -2.355 |
| C      |    |   |   |        |        |        |
| HETATM | 12 | H | 0 | 18.333 | 9.416  | -2.850 |
| H      |    |   |   |        |        |        |
| HETATM | 13 | C | 0 | 16.574 | 8.485  | -2.516 |
| C      |    |   |   |        |        |        |
| HETATM | 14 | H | 0 | 16.058 | 9.013  | -3.115 |
| H      |    |   |   |        |        |        |
| HETATM | 15 | C | 0 | 15.983 | 7.461  | -1.793 |
| C      |    |   |   |        |        |        |
| HETATM | 16 | H | 0 | 15.058 | 7.268  | -1.891 |
| H      |    |   |   |        |        |        |
| HETATM | 17 | C | 0 | 16.775 | 6.721  | -0.920 |
| C      |    |   |   |        |        |        |
| HETATM | 18 | C | 0 | 16.274 | 5.615  | -0.116 |
| C      |    |   |   |        |        |        |
| HETATM | 19 | C | 0 | 15.156 | 3.852  | 1.050  |
| C      |    |   |   |        |        |        |
| HETATM | 20 | C | 0 | 14.221 | 2.885  | 1.642  |
| C      |    |   |   |        |        |        |
| HETATM | 21 | C | 0 | 14.698 | 1.833  | 2.446  |
| C      |    |   |   |        |        |        |
| HETATM | 22 | H | 0 | 15.631 | 1.736  | 2.592  |
| H      |    |   |   |        |        |        |
| HETATM | 23 | C | 0 | 13.833 | 0.958  | 3.012  |
| C      |    |   |   |        |        |        |
| HETATM | 24 | H | 0 | 14.173 | 0.235  | 3.525  |
| H      |    |   |   |        |        |        |
| HETATM | 25 | C | 0 | 12.414 | 1.102  | 2.853  |
| C      |    |   |   |        |        |        |
| HETATM | 26 | C | 0 | 11.501 | 0.235  | 3.454  |
| C      |    |   |   |        |        |        |
| HETATM | 27 | H | 0 | 11.818 | -0.476 | 4.000  |
| H      |    |   |   |        |        |        |
| HETATM | 28 | C | 0 | 10.147 | 0.400  | 3.266  |
| C      |    |   |   |        |        |        |
| HETATM | 29 | H | 0 | 9.535  | -0.209 | 3.665  |
| H      |    |   |   |        |        |        |
| HETATM | 30 | C | 0 | 9.671  | 1.450  | 2.496  |
| C      |    |   |   |        |        |        |
| HETATM | 31 | H | 0 | 8.736  | 1.565  | 2.385  |
| H      |    |   |   |        |        |        |
| HETATM | 32 | C | 0 | 10.539 | 2.328  | 1.890  |
| C      |    |   |   |        |        |        |
| HETATM | 33 | H | 0 | 10.204 | 3.044  | 1.363  |
| H      |    |   |   |        |        |        |
| HETATM | 34 | C | 0 | 11.949 | 2.159  | 2.054  |
| C      |    |   |   |        |        |        |
| HETATM | 35 | C | 0 | 12.862 | 3.033  | 1.449  |
| C      |    |   |   |        |        |        |
| HETATM | 36 | H | 0 | 12.542 | 3.738  | 0.896  |
| H      |    |   |   |        |        |        |
| HETATM | 37 | S | 0 | 23.571 | 6.438  | 1.614  |
| S      |    |   |   |        |        |        |
| HETATM | 38 | S | 0 | 18.047 | 8.375  | 4.680  |
| S      |    |   |   |        |        |        |

|        |    |   |   |        |        |        |
|--------|----|---|---|--------|--------|--------|
| HETATM | 39 | N | 0 | 20.131 | 4.491  | 2.253  |
| N      |    |   |   |        |        |        |
| HETATM | 40 | N | 0 | 21.167 | 6.528  | 0.815  |
| N      |    |   |   |        |        |        |
| HETATM | 41 | N | 0 | 21.793 | 7.546  | 0.145  |
| N      |    |   |   |        |        |        |
| HETATM | 42 | N | 0 | 18.582 | 7.040  | 2.296  |
| N      |    |   |   |        |        |        |
| HETATM | 43 | C | 0 | 19.592 | 3.517  | 2.970  |
| C      |    |   |   |        |        |        |
| HETATM | 44 | H | 0 | 18.664 | 3.340  | 2.871  |
| H      |    |   |   |        |        |        |
| HETATM | 45 | C | 0 | 18.373 | 7.595  | 3.292  |
| C      |    |   |   |        |        |        |
| HETATM | 46 | C | 0 | 20.319 | 2.747  | 3.859  |
| C      |    |   |   |        |        |        |
| HETATM | 47 | H | 0 | 19.894 | 2.057  | 4.353  |
| H      |    |   |   |        |        |        |
| HETATM | 48 | C | 0 | 21.654 | 2.986  | 4.019  |
| C      |    |   |   |        |        |        |
| HETATM | 49 | H | 0 | 22.169 | 2.459  | 4.618  |
| H      |    |   |   |        |        |        |
| HETATM | 50 | C | 0 | 22.245 | 4.010  | 3.296  |
| C      |    |   |   |        |        |        |
| HETATM | 51 | H | 0 | 23.170 | 4.204  | 3.395  |
| H      |    |   |   |        |        |        |
| HETATM | 52 | C | 0 | 21.453 | 4.750  | 2.424  |
| C      |    |   |   |        |        |        |
| HETATM | 53 | C | 0 | 21.954 | 5.857  | 1.619  |
| C      |    |   |   |        |        |        |
| HETATM | 54 | C | 0 | 23.071 | 7.620  | 0.453  |
| C      |    |   |   |        |        |        |
| HETATM | 55 | C | 0 | 24.007 | 8.587  | -0.139 |
| C      |    |   |   |        |        |        |
| HETATM | 56 | C | 0 | 23.530 | 9.639  | -0.943 |
| C      |    |   |   |        |        |        |
| HETATM | 57 | H | 0 | 22.596 | 9.736  | -1.088 |
| H      |    |   |   |        |        |        |
| HETATM | 58 | C | 0 | 24.395 | 10.514 | -1.509 |
| C      |    |   |   |        |        |        |
| HETATM | 59 | H | 0 | 24.054 | 11.237 | -2.023 |
| H      |    |   |   |        |        |        |
| HETATM | 60 | C | 0 | 25.815 | 10.370 | -1.350 |
| C      |    |   |   |        |        |        |
| HETATM | 61 | C | 0 | 26.727 | 11.237 | -1.951 |
| C      |    |   |   |        |        |        |
| HETATM | 62 | H | 0 | 26.410 | 11.948 | -2.496 |
| H      |    |   |   |        |        |        |
| HETATM | 63 | C | 0 | 28.081 | 11.073 | -1.763 |
| C      |    |   |   |        |        |        |
| HETATM | 64 | H | 0 | 28.692 | 11.681 | -2.162 |
| H      |    |   |   |        |        |        |
| HETATM | 65 | C | 0 | 28.556 | 10.022 | -0.993 |
| C      |    |   |   |        |        |        |
| HETATM | 66 | H | 0 | 29.492 | 9.906  | -0.883 |
| H      |    |   |   |        |        |        |

|        |    |    |   |        |         |        |
|--------|----|----|---|--------|---------|--------|
| HETATM | 67 | C  | 0 | 27.688 | 9.145   | -0.387 |
| C      |    |    |   |        |         |        |
| HETATM | 68 | H  | 0 | 28.024 | 8.428   | 0.140  |
| H      |    |    |   |        |         |        |
| HETATM | 69 | C  | 0 | 26.278 | 9.313   | -0.551 |
| C      |    |    |   |        |         |        |
| HETATM | 70 | C  | 0 | 25.366 | 8.438   | 0.054  |
| C      |    |    |   |        |         |        |
| HETATM | 71 | H  | 0 | 25.686 | 7.734   | 0.607  |
| H      |    |    |   |        |         |        |
| HETATM | 72 | Zn | 0 | 14.899 | -5.588  | 0.280  |
| Zn     |    |    |   |        |         |        |
| HETATM | 73 | S  | 0 | 10.441 | -6.290  | -0.582 |
| S      |    |    |   |        |         |        |
| HETATM | 74 | S  | 0 | 15.966 | -8.227  | -3.648 |
| S      |    |    |   |        |         |        |
| HETATM | 75 | N  | 0 | 13.882 | -4.342  | -1.220 |
| N      |    |    |   |        |         |        |
| HETATM | 76 | N  | 0 | 12.846 | -6.380  | 0.217  |
| N      |    |    |   |        |         |        |
| HETATM | 77 | N  | 0 | 12.219 | -7.399  | 0.887  |
| N      |    |    |   |        |         |        |
| HETATM | 78 | N  | 0 | 15.430 | -6.892  | -1.264 |
| N      |    |    |   |        |         |        |
| HETATM | 79 | C  | 0 | 14.420 | -3.369  | -1.938 |
| C      |    |    |   |        |         |        |
| HETATM | 80 | H  | 0 | 15.348 | -3.192  | -1.839 |
| H      |    |    |   |        |         |        |
| HETATM | 81 | C  | 0 | 15.639 | -7.447  | -2.260 |
| C      |    |    |   |        |         |        |
| HETATM | 82 | C  | 0 | 13.693 | -2.599  | -2.827 |
| C      |    |    |   |        |         |        |
| HETATM | 83 | H  | 0 | 14.118 | -1.908  | -3.321 |
| H      |    |    |   |        |         |        |
| HETATM | 84 | C  | 0 | 12.359 | -2.838  | -2.988 |
| C      |    |    |   |        |         |        |
| HETATM | 85 | H  | 0 | 11.843 | -2.311  | -3.586 |
| H      |    |    |   |        |         |        |
| HETATM | 86 | C  | 0 | 11.768 | -3.862  | -2.264 |
| C      |    |    |   |        |         |        |
| HETATM | 87 | H  | 0 | 10.842 | -4.056  | -2.363 |
| H      |    |    |   |        |         |        |
| HETATM | 88 | C  | 0 | 12.559 | -4.602  | -1.392 |
| C      |    |    |   |        |         |        |
| HETATM | 89 | C  | 0 | 12.058 | -5.709  | -0.587 |
| C      |    |    |   |        |         |        |
| HETATM | 90 | C  | 0 | 10.941 | -7.473  | 0.579  |
| C      |    |    |   |        |         |        |
| HETATM | 91 | C  | 0 | 10.006 | -8.438  | 1.172  |
| C      |    |    |   |        |         |        |
| HETATM | 92 | C  | 0 | 10.483 | -9.491  | 1.975  |
| C      |    |    |   |        |         |        |
| HETATM | 93 | H  | 0 | 11.417 | -9.588  | 2.120  |
| H      |    |    |   |        |         |        |
| HETATM | 94 | C  | 0 | 9.617  | -10.366 | 2.540  |
| C      |    |    |   |        |         |        |

|        |     |   |   |        |         |        |
|--------|-----|---|---|--------|---------|--------|
| HETATM | 95  | H | 0 | 9.958  | -11.089 | 3.055  |
| H      |     |   |   |        |         |        |
| HETATM | 96  | C | 0 | 8.198  | -10.222 | 2.382  |
| C      |     |   |   |        |         |        |
| HETATM | 97  | C | 0 | 7.286  | -11.089 | 2.983  |
| C      |     |   |   |        |         |        |
| HETATM | 98  | H | 0 | 7.603  | -11.800 | 3.528  |
| H      |     |   |   |        |         |        |
| HETATM | 99  | C | 0 | 5.932  | -10.924 | 2.794  |
| C      |     |   |   |        |         |        |
| HETATM | 100 | H | 0 | 5.321  | -11.533 | 3.194  |
| H      |     |   |   |        |         |        |
| HETATM | 101 | C | 0 | 5.457  | -9.873  | 2.025  |
| C      |     |   |   |        |         |        |
| HETATM | 102 | H | 0 | 4.520  | -9.758  | 1.914  |
| H      |     |   |   |        |         |        |
| HETATM | 103 | C | 0 | 6.325  | -8.997  | 1.419  |
| C      |     |   |   |        |         |        |
| HETATM | 104 | H | 0 | 5.989  | -8.281  | 0.893  |
| H      |     |   |   |        |         |        |
| HETATM | 105 | C | 0 | 7.735  | -9.164  | 1.583  |
| C      |     |   |   |        |         |        |
| HETATM | 106 | C | 0 | 8.647  | -8.290  | 0.977  |
| C      |     |   |   |        |         |        |
| HETATM | 107 | H | 0 | 8.326  | -7.586  | 0.426  |
| H      |     |   |   |        |         |        |
| HETATM | 108 | S | 0 | 19.357 | -4.886  | 1.143  |
| S      |     |   |   |        |         |        |
| HETATM | 109 | S | 0 | 13.831 | -2.949  | 4.208  |
| S      |     |   |   |        |         |        |
| HETATM | 110 | N | 0 | 15.916 | -6.833  | 1.781  |
| N      |     |   |   |        |         |        |
| HETATM | 111 | N | 0 | 16.951 | -4.794  | 0.344  |
| N      |     |   |   |        |         |        |
| HETATM | 112 | N | 0 | 17.577 | -3.777  | -0.326 |
| N      |     |   |   |        |         |        |
| HETATM | 113 | N | 0 | 14.367 | -4.284  | 1.826  |
| N      |     |   |   |        |         |        |
| HETATM | 114 | C | 0 | 15.376 | -7.807  | 2.499  |
| C      |     |   |   |        |         |        |
| HETATM | 115 | H | 0 | 14.448 | -7.984  | 2.399  |
| H      |     |   |   |        |         |        |
| HETATM | 116 | C | 0 | 14.158 | -3.728  | 2.821  |
| C      |     |   |   |        |         |        |
| HETATM | 117 | C | 0 | 16.104 | -8.577  | 3.388  |
| C      |     |   |   |        |         |        |
| HETATM | 118 | H | 0 | 15.679 | -9.267  | 3.883  |
| H      |     |   |   |        |         |        |
| HETATM | 119 | C | 0 | 17.438 | -8.337  | 3.548  |
| C      |     |   |   |        |         |        |
| HETATM | 120 | H | 0 | 17.954 | -8.865  | 4.147  |
| H      |     |   |   |        |         |        |
| HETATM | 121 | C | 0 | 18.029 | -7.313  | 2.826  |
| C      |     |   |   |        |         |        |
| HETATM | 122 | H | 0 | 18.954 | -7.120  | 2.924  |
| H      |     |   |   |        |         |        |



|        |     |    |   |        |         |        |
|--------|-----|----|---|--------|---------|--------|
| HETATM | 123 | C  | 0 | 17.238 | -6.572  | 1.953  |
| C      |     |    |   |        |         |        |
| HETATM | 124 | C  | 0 | 17.738 | -5.467  | 1.148  |
| C      |     |    |   |        |         |        |
| HETATM | 125 | C  | 0 | 18.856 | -3.704  | -0.018 |
| C      |     |    |   |        |         |        |
| HETATM | 126 | C  | 0 | 19.792 | -2.737  | -0.610 |
| C      |     |    |   |        |         |        |
| HETATM | 127 | C  | 0 | 19.314 | -1.685  | -1.414 |
| C      |     |    |   |        |         |        |
| HETATM | 128 | H  | 0 | 18.381 | -1.588  | -1.560 |
| H      |     |    |   |        |         |        |
| HETATM | 129 | C  | 0 | 20.179 | -0.810  | -1.980 |
| C      |     |    |   |        |         |        |
| HETATM | 130 | H  | 0 | 19.839 | -0.087  | -2.493 |
| H      |     |    |   |        |         |        |
| HETATM | 131 | C  | 0 | 21.599 | -0.953  | -1.820 |
| C      |     |    |   |        |         |        |
| HETATM | 132 | C  | 0 | 22.511 | -0.087  | -2.422 |
| C      |     |    |   |        |         |        |
| HETATM | 133 | H  | 0 | 22.194 | 0.624   | -2.968 |
| H      |     |    |   |        |         |        |
| HETATM | 134 | C  | 0 | 23.865 | -0.251  | -2.233 |
| C      |     |    |   |        |         |        |
| HETATM | 135 | H  | 0 | 24.477 | 0.357   | -2.632 |
| H      |     |    |   |        |         |        |
| HETATM | 136 | C  | 0 | 24.341 | -1.302  | -1.463 |
| C      |     |    |   |        |         |        |
| HETATM | 137 | H  | 0 | 25.276 | -1.417  | -1.353 |
| H      |     |    |   |        |         |        |
| HETATM | 138 | C  | 0 | 23.473 | -2.180  | -0.857 |
| C      |     |    |   |        |         |        |
| HETATM | 139 | H  | 0 | 23.809 | -2.896  | -0.331 |
| H      |     |    |   |        |         |        |
| HETATM | 140 | C  | 0 | 22.063 | -2.011  | -1.022 |
| C      |     |    |   |        |         |        |
| HETATM | 141 | C  | 0 | 21.150 | -2.885  | -0.416 |
| C      |     |    |   |        |         |        |
| HETATM | 142 | H  | 0 | 21.471 | -3.589  | 0.136  |
| H      |     |    |   |        |         |        |
| HETATM | 143 | Zn | 0 | 10.683 | -16.912 | -0.190 |
| Zn     |     |    |   |        |         |        |
| HETATM | 144 | S  | 0 | 6.226  | -17.613 | -1.053 |
| S      |     |    |   |        |         |        |
| HETATM | 145 | S  | 0 | 11.750 | -19.551 | -4.119 |
| S      |     |    |   |        |         |        |
| HETATM | 146 | N  | 0 | 9.666  | -15.666 | -1.691 |
| N      |     |    |   |        |         |        |
| HETATM | 147 | N  | 0 | 8.631  | -17.705 | -0.255 |
| N      |     |    |   |        |         |        |
| HETATM | 148 | N  | 0 | 8.005  | -18.723 | 0.416  |
| N      |     |    |   |        |         |        |
| HETATM | 149 | N  | 0 | 11.215 | -18.215 | -1.735 |
| N      |     |    |   |        |         |        |
| HETATM | 150 | C  | 0 | 10.205 | -14.692 | -2.409 |
| C      |     |    |   |        |         |        |

|        |     |   |   |        |         |        |
|--------|-----|---|---|--------|---------|--------|
| HETATM | 151 | H | 0 | 11.133 | -14.516 | -2.310 |
| H      |     |   |   |        |         |        |
| HETATM | 152 | C | 0 | 11.423 | -18.771 | -2.731 |
| C      |     |   |   |        |         |        |
| HETATM | 153 | C | 0 | 9.477  | -13.923 | -3.298 |
| C      |     |   |   |        |         |        |
| HETATM | 154 | H | 0 | 9.903  | -13.232 | -3.793 |
| H      |     |   |   |        |         |        |
| HETATM | 155 | C | 0 | 8.144  | -14.163 | -3.458 |
| C      |     |   |   |        |         |        |
| HETATM | 156 | H | 0 | 7.628  | -13.634 | -4.057 |
| H      |     |   |   |        |         |        |
| HETATM | 157 | C | 0 | 7.553  | -15.186 | -2.736 |
| C      |     |   |   |        |         |        |
| HETATM | 158 | H | 0 | 6.627  | -15.379 | -2.834 |
| H      |     |   |   |        |         |        |
| HETATM | 159 | C | 0 | 8.344  | -15.927 | -1.863 |
| C      |     |   |   |        |         |        |
| HETATM | 160 | C | 0 | 7.844  | -17.032 | -1.058 |
| C      |     |   |   |        |         |        |
| HETATM | 161 | C | 0 | 6.725  | -18.796 | 0.108  |
| C      |     |   |   |        |         |        |
| HETATM | 162 | C | 0 | 5.790  | -19.762 | 0.700  |
| C      |     |   |   |        |         |        |
| HETATM | 163 | C | 0 | 6.267  | -20.814 | 1.505  |
| C      |     |   |   |        |         |        |
| HETATM | 164 | H | 0 | 7.201  | -20.911 | 1.650  |
| H      |     |   |   |        |         |        |
| HETATM | 165 | C | 0 | 5.402  | -21.689 | 2.070  |
| C      |     |   |   |        |         |        |
| HETATM | 166 | H | 0 | 5.742  | -22.413 | 2.583  |
| H      |     |   |   |        |         |        |
| HETATM | 167 | C | 0 | 3.982  | -21.545 | 1.910  |
| C      |     |   |   |        |         |        |
| HETATM | 168 | C | 0 | 3.071  | -22.413 | 2.512  |
| C      |     |   |   |        |         |        |
| HETATM | 169 | H | 0 | 3.387  | -23.124 | 3.057  |
| H      |     |   |   |        |         |        |
| HETATM | 170 | C | 0 | 1.716  | -22.248 | 2.323  |
| C      |     |   |   |        |         |        |
| HETATM | 171 | H | 0 | 1.105  | -22.857 | 2.722  |
| H      |     |   |   |        |         |        |
| HETATM | 172 | C | 0 | 1.241  | -21.197 | 1.554  |
| C      |     |   |   |        |         |        |
| HETATM | 173 | H | 0 | 0.305  | -21.081 | 1.443  |
| H      |     |   |   |        |         |        |
| HETATM | 174 | C | 0 | 2.109  | -20.320 | 0.947  |
| C      |     |   |   |        |         |        |
| HETATM | 175 | H | 0 | 1.773  | -19.604 | 0.421  |
| H      |     |   |   |        |         |        |
| HETATM | 176 | C | 0 | 3.519  | -20.488 | 1.112  |
| C      |     |   |   |        |         |        |
| HETATM | 177 | C | 0 | 4.431  | -19.614 | 0.506  |
| C      |     |   |   |        |         |        |
| HETATM | 178 | H | 0 | 4.111  | -18.910 | -0.046 |
| H      |     |   |   |        |         |        |

|        |     |   |   |        |         |        |
|--------|-----|---|---|--------|---------|--------|
| HETATM | 179 | S | 0 | 15.141 | -16.210 | 0.672  |
| S      |     |   |   |        |         |        |
| HETATM | 180 | S | 0 | 9.616  | -14.273 | 3.738  |
| S      |     |   |   |        |         |        |
| HETATM | 181 | N | 0 | 11.700 | -18.157 | 1.310  |
| N      |     |   |   |        |         |        |
| HETATM | 182 | N | 0 | 12.736 | -16.118 | -0.127 |
| N      |     |   |   |        |         |        |
| HETATM | 183 | N | 0 | 13.361 | -15.101 | -0.797 |
| N      |     |   |   |        |         |        |
| HETATM | 184 | N | 0 | 10.152 | -15.608 | 1.354  |
| N      |     |   |   |        |         |        |
| HETATM | 185 | C | 0 | 11.161 | -19.131 | 2.028  |
| C      |     |   |   |        |         |        |
| HETATM | 186 | H | 0 | 10.233 | -19.308 | 1.929  |
| H      |     |   |   |        |         |        |
| HETATM | 187 | C | 0 | 9.943  | -15.053 | 2.349  |
| C      |     |   |   |        |         |        |
| HETATM | 188 | C | 0 | 11.889 | -19.901 | 2.917  |
| C      |     |   |   |        |         |        |
| HETATM | 189 | H | 0 | 11.464 | -20.591 | 3.411  |
| H      |     |   |   |        |         |        |
| HETATM | 190 | C | 0 | 13.222 | -19.661 | 3.078  |
| C      |     |   |   |        |         |        |
| HETATM | 191 | H | 0 | 13.738 | -20.189 | 3.676  |
| H      |     |   |   |        |         |        |
| HETATM | 192 | C | 0 | 13.813 | -18.636 | 2.354  |
| C      |     |   |   |        |         |        |
| HETATM | 193 | H | 0 | 14.739 | -18.444 | 2.453  |
| H      |     |   |   |        |         |        |
| HETATM | 194 | C | 0 | 13.022 | -17.896 | 1.482  |
| C      |     |   |   |        |         |        |
| HETATM | 195 | C | 0 | 13.522 | -16.791 | 0.676  |
| C      |     |   |   |        |         |        |
| HETATM | 196 | C | 0 | 14.640 | -15.027 | -0.489 |
| C      |     |   |   |        |         |        |
| HETATM | 197 | C | 0 | 15.576 | -14.061 | -1.082 |
| C      |     |   |   |        |         |        |
| HETATM | 198 | C | 0 | 15.099 | -13.009 | -1.885 |
| C      |     |   |   |        |         |        |
| HETATM | 199 | H | 0 | 14.165 | -12.912 | -2.030 |
| H      |     |   |   |        |         |        |
| HETATM | 200 | C | 0 | 15.964 | -12.134 | -2.451 |
| C      |     |   |   |        |         |        |
| HETATM | 201 | H | 0 | 15.624 | -11.410 | -2.965 |
| H      |     |   |   |        |         |        |
| HETATM | 202 | C | 0 | 17.384 | -12.277 | -2.292 |
| C      |     |   |   |        |         |        |
| HETATM | 203 | C | 0 | 18.295 | -11.410 | -2.893 |
| C      |     |   |   |        |         |        |
| HETATM | 204 | H | 0 | 17.979 | -10.699 | -3.438 |
| H      |     |   |   |        |         |        |
| HETATM | 205 | C | 0 | 19.651 | -11.575 | -2.705 |
| C      |     |   |   |        |         |        |
| HETATM | 206 | H | 0 | 20.261 | -10.967 | -3.104 |
| H      |     |   |   |        |         |        |

|        |     |    |   |        |         |        |
|--------|-----|----|---|--------|---------|--------|
| HETATM | 207 | C  | 0 | 20.125 | -12.626 | -1.935 |
| C      |     |    |   |        |         |        |
| HETATM | 208 | H  | 0 | 21.062 | -12.742 | -1.824 |
| H      |     |    |   |        |         |        |
| HETATM | 209 | C  | 0 | 19.257 | -13.503 | -1.329 |
| C      |     |    |   |        |         |        |
| HETATM | 210 | H  | 0 | 19.593 | -14.219 | -0.803 |
| H      |     |    |   |        |         |        |
| HETATM | 211 | C  | 0 | 17.847 | -13.335 | -1.493 |
| C      |     |    |   |        |         |        |
| HETATM | 212 | C  | 0 | 16.935 | -14.210 | -0.887 |
| C      |     |    |   |        |         |        |
| HETATM | 213 | H  | 0 | 17.255 | -14.913 | -0.336 |
| H      |     |    |   |        |         |        |
| HETATM | 214 | Zn | 0 | 11.664 | 8.530   | 0.612  |
| Zn     |     |    |   |        |         |        |
| HETATM | 215 | S  | 0 | 7.207  | 7.828   | -0.251 |
| S      |     |    |   |        |         |        |
| HETATM | 216 | S  | 0 | 12.731 | 5.891   | -3.316 |
| S      |     |    |   |        |         |        |
| HETATM | 217 | N  | 0 | 10.647 | 9.775   | -0.889 |
| N      |     |    |   |        |         |        |
| HETATM | 218 | N  | 0 | 9.612  | 7.737   | 0.547  |
| N      |     |    |   |        |         |        |
| HETATM | 219 | N  | 0 | 8.986  | 6.719   | 1.218  |
| N      |     |    |   |        |         |        |
| HETATM | 220 | N  | 0 | 12.196 | 7.226   | -0.934 |
| N      |     |    |   |        |         |        |
| HETATM | 221 | C  | 0 | 11.186 | 10.749  | -1.607 |
| C      |     |    |   |        |         |        |
| HETATM | 222 | H  | 0 | 12.115 | 10.926  | -1.507 |
| H      |     |    |   |        |         |        |
| HETATM | 223 | C  | 0 | 12.405 | 6.671   | -1.929 |
| C      |     |    |   |        |         |        |
| HETATM | 224 | C  | 0 | 10.460 | 11.518  | -2.496 |
| C      |     |    |   |        |         |        |
| HETATM | 225 | H  | 0 | 10.884 | 12.210  | -2.991 |
| H      |     |    |   |        |         |        |
| HETATM | 226 | C  | 0 | 9.125  | 11.279  | -2.656 |
| C      |     |    |   |        |         |        |
| HETATM | 227 | H  | 0 | 8.609  | 11.807  | -3.255 |
| H      |     |    |   |        |         |        |
| HETATM | 228 | C  | 0 | 8.534  | 10.255  | -1.934 |
| C      |     |    |   |        |         |        |
| HETATM | 229 | H  | 0 | 7.608  | 10.062  | -2.032 |
| H      |     |    |   |        |         |        |
| HETATM | 230 | C  | 0 | 9.326  | 9.515   | -1.061 |
| C      |     |    |   |        |         |        |
| HETATM | 231 | C  | 0 | 8.825  | 8.409   | -0.256 |
| C      |     |    |   |        |         |        |
| HETATM | 232 | C  | 0 | 7.707  | 6.646   | 0.910  |
| C      |     |    |   |        |         |        |
| HETATM | 233 | C  | 0 | 6.771  | 5.679   | 1.502  |
| C      |     |    |   |        |         |        |
| HETATM | 234 | C  | 0 | 7.248  | 4.627   | 2.306  |
| C      |     |    |   |        |         |        |

|        |     |   |   |        |        |       |
|--------|-----|---|---|--------|--------|-------|
| HETATM | 235 | H | 0 | 8.182  | 4.530  | 2.452 |
| H      |     |   |   |        |        |       |
| HETATM | 236 | C | 0 | 6.384  | 3.752  | 2.872 |
| C      |     |   |   |        |        |       |
| HETATM | 237 | H | 0 | 6.724  | 3.029  | 3.385 |
| H      |     |   |   |        |        |       |
| HETATM | 238 | C | 0 | 4.965  | 3.896  | 2.712 |
| C      |     |   |   |        |        |       |
| HETATM | 239 | C | 0 | 4.052  | 3.029  | 3.314 |
| C      |     |   |   |        |        |       |
| HETATM | 240 | H | 0 | 4.368  | 2.318  | 3.860 |
| H      |     |   |   |        |        |       |
| HETATM | 241 | C | 0 | 2.697  | 3.194  | 3.126 |
| C      |     |   |   |        |        |       |
| HETATM | 242 | H | 0 | 2.086  | 2.585  | 3.524 |
| H      |     |   |   |        |        |       |
| HETATM | 243 | C | 0 | 2.222  | 4.244  | 2.355 |
| C      |     |   |   |        |        |       |
| HETATM | 244 | H | 0 | 1.286  | 4.359  | 2.245 |
| H      |     |   |   |        |        |       |
| HETATM | 245 | C | 0 | 3.090  | 5.121  | 1.749 |
| C      |     |   |   |        |        |       |
| HETATM | 246 | H | 0 | 2.755  | 5.837  | 1.223 |
| H      |     |   |   |        |        |       |
| HETATM | 247 | C | 0 | 4.500  | 4.953  | 1.914 |
| C      |     |   |   |        |        |       |
| HETATM | 248 | C | 0 | 5.413  | 5.827  | 1.308 |
| C      |     |   |   |        |        |       |
| HETATM | 249 | H | 0 | 5.093  | 6.532  | 0.756 |
| H      |     |   |   |        |        |       |
| HETATM | 250 | S | 0 | 16.122 | 9.232  | 1.474 |
| S      |     |   |   |        |        |       |
| HETATM | 251 | S | 0 | 10.598 | 11.168 | 4.540 |
| S      |     |   |   |        |        |       |
| HETATM | 252 | N | 0 | 12.682 | 7.285  | 2.112 |
| N      |     |   |   |        |        |       |
| HETATM | 253 | N | 0 | 13.717 | 9.323  | 0.675 |
| N      |     |   |   |        |        |       |
| HETATM | 254 | N | 0 | 14.343 | 10.341 | 0.005 |
| N      |     |   |   |        |        |       |
| HETATM | 255 | N | 0 | 11.133 | 9.834  | 2.156 |
| N      |     |   |   |        |        |       |
| HETATM | 256 | C | 0 | 12.143 | 6.311  | 2.830 |
| C      |     |   |   |        |        |       |
| HETATM | 257 | H | 0 | 11.214 | 6.134  | 2.731 |
| H      |     |   |   |        |        |       |
| HETATM | 258 | C | 0 | 10.924 | 10.389 | 3.151 |
| C      |     |   |   |        |        |       |
| HETATM | 259 | C | 0 | 12.870 | 5.541  | 3.719 |
| C      |     |   |   |        |        |       |
| HETATM | 260 | H | 0 | 12.445 | 4.851  | 4.213 |
| H      |     |   |   |        |        |       |
| HETATM | 261 | C | 0 | 14.205 | 5.780  | 3.879 |
| C      |     |   |   |        |        |       |
| HETATM | 262 | H | 0 | 14.720 | 5.253  | 4.478 |
| H      |     |   |   |        |        |       |

|        |     |    |   |        |        |        |
|--------|-----|----|---|--------|--------|--------|
| HETATM | 263 | C  | 0 | 14.795 | 6.805  | 3.156  |
| C      |     |    |   |        |        |        |
| HETATM | 264 | H  | 0 | 15.721 | 6.998  | 3.255  |
| H      |     |    |   |        |        |        |
| HETATM | 265 | C  | 0 | 14.003 | 7.545  | 2.284  |
| C      |     |    |   |        |        |        |
| HETATM | 266 | C  | 0 | 14.504 | 8.651  | 1.479  |
| C      |     |    |   |        |        |        |
| HETATM | 267 | C  | 0 | 15.622 | 10.414 | 0.313  |
| C      |     |    |   |        |        |        |
| HETATM | 268 | C  | 0 | 16.557 | 11.381 | -0.280 |
| C      |     |    |   |        |        |        |
| HETATM | 269 | C  | 0 | 16.081 | 12.433 | -1.083 |
| C      |     |    |   |        |        |        |
| HETATM | 270 | H  | 0 | 15.146 | 12.530 | -1.228 |
| H      |     |    |   |        |        |        |
| HETATM | 271 | C  | 0 | 16.946 | 13.308 | -1.649 |
| C      |     |    |   |        |        |        |
| HETATM | 272 | H  | 0 | 16.605 | 14.031 | -2.163 |
| H      |     |    |   |        |        |        |
| HETATM | 273 | C  | 0 | 18.365 | 13.164 | -1.490 |
| C      |     |    |   |        |        |        |
| HETATM | 274 | C  | 0 | 19.277 | 14.031 | -2.091 |
| C      |     |    |   |        |        |        |
| HETATM | 275 | H  | 0 | 18.961 | 14.742 | -2.636 |
| H      |     |    |   |        |        |        |
| HETATM | 276 | C  | 0 | 20.632 | 13.867 | -1.903 |
| C      |     |    |   |        |        |        |
| HETATM | 277 | H  | 0 | 21.243 | 14.475 | -2.302 |
| H      |     |    |   |        |        |        |
| HETATM | 278 | C  | 0 | 21.107 | 12.816 | -1.133 |
| C      |     |    |   |        |        |        |
| HETATM | 279 | H  | 0 | 22.043 | 12.700 | -1.023 |
| H      |     |    |   |        |        |        |
| HETATM | 280 | C  | 0 | 20.239 | 11.938 | -0.527 |
| C      |     |    |   |        |        |        |
| HETATM | 281 | H  | 0 | 20.574 | 11.222 | -0.001 |
| H      |     |    |   |        |        |        |
| HETATM | 282 | C  | 0 | 18.829 | 12.107 | -0.691 |
| C      |     |    |   |        |        |        |
| HETATM | 283 | C  | 0 | 17.917 | 11.232 | -0.086 |
| C      |     |    |   |        |        |        |
| HETATM | 284 | H  | 0 | 18.236 | 10.528 | 0.466  |
| H      |     |    |   |        |        |        |
| HETATM | 285 | Zn | 0 | 7.449  | -2.794 | 0.140  |
| Zn     |     |    |   |        |        |        |
| HETATM | 286 | S  | 0 | 2.991  | -3.496 | -0.722 |
| S      |     |    |   |        |        |        |
| HETATM | 287 | S  | 0 | 8.517  | -5.433 | -3.788 |
| S      |     |    |   |        |        |        |
| HETATM | 288 | N  | 0 | 6.433  | -1.549 | -1.360 |
| N      |     |    |   |        |        |        |
| HETATM | 289 | N  | 0 | 5.396  | -3.587 | 0.077  |
| N      |     |    |   |        |        |        |
| HETATM | 290 | N  | 0 | 4.770  | -4.605 | 0.747  |
| N      |     |    |   |        |        |        |

|        |     |   |   |        |        |        |
|--------|-----|---|---|--------|--------|--------|
| HETATM | 291 | N | 0 | 7.981  | -4.098 | -1.404 |
| N      |     |   |   |        |        |        |
| HETATM | 292 | C | 0 | 6.971  | -0.575 | -2.078 |
| C      |     |   |   |        |        |        |
| HETATM | 293 | H | 0 | 7.899  | -0.398 | -1.979 |
| H      |     |   |   |        |        |        |
| HETATM | 294 | C | 0 | 8.190  | -4.653 | -2.400 |
| C      |     |   |   |        |        |        |
| HETATM | 295 | C | 0 | 6.244  | 0.195  | -2.967 |
| C      |     |   |   |        |        |        |
| HETATM | 296 | H | 0 | 6.669  | 0.886  | -3.461 |
| H      |     |   |   |        |        |        |
| HETATM | 297 | C | 0 | 4.910  | -0.045 | -3.128 |
| C      |     |   |   |        |        |        |
| HETATM | 298 | H | 0 | 4.393  | 0.483  | -3.726 |
| H      |     |   |   |        |        |        |
| HETATM | 299 | C | 0 | 4.319  | -1.069 | -2.404 |
| C      |     |   |   |        |        |        |
| HETATM | 300 | H | 0 | 3.394  | -1.262 | -2.504 |
| H      |     |   |   |        |        |        |
| HETATM | 301 | C | 0 | 5.110  | -1.809 | -1.532 |
| C      |     |   |   |        |        |        |
| HETATM | 302 | C | 0 | 4.609  | -2.915 | -0.727 |
| C      |     |   |   |        |        |        |
| HETATM | 303 | C | 0 | 3.492  | -4.679 | 0.439  |
| C      |     |   |   |        |        |        |
| HETATM | 304 | C | 0 | 2.556  | -5.644 | 1.032  |
| C      |     |   |   |        |        |        |
| HETATM | 305 | C | 0 | 3.033  | -6.697 | 1.835  |
| C      |     |   |   |        |        |        |
| HETATM | 306 | H | 0 | 3.967  | -6.794 | 1.980  |
| H      |     |   |   |        |        |        |
| HETATM | 307 | C | 0 | 2.168  | -7.572 | 2.400  |
| C      |     |   |   |        |        |        |
| HETATM | 308 | H | 0 | 2.508  | -8.295 | 2.915  |
| H      |     |   |   |        |        |        |
| HETATM | 309 | C | 0 | 0.749  | -7.428 | 2.242  |
| C      |     |   |   |        |        |        |
| HETATM | 310 | C | 0 | -0.163 | -8.295 | 2.843  |
| C      |     |   |   |        |        |        |
| HETATM | 311 | H | 0 | 0.154  | -9.006 | 3.388  |
| H      |     |   |   |        |        |        |
| HETATM | 312 | C | 0 | -1.518 | -8.130 | 2.654  |
| C      |     |   |   |        |        |        |
| HETATM | 313 | H | 0 | -2.128 | -8.739 | 3.054  |
| H      |     |   |   |        |        |        |
| HETATM | 314 | C | 0 | -1.992 | -7.079 | 1.885  |
| C      |     |   |   |        |        |        |
| HETATM | 315 | H | 0 | -2.929 | -6.965 | 1.774  |
| H      |     |   |   |        |        |        |
| HETATM | 316 | C | 0 | -1.125 | -6.202 | 1.279  |
| C      |     |   |   |        |        |        |
| HETATM | 317 | H | 0 | -1.462 | -5.486 | 0.753  |
| H      |     |   |   |        |        |        |
| HETATM | 318 | C | 0 | 0.286  | -6.371 | 1.443  |
| C      |     |   |   |        |        |        |

|        |     |   |   |        |        |        |
|--------|-----|---|---|--------|--------|--------|
| HETATM | 319 | C | 0 | 1.197  | -5.497 | 0.837  |
| C      |     |   |   |        |        |        |
| HETATM | 320 | H | 0 | 0.877  | -4.792 | 0.286  |
| H      |     |   |   |        |        |        |
| HETATM | 321 | S | 0 | 11.906 | -2.092 | 1.003  |
| S      |     |   |   |        |        |        |
| HETATM | 322 | S | 0 | 6.382  | -0.155 | 4.068  |
| S      |     |   |   |        |        |        |
| HETATM | 323 | N | 0 | 8.466  | -4.039 | 1.641  |
| N      |     |   |   |        |        |        |
| HETATM | 324 | N | 0 | 9.502  | -2.001 | 0.204  |
| N      |     |   |   |        |        |        |
| HETATM | 325 | N | 0 | 10.128 | -0.984 | -0.466 |
| N      |     |   |   |        |        |        |
| HETATM | 326 | N | 0 | 6.917  | -1.490 | 1.685  |
| N      |     |   |   |        |        |        |
| HETATM | 327 | C | 0 | 7.927  | -5.013 | 2.359  |
| C      |     |   |   |        |        |        |
| HETATM | 328 | H | 0 | 6.999  | -5.190 | 2.259  |
| H      |     |   |   |        |        |        |
| HETATM | 329 | C | 0 | 6.708  | -0.935 | 2.681  |
| C      |     |   |   |        |        |        |
| HETATM | 330 | C | 0 | 8.654  | -5.783 | 3.248  |
| C      |     |   |   |        |        |        |
| HETATM | 331 | H | 0 | 8.229  | -6.473 | 3.743  |
| H      |     |   |   |        |        |        |
| HETATM | 332 | C | 0 | 9.989  | -5.544 | 3.408  |
| C      |     |   |   |        |        |        |
| HETATM | 333 | H | 0 | 10.504 | -6.071 | 4.007  |
| H      |     |   |   |        |        |        |
| HETATM | 334 | C | 0 | 10.580 | -4.519 | 2.686  |
| C      |     |   |   |        |        |        |
| HETATM | 335 | H | 0 | 11.505 | -4.326 | 2.783  |
| H      |     |   |   |        |        |        |
| HETATM | 336 | C | 0 | 9.789  | -3.779 | 1.813  |
| C      |     |   |   |        |        |        |
| HETATM | 337 | C | 0 | 10.289 | -2.673 | 1.008  |
| C      |     |   |   |        |        |        |
| HETATM | 338 | C | 0 | 11.406 | -0.910 | -0.158 |
| C      |     |   |   |        |        |        |
| HETATM | 339 | C | 0 | 12.343 | 0.057  | -0.750 |
| C      |     |   |   |        |        |        |
| HETATM | 340 | C | 0 | 11.865 | 1.109  | -1.555 |
| C      |     |   |   |        |        |        |
| HETATM | 341 | H | 0 | 10.932 | 1.205  | -1.700 |
| H      |     |   |   |        |        |        |
| HETATM | 342 | C | 0 | 12.730 | 1.984  | -2.120 |
| C      |     |   |   |        |        |        |
| HETATM | 343 | H | 0 | 12.390 | 2.707  | -2.633 |
| H      |     |   |   |        |        |        |
| HETATM | 344 | C | 0 | 14.150 | 1.840  | -1.960 |
| C      |     |   |   |        |        |        |
| HETATM | 345 | C | 0 | 15.062 | 2.707  | -2.562 |
| C      |     |   |   |        |        |        |
| HETATM | 346 | H | 0 | 14.745 | 3.418  | -3.108 |
| H      |     |   |   |        |        |        |



|        |     |    |   |        |         |        |
|--------|-----|----|---|--------|---------|--------|
| HETATM | 347 | C  | 0 | 16.416 | 2.543   | -2.374 |
| C      |     |    |   |        |         |        |
| HETATM | 348 | H  | 0 | 17.027 | 3.151   | -2.773 |
| H      |     |    |   |        |         |        |
| HETATM | 349 | C  | 0 | 16.891 | 1.492   | -1.604 |
| C      |     |    |   |        |         |        |
| HETATM | 350 | H  | 0 | 17.827 | 1.376   | -1.493 |
| H      |     |    |   |        |         |        |
| HETATM | 351 | C  | 0 | 16.024 | 0.614   | -0.998 |
| C      |     |    |   |        |         |        |
| HETATM | 352 | H  | 0 | 16.360 | -0.102  | -0.471 |
| H      |     |    |   |        |         |        |
| HETATM | 353 | C  | 0 | 14.613 | 0.783   | -1.162 |
| C      |     |    |   |        |         |        |
| HETATM | 354 | C  | 0 | 13.701 | -0.092  | -0.556 |
| C      |     |    |   |        |         |        |
| HETATM | 355 | H  | 0 | 14.022 | -0.795  | -0.004 |
| H      |     |    |   |        |         |        |
| HETATM | 356 | Zn | 0 | 3.234  | -14.118 | -0.331 |
| Zn     |     |    |   |        |         |        |
| HETATM | 357 | S  | 0 | -1.224 | -14.819 | -1.194 |
| S      |     |    |   |        |         |        |
| HETATM | 358 | S  | 0 | 4.301  | -16.757 | -4.259 |
| S      |     |    |   |        |         |        |
| HETATM | 359 | N  | 0 | 2.217  | -12.872 | -1.831 |
| N      |     |    |   |        |         |        |
| HETATM | 360 | N  | 0 | 1.182  | -14.911 | -0.395 |
| N      |     |    |   |        |         |        |
| HETATM | 361 | N  | 0 | 0.555  | -15.929 | 0.275  |
| N      |     |    |   |        |         |        |
| HETATM | 362 | N  | 0 | 3.765  | -15.421 | -1.876 |
| N      |     |    |   |        |         |        |
| HETATM | 363 | C  | 0 | 2.756  | -11.898 | -2.550 |
| C      |     |    |   |        |         |        |
| HETATM | 364 | H  | 0 | 3.684  | -11.722 | -2.450 |
| H      |     |    |   |        |         |        |
| HETATM | 365 | C  | 0 | 3.974  | -15.977 | -2.871 |
| C      |     |    |   |        |         |        |
| HETATM | 366 | C  | 0 | 2.028  | -11.129 | -3.438 |
| C      |     |    |   |        |         |        |
| HETATM | 367 | H  | 0 | 2.454  | -10.438 | -3.933 |
| H      |     |    |   |        |         |        |
| HETATM | 368 | C  | 0 | 0.694  | -11.368 | -3.599 |
| C      |     |    |   |        |         |        |
| HETATM | 369 | H  | 0 | 0.179  | -10.840 | -4.197 |
| H      |     |    |   |        |         |        |
| HETATM | 370 | C  | 0 | 0.103  | -12.392 | -2.876 |
| C      |     |    |   |        |         |        |
| HETATM | 371 | H  | 0 | -0.822 | -12.585 | -2.974 |
| H      |     |    |   |        |         |        |
| HETATM | 372 | C  | 0 | 0.895  | -13.133 | -2.003 |
| C      |     |    |   |        |         |        |
| HETATM | 373 | C  | 0 | 0.394  | -14.238 | -1.198 |
| C      |     |    |   |        |         |        |
| HETATM | 374 | C  | 0 | -0.724 | -16.002 | -0.033 |
| C      |     |    |   |        |         |        |

|        |     |   |   |        |         |        |
|--------|-----|---|---|--------|---------|--------|
| HETATM | 375 | C | 0 | -1.659 | -16.968 | 0.560  |
| C      |     |   |   |        |         |        |
| HETATM | 376 | C | 0 | -1.182 | -18.020 | 1.364  |
| C      |     |   |   |        |         |        |
| HETATM | 377 | H | 0 | -0.248 | -18.117 | 1.510  |
| H      |     |   |   |        |         |        |
| HETATM | 378 | C | 0 | -2.047 | -18.895 | 1.930  |
| C      |     |   |   |        |         |        |
| HETATM | 379 | H | 0 | -1.707 | -19.619 | 2.443  |
| H      |     |   |   |        |         |        |
| HETATM | 380 | C | 0 | -3.467 | -18.751 | 1.770  |
| C      |     |   |   |        |         |        |
| HETATM | 381 | C | 0 | -4.379 | -19.619 | 2.371  |
| C      |     |   |   |        |         |        |
| HETATM | 382 | H | 0 | -4.062 | -20.330 | 2.917  |
| H      |     |   |   |        |         |        |
| HETATM | 383 | C | 0 | -5.733 | -19.454 | 2.183  |
| C      |     |   |   |        |         |        |
| HETATM | 384 | H | 0 | -6.344 | -20.063 | 2.582  |
| H      |     |   |   |        |         |        |
| HETATM | 385 | C | 0 | -6.208 | -18.403 | 1.413  |
| C      |     |   |   |        |         |        |
| HETATM | 386 | H | 0 | -7.144 | -18.288 | 1.303  |
| H      |     |   |   |        |         |        |
| HETATM | 387 | C | 0 | -5.340 | -17.526 | 0.807  |
| C      |     |   |   |        |         |        |
| HETATM | 388 | H | 0 | -5.676 | -16.811 | 0.281  |
| H      |     |   |   |        |         |        |
| HETATM | 389 | C | 0 | -3.930 | -17.694 | 0.971  |
| C      |     |   |   |        |         |        |
| HETATM | 390 | C | 0 | -3.018 | -16.820 | 0.366  |
| C      |     |   |   |        |         |        |
| HETATM | 391 | H | 0 | -3.338 | -16.116 | -0.186 |
| H      |     |   |   |        |         |        |
| HETATM | 392 | S | 0 | 7.692  | -13.416 | 0.532  |
| S      |     |   |   |        |         |        |
| HETATM | 393 | S | 0 | 2.167  | -11.479 | 3.598  |
| S      |     |   |   |        |         |        |
| HETATM | 394 | N | 0 | 4.251  | -15.363 | 1.170  |
| N      |     |   |   |        |         |        |
| HETATM | 395 | N | 0 | 5.286  | -13.324 | -0.267 |
| N      |     |   |   |        |         |        |
| HETATM | 396 | N | 0 | 5.912  | -12.307 | -0.938 |
| N      |     |   |   |        |         |        |
| HETATM | 397 | N | 0 | 2.703  | -12.814 | 1.214  |
| N      |     |   |   |        |         |        |
| HETATM | 398 | C | 0 | 3.711  | -16.337 | 1.887  |
| C      |     |   |   |        |         |        |
| HETATM | 399 | H | 0 | 2.784  | -16.514 | 1.789  |
| H      |     |   |   |        |         |        |
| HETATM | 400 | C | 0 | 2.493  | -12.258 | 2.209  |
| C      |     |   |   |        |         |        |
| HETATM | 401 | C | 0 | 4.439  | -17.107 | 2.777  |
| C      |     |   |   |        |         |        |
| HETATM | 402 | H | 0 | 4.015  | -17.797 | 3.271  |
| H      |     |   |   |        |         |        |

|        |     |    |   |        |         |        |
|--------|-----|----|---|--------|---------|--------|
| HETATM | 403 | C  | 0 | 5.773  | -16.867 | 2.937  |
| C      |     |    |   |        |         |        |
| HETATM | 404 | H  | 0 | 6.289  | -17.395 | 3.535  |
| H      |     |    |   |        |         |        |
| HETATM | 405 | C  | 0 | 6.364  | -15.842 | 2.214  |
| C      |     |    |   |        |         |        |
| HETATM | 406 | H  | 0 | 7.290  | -15.650 | 2.313  |
| H      |     |    |   |        |         |        |
| HETATM | 407 | C  | 0 | 5.573  | -15.102 | 1.342  |
| C      |     |    |   |        |         |        |
| HETATM | 408 | C  | 0 | 6.073  | -13.997 | 0.536  |
| C      |     |    |   |        |         |        |
| HETATM | 409 | C  | 0 | 7.191  | -12.234 | -0.630 |
| C      |     |    |   |        |         |        |
| HETATM | 410 | C  | 0 | 8.127  | -11.267 | -1.222 |
| C      |     |    |   |        |         |        |
| HETATM | 411 | C  | 0 | 7.650  | -10.215 | -2.025 |
| C      |     |    |   |        |         |        |
| HETATM | 412 | H  | 0 | 6.716  | -10.118 | -2.171 |
| H      |     |    |   |        |         |        |
| HETATM | 413 | C  | 0 | 8.514  | -9.340  | -2.592 |
| C      |     |    |   |        |         |        |
| HETATM | 414 | H  | 0 | 8.175  | -8.616  | -3.105 |
| H      |     |    |   |        |         |        |
| HETATM | 415 | C  | 0 | 9.934  | -9.483  | -2.432 |
| C      |     |    |   |        |         |        |
| HETATM | 416 | C  | 0 | 10.846 | -8.616  | -3.033 |
| C      |     |    |   |        |         |        |
| HETATM | 417 | H  | 0 | 10.530 | -7.905  | -3.578 |
| H      |     |    |   |        |         |        |
| HETATM | 418 | C  | 0 | 12.201 | -8.781  | -2.845 |
| C      |     |    |   |        |         |        |
| HETATM | 419 | H  | 0 | 12.812 | -8.173  | -3.244 |
| H      |     |    |   |        |         |        |
| HETATM | 420 | C  | 0 | 12.676 | -9.832  | -2.075 |
| C      |     |    |   |        |         |        |
| HETATM | 421 | H  | 0 | 13.612 | -9.948  | -1.964 |
| H      |     |    |   |        |         |        |
| HETATM | 422 | C  | 0 | 11.808 | -10.710 | -1.469 |
| C      |     |    |   |        |         |        |
| HETATM | 423 | H  | 0 | 12.144 | -11.425 | -0.943 |
| H      |     |    |   |        |         |        |
| HETATM | 424 | C  | 0 | 10.398 | -10.541 | -1.633 |
| C      |     |    |   |        |         |        |
| HETATM | 425 | C  | 0 | 9.485  | -11.415 | -1.027 |
| C      |     |    |   |        |         |        |
| HETATM | 426 | H  | 0 | 9.806  | -12.119 | -0.476 |
| H      |     |    |   |        |         |        |
| HETATM | 427 | Zn | 0 | 4.215  | 11.324  | 0.471  |
| Zn     |     |    |   |        |         |        |
| HETATM | 428 | S  | 0 | -0.242 | 10.622  | -0.392 |
| S      |     |    |   |        |         |        |
| HETATM | 429 | S  | 0 | 5.282  | 8.685   | -3.457 |
| S      |     |    |   |        |         |        |
| HETATM | 430 | N  | 0 | 3.198  | 12.569  | -1.029 |
| N      |     |    |   |        |         |        |

|        |     |   |   |        |        |        |
|--------|-----|---|---|--------|--------|--------|
| HETATM | 431 | N | 0 | 2.163  | 10.531 | 0.407  |
| N      |     |   |   |        |        |        |
| HETATM | 432 | N | 0 | 1.537  | 9.513  | 1.078  |
| N      |     |   |   |        |        |        |
| HETATM | 433 | N | 0 | 4.747  | 10.020 | -1.074 |
| N      |     |   |   |        |        |        |
| HETATM | 434 | C | 0 | 3.737  | 13.543 | -1.748 |
| C      |     |   |   |        |        |        |
| HETATM | 435 | H | 0 | 4.666  | 13.719 | -1.648 |
| H      |     |   |   |        |        |        |
| HETATM | 436 | C | 0 | 4.956  | 9.464  | -2.069 |
| C      |     |   |   |        |        |        |
| HETATM | 437 | C | 0 | 3.010  | 14.313 | -2.636 |
| C      |     |   |   |        |        |        |
| HETATM | 438 | H | 0 | 3.435  | 15.004 | -3.131 |
| H      |     |   |   |        |        |        |
| HETATM | 439 | C | 0 | 1.675  | 14.073 | -2.797 |
| C      |     |   |   |        |        |        |
| HETATM | 440 | H | 0 | 1.160  | 14.600 | -3.395 |
| H      |     |   |   |        |        |        |
| HETATM | 441 | C | 0 | 1.085  | 13.049 | -2.074 |
| C      |     |   |   |        |        |        |
| HETATM | 442 | H | 0 | 0.159  | 12.856 | -2.172 |
| H      |     |   |   |        |        |        |
| HETATM | 443 | C | 0 | 1.876  | 12.309 | -1.201 |
| C      |     |   |   |        |        |        |
| HETATM | 444 | C | 0 | 1.376  | 11.203 | -0.396 |
| C      |     |   |   |        |        |        |
| HETATM | 445 | C | 0 | 0.258  | 9.439  | 0.769  |
| C      |     |   |   |        |        |        |
| HETATM | 446 | C | 0 | -0.678 | 8.473  | 1.362  |
| C      |     |   |   |        |        |        |
| HETATM | 447 | C | 0 | -0.201 | 7.421  | 2.165  |
| C      |     |   |   |        |        |        |
| HETATM | 448 | H | 0 | 0.733  | 7.324  | 2.311  |
| H      |     |   |   |        |        |        |
| HETATM | 449 | C | 0 | -1.066 | 6.546  | 2.731  |
| C      |     |   |   |        |        |        |
| HETATM | 450 | H | 0 | -0.725 | 5.823  | 3.245  |
| H      |     |   |   |        |        |        |
| HETATM | 451 | C | 0 | -2.485 | 6.690  | 2.572  |
| C      |     |   |   |        |        |        |
| HETATM | 452 | C | 0 | -3.397 | 5.822  | 3.173  |
| C      |     |   |   |        |        |        |
| HETATM | 453 | H | 0 | -3.081 | 5.112  | 3.719  |
| H      |     |   |   |        |        |        |
| HETATM | 454 | C | 0 | -4.752 | 5.988  | 2.985  |
| C      |     |   |   |        |        |        |
| HETATM | 455 | H | 0 | -5.363 | 5.379  | 3.384  |
| H      |     |   |   |        |        |        |
| HETATM | 456 | C | 0 | -5.227 | 7.038  | 2.215  |
| C      |     |   |   |        |        |        |
| HETATM | 457 | H | 0 | -6.163 | 7.153  | 2.105  |
| H      |     |   |   |        |        |        |
| HETATM | 458 | C | 0 | -4.359 | 7.915  | 1.609  |
| C      |     |   |   |        |        |        |

|        |     |   |   |        |        |        |
|--------|-----|---|---|--------|--------|--------|
| HETATM | 459 | H | 0 | -4.695 | 8.631  | 1.083  |
| H      |     |   |   |        |        |        |
| HETATM | 460 | C | 0 | -2.949 | 7.747  | 1.773  |
| C      |     |   |   |        |        |        |
| HETATM | 461 | C | 0 | -2.037 | 8.621  | 1.168  |
| C      |     |   |   |        |        |        |
| HETATM | 462 | H | 0 | -2.356 | 9.326  | 0.616  |
| H      |     |   |   |        |        |        |
| HETATM | 463 | S | 0 | 8.673  | 12.026 | 1.334  |
| S      |     |   |   |        |        |        |
| HETATM | 464 | S | 0 | 3.149  | 13.962 | 4.400  |
| S      |     |   |   |        |        |        |
| HETATM | 465 | N | 0 | 5.233  | 10.079 | 1.972  |
| N      |     |   |   |        |        |        |
| HETATM | 466 | N | 0 | 6.268  | 12.116 | 0.535  |
| N      |     |   |   |        |        |        |
| HETATM | 467 | N | 0 | 6.894  | 13.134 | -0.136 |
| N      |     |   |   |        |        |        |
| HETATM | 468 | N | 0 | 3.684  | 12.628 | 2.016  |
| N      |     |   |   |        |        |        |
| HETATM | 469 | C | 0 | 4.694  | 9.105  | 2.690  |
| C      |     |   |   |        |        |        |
| HETATM | 470 | H | 0 | 3.765  | 8.928  | 2.591  |
| H      |     |   |   |        |        |        |
| HETATM | 471 | C | 0 | 3.475  | 13.183 | 3.011  |
| C      |     |   |   |        |        |        |
| HETATM | 472 | C | 0 | 5.420  | 8.335  | 3.579  |
| C      |     |   |   |        |        |        |
| HETATM | 473 | H | 0 | 4.996  | 7.645  | 4.073  |
| H      |     |   |   |        |        |        |
| HETATM | 474 | C | 0 | 6.755  | 8.574  | 3.739  |
| C      |     |   |   |        |        |        |
| HETATM | 475 | H | 0 | 7.271  | 8.047  | 4.337  |
| H      |     |   |   |        |        |        |
| HETATM | 476 | C | 0 | 7.346  | 9.598  | 3.016  |
| C      |     |   |   |        |        |        |
| HETATM | 477 | H | 0 | 8.272  | 9.791  | 3.115  |
| H      |     |   |   |        |        |        |
| HETATM | 478 | C | 0 | 6.554  | 10.338 | 2.144  |
| C      |     |   |   |        |        |        |
| HETATM | 479 | C | 0 | 7.055  | 11.445 | 1.338  |
| C      |     |   |   |        |        |        |
| HETATM | 480 | C | 0 | 8.173  | 13.208 | 0.173  |
| C      |     |   |   |        |        |        |
| HETATM | 481 | C | 0 | 9.108  | 14.175 | -0.420 |
| C      |     |   |   |        |        |        |
| HETATM | 482 | C | 0 | 8.632  | 15.227 | -1.223 |
| C      |     |   |   |        |        |        |
| HETATM | 483 | H | 0 | 7.697  | 15.323 | -1.368 |
| H      |     |   |   |        |        |        |
| HETATM | 484 | C | 0 | 9.497  | 16.101 | -1.789 |
| C      |     |   |   |        |        |        |
| HETATM | 485 | H | 0 | 9.156  | 16.825 | -2.303 |
| H      |     |   |   |        |        |        |
| HETATM | 486 | C | 0 | 10.916 | 15.958 | -1.630 |
| C      |     |   |   |        |        |        |

|        |     |    |   |        |        |        |
|--------|-----|----|---|--------|--------|--------|
| HETATM | 487 | C  | 0 | 11.827 | 16.825 | -2.231 |
| C      |     |    |   |        |        |        |
| HETATM | 488 | H  | 0 | 11.511 | 17.536 | -2.776 |
| H      |     |    |   |        |        |        |
| HETATM | 489 | C  | 0 | 13.183 | 16.660 | -2.043 |
| C      |     |    |   |        |        |        |
| HETATM | 490 | H  | 0 | 13.793 | 17.269 | -2.442 |
| H      |     |    |   |        |        |        |
| HETATM | 491 | C  | 0 | 13.658 | 15.609 | -1.273 |
| C      |     |    |   |        |        |        |
| HETATM | 492 | H  | 0 | 14.594 | 15.494 | -1.163 |
| H      |     |    |   |        |        |        |
| HETATM | 493 | C  | 0 | 12.790 | 14.732 | -0.667 |
| C      |     |    |   |        |        |        |
| HETATM | 494 | H  | 0 | 13.125 | 14.016 | -0.141 |
| H      |     |    |   |        |        |        |
| HETATM | 495 | C  | 0 | 11.380 | 14.901 | -0.831 |
| C      |     |    |   |        |        |        |
| HETATM | 496 | C  | 0 | 10.468 | 14.026 | -0.226 |
| C      |     |    |   |        |        |        |
| HETATM | 497 | H  | 0 | 10.787 | 13.322 | 0.326  |
| H      |     |    |   |        |        |        |
| HETATM | 498 | Fe | 0 | 0.001  | 0.000  | -0.001 |
| Fe     |     |    |   |        |        |        |
| HETATM | 499 | S  | 0 | -4.355 | -0.645 | -0.945 |
| S      |     |    |   |        |        |        |
| HETATM | 500 | S  | 0 | 1.025  | -2.790 | -3.821 |
| S      |     |    |   |        |        |        |
| HETATM | 501 | N  | 0 | -0.795 | 1.289  | -1.344 |
| N      |     |    |   |        |        |        |
| HETATM | 502 | N  | 0 | -1.889 | -0.752 | -0.067 |
| N      |     |    |   |        |        |        |
| HETATM | 503 | N  | 0 | -2.543 | -1.803 | 0.594  |
| N      |     |    |   |        |        |        |
| HETATM | 504 | N  | 0 | 0.490  | -1.165 | -1.485 |
| N      |     |    |   |        |        |        |
| HETATM | 505 | C  | 0 | -0.157 | 2.306  | -1.976 |
| C      |     |    |   |        |        |        |
| HETATM | 506 | H  | 0 | 0.886  | 2.452  | -1.705 |
| H      |     |    |   |        |        |        |
| HETATM | 507 | C  | 0 | 0.693  | -1.830 | -2.448 |
| C      |     |    |   |        |        |        |
| HETATM | 508 | C  | 0 | -0.813 | 3.119  | -2.931 |
| C      |     |    |   |        |        |        |
| HETATM | 509 | H  | 0 | -0.262 | 3.925  | -3.414 |
| H      |     |    |   |        |        |        |
| HETATM | 510 | C  | 0 | -2.169 | 2.872  | -3.245 |
| C      |     |    |   |        |        |        |
| HETATM | 511 | H  | 0 | -2.695 | 3.489  | -3.974 |
| H      |     |    |   |        |        |        |
| HETATM | 512 | C  | 0 | -2.838 | 1.809  | -2.595 |
| C      |     |    |   |        |        |        |
| HETATM | 513 | H  | 0 | -3.877 | 1.568  | -2.826 |
| H      |     |    |   |        |        |        |
| HETATM | 514 | C  | 0 | -2.109 | 1.051  | -1.653 |
| C      |     |    |   |        |        |        |

|        |     |   |   |         |        |        |
|--------|-----|---|---|---------|--------|--------|
| HETATM | 515 | C | 0 | -2.674  | -0.072 | -0.897 |
| C      |     |   |   |         |        |        |
| HETATM | 516 | C | 0 | -3.826  | -1.896 | 0.264  |
| C      |     |   |   |         |        |        |
| HETATM | 517 | C | 0 | -4.793  | -2.866 | 0.821  |
| C      |     |   |   |         |        |        |
| HETATM | 518 | C | 0 | -4.331  | -3.985 | 1.609  |
| C      |     |   |   |         |        |        |
| HETATM | 519 | H | 0 | -3.261  | -4.122 | 1.761  |
| H      |     |   |   |         |        |        |
| HETATM | 520 | C | 0 | -5.253  | -4.865 | 2.172  |
| C      |     |   |   |         |        |        |
| HETATM | 521 | H | 0 | -4.918  | -5.717 | 2.767  |
| H      |     |   |   |         |        |        |
| HETATM | 522 | C | 0 | -6.674  | -4.662 | 1.999  |
| C      |     |   |   |         |        |        |
| HETATM | 523 | C | 0 | -7.652  | -5.533 | 2.601  |
| C      |     |   |   |         |        |        |
| HETATM | 524 | H | 0 | -7.302  | -6.372 | 3.205  |
| H      |     |   |   |         |        |        |
| HETATM | 525 | C | 0 | -9.018  | -5.312 | 2.400  |
| C      |     |   |   |         |        |        |
| HETATM | 526 | H | 0 | -9.761  | -5.960 | 2.868  |
| H      |     |   |   |         |        |        |
| HETATM | 527 | C | 0 | -9.470  | -4.208 | 1.592  |
| C      |     |   |   |         |        |        |
| HETATM | 528 | H | 0 | -10.543 | -4.056 | 1.459  |
| H      |     |   |   |         |        |        |
| HETATM | 529 | C | 0 | -8.547  | -3.341 | 1.004  |
| C      |     |   |   |         |        |        |
| HETATM | 530 | H | 0 | -8.877  | -2.488 | 0.409  |
| H      |     |   |   |         |        |        |
| HETATM | 531 | C | 0 | -7.132  | -3.553 | 1.192  |
| C      |     |   |   |         |        |        |
| HETATM | 532 | C | 0 | -6.164  | -2.676 | 0.606  |
| C      |     |   |   |         |        |        |
| HETATM | 533 | H | 0 | -6.529  | -1.847 | -0.004 |
| H      |     |   |   |         |        |        |
| HETATM | 534 | S | 0 | 4.357   | 0.647  | 0.944  |
| S      |     |   |   |         |        |        |
| HETATM | 535 | S | 0 | -1.025  | 2.789  | 3.820  |
| S      |     |   |   |         |        |        |
| HETATM | 536 | N | 0 | 0.797   | -1.288 | 1.342  |
| N      |     |   |   |         |        |        |
| HETATM | 537 | N | 0 | 1.892   | 0.753  | 0.065  |
| N      |     |   |   |         |        |        |
| HETATM | 538 | N | 0 | 2.545   | 1.804  | -0.596 |
| N      |     |   |   |         |        |        |
| HETATM | 539 | N | 0 | -0.487  | 1.166  | 1.483  |
| N      |     |   |   |         |        |        |
| HETATM | 540 | C | 0 | 0.160   | -2.305 | 1.974  |
| C      |     |   |   |         |        |        |
| HETATM | 541 | H | 0 | -0.884  | -2.452 | 1.703  |
| H      |     |   |   |         |        |        |
| HETATM | 542 | C | 0 | -0.691  | 1.830  | 2.446  |
| C      |     |   |   |         |        |        |

|        |     |    |   |        |         |        |
|--------|-----|----|---|--------|---------|--------|
| HETATM | 543 | C  | 0 | 0.816  | -3.118  | 2.930  |
| C      |     |    |   |        |         |        |
| HETATM | 544 | H  | 0 | 0.265  | -3.924  | 3.413  |
| H      |     |    |   |        |         |        |
| HETATM | 545 | C  | 0 | 2.171  | -2.870  | 3.244  |
| C      |     |    |   |        |         |        |
| HETATM | 546 | H  | 0 | 2.697  | -3.487  | 3.973  |
| H      |     |    |   |        |         |        |
| HETATM | 547 | C  | 0 | 2.840  | -1.808  | 2.594  |
| C      |     |    |   |        |         |        |
| HETATM | 548 | H  | 0 | 3.879  | -1.566  | 2.825  |
| H      |     |    |   |        |         |        |
| HETATM | 549 | C  | 0 | 2.112  | -1.049  | 1.652  |
| C      |     |    |   |        |         |        |
| HETATM | 550 | C  | 0 | 2.677  | 0.073   | 0.895  |
| C      |     |    |   |        |         |        |
| HETATM | 551 | C  | 0 | 3.828  | 1.897   | -0.266 |
| C      |     |    |   |        |         |        |
| HETATM | 552 | C  | 0 | 4.795  | 2.867   | -0.822 |
| C      |     |    |   |        |         |        |
| HETATM | 553 | C  | 0 | 4.333  | 3.986   | -1.611 |
| C      |     |    |   |        |         |        |
| HETATM | 554 | H  | 0 | 3.263  | 4.123   | -1.762 |
| H      |     |    |   |        |         |        |
| HETATM | 555 | C  | 0 | 5.254  | 4.867   | -2.173 |
| C      |     |    |   |        |         |        |
| HETATM | 556 | H  | 0 | 4.919  | 5.719   | -2.769 |
| H      |     |    |   |        |         |        |
| HETATM | 557 | C  | 0 | 6.675  | 4.664   | -2.001 |
| C      |     |    |   |        |         |        |
| HETATM | 558 | C  | 0 | 7.652  | 5.536   | -2.603 |
| C      |     |    |   |        |         |        |
| HETATM | 559 | H  | 0 | 7.302  | 6.374   | -3.207 |
| H      |     |    |   |        |         |        |
| HETATM | 560 | C  | 0 | 9.019  | 5.315   | -2.403 |
| C      |     |    |   |        |         |        |
| HETATM | 561 | H  | 0 | 9.762  | 5.962   | -2.871 |
| H      |     |    |   |        |         |        |
| HETATM | 562 | C  | 0 | 9.471  | 4.210   | -1.595 |
| C      |     |    |   |        |         |        |
| HETATM | 563 | H  | 0 | 10.544 | 4.059   | -1.463 |
| H      |     |    |   |        |         |        |
| HETATM | 564 | C  | 0 | 8.549  | 3.344   | -1.006 |
| C      |     |    |   |        |         |        |
| HETATM | 565 | H  | 0 | 8.879  | 2.490   | -0.412 |
| H      |     |    |   |        |         |        |
| HETATM | 566 | C  | 0 | 7.134  | 3.555   | -1.194 |
| C      |     |    |   |        |         |        |
| HETATM | 567 | C  | 0 | 6.166  | 2.678   | -0.607 |
| C      |     |    |   |        |         |        |
| HETATM | 568 | H  | 0 | 6.531  | 1.849   | 0.002  |
| H      |     |    |   |        |         |        |
| HETATM | 569 | Zn | 0 | -4.215 | -11.324 | -0.471 |
| Zn     |     |    |   |        |         |        |
| HETATM | 570 | S  | 0 | -8.673 | -12.026 | -1.334 |
| S      |     |    |   |        |         |        |



|        |     |   |   |         |         |        |
|--------|-----|---|---|---------|---------|--------|
| HETATM | 571 | S | 0 | -3.149  | -13.962 | -4.400 |
| S      |     |   |   |         |         |        |
| HETATM | 572 | N | 0 | -5.233  | -10.079 | -1.972 |
| N      |     |   |   |         |         |        |
| HETATM | 573 | N | 0 | -6.268  | -12.116 | -0.535 |
| N      |     |   |   |         |         |        |
| HETATM | 574 | N | 0 | -6.894  | -13.134 | 0.136  |
| N      |     |   |   |         |         |        |
| HETATM | 575 | N | 0 | -3.684  | -12.628 | -2.016 |
| N      |     |   |   |         |         |        |
| HETATM | 576 | C | 0 | -4.694  | -9.105  | -2.689 |
| C      |     |   |   |         |         |        |
| HETATM | 577 | H | 0 | -3.765  | -8.928  | -2.591 |
| H      |     |   |   |         |         |        |
| HETATM | 578 | C | 0 | -3.475  | -13.183 | -3.011 |
| C      |     |   |   |         |         |        |
| HETATM | 579 | C | 0 | -5.420  | -8.335  | -3.579 |
| C      |     |   |   |         |         |        |
| HETATM | 580 | H | 0 | -4.996  | -7.645  | -4.073 |
| H      |     |   |   |         |         |        |
| HETATM | 581 | C | 0 | -6.755  | -8.575  | -3.738 |
| C      |     |   |   |         |         |        |
| HETATM | 582 | H | 0 | -7.271  | -8.047  | -4.337 |
| H      |     |   |   |         |         |        |
| HETATM | 583 | C | 0 | -7.346  | -9.598  | -3.016 |
| C      |     |   |   |         |         |        |
| HETATM | 584 | H | 0 | -8.272  | -9.791  | -3.115 |
| H      |     |   |   |         |         |        |
| HETATM | 585 | C | 0 | -6.554  | -10.338 | -2.144 |
| C      |     |   |   |         |         |        |
| HETATM | 586 | C | 0 | -7.055  | -11.445 | -1.338 |
| C      |     |   |   |         |         |        |
| HETATM | 587 | C | 0 | -8.173  | -13.208 | -0.172 |
| C      |     |   |   |         |         |        |
| HETATM | 588 | C | 0 | -9.109  | -14.175 | 0.420  |
| C      |     |   |   |         |         |        |
| HETATM | 589 | C | 0 | -8.632  | -15.227 | 1.223  |
| C      |     |   |   |         |         |        |
| HETATM | 590 | H | 0 | -7.698  | -15.323 | 1.369  |
| H      |     |   |   |         |         |        |
| HETATM | 591 | C | 0 | -9.497  | -16.102 | 1.790  |
| C      |     |   |   |         |         |        |
| HETATM | 592 | H | 0 | -9.156  | -16.825 | 2.303  |
| H      |     |   |   |         |         |        |
| HETATM | 593 | C | 0 | -10.916 | -15.958 | 1.630  |
| C      |     |   |   |         |         |        |
| HETATM | 594 | C | 0 | -11.828 | -16.825 | 2.232  |
| C      |     |   |   |         |         |        |
| HETATM | 595 | H | 0 | -11.512 | -17.536 | 2.776  |
| H      |     |   |   |         |         |        |
| HETATM | 596 | C | 0 | -13.183 | -16.661 | 2.043  |
| C      |     |   |   |         |         |        |
| HETATM | 597 | H | 0 | -13.794 | -17.269 | 2.442  |
| H      |     |   |   |         |         |        |
| HETATM | 598 | C | 0 | -13.658 | -15.609 | 1.273  |
| C      |     |   |   |         |         |        |

|        |     |   |   |         |         |        |
|--------|-----|---|---|---------|---------|--------|
| HETATM | 599 | H | 0 | -14.594 | -15.494 | 1.163  |
| H      |     |   |   |         |         |        |
| HETATM | 600 | C | 0 | -12.790 | -14.732 | 0.667  |
| C      |     |   |   |         |         |        |
| HETATM | 601 | H | 0 | -13.125 | -14.016 | 0.141  |
| H      |     |   |   |         |         |        |
| HETATM | 602 | C | 0 | -11.380 | -14.901 | 0.831  |
| C      |     |   |   |         |         |        |
| HETATM | 603 | C | 0 | -10.468 | -14.026 | 0.226  |
| C      |     |   |   |         |         |        |
| HETATM | 604 | H | 0 | -10.787 | -13.322 | -0.326 |
| H      |     |   |   |         |         |        |
| HETATM | 605 | S | 0 | 0.242   | -10.622 | 0.392  |
| S      |     |   |   |         |         |        |
| HETATM | 606 | S | 0 | -5.282  | -8.685  | 3.457  |
| S      |     |   |   |         |         |        |
| HETATM | 607 | N | 0 | -3.198  | -12.569 | 1.029  |
| N      |     |   |   |         |         |        |
| HETATM | 608 | N | 0 | -2.163  | -10.531 | -0.407 |
| N      |     |   |   |         |         |        |
| HETATM | 609 | N | 0 | -1.537  | -9.513  | -1.077 |
| N      |     |   |   |         |         |        |
| HETATM | 610 | N | 0 | -4.747  | -10.020 | 1.074  |
| N      |     |   |   |         |         |        |
| HETATM | 611 | C | 0 | -3.737  | -13.543 | 1.748  |
| C      |     |   |   |         |         |        |
| HETATM | 612 | H | 0 | -4.666  | -13.720 | 1.648  |
| H      |     |   |   |         |         |        |
| HETATM | 613 | C | 0 | -4.956  | -9.464  | 2.069  |
| C      |     |   |   |         |         |        |
| HETATM | 614 | C | 0 | -3.010  | -14.313 | 2.636  |
| C      |     |   |   |         |         |        |
| HETATM | 615 | H | 0 | -3.435  | -15.004 | 3.131  |
| H      |     |   |   |         |         |        |
| HETATM | 616 | C | 0 | -1.675  | -14.073 | 2.797  |
| C      |     |   |   |         |         |        |
| HETATM | 617 | H | 0 | -1.160  | -14.600 | 3.396  |
| H      |     |   |   |         |         |        |
| HETATM | 618 | C | 0 | -1.085  | -13.049 | 2.074  |
| C      |     |   |   |         |         |        |
| HETATM | 619 | H | 0 | -0.159  | -12.856 | 2.172  |
| H      |     |   |   |         |         |        |
| HETATM | 620 | C | 0 | -1.877  | -12.309 | 1.201  |
| C      |     |   |   |         |         |        |
| HETATM | 621 | C | 0 | -1.376  | -11.203 | 0.396  |
| C      |     |   |   |         |         |        |
| HETATM | 622 | C | 0 | -0.258  | -9.439  | -0.769 |
| C      |     |   |   |         |         |        |
| HETATM | 623 | C | 0 | 0.677   | -8.473  | -1.362 |
| C      |     |   |   |         |         |        |
| HETATM | 624 | C | 0 | 0.201   | -7.421  | -2.165 |
| C      |     |   |   |         |         |        |
| HETATM | 625 | H | 0 | -0.733  | -7.324  | -2.311 |
| H      |     |   |   |         |         |        |
| HETATM | 626 | C | 0 | 1.066   | -6.546  | -2.731 |
| C      |     |   |   |         |         |        |

|        |     |    |   |        |        |        |
|--------|-----|----|---|--------|--------|--------|
| HETATM | 627 | H  | 0 | 0.725  | -5.823 | -3.245 |
| H      |     |    |   |        |        |        |
| HETATM | 628 | C  | 0 | 2.485  | -6.690 | -2.572 |
| C      |     |    |   |        |        |        |
| HETATM | 629 | C  | 0 | 3.397  | -5.823 | -3.173 |
| C      |     |    |   |        |        |        |
| HETATM | 630 | H  | 0 | 3.081  | -5.112 | -3.719 |
| H      |     |    |   |        |        |        |
| HETATM | 631 | C  | 0 | 4.752  | -5.988 | -2.985 |
| C      |     |    |   |        |        |        |
| HETATM | 632 | H  | 0 | 5.363  | -5.379 | -3.384 |
| H      |     |    |   |        |        |        |
| HETATM | 633 | C  | 0 | 5.227  | -7.038 | -2.215 |
| C      |     |    |   |        |        |        |
| HETATM | 634 | H  | 0 | 6.163  | -7.153 | -2.105 |
| H      |     |    |   |        |        |        |
| HETATM | 635 | C  | 0 | 4.359  | -7.915 | -1.609 |
| C      |     |    |   |        |        |        |
| HETATM | 636 | H  | 0 | 4.694  | -8.631 | -1.083 |
| H      |     |    |   |        |        |        |
| HETATM | 637 | C  | 0 | 2.949  | -7.747 | -1.773 |
| C      |     |    |   |        |        |        |
| HETATM | 638 | C  | 0 | 2.037  | -8.621 | -1.168 |
| C      |     |    |   |        |        |        |
| HETATM | 639 | H  | 0 | 2.356  | -9.326 | -0.616 |
| H      |     |    |   |        |        |        |
| HETATM | 640 | Zn | 0 | -3.234 | 14.118 | 0.331  |
| Zn     |     |    |   |        |        |        |
| HETATM | 641 | S  | 0 | -7.692 | 13.416 | -0.531 |
| S      |     |    |   |        |        |        |
| HETATM | 642 | S  | 0 | -2.167 | 11.479 | -3.597 |
| S      |     |    |   |        |        |        |
| HETATM | 643 | N  | 0 | -4.251 | 15.363 | -1.170 |
| N      |     |    |   |        |        |        |
| HETATM | 644 | N  | 0 | -5.287 | 13.324 | 0.267  |
| N      |     |    |   |        |        |        |
| HETATM | 645 | N  | 0 | -5.912 | 12.307 | 0.938  |
| N      |     |    |   |        |        |        |
| HETATM | 646 | N  | 0 | -2.703 | 12.814 | -1.214 |
| N      |     |    |   |        |        |        |
| HETATM | 647 | C  | 0 | -3.711 | 16.337 | -1.887 |
| C      |     |    |   |        |        |        |
| HETATM | 648 | H  | 0 | -2.784 | 16.514 | -1.788 |
| H      |     |    |   |        |        |        |
| HETATM | 649 | C  | 0 | -2.493 | 12.258 | -2.209 |
| C      |     |    |   |        |        |        |
| HETATM | 650 | C  | 0 | -4.439 | 17.107 | -2.777 |
| C      |     |    |   |        |        |        |
| HETATM | 651 | H  | 0 | -4.015 | 17.797 | -3.271 |
| H      |     |    |   |        |        |        |
| HETATM | 652 | C  | 0 | -5.773 | 16.867 | -2.937 |
| C      |     |    |   |        |        |        |
| HETATM | 653 | H  | 0 | -6.289 | 17.395 | -3.535 |
| H      |     |    |   |        |        |        |
| HETATM | 654 | C  | 0 | -6.365 | 15.842 | -2.214 |
| C      |     |    |   |        |        |        |

|        |     |   |   |         |        |        |
|--------|-----|---|---|---------|--------|--------|
| HETATM | 655 | H | 0 | -7.290  | 15.650 | -2.313 |
| H      |     |   |   |         |        |        |
| HETATM | 656 | C | 0 | -5.573  | 15.102 | -1.342 |
| C      |     |   |   |         |        |        |
| HETATM | 657 | C | 0 | -6.073  | 13.997 | -0.536 |
| C      |     |   |   |         |        |        |
| HETATM | 658 | C | 0 | -7.192  | 12.234 | 0.630  |
| C      |     |   |   |         |        |        |
| HETATM | 659 | C | 0 | -8.127  | 11.267 | 1.222  |
| C      |     |   |   |         |        |        |
| HETATM | 660 | C | 0 | -7.650  | 10.215 | 2.025  |
| C      |     |   |   |         |        |        |
| HETATM | 661 | H | 0 | -6.716  | 10.118 | 2.171  |
| H      |     |   |   |         |        |        |
| HETATM | 662 | C | 0 | -8.515  | 9.340  | 2.592  |
| C      |     |   |   |         |        |        |
| HETATM | 663 | H | 0 | -8.175  | 8.616  | 3.105  |
| H      |     |   |   |         |        |        |
| HETATM | 664 | C | 0 | -9.934  | 9.483  | 2.432  |
| C      |     |   |   |         |        |        |
| HETATM | 665 | C | 0 | -10.846 | 8.616  | 3.033  |
| C      |     |   |   |         |        |        |
| HETATM | 666 | H | 0 | -10.530 | 7.905  | 3.578  |
| H      |     |   |   |         |        |        |
| HETATM | 667 | C | 0 | -12.202 | 8.781  | 2.845  |
| C      |     |   |   |         |        |        |
| HETATM | 668 | H | 0 | -12.812 | 8.173  | 3.244  |
| H      |     |   |   |         |        |        |
| HETATM | 669 | C | 0 | -12.676 | 9.832  | 2.075  |
| C      |     |   |   |         |        |        |
| HETATM | 670 | H | 0 | -13.613 | 9.948  | 1.964  |
| H      |     |   |   |         |        |        |
| HETATM | 671 | C | 0 | -11.808 | 10.709 | 1.469  |
| C      |     |   |   |         |        |        |
| HETATM | 672 | H | 0 | -12.144 | 11.425 | 0.943  |
| H      |     |   |   |         |        |        |
| HETATM | 673 | C | 0 | -10.398 | 10.541 | 1.634  |
| C      |     |   |   |         |        |        |
| HETATM | 674 | C | 0 | -9.485  | 11.415 | 1.027  |
| C      |     |   |   |         |        |        |
| HETATM | 675 | H | 0 | -9.806  | 12.119 | 0.476  |
| H      |     |   |   |         |        |        |
| HETATM | 676 | S | 0 | 1.223   | 14.819 | 1.194  |
| S      |     |   |   |         |        |        |
| HETATM | 677 | S | 0 | -4.301  | 16.757 | 4.259  |
| S      |     |   |   |         |        |        |
| HETATM | 678 | N | 0 | -2.217  | 12.872 | 1.831  |
| N      |     |   |   |         |        |        |
| HETATM | 679 | N | 0 | -1.182  | 14.911 | 0.395  |
| N      |     |   |   |         |        |        |
| HETATM | 680 | N | 0 | -0.556  | 15.929 | -0.275 |
| N      |     |   |   |         |        |        |
| HETATM | 681 | N | 0 | -3.766  | 15.421 | 1.876  |
| N      |     |   |   |         |        |        |
| HETATM | 682 | C | 0 | -2.756  | 11.898 | 2.550  |
| C      |     |   |   |         |        |        |

|        |     |   |   |        |        |        |
|--------|-----|---|---|--------|--------|--------|
| HETATM | 683 | H | 0 | -3.684 | 11.722 | 2.450  |
| H      |     |   |   |        |        |        |
| HETATM | 684 | C | 0 | -3.974 | 15.977 | 2.871  |
| C      |     |   |   |        |        |        |
| HETATM | 685 | C | 0 | -2.028 | 11.129 | 3.438  |
| C      |     |   |   |        |        |        |
| HETATM | 686 | H | 0 | -2.454 | 10.438 | 3.933  |
| H      |     |   |   |        |        |        |
| HETATM | 687 | C | 0 | -0.694 | 11.368 | 3.599  |
| C      |     |   |   |        |        |        |
| HETATM | 688 | H | 0 | -0.179 | 10.840 | 4.198  |
| H      |     |   |   |        |        |        |
| HETATM | 689 | C | 0 | -0.103 | 12.392 | 2.876  |
| C      |     |   |   |        |        |        |
| HETATM | 690 | H | 0 | 0.822  | 12.585 | 2.974  |
| H      |     |   |   |        |        |        |
| HETATM | 691 | C | 0 | -0.895 | 13.133 | 2.003  |
| C      |     |   |   |        |        |        |
| HETATM | 692 | C | 0 | -0.394 | 14.238 | 1.198  |
| C      |     |   |   |        |        |        |
| HETATM | 693 | C | 0 | 0.723  | 16.002 | 0.033  |
| C      |     |   |   |        |        |        |
| HETATM | 694 | C | 0 | 1.659  | 16.968 | -0.560 |
| C      |     |   |   |        |        |        |
| HETATM | 695 | C | 0 | 1.182  | 18.020 | -1.364 |
| C      |     |   |   |        |        |        |
| HETATM | 696 | H | 0 | 0.248  | 18.117 | -1.509 |
| H      |     |   |   |        |        |        |
| HETATM | 697 | C | 0 | 2.047  | 18.895 | -1.929 |
| C      |     |   |   |        |        |        |
| HETATM | 698 | H | 0 | 1.707  | 19.619 | -2.443 |
| H      |     |   |   |        |        |        |
| HETATM | 699 | C | 0 | 3.467  | 18.751 | -1.770 |
| C      |     |   |   |        |        |        |
| HETATM | 700 | C | 0 | 4.379  | 19.619 | -2.371 |
| C      |     |   |   |        |        |        |
| HETATM | 701 | H | 0 | 4.062  | 20.330 | -2.917 |
| H      |     |   |   |        |        |        |
| HETATM | 702 | C | 0 | 5.733  | 19.454 | -2.183 |
| C      |     |   |   |        |        |        |
| HETATM | 703 | H | 0 | 6.344  | 20.063 | -2.582 |
| H      |     |   |   |        |        |        |
| HETATM | 704 | C | 0 | 6.208  | 18.403 | -1.413 |
| C      |     |   |   |        |        |        |
| HETATM | 705 | H | 0 | 7.144  | 18.287 | -1.303 |
| H      |     |   |   |        |        |        |
| HETATM | 706 | C | 0 | 5.340  | 17.526 | -0.807 |
| C      |     |   |   |        |        |        |
| HETATM | 707 | H | 0 | 5.676  | 16.810 | -0.281 |
| H      |     |   |   |        |        |        |
| HETATM | 708 | C | 0 | 3.930  | 17.694 | -0.971 |
| C      |     |   |   |        |        |        |
| HETATM | 709 | C | 0 | 3.018  | 16.820 | -0.366 |
| C      |     |   |   |        |        |        |
| HETATM | 710 | H | 0 | 3.338  | 16.116 | 0.186  |
| H      |     |   |   |        |        |        |

|        |     |    |   |         |        |        |
|--------|-----|----|---|---------|--------|--------|
| HETATM | 711 | Zn | 0 | -7.449  | 2.794  | -0.140 |
| Zn     |     |    |   |         |        |        |
| HETATM | 712 | S  | 0 | -11.907 | 2.092  | -1.003 |
| S      |     |    |   |         |        |        |
| HETATM | 713 | S  | 0 | -6.382  | 0.155  | -4.068 |
| S      |     |    |   |         |        |        |
| HETATM | 714 | N  | 0 | -8.466  | 4.038  | -1.641 |
| N      |     |    |   |         |        |        |
| HETATM | 715 | N  | 0 | -9.502  | 2.001  | -0.203 |
| N      |     |    |   |         |        |        |
| HETATM | 716 | N  | 0 | -10.128 | 0.984  | 0.466  |
| N      |     |    |   |         |        |        |
| HETATM | 717 | N  | 0 | -6.918  | 1.490  | -1.685 |
| N      |     |    |   |         |        |        |
| HETATM | 718 | C  | 0 | -7.927  | 5.013  | -2.359 |
| C      |     |    |   |         |        |        |
| HETATM | 719 | H  | 0 | -6.999  | 5.190  | -2.259 |
| H      |     |    |   |         |        |        |
| HETATM | 720 | C  | 0 | -6.709  | 0.935  | -2.681 |
| C      |     |    |   |         |        |        |
| HETATM | 721 | C  | 0 | -8.655  | 5.783  | -3.247 |
| C      |     |    |   |         |        |        |
| HETATM | 722 | H  | 0 | -8.229  | 6.473  | -3.742 |
| H      |     |    |   |         |        |        |
| HETATM | 723 | C  | 0 | -9.989  | 5.543  | -3.408 |
| C      |     |    |   |         |        |        |
| HETATM | 724 | H  | 0 | -10.504 | 6.071  | -4.007 |
| H      |     |    |   |         |        |        |
| HETATM | 725 | C  | 0 | -10.580 | 4.519  | -2.685 |
| C      |     |    |   |         |        |        |
| HETATM | 726 | H  | 0 | -11.505 | 4.326  | -2.783 |
| H      |     |    |   |         |        |        |
| HETATM | 727 | C  | 0 | -9.789  | 3.778  | -1.813 |
| C      |     |    |   |         |        |        |
| HETATM | 728 | C  | 0 | -10.289 | 2.673  | -1.008 |
| C      |     |    |   |         |        |        |
| HETATM | 729 | C  | 0 | -11.406 | 0.910  | 0.158  |
| C      |     |    |   |         |        |        |
| HETATM | 730 | C  | 0 | -12.343 | -0.057 | 0.751  |
| C      |     |    |   |         |        |        |
| HETATM | 731 | C  | 0 | -11.865 | -1.109 | 1.555  |
| C      |     |    |   |         |        |        |
| HETATM | 732 | H  | 0 | -10.932 | -1.206 | 1.700  |
| H      |     |    |   |         |        |        |
| HETATM | 733 | C  | 0 | -12.730 | -1.984 | 2.120  |
| C      |     |    |   |         |        |        |
| HETATM | 734 | H  | 0 | -12.390 | -2.707 | 2.634  |
| H      |     |    |   |         |        |        |
| HETATM | 735 | C  | 0 | -14.150 | -1.840 | 1.961  |
| C      |     |    |   |         |        |        |
| HETATM | 736 | C  | 0 | -15.062 | -2.707 | 2.562  |
| C      |     |    |   |         |        |        |
| HETATM | 737 | H  | 0 | -14.745 | -3.418 | 3.108  |
| H      |     |    |   |         |        |        |
| HETATM | 738 | C  | 0 | -16.416 | -2.543 | 2.374  |
| C      |     |    |   |         |        |        |

|        |     |   |   |         |        |        |
|--------|-----|---|---|---------|--------|--------|
| HETATM | 739 | H | 0 | -17.027 | -3.151 | 2.773  |
| H      |     |   |   |         |        |        |
| HETATM | 740 | C | 0 | -16.891 | -1.492 | 1.604  |
| C      |     |   |   |         |        |        |
| HETATM | 741 | H | 0 | -17.827 | -1.377 | 1.494  |
| H      |     |   |   |         |        |        |
| HETATM | 742 | C | 0 | -16.024 | -0.614 | 0.998  |
| C      |     |   |   |         |        |        |
| HETATM | 743 | H | 0 | -16.360 | 0.102  | 0.471  |
| H      |     |   |   |         |        |        |
| HETATM | 744 | C | 0 | -14.613 | -0.783 | 1.162  |
| C      |     |   |   |         |        |        |
| HETATM | 745 | C | 0 | -13.701 | 0.091  | 0.557  |
| C      |     |   |   |         |        |        |
| HETATM | 746 | H | 0 | -14.022 | 0.795  | 0.004  |
| H      |     |   |   |         |        |        |
| HETATM | 747 | S | 0 | -2.991  | 3.496  | 0.722  |
| S      |     |   |   |         |        |        |
| HETATM | 748 | S | 0 | -8.517  | 5.433  | 3.788  |
| S      |     |   |   |         |        |        |
| HETATM | 749 | N | 0 | -6.433  | 1.549  | 1.361  |
| N      |     |   |   |         |        |        |
| HETATM | 750 | N | 0 | -5.397  | 3.587  | -0.077 |
| N      |     |   |   |         |        |        |
| HETATM | 751 | N | 0 | -4.770  | 4.605  | -0.747 |
| N      |     |   |   |         |        |        |
| HETATM | 752 | N | 0 | -7.981  | 4.098  | 1.404  |
| N      |     |   |   |         |        |        |
| HETATM | 753 | C | 0 | -6.971  | 0.575  | 2.078  |
| C      |     |   |   |         |        |        |
| HETATM | 754 | H | 0 | -7.899  | 0.398  | 1.979  |
| H      |     |   |   |         |        |        |
| HETATM | 755 | C | 0 | -8.190  | 4.653  | 2.401  |
| C      |     |   |   |         |        |        |
| HETATM | 756 | C | 0 | -6.244  | -0.195 | 2.967  |
| C      |     |   |   |         |        |        |
| HETATM | 757 | H | 0 | -6.669  | -0.886 | 3.461  |
| H      |     |   |   |         |        |        |
| HETATM | 758 | C | 0 | -4.910  | 0.044  | 3.128  |
| C      |     |   |   |         |        |        |
| HETATM | 759 | H | 0 | -4.393  | -0.483 | 3.726  |
| H      |     |   |   |         |        |        |
| HETATM | 760 | C | 0 | -4.319  | 1.069  | 2.404  |
| C      |     |   |   |         |        |        |
| HETATM | 761 | H | 0 | -3.393  | 1.262  | 2.503  |
| H      |     |   |   |         |        |        |
| HETATM | 762 | C | 0 | -5.110  | 1.809  | 1.532  |
| C      |     |   |   |         |        |        |
| HETATM | 763 | C | 0 | -4.609  | 2.915  | 0.727  |
| C      |     |   |   |         |        |        |
| HETATM | 764 | C | 0 | -3.492  | 4.679  | -0.439 |
| C      |     |   |   |         |        |        |
| HETATM | 765 | C | 0 | -2.556  | 5.644  | -1.032 |
| C      |     |   |   |         |        |        |
| HETATM | 766 | C | 0 | -3.034  | 6.697  | -1.835 |
| C      |     |   |   |         |        |        |

|        |     |    |   |         |         |        |
|--------|-----|----|---|---------|---------|--------|
| HETATM | 767 | H  | 0 | -3.967  | 6.794   | -1.980 |
| H      |     |    |   |         |         |        |
| HETATM | 768 | C  | 0 | -2.168  | 7.572   | -2.400 |
| C      |     |    |   |         |         |        |
| HETATM | 769 | H  | 0 | -2.508  | 8.295   | -2.914 |
| H      |     |    |   |         |         |        |
| HETATM | 770 | C  | 0 | -0.749  | 7.428   | -2.242 |
| C      |     |    |   |         |         |        |
| HETATM | 771 | C  | 0 | 0.163   | 8.295   | -2.843 |
| C      |     |    |   |         |         |        |
| HETATM | 772 | H  | 0 | -0.154  | 9.006   | -3.388 |
| H      |     |    |   |         |         |        |
| HETATM | 773 | C  | 0 | 1.517   | 8.130   | -2.654 |
| C      |     |    |   |         |         |        |
| HETATM | 774 | H  | 0 | 2.128   | 8.739   | -3.054 |
| H      |     |    |   |         |         |        |
| HETATM | 775 | C  | 0 | 1.992   | 7.079   | -1.885 |
| C      |     |    |   |         |         |        |
| HETATM | 776 | H  | 0 | 2.929   | 6.965   | -1.773 |
| H      |     |    |   |         |         |        |
| HETATM | 777 | C  | 0 | 1.125   | 6.202   | -1.279 |
| C      |     |    |   |         |         |        |
| HETATM | 778 | H  | 0 | 1.461   | 5.486   | -0.752 |
| H      |     |    |   |         |         |        |
| HETATM | 779 | C  | 0 | -0.286  | 6.370   | -1.443 |
| C      |     |    |   |         |         |        |
| HETATM | 780 | C  | 0 | -1.198  | 5.496   | -0.837 |
| C      |     |    |   |         |         |        |
| HETATM | 781 | H  | 0 | -0.877  | 4.792   | -0.285 |
| H      |     |    |   |         |         |        |
| HETATM | 782 | Zn | 0 | -11.665 | -8.530  | -0.612 |
| Zn     |     |    |   |         |         |        |
| HETATM | 783 | S  | 0 | -16.122 | -9.232  | -1.474 |
| S      |     |    |   |         |         |        |
| HETATM | 784 | S  | 0 | -10.598 | -11.169 | -4.540 |
| S      |     |    |   |         |         |        |
| HETATM | 785 | N  | 0 | -12.682 | -7.285  | -2.112 |
| N      |     |    |   |         |         |        |
| HETATM | 786 | N  | 0 | -13.717 | -9.323  | -0.675 |
| N      |     |    |   |         |         |        |
| HETATM | 787 | N  | 0 | -14.343 | -10.341 | -0.005 |
| N      |     |    |   |         |         |        |
| HETATM | 788 | N  | 0 | -11.133 | -9.834  | -2.156 |
| N      |     |    |   |         |         |        |
| HETATM | 789 | C  | 0 | -12.143 | -6.311  | -2.830 |
| C      |     |    |   |         |         |        |
| HETATM | 790 | H  | 0 | -11.214 | -6.134  | -2.731 |
| H      |     |    |   |         |         |        |
| HETATM | 791 | C  | 0 | -10.924 | -10.389 | -3.151 |
| C      |     |    |   |         |         |        |
| HETATM | 792 | C  | 0 | -12.870 | -5.541  | -3.719 |
| C      |     |    |   |         |         |        |
| HETATM | 793 | H  | 0 | -12.445 | -4.851  | -4.213 |
| H      |     |    |   |         |         |        |
| HETATM | 794 | C  | 0 | -14.205 | -5.780  | -3.879 |
| C      |     |    |   |         |         |        |



|        |     |   |   |         |         |        |
|--------|-----|---|---|---------|---------|--------|
| HETATM | 795 | H | 0 | -14.720 | -5.253  | -4.478 |
| H      |     |   |   |         |         |        |
| HETATM | 796 | C | 0 | -14.795 | -6.805  | -3.156 |
| C      |     |   |   |         |         |        |
| HETATM | 797 | H | 0 | -15.721 | -6.998  | -3.255 |
| H      |     |   |   |         |         |        |
| HETATM | 798 | C | 0 | -14.003 | -7.545  | -2.284 |
| C      |     |   |   |         |         |        |
| HETATM | 799 | C | 0 | -14.504 | -8.651  | -1.478 |
| C      |     |   |   |         |         |        |
| HETATM | 800 | C | 0 | -15.622 | -10.414 | -0.313 |
| C      |     |   |   |         |         |        |
| HETATM | 801 | C | 0 | -16.558 | -11.381 | 0.280  |
| C      |     |   |   |         |         |        |
| HETATM | 802 | C | 0 | -16.081 | -12.433 | 1.083  |
| C      |     |   |   |         |         |        |
| HETATM | 803 | H | 0 | -15.147 | -12.530 | 1.228  |
| H      |     |   |   |         |         |        |
| HETATM | 804 | C | 0 | -16.946 | -13.308 | 1.649  |
| C      |     |   |   |         |         |        |
| HETATM | 805 | H | 0 | -16.605 | -14.031 | 2.163  |
| H      |     |   |   |         |         |        |
| HETATM | 806 | C | 0 | -18.366 | -13.164 | 1.490  |
| C      |     |   |   |         |         |        |
| HETATM | 807 | C | 0 | -19.277 | -14.031 | 2.091  |
| C      |     |   |   |         |         |        |
| HETATM | 808 | H | 0 | -18.961 | -14.742 | 2.636  |
| H      |     |   |   |         |         |        |
| HETATM | 809 | C | 0 | -20.632 | -13.867 | 1.903  |
| C      |     |   |   |         |         |        |
| HETATM | 810 | H | 0 | -21.243 | -14.475 | 2.302  |
| H      |     |   |   |         |         |        |
| HETATM | 811 | C | 0 | -21.107 | -12.816 | 1.133  |
| C      |     |   |   |         |         |        |
| HETATM | 812 | H | 0 | -22.043 | -12.700 | 1.023  |
| H      |     |   |   |         |         |        |
| HETATM | 813 | C | 0 | -20.239 | -11.938 | 0.527  |
| C      |     |   |   |         |         |        |
| HETATM | 814 | H | 0 | -20.575 | -11.223 | 0.001  |
| H      |     |   |   |         |         |        |
| HETATM | 815 | C | 0 | -18.829 | -12.107 | 0.691  |
| C      |     |   |   |         |         |        |
| HETATM | 816 | C | 0 | -17.917 | -11.232 | 0.086  |
| C      |     |   |   |         |         |        |
| HETATM | 817 | H | 0 | -18.236 | -10.528 | -0.466 |
| H      |     |   |   |         |         |        |
| HETATM | 818 | S | 0 | -7.207  | -7.828  | 0.252  |
| S      |     |   |   |         |         |        |
| HETATM | 819 | S | 0 | -12.731 | -5.891  | 3.317  |
| S      |     |   |   |         |         |        |
| HETATM | 820 | N | 0 | -10.647 | -9.775  | 0.889  |
| N      |     |   |   |         |         |        |
| HETATM | 821 | N | 0 | -9.612  | -7.737  | -0.547 |
| N      |     |   |   |         |         |        |
| HETATM | 822 | N | 0 | -8.986  | -6.719  | -1.218 |
| N      |     |   |   |         |         |        |

|        |     |   |   |         |         |        |
|--------|-----|---|---|---------|---------|--------|
| HETATM | 823 | N | 0 | -12.196 | -7.226  | 0.934  |
| N      |     |   |   |         |         |        |
| HETATM | 824 | C | 0 | -11.186 | -10.749 | 1.607  |
| C      |     |   |   |         |         |        |
| HETATM | 825 | H | 0 | -12.115 | -10.926 | 1.508  |
| H      |     |   |   |         |         |        |
| HETATM | 826 | C | 0 | -12.405 | -6.671  | 1.929  |
| C      |     |   |   |         |         |        |
| HETATM | 827 | C | 0 | -10.460 | -11.518 | 2.496  |
| C      |     |   |   |         |         |        |
| HETATM | 828 | H | 0 | -10.884 | -12.210 | 2.991  |
| H      |     |   |   |         |         |        |
| HETATM | 829 | C | 0 | -9.125  | -11.279 | 2.656  |
| C      |     |   |   |         |         |        |
| HETATM | 830 | H | 0 | -8.609  | -11.807 | 3.255  |
| H      |     |   |   |         |         |        |
| HETATM | 831 | C | 0 | -8.534  | -10.255 | 1.934  |
| C      |     |   |   |         |         |        |
| HETATM | 832 | H | 0 | -7.608  | -10.062 | 2.032  |
| H      |     |   |   |         |         |        |
| HETATM | 833 | C | 0 | -9.326  | -9.515  | 1.061  |
| C      |     |   |   |         |         |        |
| HETATM | 834 | C | 0 | -8.825  | -8.409  | 0.256  |
| C      |     |   |   |         |         |        |
| HETATM | 835 | C | 0 | -7.707  | -6.646  | -0.910 |
| C      |     |   |   |         |         |        |
| HETATM | 836 | C | 0 | -6.772  | -5.679  | -1.502 |
| C      |     |   |   |         |         |        |
| HETATM | 837 | C | 0 | -7.248  | -4.627  | -2.305 |
| C      |     |   |   |         |         |        |
| HETATM | 838 | H | 0 | -8.182  | -4.530  | -2.452 |
| H      |     |   |   |         |         |        |
| HETATM | 839 | C | 0 | -6.384  | -3.752  | -2.872 |
| C      |     |   |   |         |         |        |
| HETATM | 840 | H | 0 | -6.724  | -3.029  | -3.385 |
| H      |     |   |   |         |         |        |
| HETATM | 841 | C | 0 | -4.965  | -3.896  | -2.712 |
| C      |     |   |   |         |         |        |
| HETATM | 842 | C | 0 | -4.052  | -3.029  | -3.314 |
| C      |     |   |   |         |         |        |
| HETATM | 843 | H | 0 | -4.368  | -2.318  | -3.859 |
| H      |     |   |   |         |         |        |
| HETATM | 844 | C | 0 | -2.697  | -3.194  | -3.125 |
| C      |     |   |   |         |         |        |
| HETATM | 845 | H | 0 | -2.087  | -2.585  | -3.524 |
| H      |     |   |   |         |         |        |
| HETATM | 846 | C | 0 | -2.222  | -4.244  | -2.355 |
| C      |     |   |   |         |         |        |
| HETATM | 847 | H | 0 | -1.286  | -4.360  | -2.245 |
| H      |     |   |   |         |         |        |
| HETATM | 848 | C | 0 | -3.091  | -5.122  | -1.749 |
| C      |     |   |   |         |         |        |
| HETATM | 849 | H | 0 | -2.754  | -5.837  | -1.223 |
| H      |     |   |   |         |         |        |
| HETATM | 850 | C | 0 | -4.500  | -4.953  | -1.913 |
| C      |     |   |   |         |         |        |

|        |     |    |   |         |        |        |
|--------|-----|----|---|---------|--------|--------|
| HETATM | 851 | C  | 0 | -5.413  | -5.827 | -1.308 |
| C      |     |    |   |         |        |        |
| HETATM | 852 | H  | 0 | -5.093  | -6.532 | -0.756 |
| H      |     |    |   |         |        |        |
| HETATM | 853 | Zn | 0 | -10.683 | 16.912 | 0.190  |
| Zn     |     |    |   |         |        |        |
| HETATM | 854 | S  | 0 | -15.141 | 16.210 | -0.672 |
| S      |     |    |   |         |        |        |
| HETATM | 855 | S  | 0 | -9.616  | 14.273 | -3.738 |
| S      |     |    |   |         |        |        |
| HETATM | 856 | N  | 0 | -11.701 | 18.157 | -1.310 |
| N      |     |    |   |         |        |        |
| HETATM | 857 | N  | 0 | -12.736 | 16.118 | 0.127  |
| N      |     |    |   |         |        |        |
| HETATM | 858 | N  | 0 | -13.362 | 15.101 | 0.798  |
| N      |     |    |   |         |        |        |
| HETATM | 859 | N  | 0 | -10.152 | 15.608 | -1.354 |
| N      |     |    |   |         |        |        |
| HETATM | 860 | C  | 0 | -11.161 | 19.131 | -2.028 |
| C      |     |    |   |         |        |        |
| HETATM | 861 | H  | 0 | -10.233 | 19.308 | -1.929 |
| H      |     |    |   |         |        |        |
| HETATM | 862 | C  | 0 | -9.943  | 15.052 | -2.349 |
| C      |     |    |   |         |        |        |
| HETATM | 863 | C  | 0 | -11.889 | 19.901 | -2.917 |
| C      |     |    |   |         |        |        |
| HETATM | 864 | H  | 0 | -11.464 | 20.591 | -3.411 |
| H      |     |    |   |         |        |        |
| HETATM | 865 | C  | 0 | -13.222 | 19.661 | -3.078 |
| C      |     |    |   |         |        |        |
| HETATM | 866 | H  | 0 | -13.739 | 20.188 | -3.676 |
| H      |     |    |   |         |        |        |
| HETATM | 867 | C  | 0 | -13.814 | 18.636 | -2.354 |
| C      |     |    |   |         |        |        |
| HETATM | 868 | H  | 0 | -14.739 | 18.444 | -2.453 |
| H      |     |    |   |         |        |        |
| HETATM | 869 | C  | 0 | -13.022 | 17.896 | -1.482 |
| C      |     |    |   |         |        |        |
| HETATM | 870 | C  | 0 | -13.523 | 16.791 | -0.676 |
| C      |     |    |   |         |        |        |
| HETATM | 871 | C  | 0 | -14.641 | 15.027 | 0.489  |
| C      |     |    |   |         |        |        |
| HETATM | 872 | C  | 0 | -15.576 | 14.061 | 1.082  |
| C      |     |    |   |         |        |        |
| HETATM | 873 | C  | 0 | -15.099 | 13.009 | 1.885  |
| C      |     |    |   |         |        |        |
| HETATM | 874 | H  | 0 | -14.165 | 12.912 | 2.030  |
| H      |     |    |   |         |        |        |
| HETATM | 875 | C  | 0 | -15.965 | 12.134 | 2.451  |
| C      |     |    |   |         |        |        |
| HETATM | 876 | H  | 0 | -15.624 | 11.410 | 2.965  |
| H      |     |    |   |         |        |        |
| HETATM | 877 | C  | 0 | -17.384 | 12.277 | 2.292  |
| C      |     |    |   |         |        |        |
| HETATM | 878 | C  | 0 | -18.296 | 11.410 | 2.893  |
| C      |     |    |   |         |        |        |

|        |     |   |   |         |        |        |
|--------|-----|---|---|---------|--------|--------|
| HETATM | 879 | H | 0 | -17.980 | 10.699 | 3.438  |
| H      |     |   |   |         |        |        |
| HETATM | 880 | C | 0 | -19.651 | 11.575 | 2.705  |
| C      |     |   |   |         |        |        |
| HETATM | 881 | H | 0 | -20.261 | 10.967 | 3.104  |
| H      |     |   |   |         |        |        |
| HETATM | 882 | C | 0 | -20.125 | 12.626 | 1.935  |
| C      |     |   |   |         |        |        |
| HETATM | 883 | H | 0 | -21.062 | 12.741 | 1.824  |
| H      |     |   |   |         |        |        |
| HETATM | 884 | C | 0 | -19.257 | 13.503 | 1.329  |
| C      |     |   |   |         |        |        |
| HETATM | 885 | H | 0 | -19.593 | 14.219 | 0.803  |
| H      |     |   |   |         |        |        |
| HETATM | 886 | C | 0 | -17.847 | 13.335 | 1.493  |
| C      |     |   |   |         |        |        |
| HETATM | 887 | C | 0 | -16.935 | 14.209 | 0.887  |
| C      |     |   |   |         |        |        |
| HETATM | 888 | H | 0 | -17.255 | 14.913 | 0.336  |
| H      |     |   |   |         |        |        |
| HETATM | 889 | S | 0 | -6.226  | 17.613 | 1.053  |
| S      |     |   |   |         |        |        |
| HETATM | 890 | S | 0 | -11.750 | 19.551 | 4.119  |
| S      |     |   |   |         |        |        |
| HETATM | 891 | N | 0 | -9.666  | 15.666 | 1.691  |
| N      |     |   |   |         |        |        |
| HETATM | 892 | N | 0 | -8.631  | 17.704 | 0.255  |
| N      |     |   |   |         |        |        |
| HETATM | 893 | N | 0 | -8.005  | 18.722 | -0.416 |
| N      |     |   |   |         |        |        |
| HETATM | 894 | N | 0 | -11.215 | 18.215 | 1.736  |
| N      |     |   |   |         |        |        |
| HETATM | 895 | C | 0 | -10.205 | 14.692 | 2.409  |
| C      |     |   |   |         |        |        |
| HETATM | 896 | H | 0 | -11.133 | 14.516 | 2.310  |
| H      |     |   |   |         |        |        |
| HETATM | 897 | C | 0 | -11.423 | 18.771 | 2.731  |
| C      |     |   |   |         |        |        |
| HETATM | 898 | C | 0 | -9.477  | 13.923 | 3.298  |
| C      |     |   |   |         |        |        |
| HETATM | 899 | H | 0 | -9.903  | 13.232 | 3.793  |
| H      |     |   |   |         |        |        |
| HETATM | 900 | C | 0 | -8.144  | 14.163 | 3.459  |
| C      |     |   |   |         |        |        |
| HETATM | 901 | H | 0 | -7.628  | 13.634 | 4.057  |
| H      |     |   |   |         |        |        |
| HETATM | 902 | C | 0 | -7.553  | 15.186 | 2.736  |
| C      |     |   |   |         |        |        |
| HETATM | 903 | H | 0 | -6.627  | 15.379 | 2.834  |
| H      |     |   |   |         |        |        |
| HETATM | 904 | C | 0 | -8.344  | 15.927 | 1.863  |
| C      |     |   |   |         |        |        |
| HETATM | 905 | C | 0 | -7.844  | 17.032 | 1.058  |
| C      |     |   |   |         |        |        |
| HETATM | 906 | C | 0 | -6.726  | 18.796 | -0.108 |
| C      |     |   |   |         |        |        |

|        |     |    |   |         |        |        |
|--------|-----|----|---|---------|--------|--------|
| HETATM | 907 | C  | 0 | -5.790  | 19.762 | -0.700 |
| C      |     |    |   |         |        |        |
| HETATM | 908 | C  | 0 | -6.267  | 20.814 | -1.504 |
| C      |     |    |   |         |        |        |
| HETATM | 909 | H  | 0 | -7.201  | 20.911 | -1.650 |
| H      |     |    |   |         |        |        |
| HETATM | 910 | C  | 0 | -5.402  | 21.689 | -2.070 |
| C      |     |    |   |         |        |        |
| HETATM | 911 | H  | 0 | -5.742  | 22.413 | -2.583 |
| H      |     |    |   |         |        |        |
| HETATM | 912 | C  | 0 | -3.982  | 21.545 | -1.910 |
| C      |     |    |   |         |        |        |
| HETATM | 913 | C  | 0 | -3.071  | 22.413 | -2.511 |
| C      |     |    |   |         |        |        |
| HETATM | 914 | H  | 0 | -3.387  | 23.124 | -3.057 |
| H      |     |    |   |         |        |        |
| HETATM | 915 | C  | 0 | -1.716  | 22.248 | -2.323 |
| C      |     |    |   |         |        |        |
| HETATM | 916 | H  | 0 | -1.105  | 22.857 | -2.722 |
| H      |     |    |   |         |        |        |
| HETATM | 917 | C  | 0 | -1.241  | 21.196 | -1.553 |
| C      |     |    |   |         |        |        |
| HETATM | 918 | H  | 0 | -0.305  | 21.081 | -1.443 |
| H      |     |    |   |         |        |        |
| HETATM | 919 | C  | 0 | -2.109  | 20.320 | -0.947 |
| C      |     |    |   |         |        |        |
| HETATM | 920 | H  | 0 | -1.773  | 19.604 | -0.421 |
| H      |     |    |   |         |        |        |
| HETATM | 921 | C  | 0 | -3.519  | 20.488 | -1.112 |
| C      |     |    |   |         |        |        |
| HETATM | 922 | C  | 0 | -4.431  | 19.614 | -0.506 |
| C      |     |    |   |         |        |        |
| HETATM | 923 | H  | 0 | -4.112  | 18.910 | 0.046  |
| H      |     |    |   |         |        |        |
| HETATM | 924 | Zn | 0 | -14.899 | 5.588  | -0.280 |
| Zn     |     |    |   |         |        |        |
| HETATM | 925 | S  | 0 | -19.357 | 4.886  | -1.143 |
| S      |     |    |   |         |        |        |
| HETATM | 926 | S  | 0 | -13.831 | 2.949  | -4.208 |
| S      |     |    |   |         |        |        |
| HETATM | 927 | N  | 0 | -15.916 | 6.833  | -1.781 |
| N      |     |    |   |         |        |        |
| HETATM | 928 | N  | 0 | -16.951 | 4.794  | -0.344 |
| N      |     |    |   |         |        |        |
| HETATM | 929 | N  | 0 | -17.577 | 3.777  | 0.326  |
| N      |     |    |   |         |        |        |
| HETATM | 930 | N  | 0 | -14.368 | 4.284  | -1.825 |
| N      |     |    |   |         |        |        |
| HETATM | 931 | C  | 0 | -15.376 | 7.807  | -2.499 |
| C      |     |    |   |         |        |        |
| HETATM | 932 | H  | 0 | -14.449 | 7.984  | -2.399 |
| H      |     |    |   |         |        |        |
| HETATM | 933 | C  | 0 | -14.158 | 3.728  | -2.821 |
| C      |     |    |   |         |        |        |
| HETATM | 934 | C  | 0 | -16.104 | 8.577  | -3.388 |
| C      |     |    |   |         |        |        |

|        |     |   |   |         |        |        |
|--------|-----|---|---|---------|--------|--------|
| HETATM | 935 | H | 0 | -15.679 | 9.267  | -3.883 |
| H      |     |   |   |         |        |        |
| HETATM | 936 | C | 0 | -17.438 | 8.337  | -3.548 |
| C      |     |   |   |         |        |        |
| HETATM | 937 | H | 0 | -17.954 | 8.865  | -4.147 |
| H      |     |   |   |         |        |        |
| HETATM | 938 | C | 0 | -18.029 | 7.312  | -2.826 |
| C      |     |   |   |         |        |        |
| HETATM | 939 | H | 0 | -18.954 | 7.120  | -2.924 |
| H      |     |   |   |         |        |        |
| HETATM | 940 | C | 0 | -17.238 | 6.572  | -1.953 |
| C      |     |   |   |         |        |        |
| HETATM | 941 | C | 0 | -17.738 | 5.467  | -1.148 |
| C      |     |   |   |         |        |        |
| HETATM | 942 | C | 0 | -18.856 | 3.704  | 0.018  |
| C      |     |   |   |         |        |        |
| HETATM | 943 | C | 0 | -19.792 | 2.737  | 0.610  |
| C      |     |   |   |         |        |        |
| HETATM | 944 | C | 0 | -19.314 | 1.684  | 1.415  |
| C      |     |   |   |         |        |        |
| HETATM | 945 | H | 0 | -18.381 | 1.588  | 1.560  |
| H      |     |   |   |         |        |        |
| HETATM | 946 | C | 0 | -20.179 | 0.810  | 1.980  |
| C      |     |   |   |         |        |        |
| HETATM | 947 | H | 0 | -19.840 | 0.087  | 2.493  |
| H      |     |   |   |         |        |        |
| HETATM | 948 | C | 0 | -21.599 | 0.953  | 1.820  |
| C      |     |   |   |         |        |        |
| HETATM | 949 | C | 0 | -22.511 | 0.087  | 2.422  |
| C      |     |   |   |         |        |        |
| HETATM | 950 | H | 0 | -22.194 | -0.624 | 2.968  |
| H      |     |   |   |         |        |        |
| HETATM | 951 | C | 0 | -23.865 | 0.251  | 2.233  |
| C      |     |   |   |         |        |        |
| HETATM | 952 | H | 0 | -24.477 | -0.357 | 2.633  |
| H      |     |   |   |         |        |        |
| HETATM | 953 | C | 0 | -24.341 | 1.302  | 1.464  |
| C      |     |   |   |         |        |        |
| HETATM | 954 | H | 0 | -25.276 | 1.417  | 1.353  |
| H      |     |   |   |         |        |        |
| HETATM | 955 | C | 0 | -23.473 | 2.180  | 0.857  |
| C      |     |   |   |         |        |        |
| HETATM | 956 | H | 0 | -23.809 | 2.896  | 0.331  |
| H      |     |   |   |         |        |        |
| HETATM | 957 | C | 0 | -22.063 | 2.011  | 1.022  |
| C      |     |   |   |         |        |        |
| HETATM | 958 | C | 0 | -21.150 | 2.885  | 0.416  |
| C      |     |   |   |         |        |        |
| HETATM | 959 | H | 0 | -21.471 | 3.589  | -0.136 |
| H      |     |   |   |         |        |        |
| HETATM | 960 | S | 0 | -10.441 | 6.290  | 0.582  |
| S      |     |   |   |         |        |        |
| HETATM | 961 | S | 0 | -15.966 | 8.227  | 3.648  |
| S      |     |   |   |         |        |        |
| HETATM | 962 | N | 0 | -13.882 | 4.342  | 1.220  |
| N      |     |   |   |         |        |        |

|        |     |   |   |         |        |        |
|--------|-----|---|---|---------|--------|--------|
| HETATM | 963 | N | 0 | -12.846 | 6.380  | -0.217 |
| N      |     |   |   |         |        |        |
| HETATM | 964 | N | 0 | -12.219 | 7.398  | -0.887 |
| N      |     |   |   |         |        |        |
| HETATM | 965 | N | 0 | -15.430 | 6.892  | 1.264  |
| N      |     |   |   |         |        |        |
| HETATM | 966 | C | 0 | -14.420 | 3.369  | 1.938  |
| C      |     |   |   |         |        |        |
| HETATM | 967 | H | 0 | -15.348 | 3.192  | 1.839  |
| H      |     |   |   |         |        |        |
| HETATM | 968 | C | 0 | -15.639 | 7.447  | 2.260  |
| C      |     |   |   |         |        |        |
| HETATM | 969 | C | 0 | -13.693 | 2.599  | 2.827  |
| C      |     |   |   |         |        |        |
| HETATM | 970 | H | 0 | -14.119 | 1.908  | 3.321  |
| H      |     |   |   |         |        |        |
| HETATM | 971 | C | 0 | -12.359 | 2.838  | 2.988  |
| C      |     |   |   |         |        |        |
| HETATM | 972 | H | 0 | -11.843 | 2.311  | 3.586  |
| H      |     |   |   |         |        |        |
| HETATM | 973 | C | 0 | -11.768 | 3.862  | 2.264  |
| C      |     |   |   |         |        |        |
| HETATM | 974 | H | 0 | -10.843 | 4.056  | 2.363  |
| H      |     |   |   |         |        |        |
| HETATM | 975 | C | 0 | -12.559 | 4.602  | 1.392  |
| C      |     |   |   |         |        |        |
| HETATM | 976 | C | 0 | -12.058 | 5.709  | 0.587  |
| C      |     |   |   |         |        |        |
| HETATM | 977 | C | 0 | -10.941 | 7.472  | -0.579 |
| C      |     |   |   |         |        |        |
| HETATM | 978 | C | 0 | -10.006 | 8.438  | -1.172 |
| C      |     |   |   |         |        |        |
| HETATM | 979 | C | 0 | -10.483 | 9.491  | -1.975 |
| C      |     |   |   |         |        |        |
| HETATM | 980 | H | 0 | -11.417 | 9.588  | -2.120 |
| H      |     |   |   |         |        |        |
| HETATM | 981 | C | 0 | -9.617  | 10.366 | -2.540 |
| C      |     |   |   |         |        |        |
| HETATM | 982 | H | 0 | -9.958  | 11.089 | -3.055 |
| H      |     |   |   |         |        |        |
| HETATM | 983 | C | 0 | -8.198  | 10.221 | -2.382 |
| C      |     |   |   |         |        |        |
| HETATM | 984 | C | 0 | -7.286  | 11.089 | -2.983 |
| C      |     |   |   |         |        |        |
| HETATM | 985 | H | 0 | -7.603  | 11.800 | -3.528 |
| H      |     |   |   |         |        |        |
| HETATM | 986 | C | 0 | -5.932  | 10.924 | -2.794 |
| C      |     |   |   |         |        |        |
| HETATM | 987 | H | 0 | -5.321  | 11.533 | -3.194 |
| H      |     |   |   |         |        |        |
| HETATM | 988 | C | 0 | -5.457  | 9.873  | -2.025 |
| C      |     |   |   |         |        |        |
| HETATM | 989 | H | 0 | -4.520  | 9.758  | -1.914 |
| H      |     |   |   |         |        |        |
| HETATM | 990 | C | 0 | -6.325  | 8.997  | -1.419 |
| C      |     |   |   |         |        |        |

|        |      |    |   |         |         |        |
|--------|------|----|---|---------|---------|--------|
| HETATM | 991  | H  | 0 | -5.989  | 8.281   | -0.892 |
| H      |      |    |   |         |         |        |
| HETATM | 992  | C  | 0 | -7.735  | 9.164   | -1.583 |
| C      |      |    |   |         |         |        |
| HETATM | 993  | C  | 0 | -8.647  | 8.290   | -0.977 |
| C      |      |    |   |         |         |        |
| HETATM | 994  | H  | 0 | -8.326  | 7.586   | -0.426 |
| H      |      |    |   |         |         |        |
| HETATM | 995  | Zn | 0 | -19.114 | -5.736  | -0.752 |
| Zn     |      |    |   |         |         |        |
| HETATM | 996  | S  | 0 | -23.571 | -6.438  | -1.614 |
| S      |      |    |   |         |         |        |
| HETATM | 997  | S  | 0 | -18.047 | -8.375  | -4.680 |
| S      |      |    |   |         |         |        |
| HETATM | 998  | N  | 0 | -20.131 | -4.491  | -2.253 |
| N      |      |    |   |         |         |        |
| HETATM | 999  | N  | 0 | -21.167 | -6.528  | -0.815 |
| N      |      |    |   |         |         |        |
| HETATM | 1000 | N  | 0 | -21.793 | -7.547  | -0.145 |
| N      |      |    |   |         |         |        |
| HETATM | 1001 | N  | 0 | -18.582 | -7.040  | -2.296 |
| N      |      |    |   |         |         |        |
| HETATM | 1002 | C  | 0 | -19.592 | -3.517  | -2.970 |
| C      |      |    |   |         |         |        |
| HETATM | 1003 | H  | 0 | -18.664 | -3.340  | -2.871 |
| H      |      |    |   |         |         |        |
| HETATM | 1004 | C  | 0 | -18.373 | -7.595  | -3.291 |
| C      |      |    |   |         |         |        |
| HETATM | 1005 | C  | 0 | -20.319 | -2.747  | -3.859 |
| C      |      |    |   |         |         |        |
| HETATM | 1006 | H  | 0 | -19.894 | -2.057  | -4.353 |
| H      |      |    |   |         |         |        |
| HETATM | 1007 | C  | 0 | -21.654 | -2.987  | -4.019 |
| C      |      |    |   |         |         |        |
| HETATM | 1008 | H  | 0 | -22.169 | -2.459  | -4.618 |
| H      |      |    |   |         |         |        |
| HETATM | 1009 | C  | 0 | -22.245 | -4.010  | -3.296 |
| C      |      |    |   |         |         |        |
| HETATM | 1010 | H  | 0 | -23.170 | -4.204  | -3.395 |
| H      |      |    |   |         |         |        |
| HETATM | 1011 | C  | 0 | -21.453 | -4.750  | -2.424 |
| C      |      |    |   |         |         |        |
| HETATM | 1012 | C  | 0 | -21.954 | -5.857  | -1.619 |
| C      |      |    |   |         |         |        |
| HETATM | 1013 | C  | 0 | -23.071 | -7.621  | -0.453 |
| C      |      |    |   |         |         |        |
| HETATM | 1014 | C  | 0 | -24.008 | -8.587  | 0.140  |
| C      |      |    |   |         |         |        |
| HETATM | 1015 | C  | 0 | -23.530 | -9.639  | 0.943  |
| C      |      |    |   |         |         |        |
| HETATM | 1016 | H  | 0 | -22.596 | -9.736  | 1.088  |
| H      |      |    |   |         |         |        |
| HETATM | 1017 | C  | 0 | -24.395 | -10.514 | 1.509  |
| C      |      |    |   |         |         |        |
| HETATM | 1018 | H  | 0 | -24.054 | -11.237 | 2.023  |
| H      |      |    |   |         |         |        |



|        |      |   |   |         |         |        |
|--------|------|---|---|---------|---------|--------|
| HETATM | 1019 | C | 0 | -25.815 | -10.371 | 1.350  |
| C      |      |   |   |         |         |        |
| HETATM | 1020 | C | 0 | -26.727 | -11.237 | 1.951  |
| C      |      |   |   |         |         |        |
| HETATM | 1021 | H | 0 | -26.410 | -11.948 | 2.496  |
| H      |      |   |   |         |         |        |
| HETATM | 1022 | C | 0 | -28.081 | -11.073 | 1.763  |
| C      |      |   |   |         |         |        |
| HETATM | 1023 | H | 0 | -28.692 | -11.681 | 2.162  |
| H      |      |   |   |         |         |        |
| HETATM | 1024 | C | 0 | -28.556 | -10.022 | 0.993  |
| C      |      |   |   |         |         |        |
| HETATM | 1025 | H | 0 | -29.492 | -9.907  | 0.883  |
| H      |      |   |   |         |         |        |
| HETATM | 1026 | C | 0 | -27.688 | -9.145  | 0.387  |
| C      |      |   |   |         |         |        |
| HETATM | 1027 | H | 0 | -28.025 | -8.428  | -0.140 |
| H      |      |   |   |         |         |        |
| HETATM | 1028 | C | 0 | -26.278 | -9.313  | 0.551  |
| C      |      |   |   |         |         |        |
| HETATM | 1029 | C | 0 | -25.366 | -8.439  | -0.054 |
| C      |      |   |   |         |         |        |
| HETATM | 1030 | H | 0 | -25.686 | -7.734  | -0.606 |
| H      |      |   |   |         |         |        |
| HETATM | 1031 | S | 0 | -14.656 | -5.034  | 0.111  |
| S      |      |   |   |         |         |        |
| HETATM | 1032 | S | 0 | -20.181 | -3.097  | 3.176  |
| S      |      |   |   |         |         |        |
| HETATM | 1033 | N | 0 | -18.097 | -6.982  | 0.749  |
| N      |      |   |   |         |         |        |
| HETATM | 1034 | N | 0 | -17.061 | -4.943  | -0.688 |
| N      |      |   |   |         |         |        |
| HETATM | 1035 | N | 0 | -16.435 | -3.925  | -1.358 |
| N      |      |   |   |         |         |        |
| HETATM | 1036 | N | 0 | -19.645 | -4.432  | 0.793  |
| N      |      |   |   |         |         |        |
| HETATM | 1037 | C | 0 | -18.636 | -7.955  | 1.467  |
| C      |      |   |   |         |         |        |
| HETATM | 1038 | H | 0 | -19.564 | -8.132  | 1.367  |
| H      |      |   |   |         |         |        |
| HETATM | 1039 | C | 0 | -19.855 | -3.876  | 1.789  |
| C      |      |   |   |         |         |        |
| HETATM | 1040 | C | 0 | -17.909 | -8.725  | 2.356  |
| C      |      |   |   |         |         |        |
| HETATM | 1041 | H | 0 | -18.333 | -9.416  | 2.850  |
| H      |      |   |   |         |         |        |
| HETATM | 1042 | C | 0 | -16.574 | -8.485  | 2.516  |
| C      |      |   |   |         |         |        |
| HETATM | 1043 | H | 0 | -16.058 | -9.013  | 3.115  |
| H      |      |   |   |         |         |        |
| HETATM | 1044 | C | 0 | -15.984 | -7.462  | 1.794  |
| C      |      |   |   |         |         |        |
| HETATM | 1045 | H | 0 | -15.058 | -7.268  | 1.892  |
| H      |      |   |   |         |         |        |
| HETATM | 1046 | C | 0 | -16.775 | -6.721  | 0.921  |
| C      |      |   |   |         |         |        |

|        |      |   |   |         |        |        |
|--------|------|---|---|---------|--------|--------|
| HETATM | 1047 | C | 0 | -16.274 | -5.615 | 0.116  |
| C      |      |   |   |         |        |        |
| HETATM | 1048 | C | 0 | -15.156 | -3.852 | -1.050 |
| C      |      |   |   |         |        |        |
| HETATM | 1049 | C | 0 | -14.221 | -2.885 | -1.642 |
| C      |      |   |   |         |        |        |
| HETATM | 1050 | C | 0 | -14.698 | -1.833 | -2.446 |
| C      |      |   |   |         |        |        |
| HETATM | 1051 | H | 0 | -15.632 | -1.736 | -2.592 |
| H      |      |   |   |         |        |        |
| HETATM | 1052 | C | 0 | -13.833 | -0.958 | -3.012 |
| C      |      |   |   |         |        |        |
| HETATM | 1053 | H | 0 | -14.173 | -0.235 | -3.525 |
| H      |      |   |   |         |        |        |
| HETATM | 1054 | C | 0 | -12.414 | -1.102 | -2.852 |
| C      |      |   |   |         |        |        |
| HETATM | 1055 | C | 0 | -11.502 | -0.235 | -3.454 |
| C      |      |   |   |         |        |        |
| HETATM | 1056 | H | 0 | -11.818 | 0.476  | -4.000 |
| H      |      |   |   |         |        |        |
| HETATM | 1057 | C | 0 | -10.147 | -0.400 | -3.266 |
| C      |      |   |   |         |        |        |
| HETATM | 1058 | H | 0 | -9.536  | 0.209  | -3.665 |
| H      |      |   |   |         |        |        |
| HETATM | 1059 | C | 0 | -9.671  | -1.450 | -2.496 |
| C      |      |   |   |         |        |        |
| HETATM | 1060 | H | 0 | -8.736  | -1.565 | -2.385 |
| H      |      |   |   |         |        |        |
| HETATM | 1061 | C | 0 | -10.539 | -2.328 | -1.889 |
| C      |      |   |   |         |        |        |
| HETATM | 1062 | H | 0 | -10.204 | -3.044 | -1.363 |
| H      |      |   |   |         |        |        |
| HETATM | 1063 | C | 0 | -11.949 | -2.159 | -2.054 |
| C      |      |   |   |         |        |        |
| HETATM | 1064 | C | 0 | -12.862 | -3.033 | -1.448 |
| C      |      |   |   |         |        |        |
| HETATM | 1065 | H | 0 | -12.542 | -3.738 | -0.896 |
| H      |      |   |   |         |        |        |

END

|         |    |    |    |    |
|---------|----|----|----|----|
| CONNECT | 2  | 18 | 19 |    |
| CONNECT | 3  | 10 |    |    |
| CONNECT | 4  | 8  | 17 |    |
| CONNECT | 5  | 6  | 18 |    |
| CONNECT | 6  | 5  | 19 |    |
| CONNECT | 7  | 10 |    |    |
| CONNECT | 8  | 4  | 9  | 11 |
| CONNECT | 9  | 8  |    |    |
| CONNECT | 10 | 3  | 7  |    |
| CONNECT | 11 | 8  | 12 | 13 |
| CONNECT | 12 | 11 |    |    |
| CONNECT | 13 | 11 | 14 | 15 |
| CONNECT | 14 | 13 |    |    |
| CONNECT | 15 | 13 | 16 | 17 |
| CONNECT | 16 | 15 |    |    |
| CONNECT | 17 | 15 | 4  | 18 |
| CONNECT | 18 | 2  | 5  | 17 |
| CONNECT | 19 | 2  | 6  | 20 |

|        |    |    |    |    |
|--------|----|----|----|----|
| CONECT | 20 | 19 | 21 | 35 |
| CONECT | 21 | 20 | 22 | 23 |
| CONECT | 22 | 21 |    |    |
| CONECT | 23 | 21 | 24 | 25 |
| CONECT | 24 | 23 |    |    |
| CONECT | 25 | 23 | 26 | 34 |
| CONECT | 26 | 25 | 27 | 28 |
| CONECT | 27 | 26 |    |    |
| CONECT | 28 | 26 | 29 | 30 |
| CONECT | 29 | 28 |    |    |
| CONECT | 30 | 28 | 31 | 32 |
| CONECT | 31 | 30 |    |    |
| CONECT | 32 | 30 | 33 | 34 |
| CONECT | 33 | 32 |    |    |
| CONECT | 34 | 25 | 32 | 35 |
| CONECT | 35 | 20 | 34 | 36 |
| CONECT | 36 | 35 |    |    |
| CONECT | 37 | 53 | 54 |    |
| CONECT | 38 | 45 |    |    |
| CONECT | 39 | 43 | 52 |    |
| CONECT | 40 | 41 | 53 |    |
| CONECT | 41 | 40 | 54 |    |
| CONECT | 42 | 45 |    |    |
| CONECT | 43 | 39 | 44 | 46 |
| CONECT | 44 | 43 |    |    |
| CONECT | 45 | 42 | 38 |    |
| CONECT | 46 | 43 | 47 | 48 |
| CONECT | 47 | 46 |    |    |
| CONECT | 48 | 46 | 49 | 50 |
| CONECT | 49 | 48 |    |    |
| CONECT | 50 | 48 | 51 | 52 |
| CONECT | 51 | 50 |    |    |
| CONECT | 52 | 39 | 50 | 53 |
| CONECT | 53 | 40 | 52 | 37 |
| CONECT | 54 | 37 | 41 | 55 |
| CONECT | 55 | 54 | 56 | 70 |
| CONECT | 56 | 55 | 57 | 58 |
| CONECT | 57 | 56 |    |    |
| CONECT | 58 | 56 | 59 | 60 |
| CONECT | 59 | 58 |    |    |
| CONECT | 60 | 58 | 61 | 69 |
| CONECT | 61 | 60 | 62 | 63 |
| CONECT | 62 | 61 |    |    |
| CONECT | 63 | 61 | 64 | 65 |
| CONECT | 64 | 63 |    |    |
| CONECT | 65 | 63 | 66 | 67 |
| CONECT | 66 | 65 |    |    |
| CONECT | 67 | 65 | 68 | 69 |
| CONECT | 68 | 67 |    |    |
| CONECT | 69 | 60 | 67 | 70 |
| CONECT | 70 | 55 | 69 | 71 |
| CONECT | 71 | 70 |    |    |
| CONECT | 73 | 89 | 90 |    |
| CONECT | 74 | 81 |    |    |
| CONECT | 75 | 79 | 88 |    |
| CONECT | 76 | 77 | 89 |    |
| CONECT | 77 | 76 | 90 |    |

|         |     |     |     |     |
|---------|-----|-----|-----|-----|
| CONNECT | 78  | 81  |     |     |
| CONNECT | 79  | 75  | 80  | 82  |
| CONNECT | 80  | 79  |     |     |
| CONNECT | 81  | 78  | 74  |     |
| CONNECT | 82  | 79  | 83  | 84  |
| CONNECT | 83  | 82  |     |     |
| CONNECT | 84  | 82  | 85  | 86  |
| CONNECT | 85  | 84  |     |     |
| CONNECT | 86  | 84  | 87  | 88  |
| CONNECT | 87  | 86  |     |     |
| CONNECT | 88  | 86  | 75  | 89  |
| CONNECT | 89  | 73  | 76  | 88  |
| CONNECT | 90  | 73  | 77  | 91  |
| CONNECT | 91  | 90  | 92  | 106 |
| CONNECT | 92  | 91  | 93  | 94  |
| CONNECT | 93  | 92  |     |     |
| CONNECT | 94  | 92  | 95  | 96  |
| CONNECT | 95  | 94  |     |     |
| CONNECT | 96  | 94  | 97  | 105 |
| CONNECT | 97  | 96  | 98  | 99  |
| CONNECT | 98  | 97  |     |     |
| CONNECT | 99  | 97  | 100 | 101 |
| CONNECT | 100 | 99  |     |     |
| CONNECT | 101 | 99  | 102 | 103 |
| CONNECT | 102 | 101 |     |     |
| CONNECT | 103 | 101 | 104 | 105 |
| CONNECT | 104 | 103 |     |     |
| CONNECT | 105 | 96  | 103 | 106 |
| CONNECT | 106 | 105 | 91  | 107 |
| CONNECT | 107 | 106 |     |     |
| CONNECT | 108 | 124 | 125 |     |
| CONNECT | 109 | 116 |     |     |
| CONNECT | 110 | 114 | 123 |     |
| CONNECT | 111 | 112 | 124 |     |
| CONNECT | 112 | 111 | 125 |     |
| CONNECT | 113 | 116 |     |     |
| CONNECT | 114 | 110 | 115 | 117 |
| CONNECT | 115 | 114 |     |     |
| CONNECT | 116 | 109 | 113 |     |
| CONNECT | 117 | 114 | 118 | 119 |
| CONNECT | 118 | 117 |     |     |
| CONNECT | 119 | 117 | 120 | 121 |
| CONNECT | 120 | 119 |     |     |
| CONNECT | 121 | 119 | 122 | 123 |
| CONNECT | 122 | 121 |     |     |
| CONNECT | 123 | 110 | 121 | 124 |
| CONNECT | 124 | 108 | 111 | 123 |
| CONNECT | 125 | 108 | 112 | 126 |
| CONNECT | 126 | 125 | 127 | 141 |
| CONNECT | 127 | 126 | 128 | 129 |
| CONNECT | 128 | 127 |     |     |
| CONNECT | 129 | 127 | 130 | 131 |
| CONNECT | 130 | 129 |     |     |
| CONNECT | 131 | 129 | 132 | 140 |
| CONNECT | 132 | 131 | 133 | 134 |
| CONNECT | 133 | 132 |     |     |
| CONNECT | 134 | 132 | 135 | 136 |

|         |     |     |     |     |
|---------|-----|-----|-----|-----|
| CONNECT | 135 | 134 |     |     |
| CONNECT | 136 | 134 | 137 | 138 |
| CONNECT | 137 | 136 |     |     |
| CONNECT | 138 | 136 | 139 | 140 |
| CONNECT | 139 | 138 |     |     |
| CONNECT | 140 | 138 | 131 | 141 |
| CONNECT | 141 | 126 | 140 | 142 |
| CONNECT | 142 | 141 |     |     |
| CONNECT | 144 | 160 | 161 |     |
| CONNECT | 145 | 152 |     |     |
| CONNECT | 146 | 150 | 159 |     |
| CONNECT | 147 | 148 | 160 |     |
| CONNECT | 148 | 147 | 161 |     |
| CONNECT | 149 | 152 |     |     |
| CONNECT | 150 | 146 | 151 | 153 |
| CONNECT | 151 | 150 |     |     |
| CONNECT | 152 | 145 | 149 |     |
| CONNECT | 153 | 150 | 154 | 155 |
| CONNECT | 154 | 153 |     |     |
| CONNECT | 155 | 153 | 156 | 157 |
| CONNECT | 156 | 155 |     |     |
| CONNECT | 157 | 155 | 158 | 159 |
| CONNECT | 158 | 157 |     |     |
| CONNECT | 159 | 157 | 146 | 160 |
| CONNECT | 160 | 159 | 144 | 147 |
| CONNECT | 161 | 144 | 148 | 162 |
| CONNECT | 162 | 161 | 163 | 177 |
| CONNECT | 163 | 162 | 164 | 165 |
| CONNECT | 164 | 163 |     |     |
| CONNECT | 165 | 163 | 166 | 167 |
| CONNECT | 166 | 165 |     |     |
| CONNECT | 167 | 165 | 168 | 176 |
| CONNECT | 168 | 167 | 169 | 170 |
| CONNECT | 169 | 168 |     |     |
| CONNECT | 170 | 168 | 171 | 172 |
| CONNECT | 171 | 170 |     |     |
| CONNECT | 172 | 170 | 173 | 174 |
| CONNECT | 173 | 172 |     |     |
| CONNECT | 174 | 172 | 175 | 176 |
| CONNECT | 175 | 174 |     |     |
| CONNECT | 176 | 174 | 167 | 177 |
| CONNECT | 177 | 176 | 162 | 178 |
| CONNECT | 178 | 177 |     |     |
| CONNECT | 179 | 195 | 196 |     |
| CONNECT | 180 | 187 |     |     |
| CONNECT | 181 | 185 | 194 |     |
| CONNECT | 182 | 183 | 195 |     |
| CONNECT | 183 | 182 | 196 |     |
| CONNECT | 184 | 187 |     |     |
| CONNECT | 185 | 181 | 186 | 188 |
| CONNECT | 186 | 185 |     |     |
| CONNECT | 187 | 180 | 184 |     |
| CONNECT | 188 | 185 | 189 | 190 |
| CONNECT | 189 | 188 |     |     |
| CONNECT | 190 | 188 | 191 | 192 |
| CONNECT | 191 | 190 |     |     |
| CONNECT | 192 | 190 | 193 | 194 |

|        |     |     |     |     |
|--------|-----|-----|-----|-----|
| CONECT | 193 | 192 |     |     |
| CONECT | 194 | 181 | 192 | 195 |
| CONECT | 195 | 179 | 182 | 194 |
| CONECT | 196 | 179 | 183 | 197 |
| CONECT | 197 | 196 | 198 | 212 |
| CONECT | 198 | 197 | 199 | 200 |
| CONECT | 199 | 198 |     |     |
| CONECT | 200 | 198 | 201 | 202 |
| CONECT | 201 | 200 |     |     |
| CONECT | 202 | 200 | 203 | 211 |
| CONECT | 203 | 202 | 204 | 205 |
| CONECT | 204 | 203 |     |     |
| CONECT | 205 | 203 | 206 | 207 |
| CONECT | 206 | 205 |     |     |
| CONECT | 207 | 205 | 208 | 209 |
| CONECT | 208 | 207 |     |     |
| CONECT | 209 | 207 | 210 | 211 |
| CONECT | 210 | 209 |     |     |
| CONECT | 211 | 202 | 209 | 212 |
| CONECT | 212 | 197 | 211 | 213 |
| CONECT | 213 | 212 |     |     |
| CONECT | 215 | 231 | 232 |     |
| CONECT | 216 | 223 |     |     |
| CONECT | 217 | 221 | 230 |     |
| CONECT | 218 | 219 | 231 |     |
| CONECT | 219 | 218 | 232 |     |
| CONECT | 220 | 223 |     |     |
| CONECT | 221 | 217 | 222 | 224 |
| CONECT | 222 | 221 |     |     |
| CONECT | 223 | 216 | 220 |     |
| CONECT | 224 | 221 | 225 | 226 |
| CONECT | 225 | 224 |     |     |
| CONECT | 226 | 224 | 227 | 228 |
| CONECT | 227 | 226 |     |     |
| CONECT | 228 | 226 | 229 | 230 |
| CONECT | 229 | 228 |     |     |
| CONECT | 230 | 228 | 217 | 231 |
| CONECT | 231 | 215 | 230 | 218 |
| CONECT | 232 | 215 | 219 | 233 |
| CONECT | 233 | 232 | 234 | 248 |
| CONECT | 234 | 233 | 235 | 236 |
| CONECT | 235 | 234 |     |     |
| CONECT | 236 | 234 | 237 | 238 |
| CONECT | 237 | 236 |     |     |
| CONECT | 238 | 236 | 239 | 247 |
| CONECT | 239 | 238 | 240 | 241 |
| CONECT | 240 | 239 |     |     |
| CONECT | 241 | 239 | 242 | 243 |
| CONECT | 242 | 241 |     |     |
| CONECT | 243 | 241 | 244 | 245 |
| CONECT | 244 | 243 |     |     |
| CONECT | 245 | 243 | 246 | 247 |
| CONECT | 246 | 245 |     |     |
| CONECT | 247 | 245 | 238 | 248 |
| CONECT | 248 | 233 | 247 | 249 |
| CONECT | 249 | 248 |     |     |
| CONECT | 250 | 266 | 267 |     |

|        |     |     |     |     |
|--------|-----|-----|-----|-----|
| CONECT | 251 | 258 |     |     |
| CONECT | 252 | 256 | 265 |     |
| CONECT | 253 | 254 | 266 |     |
| CONECT | 254 | 253 | 267 |     |
| CONECT | 255 | 258 |     |     |
| CONECT | 256 | 252 | 257 | 259 |
| CONECT | 257 | 256 |     |     |
| CONECT | 258 | 255 | 251 |     |
| CONECT | 259 | 256 | 260 | 261 |
| CONECT | 260 | 259 |     |     |
| CONECT | 261 | 259 | 262 | 263 |
| CONECT | 262 | 261 |     |     |
| CONECT | 263 | 261 | 264 | 265 |
| CONECT | 264 | 263 |     |     |
| CONECT | 265 | 252 | 263 | 266 |
| CONECT | 266 | 253 | 265 | 250 |
| CONECT | 267 | 254 | 250 | 268 |
| CONECT | 268 | 267 | 269 | 283 |
| CONECT | 269 | 268 | 270 | 271 |
| CONECT | 270 | 269 |     |     |
| CONECT | 271 | 269 | 272 | 273 |
| CONECT | 272 | 271 |     |     |
| CONECT | 273 | 271 | 274 | 282 |
| CONECT | 274 | 273 | 275 | 276 |
| CONECT | 275 | 274 |     |     |
| CONECT | 276 | 274 | 277 | 278 |
| CONECT | 277 | 276 |     |     |
| CONECT | 278 | 276 | 279 | 280 |
| CONECT | 279 | 278 |     |     |
| CONECT | 280 | 278 | 281 | 282 |
| CONECT | 281 | 280 |     |     |
| CONECT | 282 | 273 | 280 | 283 |
| CONECT | 283 | 268 | 282 | 284 |
| CONECT | 284 | 283 |     |     |
| CONECT | 286 | 302 | 303 |     |
| CONECT | 287 | 294 |     |     |
| CONECT | 288 | 292 | 301 |     |
| CONECT | 289 | 290 | 302 |     |
| CONECT | 290 | 289 | 303 |     |
| CONECT | 291 | 294 |     |     |
| CONECT | 292 | 288 | 293 | 295 |
| CONECT | 293 | 292 |     |     |
| CONECT | 294 | 287 | 291 |     |
| CONECT | 295 | 292 | 296 | 297 |
| CONECT | 296 | 295 |     |     |
| CONECT | 297 | 295 | 298 | 299 |
| CONECT | 298 | 297 |     |     |
| CONECT | 299 | 297 | 300 | 301 |
| CONECT | 300 | 299 |     |     |
| CONECT | 301 | 299 | 288 | 302 |
| CONECT | 302 | 286 | 289 | 301 |
| CONECT | 303 | 286 | 290 | 304 |
| CONECT | 304 | 303 | 305 | 319 |
| CONECT | 305 | 304 | 306 | 307 |
| CONECT | 306 | 305 |     |     |
| CONECT | 307 | 305 | 308 | 309 |
| CONECT | 308 | 307 |     |     |

|         |     |     |     |     |
|---------|-----|-----|-----|-----|
| CONNECT | 309 | 307 | 310 | 318 |
| CONNECT | 310 | 309 | 311 | 312 |
| CONNECT | 311 | 310 |     |     |
| CONNECT | 312 | 310 | 313 | 314 |
| CONNECT | 313 | 312 |     |     |
| CONNECT | 314 | 312 | 315 | 316 |
| CONNECT | 315 | 314 |     |     |
| CONNECT | 316 | 314 | 317 | 318 |
| CONNECT | 317 | 316 |     |     |
| CONNECT | 318 | 309 | 316 | 319 |
| CONNECT | 319 | 304 | 318 | 320 |
| CONNECT | 320 | 319 |     |     |
| CONNECT | 321 | 337 | 338 |     |
| CONNECT | 322 | 329 |     |     |
| CONNECT | 323 | 327 | 336 |     |
| CONNECT | 324 | 325 | 337 |     |
| CONNECT | 325 | 324 | 338 |     |
| CONNECT | 326 | 329 |     |     |
| CONNECT | 327 | 323 | 328 | 330 |
| CONNECT | 328 | 327 |     |     |
| CONNECT | 329 | 322 | 326 |     |
| CONNECT | 330 | 327 | 331 | 332 |
| CONNECT | 331 | 330 |     |     |
| CONNECT | 332 | 330 | 333 | 334 |
| CONNECT | 333 | 332 |     |     |
| CONNECT | 334 | 332 | 335 | 336 |
| CONNECT | 335 | 334 |     |     |
| CONNECT | 336 | 323 | 334 | 337 |
| CONNECT | 337 | 324 | 336 | 321 |
| CONNECT | 338 | 321 | 325 | 339 |
| CONNECT | 339 | 338 | 340 | 354 |
| CONNECT | 340 | 339 | 341 | 342 |
| CONNECT | 341 | 340 |     |     |
| CONNECT | 342 | 340 | 343 | 344 |
| CONNECT | 343 | 342 |     |     |
| CONNECT | 344 | 342 | 345 | 353 |
| CONNECT | 345 | 344 | 346 | 347 |
| CONNECT | 346 | 345 |     |     |
| CONNECT | 347 | 345 | 348 | 349 |
| CONNECT | 348 | 347 |     |     |
| CONNECT | 349 | 347 | 350 | 351 |
| CONNECT | 350 | 349 |     |     |
| CONNECT | 351 | 349 | 352 | 353 |
| CONNECT | 352 | 351 |     |     |
| CONNECT | 353 | 344 | 351 | 354 |
| CONNECT | 354 | 339 | 353 | 355 |
| CONNECT | 355 | 354 |     |     |
| CONNECT | 357 | 373 | 374 |     |
| CONNECT | 358 | 365 |     |     |
| CONNECT | 359 | 363 | 372 |     |
| CONNECT | 360 | 361 | 373 |     |
| CONNECT | 361 | 360 | 374 |     |
| CONNECT | 362 | 365 |     |     |
| CONNECT | 363 | 359 | 364 | 366 |
| CONNECT | 364 | 363 |     |     |
| CONNECT | 365 | 358 | 362 |     |
| CONNECT | 366 | 363 | 367 | 368 |



|         |     |     |     |     |
|---------|-----|-----|-----|-----|
| CONNECT | 367 | 366 |     |     |
| CONNECT | 368 | 366 | 369 | 370 |
| CONNECT | 369 | 368 |     |     |
| CONNECT | 370 | 368 | 371 | 372 |
| CONNECT | 371 | 370 |     |     |
| CONNECT | 372 | 359 | 370 | 373 |
| CONNECT | 373 | 357 | 360 | 372 |
| CONNECT | 374 | 357 | 361 | 375 |
| CONNECT | 375 | 374 | 376 | 390 |
| CONNECT | 376 | 375 | 377 | 378 |
| CONNECT | 377 | 376 |     |     |
| CONNECT | 378 | 376 | 379 | 380 |
| CONNECT | 379 | 378 |     |     |
| CONNECT | 380 | 378 | 381 | 389 |
| CONNECT | 381 | 380 | 382 | 383 |
| CONNECT | 382 | 381 |     |     |
| CONNECT | 383 | 381 | 384 | 385 |
| CONNECT | 384 | 383 |     |     |
| CONNECT | 385 | 383 | 386 | 387 |
| CONNECT | 386 | 385 |     |     |
| CONNECT | 387 | 385 | 388 | 389 |
| CONNECT | 388 | 387 |     |     |
| CONNECT | 389 | 380 | 387 | 390 |
| CONNECT | 390 | 389 | 375 | 391 |
| CONNECT | 391 | 390 |     |     |
| CONNECT | 392 | 408 | 409 |     |
| CONNECT | 393 | 400 |     |     |
| CONNECT | 394 | 398 | 407 |     |
| CONNECT | 395 | 396 | 408 |     |
| CONNECT | 396 | 395 | 409 |     |
| CONNECT | 397 | 400 |     |     |
| CONNECT | 398 | 394 | 399 | 401 |
| CONNECT | 399 | 398 |     |     |
| CONNECT | 400 | 393 | 397 |     |
| CONNECT | 401 | 398 | 402 | 403 |
| CONNECT | 402 | 401 |     |     |
| CONNECT | 403 | 401 | 404 | 405 |
| CONNECT | 404 | 403 |     |     |
| CONNECT | 405 | 403 | 406 | 407 |
| CONNECT | 406 | 405 |     |     |
| CONNECT | 407 | 394 | 405 | 408 |
| CONNECT | 408 | 407 | 392 | 395 |
| CONNECT | 409 | 392 | 396 | 410 |
| CONNECT | 410 | 409 | 411 | 425 |
| CONNECT | 411 | 410 | 412 | 413 |
| CONNECT | 412 | 411 |     |     |
| CONNECT | 413 | 411 | 414 | 415 |
| CONNECT | 414 | 413 |     |     |
| CONNECT | 415 | 413 | 416 | 424 |
| CONNECT | 416 | 415 | 417 | 418 |
| CONNECT | 417 | 416 |     |     |
| CONNECT | 418 | 416 | 419 | 420 |
| CONNECT | 419 | 418 |     |     |
| CONNECT | 420 | 418 | 421 | 422 |
| CONNECT | 421 | 420 |     |     |
| CONNECT | 422 | 420 | 423 | 424 |
| CONNECT | 423 | 422 |     |     |

|         |     |     |     |     |
|---------|-----|-----|-----|-----|
| CONNECT | 424 | 415 | 422 | 425 |
| CONNECT | 425 | 410 | 424 | 426 |
| CONNECT | 426 | 425 |     |     |
| CONNECT | 428 | 444 | 445 |     |
| CONNECT | 429 | 436 |     |     |
| CONNECT | 430 | 434 | 443 |     |
| CONNECT | 431 | 432 | 444 |     |
| CONNECT | 432 | 431 | 445 |     |
| CONNECT | 433 | 436 |     |     |
| CONNECT | 434 | 430 | 435 | 437 |
| CONNECT | 435 | 434 |     |     |
| CONNECT | 436 | 429 | 433 |     |
| CONNECT | 437 | 434 | 438 | 439 |
| CONNECT | 438 | 437 |     |     |
| CONNECT | 439 | 437 | 440 | 441 |
| CONNECT | 440 | 439 |     |     |
| CONNECT | 441 | 439 | 442 | 443 |
| CONNECT | 442 | 441 |     |     |
| CONNECT | 443 | 441 | 430 | 444 |
| CONNECT | 444 | 428 | 431 | 443 |
| CONNECT | 445 | 432 | 428 | 446 |
| CONNECT | 446 | 445 | 447 | 461 |
| CONNECT | 447 | 446 | 448 | 449 |
| CONNECT | 448 | 447 |     |     |
| CONNECT | 449 | 447 | 450 | 451 |
| CONNECT | 450 | 449 |     |     |
| CONNECT | 451 | 449 | 452 | 460 |
| CONNECT | 452 | 451 | 453 | 454 |
| CONNECT | 453 | 452 |     |     |
| CONNECT | 454 | 452 | 455 | 456 |
| CONNECT | 455 | 454 |     |     |
| CONNECT | 456 | 454 | 457 | 458 |
| CONNECT | 457 | 456 |     |     |
| CONNECT | 458 | 456 | 459 | 460 |
| CONNECT | 459 | 458 |     |     |
| CONNECT | 460 | 458 | 451 | 461 |
| CONNECT | 461 | 460 | 446 | 462 |
| CONNECT | 462 | 461 |     |     |
| CONNECT | 463 | 479 | 480 |     |
| CONNECT | 464 | 471 |     |     |
| CONNECT | 465 | 469 | 478 |     |
| CONNECT | 466 | 467 | 479 |     |
| CONNECT | 467 | 466 | 480 |     |
| CONNECT | 468 | 471 |     |     |
| CONNECT | 469 | 465 | 470 | 472 |
| CONNECT | 470 | 469 |     |     |
| CONNECT | 471 | 464 | 468 |     |
| CONNECT | 472 | 469 | 473 | 474 |
| CONNECT | 473 | 472 |     |     |
| CONNECT | 474 | 472 | 475 | 476 |
| CONNECT | 475 | 474 |     |     |
| CONNECT | 476 | 474 | 477 | 478 |
| CONNECT | 477 | 476 |     |     |
| CONNECT | 478 | 476 | 465 | 479 |
| CONNECT | 479 | 463 | 466 | 478 |
| CONNECT | 480 | 463 | 467 | 481 |
| CONNECT | 481 | 480 | 482 | 496 |

|        |     |     |     |     |
|--------|-----|-----|-----|-----|
| CONECT | 482 | 481 | 483 | 484 |
| CONECT | 483 | 482 |     |     |
| CONECT | 484 | 482 | 485 | 486 |
| CONECT | 485 | 484 |     |     |
| CONECT | 486 | 484 | 487 | 495 |
| CONECT | 487 | 486 | 488 | 489 |
| CONECT | 488 | 487 |     |     |
| CONECT | 489 | 487 | 490 | 491 |
| CONECT | 490 | 489 |     |     |
| CONECT | 491 | 489 | 492 | 493 |
| CONECT | 492 | 491 |     |     |
| CONECT | 493 | 491 | 494 | 495 |
| CONECT | 494 | 493 |     |     |
| CONECT | 495 | 493 | 486 | 496 |
| CONECT | 496 | 481 | 495 | 497 |
| CONECT | 497 | 496 |     |     |
| CONECT | 498 | 504 | 539 |     |
| CONECT | 499 | 515 | 516 |     |
| CONECT | 500 | 507 |     |     |
| CONECT | 501 | 505 | 514 |     |
| CONECT | 502 | 503 | 515 |     |
| CONECT | 503 | 502 | 516 |     |
| CONECT | 504 | 498 | 507 |     |
| CONECT | 505 | 501 | 506 | 508 |
| CONECT | 506 | 505 |     |     |
| CONECT | 507 | 500 | 504 |     |
| CONECT | 508 | 505 | 509 | 510 |
| CONECT | 509 | 508 |     |     |
| CONECT | 510 | 508 | 511 | 512 |
| CONECT | 511 | 510 |     |     |
| CONECT | 512 | 510 | 513 | 514 |
| CONECT | 513 | 512 |     |     |
| CONECT | 514 | 512 | 501 | 515 |
| CONECT | 515 | 499 | 502 | 514 |
| CONECT | 516 | 499 | 503 | 517 |
| CONECT | 517 | 516 | 518 | 532 |
| CONECT | 518 | 517 | 519 | 520 |
| CONECT | 519 | 518 |     |     |
| CONECT | 520 | 518 | 521 | 522 |
| CONECT | 521 | 520 |     |     |
| CONECT | 522 | 520 | 523 | 531 |
| CONECT | 523 | 522 | 524 | 525 |
| CONECT | 524 | 523 |     |     |
| CONECT | 525 | 523 | 526 | 527 |
| CONECT | 526 | 525 |     |     |
| CONECT | 527 | 525 | 528 | 529 |
| CONECT | 528 | 527 |     |     |
| CONECT | 529 | 527 | 530 | 531 |
| CONECT | 530 | 529 |     |     |
| CONECT | 531 | 529 | 522 | 532 |
| CONECT | 532 | 517 | 531 | 533 |
| CONECT | 533 | 532 |     |     |
| CONECT | 534 | 550 | 551 |     |
| CONECT | 535 | 542 |     |     |
| CONECT | 536 | 540 | 549 |     |
| CONECT | 537 | 538 | 550 |     |
| CONECT | 538 | 537 | 551 |     |

|        |     |     |     |     |
|--------|-----|-----|-----|-----|
| CONECT | 539 | 498 | 542 |     |
| CONECT | 540 | 536 | 541 | 543 |
| CONECT | 541 | 540 |     |     |
| CONECT | 542 | 535 | 539 |     |
| CONECT | 543 | 540 | 544 | 545 |
| CONECT | 544 | 543 |     |     |
| CONECT | 545 | 543 | 546 | 547 |
| CONECT | 546 | 545 |     |     |
| CONECT | 547 | 545 | 548 | 549 |
| CONECT | 548 | 547 |     |     |
| CONECT | 549 | 536 | 547 | 550 |
| CONECT | 550 | 537 | 549 | 534 |
| CONECT | 551 | 538 | 534 | 552 |
| CONECT | 552 | 551 | 553 | 567 |
| CONECT | 553 | 552 | 554 | 555 |
| CONECT | 554 | 553 |     |     |
| CONECT | 555 | 553 | 556 | 557 |
| CONECT | 556 | 555 |     |     |
| CONECT | 557 | 555 | 558 | 566 |
| CONECT | 558 | 557 | 559 | 560 |
| CONECT | 559 | 558 |     |     |
| CONECT | 560 | 558 | 561 | 562 |
| CONECT | 561 | 560 |     |     |
| CONECT | 562 | 560 | 563 | 564 |
| CONECT | 563 | 562 |     |     |
| CONECT | 564 | 562 | 565 | 566 |
| CONECT | 565 | 564 |     |     |
| CONECT | 566 | 564 | 557 | 567 |
| CONECT | 567 | 552 | 566 | 568 |
| CONECT | 568 | 567 |     |     |
| CONECT | 570 | 586 | 587 |     |
| CONECT | 571 | 578 |     |     |
| CONECT | 572 | 576 | 585 |     |
| CONECT | 573 | 574 | 586 |     |
| CONECT | 574 | 573 | 587 |     |
| CONECT | 575 | 578 |     |     |
| CONECT | 576 | 572 | 577 | 579 |
| CONECT | 577 | 576 |     |     |
| CONECT | 578 | 571 | 575 |     |
| CONECT | 579 | 576 | 580 | 581 |
| CONECT | 580 | 579 |     |     |
| CONECT | 581 | 579 | 582 | 583 |
| CONECT | 582 | 581 |     |     |
| CONECT | 583 | 581 | 584 | 585 |
| CONECT | 584 | 583 |     |     |
| CONECT | 585 | 572 | 583 | 586 |
| CONECT | 586 | 570 | 585 | 573 |
| CONECT | 587 | 570 | 574 | 588 |
| CONECT | 588 | 587 | 589 | 603 |
| CONECT | 589 | 588 | 590 | 591 |
| CONECT | 590 | 589 |     |     |
| CONECT | 591 | 589 | 592 | 593 |
| CONECT | 592 | 591 |     |     |
| CONECT | 593 | 591 | 594 | 602 |
| CONECT | 594 | 593 | 595 | 596 |
| CONECT | 595 | 594 |     |     |
| CONECT | 596 | 594 | 597 | 598 |

|         |     |     |     |     |
|---------|-----|-----|-----|-----|
| CONNECT | 597 | 596 |     |     |
| CONNECT | 598 | 596 | 599 | 600 |
| CONNECT | 599 | 598 |     |     |
| CONNECT | 600 | 598 | 601 | 602 |
| CONNECT | 601 | 600 |     |     |
| CONNECT | 602 | 593 | 600 | 603 |
| CONNECT | 603 | 588 | 602 | 604 |
| CONNECT | 604 | 603 |     |     |
| CONNECT | 605 | 621 | 622 |     |
| CONNECT | 606 | 613 |     |     |
| CONNECT | 607 | 611 | 620 |     |
| CONNECT | 608 | 609 | 621 |     |
| CONNECT | 609 | 608 | 622 |     |
| CONNECT | 610 | 613 |     |     |
| CONNECT | 611 | 607 | 612 | 614 |
| CONNECT | 612 | 611 |     |     |
| CONNECT | 613 | 606 | 610 |     |
| CONNECT | 614 | 611 | 615 | 616 |
| CONNECT | 615 | 614 |     |     |
| CONNECT | 616 | 614 | 617 | 618 |
| CONNECT | 617 | 616 |     |     |
| CONNECT | 618 | 616 | 619 | 620 |
| CONNECT | 619 | 618 |     |     |
| CONNECT | 620 | 607 | 618 | 621 |
| CONNECT | 621 | 605 | 608 | 620 |
| CONNECT | 622 | 605 | 609 | 623 |
| CONNECT | 623 | 622 | 624 | 638 |
| CONNECT | 624 | 623 | 625 | 626 |
| CONNECT | 625 | 624 |     |     |
| CONNECT | 626 | 624 | 627 | 628 |
| CONNECT | 627 | 626 |     |     |
| CONNECT | 628 | 626 | 629 | 637 |
| CONNECT | 629 | 628 | 630 | 631 |
| CONNECT | 630 | 629 |     |     |
| CONNECT | 631 | 629 | 632 | 633 |
| CONNECT | 632 | 631 |     |     |
| CONNECT | 633 | 631 | 634 | 635 |
| CONNECT | 634 | 633 |     |     |
| CONNECT | 635 | 633 | 636 | 637 |
| CONNECT | 636 | 635 |     |     |
| CONNECT | 637 | 628 | 635 | 638 |
| CONNECT | 638 | 623 | 637 | 639 |
| CONNECT | 639 | 638 |     |     |
| CONNECT | 641 | 657 | 658 |     |
| CONNECT | 642 | 649 |     |     |
| CONNECT | 643 | 647 | 656 |     |
| CONNECT | 644 | 645 | 657 |     |
| CONNECT | 645 | 644 | 658 |     |
| CONNECT | 646 | 649 |     |     |
| CONNECT | 647 | 643 | 648 | 650 |
| CONNECT | 648 | 647 |     |     |
| CONNECT | 649 | 646 | 642 |     |
| CONNECT | 650 | 647 | 651 | 652 |
| CONNECT | 651 | 650 |     |     |
| CONNECT | 652 | 650 | 653 | 654 |
| CONNECT | 653 | 652 |     |     |
| CONNECT | 654 | 652 | 655 | 656 |

|         |     |     |     |     |
|---------|-----|-----|-----|-----|
| CONNECT | 655 | 654 |     |     |
| CONNECT | 656 | 654 | 643 | 657 |
| CONNECT | 657 | 641 | 644 | 656 |
| CONNECT | 658 | 641 | 645 | 659 |
| CONNECT | 659 | 658 | 660 | 674 |
| CONNECT | 660 | 659 | 661 | 662 |
| CONNECT | 661 | 660 |     |     |
| CONNECT | 662 | 660 | 663 | 664 |
| CONNECT | 663 | 662 |     |     |
| CONNECT | 664 | 662 | 665 | 673 |
| CONNECT | 665 | 664 | 666 | 667 |
| CONNECT | 666 | 665 |     |     |
| CONNECT | 667 | 665 | 668 | 669 |
| CONNECT | 668 | 667 |     |     |
| CONNECT | 669 | 667 | 670 | 671 |
| CONNECT | 670 | 669 |     |     |
| CONNECT | 671 | 669 | 672 | 673 |
| CONNECT | 672 | 671 |     |     |
| CONNECT | 673 | 664 | 671 | 674 |
| CONNECT | 674 | 673 | 659 | 675 |
| CONNECT | 675 | 674 |     |     |
| CONNECT | 676 | 692 | 693 |     |
| CONNECT | 677 | 684 |     |     |
| CONNECT | 678 | 682 | 691 |     |
| CONNECT | 679 | 680 | 692 |     |
| CONNECT | 680 | 679 | 693 |     |
| CONNECT | 681 | 684 |     |     |
| CONNECT | 682 | 678 | 683 | 685 |
| CONNECT | 683 | 682 |     |     |
| CONNECT | 684 | 681 | 677 |     |
| CONNECT | 685 | 682 | 686 | 687 |
| CONNECT | 686 | 685 |     |     |
| CONNECT | 687 | 685 | 688 | 689 |
| CONNECT | 688 | 687 |     |     |
| CONNECT | 689 | 687 | 690 | 691 |
| CONNECT | 690 | 689 |     |     |
| CONNECT | 691 | 678 | 689 | 692 |
| CONNECT | 692 | 676 | 679 | 691 |
| CONNECT | 693 | 676 | 680 | 694 |
| CONNECT | 694 | 693 | 695 | 709 |
| CONNECT | 695 | 694 | 696 | 697 |
| CONNECT | 696 | 695 |     |     |
| CONNECT | 697 | 695 | 698 | 699 |
| CONNECT | 698 | 697 |     |     |
| CONNECT | 699 | 697 | 700 | 708 |
| CONNECT | 700 | 699 | 701 | 702 |
| CONNECT | 701 | 700 |     |     |
| CONNECT | 702 | 700 | 703 | 704 |
| CONNECT | 703 | 702 |     |     |
| CONNECT | 704 | 702 | 705 | 706 |
| CONNECT | 705 | 704 |     |     |
| CONNECT | 706 | 704 | 707 | 708 |
| CONNECT | 707 | 706 |     |     |
| CONNECT | 708 | 699 | 706 | 709 |
| CONNECT | 709 | 694 | 708 | 710 |
| CONNECT | 710 | 709 |     |     |
| CONNECT | 712 | 728 | 729 |     |

|         |     |     |     |     |
|---------|-----|-----|-----|-----|
| CONNECT | 713 | 720 |     |     |
| CONNECT | 714 | 718 | 727 |     |
| CONNECT | 715 | 716 | 728 |     |
| CONNECT | 716 | 715 | 729 |     |
| CONNECT | 717 | 720 |     |     |
| CONNECT | 718 | 714 | 719 | 721 |
| CONNECT | 719 | 718 |     |     |
| CONNECT | 720 | 713 | 717 |     |
| CONNECT | 721 | 718 | 722 | 723 |
| CONNECT | 722 | 721 |     |     |
| CONNECT | 723 | 721 | 724 | 725 |
| CONNECT | 724 | 723 |     |     |
| CONNECT | 725 | 723 | 726 | 727 |
| CONNECT | 726 | 725 |     |     |
| CONNECT | 727 | 725 | 714 | 728 |
| CONNECT | 728 | 727 | 712 | 715 |
| CONNECT | 729 | 712 | 716 | 730 |
| CONNECT | 730 | 729 | 731 | 745 |
| CONNECT | 731 | 730 | 732 | 733 |
| CONNECT | 732 | 731 |     |     |
| CONNECT | 733 | 731 | 734 | 735 |
| CONNECT | 734 | 733 |     |     |
| CONNECT | 735 | 733 | 736 | 744 |
| CONNECT | 736 | 735 | 737 | 738 |
| CONNECT | 737 | 736 |     |     |
| CONNECT | 738 | 736 | 739 | 740 |
| CONNECT | 739 | 738 |     |     |
| CONNECT | 740 | 738 | 741 | 742 |
| CONNECT | 741 | 740 |     |     |
| CONNECT | 742 | 740 | 743 | 744 |
| CONNECT | 743 | 742 |     |     |
| CONNECT | 744 | 742 | 735 | 745 |
| CONNECT | 745 | 744 | 730 | 746 |
| CONNECT | 746 | 745 |     |     |
| CONNECT | 747 | 763 | 764 |     |
| CONNECT | 748 | 755 |     |     |
| CONNECT | 749 | 753 | 762 |     |
| CONNECT | 750 | 751 | 763 |     |
| CONNECT | 751 | 750 | 764 |     |
| CONNECT | 752 | 755 |     |     |
| CONNECT | 753 | 749 | 754 | 756 |
| CONNECT | 754 | 753 |     |     |
| CONNECT | 755 | 748 | 752 |     |
| CONNECT | 756 | 753 | 757 | 758 |
| CONNECT | 757 | 756 |     |     |
| CONNECT | 758 | 756 | 759 | 760 |
| CONNECT | 759 | 758 |     |     |
| CONNECT | 760 | 758 | 761 | 762 |
| CONNECT | 761 | 760 |     |     |
| CONNECT | 762 | 749 | 760 | 763 |
| CONNECT | 763 | 747 | 750 | 762 |
| CONNECT | 764 | 747 | 751 | 765 |
| CONNECT | 765 | 764 | 766 | 780 |
| CONNECT | 766 | 765 | 767 | 768 |
| CONNECT | 767 | 766 |     |     |
| CONNECT | 768 | 766 | 769 | 770 |
| CONNECT | 769 | 768 |     |     |

|         |     |     |     |     |
|---------|-----|-----|-----|-----|
| CONNECT | 770 | 768 | 771 | 779 |
| CONNECT | 771 | 770 | 772 | 773 |
| CONNECT | 772 | 771 |     |     |
| CONNECT | 773 | 771 | 774 | 775 |
| CONNECT | 774 | 773 |     |     |
| CONNECT | 775 | 773 | 776 | 777 |
| CONNECT | 776 | 775 |     |     |
| CONNECT | 777 | 775 | 778 | 779 |
| CONNECT | 778 | 777 |     |     |
| CONNECT | 779 | 770 | 777 | 780 |
| CONNECT | 780 | 765 | 779 | 781 |
| CONNECT | 781 | 780 |     |     |
| CONNECT | 783 | 799 | 800 |     |
| CONNECT | 784 | 791 |     |     |
| CONNECT | 785 | 789 | 798 |     |
| CONNECT | 786 | 787 | 799 |     |
| CONNECT | 787 | 786 | 800 |     |
| CONNECT | 788 | 791 |     |     |
| CONNECT | 789 | 785 | 790 | 792 |
| CONNECT | 790 | 789 |     |     |
| CONNECT | 791 | 784 | 788 |     |
| CONNECT | 792 | 789 | 793 | 794 |
| CONNECT | 793 | 792 |     |     |
| CONNECT | 794 | 792 | 795 | 796 |
| CONNECT | 795 | 794 |     |     |
| CONNECT | 796 | 794 | 797 | 798 |
| CONNECT | 797 | 796 |     |     |
| CONNECT | 798 | 796 | 785 | 799 |
| CONNECT | 799 | 783 | 786 | 798 |
| CONNECT | 800 | 783 | 787 | 801 |
| CONNECT | 801 | 800 | 802 | 816 |
| CONNECT | 802 | 801 | 803 | 804 |
| CONNECT | 803 | 802 |     |     |
| CONNECT | 804 | 802 | 805 | 806 |
| CONNECT | 805 | 804 |     |     |
| CONNECT | 806 | 804 | 807 | 815 |
| CONNECT | 807 | 806 | 808 | 809 |
| CONNECT | 808 | 807 |     |     |
| CONNECT | 809 | 807 | 810 | 811 |
| CONNECT | 810 | 809 |     |     |
| CONNECT | 811 | 809 | 812 | 813 |
| CONNECT | 812 | 811 |     |     |
| CONNECT | 813 | 811 | 814 | 815 |
| CONNECT | 814 | 813 |     |     |
| CONNECT | 815 | 806 | 813 | 816 |
| CONNECT | 816 | 801 | 815 | 817 |
| CONNECT | 817 | 816 |     |     |
| CONNECT | 818 | 834 | 835 |     |
| CONNECT | 819 | 826 |     |     |
| CONNECT | 820 | 824 | 833 |     |
| CONNECT | 821 | 822 | 834 |     |
| CONNECT | 822 | 821 | 835 |     |
| CONNECT | 823 | 826 |     |     |
| CONNECT | 824 | 820 | 825 | 827 |
| CONNECT | 825 | 824 |     |     |
| CONNECT | 826 | 819 | 823 |     |
| CONNECT | 827 | 824 | 828 | 829 |



|         |     |     |     |     |
|---------|-----|-----|-----|-----|
| CONNECT | 828 | 827 |     |     |
| CONNECT | 829 | 827 | 830 | 831 |
| CONNECT | 830 | 829 |     |     |
| CONNECT | 831 | 829 | 832 | 833 |
| CONNECT | 832 | 831 |     |     |
| CONNECT | 833 | 820 | 831 | 834 |
| CONNECT | 834 | 833 | 821 | 818 |
| CONNECT | 835 | 822 | 818 | 836 |
| CONNECT | 836 | 835 | 837 | 851 |
| CONNECT | 837 | 836 | 838 | 839 |
| CONNECT | 838 | 837 |     |     |
| CONNECT | 839 | 837 | 840 | 841 |
| CONNECT | 840 | 839 |     |     |
| CONNECT | 841 | 839 | 842 | 850 |
| CONNECT | 842 | 841 | 843 | 844 |
| CONNECT | 843 | 842 |     |     |
| CONNECT | 844 | 842 | 845 | 846 |
| CONNECT | 845 | 844 |     |     |
| CONNECT | 846 | 844 | 847 | 848 |
| CONNECT | 847 | 846 |     |     |
| CONNECT | 848 | 846 | 849 | 850 |
| CONNECT | 849 | 848 |     |     |
| CONNECT | 850 | 841 | 848 | 851 |
| CONNECT | 851 | 850 | 836 | 852 |
| CONNECT | 852 | 851 |     |     |
| CONNECT | 854 | 870 | 871 |     |
| CONNECT | 855 | 862 |     |     |
| CONNECT | 856 | 860 | 869 |     |
| CONNECT | 857 | 858 | 870 |     |
| CONNECT | 858 | 857 | 871 |     |
| CONNECT | 859 | 862 |     |     |
| CONNECT | 860 | 856 | 861 | 863 |
| CONNECT | 861 | 860 |     |     |
| CONNECT | 862 | 855 | 859 |     |
| CONNECT | 863 | 860 | 864 | 865 |
| CONNECT | 864 | 863 |     |     |
| CONNECT | 865 | 863 | 866 | 867 |
| CONNECT | 866 | 865 |     |     |
| CONNECT | 867 | 865 | 868 | 869 |
| CONNECT | 868 | 867 |     |     |
| CONNECT | 869 | 867 | 856 | 870 |
| CONNECT | 870 | 854 | 857 | 869 |
| CONNECT | 871 | 854 | 858 | 872 |
| CONNECT | 872 | 871 | 873 | 887 |
| CONNECT | 873 | 872 | 874 | 875 |
| CONNECT | 874 | 873 |     |     |
| CONNECT | 875 | 873 | 876 | 877 |
| CONNECT | 876 | 875 |     |     |
| CONNECT | 877 | 875 | 878 | 886 |
| CONNECT | 878 | 877 | 879 | 880 |
| CONNECT | 879 | 878 |     |     |
| CONNECT | 880 | 878 | 881 | 882 |
| CONNECT | 881 | 880 |     |     |
| CONNECT | 882 | 880 | 883 | 884 |
| CONNECT | 883 | 882 |     |     |
| CONNECT | 884 | 882 | 885 | 886 |
| CONNECT | 885 | 884 |     |     |

|         |     |     |     |     |
|---------|-----|-----|-----|-----|
| CONNECT | 886 | 877 | 884 | 887 |
| CONNECT | 887 | 872 | 886 | 888 |
| CONNECT | 888 | 887 |     |     |
| CONNECT | 889 | 905 | 906 |     |
| CONNECT | 890 | 897 |     |     |
| CONNECT | 891 | 895 | 904 |     |
| CONNECT | 892 | 893 | 905 |     |
| CONNECT | 893 | 892 | 906 |     |
| CONNECT | 894 | 897 |     |     |
| CONNECT | 895 | 891 | 896 | 898 |
| CONNECT | 896 | 895 |     |     |
| CONNECT | 897 | 890 | 894 |     |
| CONNECT | 898 | 895 | 899 | 900 |
| CONNECT | 899 | 898 |     |     |
| CONNECT | 900 | 898 | 901 | 902 |
| CONNECT | 901 | 900 |     |     |
| CONNECT | 902 | 900 | 903 | 904 |
| CONNECT | 903 | 902 |     |     |
| CONNECT | 904 | 891 | 902 | 905 |
| CONNECT | 905 | 892 | 889 | 904 |
| CONNECT | 906 | 889 | 893 | 907 |
| CONNECT | 907 | 906 | 908 | 922 |
| CONNECT | 908 | 907 | 909 | 910 |
| CONNECT | 909 | 908 |     |     |
| CONNECT | 910 | 908 | 911 | 912 |
| CONNECT | 911 | 910 |     |     |
| CONNECT | 912 | 910 | 913 | 921 |
| CONNECT | 913 | 912 | 914 | 915 |
| CONNECT | 914 | 913 |     |     |
| CONNECT | 915 | 913 | 916 | 917 |
| CONNECT | 916 | 915 |     |     |
| CONNECT | 917 | 915 | 918 | 919 |
| CONNECT | 918 | 917 |     |     |
| CONNECT | 919 | 917 | 920 | 921 |
| CONNECT | 920 | 919 |     |     |
| CONNECT | 921 | 912 | 919 | 922 |
| CONNECT | 922 | 907 | 921 | 923 |
| CONNECT | 923 | 922 |     |     |
| CONNECT | 925 | 941 | 942 |     |
| CONNECT | 926 | 933 |     |     |
| CONNECT | 927 | 931 | 940 |     |
| CONNECT | 928 | 929 | 941 |     |
| CONNECT | 929 | 928 | 942 |     |
| CONNECT | 930 | 933 |     |     |
| CONNECT | 931 | 927 | 932 | 934 |
| CONNECT | 932 | 931 |     |     |
| CONNECT | 933 | 926 | 930 |     |
| CONNECT | 934 | 931 | 935 | 936 |
| CONNECT | 935 | 934 |     |     |
| CONNECT | 936 | 934 | 937 | 938 |
| CONNECT | 937 | 936 |     |     |
| CONNECT | 938 | 936 | 939 | 940 |
| CONNECT | 939 | 938 |     |     |
| CONNECT | 940 | 927 | 938 | 941 |
| CONNECT | 941 | 940 | 925 | 928 |
| CONNECT | 942 | 929 | 925 | 943 |
| CONNECT | 943 | 942 | 944 | 958 |

|         |      |      |      |     |
|---------|------|------|------|-----|
| CONNECT | 944  | 943  | 945  | 946 |
| CONNECT | 945  | 944  |      |     |
| CONNECT | 946  | 944  | 947  | 948 |
| CONNECT | 947  | 946  |      |     |
| CONNECT | 948  | 946  | 949  | 957 |
| CONNECT | 949  | 948  | 950  | 951 |
| CONNECT | 950  | 949  |      |     |
| CONNECT | 951  | 949  | 952  | 953 |
| CONNECT | 952  | 951  |      |     |
| CONNECT | 953  | 951  | 954  | 955 |
| CONNECT | 954  | 953  |      |     |
| CONNECT | 955  | 953  | 956  | 957 |
| CONNECT | 956  | 955  |      |     |
| CONNECT | 957  | 948  | 955  | 958 |
| CONNECT | 958  | 957  | 943  | 959 |
| CONNECT | 959  | 958  |      |     |
| CONNECT | 960  | 976  | 977  |     |
| CONNECT | 961  | 968  |      |     |
| CONNECT | 962  | 966  | 975  |     |
| CONNECT | 963  | 964  | 976  |     |
| CONNECT | 964  | 963  | 977  |     |
| CONNECT | 965  | 968  |      |     |
| CONNECT | 966  | 962  | 967  | 969 |
| CONNECT | 967  | 966  |      |     |
| CONNECT | 968  | 961  | 965  |     |
| CONNECT | 969  | 966  | 970  | 971 |
| CONNECT | 970  | 969  |      |     |
| CONNECT | 971  | 969  | 972  | 973 |
| CONNECT | 972  | 971  |      |     |
| CONNECT | 973  | 971  | 974  | 975 |
| CONNECT | 974  | 973  |      |     |
| CONNECT | 975  | 973  | 962  | 976 |
| CONNECT | 976  | 960  | 963  | 975 |
| CONNECT | 977  | 960  | 964  | 978 |
| CONNECT | 978  | 977  | 979  | 993 |
| CONNECT | 979  | 978  | 980  | 981 |
| CONNECT | 980  | 979  |      |     |
| CONNECT | 981  | 979  | 982  | 983 |
| CONNECT | 982  | 981  |      |     |
| CONNECT | 983  | 981  | 984  | 992 |
| CONNECT | 984  | 983  | 985  | 986 |
| CONNECT | 985  | 984  |      |     |
| CONNECT | 986  | 984  | 987  | 988 |
| CONNECT | 987  | 986  |      |     |
| CONNECT | 988  | 986  | 989  | 990 |
| CONNECT | 989  | 988  |      |     |
| CONNECT | 990  | 988  | 991  | 992 |
| CONNECT | 991  | 990  |      |     |
| CONNECT | 992  | 990  | 983  | 993 |
| CONNECT | 993  | 978  | 992  | 994 |
| CONNECT | 994  | 993  |      |     |
| CONNECT | 996  | 1012 | 1013 |     |
| CONNECT | 997  | 1004 |      |     |
| CONNECT | 998  | 1002 | 1011 |     |
| CONNECT | 999  | 1000 | 1012 |     |
| CONNECT | 1000 | 999  | 1013 |     |
| CONNECT | 1001 | 1004 |      |     |

CONNECT 1002 998 1003 1005  
CONNECT 1003 1002  
CONNECT 1004 997 1001  
CONNECT 1005 1002 1006 1007  
CONNECT 1006 1005  
CONNECT 1007 1005 1008 1009  
CONNECT 1008 1007  
CONNECT 1009 1007 1010 1011  
CONNECT 1010 1009  
CONNECT 1011 1009 998 1012  
CONNECT 1012 1011 996 999  
CONNECT 1013 996 1000 1014  
CONNECT 1014 1013 1015 1029  
CONNECT 1015 1014 1016 1017  
CONNECT 1016 1015  
CONNECT 1017 1015 1018 1019  
CONNECT 1018 1017  
CONNECT 1019 1017 1020 1028  
CONNECT 1020 1019 1021 1022  
CONNECT 1021 1020  
CONNECT 1022 1020 1023 1024  
CONNECT 1023 1022  
CONNECT 1024 1022 1025 1026  
CONNECT 1025 1024  
CONNECT 1026 1024 1027 1028  
CONNECT 1027 1026  
CONNECT 1028 1026 1019 1029  
CONNECT 1029 1014 1028 1030  
CONNECT 1030 1029  
CONNECT 1031 1047 1048  
CONNECT 1032 1039  
CONNECT 1033 1037 1046  
CONNECT 1034 1035 1047  
CONNECT 1035 1034 1048  
CONNECT 1036 1039  
CONNECT 1037 1033 1038 1040  
CONNECT 1038 1037  
CONNECT 1039 1032 1036  
CONNECT 1040 1037 1041 1042  
CONNECT 1041 1040  
CONNECT 1042 1040 1043 1044  
CONNECT 1043 1042  
CONNECT 1044 1042 1045 1046  
CONNECT 1045 1044  
CONNECT 1046 1033 1044 1047  
CONNECT 1047 1031 1034 1046  
CONNECT 1048 1031 1035 1049  
CONNECT 1049 1048 1050 1064  
CONNECT 1050 1049 1051 1052  
CONNECT 1051 1050  
CONNECT 1052 1050 1053 1054  
CONNECT 1053 1052  
CONNECT 1054 1052 1055 1063  
CONNECT 1055 1054 1056 1057  
CONNECT 1056 1055  
CONNECT 1057 1055 1058 1059  
CONNECT 1058 1057

```

CONNECT 1059 1057 1060 1061
CONNECT 1060 1059
CONNECT 1061 1059 1062 1063
CONNECT 1062 1061
CONNECT 1063 1061 1054 1064
CONNECT 1064 1063 1049 1065
CONNECT 1065 1064

```

**Table 4. PDB file of the optimised structure of the 15-nuclear model of the HS centre in LS matrix**

```

TITLE          CSD ENTRY jmk-126-09
REMARK        1 File created by GaussView 6.0.16
HETATM        1 Zn          0      -19.118   5.721  -0.752
Zn
HETATM        2 S           0      -14.660   5.023   0.111
S
HETATM        3 S           0      -20.184   3.082   3.177
S
HETATM        4 N           0      -18.102   6.968   0.749
N
HETATM        5 N           0      -17.065   4.930  -0.687
N
HETATM        6 N           0      -16.438   3.912  -1.358
N
HETATM        7 N           0      -19.648   4.417   0.794
N
HETATM        8 C           0      -18.642   7.940   1.467
C
HETATM        9 H           0      -19.570   8.117   1.367
H
HETATM       10 C           0      -19.858   3.861   1.789
C
HETATM       11 C           0      -17.915   8.711   2.355
C
HETATM       12 H           0      -18.341   9.402   2.850
H
HETATM       13 C           0      -16.581   8.473   2.516
C
HETATM       14 H           0      -16.065   9.001   3.115
H
HETATM       15 C           0      -15.989   7.449   1.793
C
HETATM       16 H           0      -15.064   7.256   1.891
H
HETATM       17 C           0      -16.780   6.708   0.920
C
HETATM       18 C           0      -16.279   5.602   0.116
C
HETATM       19 C           0      -15.159   3.840  -1.050
C
HETATM       20 C           0      -14.223   2.874  -1.642
C
HETATM       21 C           0      -14.700   1.821  -2.445
C
HETATM       22 H           0      -15.633   1.724  -2.591
H
HETATM       23 C           0      -13.834   0.947  -3.012
C

```

|        |    |   |   |         |        |        |
|--------|----|---|---|---------|--------|--------|
| HETATM | 24 | H | 0 | -14.173 | 0.224  | -3.525 |
| H      |    |   |   |         |        |        |
| HETATM | 25 | C | 0 | -12.415 | 1.092  | -2.852 |
| C      |    |   |   |         |        |        |
| HETATM | 26 | C | 0 | -11.502 | 0.226  | -3.453 |
| C      |    |   |   |         |        |        |
| HETATM | 27 | H | 0 | -11.818 | -0.486 | -3.999 |
| H      |    |   |   |         |        |        |
| HETATM | 28 | C | 0 | -10.148 | 0.392  | -3.265 |
| C      |    |   |   |         |        |        |
| HETATM | 29 | H | 0 | -9.535  | -0.217 | -3.664 |
| H      |    |   |   |         |        |        |
| HETATM | 30 | C | 0 | -9.673  | 1.443  | -2.495 |
| C      |    |   |   |         |        |        |
| HETATM | 31 | H | 0 | -8.737  | 1.558  | -2.385 |
| H      |    |   |   |         |        |        |
| HETATM | 32 | C | 0 | -10.541 | 2.319  | -1.889 |
| C      |    |   |   |         |        |        |
| HETATM | 33 | H | 0 | -10.206 | 3.035  | -1.363 |
| H      |    |   |   |         |        |        |
| HETATM | 34 | C | 0 | -11.951 | 2.149  | -2.054 |
| C      |    |   |   |         |        |        |
| HETATM | 35 | C | 0 | -12.865 | 3.023  | -1.448 |
| C      |    |   |   |         |        |        |
| HETATM | 36 | H | 0 | -12.545 | 3.728  | -0.896 |
| H      |    |   |   |         |        |        |
| HETATM | 37 | S | 0 | -23.576 | 6.419  | -1.614 |
| S      |    |   |   |         |        |        |
| HETATM | 38 | S | 0 | -18.053 | 8.360  | -4.680 |
| S      |    |   |   |         |        |        |
| HETATM | 39 | N | 0 | -20.135 | 4.475  | -2.252 |
| N      |    |   |   |         |        |        |
| HETATM | 40 | N | 0 | -21.172 | 6.512  | -0.815 |
| N      |    |   |   |         |        |        |
| HETATM | 41 | N | 0 | -21.799 | 7.529  | -0.145 |
| N      |    |   |   |         |        |        |
| HETATM | 42 | N | 0 | -18.588 | 7.026  | -2.296 |
| N      |    |   |   |         |        |        |
| HETATM | 43 | C | 0 | -19.595 | 3.502  | -2.970 |
| C      |    |   |   |         |        |        |
| HETATM | 44 | H | 0 | -18.667 | 3.325  | -2.871 |
| H      |    |   |   |         |        |        |
| HETATM | 45 | C | 0 | -18.379 | 7.581  | -3.292 |
| C      |    |   |   |         |        |        |
| HETATM | 46 | C | 0 | -20.322 | 2.731  | -3.859 |
| C      |    |   |   |         |        |        |
| HETATM | 47 | H | 0 | -19.896 | 2.041  | -4.353 |
| H      |    |   |   |         |        |        |
| HETATM | 48 | C | 0 | -21.656 | 2.969  | -4.019 |
| C      |    |   |   |         |        |        |
| HETATM | 49 | H | 0 | -22.171 | 2.442  | -4.617 |
| H      |    |   |   |         |        |        |
| HETATM | 50 | C | 0 | -22.248 | 3.993  | -3.296 |
| C      |    |   |   |         |        |        |
| HETATM | 51 | H | 0 | -23.173 | 4.185  | -3.395 |
| H      |    |   |   |         |        |        |

|        |    |    |   |         |        |        |
|--------|----|----|---|---------|--------|--------|
| HETATM | 52 | C  | 0 | -21.457 | 4.733  | -2.424 |
| C      |    |    |   |         |        |        |
| HETATM | 53 | C  | 0 | -21.959 | 5.839  | -1.618 |
| C      |    |    |   |         |        |        |
| HETATM | 54 | C  | 0 | -23.077 | 7.602  | -0.453 |
| C      |    |    |   |         |        |        |
| HETATM | 55 | C  | 0 | -24.014 | 8.568  | 0.140  |
| C      |    |    |   |         |        |        |
| HETATM | 56 | C  | 0 | -23.537 | 9.621  | 0.943  |
| C      |    |    |   |         |        |        |
| HETATM | 57 | H  | 0 | -22.603 | 9.718  | 1.088  |
| H      |    |    |   |         |        |        |
| HETATM | 58 | C  | 0 | -24.403 | 10.495 | 1.509  |
| C      |    |    |   |         |        |        |
| HETATM | 59 | H  | 0 | -24.063 | 11.218 | 2.022  |
| H      |    |    |   |         |        |        |
| HETATM | 60 | C  | 0 | -25.823 | 10.350 | 1.350  |
| C      |    |    |   |         |        |        |
| HETATM | 61 | C  | 0 | -26.735 | 11.216 | 1.951  |
| C      |    |    |   |         |        |        |
| HETATM | 62 | H  | 0 | -26.419 | 11.928 | 2.496  |
| H      |    |    |   |         |        |        |
| HETATM | 63 | C  | 0 | -28.090 | 11.051 | 1.763  |
| C      |    |    |   |         |        |        |
| HETATM | 64 | H  | 0 | -28.701 | 11.659 | 2.162  |
| H      |    |    |   |         |        |        |
| HETATM | 65 | C  | 0 | -28.564 | 10.000 | 0.993  |
| C      |    |    |   |         |        |        |
| HETATM | 66 | H  | 0 | -29.500 | 9.884  | 0.883  |
| H      |    |    |   |         |        |        |
| HETATM | 67 | C  | 0 | -27.695 | 9.123  | 0.387  |
| C      |    |    |   |         |        |        |
| HETATM | 68 | H  | 0 | -28.031 | 8.406  | -0.139 |
| H      |    |    |   |         |        |        |
| HETATM | 69 | C  | 0 | -26.285 | 9.293  | 0.551  |
| C      |    |    |   |         |        |        |
| HETATM | 70 | C  | 0 | -25.372 | 8.419  | -0.054 |
| C      |    |    |   |         |        |        |
| HETATM | 71 | H  | 0 | -25.692 | 7.714  | -0.606 |
| H      |    |    |   |         |        |        |
| HETATM | 72 | Zn | 0 | -14.894 | -5.600 | -0.279 |
| Zn     |    |    |   |         |        |        |
| HETATM | 73 | S  | 0 | -10.436 | -6.298 | 0.583  |
| S      |    |    |   |         |        |        |
| HETATM | 74 | S  | 0 | -15.959 | -8.239 | 3.649  |
| S      |    |    |   |         |        |        |
| HETATM | 75 | N  | 0 | -13.878 | -4.353 | 1.221  |
| N      |    |    |   |         |        |        |
| HETATM | 76 | N  | 0 | -12.841 | -6.390 | -0.216 |
| N      |    |    |   |         |        |        |
| HETATM | 77 | N  | 0 | -12.214 | -7.408 | -0.886 |
| N      |    |    |   |         |        |        |
| HETATM | 78 | N  | 0 | -15.425 | -6.904 | 1.265  |
| N      |    |    |   |         |        |        |
| HETATM | 79 | C  | 0 | -14.418 | -3.380 | 1.939  |
| C      |    |    |   |         |        |        |

|        |     |   |   |         |         |        |
|--------|-----|---|---|---------|---------|--------|
| HETATM | 80  | H | 0 | -15.346 | -3.204  | 1.840  |
| H      |     |   |   |         |         |        |
| HETATM | 81  | C | 0 | -15.633 | -7.459  | 2.262  |
| C      |     |   |   |         |         |        |
| HETATM | 82  | C | 0 | -13.691 | -2.610  | 2.828  |
| C      |     |   |   |         |         |        |
| HETATM | 83  | H | 0 | -14.117 | -1.919  | 3.322  |
| H      |     |   |   |         |         |        |
| HETATM | 84  | C | 0 | -12.356 | -2.848  | 2.989  |
| C      |     |   |   |         |         |        |
| HETATM | 85  | H | 0 | -11.841 | -2.320  | 3.586  |
| H      |     |   |   |         |         |        |
| HETATM | 86  | C | 0 | -11.765 | -3.871  | 2.265  |
| C      |     |   |   |         |         |        |
| HETATM | 87  | H | 0 | -10.839 | -4.064  | 2.364  |
| H      |     |   |   |         |         |        |
| HETATM | 88  | C | 0 | -12.555 | -4.612  | 1.393  |
| C      |     |   |   |         |         |        |
| HETATM | 89  | C | 0 | -12.054 | -5.718  | 0.587  |
| C      |     |   |   |         |         |        |
| HETATM | 90  | C | 0 | -10.935 | -7.481  | -0.578 |
| C      |     |   |   |         |         |        |
| HETATM | 91  | C | 0 | -10.000 | -8.446  | -1.171 |
| C      |     |   |   |         |         |        |
| HETATM | 92  | C | 0 | -10.475 | -9.500  | -1.974 |
| C      |     |   |   |         |         |        |
| HETATM | 93  | H | 0 | -11.409 | -9.597  | -2.119 |
| H      |     |   |   |         |         |        |
| HETATM | 94  | C | 0 | -9.609  | -10.373 | -2.539 |
| C      |     |   |   |         |         |        |
| HETATM | 95  | H | 0 | -9.949  | -11.097 | -3.053 |
| H      |     |   |   |         |         |        |
| HETATM | 96  | C | 0 | -8.190  | -10.228 | -2.381 |
| C      |     |   |   |         |         |        |
| HETATM | 97  | C | 0 | -7.277  | -11.095 | -2.982 |
| C      |     |   |   |         |         |        |
| HETATM | 98  | H | 0 | -7.594  | -11.806 | -3.527 |
| H      |     |   |   |         |         |        |
| HETATM | 99  | C | 0 | -5.923  | -10.929 | -2.793 |
| C      |     |   |   |         |         |        |
| HETATM | 100 | H | 0 | -5.312  | -11.537 | -3.193 |
| H      |     |   |   |         |         |        |
| HETATM | 101 | C | 0 | -5.449  | -9.877  | -2.024 |
| C      |     |   |   |         |         |        |
| HETATM | 102 | H | 0 | -4.513  | -9.762  | -1.913 |
| H      |     |   |   |         |         |        |
| HETATM | 103 | C | 0 | -6.318  | -9.002  | -1.418 |
| C      |     |   |   |         |         |        |
| HETATM | 104 | H | 0 | -5.982  | -8.285  | -0.892 |
| H      |     |   |   |         |         |        |
| HETATM | 105 | C | 0 | -7.728  | -9.171  | -1.582 |
| C      |     |   |   |         |         |        |
| HETATM | 106 | C | 0 | -8.640  | -8.297  | -0.976 |
| C      |     |   |   |         |         |        |
| HETATM | 107 | H | 0 | -8.320  | -7.592  | -0.425 |
| H      |     |   |   |         |         |        |



|        |     |   |   |         |        |        |
|--------|-----|---|---|---------|--------|--------|
| HETATM | 108 | S | 0 | -19.353 | -4.901 | -1.142 |
| S      |     |   |   |         |        |        |
| HETATM | 109 | S | 0 | -13.829 | -2.960 | -4.208 |
| S      |     |   |   |         |        |        |
| HETATM | 110 | N | 0 | -15.911 | -6.845 | -1.780 |
| N      |     |   |   |         |        |        |
| HETATM | 111 | N | 0 | -16.948 | -4.808 | -0.343 |
| N      |     |   |   |         |        |        |
| HETATM | 112 | N | 0 | -17.574 | -3.791 | 0.327  |
| N      |     |   |   |         |        |        |
| HETATM | 113 | N | 0 | -14.364 | -4.295 | -1.825 |
| N      |     |   |   |         |        |        |
| HETATM | 114 | C | 0 | -15.370 | -7.819 | -2.498 |
| C      |     |   |   |         |        |        |
| HETATM | 115 | H | 0 | -14.442 | -7.995 | -2.398 |
| H      |     |   |   |         |        |        |
| HETATM | 116 | C | 0 | -14.155 | -3.740 | -2.820 |
| C      |     |   |   |         |        |        |
| HETATM | 117 | C | 0 | -16.097 | -8.589 | -3.386 |
| C      |     |   |   |         |        |        |
| HETATM | 118 | H | 0 | -15.672 | -9.280 | -3.881 |
| H      |     |   |   |         |        |        |
| HETATM | 119 | C | 0 | -17.432 | -8.351 | -3.547 |
| C      |     |   |   |         |        |        |
| HETATM | 120 | H | 0 | -17.947 | -8.879 | -4.146 |
| H      |     |   |   |         |        |        |
| HETATM | 121 | C | 0 | -18.024 | -7.327 | -2.824 |
| C      |     |   |   |         |        |        |
| HETATM | 122 | H | 0 | -18.949 | -7.135 | -2.922 |
| H      |     |   |   |         |        |        |
| HETATM | 123 | C | 0 | -17.233 | -6.586 | -1.952 |
| C      |     |   |   |         |        |        |
| HETATM | 124 | C | 0 | -17.734 | -5.481 | -1.147 |
| C      |     |   |   |         |        |        |
| HETATM | 125 | C | 0 | -18.853 | -3.718 | 0.019  |
| C      |     |   |   |         |        |        |
| HETATM | 126 | C | 0 | -19.790 | -2.753 | 0.611  |
| C      |     |   |   |         |        |        |
| HETATM | 127 | C | 0 | -19.313 | -1.699 | 1.415  |
| C      |     |   |   |         |        |        |
| HETATM | 128 | H | 0 | -18.380 | -1.602 | 1.560  |
| H      |     |   |   |         |        |        |
| HETATM | 129 | C | 0 | -20.179 | -0.826 | 1.981  |
| C      |     |   |   |         |        |        |
| HETATM | 130 | H | 0 | -19.839 | -0.102 | 2.494  |
| H      |     |   |   |         |        |        |
| HETATM | 131 | C | 0 | -21.598 | -0.970 | 1.821  |
| C      |     |   |   |         |        |        |
| HETATM | 132 | C | 0 | -22.511 | -0.104 | 2.422  |
| C      |     |   |   |         |        |        |
| HETATM | 133 | H | 0 | -22.194 | 0.607  | 2.968  |
| H      |     |   |   |         |        |        |
| HETATM | 134 | C | 0 | -23.865 | -0.269 | 2.234  |
| C      |     |   |   |         |        |        |
| HETATM | 135 | H | 0 | -24.477 | 0.338  | 2.633  |
| H      |     |   |   |         |        |        |

|        |     |    |   |         |         |        |
|--------|-----|----|---|---------|---------|--------|
| HETATM | 136 | C  | 0 | -24.340 | -1.321  | 1.464  |
| C      |     |    |   |         |         |        |
| HETATM | 137 | H  | 0 | -25.275 | -1.437  | 1.354  |
| H      |     |    |   |         |         |        |
| HETATM | 138 | C  | 0 | -23.471 | -2.198  | 0.858  |
| C      |     |    |   |         |         |        |
| HETATM | 139 | H  | 0 | -23.806 | -2.914  | 0.332  |
| H      |     |    |   |         |         |        |
| HETATM | 140 | C  | 0 | -22.061 | -2.028  | 1.023  |
| C      |     |    |   |         |         |        |
| HETATM | 141 | C  | 0 | -21.148 | -2.902  | 0.417  |
| C      |     |    |   |         |         |        |
| HETATM | 142 | H  | 0 | -21.468 | -3.606  | -0.135 |
| H      |     |    |   |         |         |        |
| HETATM | 143 | Zn | 0 | -10.670 | -16.920 | 0.192  |
| Zn     |     |    |   |         |         |        |
| HETATM | 144 | S  | 0 | -6.212  | -17.618 | 1.055  |
| S      |     |    |   |         |         |        |
| HETATM | 145 | S  | 0 | -11.734 | -19.559 | 4.121  |
| S      |     |    |   |         |         |        |
| HETATM | 146 | N  | 0 | -9.654  | -15.674 | 1.693  |
| N      |     |    |   |         |         |        |
| HETATM | 147 | N  | 0 | -8.617  | -17.711 | 0.257  |
| N      |     |    |   |         |         |        |
| HETATM | 148 | N  | 0 | -7.990  | -18.729 | -0.414 |
| N      |     |    |   |         |         |        |
| HETATM | 149 | N  | 0 | -11.200 | -18.224 | 1.738  |
| N      |     |    |   |         |         |        |
| HETATM | 150 | C  | 0 | -10.194 | -14.700 | 2.411  |
| C      |     |    |   |         |         |        |
| HETATM | 151 | H  | 0 | -11.122 | -14.525 | 2.311  |
| H      |     |    |   |         |         |        |
| HETATM | 152 | C  | 0 | -11.408 | -18.780 | 2.733  |
| C      |     |    |   |         |         |        |
| HETATM | 153 | C  | 0 | -9.466  | -13.930 | 3.299  |
| C      |     |    |   |         |         |        |
| HETATM | 154 | H  | 0 | -9.892  | -13.239 | 3.794  |
| H      |     |    |   |         |         |        |
| HETATM | 155 | C  | 0 | -8.133  | -14.169 | 3.460  |
| C      |     |    |   |         |         |        |
| HETATM | 156 | H  | 0 | -7.617  | -13.640 | 4.059  |
| H      |     |    |   |         |         |        |
| HETATM | 157 | C  | 0 | -7.541  | -15.192 | 2.737  |
| C      |     |    |   |         |         |        |
| HETATM | 158 | H  | 0 | -6.615  | -15.384 | 2.835  |
| H      |     |    |   |         |         |        |
| HETATM | 159 | C  | 0 | -8.332  | -15.933 | 1.865  |
| C      |     |    |   |         |         |        |
| HETATM | 160 | C  | 0 | -7.831  | -17.038 | 1.060  |
| C      |     |    |   |         |         |        |
| HETATM | 161 | C  | 0 | -6.711  | -18.801 | -0.106 |
| C      |     |    |   |         |         |        |
| HETATM | 162 | C  | 0 | -5.775  | -19.766 | -0.698 |
| C      |     |    |   |         |         |        |
| HETATM | 163 | C  | 0 | -6.251  | -20.819 | -1.502 |
| C      |     |    |   |         |         |        |

|        |     |   |   |         |         |        |
|--------|-----|---|---|---------|---------|--------|
| HETATM | 164 | H | 0 | -7.185  | -20.916 | -1.648 |
| H      |     |   |   |         |         |        |
| HETATM | 165 | C | 0 | -5.385  | -21.693 | -2.068 |
| C      |     |   |   |         |         |        |
| HETATM | 166 | H | 0 | -5.725  | -22.417 | -2.581 |
| H      |     |   |   |         |         |        |
| HETATM | 167 | C | 0 | -3.966  | -21.549 | -1.908 |
| C      |     |   |   |         |         |        |
| HETATM | 168 | C | 0 | -3.054  | -22.416 | -2.509 |
| C      |     |   |   |         |         |        |
| HETATM | 169 | H | 0 | -3.369  | -23.127 | -3.055 |
| H      |     |   |   |         |         |        |
| HETATM | 170 | C | 0 | -1.699  | -22.249 | -2.321 |
| C      |     |   |   |         |         |        |
| HETATM | 171 | H | 0 | -1.087  | -22.858 | -2.720 |
| H      |     |   |   |         |         |        |
| HETATM | 172 | C | 0 | -1.225  | -21.198 | -1.552 |
| C      |     |   |   |         |         |        |
| HETATM | 173 | H | 0 | -0.288  | -21.082 | -1.441 |
| H      |     |   |   |         |         |        |
| HETATM | 174 | C | 0 | -2.093  | -20.322 | -0.945 |
| C      |     |   |   |         |         |        |
| HETATM | 175 | H | 0 | -1.758  | -19.606 | -0.419 |
| H      |     |   |   |         |         |        |
| HETATM | 176 | C | 0 | -3.503  | -20.491 | -1.110 |
| C      |     |   |   |         |         |        |
| HETATM | 177 | C | 0 | -4.416  | -19.618 | -0.504 |
| C      |     |   |   |         |         |        |
| HETATM | 178 | H | 0 | -4.097  | -18.913 | 0.048  |
| H      |     |   |   |         |         |        |
| HETATM | 179 | S | 0 | -15.128 | -16.222 | -0.670 |
| S      |     |   |   |         |         |        |
| HETATM | 180 | S | 0 | -9.605  | -14.281 | -3.736 |
| S      |     |   |   |         |         |        |
| HETATM | 181 | N | 0 | -11.686 | -18.166 | -1.308 |
| N      |     |   |   |         |         |        |
| HETATM | 182 | N | 0 | -12.723 | -16.128 | 0.129  |
| N      |     |   |   |         |         |        |
| HETATM | 183 | N | 0 | -13.350 | -15.111 | 0.799  |
| N      |     |   |   |         |         |        |
| HETATM | 184 | N | 0 | -10.140 | -15.616 | -1.352 |
| N      |     |   |   |         |         |        |
| HETATM | 185 | C | 0 | -11.147 | -19.140 | -2.026 |
| C      |     |   |   |         |         |        |
| HETATM | 186 | H | 0 | -10.218 | -19.316 | -1.927 |
| H      |     |   |   |         |         |        |
| HETATM | 187 | C | 0 | -9.931  | -15.060 | -2.347 |
| C      |     |   |   |         |         |        |
| HETATM | 188 | C | 0 | -11.873 | -19.910 | -2.915 |
| C      |     |   |   |         |         |        |
| HETATM | 189 | H | 0 | -11.448 | -20.600 | -3.409 |
| H      |     |   |   |         |         |        |
| HETATM | 190 | C | 0 | -13.207 | -19.672 | -3.075 |
| C      |     |   |   |         |         |        |
| HETATM | 191 | H | 0 | -13.723 | -20.200 | -3.673 |
| H      |     |   |   |         |         |        |

|        |     |    |   |         |         |        |
|--------|-----|----|---|---------|---------|--------|
| HETATM | 192 | C  | 0 | -13.799 | -18.647 | -2.352 |
| C      |     |    |   |         |         |        |
| HETATM | 193 | H  | 0 | -14.725 | -18.456 | -2.451 |
| H      |     |    |   |         |         |        |
| HETATM | 194 | C  | 0 | -13.008 | -17.906 | -1.480 |
| C      |     |    |   |         |         |        |
| HETATM | 195 | C  | 0 | -13.509 | -16.802 | -0.674 |
| C      |     |    |   |         |         |        |
| HETATM | 196 | C  | 0 | -14.629 | -15.039 | 0.491  |
| C      |     |    |   |         |         |        |
| HETATM | 197 | C  | 0 | -15.565 | -14.073 | 1.084  |
| C      |     |    |   |         |         |        |
| HETATM | 198 | C  | 0 | -15.089 | -13.020 | 1.887  |
| C      |     |    |   |         |         |        |
| HETATM | 199 | H  | 0 | -14.155 | -12.923 | 2.032  |
| H      |     |    |   |         |         |        |
| HETATM | 200 | C  | 0 | -15.955 | -12.146 | 2.453  |
| C      |     |    |   |         |         |        |
| HETATM | 201 | H  | 0 | -15.615 | -11.422 | 2.966  |
| H      |     |    |   |         |         |        |
| HETATM | 202 | C  | 0 | -17.374 | -12.291 | 2.294  |
| C      |     |    |   |         |         |        |
| HETATM | 203 | C  | 0 | -18.286 | -11.424 | 2.895  |
| C      |     |    |   |         |         |        |
| HETATM | 204 | H  | 0 | -17.971 | -10.713 | 3.440  |
| H      |     |    |   |         |         |        |
| HETATM | 205 | C  | 0 | -19.641 | -11.590 | 2.707  |
| C      |     |    |   |         |         |        |
| HETATM | 206 | H  | 0 | -20.252 | -10.982 | 3.106  |
| H      |     |    |   |         |         |        |
| HETATM | 207 | C  | 0 | -20.115 | -12.642 | 1.937  |
| C      |     |    |   |         |         |        |
| HETATM | 208 | H  | 0 | -21.052 | -12.758 | 1.826  |
| H      |     |    |   |         |         |        |
| HETATM | 209 | C  | 0 | -19.247 | -13.518 | 1.331  |
| C      |     |    |   |         |         |        |
| HETATM | 210 | H  | 0 | -19.582 | -14.234 | 0.805  |
| H      |     |    |   |         |         |        |
| HETATM | 211 | C  | 0 | -17.837 | -13.348 | 1.495  |
| C      |     |    |   |         |         |        |
| HETATM | 212 | C  | 0 | -16.924 | -14.223 | 0.889  |
| C      |     |    |   |         |         |        |
| HETATM | 213 | H  | 0 | -17.243 | -14.926 | 0.338  |
| H      |     |    |   |         |         |        |
| HETATM | 214 | Zn | 0 | -11.671 | 8.521   | -0.612 |
| Zn     |     |    |   |         |         |        |
| HETATM | 215 | S  | 0 | -7.213  | 7.822   | 0.251  |
| S      |     |    |   |         |         |        |
| HETATM | 216 | S  | 0 | -12.736 | 5.882   | 3.316  |
| S      |     |    |   |         |         |        |
| HETATM | 217 | N  | 0 | -10.655 | 9.767   | 0.888  |
| N      |     |    |   |         |         |        |
| HETATM | 218 | N  | 0 | -9.618  | 7.730   | -0.548 |
| N      |     |    |   |         |         |        |
| HETATM | 219 | N  | 0 | -8.991  | 6.712   | -1.218 |
| N      |     |    |   |         |         |        |

|        |     |   |   |         |        |        |
|--------|-----|---|---|---------|--------|--------|
| HETATM | 220 | N | 0 | -12.201 | 7.216  | 0.933  |
| N      |     |   |   |         |        |        |
| HETATM | 221 | C | 0 | -11.195 | 10.740 | 1.607  |
| C      |     |   |   |         |        |        |
| HETATM | 222 | H | 0 | -12.123 | 10.916 | 1.507  |
| H      |     |   |   |         |        |        |
| HETATM | 223 | C | 0 | -12.410 | 6.661  | 1.929  |
| C      |     |   |   |         |        |        |
| HETATM | 224 | C | 0 | -10.469 | 11.510 | 2.495  |
| C      |     |   |   |         |        |        |
| HETATM | 225 | H | 0 | -10.894 | 12.202 | 2.990  |
| H      |     |   |   |         |        |        |
| HETATM | 226 | C | 0 | -9.134  | 11.272 | 2.656  |
| C      |     |   |   |         |        |        |
| HETATM | 227 | H | 0 | -8.618  | 11.800 | 3.255  |
| H      |     |   |   |         |        |        |
| HETATM | 228 | C | 0 | -8.542  | 10.249 | 1.933  |
| C      |     |   |   |         |        |        |
| HETATM | 229 | H | 0 | -7.616  | 10.056 | 2.031  |
| H      |     |   |   |         |        |        |
| HETATM | 230 | C | 0 | -9.333  | 9.508  | 1.060  |
| C      |     |   |   |         |        |        |
| HETATM | 231 | C | 0 | -8.832  | 8.402  | 0.256  |
| C      |     |   |   |         |        |        |
| HETATM | 232 | C | 0 | -7.712  | 6.639  | -0.910 |
| C      |     |   |   |         |        |        |
| HETATM | 233 | C | 0 | -6.776  | 5.674  | -1.502 |
| C      |     |   |   |         |        |        |
| HETATM | 234 | C | 0 | -7.252  | 4.621  | -2.306 |
| C      |     |   |   |         |        |        |
| HETATM | 235 | H | 0 | -8.186  | 4.523  | -2.452 |
| H      |     |   |   |         |        |        |
| HETATM | 236 | C | 0 | -6.387  | 3.747  | -2.872 |
| C      |     |   |   |         |        |        |
| HETATM | 237 | H | 0 | -6.726  | 3.023  | -3.385 |
| H      |     |   |   |         |        |        |
| HETATM | 238 | C | 0 | -4.968  | 3.892  | -2.712 |
| C      |     |   |   |         |        |        |
| HETATM | 239 | C | 0 | -4.055  | 3.025  | -3.314 |
| C      |     |   |   |         |        |        |
| HETATM | 240 | H | 0 | -4.370  | 2.314  | -3.860 |
| H      |     |   |   |         |        |        |
| HETATM | 241 | C | 0 | -2.700  | 3.192  | -3.126 |
| C      |     |   |   |         |        |        |
| HETATM | 242 | H | 0 | -2.089  | 2.583  | -3.525 |
| H      |     |   |   |         |        |        |
| HETATM | 243 | C | 0 | -2.226  | 4.242  | -2.356 |
| C      |     |   |   |         |        |        |
| HETATM | 244 | H | 0 | -1.289  | 4.358  | -2.246 |
| H      |     |   |   |         |        |        |
| HETATM | 245 | C | 0 | -3.094  | 5.119  | -1.750 |
| C      |     |   |   |         |        |        |
| HETATM | 246 | H | 0 | -2.759  | 5.835  | -1.223 |
| H      |     |   |   |         |        |        |
| HETATM | 247 | C | 0 | -4.504  | 4.949  | -1.914 |
| C      |     |   |   |         |        |        |

|        |     |   |   |         |        |        |
|--------|-----|---|---|---------|--------|--------|
| HETATM | 248 | C | 0 | -5.418  | 5.823  | -1.309 |
| C      |     |   |   |         |        |        |
| HETATM | 249 | H | 0 | -5.098  | 6.528  | -0.757 |
| H      |     |   |   |         |        |        |
| HETATM | 250 | S | 0 | -16.130 | 9.219  | -1.474 |
| S      |     |   |   |         |        |        |
| HETATM | 251 | S | 0 | -10.607 | 11.160 | -4.540 |
| S      |     |   |   |         |        |        |
| HETATM | 252 | N | 0 | -12.688 | 7.275  | -2.113 |
| N      |     |   |   |         |        |        |
| HETATM | 253 | N | 0 | -13.724 | 9.312  | -0.675 |
| N      |     |   |   |         |        |        |
| HETATM | 254 | N | 0 | -14.351 | 10.329 | -0.005 |
| N      |     |   |   |         |        |        |
| HETATM | 255 | N | 0 | -11.141 | 9.825  | -2.156 |
| N      |     |   |   |         |        |        |
| HETATM | 256 | C | 0 | -12.148 | 6.301  | -2.830 |
| C      |     |   |   |         |        |        |
| HETATM | 257 | H | 0 | -11.219 | 6.125  | -2.731 |
| H      |     |   |   |         |        |        |
| HETATM | 258 | C | 0 | -10.933 | 10.380 | -3.152 |
| C      |     |   |   |         |        |        |
| HETATM | 259 | C | 0 | -12.875 | 5.531  | -3.719 |
| C      |     |   |   |         |        |        |
| HETATM | 260 | H | 0 | -12.449 | 4.841  | -4.213 |
| H      |     |   |   |         |        |        |
| HETATM | 261 | C | 0 | -14.209 | 5.769  | -3.879 |
| C      |     |   |   |         |        |        |
| HETATM | 262 | H | 0 | -14.724 | 5.241  | -4.478 |
| H      |     |   |   |         |        |        |
| HETATM | 263 | C | 0 | -14.800 | 6.793  | -3.156 |
| C      |     |   |   |         |        |        |
| HETATM | 264 | H | 0 | -15.726 | 6.985  | -3.255 |
| H      |     |   |   |         |        |        |
| HETATM | 265 | C | 0 | -14.009 | 7.533  | -2.284 |
| C      |     |   |   |         |        |        |
| HETATM | 266 | C | 0 | -14.511 | 8.639  | -1.479 |
| C      |     |   |   |         |        |        |
| HETATM | 267 | C | 0 | -15.630 | 10.402 | -0.313 |
| C      |     |   |   |         |        |        |
| HETATM | 268 | C | 0 | -16.566 | 11.368 | 0.279  |
| C      |     |   |   |         |        |        |
| HETATM | 269 | C | 0 | -16.090 | 12.421 | 1.083  |
| C      |     |   |   |         |        |        |
| HETATM | 270 | H | 0 | -15.156 | 12.518 | 1.228  |
| H      |     |   |   |         |        |        |
| HETATM | 271 | C | 0 | -16.956 | 13.295 | 1.649  |
| C      |     |   |   |         |        |        |
| HETATM | 272 | H | 0 | -16.616 | 14.018 | 2.162  |
| H      |     |   |   |         |        |        |
| HETATM | 273 | C | 0 | -18.376 | 13.150 | 1.489  |
| C      |     |   |   |         |        |        |
| HETATM | 274 | C | 0 | -19.288 | 14.016 | 2.091  |
| C      |     |   |   |         |        |        |
| HETATM | 275 | H | 0 | -18.972 | 14.727 | 2.635  |
| H      |     |   |   |         |        |        |

|        |     |    |   |         |        |        |
|--------|-----|----|---|---------|--------|--------|
| HETATM | 276 | C  | 0 | -20.643 | 13.851 | 1.902  |
| C      |     |    |   |         |        |        |
| HETATM | 277 | H  | 0 | -21.254 | 14.458 | 2.301  |
| H      |     |    |   |         |        |        |
| HETATM | 278 | C  | 0 | -21.117 | 12.799 | 1.133  |
| C      |     |    |   |         |        |        |
| HETATM | 279 | H  | 0 | -22.053 | 12.683 | 1.022  |
| H      |     |    |   |         |        |        |
| HETATM | 280 | C  | 0 | -20.248 | 11.923 | 0.527  |
| C      |     |    |   |         |        |        |
| HETATM | 281 | H  | 0 | -20.583 | 11.206 | 0.000  |
| H      |     |    |   |         |        |        |
| HETATM | 282 | C  | 0 | -18.838 | 12.092 | 0.691  |
| C      |     |    |   |         |        |        |
| HETATM | 283 | C  | 0 | -17.926 | 11.218 | 0.085  |
| C      |     |    |   |         |        |        |
| HETATM | 284 | H  | 0 | -18.244 | 10.514 | -0.467 |
| H      |     |    |   |         |        |        |
| HETATM | 285 | Zn | 0 | -7.447  | -2.800 | -0.140 |
| Zn     |     |    |   |         |        |        |
| HETATM | 286 | S  | 0 | -2.988  | -3.498 | 0.723  |
| S      |     |    |   |         |        |        |
| HETATM | 287 | S  | 0 | -8.512  | -5.439 | 3.789  |
| S      |     |    |   |         |        |        |
| HETATM | 288 | N  | 0 | -6.431  | -1.553 | 1.361  |
| N      |     |    |   |         |        |        |
| HETATM | 289 | N  | 0 | -5.394  | -3.591 | -0.076 |
| N      |     |    |   |         |        |        |
| HETATM | 290 | N  | 0 | -4.767  | -4.608 | -0.746 |
| N      |     |    |   |         |        |        |
| HETATM | 291 | N  | 0 | -7.978  | -4.105 | 1.405  |
| N      |     |    |   |         |        |        |
| HETATM | 292 | C  | 0 | -6.971  | -0.581 | 2.078  |
| C      |     |    |   |         |        |        |
| HETATM | 293 | H  | 0 | -7.899  | -0.404 | 1.979  |
| H      |     |    |   |         |        |        |
| HETATM | 294 | C  | 0 | -8.186  | -4.660 | 2.401  |
| C      |     |    |   |         |        |        |
| HETATM | 295 | C  | 0 | -6.244  | 0.190  | 2.968  |
| C      |     |    |   |         |        |        |
| HETATM | 296 | H  | 0 | -6.670  | 0.881  | 3.461  |
| H      |     |    |   |         |        |        |
| HETATM | 297 | C  | 0 | -4.909  | -0.048 | 3.128  |
| C      |     |    |   |         |        |        |
| HETATM | 298 | H  | 0 | -4.394  | 0.480  | 3.726  |
| H      |     |    |   |         |        |        |
| HETATM | 299 | C  | 0 | -4.318  | -1.072 | 2.404  |
| C      |     |    |   |         |        |        |
| HETATM | 300 | H  | 0 | -3.392  | -1.264 | 2.504  |
| H      |     |    |   |         |        |        |
| HETATM | 301 | C  | 0 | -5.108  | -1.812 | 1.533  |
| C      |     |    |   |         |        |        |
| HETATM | 302 | C  | 0 | -4.607  | -2.918 | 0.727  |
| C      |     |    |   |         |        |        |
| HETATM | 303 | C  | 0 | -3.489  | -4.681 | -0.438 |
| C      |     |    |   |         |        |        |

|        |     |   |   |         |        |        |
|--------|-----|---|---|---------|--------|--------|
| HETATM | 304 | C | 0 | -2.552  | -5.646 | -1.031 |
| C      |     |   |   |         |        |        |
| HETATM | 305 | C | 0 | -3.028  | -6.700 | -1.834 |
| C      |     |   |   |         |        |        |
| HETATM | 306 | H | 0 | -3.961  | -6.797 | -1.979 |
| H      |     |   |   |         |        |        |
| HETATM | 307 | C | 0 | -2.162  | -7.574 | -2.399 |
| C      |     |   |   |         |        |        |
| HETATM | 308 | H | 0 | -2.502  | -8.297 | -2.914 |
| H      |     |   |   |         |        |        |
| HETATM | 309 | C | 0 | -0.743  | -7.428 | -2.241 |
| C      |     |   |   |         |        |        |
| HETATM | 310 | C | 0 | 0.170   | -8.295 | -2.842 |
| C      |     |   |   |         |        |        |
| HETATM | 311 | H | 0 | -0.147  | -9.007 | -3.387 |
| H      |     |   |   |         |        |        |
| HETATM | 312 | C | 0 | 1.524   | -8.129 | -2.653 |
| C      |     |   |   |         |        |        |
| HETATM | 313 | H | 0 | 2.135   | -8.738 | -3.053 |
| H      |     |   |   |         |        |        |
| HETATM | 314 | C | 0 | 1.998   | -7.078 | -1.884 |
| C      |     |   |   |         |        |        |
| HETATM | 315 | H | 0 | 2.934   | -6.962 | -1.773 |
| H      |     |   |   |         |        |        |
| HETATM | 316 | C | 0 | 1.130   | -6.202 | -1.278 |
| C      |     |   |   |         |        |        |
| HETATM | 317 | H | 0 | 1.466   | -5.485 | -0.752 |
| H      |     |   |   |         |        |        |
| HETATM | 318 | C | 0 | -0.281  | -6.371 | -1.442 |
| C      |     |   |   |         |        |        |
| HETATM | 319 | C | 0 | -1.193  | -5.498 | -0.836 |
| C      |     |   |   |         |        |        |
| HETATM | 320 | H | 0 | -0.873  | -4.793 | -0.285 |
| H      |     |   |   |         |        |        |
| HETATM | 321 | S | 0 | -11.905 | -2.101 | -1.003 |
| S      |     |   |   |         |        |        |
| HETATM | 322 | S | 0 | -6.382  | -0.161 | -4.068 |
| S      |     |   |   |         |        |        |
| HETATM | 323 | N | 0 | -8.463  | -4.045 | -1.640 |
| N      |     |   |   |         |        |        |
| HETATM | 324 | N | 0 | -9.501  | -2.008 | -0.203 |
| N      |     |   |   |         |        |        |
| HETATM | 325 | N | 0 | -10.127 | -0.991 | 0.466  |
| N      |     |   |   |         |        |        |
| HETATM | 326 | N | 0 | -6.916  | -1.495 | -1.685 |
| N      |     |   |   |         |        |        |
| HETATM | 327 | C | 0 | -7.923  | -5.019 | -2.358 |
| C      |     |   |   |         |        |        |
| HETATM | 328 | H | 0 | -6.995  | -5.196 | -2.258 |
| H      |     |   |   |         |        |        |
| HETATM | 329 | C | 0 | -6.708  | -0.940 | -2.680 |
| C      |     |   |   |         |        |        |
| HETATM | 330 | C | 0 | -8.650  | -5.790 | -3.247 |
| C      |     |   |   |         |        |        |
| HETATM | 331 | H | 0 | -8.224  | -6.480 | -3.742 |
| H      |     |   |   |         |        |        |



|        |     |    |   |         |         |        |
|--------|-----|----|---|---------|---------|--------|
| HETATM | 332 | C  | 0 | -9.985  | -5.552  | -3.407 |
| C      |     |    |   |         |         |        |
| HETATM | 333 | H  | 0 | -10.500 | -6.079  | -4.006 |
| H      |     |    |   |         |         |        |
| HETATM | 334 | C  | 0 | -10.577 | -4.527  | -2.685 |
| C      |     |    |   |         |         |        |
| HETATM | 335 | H  | 0 | -11.502 | -4.335  | -2.783 |
| H      |     |    |   |         |         |        |
| HETATM | 336 | C  | 0 | -9.786  | -3.786  | -1.812 |
| C      |     |    |   |         |         |        |
| HETATM | 337 | C  | 0 | -10.287 | -2.681  | -1.007 |
| C      |     |    |   |         |         |        |
| HETATM | 338 | C  | 0 | -11.406 | -0.918  | 0.158  |
| C      |     |    |   |         |         |        |
| HETATM | 339 | C  | 0 | -12.343 | 0.047   | 0.751  |
| C      |     |    |   |         |         |        |
| HETATM | 340 | C  | 0 | -11.866 | 1.100   | 1.555  |
| C      |     |    |   |         |         |        |
| HETATM | 341 | H  | 0 | -10.933 | 1.197   | 1.700  |
| H      |     |    |   |         |         |        |
| HETATM | 342 | C  | 0 | -12.732 | 1.974   | 2.120  |
| C      |     |    |   |         |         |        |
| HETATM | 343 | H  | 0 | -12.392 | 2.697   | 2.634  |
| H      |     |    |   |         |         |        |
| HETATM | 344 | C  | 0 | -14.151 | 1.830   | 1.961  |
| C      |     |    |   |         |         |        |
| HETATM | 345 | C  | 0 | -15.064 | 2.695   | 2.562  |
| C      |     |    |   |         |         |        |
| HETATM | 346 | H  | 0 | -14.747 | 3.407   | 3.108  |
| H      |     |    |   |         |         |        |
| HETATM | 347 | C  | 0 | -16.418 | 2.530   | 2.374  |
| C      |     |    |   |         |         |        |
| HETATM | 348 | H  | 0 | -17.029 | 3.138   | 2.773  |
| H      |     |    |   |         |         |        |
| HETATM | 349 | C  | 0 | -16.892 | 1.479   | 1.604  |
| C      |     |    |   |         |         |        |
| HETATM | 350 | H  | 0 | -17.828 | 1.363   | 1.494  |
| H      |     |    |   |         |         |        |
| HETATM | 351 | C  | 0 | -16.024 | 0.602   | 0.998  |
| C      |     |    |   |         |         |        |
| HETATM | 352 | H  | 0 | -16.360 | -0.114  | 0.472  |
| H      |     |    |   |         |         |        |
| HETATM | 353 | C  | 0 | -14.614 | 0.772   | 1.162  |
| C      |     |    |   |         |         |        |
| HETATM | 354 | C  | 0 | -13.701 | -0.102  | 0.557  |
| C      |     |    |   |         |         |        |
| HETATM | 355 | H  | 0 | -14.021 | -0.806  | 0.005  |
| H      |     |    |   |         |         |        |
| HETATM | 356 | Zn | 0 | -3.223  | -14.121 | 0.332  |
| Zn     |     |    |   |         |         |        |
| HETATM | 357 | S  | 0 | 1.235   | -14.818 | 1.195  |
| S      |     |    |   |         |         |        |
| HETATM | 358 | S  | 0 | -4.288  | -16.760 | 4.260  |
| S      |     |    |   |         |         |        |
| HETATM | 359 | N  | 0 | -2.207  | -12.874 | 1.832  |
| N      |     |    |   |         |         |        |

|        |     |   |   |        |         |        |
|--------|-----|---|---|--------|---------|--------|
| HETATM | 360 | N | 0 | -1.170 | -14.912 | 0.396  |
| N      |     |   |   |        |         |        |
| HETATM | 361 | N | 0 | -0.543 | -15.929 | -0.274 |
| N      |     |   |   |        |         |        |
| HETATM | 362 | N | 0 | -3.753 | -15.424 | 1.877  |
| N      |     |   |   |        |         |        |
| HETATM | 363 | C | 0 | -2.747 | -11.900 | 2.551  |
| C      |     |   |   |        |         |        |
| HETATM | 364 | H | 0 | -3.675 | -11.725 | 2.451  |
| H      |     |   |   |        |         |        |
| HETATM | 365 | C | 0 | -3.962 | -15.980 | 2.873  |
| C      |     |   |   |        |         |        |
| HETATM | 366 | C | 0 | -2.019 | -11.130 | 3.439  |
| C      |     |   |   |        |         |        |
| HETATM | 367 | H | 0 | -2.445 | -10.440 | 3.934  |
| H      |     |   |   |        |         |        |
| HETATM | 368 | C | 0 | -0.685 | -11.369 | 3.600  |
| C      |     |   |   |        |         |        |
| HETATM | 369 | H | 0 | -0.170 | -10.840 | 4.198  |
| H      |     |   |   |        |         |        |
| HETATM | 370 | C | 0 | -0.093 | -12.392 | 2.877  |
| C      |     |   |   |        |         |        |
| HETATM | 371 | H | 0 | 0.832  | -12.584 | 2.975  |
| H      |     |   |   |        |         |        |
| HETATM | 372 | C | 0 | -0.885 | -13.133 | 2.004  |
| C      |     |   |   |        |         |        |
| HETATM | 373 | C | 0 | -0.383 | -14.238 | 1.200  |
| C      |     |   |   |        |         |        |
| HETATM | 374 | C | 0 | 0.736  | -16.002 | 0.034  |
| C      |     |   |   |        |         |        |
| HETATM | 375 | C | 0 | 1.672  | -16.967 | -0.559 |
| C      |     |   |   |        |         |        |
| HETATM | 376 | C | 0 | 1.196  | -18.019 | -1.363 |
| C      |     |   |   |        |         |        |
| HETATM | 377 | H | 0 | 0.262  | -18.117 | -1.508 |
| H      |     |   |   |        |         |        |
| HETATM | 378 | C | 0 | 2.062  | -18.893 | -1.928 |
| C      |     |   |   |        |         |        |
| HETATM | 379 | H | 0 | 1.722  | -19.618 | -2.441 |
| H      |     |   |   |        |         |        |
| HETATM | 380 | C | 0 | 3.481  | -18.749 | -1.768 |
| C      |     |   |   |        |         |        |
| HETATM | 381 | C | 0 | 4.394  | -19.616 | -2.370 |
| C      |     |   |   |        |         |        |
| HETATM | 382 | H | 0 | 4.078  | -20.327 | -2.915 |
| H      |     |   |   |        |         |        |
| HETATM | 383 | C | 0 | 5.748  | -19.450 | -2.182 |
| C      |     |   |   |        |         |        |
| HETATM | 384 | H | 0 | 6.360  | -20.058 | -2.581 |
| H      |     |   |   |        |         |        |
| HETATM | 385 | C | 0 | 6.222  | -18.398 | -1.412 |
| C      |     |   |   |        |         |        |
| HETATM | 386 | H | 0 | 7.159  | -18.282 | -1.302 |
| H      |     |   |   |        |         |        |
| HETATM | 387 | C | 0 | 5.354  | -17.522 | -0.806 |
| C      |     |   |   |        |         |        |

|        |     |   |   |        |         |        |
|--------|-----|---|---|--------|---------|--------|
| HETATM | 388 | H | 0 | 5.689  | -16.806 | -0.279 |
| H      |     |   |   |        |         |        |
| HETATM | 389 | C | 0 | 3.944  | -17.691 | -0.970 |
| C      |     |   |   |        |         |        |
| HETATM | 390 | C | 0 | 3.031  | -16.818 | -0.364 |
| C      |     |   |   |        |         |        |
| HETATM | 391 | H | 0 | 3.350  | -16.113 | 0.188  |
| H      |     |   |   |        |         |        |
| HETATM | 392 | S | 0 | -7.681 | -13.422 | -0.530 |
| S      |     |   |   |        |         |        |
| HETATM | 393 | S | 0 | -2.158 | -11.481 | -3.596 |
| S      |     |   |   |        |         |        |
| HETATM | 394 | N | 0 | -4.239 | -15.366 | -1.169 |
| N      |     |   |   |        |         |        |
| HETATM | 395 | N | 0 | -5.276 | -13.328 | 0.269  |
| N      |     |   |   |        |         |        |
| HETATM | 396 | N | 0 | -5.903 | -12.312 | 0.939  |
| N      |     |   |   |        |         |        |
| HETATM | 397 | N | 0 | -2.693 | -12.816 | -1.212 |
| N      |     |   |   |        |         |        |
| HETATM | 398 | C | 0 | -3.699 | -16.340 | -1.886 |
| C      |     |   |   |        |         |        |
| HETATM | 399 | H | 0 | -2.771 | -16.516 | -1.787 |
| H      |     |   |   |        |         |        |
| HETATM | 400 | C | 0 | -2.483 | -12.260 | -2.208 |
| C      |     |   |   |        |         |        |
| HETATM | 401 | C | 0 | -4.425 | -17.110 | -2.775 |
| C      |     |   |   |        |         |        |
| HETATM | 402 | H | 0 | -4.001 | -17.800 | -3.269 |
| H      |     |   |   |        |         |        |
| HETATM | 403 | C | 0 | -5.760 | -16.872 | -2.936 |
| C      |     |   |   |        |         |        |
| HETATM | 404 | H | 0 | -6.276 | -17.400 | -3.534 |
| H      |     |   |   |        |         |        |
| HETATM | 405 | C | 0 | -6.352 | -15.848 | -2.212 |
| C      |     |   |   |        |         |        |
| HETATM | 406 | H | 0 | -7.278 | -15.656 | -2.311 |
| H      |     |   |   |        |         |        |
| HETATM | 407 | C | 0 | -5.561 | -15.107 | -1.340 |
| C      |     |   |   |        |         |        |
| HETATM | 408 | C | 0 | -6.062 | -14.002 | -0.535 |
| C      |     |   |   |        |         |        |
| HETATM | 409 | C | 0 | -7.182 | -12.239 | 0.631  |
| C      |     |   |   |        |         |        |
| HETATM | 410 | C | 0 | -8.118 | -11.273 | 1.223  |
| C      |     |   |   |        |         |        |
| HETATM | 411 | C | 0 | -7.642 | -10.221 | 2.027  |
| C      |     |   |   |        |         |        |
| HETATM | 412 | H | 0 | -6.708 | -10.123 | 2.172  |
| H      |     |   |   |        |         |        |
| HETATM | 413 | C | 0 | -8.507 | -9.346  | 2.593  |
| C      |     |   |   |        |         |        |
| HETATM | 414 | H | 0 | -8.168 | -8.622  | 3.106  |
| H      |     |   |   |        |         |        |
| HETATM | 415 | C | 0 | -9.927 | -9.491  | 2.433  |
| C      |     |   |   |        |         |        |

|        |     |    |   |         |         |        |
|--------|-----|----|---|---------|---------|--------|
| HETATM | 416 | C  | 0 | -10.840 | -8.624  | 3.035  |
| C      |     |    |   |         |         |        |
| HETATM | 417 | H  | 0 | -10.524 | -7.913  | 3.579  |
| H      |     |    |   |         |         |        |
| HETATM | 418 | C  | 0 | -12.195 | -8.790  | 2.846  |
| C      |     |    |   |         |         |        |
| HETATM | 419 | H  | 0 | -12.806 | -8.183  | 3.246  |
| H      |     |    |   |         |         |        |
| HETATM | 420 | C  | 0 | -12.668 | -9.842  | 2.077  |
| C      |     |    |   |         |         |        |
| HETATM | 421 | H  | 0 | -13.605 | -9.958  | 1.966  |
| H      |     |    |   |         |         |        |
| HETATM | 422 | C  | 0 | -11.800 | -10.719 | 1.471  |
| C      |     |    |   |         |         |        |
| HETATM | 423 | H  | 0 | -12.135 | -11.435 | 0.944  |
| H      |     |    |   |         |         |        |
| HETATM | 424 | C  | 0 | -10.390 | -10.549 | 1.635  |
| C      |     |    |   |         |         |        |
| HETATM | 425 | C  | 0 | -9.476  | -11.423 | 1.029  |
| C      |     |    |   |         |         |        |
| HETATM | 426 | H  | 0 | -9.796  | -12.127 | 0.477  |
| H      |     |    |   |         |         |        |
| HETATM | 427 | Zn | 0 | -4.224  | 11.320  | -0.472 |
| Zn     |     |    |   |         |         |        |
| HETATM | 428 | S  | 0 | 0.234   | 10.622  | 0.391  |
| S      |     |    |   |         |         |        |
| HETATM | 429 | S  | 0 | -5.289  | 8.681   | 3.456  |
| S      |     |    |   |         |         |        |
| HETATM | 430 | N  | 0 | -3.208  | 12.567  | 1.028  |
| N      |     |    |   |         |         |        |
| HETATM | 431 | N  | 0 | -2.172  | 10.529  | -0.408 |
| N      |     |    |   |         |         |        |
| HETATM | 432 | N  | 0 | -1.544  | 9.512   | -1.078 |
| N      |     |    |   |         |         |        |
| HETATM | 433 | N  | 0 | -4.754  | 10.016  | 1.073  |
| N      |     |    |   |         |         |        |
| HETATM | 434 | C  | 0 | -3.748  | 13.540  | 1.747  |
| C      |     |    |   |         |         |        |
| HETATM | 435 | H  | 0 | -4.676  | 13.716  | 1.647  |
| H      |     |    |   |         |         |        |
| HETATM | 436 | C  | 0 | -4.963  | 9.461   | 2.068  |
| C      |     |    |   |         |         |        |
| HETATM | 437 | C  | 0 | -3.021  | 14.310  | 2.635  |
| C      |     |    |   |         |         |        |
| HETATM | 438 | H  | 0 | -3.447  | 15.001  | 3.130  |
| H      |     |    |   |         |         |        |
| HETATM | 439 | C  | 0 | -1.686  | 14.072  | 2.795  |
| C      |     |    |   |         |         |        |
| HETATM | 440 | H  | 0 | -1.171  | 14.600  | 3.394  |
| H      |     |    |   |         |         |        |
| HETATM | 441 | C  | 0 | -1.095  | 13.048  | 2.073  |
| C      |     |    |   |         |         |        |
| HETATM | 442 | H  | 0 | -0.169  | 12.856  | 2.171  |
| H      |     |    |   |         |         |        |
| HETATM | 443 | C  | 0 | -1.886  | 12.308  | 1.200  |
| C      |     |    |   |         |         |        |

|        |     |   |   |        |        |        |
|--------|-----|---|---|--------|--------|--------|
| HETATM | 444 | C | 0 | -1.385 | 11.202 | 0.395  |
| C      |     |   |   |        |        |        |
| HETATM | 445 | C | 0 | -0.265 | 9.439  | -0.770 |
| C      |     |   |   |        |        |        |
| HETATM | 446 | C | 0 | 0.671  | 8.473  | -1.363 |
| C      |     |   |   |        |        |        |
| HETATM | 447 | C | 0 | 0.195  | 7.421  | -2.166 |
| C      |     |   |   |        |        |        |
| HETATM | 448 | H | 0 | -0.739 | 7.323  | -2.312 |
| H      |     |   |   |        |        |        |
| HETATM | 449 | C | 0 | 1.061  | 6.547  | -2.732 |
| C      |     |   |   |        |        |        |
| HETATM | 450 | H | 0 | 0.721  | 5.823  | -3.245 |
| H      |     |   |   |        |        |        |
| HETATM | 451 | C | 0 | 2.480  | 6.692  | -2.573 |
| C      |     |   |   |        |        |        |
| HETATM | 452 | C | 0 | 3.392  | 5.825  | -3.174 |
| C      |     |   |   |        |        |        |
| HETATM | 453 | H | 0 | 3.077  | 5.114  | -3.720 |
| H      |     |   |   |        |        |        |
| HETATM | 454 | C | 0 | 4.747  | 5.991  | -2.986 |
| C      |     |   |   |        |        |        |
| HETATM | 455 | H | 0 | 5.358  | 5.383  | -3.385 |
| H      |     |   |   |        |        |        |
| HETATM | 456 | C | 0 | 5.221  | 7.042  | -2.216 |
| C      |     |   |   |        |        |        |
| HETATM | 457 | H | 0 | 6.157  | 7.158  | -2.106 |
| H      |     |   |   |        |        |        |
| HETATM | 458 | C | 0 | 4.352  | 7.919  | -1.610 |
| C      |     |   |   |        |        |        |
| HETATM | 459 | H | 0 | 4.688  | 8.635  | -1.084 |
| H      |     |   |   |        |        |        |
| HETATM | 460 | C | 0 | 2.943  | 7.749  | -1.774 |
| C      |     |   |   |        |        |        |
| HETATM | 461 | C | 0 | 2.030  | 8.623  | -1.169 |
| C      |     |   |   |        |        |        |
| HETATM | 462 | H | 0 | 2.349  | 9.328  | -0.617 |
| H      |     |   |   |        |        |        |
| HETATM | 463 | S | 0 | -8.683 | 12.019 | -1.334 |
| S      |     |   |   |        |        |        |
| HETATM | 464 | S | 0 | -3.160 | 13.960 | -4.401 |
| S      |     |   |   |        |        |        |
| HETATM | 465 | N | 0 | -5.241 | 10.075 | -1.973 |
| N      |     |   |   |        |        |        |
| HETATM | 466 | N | 0 | -6.277 | 12.111 | -0.536 |
| N      |     |   |   |        |        |        |
| HETATM | 467 | N | 0 | -6.904 | 13.129 | 0.135  |
| N      |     |   |   |        |        |        |
| HETATM | 468 | N | 0 | -3.694 | 12.625 | -2.017 |
| N      |     |   |   |        |        |        |
| HETATM | 469 | C | 0 | -4.701 | 9.101  | -2.690 |
| C      |     |   |   |        |        |        |
| HETATM | 470 | H | 0 | -3.772 | 8.925  | -2.591 |
| H      |     |   |   |        |        |        |
| HETATM | 471 | C | 0 | -3.486 | 13.180 | -3.012 |
| C      |     |   |   |        |        |        |

|        |     |    |   |         |        |        |
|--------|-----|----|---|---------|--------|--------|
| HETATM | 472 | C  | 0 | -5.427  | 8.331  | -3.579 |
| C      |     |    |   |         |        |        |
| HETATM | 473 | H  | 0 | -5.002  | 7.640  | -4.073 |
| H      |     |    |   |         |        |        |
| HETATM | 474 | C  | 0 | -6.761  | 8.569  | -3.739 |
| C      |     |    |   |         |        |        |
| HETATM | 475 | H  | 0 | -7.277  | 8.041  | -4.338 |
| H      |     |    |   |         |        |        |
| HETATM | 476 | C  | 0 | -7.353  | 9.592  | -3.016 |
| C      |     |    |   |         |        |        |
| HETATM | 477 | H  | 0 | -8.280  | 9.785  | -3.115 |
| H      |     |    |   |         |        |        |
| HETATM | 478 | C  | 0 | -6.562  | 10.333 | -2.145 |
| C      |     |    |   |         |        |        |
| HETATM | 479 | C  | 0 | -7.064  | 11.439 | -1.339 |
| C      |     |    |   |         |        |        |
| HETATM | 480 | C  | 0 | -8.183  | 13.202 | -0.173 |
| C      |     |    |   |         |        |        |
| HETATM | 481 | C  | 0 | -9.120  | 14.168 | 0.419  |
| C      |     |    |   |         |        |        |
| HETATM | 482 | C  | 0 | -8.643  | 15.220 | 1.222  |
| C      |     |    |   |         |        |        |
| HETATM | 483 | H  | 0 | -7.709  | 15.318 | 1.367  |
| H      |     |    |   |         |        |        |
| HETATM | 484 | C  | 0 | -9.509  | 16.094 | 1.788  |
| C      |     |    |   |         |        |        |
| HETATM | 485 | H  | 0 | -9.169  | 16.818 | 2.302  |
| H      |     |    |   |         |        |        |
| HETATM | 486 | C  | 0 | -10.929 | 15.950 | 1.629  |
| C      |     |    |   |         |        |        |
| HETATM | 487 | C  | 0 | -11.841 | 16.816 | 2.230  |
| C      |     |    |   |         |        |        |
| HETATM | 488 | H  | 0 | -11.525 | 17.527 | 2.775  |
| H      |     |    |   |         |        |        |
| HETATM | 489 | C  | 0 | -13.196 | 16.650 | 2.042  |
| C      |     |    |   |         |        |        |
| HETATM | 490 | H  | 0 | -13.807 | 17.258 | 2.441  |
| H      |     |    |   |         |        |        |
| HETATM | 491 | C  | 0 | -13.670 | 15.599 | 1.272  |
| C      |     |    |   |         |        |        |
| HETATM | 492 | H  | 0 | -14.606 | 15.483 | 1.162  |
| H      |     |    |   |         |        |        |
| HETATM | 493 | C  | 0 | -12.801 | 14.722 | 0.666  |
| C      |     |    |   |         |        |        |
| HETATM | 494 | H  | 0 | -13.136 | 14.006 | 0.140  |
| H      |     |    |   |         |        |        |
| HETATM | 495 | C  | 0 | -11.391 | 14.892 | 0.830  |
| C      |     |    |   |         |        |        |
| HETATM | 496 | C  | 0 | -10.479 | 14.018 | 0.225  |
| C      |     |    |   |         |        |        |
| HETATM | 497 | H  | 0 | -10.797 | 13.313 | -0.327 |
| H      |     |    |   |         |        |        |
| HETATM | 498 | Fe | 0 | 0.000   | 0.000  | -0.000 |
| Fe     |     |    |   |         |        |        |
| HETATM | 499 | S  | 0 | 4.518   | -0.716 | 0.897  |
| S      |     |    |   |         |        |        |

|        |     |   |   |        |        |        |
|--------|-----|---|---|--------|--------|--------|
| HETATM | 500 | S | 0 | -1.027 | -2.848 | 3.934  |
| S      |     |   |   |        |        |        |
| HETATM | 501 | N | 0 | 1.006  | 1.320  | 1.416  |
| N      |     |   |   |        |        |        |
| HETATM | 502 | N | 0 | 2.035  | -0.843 | 0.087  |
| N      |     |   |   |        |        |        |
| HETATM | 503 | N | 0 | 2.671  | -1.899 | -0.581 |
| N      |     |   |   |        |        |        |
| HETATM | 504 | N | 0 | -0.539 | -1.213 | 1.600  |
| N      |     |   |   |        |        |        |
| HETATM | 505 | C | 0 | 0.426  | 2.355  | 2.067  |
| C      |     |   |   |        |        |        |
| HETATM | 506 | H | 0 | -0.621 | 2.542  | 1.820  |
| H      |     |   |   |        |        |        |
| HETATM | 507 | C | 0 | -0.725 | -1.885 | 2.567  |
| C      |     |   |   |        |        |        |
| HETATM | 508 | C | 0 | 1.142  | 3.138  | 3.006  |
| C      |     |   |   |        |        |        |
| HETATM | 509 | H | 0 | 0.650  | 3.969  | 3.509  |
| H      |     |   |   |        |        |        |
| HETATM | 510 | C | 0 | 2.493  | 2.817  | 3.273  |
| C      |     |   |   |        |        |        |
| HETATM | 511 | H | 0 | 3.072  | 3.398  | 3.992  |
| H      |     |   |   |        |        |        |
| HETATM | 512 | C | 0 | 3.098  | 1.729  | 2.597  |
| C      |     |   |   |        |        |        |
| HETATM | 513 | H | 0 | 4.128  | 1.446  | 2.809  |
| H      |     |   |   |        |        |        |
| HETATM | 514 | C | 0 | 2.313  | 1.009  | 1.669  |
| C      |     |   |   |        |        |        |
| HETATM | 515 | C | 0 | 2.829  | -0.142 | 0.890  |
| C      |     |   |   |        |        |        |
| HETATM | 516 | C | 0 | 3.964  | -1.983 | -0.282 |
| C      |     |   |   |        |        |        |
| HETATM | 517 | C | 0 | 4.916  | -2.955 | -0.856 |
| C      |     |   |   |        |        |        |
| HETATM | 518 | C | 0 | 4.428  | -4.064 | -1.642 |
| C      |     |   |   |        |        |        |
| HETATM | 519 | H | 0 | 3.354  | -4.185 | -1.777 |
| H      |     |   |   |        |        |        |
| HETATM | 520 | C | 0 | 5.330  | -4.951 | -2.226 |
| C      |     |   |   |        |        |        |
| HETATM | 521 | H | 0 | 4.976  | -5.795 | -2.821 |
| H      |     |   |   |        |        |        |
| HETATM | 522 | C | 0 | 6.755  | -4.764 | -2.074 |
| C      |     |   |   |        |        |        |
| HETATM | 523 | C | 0 | 7.712  | -5.645 | -2.695 |
| C      |     |   |   |        |        |        |
| HETATM | 524 | H | 0 | 7.342  | -6.474 | -3.300 |
| H      |     |   |   |        |        |        |
| HETATM | 525 | C | 0 | 9.083  | -5.447 | -2.509 |
| C      |     |   |   |        |        |        |
| HETATM | 526 | H | 0 | 9.810  | -6.102 | -2.991 |
| H      |     |   |   |        |        |        |
| HETATM | 527 | C | 0 | 9.563  | -4.356 | -1.698 |
| C      |     |   |   |        |        |        |

|        |     |   |   |        |        |        |
|--------|-----|---|---|--------|--------|--------|
| HETATM | 528 | H | 0 | 10.639 | -4.224 | -1.578 |
| H      |     |   |   |        |        |        |
| HETATM | 529 | C | 0 | 8.660  | -3.480 | -1.093 |
| C      |     |   |   |        |        |        |
| HETATM | 530 | H | 0 | 9.010  | -2.635 | -0.497 |
| H      |     |   |   |        |        |        |
| HETATM | 531 | C | 0 | 7.240  | -3.668 | -1.265 |
| C      |     |   |   |        |        |        |
| HETATM | 532 | C | 0 | 6.292  | -2.782 | -0.660 |
| C      |     |   |   |        |        |        |
| HETATM | 533 | H | 0 | 6.674  | -1.961 | -0.051 |
| H      |     |   |   |        |        |        |
| HETATM | 534 | S | 0 | -4.518 | 0.716  | -0.897 |
| S      |     |   |   |        |        |        |
| HETATM | 535 | S | 0 | 1.027  | 2.848  | -3.935 |
| S      |     |   |   |        |        |        |
| HETATM | 536 | N | 0 | -1.006 | -1.320 | -1.416 |
| N      |     |   |   |        |        |        |
| HETATM | 537 | N | 0 | -2.035 | 0.843  | -0.088 |
| N      |     |   |   |        |        |        |
| HETATM | 538 | N | 0 | -2.670 | 1.899  | 0.581  |
| N      |     |   |   |        |        |        |
| HETATM | 539 | N | 0 | 0.539  | 1.213  | -1.600 |
| N      |     |   |   |        |        |        |
| HETATM | 540 | C | 0 | -0.426 | -2.355 | -2.067 |
| C      |     |   |   |        |        |        |
| HETATM | 541 | H | 0 | 0.621  | -2.542 | -1.820 |
| H      |     |   |   |        |        |        |
| HETATM | 542 | C | 0 | 0.725  | 1.885  | -2.567 |
| C      |     |   |   |        |        |        |
| HETATM | 543 | C | 0 | -1.142 | -3.138 | -3.006 |
| C      |     |   |   |        |        |        |
| HETATM | 544 | H | 0 | -0.650 | -3.969 | -3.509 |
| H      |     |   |   |        |        |        |
| HETATM | 545 | C | 0 | -2.493 | -2.817 | -3.273 |
| C      |     |   |   |        |        |        |
| HETATM | 546 | H | 0 | -3.071 | -3.398 | -3.992 |
| H      |     |   |   |        |        |        |
| HETATM | 547 | C | 0 | -3.098 | -1.729 | -2.597 |
| C      |     |   |   |        |        |        |
| HETATM | 548 | H | 0 | -4.128 | -1.446 | -2.810 |
| H      |     |   |   |        |        |        |
| HETATM | 549 | C | 0 | -2.313 | -1.009 | -1.669 |
| C      |     |   |   |        |        |        |
| HETATM | 550 | C | 0 | -2.829 | 0.142  | -0.890 |
| C      |     |   |   |        |        |        |
| HETATM | 551 | C | 0 | -3.964 | 1.983  | 0.282  |
| C      |     |   |   |        |        |        |
| HETATM | 552 | C | 0 | -4.916 | 2.955  | 0.856  |
| C      |     |   |   |        |        |        |
| HETATM | 553 | C | 0 | -4.428 | 4.064  | 1.642  |
| C      |     |   |   |        |        |        |
| HETATM | 554 | H | 0 | -3.354 | 4.185  | 1.777  |
| H      |     |   |   |        |        |        |
| HETATM | 555 | C | 0 | -5.330 | 4.951  | 2.225  |
| C      |     |   |   |        |        |        |



|        |     |    |   |         |         |        |
|--------|-----|----|---|---------|---------|--------|
| HETATM | 556 | H  | 0 | -4.977  | 5.795   | 2.820  |
| H      |     |    |   |         |         |        |
| HETATM | 557 | C  | 0 | -6.755  | 4.764   | 2.074  |
| C      |     |    |   |         |         |        |
| HETATM | 558 | C  | 0 | -7.712  | 5.645   | 2.695  |
| C      |     |    |   |         |         |        |
| HETATM | 559 | H  | 0 | -7.342  | 6.474   | 3.299  |
| H      |     |    |   |         |         |        |
| HETATM | 560 | C  | 0 | -9.083  | 5.446   | 2.509  |
| C      |     |    |   |         |         |        |
| HETATM | 561 | H  | 0 | -9.810  | 6.102   | 2.991  |
| H      |     |    |   |         |         |        |
| HETATM | 562 | C  | 0 | -9.563  | 4.356   | 1.698  |
| C      |     |    |   |         |         |        |
| HETATM | 563 | H  | 0 | -10.639 | 4.224   | 1.578  |
| H      |     |    |   |         |         |        |
| HETATM | 564 | C  | 0 | -8.660  | 3.480   | 1.093  |
| C      |     |    |   |         |         |        |
| HETATM | 565 | H  | 0 | -9.010  | 2.634   | 0.498  |
| H      |     |    |   |         |         |        |
| HETATM | 566 | C  | 0 | -7.240  | 3.668   | 1.265  |
| C      |     |    |   |         |         |        |
| HETATM | 567 | C  | 0 | -6.292  | 2.781   | 0.660  |
| C      |     |    |   |         |         |        |
| HETATM | 568 | H  | 0 | -6.674  | 1.960   | 0.051  |
| H      |     |    |   |         |         |        |
| HETATM | 569 | Zn | 0 | 4.224   | -11.320 | 0.472  |
| Zn     |     |    |   |         |         |        |
| HETATM | 570 | S  | 0 | 8.683   | -12.019 | 1.334  |
| S      |     |    |   |         |         |        |
| HETATM | 571 | S  | 0 | 3.160   | -13.959 | 4.401  |
| S      |     |    |   |         |         |        |
| HETATM | 572 | N  | 0 | 5.241   | -10.075 | 1.973  |
| N      |     |    |   |         |         |        |
| HETATM | 573 | N  | 0 | 6.277   | -12.111 | 0.536  |
| N      |     |    |   |         |         |        |
| HETATM | 574 | N  | 0 | 6.904   | -13.129 | -0.135 |
| N      |     |    |   |         |         |        |
| HETATM | 575 | N  | 0 | 3.694   | -12.625 | 2.017  |
| N      |     |    |   |         |         |        |
| HETATM | 576 | C  | 0 | 4.701   | -9.101  | 2.690  |
| C      |     |    |   |         |         |        |
| HETATM | 577 | H  | 0 | 3.772   | -8.925  | 2.591  |
| H      |     |    |   |         |         |        |
| HETATM | 578 | C  | 0 | 3.486   | -13.180 | 3.012  |
| C      |     |    |   |         |         |        |
| HETATM | 579 | C  | 0 | 5.427   | -8.331  | 3.579  |
| C      |     |    |   |         |         |        |
| HETATM | 580 | H  | 0 | 5.002   | -7.640  | 4.073  |
| H      |     |    |   |         |         |        |
| HETATM | 581 | C  | 0 | 6.761   | -8.569  | 3.739  |
| C      |     |    |   |         |         |        |
| HETATM | 582 | H  | 0 | 7.277   | -8.041  | 4.338  |
| H      |     |    |   |         |         |        |
| HETATM | 583 | C  | 0 | 7.353   | -9.592  | 3.016  |
| C      |     |    |   |         |         |        |

|        |     |   |   |        |         |        |
|--------|-----|---|---|--------|---------|--------|
| HETATM | 584 | H | 0 | 8.280  | -9.785  | 3.115  |
| H      |     |   |   |        |         |        |
| HETATM | 585 | C | 0 | 6.562  | -10.333 | 2.145  |
| C      |     |   |   |        |         |        |
| HETATM | 586 | C | 0 | 7.064  | -11.439 | 1.339  |
| C      |     |   |   |        |         |        |
| HETATM | 587 | C | 0 | 8.183  | -13.202 | 0.173  |
| C      |     |   |   |        |         |        |
| HETATM | 588 | C | 0 | 9.120  | -14.168 | -0.419 |
| C      |     |   |   |        |         |        |
| HETATM | 589 | C | 0 | 8.643  | -15.220 | -1.222 |
| C      |     |   |   |        |         |        |
| HETATM | 590 | H | 0 | 7.709  | -15.318 | -1.367 |
| H      |     |   |   |        |         |        |
| HETATM | 591 | C | 0 | 9.509  | -16.094 | -1.788 |
| C      |     |   |   |        |         |        |
| HETATM | 592 | H | 0 | 9.169  | -16.818 | -2.302 |
| H      |     |   |   |        |         |        |
| HETATM | 593 | C | 0 | 10.929 | -15.950 | -1.629 |
| C      |     |   |   |        |         |        |
| HETATM | 594 | C | 0 | 11.841 | -16.816 | -2.230 |
| C      |     |   |   |        |         |        |
| HETATM | 595 | H | 0 | 11.525 | -17.527 | -2.775 |
| H      |     |   |   |        |         |        |
| HETATM | 596 | C | 0 | 13.196 | -16.650 | -2.042 |
| C      |     |   |   |        |         |        |
| HETATM | 597 | H | 0 | 13.807 | -17.258 | -2.441 |
| H      |     |   |   |        |         |        |
| HETATM | 598 | C | 0 | 13.670 | -15.599 | -1.272 |
| C      |     |   |   |        |         |        |
| HETATM | 599 | H | 0 | 14.606 | -15.483 | -1.162 |
| H      |     |   |   |        |         |        |
| HETATM | 600 | C | 0 | 12.801 | -14.722 | -0.666 |
| C      |     |   |   |        |         |        |
| HETATM | 601 | H | 0 | 13.136 | -14.006 | -0.140 |
| H      |     |   |   |        |         |        |
| HETATM | 602 | C | 0 | 11.391 | -14.892 | -0.830 |
| C      |     |   |   |        |         |        |
| HETATM | 603 | C | 0 | 10.479 | -14.018 | -0.225 |
| C      |     |   |   |        |         |        |
| HETATM | 604 | H | 0 | 10.797 | -13.313 | 0.327  |
| H      |     |   |   |        |         |        |
| HETATM | 605 | S | 0 | -0.234 | -10.622 | -0.391 |
| S      |     |   |   |        |         |        |
| HETATM | 606 | S | 0 | 5.289  | -8.681  | -3.456 |
| S      |     |   |   |        |         |        |
| HETATM | 607 | N | 0 | 3.208  | -12.567 | -1.028 |
| N      |     |   |   |        |         |        |
| HETATM | 608 | N | 0 | 2.172  | -10.529 | 0.408  |
| N      |     |   |   |        |         |        |
| HETATM | 609 | N | 0 | 1.544  | -9.512  | 1.078  |
| N      |     |   |   |        |         |        |
| HETATM | 610 | N | 0 | 4.754  | -10.016 | -1.073 |
| N      |     |   |   |        |         |        |
| HETATM | 611 | C | 0 | 3.748  | -13.540 | -1.747 |
| C      |     |   |   |        |         |        |

|        |     |   |   |        |         |        |
|--------|-----|---|---|--------|---------|--------|
| HETATM | 612 | H | 0 | 4.676  | -13.716 | -1.647 |
| H      |     |   |   |        |         |        |
| HETATM | 613 | C | 0 | 4.963  | -9.461  | -2.068 |
| C      |     |   |   |        |         |        |
| HETATM | 614 | C | 0 | 3.021  | -14.310 | -2.635 |
| C      |     |   |   |        |         |        |
| HETATM | 615 | H | 0 | 3.447  | -15.001 | -3.130 |
| H      |     |   |   |        |         |        |
| HETATM | 616 | C | 0 | 1.686  | -14.072 | -2.795 |
| C      |     |   |   |        |         |        |
| HETATM | 617 | H | 0 | 1.171  | -14.600 | -3.394 |
| H      |     |   |   |        |         |        |
| HETATM | 618 | C | 0 | 1.095  | -13.048 | -2.073 |
| C      |     |   |   |        |         |        |
| HETATM | 619 | H | 0 | 0.169  | -12.856 | -2.171 |
| H      |     |   |   |        |         |        |
| HETATM | 620 | C | 0 | 1.886  | -12.308 | -1.200 |
| C      |     |   |   |        |         |        |
| HETATM | 621 | C | 0 | 1.385  | -11.202 | -0.395 |
| C      |     |   |   |        |         |        |
| HETATM | 622 | C | 0 | 0.265  | -9.439  | 0.770  |
| C      |     |   |   |        |         |        |
| HETATM | 623 | C | 0 | -0.671 | -8.473  | 1.363  |
| C      |     |   |   |        |         |        |
| HETATM | 624 | C | 0 | -0.195 | -7.421  | 2.166  |
| C      |     |   |   |        |         |        |
| HETATM | 625 | H | 0 | 0.739  | -7.323  | 2.312  |
| H      |     |   |   |        |         |        |
| HETATM | 626 | C | 0 | -1.061 | -6.547  | 2.732  |
| C      |     |   |   |        |         |        |
| HETATM | 627 | H | 0 | -0.721 | -5.823  | 3.245  |
| H      |     |   |   |        |         |        |
| HETATM | 628 | C | 0 | -2.480 | -6.692  | 2.573  |
| C      |     |   |   |        |         |        |
| HETATM | 629 | C | 0 | -3.392 | -5.825  | 3.174  |
| C      |     |   |   |        |         |        |
| HETATM | 630 | H | 0 | -3.077 | -5.114  | 3.720  |
| H      |     |   |   |        |         |        |
| HETATM | 631 | C | 0 | -4.747 | -5.991  | 2.986  |
| C      |     |   |   |        |         |        |
| HETATM | 632 | H | 0 | -5.358 | -5.383  | 3.385  |
| H      |     |   |   |        |         |        |
| HETATM | 633 | C | 0 | -5.221 | -7.042  | 2.216  |
| C      |     |   |   |        |         |        |
| HETATM | 634 | H | 0 | -6.157 | -7.158  | 2.106  |
| H      |     |   |   |        |         |        |
| HETATM | 635 | C | 0 | -4.352 | -7.919  | 1.610  |
| C      |     |   |   |        |         |        |
| HETATM | 636 | H | 0 | -4.688 | -8.635  | 1.084  |
| H      |     |   |   |        |         |        |
| HETATM | 637 | C | 0 | -2.943 | -7.749  | 1.774  |
| C      |     |   |   |        |         |        |
| HETATM | 638 | C | 0 | -2.030 | -8.623  | 1.169  |
| C      |     |   |   |        |         |        |
| HETATM | 639 | H | 0 | -2.349 | -9.328  | 0.617  |
| H      |     |   |   |        |         |        |

|        |     |    |   |        |        |        |
|--------|-----|----|---|--------|--------|--------|
| HETATM | 640 | Zn | 0 | 3.223  | 14.121 | -0.332 |
| Zn     |     |    |   |        |        |        |
| HETATM | 641 | S  | 0 | 7.681  | 13.422 | 0.530  |
| S      |     |    |   |        |        |        |
| HETATM | 642 | S  | 0 | 2.158  | 11.481 | 3.596  |
| S      |     |    |   |        |        |        |
| HETATM | 643 | N  | 0 | 4.239  | 15.366 | 1.169  |
| N      |     |    |   |        |        |        |
| HETATM | 644 | N  | 0 | 5.276  | 13.329 | -0.269 |
| N      |     |    |   |        |        |        |
| HETATM | 645 | N  | 0 | 5.903  | 12.312 | -0.939 |
| N      |     |    |   |        |        |        |
| HETATM | 646 | N  | 0 | 2.693  | 12.816 | 1.212  |
| N      |     |    |   |        |        |        |
| HETATM | 647 | C  | 0 | 3.699  | 16.340 | 1.886  |
| C      |     |    |   |        |        |        |
| HETATM | 648 | H  | 0 | 2.771  | 16.516 | 1.787  |
| H      |     |    |   |        |        |        |
| HETATM | 649 | C  | 0 | 2.483  | 12.260 | 2.208  |
| C      |     |    |   |        |        |        |
| HETATM | 650 | C  | 0 | 4.425  | 17.110 | 2.775  |
| C      |     |    |   |        |        |        |
| HETATM | 651 | H  | 0 | 4.001  | 17.800 | 3.269  |
| H      |     |    |   |        |        |        |
| HETATM | 652 | C  | 0 | 5.760  | 16.872 | 2.936  |
| C      |     |    |   |        |        |        |
| HETATM | 653 | H  | 0 | 6.276  | 17.400 | 3.534  |
| H      |     |    |   |        |        |        |
| HETATM | 654 | C  | 0 | 6.352  | 15.848 | 2.212  |
| C      |     |    |   |        |        |        |
| HETATM | 655 | H  | 0 | 7.278  | 15.656 | 2.311  |
| H      |     |    |   |        |        |        |
| HETATM | 656 | C  | 0 | 5.561  | 15.107 | 1.340  |
| C      |     |    |   |        |        |        |
| HETATM | 657 | C  | 0 | 6.062  | 14.002 | 0.535  |
| C      |     |    |   |        |        |        |
| HETATM | 658 | C  | 0 | 7.182  | 12.239 | -0.631 |
| C      |     |    |   |        |        |        |
| HETATM | 659 | C  | 0 | 8.118  | 11.273 | -1.223 |
| C      |     |    |   |        |        |        |
| HETATM | 660 | C  | 0 | 7.642  | 10.221 | -2.027 |
| C      |     |    |   |        |        |        |
| HETATM | 661 | H  | 0 | 6.708  | 10.123 | -2.172 |
| H      |     |    |   |        |        |        |
| HETATM | 662 | C  | 0 | 8.507  | 9.346  | -2.593 |
| C      |     |    |   |        |        |        |
| HETATM | 663 | H  | 0 | 8.168  | 8.622  | -3.106 |
| H      |     |    |   |        |        |        |
| HETATM | 664 | C  | 0 | 9.927  | 9.491  | -2.433 |
| C      |     |    |   |        |        |        |
| HETATM | 665 | C  | 0 | 10.840 | 8.624  | -3.035 |
| C      |     |    |   |        |        |        |
| HETATM | 666 | H  | 0 | 10.524 | 7.913  | -3.579 |
| H      |     |    |   |        |        |        |
| HETATM | 667 | C  | 0 | 12.195 | 8.790  | -2.846 |
| C      |     |    |   |        |        |        |

|        |     |   |   |        |        |        |
|--------|-----|---|---|--------|--------|--------|
| HETATM | 668 | H | 0 | 12.806 | 8.183  | -3.246 |
| H      |     |   |   |        |        |        |
| HETATM | 669 | C | 0 | 12.668 | 9.842  | -2.077 |
| C      |     |   |   |        |        |        |
| HETATM | 670 | H | 0 | 13.605 | 9.958  | -1.966 |
| H      |     |   |   |        |        |        |
| HETATM | 671 | C | 0 | 11.800 | 10.719 | -1.471 |
| C      |     |   |   |        |        |        |
| HETATM | 672 | H | 0 | 12.135 | 11.435 | -0.944 |
| H      |     |   |   |        |        |        |
| HETATM | 673 | C | 0 | 10.390 | 10.549 | -1.635 |
| C      |     |   |   |        |        |        |
| HETATM | 674 | C | 0 | 9.476  | 11.423 | -1.029 |
| C      |     |   |   |        |        |        |
| HETATM | 675 | H | 0 | 9.796  | 12.127 | -0.477 |
| H      |     |   |   |        |        |        |
| HETATM | 676 | S | 0 | -1.235 | 14.818 | -1.195 |
| S      |     |   |   |        |        |        |
| HETATM | 677 | S | 0 | 4.288  | 16.760 | -4.260 |
| S      |     |   |   |        |        |        |
| HETATM | 678 | N | 0 | 2.207  | 12.874 | -1.832 |
| N      |     |   |   |        |        |        |
| HETATM | 679 | N | 0 | 1.170  | 14.912 | -0.396 |
| N      |     |   |   |        |        |        |
| HETATM | 680 | N | 0 | 0.543  | 15.929 | 0.274  |
| N      |     |   |   |        |        |        |
| HETATM | 681 | N | 0 | 3.753  | 15.424 | -1.877 |
| N      |     |   |   |        |        |        |
| HETATM | 682 | C | 0 | 2.747  | 11.900 | -2.551 |
| C      |     |   |   |        |        |        |
| HETATM | 683 | H | 0 | 3.675  | 11.725 | -2.451 |
| H      |     |   |   |        |        |        |
| HETATM | 684 | C | 0 | 3.962  | 15.980 | -2.873 |
| C      |     |   |   |        |        |        |
| HETATM | 685 | C | 0 | 2.019  | 11.130 | -3.439 |
| C      |     |   |   |        |        |        |
| HETATM | 686 | H | 0 | 2.445  | 10.440 | -3.934 |
| H      |     |   |   |        |        |        |
| HETATM | 687 | C | 0 | 0.685  | 11.369 | -3.600 |
| C      |     |   |   |        |        |        |
| HETATM | 688 | H | 0 | 0.170  | 10.840 | -4.198 |
| H      |     |   |   |        |        |        |
| HETATM | 689 | C | 0 | 0.093  | 12.392 | -2.877 |
| C      |     |   |   |        |        |        |
| HETATM | 690 | H | 0 | -0.832 | 12.584 | -2.975 |
| H      |     |   |   |        |        |        |
| HETATM | 691 | C | 0 | 0.885  | 13.133 | -2.004 |
| C      |     |   |   |        |        |        |
| HETATM | 692 | C | 0 | 0.383  | 14.238 | -1.200 |
| C      |     |   |   |        |        |        |
| HETATM | 693 | C | 0 | -0.736 | 16.002 | -0.034 |
| C      |     |   |   |        |        |        |
| HETATM | 694 | C | 0 | -1.672 | 16.967 | 0.559  |
| C      |     |   |   |        |        |        |
| HETATM | 695 | C | 0 | -1.196 | 18.019 | 1.363  |
| C      |     |   |   |        |        |        |

|        |     |    |   |        |        |        |
|--------|-----|----|---|--------|--------|--------|
| HETATM | 696 | H  | 0 | -0.262 | 18.117 | 1.508  |
| H      |     |    |   |        |        |        |
| HETATM | 697 | C  | 0 | -2.062 | 18.893 | 1.928  |
| C      |     |    |   |        |        |        |
| HETATM | 698 | H  | 0 | -1.722 | 19.618 | 2.441  |
| H      |     |    |   |        |        |        |
| HETATM | 699 | C  | 0 | -3.481 | 18.749 | 1.768  |
| C      |     |    |   |        |        |        |
| HETATM | 700 | C  | 0 | -4.394 | 19.616 | 2.370  |
| C      |     |    |   |        |        |        |
| HETATM | 701 | H  | 0 | -4.078 | 20.327 | 2.915  |
| H      |     |    |   |        |        |        |
| HETATM | 702 | C  | 0 | -5.748 | 19.450 | 2.182  |
| C      |     |    |   |        |        |        |
| HETATM | 703 | H  | 0 | -6.360 | 20.058 | 2.581  |
| H      |     |    |   |        |        |        |
| HETATM | 704 | C  | 0 | -6.222 | 18.398 | 1.412  |
| C      |     |    |   |        |        |        |
| HETATM | 705 | H  | 0 | -7.159 | 18.282 | 1.302  |
| H      |     |    |   |        |        |        |
| HETATM | 706 | C  | 0 | -5.354 | 17.522 | 0.806  |
| C      |     |    |   |        |        |        |
| HETATM | 707 | H  | 0 | -5.689 | 16.806 | 0.279  |
| H      |     |    |   |        |        |        |
| HETATM | 708 | C  | 0 | -3.944 | 17.691 | 0.970  |
| C      |     |    |   |        |        |        |
| HETATM | 709 | C  | 0 | -3.031 | 16.818 | 0.364  |
| C      |     |    |   |        |        |        |
| HETATM | 710 | H  | 0 | -3.350 | 16.113 | -0.188 |
| H      |     |    |   |        |        |        |
| HETATM | 711 | Zn | 0 | 7.447  | 2.800  | 0.140  |
| Zn     |     |    |   |        |        |        |
| HETATM | 712 | S  | 0 | 11.905 | 2.101  | 1.003  |
| S      |     |    |   |        |        |        |
| HETATM | 713 | S  | 0 | 6.382  | 0.161  | 4.068  |
| S      |     |    |   |        |        |        |
| HETATM | 714 | N  | 0 | 8.463  | 4.045  | 1.640  |
| N      |     |    |   |        |        |        |
| HETATM | 715 | N  | 0 | 9.501  | 2.008  | 0.203  |
| N      |     |    |   |        |        |        |
| HETATM | 716 | N  | 0 | 10.127 | 0.991  | -0.466 |
| N      |     |    |   |        |        |        |
| HETATM | 717 | N  | 0 | 6.916  | 1.495  | 1.685  |
| N      |     |    |   |        |        |        |
| HETATM | 718 | C  | 0 | 7.923  | 5.019  | 2.358  |
| C      |     |    |   |        |        |        |
| HETATM | 719 | H  | 0 | 6.995  | 5.196  | 2.258  |
| H      |     |    |   |        |        |        |
| HETATM | 720 | C  | 0 | 6.708  | 0.940  | 2.680  |
| C      |     |    |   |        |        |        |
| HETATM | 721 | C  | 0 | 8.650  | 5.790  | 3.247  |
| C      |     |    |   |        |        |        |
| HETATM | 722 | H  | 0 | 8.224  | 6.480  | 3.742  |
| H      |     |    |   |        |        |        |
| HETATM | 723 | C  | 0 | 9.985  | 5.552  | 3.407  |
| C      |     |    |   |        |        |        |

|        |     |   |   |        |        |        |
|--------|-----|---|---|--------|--------|--------|
| HETATM | 724 | H | 0 | 10.500 | 6.079  | 4.006  |
| H      |     |   |   |        |        |        |
| HETATM | 725 | C | 0 | 10.577 | 4.527  | 2.685  |
| C      |     |   |   |        |        |        |
| HETATM | 726 | H | 0 | 11.502 | 4.335  | 2.783  |
| H      |     |   |   |        |        |        |
| HETATM | 727 | C | 0 | 9.786  | 3.786  | 1.812  |
| C      |     |   |   |        |        |        |
| HETATM | 728 | C | 0 | 10.287 | 2.682  | 1.007  |
| C      |     |   |   |        |        |        |
| HETATM | 729 | C | 0 | 11.406 | 0.918  | -0.158 |
| C      |     |   |   |        |        |        |
| HETATM | 730 | C | 0 | 12.343 | -0.047 | -0.751 |
| C      |     |   |   |        |        |        |
| HETATM | 731 | C | 0 | 11.866 | -1.100 | -1.555 |
| C      |     |   |   |        |        |        |
| HETATM | 732 | H | 0 | 10.933 | -1.197 | -1.700 |
| H      |     |   |   |        |        |        |
| HETATM | 733 | C | 0 | 12.732 | -1.974 | -2.120 |
| C      |     |   |   |        |        |        |
| HETATM | 734 | H | 0 | 12.392 | -2.697 | -2.634 |
| H      |     |   |   |        |        |        |
| HETATM | 735 | C | 0 | 14.151 | -1.830 | -1.961 |
| C      |     |   |   |        |        |        |
| HETATM | 736 | C | 0 | 15.064 | -2.695 | -2.562 |
| C      |     |   |   |        |        |        |
| HETATM | 737 | H | 0 | 14.747 | -3.407 | -3.108 |
| H      |     |   |   |        |        |        |
| HETATM | 738 | C | 0 | 16.418 | -2.530 | -2.374 |
| C      |     |   |   |        |        |        |
| HETATM | 739 | H | 0 | 17.029 | -3.138 | -2.773 |
| H      |     |   |   |        |        |        |
| HETATM | 740 | C | 0 | 16.892 | -1.479 | -1.604 |
| C      |     |   |   |        |        |        |
| HETATM | 741 | H | 0 | 17.828 | -1.363 | -1.494 |
| H      |     |   |   |        |        |        |
| HETATM | 742 | C | 0 | 16.024 | -0.602 | -0.998 |
| C      |     |   |   |        |        |        |
| HETATM | 743 | H | 0 | 16.360 | 0.114  | -0.472 |
| H      |     |   |   |        |        |        |
| HETATM | 744 | C | 0 | 14.614 | -0.772 | -1.162 |
| C      |     |   |   |        |        |        |
| HETATM | 745 | C | 0 | 13.701 | 0.102  | -0.557 |
| C      |     |   |   |        |        |        |
| HETATM | 746 | H | 0 | 14.021 | 0.806  | -0.005 |
| H      |     |   |   |        |        |        |
| HETATM | 747 | S | 0 | 2.988  | 3.498  | -0.723 |
| S      |     |   |   |        |        |        |
| HETATM | 748 | S | 0 | 8.512  | 5.439  | -3.789 |
| S      |     |   |   |        |        |        |
| HETATM | 749 | N | 0 | 6.431  | 1.554  | -1.361 |
| N      |     |   |   |        |        |        |
| HETATM | 750 | N | 0 | 5.394  | 3.591  | 0.076  |
| N      |     |   |   |        |        |        |
| HETATM | 751 | N | 0 | 4.767  | 4.608  | 0.746  |
| N      |     |   |   |        |        |        |

|        |     |   |   |        |        |        |
|--------|-----|---|---|--------|--------|--------|
| HETATM | 752 | N | 0 | 7.978  | 4.105  | -1.405 |
| N      |     |   |   |        |        |        |
| HETATM | 753 | C | 0 | 6.971  | 0.581  | -2.078 |
| C      |     |   |   |        |        |        |
| HETATM | 754 | H | 0 | 7.899  | 0.404  | -1.979 |
| H      |     |   |   |        |        |        |
| HETATM | 755 | C | 0 | 8.186  | 4.660  | -2.401 |
| C      |     |   |   |        |        |        |
| HETATM | 756 | C | 0 | 6.244  | -0.190 | -2.968 |
| C      |     |   |   |        |        |        |
| HETATM | 757 | H | 0 | 6.670  | -0.881 | -3.461 |
| H      |     |   |   |        |        |        |
| HETATM | 758 | C | 0 | 4.909  | 0.048  | -3.128 |
| C      |     |   |   |        |        |        |
| HETATM | 759 | H | 0 | 4.394  | -0.480 | -3.726 |
| H      |     |   |   |        |        |        |
| HETATM | 760 | C | 0 | 4.318  | 1.072  | -2.405 |
| C      |     |   |   |        |        |        |
| HETATM | 761 | H | 0 | 3.392  | 1.264  | -2.504 |
| H      |     |   |   |        |        |        |
| HETATM | 762 | C | 0 | 5.108  | 1.812  | -1.533 |
| C      |     |   |   |        |        |        |
| HETATM | 763 | C | 0 | 4.607  | 2.918  | -0.727 |
| C      |     |   |   |        |        |        |
| HETATM | 764 | C | 0 | 3.489  | 4.681  | 0.438  |
| C      |     |   |   |        |        |        |
| HETATM | 765 | C | 0 | 2.552  | 5.646  | 1.031  |
| C      |     |   |   |        |        |        |
| HETATM | 766 | C | 0 | 3.028  | 6.700  | 1.834  |
| C      |     |   |   |        |        |        |
| HETATM | 767 | H | 0 | 3.961  | 6.797  | 1.979  |
| H      |     |   |   |        |        |        |
| HETATM | 768 | C | 0 | 2.162  | 7.574  | 2.399  |
| C      |     |   |   |        |        |        |
| HETATM | 769 | H | 0 | 2.502  | 8.297  | 2.914  |
| H      |     |   |   |        |        |        |
| HETATM | 770 | C | 0 | 0.743  | 7.429  | 2.241  |
| C      |     |   |   |        |        |        |
| HETATM | 771 | C | 0 | -0.170 | 8.295  | 2.842  |
| C      |     |   |   |        |        |        |
| HETATM | 772 | H | 0 | 0.147  | 9.007  | 3.387  |
| H      |     |   |   |        |        |        |
| HETATM | 773 | C | 0 | -1.524 | 8.129  | 2.653  |
| C      |     |   |   |        |        |        |
| HETATM | 774 | H | 0 | -2.135 | 8.738  | 3.053  |
| H      |     |   |   |        |        |        |
| HETATM | 775 | C | 0 | -1.998 | 7.078  | 1.884  |
| C      |     |   |   |        |        |        |
| HETATM | 776 | H | 0 | -2.934 | 6.962  | 1.773  |
| H      |     |   |   |        |        |        |
| HETATM | 777 | C | 0 | -1.130 | 6.202  | 1.278  |
| C      |     |   |   |        |        |        |
| HETATM | 778 | H | 0 | -1.465 | 5.485  | 0.752  |
| H      |     |   |   |        |        |        |
| HETATM | 779 | C | 0 | 0.281  | 6.371  | 1.442  |
| C      |     |   |   |        |        |        |



|        |     |    |   |        |         |        |
|--------|-----|----|---|--------|---------|--------|
| HETATM | 780 | C  | 0 | 1.193  | 5.498   | 0.836  |
| C      |     |    |   |        |         |        |
| HETATM | 781 | H  | 0 | 0.873  | 4.793   | 0.285  |
| H      |     |    |   |        |         |        |
| HETATM | 782 | Zn | 0 | 11.671 | -8.521  | 0.612  |
| Zn     |     |    |   |        |         |        |
| HETATM | 783 | S  | 0 | 16.130 | -9.219  | 1.474  |
| S      |     |    |   |        |         |        |
| HETATM | 784 | S  | 0 | 10.607 | -11.160 | 4.540  |
| S      |     |    |   |        |         |        |
| HETATM | 785 | N  | 0 | 12.688 | -7.275  | 2.113  |
| N      |     |    |   |        |         |        |
| HETATM | 786 | N  | 0 | 13.724 | -9.312  | 0.675  |
| N      |     |    |   |        |         |        |
| HETATM | 787 | N  | 0 | 14.351 | -10.329 | 0.005  |
| N      |     |    |   |        |         |        |
| HETATM | 788 | N  | 0 | 11.141 | -9.825  | 2.156  |
| N      |     |    |   |        |         |        |
| HETATM | 789 | C  | 0 | 12.148 | -6.301  | 2.830  |
| C      |     |    |   |        |         |        |
| HETATM | 790 | H  | 0 | 11.219 | -6.125  | 2.731  |
| H      |     |    |   |        |         |        |
| HETATM | 791 | C  | 0 | 10.933 | -10.380 | 3.152  |
| C      |     |    |   |        |         |        |
| HETATM | 792 | C  | 0 | 12.875 | -5.531  | 3.719  |
| C      |     |    |   |        |         |        |
| HETATM | 793 | H  | 0 | 12.449 | -4.841  | 4.213  |
| H      |     |    |   |        |         |        |
| HETATM | 794 | C  | 0 | 14.209 | -5.769  | 3.879  |
| C      |     |    |   |        |         |        |
| HETATM | 795 | H  | 0 | 14.724 | -5.241  | 4.478  |
| H      |     |    |   |        |         |        |
| HETATM | 796 | C  | 0 | 14.800 | -6.793  | 3.156  |
| C      |     |    |   |        |         |        |
| HETATM | 797 | H  | 0 | 15.726 | -6.985  | 3.255  |
| H      |     |    |   |        |         |        |
| HETATM | 798 | C  | 0 | 14.009 | -7.533  | 2.284  |
| C      |     |    |   |        |         |        |
| HETATM | 799 | C  | 0 | 14.511 | -8.639  | 1.479  |
| C      |     |    |   |        |         |        |
| HETATM | 800 | C  | 0 | 15.630 | -10.402 | 0.313  |
| C      |     |    |   |        |         |        |
| HETATM | 801 | C  | 0 | 16.566 | -11.368 | -0.279 |
| C      |     |    |   |        |         |        |
| HETATM | 802 | C  | 0 | 16.090 | -12.421 | -1.083 |
| C      |     |    |   |        |         |        |
| HETATM | 803 | H  | 0 | 15.156 | -12.518 | -1.228 |
| H      |     |    |   |        |         |        |
| HETATM | 804 | C  | 0 | 16.956 | -13.295 | -1.649 |
| C      |     |    |   |        |         |        |
| HETATM | 805 | H  | 0 | 16.616 | -14.018 | -2.162 |
| H      |     |    |   |        |         |        |
| HETATM | 806 | C  | 0 | 18.376 | -13.150 | -1.489 |
| C      |     |    |   |        |         |        |
| HETATM | 807 | C  | 0 | 19.288 | -14.016 | -2.091 |
| C      |     |    |   |        |         |        |

|        |     |   |   |        |         |        |
|--------|-----|---|---|--------|---------|--------|
| HETATM | 808 | H | 0 | 18.972 | -14.727 | -2.635 |
| H      |     |   |   |        |         |        |
| HETATM | 809 | C | 0 | 20.643 | -13.851 | -1.902 |
| C      |     |   |   |        |         |        |
| HETATM | 810 | H | 0 | 21.254 | -14.458 | -2.301 |
| H      |     |   |   |        |         |        |
| HETATM | 811 | C | 0 | 21.117 | -12.799 | -1.133 |
| C      |     |   |   |        |         |        |
| HETATM | 812 | H | 0 | 22.053 | -12.683 | -1.022 |
| H      |     |   |   |        |         |        |
| HETATM | 813 | C | 0 | 20.248 | -11.923 | -0.527 |
| C      |     |   |   |        |         |        |
| HETATM | 814 | H | 0 | 20.583 | -11.206 | -0.000 |
| H      |     |   |   |        |         |        |
| HETATM | 815 | C | 0 | 18.838 | -12.092 | -0.691 |
| C      |     |   |   |        |         |        |
| HETATM | 816 | C | 0 | 17.926 | -11.218 | -0.085 |
| C      |     |   |   |        |         |        |
| HETATM | 817 | H | 0 | 18.244 | -10.514 | 0.467  |
| H      |     |   |   |        |         |        |
| HETATM | 818 | S | 0 | 7.213  | -7.822  | -0.251 |
| S      |     |   |   |        |         |        |
| HETATM | 819 | S | 0 | 12.736 | -5.882  | -3.316 |
| S      |     |   |   |        |         |        |
| HETATM | 820 | N | 0 | 10.655 | -9.767  | -0.888 |
| N      |     |   |   |        |         |        |
| HETATM | 821 | N | 0 | 9.618  | -7.730  | 0.548  |
| N      |     |   |   |        |         |        |
| HETATM | 822 | N | 0 | 8.991  | -6.712  | 1.218  |
| N      |     |   |   |        |         |        |
| HETATM | 823 | N | 0 | 12.201 | -7.216  | -0.933 |
| N      |     |   |   |        |         |        |
| HETATM | 824 | C | 0 | 11.195 | -10.740 | -1.607 |
| C      |     |   |   |        |         |        |
| HETATM | 825 | H | 0 | 12.123 | -10.916 | -1.507 |
| H      |     |   |   |        |         |        |
| HETATM | 826 | C | 0 | 12.410 | -6.661  | -1.929 |
| C      |     |   |   |        |         |        |
| HETATM | 827 | C | 0 | 10.469 | -11.510 | -2.495 |
| C      |     |   |   |        |         |        |
| HETATM | 828 | H | 0 | 10.894 | -12.202 | -2.990 |
| H      |     |   |   |        |         |        |
| HETATM | 829 | C | 0 | 9.134  | -11.272 | -2.656 |
| C      |     |   |   |        |         |        |
| HETATM | 830 | H | 0 | 8.618  | -11.800 | -3.255 |
| H      |     |   |   |        |         |        |
| HETATM | 831 | C | 0 | 8.542  | -10.249 | -1.933 |
| C      |     |   |   |        |         |        |
| HETATM | 832 | H | 0 | 7.616  | -10.056 | -2.031 |
| H      |     |   |   |        |         |        |
| HETATM | 833 | C | 0 | 9.333  | -9.508  | -1.060 |
| C      |     |   |   |        |         |        |
| HETATM | 834 | C | 0 | 8.832  | -8.402  | -0.256 |
| C      |     |   |   |        |         |        |
| HETATM | 835 | C | 0 | 7.712  | -6.639  | 0.910  |
| C      |     |   |   |        |         |        |

|        |     |    |   |        |        |        |
|--------|-----|----|---|--------|--------|--------|
| HETATM | 836 | C  | 0 | 6.776  | -5.674 | 1.502  |
| C      |     |    |   |        |        |        |
| HETATM | 837 | C  | 0 | 7.252  | -4.621 | 2.306  |
| C      |     |    |   |        |        |        |
| HETATM | 838 | H  | 0 | 8.186  | -4.523 | 2.452  |
| H      |     |    |   |        |        |        |
| HETATM | 839 | C  | 0 | 6.387  | -3.747 | 2.872  |
| C      |     |    |   |        |        |        |
| HETATM | 840 | H  | 0 | 6.726  | -3.023 | 3.385  |
| H      |     |    |   |        |        |        |
| HETATM | 841 | C  | 0 | 4.968  | -3.892 | 2.712  |
| C      |     |    |   |        |        |        |
| HETATM | 842 | C  | 0 | 4.055  | -3.025 | 3.314  |
| C      |     |    |   |        |        |        |
| HETATM | 843 | H  | 0 | 4.370  | -2.314 | 3.860  |
| H      |     |    |   |        |        |        |
| HETATM | 844 | C  | 0 | 2.700  | -3.192 | 3.126  |
| C      |     |    |   |        |        |        |
| HETATM | 845 | H  | 0 | 2.089  | -2.583 | 3.525  |
| H      |     |    |   |        |        |        |
| HETATM | 846 | C  | 0 | 2.226  | -4.242 | 2.356  |
| C      |     |    |   |        |        |        |
| HETATM | 847 | H  | 0 | 1.289  | -4.358 | 2.246  |
| H      |     |    |   |        |        |        |
| HETATM | 848 | C  | 0 | 3.094  | -5.119 | 1.750  |
| C      |     |    |   |        |        |        |
| HETATM | 849 | H  | 0 | 2.759  | -5.835 | 1.223  |
| H      |     |    |   |        |        |        |
| HETATM | 850 | C  | 0 | 4.504  | -4.949 | 1.914  |
| C      |     |    |   |        |        |        |
| HETATM | 851 | C  | 0 | 5.418  | -5.823 | 1.309  |
| C      |     |    |   |        |        |        |
| HETATM | 852 | H  | 0 | 5.098  | -6.528 | 0.757  |
| H      |     |    |   |        |        |        |
| HETATM | 853 | Zn | 0 | 10.670 | 16.920 | -0.192 |
| Zn     |     |    |   |        |        |        |
| HETATM | 854 | S  | 0 | 15.128 | 16.222 | 0.670  |
| S      |     |    |   |        |        |        |
| HETATM | 855 | S  | 0 | 9.605  | 14.281 | 3.736  |
| S      |     |    |   |        |        |        |
| HETATM | 856 | N  | 0 | 11.686 | 18.166 | 1.308  |
| N      |     |    |   |        |        |        |
| HETATM | 857 | N  | 0 | 12.723 | 16.128 | -0.129 |
| N      |     |    |   |        |        |        |
| HETATM | 858 | N  | 0 | 13.350 | 15.111 | -0.799 |
| N      |     |    |   |        |        |        |
| HETATM | 859 | N  | 0 | 10.140 | 15.616 | 1.352  |
| N      |     |    |   |        |        |        |
| HETATM | 860 | C  | 0 | 11.147 | 19.140 | 2.026  |
| C      |     |    |   |        |        |        |
| HETATM | 861 | H  | 0 | 10.218 | 19.316 | 1.927  |
| H      |     |    |   |        |        |        |
| HETATM | 862 | C  | 0 | 9.931  | 15.060 | 2.347  |
| C      |     |    |   |        |        |        |
| HETATM | 863 | C  | 0 | 11.873 | 19.910 | 2.915  |
| C      |     |    |   |        |        |        |

|        |     |   |   |        |        |        |
|--------|-----|---|---|--------|--------|--------|
| HETATM | 864 | H | 0 | 11.448 | 20.600 | 3.409  |
| H      |     |   |   |        |        |        |
| HETATM | 865 | C | 0 | 13.207 | 19.672 | 3.075  |
| C      |     |   |   |        |        |        |
| HETATM | 866 | H | 0 | 13.723 | 20.200 | 3.673  |
| H      |     |   |   |        |        |        |
| HETATM | 867 | C | 0 | 13.799 | 18.647 | 2.352  |
| C      |     |   |   |        |        |        |
| HETATM | 868 | H | 0 | 14.725 | 18.456 | 2.451  |
| H      |     |   |   |        |        |        |
| HETATM | 869 | C | 0 | 13.008 | 17.906 | 1.480  |
| C      |     |   |   |        |        |        |
| HETATM | 870 | C | 0 | 13.509 | 16.802 | 0.674  |
| C      |     |   |   |        |        |        |
| HETATM | 871 | C | 0 | 14.629 | 15.039 | -0.491 |
| C      |     |   |   |        |        |        |
| HETATM | 872 | C | 0 | 15.565 | 14.073 | -1.084 |
| C      |     |   |   |        |        |        |
| HETATM | 873 | C | 0 | 15.089 | 13.020 | -1.887 |
| C      |     |   |   |        |        |        |
| HETATM | 874 | H | 0 | 14.155 | 12.923 | -2.032 |
| H      |     |   |   |        |        |        |
| HETATM | 875 | C | 0 | 15.955 | 12.146 | -2.453 |
| C      |     |   |   |        |        |        |
| HETATM | 876 | H | 0 | 15.615 | 11.422 | -2.966 |
| H      |     |   |   |        |        |        |
| HETATM | 877 | C | 0 | 17.374 | 12.291 | -2.294 |
| C      |     |   |   |        |        |        |
| HETATM | 878 | C | 0 | 18.286 | 11.424 | -2.895 |
| C      |     |   |   |        |        |        |
| HETATM | 879 | H | 0 | 17.971 | 10.713 | -3.440 |
| H      |     |   |   |        |        |        |
| HETATM | 880 | C | 0 | 19.641 | 11.590 | -2.707 |
| C      |     |   |   |        |        |        |
| HETATM | 881 | H | 0 | 20.252 | 10.982 | -3.106 |
| H      |     |   |   |        |        |        |
| HETATM | 882 | C | 0 | 20.115 | 12.642 | -1.937 |
| C      |     |   |   |        |        |        |
| HETATM | 883 | H | 0 | 21.052 | 12.758 | -1.826 |
| H      |     |   |   |        |        |        |
| HETATM | 884 | C | 0 | 19.247 | 13.518 | -1.331 |
| C      |     |   |   |        |        |        |
| HETATM | 885 | H | 0 | 19.582 | 14.235 | -0.805 |
| H      |     |   |   |        |        |        |
| HETATM | 886 | C | 0 | 17.837 | 13.348 | -1.495 |
| C      |     |   |   |        |        |        |
| HETATM | 887 | C | 0 | 16.924 | 14.223 | -0.889 |
| C      |     |   |   |        |        |        |
| HETATM | 888 | H | 0 | 17.243 | 14.926 | -0.338 |
| H      |     |   |   |        |        |        |
| HETATM | 889 | S | 0 | 6.212  | 17.618 | -1.055 |
| S      |     |   |   |        |        |        |
| HETATM | 890 | S | 0 | 11.734 | 19.559 | -4.121 |
| S      |     |   |   |        |        |        |
| HETATM | 891 | N | 0 | 9.654  | 15.674 | -1.693 |
| N      |     |   |   |        |        |        |

|        |     |   |   |        |        |        |
|--------|-----|---|---|--------|--------|--------|
| HETATM | 892 | N | 0 | 8.617  | 17.711 | -0.257 |
| N      |     |   |   |        |        |        |
| HETATM | 893 | N | 0 | 7.990  | 18.729 | 0.414  |
| N      |     |   |   |        |        |        |
| HETATM | 894 | N | 0 | 11.200 | 18.224 | -1.738 |
| N      |     |   |   |        |        |        |
| HETATM | 895 | C | 0 | 10.194 | 14.700 | -2.411 |
| C      |     |   |   |        |        |        |
| HETATM | 896 | H | 0 | 11.122 | 14.525 | -2.311 |
| H      |     |   |   |        |        |        |
| HETATM | 897 | C | 0 | 11.408 | 18.780 | -2.733 |
| C      |     |   |   |        |        |        |
| HETATM | 898 | C | 0 | 9.466  | 13.930 | -3.299 |
| C      |     |   |   |        |        |        |
| HETATM | 899 | H | 0 | 9.892  | 13.239 | -3.794 |
| H      |     |   |   |        |        |        |
| HETATM | 900 | C | 0 | 8.133  | 14.169 | -3.460 |
| C      |     |   |   |        |        |        |
| HETATM | 901 | H | 0 | 7.617  | 13.640 | -4.059 |
| H      |     |   |   |        |        |        |
| HETATM | 902 | C | 0 | 7.541  | 15.192 | -2.737 |
| C      |     |   |   |        |        |        |
| HETATM | 903 | H | 0 | 6.615  | 15.384 | -2.835 |
| H      |     |   |   |        |        |        |
| HETATM | 904 | C | 0 | 8.332  | 15.933 | -1.865 |
| C      |     |   |   |        |        |        |
| HETATM | 905 | C | 0 | 7.831  | 17.038 | -1.060 |
| C      |     |   |   |        |        |        |
| HETATM | 906 | C | 0 | 6.711  | 18.801 | 0.106  |
| C      |     |   |   |        |        |        |
| HETATM | 907 | C | 0 | 5.775  | 19.766 | 0.698  |
| C      |     |   |   |        |        |        |
| HETATM | 908 | C | 0 | 6.251  | 20.819 | 1.502  |
| C      |     |   |   |        |        |        |
| HETATM | 909 | H | 0 | 7.185  | 20.916 | 1.648  |
| H      |     |   |   |        |        |        |
| HETATM | 910 | C | 0 | 5.385  | 21.693 | 2.068  |
| C      |     |   |   |        |        |        |
| HETATM | 911 | H | 0 | 5.725  | 22.417 | 2.581  |
| H      |     |   |   |        |        |        |
| HETATM | 912 | C | 0 | 3.966  | 21.549 | 1.908  |
| C      |     |   |   |        |        |        |
| HETATM | 913 | C | 0 | 3.054  | 22.416 | 2.509  |
| C      |     |   |   |        |        |        |
| HETATM | 914 | H | 0 | 3.369  | 23.127 | 3.055  |
| H      |     |   |   |        |        |        |
| HETATM | 915 | C | 0 | 1.699  | 22.249 | 2.321  |
| C      |     |   |   |        |        |        |
| HETATM | 916 | H | 0 | 1.087  | 22.858 | 2.720  |
| H      |     |   |   |        |        |        |
| HETATM | 917 | C | 0 | 1.225  | 21.198 | 1.552  |
| C      |     |   |   |        |        |        |
| HETATM | 918 | H | 0 | 0.288  | 21.082 | 1.441  |
| H      |     |   |   |        |        |        |
| HETATM | 919 | C | 0 | 2.093  | 20.322 | 0.945  |
| C      |     |   |   |        |        |        |

|        |     |    |   |        |        |        |
|--------|-----|----|---|--------|--------|--------|
| HETATM | 920 | H  | 0 | 1.758  | 19.606 | 0.419  |
| H      |     |    |   |        |        |        |
| HETATM | 921 | C  | 0 | 3.503  | 20.491 | 1.110  |
| C      |     |    |   |        |        |        |
| HETATM | 922 | C  | 0 | 4.416  | 19.618 | 0.504  |
| C      |     |    |   |        |        |        |
| HETATM | 923 | H  | 0 | 4.097  | 18.913 | -0.048 |
| H      |     |    |   |        |        |        |
| HETATM | 924 | Zn | 0 | 14.894 | 5.600  | 0.279  |
| Zn     |     |    |   |        |        |        |
| HETATM | 925 | S  | 0 | 19.353 | 4.901  | 1.142  |
| S      |     |    |   |        |        |        |
| HETATM | 926 | S  | 0 | 13.829 | 2.960  | 4.208  |
| S      |     |    |   |        |        |        |
| HETATM | 927 | N  | 0 | 15.911 | 6.845  | 1.780  |
| N      |     |    |   |        |        |        |
| HETATM | 928 | N  | 0 | 16.948 | 4.808  | 0.343  |
| N      |     |    |   |        |        |        |
| HETATM | 929 | N  | 0 | 17.574 | 3.791  | -0.327 |
| N      |     |    |   |        |        |        |
| HETATM | 930 | N  | 0 | 14.364 | 4.295  | 1.825  |
| N      |     |    |   |        |        |        |
| HETATM | 931 | C  | 0 | 15.370 | 7.819  | 2.498  |
| C      |     |    |   |        |        |        |
| HETATM | 932 | H  | 0 | 14.442 | 7.995  | 2.398  |
| H      |     |    |   |        |        |        |
| HETATM | 933 | C  | 0 | 14.155 | 3.740  | 2.820  |
| C      |     |    |   |        |        |        |
| HETATM | 934 | C  | 0 | 16.097 | 8.589  | 3.386  |
| C      |     |    |   |        |        |        |
| HETATM | 935 | H  | 0 | 15.672 | 9.280  | 3.881  |
| H      |     |    |   |        |        |        |
| HETATM | 936 | C  | 0 | 17.432 | 8.351  | 3.547  |
| C      |     |    |   |        |        |        |
| HETATM | 937 | H  | 0 | 17.947 | 8.879  | 4.146  |
| H      |     |    |   |        |        |        |
| HETATM | 938 | C  | 0 | 18.024 | 7.327  | 2.824  |
| C      |     |    |   |        |        |        |
| HETATM | 939 | H  | 0 | 18.949 | 7.135  | 2.922  |
| H      |     |    |   |        |        |        |
| HETATM | 940 | C  | 0 | 17.233 | 6.586  | 1.952  |
| C      |     |    |   |        |        |        |
| HETATM | 941 | C  | 0 | 17.734 | 5.481  | 1.147  |
| C      |     |    |   |        |        |        |
| HETATM | 942 | C  | 0 | 18.853 | 3.718  | -0.019 |
| C      |     |    |   |        |        |        |
| HETATM | 943 | C  | 0 | 19.790 | 2.753  | -0.611 |
| C      |     |    |   |        |        |        |
| HETATM | 944 | C  | 0 | 19.313 | 1.699  | -1.415 |
| C      |     |    |   |        |        |        |
| HETATM | 945 | H  | 0 | 18.380 | 1.603  | -1.560 |
| H      |     |    |   |        |        |        |
| HETATM | 946 | C  | 0 | 20.179 | 0.826  | -1.981 |
| C      |     |    |   |        |        |        |
| HETATM | 947 | H  | 0 | 19.839 | 0.102  | -2.494 |
| H      |     |    |   |        |        |        |

|        |     |   |   |        |        |        |
|--------|-----|---|---|--------|--------|--------|
| HETATM | 948 | C | 0 | 21.598 | 0.970  | -1.821 |
| C      |     |   |   |        |        |        |
| HETATM | 949 | C | 0 | 22.511 | 0.104  | -2.422 |
| C      |     |   |   |        |        |        |
| HETATM | 950 | H | 0 | 22.194 | -0.607 | -2.968 |
| H      |     |   |   |        |        |        |
| HETATM | 951 | C | 0 | 23.865 | 0.269  | -2.234 |
| C      |     |   |   |        |        |        |
| HETATM | 952 | H | 0 | 24.477 | -0.338 | -2.633 |
| H      |     |   |   |        |        |        |
| HETATM | 953 | C | 0 | 24.340 | 1.321  | -1.464 |
| C      |     |   |   |        |        |        |
| HETATM | 954 | H | 0 | 25.275 | 1.437  | -1.354 |
| H      |     |   |   |        |        |        |
| HETATM | 955 | C | 0 | 23.471 | 2.198  | -0.858 |
| C      |     |   |   |        |        |        |
| HETATM | 956 | H | 0 | 23.806 | 2.914  | -0.332 |
| H      |     |   |   |        |        |        |
| HETATM | 957 | C | 0 | 22.061 | 2.028  | -1.023 |
| C      |     |   |   |        |        |        |
| HETATM | 958 | C | 0 | 21.148 | 2.902  | -0.417 |
| C      |     |   |   |        |        |        |
| HETATM | 959 | H | 0 | 21.468 | 3.606  | 0.135  |
| H      |     |   |   |        |        |        |
| HETATM | 960 | S | 0 | 10.436 | 6.298  | -0.583 |
| S      |     |   |   |        |        |        |
| HETATM | 961 | S | 0 | 15.959 | 8.239  | -3.649 |
| S      |     |   |   |        |        |        |
| HETATM | 962 | N | 0 | 13.878 | 4.353  | -1.221 |
| N      |     |   |   |        |        |        |
| HETATM | 963 | N | 0 | 12.841 | 6.390  | 0.216  |
| N      |     |   |   |        |        |        |
| HETATM | 964 | N | 0 | 12.214 | 7.408  | 0.886  |
| N      |     |   |   |        |        |        |
| HETATM | 965 | N | 0 | 15.425 | 6.904  | -1.265 |
| N      |     |   |   |        |        |        |
| HETATM | 966 | C | 0 | 14.418 | 3.380  | -1.939 |
| C      |     |   |   |        |        |        |
| HETATM | 967 | H | 0 | 15.346 | 3.204  | -1.840 |
| H      |     |   |   |        |        |        |
| HETATM | 968 | C | 0 | 15.633 | 7.459  | -2.262 |
| C      |     |   |   |        |        |        |
| HETATM | 969 | C | 0 | 13.691 | 2.610  | -2.828 |
| C      |     |   |   |        |        |        |
| HETATM | 970 | H | 0 | 14.117 | 1.919  | -3.322 |
| H      |     |   |   |        |        |        |
| HETATM | 971 | C | 0 | 12.356 | 2.848  | -2.989 |
| C      |     |   |   |        |        |        |
| HETATM | 972 | H | 0 | 11.841 | 2.320  | -3.586 |
| H      |     |   |   |        |        |        |
| HETATM | 973 | C | 0 | 11.765 | 3.871  | -2.265 |
| C      |     |   |   |        |        |        |
| HETATM | 974 | H | 0 | 10.839 | 4.064  | -2.364 |
| H      |     |   |   |        |        |        |
| HETATM | 975 | C | 0 | 12.555 | 4.612  | -1.393 |
| C      |     |   |   |        |        |        |

|        |      |    |   |        |        |        |
|--------|------|----|---|--------|--------|--------|
| HETATM | 976  | C  | 0 | 12.054 | 5.718  | -0.587 |
| C      |      |    |   |        |        |        |
| HETATM | 977  | C  | 0 | 10.935 | 7.481  | 0.578  |
| C      |      |    |   |        |        |        |
| HETATM | 978  | C  | 0 | 10.000 | 8.446  | 1.171  |
| C      |      |    |   |        |        |        |
| HETATM | 979  | C  | 0 | 10.475 | 9.500  | 1.974  |
| C      |      |    |   |        |        |        |
| HETATM | 980  | H  | 0 | 11.409 | 9.597  | 2.119  |
| H      |      |    |   |        |        |        |
| HETATM | 981  | C  | 0 | 9.609  | 10.373 | 2.539  |
| C      |      |    |   |        |        |        |
| HETATM | 982  | H  | 0 | 9.949  | 11.097 | 3.053  |
| H      |      |    |   |        |        |        |
| HETATM | 983  | C  | 0 | 8.190  | 10.228 | 2.381  |
| C      |      |    |   |        |        |        |
| HETATM | 984  | C  | 0 | 7.277  | 11.095 | 2.982  |
| C      |      |    |   |        |        |        |
| HETATM | 985  | H  | 0 | 7.594  | 11.806 | 3.527  |
| H      |      |    |   |        |        |        |
| HETATM | 986  | C  | 0 | 5.923  | 10.929 | 2.793  |
| C      |      |    |   |        |        |        |
| HETATM | 987  | H  | 0 | 5.312  | 11.537 | 3.193  |
| H      |      |    |   |        |        |        |
| HETATM | 988  | C  | 0 | 5.449  | 9.877  | 2.024  |
| C      |      |    |   |        |        |        |
| HETATM | 989  | H  | 0 | 4.513  | 9.762  | 1.913  |
| H      |      |    |   |        |        |        |
| HETATM | 990  | C  | 0 | 6.318  | 9.002  | 1.418  |
| C      |      |    |   |        |        |        |
| HETATM | 991  | H  | 0 | 5.982  | 8.285  | 0.892  |
| H      |      |    |   |        |        |        |
| HETATM | 992  | C  | 0 | 7.728  | 9.171  | 1.582  |
| C      |      |    |   |        |        |        |
| HETATM | 993  | C  | 0 | 8.640  | 8.297  | 0.976  |
| C      |      |    |   |        |        |        |
| HETATM | 994  | H  | 0 | 8.320  | 7.592  | 0.425  |
| H      |      |    |   |        |        |        |
| HETATM | 995  | Zn | 0 | 19.118 | -5.721 | 0.752  |
| Zn     |      |    |   |        |        |        |
| HETATM | 996  | S  | 0 | 23.576 | -6.419 | 1.614  |
| S      |      |    |   |        |        |        |
| HETATM | 997  | S  | 0 | 18.053 | -8.360 | 4.680  |
| S      |      |    |   |        |        |        |
| HETATM | 998  | N  | 0 | 20.135 | -4.475 | 2.252  |
| N      |      |    |   |        |        |        |
| HETATM | 999  | N  | 0 | 21.172 | -6.512 | 0.815  |
| N      |      |    |   |        |        |        |
| HETATM | 1000 | N  | 0 | 21.799 | -7.529 | 0.145  |
| N      |      |    |   |        |        |        |
| HETATM | 1001 | N  | 0 | 18.588 | -7.025 | 2.296  |
| N      |      |    |   |        |        |        |
| HETATM | 1002 | C  | 0 | 19.595 | -3.502 | 2.970  |
| C      |      |    |   |        |        |        |
| HETATM | 1003 | H  | 0 | 18.667 | -3.325 | 2.871  |
| H      |      |    |   |        |        |        |



|             |   |   |        |         |        |
|-------------|---|---|--------|---------|--------|
| HETATM 1004 | C | 0 | 18.379 | -7.581  | 3.292  |
| C           |   |   |        |         |        |
| HETATM 1005 | C | 0 | 20.322 | -2.731  | 3.859  |
| C           |   |   |        |         |        |
| HETATM 1006 | H | 0 | 19.896 | -2.041  | 4.353  |
| H           |   |   |        |         |        |
| HETATM 1007 | C | 0 | 21.656 | -2.969  | 4.019  |
| C           |   |   |        |         |        |
| HETATM 1008 | H | 0 | 22.171 | -2.442  | 4.617  |
| H           |   |   |        |         |        |
| HETATM 1009 | C | 0 | 22.248 | -3.993  | 3.296  |
| C           |   |   |        |         |        |
| HETATM 1010 | H | 0 | 23.173 | -4.185  | 3.395  |
| H           |   |   |        |         |        |
| HETATM 1011 | C | 0 | 21.457 | -4.733  | 2.424  |
| C           |   |   |        |         |        |
| HETATM 1012 | C | 0 | 21.959 | -5.839  | 1.618  |
| C           |   |   |        |         |        |
| HETATM 1013 | C | 0 | 23.077 | -7.602  | 0.453  |
| C           |   |   |        |         |        |
| HETATM 1014 | C | 0 | 24.014 | -8.568  | -0.140 |
| C           |   |   |        |         |        |
| HETATM 1015 | C | 0 | 23.537 | -9.621  | -0.943 |
| C           |   |   |        |         |        |
| HETATM 1016 | H | 0 | 22.603 | -9.718  | -1.088 |
| H           |   |   |        |         |        |
| HETATM 1017 | C | 0 | 24.403 | -10.495 | -1.509 |
| C           |   |   |        |         |        |
| HETATM 1018 | H | 0 | 24.063 | -11.218 | -2.022 |
| H           |   |   |        |         |        |
| HETATM 1019 | C | 0 | 25.823 | -10.350 | -1.350 |
| C           |   |   |        |         |        |
| HETATM 1020 | C | 0 | 26.735 | -11.216 | -1.951 |
| C           |   |   |        |         |        |
| HETATM 1021 | H | 0 | 26.419 | -11.928 | -2.496 |
| H           |   |   |        |         |        |
| HETATM 1022 | C | 0 | 28.090 | -11.051 | -1.763 |
| C           |   |   |        |         |        |
| HETATM 1023 | H | 0 | 28.701 | -11.659 | -2.162 |
| H           |   |   |        |         |        |
| HETATM 1024 | C | 0 | 28.564 | -10.000 | -0.993 |
| C           |   |   |        |         |        |
| HETATM 1025 | H | 0 | 29.500 | -9.884  | -0.883 |
| H           |   |   |        |         |        |
| HETATM 1026 | C | 0 | 27.695 | -9.123  | -0.387 |
| C           |   |   |        |         |        |
| HETATM 1027 | H | 0 | 28.031 | -8.406  | 0.139  |
| H           |   |   |        |         |        |
| HETATM 1028 | C | 0 | 26.285 | -9.293  | -0.551 |
| C           |   |   |        |         |        |
| HETATM 1029 | C | 0 | 25.372 | -8.419  | 0.054  |
| C           |   |   |        |         |        |
| HETATM 1030 | H | 0 | 25.692 | -7.714  | 0.606  |
| H           |   |   |        |         |        |
| HETATM 1031 | S | 0 | 14.660 | -5.023  | -0.111 |
| S           |   |   |        |         |        |

|             |   |   |        |        |        |
|-------------|---|---|--------|--------|--------|
| HETATM 1032 | S | 0 | 20.184 | -3.082 | -3.177 |
| S           |   |   |        |        |        |
| HETATM 1033 | N | 0 | 18.102 | -6.968 | -0.749 |
| N           |   |   |        |        |        |
| HETATM 1034 | N | 0 | 17.065 | -4.930 | 0.687  |
| N           |   |   |        |        |        |
| HETATM 1035 | N | 0 | 16.438 | -3.912 | 1.358  |
| N           |   |   |        |        |        |
| HETATM 1036 | N | 0 | 19.648 | -4.417 | -0.794 |
| N           |   |   |        |        |        |
| HETATM 1037 | C | 0 | 18.642 | -7.940 | -1.467 |
| C           |   |   |        |        |        |
| HETATM 1038 | H | 0 | 19.570 | -8.117 | -1.367 |
| H           |   |   |        |        |        |
| HETATM 1039 | C | 0 | 19.858 | -3.861 | -1.789 |
| C           |   |   |        |        |        |
| HETATM 1040 | C | 0 | 17.915 | -8.711 | -2.355 |
| C           |   |   |        |        |        |
| HETATM 1041 | H | 0 | 18.341 | -9.402 | -2.850 |
| H           |   |   |        |        |        |
| HETATM 1042 | C | 0 | 16.581 | -8.473 | -2.516 |
| C           |   |   |        |        |        |
| HETATM 1043 | H | 0 | 16.065 | -9.001 | -3.115 |
| H           |   |   |        |        |        |
| HETATM 1044 | C | 0 | 15.989 | -7.449 | -1.793 |
| C           |   |   |        |        |        |
| HETATM 1045 | H | 0 | 15.064 | -7.256 | -1.891 |
| H           |   |   |        |        |        |
| HETATM 1046 | C | 0 | 16.780 | -6.708 | -0.920 |
| C           |   |   |        |        |        |
| HETATM 1047 | C | 0 | 16.279 | -5.602 | -0.116 |
| C           |   |   |        |        |        |
| HETATM 1048 | C | 0 | 15.159 | -3.840 | 1.050  |
| C           |   |   |        |        |        |
| HETATM 1049 | C | 0 | 14.223 | -2.874 | 1.642  |
| C           |   |   |        |        |        |
| HETATM 1050 | C | 0 | 14.700 | -1.821 | 2.445  |
| C           |   |   |        |        |        |
| HETATM 1051 | H | 0 | 15.633 | -1.724 | 2.591  |
| H           |   |   |        |        |        |
| HETATM 1052 | C | 0 | 13.834 | -0.947 | 3.012  |
| C           |   |   |        |        |        |
| HETATM 1053 | H | 0 | 14.173 | -0.224 | 3.525  |
| H           |   |   |        |        |        |
| HETATM 1054 | C | 0 | 12.415 | -1.092 | 2.852  |
| C           |   |   |        |        |        |
| HETATM 1055 | C | 0 | 11.502 | -0.226 | 3.453  |
| C           |   |   |        |        |        |
| HETATM 1056 | H | 0 | 11.818 | 0.486  | 3.999  |
| H           |   |   |        |        |        |
| HETATM 1057 | C | 0 | 10.148 | -0.392 | 3.265  |
| C           |   |   |        |        |        |
| HETATM 1058 | H | 0 | 9.535  | 0.217  | 3.664  |
| H           |   |   |        |        |        |
| HETATM 1059 | C | 0 | 9.673  | -1.443 | 2.495  |
| C           |   |   |        |        |        |

|        |      |   |   |        |        |       |
|--------|------|---|---|--------|--------|-------|
| HETATM | 1060 | H | 0 | 8.737  | -1.558 | 2.385 |
| H      |      |   |   |        |        |       |
| HETATM | 1061 | C | 0 | 10.541 | -2.319 | 1.889 |
| C      |      |   |   |        |        |       |
| HETATM | 1062 | H | 0 | 10.206 | -3.035 | 1.363 |
| H      |      |   |   |        |        |       |
| HETATM | 1063 | C | 0 | 11.951 | -2.149 | 2.054 |
| C      |      |   |   |        |        |       |
| HETATM | 1064 | C | 0 | 12.865 | -3.023 | 1.448 |
| C      |      |   |   |        |        |       |
| HETATM | 1065 | H | 0 | 12.545 | -3.728 | 0.896 |
| H      |      |   |   |        |        |       |

END

|         |    |    |    |    |
|---------|----|----|----|----|
| CONNECT | 2  | 18 | 19 |    |
| CONNECT | 3  | 10 |    |    |
| CONNECT | 4  | 8  | 17 |    |
| CONNECT | 5  | 6  | 18 |    |
| CONNECT | 6  | 5  | 19 |    |
| CONNECT | 7  | 10 |    |    |
| CONNECT | 8  | 4  | 9  | 11 |
| CONNECT | 9  | 8  |    |    |
| CONNECT | 10 | 3  | 7  |    |
| CONNECT | 11 | 8  | 12 | 13 |
| CONNECT | 12 | 11 |    |    |
| CONNECT | 13 | 11 | 14 | 15 |
| CONNECT | 14 | 13 |    |    |
| CONNECT | 15 | 13 | 16 | 17 |
| CONNECT | 16 | 15 |    |    |
| CONNECT | 17 | 4  | 15 | 18 |
| CONNECT | 18 | 2  | 5  | 17 |
| CONNECT | 19 | 2  | 6  | 20 |
| CONNECT | 20 | 19 | 21 | 35 |
| CONNECT | 21 | 20 | 22 | 23 |
| CONNECT | 22 | 21 |    |    |
| CONNECT | 23 | 21 | 24 | 25 |
| CONNECT | 24 | 23 |    |    |
| CONNECT | 25 | 23 | 26 | 34 |
| CONNECT | 26 | 25 | 27 | 28 |
| CONNECT | 27 | 26 |    |    |
| CONNECT | 28 | 26 | 29 | 30 |
| CONNECT | 29 | 28 |    |    |
| CONNECT | 30 | 28 | 31 | 32 |
| CONNECT | 31 | 30 |    |    |
| CONNECT | 32 | 30 | 33 | 34 |
| CONNECT | 33 | 32 |    |    |
| CONNECT | 34 | 25 | 32 | 35 |
| CONNECT | 35 | 34 | 20 | 36 |
| CONNECT | 36 | 35 |    |    |
| CONNECT | 37 | 53 | 54 |    |
| CONNECT | 38 | 45 |    |    |
| CONNECT | 39 | 43 | 52 |    |
| CONNECT | 40 | 41 | 53 |    |
| CONNECT | 41 | 40 | 54 |    |
| CONNECT | 42 | 45 |    |    |
| CONNECT | 43 | 39 | 44 | 46 |
| CONNECT | 44 | 43 |    |    |
| CONNECT | 45 | 38 | 42 |    |

|        |     |     |     |     |
|--------|-----|-----|-----|-----|
| CONECT | 46  | 43  | 47  | 48  |
| CONECT | 47  | 46  |     |     |
| CONECT | 48  | 46  | 49  | 50  |
| CONECT | 49  | 48  |     |     |
| CONECT | 50  | 48  | 51  | 52  |
| CONECT | 51  | 50  |     |     |
| CONECT | 52  | 50  | 39  | 53  |
| CONECT | 53  | 52  | 37  | 40  |
| CONECT | 54  | 37  | 41  | 55  |
| CONECT | 55  | 54  | 56  | 70  |
| CONECT | 56  | 55  | 57  | 58  |
| CONECT | 57  | 56  |     |     |
| CONECT | 58  | 56  | 59  | 60  |
| CONECT | 59  | 58  |     |     |
| CONECT | 60  | 58  | 61  | 69  |
| CONECT | 61  | 60  | 62  | 63  |
| CONECT | 62  | 61  |     |     |
| CONECT | 63  | 61  | 64  | 65  |
| CONECT | 64  | 63  |     |     |
| CONECT | 65  | 63  | 66  | 67  |
| CONECT | 66  | 65  |     |     |
| CONECT | 67  | 65  | 68  | 69  |
| CONECT | 68  | 67  |     |     |
| CONECT | 69  | 67  | 60  | 70  |
| CONECT | 70  | 55  | 69  | 71  |
| CONECT | 71  | 70  |     |     |
| CONECT | 73  | 89  | 90  |     |
| CONECT | 74  | 81  |     |     |
| CONECT | 75  | 79  | 88  |     |
| CONECT | 76  | 77  | 89  |     |
| CONECT | 77  | 76  | 90  |     |
| CONECT | 78  | 81  |     |     |
| CONECT | 79  | 75  | 80  | 82  |
| CONECT | 80  | 79  |     |     |
| CONECT | 81  | 74  | 78  |     |
| CONECT | 82  | 79  | 83  | 84  |
| CONECT | 83  | 82  |     |     |
| CONECT | 84  | 82  | 85  | 86  |
| CONECT | 85  | 84  |     |     |
| CONECT | 86  | 84  | 87  | 88  |
| CONECT | 87  | 86  |     |     |
| CONECT | 88  | 75  | 86  | 89  |
| CONECT | 89  | 73  | 76  | 88  |
| CONECT | 90  | 73  | 77  | 91  |
| CONECT | 91  | 90  | 92  | 106 |
| CONECT | 92  | 91  | 93  | 94  |
| CONECT | 93  | 92  |     |     |
| CONECT | 94  | 92  | 95  | 96  |
| CONECT | 95  | 94  |     |     |
| CONECT | 96  | 94  | 97  | 105 |
| CONECT | 97  | 96  | 98  | 99  |
| CONECT | 98  | 97  |     |     |
| CONECT | 99  | 97  | 100 | 101 |
| CONECT | 100 | 99  |     |     |
| CONECT | 101 | 99  | 102 | 103 |
| CONECT | 102 | 101 |     |     |
| CONECT | 103 | 101 | 104 | 105 |

|        |     |     |     |     |
|--------|-----|-----|-----|-----|
| CONECT | 104 | 103 |     |     |
| CONECT | 105 | 96  | 103 | 106 |
| CONECT | 106 | 91  | 105 | 107 |
| CONECT | 107 | 106 |     |     |
| CONECT | 108 | 124 | 125 |     |
| CONECT | 109 | 116 |     |     |
| CONECT | 110 | 114 | 123 |     |
| CONECT | 111 | 112 | 124 |     |
| CONECT | 112 | 111 | 125 |     |
| CONECT | 113 | 116 |     |     |
| CONECT | 114 | 110 | 115 | 117 |
| CONECT | 115 | 114 |     |     |
| CONECT | 116 | 109 | 113 |     |
| CONECT | 117 | 114 | 118 | 119 |
| CONECT | 118 | 117 |     |     |
| CONECT | 119 | 117 | 120 | 121 |
| CONECT | 120 | 119 |     |     |
| CONECT | 121 | 119 | 122 | 123 |
| CONECT | 122 | 121 |     |     |
| CONECT | 123 | 110 | 121 | 124 |
| CONECT | 124 | 123 | 108 | 111 |
| CONECT | 125 | 108 | 112 | 126 |
| CONECT | 126 | 125 | 127 | 141 |
| CONECT | 127 | 126 | 128 | 129 |
| CONECT | 128 | 127 |     |     |
| CONECT | 129 | 127 | 130 | 131 |
| CONECT | 130 | 129 |     |     |
| CONECT | 131 | 129 | 132 | 140 |
| CONECT | 132 | 131 | 133 | 134 |
| CONECT | 133 | 132 |     |     |
| CONECT | 134 | 132 | 135 | 136 |
| CONECT | 135 | 134 |     |     |
| CONECT | 136 | 134 | 137 | 138 |
| CONECT | 137 | 136 |     |     |
| CONECT | 138 | 136 | 139 | 140 |
| CONECT | 139 | 138 |     |     |
| CONECT | 140 | 138 | 131 | 141 |
| CONECT | 141 | 140 | 126 | 142 |
| CONECT | 142 | 141 |     |     |
| CONECT | 144 | 160 | 161 |     |
| CONECT | 145 | 152 |     |     |
| CONECT | 146 | 150 | 159 |     |
| CONECT | 147 | 148 | 160 |     |
| CONECT | 148 | 147 | 161 |     |
| CONECT | 149 | 152 |     |     |
| CONECT | 150 | 146 | 151 | 153 |
| CONECT | 151 | 150 |     |     |
| CONECT | 152 | 145 | 149 |     |
| CONECT | 153 | 150 | 154 | 155 |
| CONECT | 154 | 153 |     |     |
| CONECT | 155 | 153 | 156 | 157 |
| CONECT | 156 | 155 |     |     |
| CONECT | 157 | 155 | 158 | 159 |
| CONECT | 158 | 157 |     |     |
| CONECT | 159 | 146 | 157 | 160 |
| CONECT | 160 | 147 | 144 | 159 |
| CONECT | 161 | 144 | 148 | 162 |

|        |     |     |     |     |
|--------|-----|-----|-----|-----|
| CONECT | 162 | 161 | 163 | 177 |
| CONECT | 163 | 162 | 164 | 165 |
| CONECT | 164 | 163 |     |     |
| CONECT | 165 | 163 | 166 | 167 |
| CONECT | 166 | 165 |     |     |
| CONECT | 167 | 165 | 168 | 176 |
| CONECT | 168 | 167 | 169 | 170 |
| CONECT | 169 | 168 |     |     |
| CONECT | 170 | 168 | 171 | 172 |
| CONECT | 171 | 170 |     |     |
| CONECT | 172 | 170 | 173 | 174 |
| CONECT | 173 | 172 |     |     |
| CONECT | 174 | 172 | 175 | 176 |
| CONECT | 175 | 174 |     |     |
| CONECT | 176 | 167 | 174 | 177 |
| CONECT | 177 | 176 | 162 | 178 |
| CONECT | 178 | 177 |     |     |
| CONECT | 179 | 195 | 196 |     |
| CONECT | 180 | 187 |     |     |
| CONECT | 181 | 185 | 194 |     |
| CONECT | 182 | 183 | 195 |     |
| CONECT | 183 | 182 | 196 |     |
| CONECT | 184 | 187 |     |     |
| CONECT | 185 | 181 | 186 | 188 |
| CONECT | 186 | 185 |     |     |
| CONECT | 187 | 180 | 184 |     |
| CONECT | 188 | 185 | 189 | 190 |
| CONECT | 189 | 188 |     |     |
| CONECT | 190 | 188 | 191 | 192 |
| CONECT | 191 | 190 |     |     |
| CONECT | 192 | 190 | 193 | 194 |
| CONECT | 193 | 192 |     |     |
| CONECT | 194 | 192 | 181 | 195 |
| CONECT | 195 | 179 | 182 | 194 |
| CONECT | 196 | 179 | 183 | 197 |
| CONECT | 197 | 196 | 198 | 212 |
| CONECT | 198 | 197 | 199 | 200 |
| CONECT | 199 | 198 |     |     |
| CONECT | 200 | 198 | 201 | 202 |
| CONECT | 201 | 200 |     |     |
| CONECT | 202 | 200 | 203 | 211 |
| CONECT | 203 | 202 | 204 | 205 |
| CONECT | 204 | 203 |     |     |
| CONECT | 205 | 203 | 206 | 207 |
| CONECT | 206 | 205 |     |     |
| CONECT | 207 | 205 | 208 | 209 |
| CONECT | 208 | 207 |     |     |
| CONECT | 209 | 207 | 210 | 211 |
| CONECT | 210 | 209 |     |     |
| CONECT | 211 | 202 | 209 | 212 |
| CONECT | 212 | 197 | 211 | 213 |
| CONECT | 213 | 212 |     |     |
| CONECT | 215 | 231 | 232 |     |
| CONECT | 216 | 223 |     |     |
| CONECT | 217 | 221 | 230 |     |
| CONECT | 218 | 219 | 231 |     |
| CONECT | 219 | 218 | 232 |     |

|        |     |     |     |     |
|--------|-----|-----|-----|-----|
| CONECT | 220 | 223 |     |     |
| CONECT | 221 | 217 | 222 | 224 |
| CONECT | 222 | 221 |     |     |
| CONECT | 223 | 216 | 220 |     |
| CONECT | 224 | 221 | 225 | 226 |
| CONECT | 225 | 224 |     |     |
| CONECT | 226 | 224 | 227 | 228 |
| CONECT | 227 | 226 |     |     |
| CONECT | 228 | 226 | 229 | 230 |
| CONECT | 229 | 228 |     |     |
| CONECT | 230 | 217 | 228 | 231 |
| CONECT | 231 | 218 | 230 | 215 |
| CONECT | 232 | 219 | 215 | 233 |
| CONECT | 233 | 232 | 234 | 248 |
| CONECT | 234 | 233 | 235 | 236 |
| CONECT | 235 | 234 |     |     |
| CONECT | 236 | 234 | 237 | 238 |
| CONECT | 237 | 236 |     |     |
| CONECT | 238 | 236 | 239 | 247 |
| CONECT | 239 | 238 | 240 | 241 |
| CONECT | 240 | 239 |     |     |
| CONECT | 241 | 239 | 242 | 243 |
| CONECT | 242 | 241 |     |     |
| CONECT | 243 | 241 | 244 | 245 |
| CONECT | 244 | 243 |     |     |
| CONECT | 245 | 243 | 246 | 247 |
| CONECT | 246 | 245 |     |     |
| CONECT | 247 | 238 | 245 | 248 |
| CONECT | 248 | 247 | 233 | 249 |
| CONECT | 249 | 248 |     |     |
| CONECT | 250 | 266 | 267 |     |
| CONECT | 251 | 258 |     |     |
| CONECT | 252 | 256 | 265 |     |
| CONECT | 253 | 254 | 266 |     |
| CONECT | 254 | 253 | 267 |     |
| CONECT | 255 | 258 |     |     |
| CONECT | 256 | 252 | 257 | 259 |
| CONECT | 257 | 256 |     |     |
| CONECT | 258 | 255 | 251 |     |
| CONECT | 259 | 256 | 260 | 261 |
| CONECT | 260 | 259 |     |     |
| CONECT | 261 | 259 | 262 | 263 |
| CONECT | 262 | 261 |     |     |
| CONECT | 263 | 261 | 264 | 265 |
| CONECT | 264 | 263 |     |     |
| CONECT | 265 | 263 | 252 | 266 |
| CONECT | 266 | 250 | 265 | 253 |
| CONECT | 267 | 250 | 254 | 268 |
| CONECT | 268 | 267 | 269 | 283 |
| CONECT | 269 | 268 | 270 | 271 |
| CONECT | 270 | 269 |     |     |
| CONECT | 271 | 269 | 272 | 273 |
| CONECT | 272 | 271 |     |     |
| CONECT | 273 | 271 | 274 | 282 |
| CONECT | 274 | 273 | 275 | 276 |
| CONECT | 275 | 274 |     |     |
| CONECT | 276 | 274 | 277 | 278 |

|        |     |     |     |     |
|--------|-----|-----|-----|-----|
| CONECT | 277 | 276 |     |     |
| CONECT | 278 | 276 | 279 | 280 |
| CONECT | 279 | 278 |     |     |
| CONECT | 280 | 278 | 281 | 282 |
| CONECT | 281 | 280 |     |     |
| CONECT | 282 | 273 | 280 | 283 |
| CONECT | 283 | 268 | 282 | 284 |
| CONECT | 284 | 283 |     |     |
| CONECT | 286 | 302 | 303 |     |
| CONECT | 287 | 294 |     |     |
| CONECT | 288 | 292 | 301 |     |
| CONECT | 289 | 290 | 302 |     |
| CONECT | 290 | 289 | 303 |     |
| CONECT | 291 | 294 |     |     |
| CONECT | 292 | 288 | 293 | 295 |
| CONECT | 293 | 292 |     |     |
| CONECT | 294 | 287 | 291 |     |
| CONECT | 295 | 292 | 296 | 297 |
| CONECT | 296 | 295 |     |     |
| CONECT | 297 | 295 | 298 | 299 |
| CONECT | 298 | 297 |     |     |
| CONECT | 299 | 297 | 300 | 301 |
| CONECT | 300 | 299 |     |     |
| CONECT | 301 | 288 | 299 | 302 |
| CONECT | 302 | 286 | 289 | 301 |
| CONECT | 303 | 286 | 290 | 304 |
| CONECT | 304 | 303 | 305 | 319 |
| CONECT | 305 | 304 | 306 | 307 |
| CONECT | 306 | 305 |     |     |
| CONECT | 307 | 305 | 308 | 309 |
| CONECT | 308 | 307 |     |     |
| CONECT | 309 | 307 | 310 | 318 |
| CONECT | 310 | 309 | 311 | 312 |
| CONECT | 311 | 310 |     |     |
| CONECT | 312 | 310 | 313 | 314 |
| CONECT | 313 | 312 |     |     |
| CONECT | 314 | 312 | 315 | 316 |
| CONECT | 315 | 314 |     |     |
| CONECT | 316 | 314 | 317 | 318 |
| CONECT | 317 | 316 |     |     |
| CONECT | 318 | 309 | 316 | 319 |
| CONECT | 319 | 304 | 318 | 320 |
| CONECT | 320 | 319 |     |     |
| CONECT | 321 | 337 | 338 |     |
| CONECT | 322 | 329 |     |     |
| CONECT | 323 | 327 | 336 |     |
| CONECT | 324 | 325 | 337 |     |
| CONECT | 325 | 324 | 338 |     |
| CONECT | 326 | 329 |     |     |
| CONECT | 327 | 323 | 328 | 330 |
| CONECT | 328 | 327 |     |     |
| CONECT | 329 | 322 | 326 |     |
| CONECT | 330 | 327 | 331 | 332 |
| CONECT | 331 | 330 |     |     |
| CONECT | 332 | 330 | 333 | 334 |
| CONECT | 333 | 332 |     |     |
| CONECT | 334 | 332 | 335 | 336 |



|         |     |     |     |     |
|---------|-----|-----|-----|-----|
| CONNECT | 335 | 334 |     |     |
| CONNECT | 336 | 334 | 323 | 337 |
| CONNECT | 337 | 336 | 321 | 324 |
| CONNECT | 338 | 321 | 325 | 339 |
| CONNECT | 339 | 338 | 340 | 354 |
| CONNECT | 340 | 339 | 341 | 342 |
| CONNECT | 341 | 340 |     |     |
| CONNECT | 342 | 340 | 343 | 344 |
| CONNECT | 343 | 342 |     |     |
| CONNECT | 344 | 342 | 345 | 353 |
| CONNECT | 345 | 344 | 346 | 347 |
| CONNECT | 346 | 345 |     |     |
| CONNECT | 347 | 345 | 348 | 349 |
| CONNECT | 348 | 347 |     |     |
| CONNECT | 349 | 347 | 350 | 351 |
| CONNECT | 350 | 349 |     |     |
| CONNECT | 351 | 349 | 352 | 353 |
| CONNECT | 352 | 351 |     |     |
| CONNECT | 353 | 351 | 344 | 354 |
| CONNECT | 354 | 353 | 339 | 355 |
| CONNECT | 355 | 354 |     |     |
| CONNECT | 357 | 373 | 374 |     |
| CONNECT | 358 | 365 |     |     |
| CONNECT | 359 | 363 | 372 |     |
| CONNECT | 360 | 361 | 373 |     |
| CONNECT | 361 | 360 | 374 |     |
| CONNECT | 362 | 365 |     |     |
| CONNECT | 363 | 359 | 364 | 366 |
| CONNECT | 364 | 363 |     |     |
| CONNECT | 365 | 358 | 362 |     |
| CONNECT | 366 | 363 | 367 | 368 |
| CONNECT | 367 | 366 |     |     |
| CONNECT | 368 | 366 | 369 | 370 |
| CONNECT | 369 | 368 |     |     |
| CONNECT | 370 | 368 | 371 | 372 |
| CONNECT | 371 | 370 |     |     |
| CONNECT | 372 | 359 | 370 | 373 |
| CONNECT | 373 | 357 | 360 | 372 |
| CONNECT | 374 | 357 | 361 | 375 |
| CONNECT | 375 | 374 | 376 | 390 |
| CONNECT | 376 | 375 | 377 | 378 |
| CONNECT | 377 | 376 |     |     |
| CONNECT | 378 | 376 | 379 | 380 |
| CONNECT | 379 | 378 |     |     |
| CONNECT | 380 | 378 | 381 | 389 |
| CONNECT | 381 | 380 | 382 | 383 |
| CONNECT | 382 | 381 |     |     |
| CONNECT | 383 | 381 | 384 | 385 |
| CONNECT | 384 | 383 |     |     |
| CONNECT | 385 | 383 | 386 | 387 |
| CONNECT | 386 | 385 |     |     |
| CONNECT | 387 | 385 | 388 | 389 |
| CONNECT | 388 | 387 |     |     |
| CONNECT | 389 | 380 | 387 | 390 |
| CONNECT | 390 | 375 | 389 | 391 |
| CONNECT | 391 | 390 |     |     |
| CONNECT | 392 | 408 | 409 |     |

|         |     |     |     |     |
|---------|-----|-----|-----|-----|
| CONNECT | 393 | 400 |     |     |
| CONNECT | 394 | 398 | 407 |     |
| CONNECT | 395 | 396 | 408 |     |
| CONNECT | 396 | 395 | 409 |     |
| CONNECT | 397 | 400 |     |     |
| CONNECT | 398 | 394 | 399 | 401 |
| CONNECT | 399 | 398 |     |     |
| CONNECT | 400 | 397 | 393 |     |
| CONNECT | 401 | 398 | 402 | 403 |
| CONNECT | 402 | 401 |     |     |
| CONNECT | 403 | 401 | 404 | 405 |
| CONNECT | 404 | 403 |     |     |
| CONNECT | 405 | 403 | 406 | 407 |
| CONNECT | 406 | 405 |     |     |
| CONNECT | 407 | 405 | 394 | 408 |
| CONNECT | 408 | 407 | 392 | 395 |
| CONNECT | 409 | 392 | 396 | 410 |
| CONNECT | 410 | 409 | 411 | 425 |
| CONNECT | 411 | 410 | 412 | 413 |
| CONNECT | 412 | 411 |     |     |
| CONNECT | 413 | 411 | 414 | 415 |
| CONNECT | 414 | 413 |     |     |
| CONNECT | 415 | 413 | 416 | 424 |
| CONNECT | 416 | 415 | 417 | 418 |
| CONNECT | 417 | 416 |     |     |
| CONNECT | 418 | 416 | 419 | 420 |
| CONNECT | 419 | 418 |     |     |
| CONNECT | 420 | 418 | 421 | 422 |
| CONNECT | 421 | 420 |     |     |
| CONNECT | 422 | 420 | 423 | 424 |
| CONNECT | 423 | 422 |     |     |
| CONNECT | 424 | 415 | 422 | 425 |
| CONNECT | 425 | 424 | 410 | 426 |
| CONNECT | 426 | 425 |     |     |
| CONNECT | 428 | 444 | 445 |     |
| CONNECT | 429 | 436 |     |     |
| CONNECT | 430 | 434 | 443 |     |
| CONNECT | 431 | 432 | 444 |     |
| CONNECT | 432 | 431 | 445 |     |
| CONNECT | 433 | 436 |     |     |
| CONNECT | 434 | 430 | 435 | 437 |
| CONNECT | 435 | 434 |     |     |
| CONNECT | 436 | 429 | 433 |     |
| CONNECT | 437 | 434 | 438 | 439 |
| CONNECT | 438 | 437 |     |     |
| CONNECT | 439 | 437 | 440 | 441 |
| CONNECT | 440 | 439 |     |     |
| CONNECT | 441 | 439 | 442 | 443 |
| CONNECT | 442 | 441 |     |     |
| CONNECT | 443 | 430 | 441 | 444 |
| CONNECT | 444 | 428 | 431 | 443 |
| CONNECT | 445 | 432 | 428 | 446 |
| CONNECT | 446 | 445 | 447 | 461 |
| CONNECT | 447 | 446 | 448 | 449 |
| CONNECT | 448 | 447 |     |     |
| CONNECT | 449 | 447 | 450 | 451 |
| CONNECT | 450 | 449 |     |     |

|         |     |     |     |     |
|---------|-----|-----|-----|-----|
| CONNECT | 451 | 449 | 452 | 460 |
| CONNECT | 452 | 451 | 453 | 454 |
| CONNECT | 453 | 452 |     |     |
| CONNECT | 454 | 452 | 455 | 456 |
| CONNECT | 455 | 454 |     |     |
| CONNECT | 456 | 454 | 457 | 458 |
| CONNECT | 457 | 456 |     |     |
| CONNECT | 458 | 456 | 459 | 460 |
| CONNECT | 459 | 458 |     |     |
| CONNECT | 460 | 451 | 458 | 461 |
| CONNECT | 461 | 460 | 446 | 462 |
| CONNECT | 462 | 461 |     |     |
| CONNECT | 463 | 479 | 480 |     |
| CONNECT | 464 | 471 |     |     |
| CONNECT | 465 | 469 | 478 |     |
| CONNECT | 466 | 467 | 479 |     |
| CONNECT | 467 | 466 | 480 |     |
| CONNECT | 468 | 471 |     |     |
| CONNECT | 469 | 465 | 470 | 472 |
| CONNECT | 470 | 469 |     |     |
| CONNECT | 471 | 464 | 468 |     |
| CONNECT | 472 | 469 | 473 | 474 |
| CONNECT | 473 | 472 |     |     |
| CONNECT | 474 | 472 | 475 | 476 |
| CONNECT | 475 | 474 |     |     |
| CONNECT | 476 | 474 | 477 | 478 |
| CONNECT | 477 | 476 |     |     |
| CONNECT | 478 | 476 | 465 | 479 |
| CONNECT | 479 | 463 | 478 | 466 |
| CONNECT | 480 | 463 | 467 | 481 |
| CONNECT | 481 | 480 | 482 | 496 |
| CONNECT | 482 | 481 | 483 | 484 |
| CONNECT | 483 | 482 |     |     |
| CONNECT | 484 | 482 | 485 | 486 |
| CONNECT | 485 | 484 |     |     |
| CONNECT | 486 | 484 | 487 | 495 |
| CONNECT | 487 | 486 | 488 | 489 |
| CONNECT | 488 | 487 |     |     |
| CONNECT | 489 | 487 | 490 | 491 |
| CONNECT | 490 | 489 |     |     |
| CONNECT | 491 | 489 | 492 | 493 |
| CONNECT | 492 | 491 |     |     |
| CONNECT | 493 | 491 | 494 | 495 |
| CONNECT | 494 | 493 |     |     |
| CONNECT | 495 | 493 | 486 | 496 |
| CONNECT | 496 | 481 | 495 | 497 |
| CONNECT | 497 | 496 |     |     |
| CONNECT | 499 | 515 | 516 |     |
| CONNECT | 500 | 507 |     |     |
| CONNECT | 501 | 505 | 514 |     |
| CONNECT | 502 | 503 | 515 |     |
| CONNECT | 503 | 502 | 516 |     |
| CONNECT | 504 | 507 |     |     |
| CONNECT | 505 | 501 | 506 | 508 |
| CONNECT | 506 | 505 |     |     |
| CONNECT | 507 | 500 | 504 |     |
| CONNECT | 508 | 505 | 509 | 510 |

|        |     |     |     |     |
|--------|-----|-----|-----|-----|
| CONECT | 509 | 508 |     |     |
| CONECT | 510 | 508 | 511 | 512 |
| CONECT | 511 | 510 |     |     |
| CONECT | 512 | 510 | 513 | 514 |
| CONECT | 513 | 512 |     |     |
| CONECT | 514 | 501 | 512 | 515 |
| CONECT | 515 | 502 | 514 | 499 |
| CONECT | 516 | 503 | 499 | 517 |
| CONECT | 517 | 516 | 518 | 532 |
| CONECT | 518 | 517 | 519 | 520 |
| CONECT | 519 | 518 |     |     |
| CONECT | 520 | 518 | 521 | 522 |
| CONECT | 521 | 520 |     |     |
| CONECT | 522 | 520 | 523 | 531 |
| CONECT | 523 | 522 | 524 | 525 |
| CONECT | 524 | 523 |     |     |
| CONECT | 525 | 523 | 526 | 527 |
| CONECT | 526 | 525 |     |     |
| CONECT | 527 | 525 | 528 | 529 |
| CONECT | 528 | 527 |     |     |
| CONECT | 529 | 527 | 530 | 531 |
| CONECT | 530 | 529 |     |     |
| CONECT | 531 | 522 | 529 | 532 |
| CONECT | 532 | 517 | 531 | 533 |
| CONECT | 533 | 532 |     |     |
| CONECT | 534 | 550 | 551 |     |
| CONECT | 535 | 542 |     |     |
| CONECT | 536 | 540 | 549 |     |
| CONECT | 537 | 538 | 550 |     |
| CONECT | 538 | 537 | 551 |     |
| CONECT | 539 | 542 |     |     |
| CONECT | 540 | 536 | 541 | 543 |
| CONECT | 541 | 540 |     |     |
| CONECT | 542 | 535 | 539 |     |
| CONECT | 543 | 540 | 544 | 545 |
| CONECT | 544 | 543 |     |     |
| CONECT | 545 | 543 | 546 | 547 |
| CONECT | 546 | 545 |     |     |
| CONECT | 547 | 545 | 548 | 549 |
| CONECT | 548 | 547 |     |     |
| CONECT | 549 | 547 | 536 | 550 |
| CONECT | 550 | 534 | 537 | 549 |
| CONECT | 551 | 534 | 538 | 552 |
| CONECT | 552 | 551 | 553 | 567 |
| CONECT | 553 | 552 | 554 | 555 |
| CONECT | 554 | 553 |     |     |
| CONECT | 555 | 553 | 556 | 557 |
| CONECT | 556 | 555 |     |     |
| CONECT | 557 | 555 | 558 | 566 |
| CONECT | 558 | 557 | 559 | 560 |
| CONECT | 559 | 558 |     |     |
| CONECT | 560 | 558 | 561 | 562 |
| CONECT | 561 | 560 |     |     |
| CONECT | 562 | 560 | 563 | 564 |
| CONECT | 563 | 562 |     |     |
| CONECT | 564 | 562 | 565 | 566 |
| CONECT | 565 | 564 |     |     |

|         |     |     |     |     |
|---------|-----|-----|-----|-----|
| CONNECT | 566 | 564 | 557 | 567 |
| CONNECT | 567 | 552 | 566 | 568 |
| CONNECT | 568 | 567 |     |     |
| CONNECT | 570 | 586 | 587 |     |
| CONNECT | 571 | 578 |     |     |
| CONNECT | 572 | 576 | 585 |     |
| CONNECT | 573 | 574 | 586 |     |
| CONNECT | 574 | 573 | 587 |     |
| CONNECT | 575 | 578 |     |     |
| CONNECT | 576 | 572 | 577 | 579 |
| CONNECT | 577 | 576 |     |     |
| CONNECT | 578 | 571 | 575 |     |
| CONNECT | 579 | 576 | 580 | 581 |
| CONNECT | 580 | 579 |     |     |
| CONNECT | 581 | 579 | 582 | 583 |
| CONNECT | 582 | 581 |     |     |
| CONNECT | 583 | 581 | 584 | 585 |
| CONNECT | 584 | 583 |     |     |
| CONNECT | 585 | 572 | 583 | 586 |
| CONNECT | 586 | 570 | 573 | 585 |
| CONNECT | 587 | 570 | 574 | 588 |
| CONNECT | 588 | 587 | 589 | 603 |
| CONNECT | 589 | 588 | 590 | 591 |
| CONNECT | 590 | 589 |     |     |
| CONNECT | 591 | 589 | 592 | 593 |
| CONNECT | 592 | 591 |     |     |
| CONNECT | 593 | 591 | 594 | 602 |
| CONNECT | 594 | 593 | 595 | 596 |
| CONNECT | 595 | 594 |     |     |
| CONNECT | 596 | 594 | 597 | 598 |
| CONNECT | 597 | 596 |     |     |
| CONNECT | 598 | 596 | 599 | 600 |
| CONNECT | 599 | 598 |     |     |
| CONNECT | 600 | 598 | 601 | 602 |
| CONNECT | 601 | 600 |     |     |
| CONNECT | 602 | 593 | 600 | 603 |
| CONNECT | 603 | 588 | 602 | 604 |
| CONNECT | 604 | 603 |     |     |
| CONNECT | 605 | 621 | 622 |     |
| CONNECT | 606 | 613 |     |     |
| CONNECT | 607 | 611 | 620 |     |
| CONNECT | 608 | 609 | 621 |     |
| CONNECT | 609 | 608 | 622 |     |
| CONNECT | 610 | 613 |     |     |
| CONNECT | 611 | 607 | 612 | 614 |
| CONNECT | 612 | 611 |     |     |
| CONNECT | 613 | 606 | 610 |     |
| CONNECT | 614 | 611 | 615 | 616 |
| CONNECT | 615 | 614 |     |     |
| CONNECT | 616 | 614 | 617 | 618 |
| CONNECT | 617 | 616 |     |     |
| CONNECT | 618 | 616 | 619 | 620 |
| CONNECT | 619 | 618 |     |     |
| CONNECT | 620 | 618 | 607 | 621 |
| CONNECT | 621 | 605 | 608 | 620 |
| CONNECT | 622 | 605 | 609 | 623 |
| CONNECT | 623 | 622 | 624 | 638 |

|         |     |     |     |     |
|---------|-----|-----|-----|-----|
| CONNECT | 624 | 623 | 625 | 626 |
| CONNECT | 625 | 624 |     |     |
| CONNECT | 626 | 624 | 627 | 628 |
| CONNECT | 627 | 626 |     |     |
| CONNECT | 628 | 626 | 629 | 637 |
| CONNECT | 629 | 628 | 630 | 631 |
| CONNECT | 630 | 629 |     |     |
| CONNECT | 631 | 629 | 632 | 633 |
| CONNECT | 632 | 631 |     |     |
| CONNECT | 633 | 631 | 634 | 635 |
| CONNECT | 634 | 633 |     |     |
| CONNECT | 635 | 633 | 636 | 637 |
| CONNECT | 636 | 635 |     |     |
| CONNECT | 637 | 635 | 628 | 638 |
| CONNECT | 638 | 637 | 623 | 639 |
| CONNECT | 639 | 638 |     |     |
| CONNECT | 641 | 657 | 658 |     |
| CONNECT | 642 | 649 |     |     |
| CONNECT | 643 | 647 | 656 |     |
| CONNECT | 644 | 645 | 657 |     |
| CONNECT | 645 | 644 | 658 |     |
| CONNECT | 646 | 649 |     |     |
| CONNECT | 647 | 643 | 648 | 650 |
| CONNECT | 648 | 647 |     |     |
| CONNECT | 649 | 642 | 646 |     |
| CONNECT | 650 | 647 | 651 | 652 |
| CONNECT | 651 | 650 |     |     |
| CONNECT | 652 | 650 | 653 | 654 |
| CONNECT | 653 | 652 |     |     |
| CONNECT | 654 | 652 | 655 | 656 |
| CONNECT | 655 | 654 |     |     |
| CONNECT | 656 | 643 | 654 | 657 |
| CONNECT | 657 | 641 | 644 | 656 |
| CONNECT | 658 | 641 | 645 | 659 |
| CONNECT | 659 | 658 | 660 | 674 |
| CONNECT | 660 | 659 | 661 | 662 |
| CONNECT | 661 | 660 |     |     |
| CONNECT | 662 | 660 | 663 | 664 |
| CONNECT | 663 | 662 |     |     |
| CONNECT | 664 | 662 | 665 | 673 |
| CONNECT | 665 | 664 | 666 | 667 |
| CONNECT | 666 | 665 |     |     |
| CONNECT | 667 | 665 | 668 | 669 |
| CONNECT | 668 | 667 |     |     |
| CONNECT | 669 | 667 | 670 | 671 |
| CONNECT | 670 | 669 |     |     |
| CONNECT | 671 | 669 | 672 | 673 |
| CONNECT | 672 | 671 |     |     |
| CONNECT | 673 | 664 | 671 | 674 |
| CONNECT | 674 | 659 | 673 | 675 |
| CONNECT | 675 | 674 |     |     |
| CONNECT | 676 | 692 | 693 |     |
| CONNECT | 677 | 684 |     |     |
| CONNECT | 678 | 682 | 691 |     |
| CONNECT | 679 | 680 | 692 |     |
| CONNECT | 680 | 679 | 693 |     |
| CONNECT | 681 | 684 |     |     |

|         |     |     |     |     |
|---------|-----|-----|-----|-----|
| CONNECT | 682 | 678 | 683 | 685 |
| CONNECT | 683 | 682 |     |     |
| CONNECT | 684 | 681 | 677 |     |
| CONNECT | 685 | 682 | 686 | 687 |
| CONNECT | 686 | 685 |     |     |
| CONNECT | 687 | 685 | 688 | 689 |
| CONNECT | 688 | 687 |     |     |
| CONNECT | 689 | 687 | 690 | 691 |
| CONNECT | 690 | 689 |     |     |
| CONNECT | 691 | 678 | 689 | 692 |
| CONNECT | 692 | 691 | 676 | 679 |
| CONNECT | 693 | 676 | 680 | 694 |
| CONNECT | 694 | 693 | 695 | 709 |
| CONNECT | 695 | 694 | 696 | 697 |
| CONNECT | 696 | 695 |     |     |
| CONNECT | 697 | 695 | 698 | 699 |
| CONNECT | 698 | 697 |     |     |
| CONNECT | 699 | 697 | 700 | 708 |
| CONNECT | 700 | 699 | 701 | 702 |
| CONNECT | 701 | 700 |     |     |
| CONNECT | 702 | 700 | 703 | 704 |
| CONNECT | 703 | 702 |     |     |
| CONNECT | 704 | 702 | 705 | 706 |
| CONNECT | 705 | 704 |     |     |
| CONNECT | 706 | 704 | 707 | 708 |
| CONNECT | 707 | 706 |     |     |
| CONNECT | 708 | 699 | 706 | 709 |
| CONNECT | 709 | 708 | 694 | 710 |
| CONNECT | 710 | 709 |     |     |
| CONNECT | 712 | 728 | 729 |     |
| CONNECT | 713 | 720 |     |     |
| CONNECT | 714 | 718 | 727 |     |
| CONNECT | 715 | 716 | 728 |     |
| CONNECT | 716 | 715 | 729 |     |
| CONNECT | 717 | 720 |     |     |
| CONNECT | 718 | 714 | 719 | 721 |
| CONNECT | 719 | 718 |     |     |
| CONNECT | 720 | 713 | 717 |     |
| CONNECT | 721 | 718 | 722 | 723 |
| CONNECT | 722 | 721 |     |     |
| CONNECT | 723 | 721 | 724 | 725 |
| CONNECT | 724 | 723 |     |     |
| CONNECT | 725 | 723 | 726 | 727 |
| CONNECT | 726 | 725 |     |     |
| CONNECT | 727 | 714 | 725 | 728 |
| CONNECT | 728 | 712 | 715 | 727 |
| CONNECT | 729 | 712 | 716 | 730 |
| CONNECT | 730 | 729 | 731 | 745 |
| CONNECT | 731 | 730 | 732 | 733 |
| CONNECT | 732 | 731 |     |     |
| CONNECT | 733 | 731 | 734 | 735 |
| CONNECT | 734 | 733 |     |     |
| CONNECT | 735 | 733 | 736 | 744 |
| CONNECT | 736 | 735 | 737 | 738 |
| CONNECT | 737 | 736 |     |     |
| CONNECT | 738 | 736 | 739 | 740 |
| CONNECT | 739 | 738 |     |     |

|         |     |     |     |     |
|---------|-----|-----|-----|-----|
| CONNECT | 740 | 738 | 741 | 742 |
| CONNECT | 741 | 740 |     |     |
| CONNECT | 742 | 740 | 743 | 744 |
| CONNECT | 743 | 742 |     |     |
| CONNECT | 744 | 735 | 742 | 745 |
| CONNECT | 745 | 730 | 744 | 746 |
| CONNECT | 746 | 745 |     |     |
| CONNECT | 747 | 763 | 764 |     |
| CONNECT | 748 | 755 |     |     |
| CONNECT | 749 | 753 | 762 |     |
| CONNECT | 750 | 751 | 763 |     |
| CONNECT | 751 | 750 | 764 |     |
| CONNECT | 752 | 755 |     |     |
| CONNECT | 753 | 749 | 754 | 756 |
| CONNECT | 754 | 753 |     |     |
| CONNECT | 755 | 748 | 752 |     |
| CONNECT | 756 | 753 | 757 | 758 |
| CONNECT | 757 | 756 |     |     |
| CONNECT | 758 | 756 | 759 | 760 |
| CONNECT | 759 | 758 |     |     |
| CONNECT | 760 | 758 | 761 | 762 |
| CONNECT | 761 | 760 |     |     |
| CONNECT | 762 | 760 | 749 | 763 |
| CONNECT | 763 | 747 | 750 | 762 |
| CONNECT | 764 | 747 | 751 | 765 |
| CONNECT | 765 | 764 | 766 | 780 |
| CONNECT | 766 | 765 | 767 | 768 |
| CONNECT | 767 | 766 |     |     |
| CONNECT | 768 | 766 | 769 | 770 |
| CONNECT | 769 | 768 |     |     |
| CONNECT | 770 | 768 | 771 | 779 |
| CONNECT | 771 | 770 | 772 | 773 |
| CONNECT | 772 | 771 |     |     |
| CONNECT | 773 | 771 | 774 | 775 |
| CONNECT | 774 | 773 |     |     |
| CONNECT | 775 | 773 | 776 | 777 |
| CONNECT | 776 | 775 |     |     |
| CONNECT | 777 | 775 | 778 | 779 |
| CONNECT | 778 | 777 |     |     |
| CONNECT | 779 | 770 | 777 | 780 |
| CONNECT | 780 | 765 | 779 | 781 |
| CONNECT | 781 | 780 |     |     |
| CONNECT | 783 | 799 | 800 |     |
| CONNECT | 784 | 791 |     |     |
| CONNECT | 785 | 789 | 798 |     |
| CONNECT | 786 | 787 | 799 |     |
| CONNECT | 787 | 786 | 800 |     |
| CONNECT | 788 | 791 |     |     |
| CONNECT | 789 | 785 | 790 | 792 |
| CONNECT | 790 | 789 |     |     |
| CONNECT | 791 | 788 | 784 |     |
| CONNECT | 792 | 789 | 793 | 794 |
| CONNECT | 793 | 792 |     |     |
| CONNECT | 794 | 792 | 795 | 796 |
| CONNECT | 795 | 794 |     |     |
| CONNECT | 796 | 794 | 797 | 798 |
| CONNECT | 797 | 796 |     |     |



|         |     |     |     |     |
|---------|-----|-----|-----|-----|
| CONNECT | 798 | 785 | 796 | 799 |
| CONNECT | 799 | 786 | 798 | 783 |
| CONNECT | 800 | 787 | 783 | 801 |
| CONNECT | 801 | 800 | 802 | 816 |
| CONNECT | 802 | 801 | 803 | 804 |
| CONNECT | 803 | 802 |     |     |
| CONNECT | 804 | 802 | 805 | 806 |
| CONNECT | 805 | 804 |     |     |
| CONNECT | 806 | 804 | 807 | 815 |
| CONNECT | 807 | 806 | 808 | 809 |
| CONNECT | 808 | 807 |     |     |
| CONNECT | 809 | 807 | 810 | 811 |
| CONNECT | 810 | 809 |     |     |
| CONNECT | 811 | 809 | 812 | 813 |
| CONNECT | 812 | 811 |     |     |
| CONNECT | 813 | 811 | 814 | 815 |
| CONNECT | 814 | 813 |     |     |
| CONNECT | 815 | 806 | 813 | 816 |
| CONNECT | 816 | 801 | 815 | 817 |
| CONNECT | 817 | 816 |     |     |
| CONNECT | 818 | 834 | 835 |     |
| CONNECT | 819 | 826 |     |     |
| CONNECT | 820 | 824 | 833 |     |
| CONNECT | 821 | 822 | 834 |     |
| CONNECT | 822 | 821 | 835 |     |
| CONNECT | 823 | 826 |     |     |
| CONNECT | 824 | 820 | 825 | 827 |
| CONNECT | 825 | 824 |     |     |
| CONNECT | 826 | 819 | 823 |     |
| CONNECT | 827 | 824 | 828 | 829 |
| CONNECT | 828 | 827 |     |     |
| CONNECT | 829 | 827 | 830 | 831 |
| CONNECT | 830 | 829 |     |     |
| CONNECT | 831 | 829 | 832 | 833 |
| CONNECT | 832 | 831 |     |     |
| CONNECT | 833 | 831 | 820 | 834 |
| CONNECT | 834 | 833 | 818 | 821 |
| CONNECT | 835 | 818 | 822 | 836 |
| CONNECT | 836 | 835 | 837 | 851 |
| CONNECT | 837 | 836 | 838 | 839 |
| CONNECT | 838 | 837 |     |     |
| CONNECT | 839 | 837 | 840 | 841 |
| CONNECT | 840 | 839 |     |     |
| CONNECT | 841 | 839 | 842 | 850 |
| CONNECT | 842 | 841 | 843 | 844 |
| CONNECT | 843 | 842 |     |     |
| CONNECT | 844 | 842 | 845 | 846 |
| CONNECT | 845 | 844 |     |     |
| CONNECT | 846 | 844 | 847 | 848 |
| CONNECT | 847 | 846 |     |     |
| CONNECT | 848 | 846 | 849 | 850 |
| CONNECT | 849 | 848 |     |     |
| CONNECT | 850 | 848 | 841 | 851 |
| CONNECT | 851 | 836 | 850 | 852 |
| CONNECT | 852 | 851 |     |     |
| CONNECT | 854 | 870 | 871 |     |
| CONNECT | 855 | 862 |     |     |

|         |     |     |     |     |
|---------|-----|-----|-----|-----|
| CONNECT | 856 | 860 | 869 |     |
| CONNECT | 857 | 858 | 870 |     |
| CONNECT | 858 | 857 | 871 |     |
| CONNECT | 859 | 862 |     |     |
| CONNECT | 860 | 856 | 861 | 863 |
| CONNECT | 861 | 860 |     |     |
| CONNECT | 862 | 855 | 859 |     |
| CONNECT | 863 | 860 | 864 | 865 |
| CONNECT | 864 | 863 |     |     |
| CONNECT | 865 | 863 | 866 | 867 |
| CONNECT | 866 | 865 |     |     |
| CONNECT | 867 | 865 | 868 | 869 |
| CONNECT | 868 | 867 |     |     |
| CONNECT | 869 | 856 | 867 | 870 |
| CONNECT | 870 | 854 | 857 | 869 |
| CONNECT | 871 | 858 | 854 | 872 |
| CONNECT | 872 | 871 | 873 | 887 |
| CONNECT | 873 | 872 | 874 | 875 |
| CONNECT | 874 | 873 |     |     |
| CONNECT | 875 | 873 | 876 | 877 |
| CONNECT | 876 | 875 |     |     |
| CONNECT | 877 | 875 | 878 | 886 |
| CONNECT | 878 | 877 | 879 | 880 |
| CONNECT | 879 | 878 |     |     |
| CONNECT | 880 | 878 | 881 | 882 |
| CONNECT | 881 | 880 |     |     |
| CONNECT | 882 | 880 | 883 | 884 |
| CONNECT | 883 | 882 |     |     |
| CONNECT | 884 | 882 | 885 | 886 |
| CONNECT | 885 | 884 |     |     |
| CONNECT | 886 | 877 | 884 | 887 |
| CONNECT | 887 | 872 | 886 | 888 |
| CONNECT | 888 | 887 |     |     |
| CONNECT | 889 | 905 | 906 |     |
| CONNECT | 890 | 897 |     |     |
| CONNECT | 891 | 895 | 904 |     |
| CONNECT | 892 | 893 | 905 |     |
| CONNECT | 893 | 892 | 906 |     |
| CONNECT | 894 | 897 |     |     |
| CONNECT | 895 | 891 | 896 | 898 |
| CONNECT | 896 | 895 |     |     |
| CONNECT | 897 | 890 | 894 |     |
| CONNECT | 898 | 895 | 899 | 900 |
| CONNECT | 899 | 898 |     |     |
| CONNECT | 900 | 898 | 901 | 902 |
| CONNECT | 901 | 900 |     |     |
| CONNECT | 902 | 900 | 903 | 904 |
| CONNECT | 903 | 902 |     |     |
| CONNECT | 904 | 902 | 891 | 905 |
| CONNECT | 905 | 904 | 889 | 892 |
| CONNECT | 906 | 889 | 893 | 907 |
| CONNECT | 907 | 906 | 908 | 922 |
| CONNECT | 908 | 907 | 909 | 910 |
| CONNECT | 909 | 908 |     |     |
| CONNECT | 910 | 908 | 911 | 912 |
| CONNECT | 911 | 910 |     |     |
| CONNECT | 912 | 910 | 913 | 921 |

|         |     |     |     |     |
|---------|-----|-----|-----|-----|
| CONNECT | 913 | 912 | 914 | 915 |
| CONNECT | 914 | 913 |     |     |
| CONNECT | 915 | 913 | 916 | 917 |
| CONNECT | 916 | 915 |     |     |
| CONNECT | 917 | 915 | 918 | 919 |
| CONNECT | 918 | 917 |     |     |
| CONNECT | 919 | 917 | 920 | 921 |
| CONNECT | 920 | 919 |     |     |
| CONNECT | 921 | 919 | 912 | 922 |
| CONNECT | 922 | 907 | 921 | 923 |
| CONNECT | 923 | 922 |     |     |
| CONNECT | 925 | 941 | 942 |     |
| CONNECT | 926 | 933 |     |     |
| CONNECT | 927 | 931 | 940 |     |
| CONNECT | 928 | 929 | 941 |     |
| CONNECT | 929 | 928 | 942 |     |
| CONNECT | 930 | 933 |     |     |
| CONNECT | 931 | 927 | 932 | 934 |
| CONNECT | 932 | 931 |     |     |
| CONNECT | 933 | 926 | 930 |     |
| CONNECT | 934 | 931 | 935 | 936 |
| CONNECT | 935 | 934 |     |     |
| CONNECT | 936 | 934 | 937 | 938 |
| CONNECT | 937 | 936 |     |     |
| CONNECT | 938 | 936 | 939 | 940 |
| CONNECT | 939 | 938 |     |     |
| CONNECT | 940 | 927 | 938 | 941 |
| CONNECT | 941 | 925 | 928 | 940 |
| CONNECT | 942 | 929 | 925 | 943 |
| CONNECT | 943 | 942 | 944 | 958 |
| CONNECT | 944 | 943 | 945 | 946 |
| CONNECT | 945 | 944 |     |     |
| CONNECT | 946 | 944 | 947 | 948 |
| CONNECT | 947 | 946 |     |     |
| CONNECT | 948 | 946 | 949 | 957 |
| CONNECT | 949 | 948 | 950 | 951 |
| CONNECT | 950 | 949 |     |     |
| CONNECT | 951 | 949 | 952 | 953 |
| CONNECT | 952 | 951 |     |     |
| CONNECT | 953 | 951 | 954 | 955 |
| CONNECT | 954 | 953 |     |     |
| CONNECT | 955 | 953 | 956 | 957 |
| CONNECT | 956 | 955 |     |     |
| CONNECT | 957 | 948 | 955 | 958 |
| CONNECT | 958 | 943 | 957 | 959 |
| CONNECT | 959 | 958 |     |     |
| CONNECT | 960 | 976 | 977 |     |
| CONNECT | 961 | 968 |     |     |
| CONNECT | 962 | 966 | 975 |     |
| CONNECT | 963 | 964 | 976 |     |
| CONNECT | 964 | 963 | 977 |     |
| CONNECT | 965 | 968 |     |     |
| CONNECT | 966 | 962 | 967 | 969 |
| CONNECT | 967 | 966 |     |     |
| CONNECT | 968 | 965 | 961 |     |
| CONNECT | 969 | 966 | 970 | 971 |
| CONNECT | 970 | 969 |     |     |

CONNECT 971 969 972 973  
CONNECT 972 971  
CONNECT 973 971 974 975  
CONNECT 974 973  
CONNECT 975 973 962 976  
CONNECT 976 960 963 975  
CONNECT 977 960 964 978  
CONNECT 978 977 979 993  
CONNECT 979 978 980 981  
CONNECT 980 979  
CONNECT 981 979 982 983  
CONNECT 982 981  
CONNECT 983 981 984 992  
CONNECT 984 983 985 986  
CONNECT 985 984  
CONNECT 986 984 987 988  
CONNECT 987 986  
CONNECT 988 986 989 990  
CONNECT 989 988  
CONNECT 990 988 991 992  
CONNECT 991 990  
CONNECT 992 990 983 993  
CONNECT 993 992 978 994  
CONNECT 994 993  
CONNECT 996 1012 1013  
CONNECT 997 1004  
CONNECT 998 1002 1011  
CONNECT 999 1000 1012  
CONNECT 1000 999 1013  
CONNECT 1001 1004  
CONNECT 1002 998 1003 1005  
CONNECT 1003 1002  
CONNECT 1004 997 1001  
CONNECT 1005 1002 1006 1007  
CONNECT 1006 1005  
CONNECT 1007 1005 1008 1009  
CONNECT 1008 1007  
CONNECT 1009 1007 1010 1011  
CONNECT 1010 1009  
CONNECT 1011 998 1009 1012  
CONNECT 1012 999 1011 996  
CONNECT 1013 996 1000 1014  
CONNECT 1014 1013 1015 1029  
CONNECT 1015 1014 1016 1017  
CONNECT 1016 1015  
CONNECT 1017 1015 1018 1019  
CONNECT 1018 1017  
CONNECT 1019 1017 1020 1028  
CONNECT 1020 1019 1021 1022  
CONNECT 1021 1020  
CONNECT 1022 1020 1023 1024  
CONNECT 1023 1022  
CONNECT 1024 1022 1025 1026  
CONNECT 1025 1024  
CONNECT 1026 1024 1027 1028  
CONNECT 1027 1026  
CONNECT 1028 1019 1026 1029

```
CONNECT 1029 1014 1028 1030
CONNECT 1030 1029
CONNECT 1031 1047 1048
CONNECT 1032 1039
CONNECT 1033 1037 1046
CONNECT 1034 1035 1047
CONNECT 1035 1034 1048
CONNECT 1036 1039
CONNECT 1037 1033 1038 1040
CONNECT 1038 1037
CONNECT 1039 1032 1036
CONNECT 1040 1037 1041 1042
CONNECT 1041 1040
CONNECT 1042 1040 1043 1044
CONNECT 1043 1042
CONNECT 1044 1042 1045 1046
CONNECT 1045 1044
CONNECT 1046 1044 1033 1047
CONNECT 1047 1031 1034 1046
CONNECT 1048 1031 1035 1049
CONNECT 1049 1048 1050 1064
CONNECT 1050 1049 1051 1052
CONNECT 1051 1050
CONNECT 1052 1050 1053 1054
CONNECT 1053 1052
CONNECT 1054 1052 1055 1063
CONNECT 1055 1054 1056 1057
CONNECT 1056 1055
CONNECT 1057 1055 1058 1059
CONNECT 1058 1057
CONNECT 1059 1057 1060 1061
CONNECT 1060 1059
CONNECT 1061 1059 1062 1063
CONNECT 1062 1061
CONNECT 1063 1061 1054 1064
CONNECT 1064 1049 1063 1065
CONNECT 1065 1064
```

The description of the movies illustrating the first 10 vibrational modes for model systems.

40 movies are attached separately as gif-files. They illustrate the first 10 vibrational modes of the central Fe molecule in the corresponding matrix. The names are coded in the following way: the name HS\_in\_HS\_mode1\_25 means that the shown vibration is the first mode of the HS molecule in the model HS matrix (Zn matrix) that occur with energy of 25 cm<sup>-1</sup>. Similarly, LS\_in\_LS\_mode2\_36 shows the second mode (at 36 cm<sup>-1</sup>) of the LS molecule in the LS matrix.
